# Supplementary material for: Mechanism for differential recruitment of orbitostriatal transmission during actions and outcomes following chronic alcohol exposure
Source: eLife. 2021 Mar 17;10:e67065. doi: 10.7554/eLife.67065 (PMC8016477; doi:10.7554/eLife.67065)
Supplement: Figure 1—figure supplement 1—source data 1. [file elife-67065-fig1-figsupp1-data1.xlsx]

## Sheet: A
Air V	Air DV	CIE V	CIE DV
60	59	152	15
31	8	25	33
89	25	16	6
104	28	201	184
150	9	177	233
		237	128
		38	183

## Sheet: C-Air
-0.26407	-0.313506	-0.35951	-0.340353	-0.236025	-0.175304	-0.189302	-0.310317	-0.497367	-0.761215	-1.02033	-1.15039	-1.09253	-0.908002	-0.648425	-0.360243	-0.0693647	0.283288	0.609488	0.911441	1.08847	1.1692	1.2063	1.29962	1.45645	1.69357	1.92435	2.15096	2.32866	2.4511	2.53286	2.57853	2.48656	2.3236	2.17691	2.01994	1.87532	1.60812	1.27336	0.928148	0.693818	0.587119	0.650389	0.815353	1.00578	1.17967	1.32042	1.4631	1.61403	1.7494
0.0977596	0.226899	0.457858	0.697636	0.944312	1.09457	1.16917	1.20345	1.2897	1.43463	1.65376	1.86704	2.07646	2.24068	2.35383	2.42938	2.47159	2.3866	2.236	2.10044	1.95537	1.82173	1.57479	1.26543	0.946404	0.729849	0.631244	0.689715	0.842165	1.01815	1.17885	1.30892	1.44077	1.58025	1.70536	1.83419	1.99261	2.20555	2.38237	2.46171	2.44676	2.29804	2.08773	1.8383	1.62264	1.446	1.33728	1.2961	1.39735	1.50676
-1.35878	-1.34471	-1.30362	-1.22853	-1.21886	-1.26916	-1.37561	-1.43721	-1.2986	-1.05853	-0.784411	-0.61581	-0.559046	-0.567181	-0.576176	-0.627128	-0.688659	-0.739585	-0.762642	-0.663824	-0.509457	-0.280652	-0.0262995	0.137951	0.212371	0.248987	0.217521	0.141812	-0.000959093	-0.180578	-0.368679	-0.462877	-0.463011	-0.374654	-0.233985	-0.155339	-0.141753	-0.170242	-0.210795	-0.251844	-0.317099	-0.375262	-0.439153	-0.515422	-0.560199	-0.66309	-0.828176	-1.06683	-1.29442	-1.44147
-0.349986	-0.286971	-0.137276	0.0756745	0.373389	0.655147	0.798275	0.819791	0.785227	0.742524	0.809104	0.895336	0.946081	0.953435	0.92589	0.936194	0.975439	0.951954	0.86131	0.674342	0.527834	0.535511	0.66354	0.846387	1.01487	1.02082	0.881407	0.644563	0.385273	0.17148	0.0359448	0.0266784	0.150529	0.400984	0.653034	0.83628	0.768051	0.505724	0.0694374	-0.367533	-0.714833	-0.95121	-1.07857	-1.17068	-1.20726	-1.17993	-1.07745	-0.944853	-0.80417	-0.729841
-0.670267	-0.62688	-0.500272	-0.367318	-0.241419	-0.130537	-0.0706074	-0.0793272	-0.0724904	-0.0975331	-0.138925	-0.22999	-0.366141	-0.439936	-0.412433	-0.307291	-0.17133	-0.0602791	0.00472235	0.0706065	0.100432	0.161872	0.201188	0.235467	0.187261	0.138912	0.057604	0.0586753	0.16034	0.417574	0.760461	1.14101	1.49475	1.73273	1.85025	1.80858	1.62182	1.31411	0.958679	0.638483	0.426977	0.336855	0.308147	0.205219	0.0203211	-0.152915	-0.238756	-0.165718	0.0509012	0.263375
0.248951	0.0328159	-0.24637	-0.495839	-0.699247	-0.784302	-0.70787	-0.482999	-0.158433	0.2421	0.607747	0.868511	0.938111	0.853894	0.718596	0.67861	0.7762	0.957971	1.21898	1.45654	1.61223	1.66586	1.62572	1.58235	1.52332	1.43994	1.30745	1.17446	1.05303	1.02586	1.09231	1.18262	1.2332	1.17687	1.05034	0.824349	0.53903	0.227106	-0.0258857	-0.188871	-0.26045	-0.220616	-0.179115	-0.18086	-0.294972	-0.436031	-0.614577	-0.688606	-0.712305	-0.715839
-0.46317	-0.22952	0.0564115	0.411685	0.7475	0.997139	1.0674	0.982384	0.845808	0.805445	0.903956	1.08744	1.35092	1.59072	1.74788	1.80202	1.7615	1.71771	1.65813	1.57397	1.44022	1.30598	1.1834	1.15597	1.22306	1.31422	1.36527	1.30841	1.18069	0.95256	0.664547	0.349678	0.0942975	-0.0702268	-0.142482	-0.102272	-0.0603786	-0.0621404	-0.177329	-0.31972	-0.499952	-0.57468	-0.598602	-0.60217	-0.607614	-0.610288	-0.644044	-0.67458	-0.601776	-0.468658
1.15097	1.17734	1.21489	1.20909	1.16268	1.05662	0.938923	0.831453	0.807409	0.866224	0.946148	0.990904	0.941058	0.82908	0.629075	0.376567	0.100516	-0.123382	-0.267624	-0.330971	-0.295718	-0.25899	-0.260534	-0.361523	-0.48636	-0.644373	-0.709889	-0.730862	-0.73399	-0.738763	-0.741107	-0.770701	-0.797473	-0.733644	-0.616937	-0.432526	-0.26412	-0.0903691	0.0260713	0.0805007	0.0592264	0.0513482	0.0207162	-0.0301394	-0.124242	-0.265479	-0.399793	-0.517471	-0.567139	-0.596981
0.659083	0.636438	0.616715	0.644439	0.723205	0.807598	0.849757	0.802803	0.69732	0.508918	0.271059	0.0110205	-0.199889	-0.335763	-0.395436	-0.362228	-0.32763	-0.329085	-0.424215	-0.54181	-0.690657	-0.752373	-0.772129	-0.775076	-0.779571	-0.78178	-0.809657	-0.834876	-0.77475	-0.664813	-0.4911	-0.332463	-0.168791	-0.0591053	-0.00783335	-0.0278736	-0.0352947	-0.0641498	-0.112055	-0.200699	-0.333743	-0.460266	-0.571117	-0.617903	-0.646014	-0.676526	-0.668033	-0.540821	-0.308197	-0.0348358
-0.0670607	-0.0794544	-0.117303	-0.123756	-0.149142	-0.191183	-0.281462	-0.416961	-0.545818	-0.658714	-0.706364	-0.734994	-0.766069	-0.757418	-0.627859	-0.390944	-0.112538	0.094843	0.188622	0.194178	0.156295	0.0992995	0.0679642	0.0256838	0.0071855	-0.0105664	-0.0107195	0.00739107	0.0664284	0.190614	0.305088	0.376435	0.41168	0.412347	0.407363	0.36236	0.281498	0.223437	0.206379	0.173881	0.166846	0.145421	0.103399	0.0202424	-0.0933491	-0.177565	-0.205808	-0.203955	-0.166159	-0.193657
0.354807	0.372115	0.337231	0.240305	0.113037	0.0513196	0.0768151	0.131659	0.139104	0.0586987	-0.0541527	-0.136548	-0.137533	-0.0620512	0.0401628	0.0950429	0.079332	-0.0222426	-0.219938	-0.458759	-0.664219	-0.810437	-0.880464	-0.905174	-0.955131	-1.0396	-1.05726	-1.01212	-0.866837	-0.599431	-0.25195	0.152692	0.515825	0.708463	0.718014	0.579166	0.439386	0.383768	0.362565	0.332089	0.166515	-0.118407	-0.449164	-0.705402	-0.833571	-0.877319	-0.90434	-0.931856	-0.946607	-0.881062
-0.0755084	0.00227538	0.0684874	0.0903025	0.0546987	-0.0556378	-0.25652	-0.499191	-0.707963	-0.856539	-0.927694	-0.952802	-1.00356	-1.0894	-1.10734	-1.06147	-0.913848	-0.642131	-0.289048	0.122117	0.491104	0.686847	0.696553	0.555465	0.413432	0.356918	0.335373	0.304406	0.136163	-0.153352	-0.489442	-0.74981	-0.880045	-0.924498	-0.951955	-0.979914	-0.994903	-0.928302	-0.794077	-0.630542	-0.465715	-0.334108	-0.242291	-0.18533	-0.117554	0.0535166	0.325374	0.644078	0.922667	1.02264
-0.0944164	-0.0213465	0.0202722	-0.00396004	-0.0959226	-0.20286	-0.250946	-0.193504	-0.069415	0.104489	0.288254	0.429259	0.577707	0.754844	0.951023	1.09257	1.19777	1.19736	1.14422	1.00178	0.861625	0.774902	0.744374	0.704303	0.72077	0.759327	0.801444	0.827187	0.872703	0.885287	0.927337	1.00324	1.07353	1.11557	1.07935	0.946574	0.76188	0.565688	0.325091	0.155858	0.0502578	0.00613988	0.0168665	0.016031	-0.0141568	-0.0765731	-0.139075	-0.124345	-0.0615473	0.0055731
-0.0571823	-0.0608309	-0.081303	-0.120455	-0.184069	-0.23929	-0.22617	-0.170236	-0.110452	-0.0685466	-0.0483502	-0.0647316	-0.073745	-0.090231	-0.115077	-0.152309	-0.206645	-0.3103	-0.428046	-0.517178	-0.536833	-0.494409	-0.431689	-0.428615	-0.563552	-0.786857	-1.03042	-1.17101	-1.12239	-0.918705	-0.694506	-0.597064	-0.642714	-0.745139	-0.829372	-0.824032	-0.665399	-0.442797	-0.193692	-0.0129371	0.0555726	0.00493292	-0.0946401	-0.178495	-0.189035	-0.120816	-0.0544689	-0.0345289	-0.133478	-0.316946
-1.22162	-0.944115	-0.75401	-0.711005	-0.790326	-0.911278	-1.00028	-0.994637	-0.827023	-0.591816	-0.328607	-0.137618	-0.0652296	-0.118737	-0.223947	-0.31255	-0.323687	-0.251605	-0.181502	-0.160433	-0.264984	-0.45884	-0.637251	-0.724896	-0.72935	-0.667592	-0.65095	-0.693932	-0.765925	-0.837566	-0.895857	-0.918435	-0.942906	-0.907748	-0.824172	-0.719013	-0.651553	-0.648519	-0.687609	-0.75929	-0.781171	-0.756945	-0.691323	-0.638154	-0.577458	-0.535594	-0.510789	-0.561573	-0.63648	-0.702897
-0.22497	-0.139832	-0.0967706	-0.113857	-0.14328	-0.1598	-0.136033	-0.0546294	-0.0117207	-0.0893259	-0.239948	-0.343547	-0.336699	-0.164945	0.20484	0.635599	1.01694	1.22414	1.20821	1.01566	0.720783	0.451396	0.310831	0.328134	0.423537	0.516406	0.606205	0.578511	0.496844	0.420738	0.427298	0.546776	0.729507	0.868162	0.823859	0.566976	0.124502	-0.260317	-0.516324	-0.608448	-0.561091	-0.46471	-0.403216	-0.413726	-0.49773	-0.589124	-0.584158	-0.539288	-0.45109	-0.38689
-0.229732	-0.131398	-0.0181362	0.0244093	-0.0623072	-0.226557	-0.336276	-0.329024	-0.147123	0.244507	0.700713	1.10458	1.32402	1.30715	1.10322	0.790928	0.505628	0.356759	0.375084	0.476123	0.574479	0.669582	0.640253	0.55376	0.473158	0.480107	0.606642	0.800168	0.947014	0.900094	0.628036	0.159422	-0.24813	-0.519259	-0.616826	-0.566672	-0.464597	-0.39947	-0.4106	-0.499567	-0.59636	-0.591102	-0.54358	-0.450173	-0.38218	-0.416207	-0.470712	-0.450689	-0.347182	-0.206637
0.679253	0.588677	0.520228	0.462086	0.395013	0.206924	-0.0104445	-0.186748	-0.278123	-0.24233	-0.105177	0.0490209	0.13705	0.204244	0.216325	0.290231	0.424553	0.69808	1.08155	1.43319	1.66101	1.7143	1.58225	1.35574	1.15611	1.03506	1.02233	1.05252	1.12946	1.18145	1.26667	1.32	1.31432	1.0839	0.625197	0.0674633	-0.435999	-0.745803	-0.872705	-0.864561	-0.78443	-0.673391	-0.540142	-0.397054	-0.153975	0.152096	0.456273	0.666815	0.707766	0.597717
1.09256	0.944357	0.841242	0.793282	0.80659	0.843327	0.912622	0.959448	1.0362	1.08424	1.07912	0.871589	0.458452	-0.0438814	-0.497334	-0.776365	-0.89066	-0.883326	-0.811155	-0.711145	-0.591132	-0.462257	-0.243324	0.0323444	0.306307	0.495935	0.532819	0.433701	0.276779	0.17909	0.188503	0.284364	0.329291	0.296284	0.148326	-0.0311161	-0.200051	-0.305709	-0.295082	-0.227107	-0.172154	-0.209917	-0.268709	-0.424529	-0.558288	-0.632541	-0.647125	-0.60135	-0.538513	-0.435117
-0.491986	-0.55882	-0.586184	-0.536976	-0.459802	-0.405433	-0.441253	-0.497019	-0.644822	-0.771697	-0.84213	-0.855963	-0.812543	-0.75294	-0.654864	-0.508308	-0.28442	1.4374e-05	0.30745	0.508343	0.567332	0.499579	0.384365	0.24247	0.129007	0.108263	0.181336	0.302358	0.429214	0.567548	0.694965	0.761678	0.762603	0.648355	0.45592	0.2718	0.110246	0.0166269	-0.0653396	-0.0983112	-0.0918287	-0.0928201	-0.0862324	-0.124942	-0.219787	-0.363584	-0.451335	-0.432481	-0.342513	-0.276737
-0.115755	-0.413855	-0.639776	-0.787206	-0.865409	-0.883433	-0.898079	-0.877783	-0.936415	-1.08833	-1.25762	-1.41382	-1.51952	-1.59821	-1.67594	-1.77873	-1.86315	-1.85489	-1.74648	-1.54209	-1.40115	-1.34742	-1.40596	-1.52999	-1.70601	-1.85588	-1.94171	-2.0237	-2.11877	-2.26545	-2.37277	-2.3641	-2.21349	-1.8958	-1.58043	-1.33926	-1.2543	-1.33162	-1.579	-1.90905	-2.18198	-2.28039	-2.19968	-1.99239	-1.72422	-1.5363	-1.45307	-1.51761	-1.66355	-1.87155
-0.614387	-0.636426	-0.740765	-0.914084	-1.08479	-1.24112	-1.34333	-1.41942	-1.49458	-1.59397	-1.6756	-1.66761	-1.56279	-1.36515	-1.22887	-1.17692	-1.23352	-1.35345	-1.52365	-1.66857	-1.75157	-1.83085	-1.92277	-2.06461	-2.16837	-2.15999	-2.01436	-1.70717	-1.40223	-1.16903	-1.08687	-1.16164	-1.40084	-1.71998	-1.98389	-2.07904	-2.00101	-1.80057	-1.54126	-1.35955	-1.27908	-1.34148	-1.4826	-1.68372	-1.88434	-2.04313	-2.0768	-1.96858	-1.68806	-1.28883
-1.04419	-1.09396	-1.18471	-1.2679	-1.31846	-1.37871	-1.45743	-1.5789	-1.66777	-1.66058	-1.53587	-1.27279	-1.01164	-0.811927	-0.741567	-0.805596	-1.01045	-1.28376	-1.50978	-1.59127	-1.52443	-1.35277	-1.13071	-0.975089	-0.906172	-0.959615	-1.08047	-1.25271	-1.42452	-1.56051	-1.58935	-1.49666	-1.25642	-0.914524	-0.569043	-0.262008	-0.0371096	0.0341902	-0.0404498	-0.239254	-0.526352	-0.84176	-1.11079	-1.31753	-1.39975	-1.38483	-1.24361	-1.00332	-0.778706	-0.614232
0.666678	0.784376	0.921609	1.07362	1.1095	1.07023	0.969233	0.807298	0.5758	0.297527	0.0802992	-0.0555935	-0.0561925	0.0464152	0.199455	0.291916	0.311966	0.289571	0.231025	0.289535	0.453776	0.716043	0.920101	1.01658	1.01184	0.98507	0.93152	0.910624	0.921062	0.953357	1.01877	1.08104	1.16732	1.17768	1.14789	1.07313	0.933843	0.731604	0.487627	0.177747	-0.143304	-0.318147	-0.332795	-0.158986	0.0624691	0.290298	0.428388	0.463036	0.377563	0.180083
-0.0821331	0.00892822	0.0688008	0.090002	0.0586722	-0.0331118	-0.15475	-0.295565	-0.412319	-0.438112	-0.355595	-0.203418	-0.089538	-0.0213753	-0.0126873	-0.0987706	-0.180691	-0.254488	-0.419838	-0.627254	-0.841923	-0.970958	-1.02974	-1.07288	-1.14013	-1.23287	-1.27225	-1.18208	-0.891576	-0.489818	-0.0992101	0.159836	0.218095	0.124558	-0.0603091	-0.273856	-0.476322	-0.56143	-0.4939	-0.356172	-0.27737	-0.288137	-0.357959	-0.414594	-0.442739	-0.4238	-0.40487	-0.398814	-0.379223	-0.348846
-0.549373	-0.488953	-0.466004	-0.593376	-0.790925	-1.01272	-1.15321	-1.2172	-1.26417	-1.33739	-1.43836	-1.48123	-1.38307	-1.06678	-0.629379	-0.204114	0.0779152	0.141344	0.0395077	-0.161762	-0.394256	-0.614685	-0.707344	-0.633823	-0.483875	-0.398081	-0.409803	-0.485821	-0.547481	-0.578123	-0.557503	-0.536893	-0.5303	-0.508971	-0.475899	-0.420904	-0.416132	-0.47927	-0.567327	-0.629286	-0.626564	-0.514243	-0.307232	-0.0643437	0.0859862	0.0772114	-0.0731202	-0.368793	-0.543995	-0.578598
0.481729	0.572765	0.582933	0.500771	0.328957	0.0443374	-0.118883	-0.151119	-0.0237026	0.19577	0.424148	0.650582	0.840799	0.928862	0.862325	0.666882	0.370551	0.151895	0.0850022	0.132821	0.317438	0.562498	0.834052	1.04044	1.17344	1.17555	1.07491	0.935934	0.909831	0.980443	1.14537	1.36113	1.5219	1.56293	1.53602	1.42599	1.25239	1.03625	0.793275	0.558833	0.391165	0.263123	0.115207	-0.0865816	-0.323959	-0.503535	-0.565823	-0.464454	-0.343548	-0.197312
1.24896	1.24125	1.24028	1.17743	1.05387	0.916685	0.891695	0.959297	1.11719	1.32376	1.47767	1.51695	1.49119	1.38584	1.21965	1.01272	0.780108	0.555662	0.395143	0.27256	0.130951	-0.0622349	-0.289491	-0.461411	-0.521043	-0.423996	-0.308245	-0.168244	-0.0815915	-0.0299426	-0.00566697	0.0368743	0.0695773	0.122648	0.218853	0.333524	0.418654	0.423414	0.417801	0.371047	0.317384	0.217481	0.133105	0.0286616	-0.0765815	-0.0785986	0.0598673	0.305616	0.511567	0.583279
-0.369056	-0.245182	-0.12028	0.0353107	0.217518	0.297173	0.290855	0.156219	-0.0530371	-0.179675	-0.154813	0.0389254	0.324856	0.606456	0.796365	0.790169	0.684795	0.498124	0.362452	0.310574	0.309121	0.253305	0.118747	-0.00547049	-0.107842	-0.0641477	0.0912993	0.305927	0.516025	0.766151	1.02094	1.21703	1.24269	1.09545	0.78216	0.418248	0.102384	-0.0298133	0.0714856	0.460025	0.984231	1.40284	1.62743	1.63538	1.51174	1.31855	1.14277	1.03796	0.946894	0.916172
1.03585	0.830556	0.669039	0.477341	0.347623	0.306138	0.304694	0.249215	0.115471	-0.00799601	-0.109749	-0.0663185	0.0881888	0.301519	0.510347	0.758961	1.01221	1.20712	1.23262	1.08627	0.774874	0.413161	0.0992061	-0.0321916	0.0684949	0.454686	0.975723	1.3918	1.61504	1.62294	1.50004	1.30802	1.13331	1.02913	0.938612	0.908075	0.953083	1.03997	1.07603	0.96818	0.667625	0.176132	-0.352939	-0.695828	-0.820862	-0.800235	-0.700871	-0.545374	-0.431662	-0.333325
-1.0057	-0.898406	-0.768125	-0.681868	-0.605291	-0.492707	-0.335771	-0.176483	-0.0654336	-0.079588	-0.245284	-0.533124	-0.770765	-0.891124	-0.869231	-0.676829	-0.396505	-0.0704943	0.216766	0.437671	0.55057	0.635672	0.699525	0.742261	0.797209	0.82709	0.941898	1.11677	1.33392	1.55337	1.70519	1.75231	1.64383	1.39603	1.07274	0.702808	0.388283	0.152917	0.00646975	-0.037652	0.00498287	0.065757	0.0853481	0.0532253	0.0280881	0.0528207	0.0946476	0.203725	0.310022	0.357162
0.114726	0.0908613	0.028583	-0.0875972	-0.168073	-0.193287	-0.181825	-0.135044	-0.0760133	-0.033373	0.0428079	0.115118	0.135795	0.0601377	-0.0735604	-0.216472	-0.261028	-0.164144	0.0423854	0.276079	0.468369	0.627257	0.72418	0.778764	0.846226	1.02629	1.30944	1.67368	2.00766	2.20621	2.22516	2.017	1.69359	1.41188	1.25329	1.14317	0.981945	0.755721	0.455632	0.133295	-0.105811	-0.217851	-0.265803	-0.226681	-0.165862	-0.0911342	-0.0363565	-0.0520143	-0.10635	-0.194233
-0.187428	-0.154336	-0.0891663	-0.0400904	0.0111165	0.024161	0.0175608	-0.012113	-0.00280705	0.0383674	0.12116	0.18151	0.237227	0.332139	0.472001	0.58287	0.637417	0.628769	0.509896	0.362265	0.211297	0.085405	-0.0189963	-0.0427631	-0.010054	0.0340427	0.000138429	-0.0675389	-0.0861694	-0.0195563	0.20103	0.440577	0.562232	0.577891	0.465883	0.294237	0.101513	-0.133506	-0.366306	-0.597073	-0.79033	-0.90486	-0.952947	-0.97722	-0.926259	-0.821069	-0.73682	-0.69397	-0.716456	-0.775942
1.24536	1.14081	0.963975	0.821442	0.706243	0.724153	0.909505	1.16213	1.36197	1.46126	1.40623	1.38322	1.43371	1.56579	1.69354	1.63869	1.45246	1.16555	0.936815	0.806459	0.774166	0.810211	0.881342	0.893507	0.855148	0.849558	0.924848	1.16618	1.51434	1.81435	1.94277	1.89192	1.71932	1.53099	1.40997	1.3852	1.40372	1.32953	1.0943	0.686283	0.194422	-0.19426	-0.40209	-0.408423	-0.323959	-0.294524	-0.292186	-0.273915	-0.190811	-0.0390806
0.150018	0.0765063	-0.0461702	-0.119995	-0.140356	-0.154945	-0.179805	-0.149309	0.0350704	0.319905	0.585338	0.79722	0.817641	0.660427	0.388805	0.131253	-0.0991584	-0.287161	-0.460406	-0.556864	-0.54558	-0.402695	-0.135399	0.226255	0.615311	0.944224	1.04467	0.849064	0.344411	-0.269475	-0.758387	-0.954413	-0.818565	-0.4476	-0.0747937	0.139438	0.182907	0.0763673	-0.0884688	-0.152185	-0.10296	-0.0563104	-0.0737267	-0.161286	-0.324845	-0.464976	-0.573691	-0.718432	-0.723291	-0.661928
0.282212	0.435226	0.537493	0.634442	0.720088	0.848038	1.00492	1.10698	1.09275	0.967436	0.737455	0.504399	0.356327	0.254013	0.254294	0.28136	0.30482	0.359508	0.421082	0.45557	0.460605	0.440389	0.405361	0.423185	0.489696	0.607263	0.652138	0.56593	0.390995	0.253686	0.199904	0.315498	0.582993	0.865104	1.0531	1.06576	0.928191	0.686399	0.425847	0.221668	0.124248	0.162	0.291667	0.472268	0.64793	0.780322	0.7934	0.670818	0.511856	0.355706
-0.281639	-0.153102	0.00908454	0.185667	0.248515	0.153196	-0.0560366	-0.220265	-0.284592	-0.146334	0.173604	0.511023	0.735879	0.751024	0.586479	0.297282	-0.0143509	-0.25856	-0.375079	-0.329926	-0.174837	0.0411712	0.251272	0.409619	0.425262	0.278647	0.0885196	-0.0982431	-0.138108	-0.0918228	0.0812311	0.327296	0.554644	0.675943	0.671413	0.511127	0.218252	-0.0764207	-0.387286	-0.634804	-0.81436	-0.957956	-0.997539	-0.972429	-0.879713	-0.731568	-0.628905	-0.679432	-0.862302	-1.15635
0.384348	0.496372	0.595514	0.634299	0.58743	0.404066	0.0971055	-0.211739	-0.537556	-0.796979	-0.985171	-1.13567	-1.17716	-1.15084	-1.05367	-0.898396	-0.790796	-0.843753	-1.03542	-1.34361	-1.61097	-1.73463	-1.67012	-1.4047	-0.981866	-0.484773	-0.0787371	0.141309	0.20489	0.169561	0.142252	0.203185	0.419436	0.654737	0.807601	0.755463	0.463346	-0.0102686	-0.558243	-1.02776	-1.37056	-1.59301	-1.66739	-1.59738	-1.43071	-1.1673	-0.862885	-0.606992	-0.386395	-0.324385
-0.85287	-0.950964	-1.04977	-1.14303	-1.16603	-1.10485	-0.969275	-0.755019	-0.507408	-0.299266	-0.119833	-0.069394	-0.0657956	-0.0397663	-0.00165131	0.0106305	-0.0147792	-0.101839	-0.207692	-0.21533	-0.0995987	0.0712911	0.194592	0.217188	0.187218	0.122153	0.0804936	0.115424	0.252604	0.379701	0.537289	0.712562	0.910203	1.03863	0.993402	0.752408	0.326848	-0.18304	-0.640086	-0.892126	-0.933402	-0.785745	-0.610431	-0.433586	-0.325903	-0.271279	-0.288012	-0.355146	-0.443809	-0.583938
0.257156	0.256931	0.191868	0.144799	0.151739	0.187399	0.199828	0.174114	0.0860115	-0.0211099	-0.0288388	0.0882784	0.261215	0.385993	0.40886	0.378531	0.312686	0.270528	0.305876	0.4447	0.573319	0.732795	0.910168	1.11018	1.24014	1.19437	0.950491	0.519834	0.0038378	-0.458683	-0.713742	-0.755512	-0.606087	-0.428673	-0.249709	-0.140736	-0.0854586	-0.102391	-0.17033	-0.260055	-0.401863	-0.550329	-0.755037	-0.962677	-1.0982	-1.14937	-1.06789	-0.943608	-0.784149	-0.629204
-0.17315	-0.368523	-0.498092	-0.552335	-0.494322	-0.394762	-0.310961	-0.272713	-0.266681	-0.282278	-0.321644	-0.377116	-0.470616	-0.539642	-0.57897	-0.540507	-0.418543	-0.224964	-0.0327894	0.114014	0.191539	0.206248	0.187849	0.154492	0.150579	0.177216	0.239685	0.288785	0.331582	0.332763	0.324774	0.329505	0.356309	0.354321	0.310081	0.248983	0.143674	0.0529724	-0.0630557	-0.143461	-0.171014	-0.203578	-0.279296	-0.41264	-0.572086	-0.696614	-0.774369	-0.723643	-0.594958	-0.468071
0.159765	0.0655128	-0.0234444	-0.0803456	-0.122847	-0.174026	-0.234082	-0.33531	-0.410041	-0.452619	-0.410978	-0.278934	-0.069355	0.138702	0.297639	0.381572	0.397495	0.377577	0.341462	0.337226	0.366064	0.433696	0.486855	0.533188	0.534467	0.525818	0.53094	0.559959	0.557807	0.50991	0.443762	0.32975	0.231552	0.105935	0.0188838	-0.0109461	-0.0462019	-0.128178	-0.272542	-0.445166	-0.579987	-0.664168	-0.609249	-0.469929	-0.332555	-0.22917	-0.13972	-0.0423457	0.0627441	0.189695
-0.0530324	-0.0985402	-0.149866	-0.252375	-0.331248	-0.372649	-0.325175	-0.174634	0.0643035	0.301506	0.482707	0.578397	0.596552	0.573843	0.532669	0.52784	0.560717	0.637824	0.698429	0.751252	0.75271	0.74285	0.748689	0.781773	0.77932	0.724714	0.6493	0.519317	0.407363	0.264148	0.164903	0.130895	0.0907	-0.0027596	-0.167347	-0.364152	-0.517859	-0.613833	-0.55122	-0.392384	-0.235766	-0.117899	-0.0159186	0.0950963	0.214907	0.359642	0.527832	0.718289	0.903178	1.10689
-0.942982	-0.95564	-0.968028	-0.935585	-0.904347	-0.898052	-0.82279	-0.668364	-0.419936	-0.131298	0.167414	0.416094	0.548724	0.523437	0.395146	0.168845	-0.135979	-0.381352	-0.502721	-0.452835	-0.277201	-0.0348673	0.116639	0.0883958	-0.0836112	-0.380854	-0.699279	-0.993235	-1.16184	-1.1826	-1.07103	-0.824135	-0.545897	-0.349853	-0.262954	-0.31335	-0.465848	-0.61307	-0.707284	-0.758534	-0.77833	-0.734173	-0.60455	-0.376578	-0.112822	0.165397	0.423122	0.559108	0.57097	0.49892
-1.10677	-1.02659	-0.913439	-0.755356	-0.505336	-0.246032	-0.0621648	0.019336	-0.0279297	-0.170956	-0.309033	-0.397396	-0.445463	-0.464029	-0.422614	-0.301043	-0.0872304	0.160143	0.421082	0.662799	0.790339	0.801464	0.733889	0.695009	0.648266	0.636139	0.570319	0.46133	0.345203	0.296278	0.404853	0.588919	0.73843	0.772896	0.726891	0.602346	0.461269	0.326363	0.223082	0.0735763	-0.118125	-0.348556	-0.565322	-0.707337	-0.710751	-0.644772	-0.571984	-0.556296	-0.595696	-0.639523
0.920967	1.04459	1.10988	1.11195	1.06768	0.963941	0.88546	0.861092	0.850668	0.833156	0.788714	0.706437	0.666158	0.629054	0.684225	0.78163	0.805528	0.762807	0.603497	0.451018	0.345611	0.313004	0.273547	0.224265	0.113643	0.0489863	0.115443	0.301546	0.576046	0.799067	0.89165	0.885868	0.802539	0.658561	0.459947	0.287595	0.180759	0.122838	0.109255	0.150325	0.131083	0.0386087	-0.123092	-0.263428	-0.295568	-0.234248	-0.174133	-0.147211	-0.208629	-0.2906
0.950401	0.835203	0.768255	0.753368	0.748978	0.729054	0.687036	0.609245	0.571163	0.536083	0.588245	0.680338	0.702933	0.662542	0.511919	0.367756	0.268098	0.237269	0.199963	0.153369	0.0487798	-0.0123507	0.050482	0.226435	0.485966	0.696824	0.784358	0.778891	0.700107	0.56398	0.376198	0.213246	0.112235	0.0574736	0.0446314	0.0834617	0.0652685	-0.0221623	-0.175045	-0.307727	-0.338115	-0.280138	-0.223302	-0.197848	-0.255916	-0.333417	-0.337815	-0.259586	-0.109933	0.0113375
-0.257592	-0.105287	-0.0828393	-0.146647	-0.285668	-0.411014	-0.441022	-0.38377	-0.327644	-0.302508	-0.359851	-0.436384	-0.440726	-0.363474	-0.215691	-0.0959356	-0.0964771	-0.204069	-0.383819	-0.531696	-0.530644	-0.333874	-0.0236623	0.332997	0.60344	0.715979	0.720865	0.666822	0.590138	0.487654	0.46274	0.502129	0.575878	0.601775	0.581648	0.5248	0.448704	0.398869	0.351238	0.312379	0.297591	0.321652	0.397106	0.50956	0.640404	0.722817	0.695407	0.628739	0.579026	0.594537
0.21959	0.228017	0.20839	0.176309	0.168538	0.193205	0.273309	0.392695	0.531605	0.619098	0.589998	0.51922	0.466443	0.48291	0.6009	0.767208	0.985675	1.09081	1.04441	0.893189	0.655065	0.381744	0.175143	0.115135	0.227942	0.440723	0.587013	0.605647	0.448992	0.197006	-0.00940716	-0.0769472	-0.0400539	0.0977454	0.265487	0.386441	0.4311	0.338282	0.175665	0.0102516	-0.181905	-0.409631	-0.631599	-0.774046	-0.812969	-0.69481	-0.508185	-0.357106	-0.292813	-0.314655
1.23456	1.07835	0.828	0.447125	0.0126709	-0.373854	-0.622337	-0.710561	-0.666023	-0.525923	-0.365036	-0.244683	-0.198449	-0.177242	-0.160176	-0.101187	0.0210987	0.172372	0.286459	0.348644	0.461069	0.593295	0.725121	0.800092	0.797261	0.734034	0.650544	0.597695	0.599379	0.692357	0.843055	1.06808	1.27201	1.40436	1.37367	1.20762	0.95667	0.710814	0.56973	0.520654	0.500759	0.401391	0.215907	-0.0281174	-0.281971	-0.429581	-0.458236	-0.415207	-0.322734	-0.199821
0.164686	0.381168	0.563954	0.71304	0.794777	0.791877	0.730165	0.648678	0.597096	0.59874	0.689488	0.836572	1.0562	1.25524	1.38442	1.35446	1.1924	0.947462	0.707502	0.569802	0.521903	0.502485	0.4055	0.224464	-0.0137075	-0.261474	-0.405543	-0.433511	-0.391514	-0.301258	-0.181293	0.0331968	0.30218	0.567661	0.724765	0.760153	0.670974	0.561345	0.505464	0.53374	0.575136	0.605013	0.549063	0.4523	0.372913	0.302115	0.271084	0.236925	0.175136	0.134383
0.242738	0.0858334	-0.112932	-0.337238	-0.570489	-0.701876	-0.729427	-0.688056	-0.599147	-0.480971	-0.26968	-0.00470892	0.256811	0.411572	0.446433	0.358584	0.25059	0.195542	0.223397	0.264175	0.293607	0.238491	0.143171	0.0649687	-0.00477387	-0.0353418	-0.0689909	-0.129858	-0.170004	-0.146318	-0.0337056	0.135763	0.29722	0.356222	0.34446	0.275629	0.231181	0.222859	0.274958	0.360776	0.445443	0.543868	0.595975	0.635204	0.625971	0.572714	0.468	0.320789	0.184088	0.112827
-0.102732	-0.0962252	-0.14599	-0.164287	-0.219271	-0.307537	-0.332649	-0.269223	-0.169026	-0.0197205	0.0837579	0.0647858	-0.0861376	-0.258903	-0.377332	-0.376416	-0.25191	-0.090519	0.0676192	0.133626	0.254026	0.557854	1.11057	1.77612	2.41404	2.75874	2.76364	2.58021	2.39132	2.2572	2.16917	2.10475	1.98802	1.74278	1.4632	1.25608	1.17726	1.19148	1.20076	1.20895	1.08637	0.888276	0.677515	0.487662	0.339779	0.304074	0.284498	0.25876	0.205423	0.136451
0.619406	0.769432	0.919814	1.11649	1.38098	1.71481	2.12531	2.5139	2.80095	2.93205	2.89568	2.74606	2.54302	2.42195	2.45484	2.6119	2.74375	2.78747	2.66762	2.40212	2.13743	1.95974	1.93377	2.04919	2.27366	2.52566	2.68661	2.6814	2.53436	2.3328	2.09151	1.92614	1.92232	2.04998	2.17857	2.15996	2.00067	1.72602	1.34897	0.969947	0.704015	0.532573	0.41077	0.309465	0.26542	0.212532	0.195871	0.230594	0.319786	0.441445
0.309267	0.39428	0.466864	0.492258	0.461536	0.380852	0.288951	0.260733	0.348271	0.505649	0.636112	0.654445	0.546635	0.364395	0.135781	-0.0334772	-0.0641359	0.0273051	0.248807	0.539728	0.836904	1.07753	1.17128	1.11635	1.04132	0.954557	0.937593	0.930234	0.92479	0.809415	0.668745	0.530118	0.42877	0.426016	0.474422	0.545593	0.60205	0.605902	0.572504	0.489682	0.322384	0.0906377	-0.169031	-0.460161	-0.721971	-0.9301	-1.05569	-1.09751	-1.08141	-1.04693
-0.0166004	-0.0622537	-0.0514474	0.00461193	0.090506	0.117348	0.110481	0.0953544	0.0992697	0.131391	0.143469	0.125117	0.0649855	-0.0348961	-0.153898	-0.218356	-0.23948	-0.228697	-0.189598	-0.0906192	0.0362622	0.12481	0.188083	0.183385	0.185912	0.198344	0.24758	0.335043	0.398726	0.406641	0.344029	0.277128	0.209803	0.141817	0.0543399	-0.139256	-0.391106	-0.633231	-0.78952	-0.841536	-0.796048	-0.710319	-0.602265	-0.477814	-0.354867	-0.278053	-0.362209	-0.537374	-0.7427	-0.907323
-0.202846	-0.108526	0.0282951	0.189408	0.334694	0.477841	0.625878	0.758621	0.887339	0.951266	0.919846	0.843152	0.768221	0.642944	0.507423	0.368267	0.26983	0.219197	0.19388	0.204393	0.238445	0.290733	0.357225	0.392267	0.399393	0.370979	0.356807	0.326551	0.265934	0.168885	0.0810918	0.103579	0.221247	0.380332	0.435663	0.31759	-0.0437605	-0.510924	-1.01243	-1.41012	-1.65281	-1.71165	-1.67328	-1.60098	-1.57564	-1.56232	-1.51439	-1.42334	-1.28042	-1.07207
-0.263202	-0.110121	-0.0134769	0.0162545	-0.0147629	-0.0322194	-0.0683502	-0.156298	-0.270204	-0.426322	-0.605831	-0.734824	-0.745114	-0.686384	-0.599927	-0.560811	-0.613226	-0.729648	-0.838962	-0.872585	-0.860744	-0.831039	-0.780493	-0.731554	-0.726495	-0.773703	-0.915718	-1.09237	-1.28232	-1.47707	-1.59289	-1.63268	-1.61567	-1.55888	-1.50901	-1.50207	-1.52723	-1.60428	-1.68405	-1.76363	-1.88295	-2.00299	-2.11446	-2.18908	-2.20528	-2.15445	-2.01195	-1.71804	-1.34753	-0.995524
0.978918	1.06534	1.11244	1.15589	1.18912	1.2319	1.30427	1.36313	1.37144	1.40912	1.44446	1.43847	1.37559	1.27235	1.13265	0.939803	0.74762	0.602885	0.526246	0.588752	0.738303	0.947466	1.14565	1.28615	1.44109	1.61298	1.77756	1.98216	2.17119	2.32897	2.35505	2.23939	1.99376	1.66271	1.32707	1.1139	1.0734	1.19648	1.44364	1.7575	2.00114	2.04466	1.94242	1.75489	1.6071	1.53675	1.55437	1.63368	1.677	1.61614
-0.378212	-0.508967	-0.629111	-0.748635	-0.890822	-1.05226	-1.22869	-1.33047	-1.32548	-1.17429	-0.946568	-0.754276	-0.644902	-0.624757	-0.632465	-0.741	-0.919085	-1.12663	-1.25335	-1.25282	-1.16249	-1.09006	-1.02388	-0.97954	-0.971571	-0.978061	-0.981778	-0.985451	-0.978381	-0.94404	-0.826248	-0.602705	-0.327361	-0.0712232	0.0731259	0.0326668	-0.155491	-0.384782	-0.609341	-0.871634	-1.11418	-1.32514	-1.43288	-1.36498	-1.20729	-0.957623	-0.768296	-0.658105	-0.649306	-0.658743
-0.416814	-0.475825	-0.526178	-0.548264	-0.562712	-0.561048	-0.530995	-0.42791	-0.232278	0.00868712	0.232845	0.359171	0.323763	0.159098	-0.0415643	-0.238086	-0.46763	-0.679889	-0.864513	-0.958805	-0.899377	-0.761376	-0.542882	-0.377194	-0.280761	-0.273061	-0.281319	-0.31357	-0.34281	-0.352409	-0.285607	-0.120313	0.0671251	0.247892	0.365492	0.38083	0.358311	0.296612	0.23694	0.164724	0.0877309	0.0278875	0.0128979	0.0151264	0.0169851	0.019974	-0.00724175	-0.08187	-0.178268	-0.295245
0.167538	0.337894	0.372421	0.297468	0.0940508	-0.163877	-0.339494	-0.409866	-0.373157	-0.271389	-0.199147	-0.191774	-0.206675	-0.191357	-0.121298	0.0316904	0.175603	0.291595	0.276617	0.182847	0.081659	0.0195287	0.065616	0.198966	0.394595	0.515807	0.55569	0.518991	0.462134	0.353192	0.267121	0.269158	0.362648	0.576258	0.837934	1.08925	1.2464	1.28984	1.25015	1.20212	1.1221	1.01923	0.895711	0.731377	0.561594	0.426935	0.33899	0.322244	0.330664	0.363929
0.960629	1.0706	1.20234	1.3527	1.48086	1.53852	1.55578	1.55151	1.56315	1.54235	1.50357	1.45264	1.43815	1.45562	1.46082	1.42551	1.35172	1.26803	1.17974	1.13934	1.10909	1.03716	0.930983	0.824073	0.709513	0.58005	0.466098	0.42661	0.515169	0.699995	0.906986	1.05623	1.11098	1.08507	1.04651	0.935212	0.752156	0.623286	0.56942	0.662535	0.885123	1.15941	1.33807	1.38052	1.26889	1.10766	0.993014	0.904675	0.893085	0.926404
-0.420101	-0.185555	-0.0161562	0.0780528	0.0123527	-0.0744387	-0.129271	-0.13967	-0.0993228	-0.0590727	-0.0211993	0.0331452	0.184098	0.399416	0.646527	0.779112	0.750003	0.586099	0.385197	0.205431	0.0876636	0.0565497	0.11918	0.29968	0.528005	0.670791	0.752285	0.720284	0.663728	0.641505	0.678667	0.859461	1.11963	1.43261	1.70099	1.88912	1.94355	1.86436	1.72605	1.59231	1.53522	1.55324	1.6173	1.71262	1.76391	1.78266	1.81686	1.87975	1.95039	1.97126
0.957057	1.04507	1.18165	1.34909	1.45668	1.44924	1.31232	1.07354	0.802813	0.511602	0.307564	0.22969	0.296344	0.459311	0.671839	0.897584	1.06854	1.23105	1.37433	1.4795	1.53347	1.49307	1.39071	1.27689	1.17051	1.06514	0.971354	0.911582	0.885442	0.896087	0.89812	0.876262	0.820805	0.759215	0.71291	0.705722	0.736759	0.794627	0.864349	0.898747	0.861352	0.754561	0.677431	0.637684	0.66162	0.714129	0.783761	0.796682	0.775024	0.735829
-0.557682	-0.393415	-0.263431	-0.267374	-0.400725	-0.638189	-0.902107	-1.11085	-1.24181	-1.30832	-1.33913	-1.32031	-1.25624	-1.15305	-1.02113	-0.862715	-0.739324	-0.681078	-0.694743	-0.741758	-0.812978	-0.838406	-0.786109	-0.674408	-0.600534	-0.582984	-0.624428	-0.761581	-0.95801	-1.14117	-1.26192	-1.21252	-0.989643	-0.627154	-0.289339	-0.112361	-0.0808495	-0.118745	-0.213035	-0.269815	-0.31433	-0.346941	-0.303426	-0.226211	-0.0651069	0.119055	0.248407	0.262215	0.214885	0.165097
-0.000935075	-0.0137726	-0.0434078	-0.0879831	-0.197852	-0.35399	-0.500172	-0.635687	-0.71026	-0.672627	-0.501522	-0.237615	0.0202007	0.196823	0.275942	0.241745	0.202737	0.116999	0.0543669	-0.0111554	-0.0786044	-0.0851199	0.0025336	0.174887	0.437713	0.715259	0.945196	1.18292	1.40717	1.65121	1.86416	1.95098	1.9036	1.69685	1.40844	1.20384	1.17158	1.29593	1.47973	1.64868	1.78818	1.86451	1.92974	1.89872	1.78823	1.53335	1.20975	0.889397	0.625042	0.48831
0.189411	0.186728	0.251193	0.404866	0.645395	0.994113	1.35947	1.66215	1.97508	2.27029	2.59153	2.87186	2.98615	2.92377	2.65161	2.27195	2.00263	1.96016	2.12385	2.3658	2.5882	2.77184	2.87232	2.95819	2.91735	2.77191	2.43639	2.01041	1.5887	1.24071	1.06072	1.01603	1.14796	1.38442	1.67575	1.93799	2.10358	2.11456	1.94255	1.75492	1.62657	1.73314	1.9676	2.13179	2.08501	1.84136	1.43111	1.05484	0.893007	0.935586
-1.22744	-1.27158	-1.27436	-1.19388	-1.01463	-0.73783	-0.44854	-0.29012	-0.281269	-0.335646	-0.414137	-0.411382	-0.325926	-0.190049	-0.136654	-0.183039	-0.226273	-0.25428	-0.240558	-0.219493	-0.231249	-0.288563	-0.393919	-0.464832	-0.431374	-0.257253	-0.021936	0.171142	0.244008	0.183505	0.0428616	-0.100921	-0.202611	-0.275738	-0.324306	-0.342006	-0.267799	-0.0709733	0.251375	0.541422	0.735605	0.700756	0.433235	0.0723782	-0.291407	-0.558782	-0.707299	-0.704131	-0.68112	-0.652893
-0.319647	-0.481458	-0.69401	-0.974133	-1.25937	-1.54056	-1.70472	-1.70336	-1.56104	-1.40906	-1.33369	-1.35306	-1.4255	-1.48128	-1.47837	-1.43054	-1.29859	-1.14212	-0.967165	-0.764851	-0.627789	-0.630178	-0.783176	-1.03426	-1.21799	-1.24649	-1.07068	-0.729708	-0.336149	0.0133606	0.236832	0.311735	0.319121	0.324428	0.328547	0.309742	0.225714	0.0790145	-0.03811	-0.100216	-0.0467496	0.0394906	0.0726933	0.0671527	0.0573938	0.051109	0.0558598	0.0467998	-0.0496137	-0.141498
0.948934	0.94212	0.896595	0.800699	0.655647	0.54354	0.486161	0.535558	0.615234	0.645909	0.640791	0.631774	0.625968	0.630357	0.621987	0.532912	0.448021	0.433897	0.462745	0.566464	0.647142	0.636746	0.58431	0.553793	0.566461	0.657076	0.716625	0.722804	0.696817	0.686813	0.751151	0.853126	0.974408	1.02231	1.01458	0.965107	0.901431	0.800241	0.657835	0.50303	0.405077	0.337756	0.312478	0.34632	0.371572	0.374974	0.356265	0.330526	0.302059	0.259365
-0.292611	-0.321763	-0.301424	-0.275502	-0.190829	-0.125146	-0.0948747	-0.168287	-0.337887	-0.529725	-0.688905	-0.744813	-0.717244	-0.616436	-0.477048	-0.327333	-0.213032	-0.124854	-0.0531891	0.00406415	0.0233968	0.0427296	0.0102288	-0.0354837	-0.0490542	0.054897	0.218807	0.432246	0.646188	0.800969	0.884274	0.849644	0.799849	0.740425	0.693669	0.686704	0.7105	0.721101	0.714208	0.700325	0.69173	0.701305	0.62737	0.554291	0.417408	0.239643	0.109593	0.063159	0.086647	0.162899
1.25799	1.16046	1.11222	1.13226	1.26161	1.42243	1.52193	1.56077	1.55032	1.52408	1.48996	1.39857	1.26082	1.1108	0.968113	0.913048	0.933886	0.904895	0.762208	0.428863	0.0572113	-0.219019	-0.279378	-0.176228	0.0900437	0.380387	0.613499	0.764002	0.846413	0.983664	1.14179	1.22414	1.18102	0.935392	0.533102	0.0670238	-0.332476	-0.590968	-0.684894	-0.644484	-0.599011	-0.545311	-0.516152	-0.485888	-0.442576	-0.371365	-0.296578	-0.22712	-0.172209	-0.140061
-0.354774	-0.474119	-0.572178	-0.634899	-0.601231	-0.534239	-0.441517	-0.409368	-0.381651	-0.360026	-0.268353	-0.136239	-0.00644635	0.0561366	0.0136079	-0.078725	-0.254343	-0.406796	-0.430304	-0.312594	-0.0231875	0.333757	0.632968	0.815094	0.878947	0.822253	0.726725	0.626281	0.576274	0.572995	0.602296	0.716785	0.946277	1.22073	1.46997	1.51861	1.39015	1.13558	0.844513	0.642119	0.507174	0.438917	0.388838	0.351207	0.28794	0.267969	0.277004	0.283402	0.260928	0.16425
-0.471324	-0.417331	-0.354328	-0.292892	-0.237653	-0.147708	-0.05594	0.0835218	0.288991	0.584286	0.907797	1.15303	1.26908	1.2399	1.12462	0.978625	0.865684	0.858881	0.890383	0.885875	0.819433	0.704799	0.615946	0.632466	0.70627	0.805684	0.92765	1.09249	1.31186	1.49889	1.56251	1.58974	1.51279	1.43259	1.3228	1.19363	1.08498	1.09985	1.1949	1.28328	1.34869	1.33788	1.37712	1.44527	1.51516	1.54021	1.57224	1.61436	1.75908	1.96696
0.102887	0.111086	0.200417	0.376369	0.65539	0.975138	1.22426	1.34214	1.3125	1.19539	1.04709	0.932358	0.925447	0.957448	0.952868	0.885374	0.768926	0.678666	0.695447	0.770419	0.871407	0.995305	1.16275	1.3856	1.57559	1.64022	1.66788	1.58971	1.50824	1.39671	1.2655	1.15513	1.17023	1.26679	1.35656	1.42301	1.41203	1.45189	1.52112	1.59212	1.61757	1.6501	1.69289	1.8399	2.05107	2.20787	2.20707	1.98959	1.70382	1.42463
1.57554	1.42329	1.34517	1.22876	1.14565	1.04543	0.928809	0.83071	0.844133	0.929957	1.00974	1.0688	1.05904	1.09447	1.15601	1.2191	1.24173	1.27064	1.30867	1.43933	1.62702	1.76638	1.76567	1.57238	1.31839	1.07024	0.880052	0.752658	0.612852	0.462478	0.264143	0.0841778	0.00433304	-0.0514972	-0.0917642	-0.145949	-0.191684	-0.200388	-0.150754	-0.0674796	0.045438	0.111291	0.118846	0.0415699	-0.0977875	-0.223832	-0.328243	-0.35839	-0.285577	-0.135121
0.527442	0.520387	0.502547	0.476494	0.400065	0.275413	0.126338	0.0169506	-0.0624926	-0.128931	-0.230185	-0.328242	-0.355161	-0.269716	-0.0512959	0.179109	0.339476	0.35626	0.248996	0.0969558	-0.0130276	-0.0863625	-0.134748	-0.211248	-0.262697	-0.242103	-0.134	0.0271016	0.173944	0.290782	0.395583	0.512748	0.693365	0.897169	1.10691	1.29293	1.44081	1.51524	1.52468	1.38987	1.17859	0.970307	0.839087	0.822666	0.862085	0.846034	0.794171	0.702159	0.578404	0.492911
-0.00477435	-0.158606	-0.283817	-0.397746	-0.487419	-0.563662	-0.652787	-0.727589	-0.827954	-0.891097	-0.918101	-0.939134	-0.942145	-0.922651	-0.847687	-0.748152	-0.629262	-0.499967	-0.363998	-0.313117	-0.306098	-0.385784	-0.531548	-0.677876	-0.727574	-0.610769	-0.448989	-0.336813	-0.389607	-0.528078	-0.716353	-0.807259	-0.820492	-0.795688	-0.822267	-0.907099	-1.0078	-1.05894	-1.04956	-0.982052	-0.873401	-0.728089	-0.632246	-0.627176	-0.700212	-0.865444	-1.04716	-1.16079	-1.19664	-1.1518
-0.376966	-0.187207	0.0118791	0.166227	0.271161	0.226349	0.060209	-0.199717	-0.509903	-0.765104	-0.899591	-0.872141	-0.752474	-0.649981	-0.634663	-0.683748	-0.768959	-0.764793	-0.605881	-0.350967	-0.0881369	0.14851	0.355278	0.535961	0.725907	0.884784	1.00556	1.10144	1.14234	1.13127	1.10403	1.07525	1.03054	1.0357	1.00447	0.95441	0.881599	0.772729	0.659965	0.60756	0.515702	0.402353	0.308013	0.29685	0.357602	0.41857	0.390472	0.236893	0.0324144	-0.0476264
0.612749	0.517201	0.483862	0.395985	0.282116	0.182427	0.170937	0.233467	0.296219	0.267298	0.109226	-0.101235	-0.183618	-0.0966632	0.0986594	0.356632	0.548335	0.645655	0.638891	0.53935	0.449956	0.418518	0.391095	0.334393	0.173172	-0.0939405	-0.327456	-0.421654	-0.379255	-0.197181	-0.0371128	0.0708036	0.141102	0.207166	0.34115	0.54933	0.792587	0.97956	1.08859	1.09616	1.04875	0.97009	0.929221	0.943054	0.943431	0.980576	0.988933	0.985387	0.959081	0.880493
0.662171	0.50415	0.334357	0.204383	0.183801	0.234321	0.296585	0.26789	0.111047	-0.0977775	-0.179519	-0.093241	0.100562	0.356528	0.546741	0.643303	0.636592	0.537826	0.449127	0.417933	0.390723	0.334463	0.174495	-0.0905395	-0.322238	-0.415704	-0.373635	-0.192977	-0.0341538	0.0729232	0.142674	0.208225	0.341167	0.547728	0.789093	0.974611	1.08279	1.0903	1.04326	0.965215	0.924664	0.938389	0.938763	0.975619	0.983911	0.980393	0.954291	0.876314	0.834408	0.823722
1.24536	1.3455	1.31448	1.15751	0.926985	0.718872	0.547536	0.413209	0.294453	0.187761	0.131284	0.125196	0.164891	0.17021	0.152345	0.078463	-0.0406476	-0.220668	-0.411567	-0.60739	-0.703221	-0.685482	-0.592341	-0.44059	-0.250857	0.00107235	0.180164	0.284208	0.351952	0.485954	0.622007	0.705649	0.632277	0.412087	0.143898	-0.0595911	-0.101583	-0.0469344	0.0929737	0.190044	0.137858	0.0253022	-0.147426	-0.307645	-0.440358	-0.50309	-0.479941	-0.400076	-0.300101	-0.171392
-0.175788	-0.341635	-0.479726	-0.54733	-0.529761	-0.46004	-0.36166	-0.235004	-0.15435	-0.178747	-0.304401	-0.456454	-0.630132	-0.753114	-0.817207	-0.749116	-0.59137	-0.443622	-0.351369	-0.352354	-0.431636	-0.560449	-0.669595	-0.734253	-0.715044	-0.636115	-0.559261	-0.520846	-0.51527	-0.508147	-0.415483	-0.210496	0.100197	0.369163	0.495479	0.429097	0.261675	0.142931	0.155016	0.217735	0.290591	0.345532	0.408315	0.526136	0.644347	0.678772	0.625456	0.494627	0.343191	0.256815
-0.350292	-0.372055	-0.319235	-0.227775	-0.117558	0.0258325	0.116018	0.113215	0.0264541	-0.112292	-0.245395	-0.343864	-0.385799	-0.381927	-0.334312	-0.299673	-0.316262	-0.396768	-0.490561	-0.555852	-0.597367	-0.628762	-0.638425	-0.590525	-0.464055	-0.298006	-0.145333	-0.0508414	-0.0705537	-0.184429	-0.279935	-0.350856	-0.452591	-0.573335	-0.666899	-0.714768	-0.707967	-0.703691	-0.690765	-0.701236	-0.695642	-0.606234	-0.473364	-0.388019	-0.435176	-0.523485	-0.568005	-0.610639	-0.657536	-0.783122
0.550323	0.595986	0.594694	0.495153	0.314345	0.17869	0.0837251	-0.0525009	-0.21418	-0.339464	-0.403563	-0.394456	-0.38873	-0.371422	-0.385442	-0.377953	-0.258232	-0.0803162	0.0339623	-0.0291809	-0.14743	-0.207043	-0.264131	-0.326927	-0.495091	-0.68289	-0.85799	-0.886998	-0.717715	-0.433869	-0.169681	-0.00234248	0.0697534	0.0978085	0.123392	0.164181	0.192767	0.190018	0.11836	0.00873433	-0.0841654	-0.0978899	-0.0785566	-0.0649546	-0.132161	-0.288995	-0.473375	-0.684125	-0.877913	-1.00559
0.719714	0.768853	0.77766	0.770789	0.772563	0.791722	0.810579	0.757657	0.690169	0.649881	0.656842	0.666171	0.551335	0.313648	0.0601221	-0.0762425	-0.0185087	0.184536	0.499082	0.801787	0.957551	0.953575	0.824216	0.689887	0.596	0.520153	0.499054	0.445978	0.34728	0.199936	0.00836781	-0.238255	-0.439713	-0.546307	-0.544247	-0.393754	-0.193745	0.0259668	0.234326	0.461196	0.566057	0.551302	0.419407	0.227881	0.0421083	-0.0271055	-0.0515365	-0.036545	-0.0669821	-0.0682418
-0.555425	-0.284221	-0.00576804	0.266423	0.378675	0.329653	0.0914576	-0.162634	-0.318578	-0.356706	-0.277693	-0.262159	-0.390694	-0.616943	-0.845376	-1.02829	-1.0696	-0.980719	-0.720386	-0.307048	0.223982	0.708126	1.01826	1.06271	0.958532	0.864072	0.886583	0.950255	0.912929	0.779858	0.608284	0.47576	0.413022	0.413803	0.40246	0.352818	0.266509	0.250383	0.307975	0.370824	0.38131	0.306856	0.147638	-0.0389056	-0.142565	-0.111315	-0.0144712	0.0356412	0.0296519	-0.0610712
0.71812	0.685648	0.710647	0.812362	0.905388	0.888788	0.775053	0.62841	0.515143	0.461521	0.462189	0.452494	0.410065	0.336298	0.322515	0.371738	0.425455	0.434417	0.370782	0.2347	0.0752628	-0.0133343	0.0133749	0.0961466	0.138977	0.133858	0.0563179	-0.00359937	-0.047557	-0.0501509	-0.0722837	-0.113967	-0.139365	-0.121825	-0.0784354	-0.0286932	0.0361361	0.089469	0.145305	0.157302	0.0863291	-0.0568824	-0.198378	-0.267102	-0.272336	-0.235171	-0.197177	-0.0805507	0.0702192	0.278185
-0.721747	-0.633321	-0.550805	-0.534547	-0.572294	-0.597893	-0.60054	-0.557711	-0.549718	-0.554629	-0.562104	-0.500926	-0.320823	-0.114077	0.0440132	0.0726208	-0.0662256	-0.301467	-0.574164	-0.779231	-0.910573	-0.970648	-0.960011	-0.889955	-0.770291	-0.638249	-0.515638	-0.495856	-0.518713	-0.507259	-0.428255	-0.288488	-0.152112	-0.0619879	-0.0392305	-0.0559495	-0.109385	-0.19141	-0.24898	-0.321928	-0.352611	-0.405838	-0.574838	-0.81702	-1.1686	-1.47607	-1.67476	-1.73662	-1.66652	-1.49503
-0.515601	-0.582919	-0.633091	-0.654847	-0.599833	-0.409833	-0.193984	-0.0289335	0.000933605	-0.144026	-0.389624	-0.674328	-0.888425	-1.02555	-1.08827	-1.07716	-1.00402	-0.879091	-0.741236	-0.613226	-0.592572	-0.616436	-0.604478	-0.521995	-0.376075	-0.233694	-0.139602	-0.115842	-0.133298	-0.189086	-0.274723	-0.334827	-0.410987	-0.443021	-0.498591	-0.675033	-0.927878	-1.29494	-1.61595	-1.82339	-1.88796	-1.81478	-1.63574	-1.46186	-1.38831	-1.43189	-1.58926	-1.7268	-1.79993	-1.7365
-0.391578	-0.179175	0.0323034	0.238764	0.394661	0.442652	0.481251	0.570047	0.740444	0.867785	0.821258	0.535745	0.132549	-0.232073	-0.375588	-0.239978	0.0624735	0.444586	0.758312	0.951218	1.06037	1.08009	1.02028	0.865183	0.656974	0.399728	0.159344	-0.102318	-0.283411	-0.385296	-0.341993	-0.0813337	0.301676	0.657471	0.850113	0.789003	0.612829	0.380932	0.202358	0.0909989	0.04801	0.0698121	0.14178	0.258107	0.357921	0.439024	0.384337	0.236996	-0.020306	-0.291409
-0.414019	-0.333419	-0.196911	-0.0126249	0.171381	0.260062	0.211566	0.0515062	-0.170147	-0.343265	-0.455411	-0.528882	-0.590683	-0.550804	-0.342406	-0.019326	0.324706	0.607688	0.712914	0.648667	0.454893	0.188671	-0.138268	-0.4613	-0.674524	-0.649871	-0.414378	-0.0177102	0.397371	0.70803	0.897531	0.960864	0.997282	1.08716	1.18065	1.30515	1.35909	1.37257	1.35933	1.31532	1.18404	0.987123	0.791271	0.611703	0.505572	0.557404	0.723729	0.956857	1.21073	1.44158
-1.18914	-1.2632	-1.32891	-1.38649	-1.36923	-1.32382	-1.25849	-1.21243	-1.18106	-1.10641	-0.95533	-0.785603	-0.598985	-0.417859	-0.275819	-0.179481	-0.0865666	-0.0124869	0.020056	0.0136505	-0.0281734	-0.0959896	-0.16897	-0.304841	-0.564557	-0.959991	-1.4195	-1.8757	-2.18651	-2.2448	-2.14493	-1.97839	-1.83753	-1.76054	-1.75236	-1.85218	-2.00021	-2.12204	-2.1817	-2.13015	-2.00565	-1.91389	-1.93091	-1.9988	-1.97753	-1.81688	-1.52187	-1.16314	-0.870704	-0.685265
1.26367	1.14439	1.03555	0.908972	0.800493	0.737545	0.687691	0.678662	0.560854	0.307581	-0.0031418	-0.271233	-0.385966	-0.328178	-0.204331	-0.145703	-0.274568	-0.558506	-0.79168	-0.811172	-0.626825	-0.330539	-0.0421929	0.142019	0.199538	0.0939651	-0.0221346	-0.0829304	0.0328028	0.299718	0.609594	0.844896	0.918636	0.845968	0.703201	0.500841	0.287173	0.023939	-0.260938	-0.481486	-0.577893	-0.619305	-0.597127	-0.558103	-0.510146	-0.506315	-0.516475	-0.513799	-0.5648	-0.585167
-0.52857	-0.303761	-0.0825711	0.138686	0.313063	0.356385	0.276081	0.0709048	-0.111679	-0.162699	-0.0398588	0.201201	0.436047	0.611471	0.689049	0.739337	0.768871	0.802052	0.794187	0.744884	0.657918	0.554732	0.457869	0.376729	0.396786	0.496828	0.668653	0.78793	0.835982	0.787235	0.69201	0.589347	0.554211	0.548078	0.593161	0.682172	0.772509	0.854532	0.901717	0.883123	0.782701	0.670269	0.587966	0.648828	0.793699	0.995016	1.13854	1.12864	0.981228	0.774417
0.0710102	-0.0742429	-0.118367	-0.0638432	0.0144879	0.120539	0.207583	0.308659	0.388302	0.358038	0.211124	0.0484307	-0.0517531	-0.0342957	0.0509109	0.13969	0.121629	-0.120858	-0.481768	-0.797421	-0.966081	-0.947841	-0.786929	-0.646711	-0.539541	-0.521084	-0.505434	-0.448939	-0.330065	-0.250571	-0.303355	-0.450307	-0.589641	-0.598295	-0.525459	-0.417259	-0.364014	-0.384715	-0.46992	-0.535054	-0.621604	-0.665916	-0.747254	-0.881024	-1.02797	-1.13604	-1.23615	-1.30587	-1.33289	-1.29719
0.281414	0.264638	0.286353	0.353956	0.416946	0.390557	0.248007	0.0901466	-0.00706092	0.00987783	0.0925532	0.178695	0.16117	-0.0741126	-0.424301	-0.730577	-0.894227	-0.876529	-0.720397	-0.584344	-0.480358	-0.46245	-0.447264	-0.392447	-0.277105	-0.199973	-0.251188	-0.393775	-0.52897	-0.537367	-0.466695	-0.361708	-0.310046	-0.330132	-0.412805	-0.476004	-0.559984	-0.602979	-0.6819	-0.811696	-0.954275	-1.05914	-1.15627	-1.22392	-1.25014	-1.2155	-1.14294	-1.04782	-0.932969	-0.856804
-0.488572	-0.676347	-0.873351	-1.0373	-1.11468	-1.09324	-0.989863	-0.863605	-0.778879	-0.78261	-0.881884	-0.970694	-1.00732	-0.971447	-0.898602	-0.807338	-0.713038	-0.566542	-0.342627	-0.17465	-0.122844	-0.290431	-0.542167	-0.847444	-1.02274	-0.953372	-0.684508	-0.287117	0.0410056	0.194307	0.143158	-0.00833342	-0.106091	-0.0136711	0.19092	0.287437	0.182697	-0.121909	-0.489476	-0.836572	-1.10536	-1.27381	-1.39115	-1.48896	-1.57347	-1.62417	-1.65691	-1.62575	-1.55053	-1.51066
-0.846402	-1.00294	-1.02851	-0.926262	-0.719196	-0.489974	-0.362158	-0.293841	-0.255796	-0.247252	-0.248816	-0.277479	-0.260585	-0.185169	-0.0487219	0.0296038	-0.0115452	-0.202747	-0.496155	-0.734289	-0.859647	-0.808562	-0.640562	-0.416128	-0.242191	-0.154132	-0.102666	-0.0380589	0.00922805	0.0167797	-0.0360136	-0.17908	-0.361959	-0.510583	-0.669234	-0.767952	-0.833963	-0.818519	-0.745422	-0.597317	-0.437524	-0.310803	-0.240241	-0.193188	-0.132042	-0.0409716	0.0696495	0.163472	0.218898	0.192507
-0.534097	-0.586699	-0.620742	-0.588796	-0.516841	-0.37372	-0.221858	-0.101426	-0.0343661	0.0103524	0.0684634	0.155014	0.260146	0.349312	0.401987	0.376906	0.293513	0.132073	-0.103406	-0.332719	-0.542677	-0.72023	-0.803042	-0.73993	-0.570946	-0.35172	-0.148091	-0.0390803	-0.0258717	-0.112748	-0.176351	-0.162515	-0.0211619	0.202802	0.384094	0.434602	0.354421	0.276512	0.271322	0.351107	0.475226	0.577091	0.619506	0.581365	0.545096	0.461217	0.457054	0.515295	0.592083	0.681725
-0.562842	-0.415953	-0.264332	-0.140044	-0.116133	-0.221566	-0.409079	-0.62175	-0.811474	-0.940488	-1.04122	-1.06913	-1.04141	-0.917971	-0.772818	-0.751293	-0.861413	-1.02572	-1.10685	-1.05478	-0.935403	-0.803001	-0.722431	-0.68755	-0.680898	-0.685357	-0.673097	-0.649626	-0.590664	-0.491278	-0.350699	-0.175192	-0.0100489	0.123343	0.188864	0.197801	0.178064	0.0473516	-0.174683	-0.438376	-0.679345	-0.86603	-0.916123	-0.804515	-0.563437	-0.328975	-0.262163	-0.344012	-0.54314	-0.741247
0.477177	0.4008	0.274344	0.0456809	-0.243039	-0.561292	-0.857715	-1.09811	-1.24825	-1.26449	-1.18258	-1.08201	-0.948257	-0.781928	-0.636128	-0.46255	-0.384372	-0.400831	-0.47153	-0.550098	-0.572028	-0.528014	-0.475836	-0.47722	-0.538867	-0.62459	-0.647457	-0.576013	-0.460908	-0.342511	-0.26819	-0.232292	-0.238851	-0.298503	-0.360797	-0.481414	-0.632455	-0.814573	-0.908088	-0.912137	-0.903135	-0.849671	-0.693306	-0.500564	-0.302861	-0.164775	-0.184442	-0.393035	-0.664963	-0.894319
0.100129	0.448294	0.756296	0.98021	1.12318	1.20061	1.23198	1.31479	1.44435	1.62971	1.75665	1.78777	1.74376	1.61546	1.41973	1.19851	1.07347	1.1108	1.26513	1.44698	1.62577	1.86457	2.04981	2.13047	2.00748	1.773	1.50758	1.39551	1.49765	1.69611	1.8106	1.76765	1.67111	1.61898	1.66318	1.81638	1.97357	1.97341	1.74751	1.44123	1.10237	0.809265	0.611575	0.519584	0.516784	0.630934	0.831827	1.08303	1.24452	1.30821
-0.745949	-0.646129	-0.530334	-0.438854	-0.443481	-0.449262	-0.4667	-0.420233	-0.312916	-0.181206	-0.0585179	0.0209183	0.0292635	-0.000117481	-0.0543446	-0.0915515	-0.132499	-0.205569	-0.318061	-0.461027	-0.576801	-0.634194	-0.62762	-0.532226	-0.43118	-0.423073	-0.57502	-0.81472	-1.03974	-1.20881	-1.30292	-1.37927	-1.44184	-1.47198	-1.45578	-1.35485	-1.20663	-1.02382	-0.829168	-0.645577	-0.506445	-0.44312	-0.493719	-0.644654	-0.840198	-1.00637	-0.941771	-0.748522	-0.5012	-0.352392
0.691182	0.579306	0.488333	0.438137	0.474503	0.580971	0.678309	0.731162	0.708759	0.651885	0.549752	0.42661	0.288088	0.105551	-0.102955	-0.321583	-0.477596	-0.491917	-0.413743	-0.316711	-0.275516	-0.230052	-0.202503	-0.0669599	0.0589982	0.101984	0.0215835	-0.110352	-0.257405	-0.363218	-0.427897	-0.500672	-0.504263	-0.471333	-0.361428	-0.25582	-0.188644	-0.163847	-0.191352	-0.243299	-0.336805	-0.384972	-0.457754	-0.515541	-0.620795	-0.769224	-0.946158	-1.07644	-1.13378	-1.11095
0.591958	0.355387	0.162047	0.0725122	0.0973184	0.224211	0.397322	0.537309	0.62195	0.686356	0.732777	0.792032	0.871257	0.948775	1.05967	1.14989	1.15337	1.05829	0.860755	0.695954	0.623025	0.632428	0.7349	0.835095	0.824885	0.746379	0.582618	0.403293	0.285329	0.282937	0.42014	0.590352	0.634473	0.547257	0.416564	0.379606	0.446613	0.563587	0.655612	0.693293	0.739269	0.798885	0.864455	0.834659	0.733122	0.612493	0.466321	0.277395	0.129561	-0.0261655
0.512918	0.617815	0.754741	0.891447	0.988893	1.02183	0.911725	0.639861	0.307531	0.0147146	-0.0794463	0.0510917	0.328384	0.627197	0.824723	0.927463	0.931499	0.861101	0.7159	0.468283	0.1803	-0.055142	-0.132796	0.0146806	0.332614	0.685668	0.910724	0.93651	0.862854	0.832615	0.876781	0.945005	0.99099	0.955198	0.844142	0.678511	0.578624	0.551038	0.664797	0.886261	1.11207	1.32043	1.43673	1.53993	1.58659	1.6278	1.60228	1.55497	1.41717	1.2356
0.416439	0.397425	0.400794	0.416289	0.407489	0.300543	0.0922307	-0.174264	-0.396703	-0.545946	-0.556845	-0.479407	-0.384735	-0.327009	-0.34884	-0.442483	-0.557517	-0.659381	-0.692929	-0.604564	-0.389037	-0.179281	-0.0373709	-0.0116608	-0.100979	-0.188605	-0.167768	-0.0458636	0.158148	0.324222	0.437711	0.423978	0.285195	0.171789	0.144071	0.182885	0.238211	0.251009	0.164002	0.0911137	0.0597665	0.164871	0.342146	0.48348	0.553838	0.561678	0.476381	0.3807	0.305525	0.292907
-0.158216	-0.110955	-0.0166855	0.048688	0.133404	0.233698	0.3469	0.466576	0.586541	0.675873	0.648675	0.54672	0.408028	0.324189	0.232944	0.188989	0.144022	0.108034	0.106194	0.167088	0.310838	0.408534	0.462891	0.491382	0.552055	0.663184	0.703788	0.731085	0.658162	0.559112	0.504821	0.49402	0.423289	0.307206	0.11488	-0.083323	-0.150014	-0.125595	-0.0349752	0.0306446	0.107903	0.175127	0.235343	0.270664	0.276744	0.266719	0.266947	0.232088	0.183596	0.118415
-0.552578	-0.44771	-0.255952	0.00516874	0.238069	0.323661	0.218476	-0.0346151	-0.355692	-0.663681	-0.815313	-0.775241	-0.634312	-0.543965	-0.577135	-0.694668	-0.85572	-1.0326	-1.20345	-1.3061	-1.35488	-1.27497	-1.05452	-0.744959	-0.459998	-0.31944	-0.334742	-0.427581	-0.467036	-0.454176	-0.400345	-0.424621	-0.562733	-0.813779	-1.07854	-1.31529	-1.47669	-1.5908	-1.62782	-1.63934	-1.67071	-1.72387	-1.7597	-1.70261	-1.60442	-1.49019	-1.49224	-1.57973	-1.67215	-1.73362
-0.948201	-0.854555	-0.766962	-0.652643	-0.585775	-0.588826	-0.692431	-0.85158	-0.933429	-0.848818	-0.596136	-0.265673	-0.00162322	0.126071	0.124513	0.0885031	0.0696543	0.048947	0.051228	0.0542923	0.0570836	0.058477	0.0817564	0.0567368	-0.0319218	-0.180151	-0.318253	-0.46536	-0.624102	-0.80722	-0.94652	-1.04553	-1.11475	-1.16323	-1.22819	-1.31384	-1.39938	-1.4485	-1.49247	-1.48471	-1.47435	-1.43705	-1.42187	-1.39237	-1.33166	-1.23867	-1.12394	-1.00108	-0.88498	-0.756542
0.276952	0.311934	0.401459	0.489441	0.517125	0.486482	0.374791	0.213762	0.133476	0.123169	0.106372	0.0354473	-0.0740705	-0.15603	-0.239159	-0.308845	-0.33125	-0.283596	-0.183473	-0.0452311	0.0870776	0.112013	0.0311875	-0.0844845	-0.193536	-0.33603	-0.483548	-0.642829	-0.748131	-0.820866	-0.860763	-0.912366	-0.997142	-1.10907	-1.29048	-1.4893	-1.64694	-1.70616	-1.71246	-1.70545	-1.73117	-1.84514	-1.99086	-2.10629	-2.11819	-1.94276	-1.63223	-1.29807	-1.03901	-0.919668
0.222672	0.383272	0.443886	0.430629	0.325511	0.170552	0.0891388	0.0786863	0.0616535	-0.0102669	-0.121323	-0.204433	-0.28873	-0.359394	-0.382114	-0.333791	-0.232261	-0.0920782	0.0420885	0.0673739	-0.0145865	-0.131883	-0.242466	-0.38696	-0.536551	-0.698068	-0.804848	-0.878605	-0.919062	-0.97139	-1.05736	-1.17086	-1.35481	-1.55643	-1.71628	-1.77633	-1.78272	-1.77562	-1.80169	-1.91726	-2.06503	-2.18208	-2.19414	-2.01625	-1.70136	-1.36251	-1.09981	-0.978794	-0.990676	-1.08407
-0.366607	-0.320306	-0.266523	-0.318969	-0.509023	-0.893563	-1.35512	-1.71941	-1.83192	-1.65621	-1.29274	-0.955432	-0.796346	-0.839161	-1.01294	-1.24479	-1.39367	-1.45941	-1.484	-1.5209	-1.64916	-1.83075	-1.97961	-2.00439	-1.92514	-1.86505	-1.86132	-1.91628	-1.97644	-2.00596	-1.98746	-1.88978	-1.76245	-1.6103	-1.528	-1.49799	-1.56031	-1.67472	-1.79393	-1.86898	-1.88891	-1.88835	-1.88364	-1.88751	-1.86442	-1.83876	-1.77489	-1.80455	-1.90438	-2.09009
0.608892	0.404705	0.222161	0.0760033	0.0239267	0.024427	0.0959031	0.205726	0.324234	0.457737	0.641253	0.867618	1.09129	1.19372	1.14296	0.940679	0.660535	0.415974	0.300258	0.330871	0.458795	0.591805	0.643367	0.654062	0.62787	0.651635	0.71508	0.735883	0.68299	0.502302	0.239842	-0.00227307	-0.156783	-0.180807	-0.118357	-0.0478485	-0.00308677	0.00447292	-0.0111699	-0.0401205	-0.0236794	0.0325132	0.123071	0.178621	0.143575	0.0082119	-0.165072	-0.302023	-0.359161	-0.324212
-0.18943	-0.202071	-0.253842	-0.336758	-0.35947	-0.35237	-0.291315	-0.277872	-0.297459	-0.303676	-0.3147	-0.358235	-0.380608	-0.428837	-0.495895	-0.61456	-0.736228	-0.746701	-0.633328	-0.488827	-0.402674	-0.487513	-0.608601	-0.678813	-0.715656	-0.69934	-0.651152	-0.611322	-0.512854	-0.38857	-0.337095	-0.365758	-0.519125	-0.622097	-0.683113	-0.659736	-0.552544	-0.458734	-0.452836	-0.569686	-0.765915	-1.02213	-1.29231	-1.52958	-1.6619	-1.70786	-1.75467	-1.83103	-1.98354	-2.13659
0.493915	0.49644	0.558799	0.695629	0.809545	0.866018	0.859667	0.824679	0.823539	0.835544	0.866571	0.934602	0.944072	0.89947	0.774243	0.635406	0.456206	0.330756	0.228517	0.108567	-0.0396885	-0.207249	-0.337236	-0.334497	-0.134526	0.176398	0.508836	0.746571	0.835925	0.830491	0.750491	0.674321	0.627872	0.592256	0.555117	0.585292	0.686296	0.820507	0.939198	1.00945	0.988838	0.933307	0.841289	0.811984	0.816123	0.792507	0.681615	0.520312	0.362588	0.258863
0.640135	0.710581	0.773561	0.857327	0.869633	0.829337	0.703243	0.563445	0.383005	0.256686	0.15374	0.0329604	-0.116321	-0.285042	-0.415928	-0.41317	-0.211815	0.10126	0.435999	0.67538	0.765352	0.75988	0.679327	0.60263	0.555859	0.519996	0.482601	0.512985	0.614687	0.749827	0.869339	0.940078	0.919323	0.863408	0.770753	0.741245	0.745412	0.721633	0.609974	0.447555	0.288739	0.184296	0.122403	0.0910749	0.136946	0.209996	0.324682	0.447086	0.439592	0.376448
0.1158	0.32559	0.628385	0.936453	1.15961	1.27579	1.27394	1.2764	1.23707	1.15728	1.01881	0.935977	0.945729	1.03278	1.15185	1.2375	1.26665	1.17712	1.03655	0.896541	0.829334	0.834381	0.869272	0.925166	0.946364	0.898964	0.814186	0.713388	0.622543	0.621443	0.73636	0.932663	1.13542	1.26615	1.25972	1.13165	0.978157	0.848218	0.780472	0.760319	0.728179	0.697221	0.736909	0.847755	1.08988	1.33089	1.45962	1.47206	1.3816	1.27465
0.798336	0.882362	0.98056	1.00317	0.964871	0.850135	0.774114	0.783064	0.862953	0.972232	1.05084	1.0776	0.995423	0.866413	0.737921	0.67624	0.680873	0.712895	0.764192	0.783647	0.740145	0.662338	0.569829	0.486455	0.485445	0.590912	0.771072	0.957156	1.07714	1.07123	0.9537	0.812825	0.693572	0.631397	0.612901	0.583404	0.554992	0.591416	0.693147	0.915359	1.13656	1.25469	1.26611	1.18309	1.08494	1.01853	0.943054	0.77163	0.595525	0.462345
0.285637	0.466872	0.614135	0.720732	0.750646	0.724142	0.647869	0.588422	0.526392	0.402473	0.302432	0.275578	0.341022	0.481908	0.777696	1.05454	1.24752	1.30152	1.26486	1.20971	1.19071	1.27105	1.37873	1.44731	1.36086	1.22211	1.03691	0.845431	0.703031	0.618211	0.59981	0.624553	0.667168	0.688983	0.717241	0.760833	0.744235	0.642381	0.47136	0.294125	0.163307	0.160256	0.306302	0.58014	0.857654	1.07307	1.21379	1.27146	1.29189	1.24333
1.33857	1.26573	1.14753	1.05174	0.852524	0.569173	0.157986	-0.33454	-0.703797	-0.82102	-0.637481	-0.249238	0.214672	0.639092	0.911233	1.01802	0.992196	0.871415	0.679812	0.492584	0.371846	0.331128	0.41011	0.581965	0.772751	0.934972	1.11721	1.35503	1.65508	1.84876	1.86388	1.63285	1.26312	0.844141	0.627059	0.637049	0.730192	0.815355	0.750923	0.569966	0.378079	0.337711	0.422892	0.542513	0.5365	0.51091	0.55723	0.725104	1.04104	1.41631
1.17676	1.05061	0.964586	0.776005	0.505271	0.109645	-0.372155	-0.733371	-0.848041	-0.668499	-0.288711	0.165097	0.580273	0.846488	0.950949	0.925689	0.807538	0.620107	0.436956	0.318847	0.279016	0.356278	0.524391	0.711022	0.869711	1.04798	1.28062	1.57414	1.7636	1.77839	1.55239	1.19071	0.780858	0.568503	0.578275	0.66939	0.752698	0.689669	0.512653	0.324945	0.285456	0.368782	0.485798	0.479916	0.454883	0.500195	0.664412	0.973471	1.34057	1.69196
-1.02969	-0.934847	-0.826992	-0.74102	-0.618804	-0.490859	-0.341641	-0.223368	-0.107319	0.0790171	0.233478	0.37289	0.39785	0.317398	0.126663	-0.103659	-0.32937	-0.529374	-0.672474	-0.782579	-0.817706	-0.807207	-0.758897	-0.692516	-0.622316	-0.556354	-0.417481	-0.165609	0.138495	0.47855	0.759321	0.947902	0.980032	0.89206	0.743709	0.565447	0.357703	0.0901277	-0.207849	-0.484398	-0.6548	-0.6736	-0.572583	-0.450793	-0.331409	-0.293154	-0.378665	-0.499628	-0.625593	-0.716289
0.372522	0.133077	-0.0864023	-0.281061	-0.462825	-0.595895	-0.70388	-0.738331	-0.728034	-0.680654	-0.615551	-0.546702	-0.482011	-0.345811	-0.0987873	0.199462	0.532971	0.808337	0.993287	1.0248	0.93852	0.793025	0.618195	0.41445	0.152026	-0.140215	-0.411439	-0.578561	-0.596999	-0.497926	-0.378482	-0.261395	-0.223877	-0.307742	-0.426377	-0.549916	-0.638867	-0.730274	-0.89234	-1.05349	-1.17953	-1.21297	-1.14208	-1.04055	-0.89344	-0.716303	-0.524922	-0.368951	-0.270654	-0.274004
-0.717039	-0.696151	-0.649674	-0.592918	-0.521814	-0.450398	-0.381702	-0.237071	0.0252452	0.341958	0.696113	0.988526	1.18493	1.21839	1.12677	0.972266	0.786613	0.570255	0.291585	-0.0187468	-0.306762	-0.484229	-0.503809	-0.398603	-0.271764	-0.147429	-0.107589	-0.196646	-0.322624	-0.453811	-0.548268	-0.645334	-0.817433	-0.988561	-1.1224	-1.15791	-1.08264	-0.97482	-0.818601	-0.630498	-0.42727	-0.261643	-0.157261	-0.160818	-0.260055	-0.424055	-0.555566	-0.543335	-0.36415	-0.114632
-0.319897	-0.518544	-0.597112	-0.578146	-0.492124	-0.403582	-0.365244	-0.430285	-0.486501	-0.520391	-0.541351	-0.486668	-0.398202	-0.297443	-0.193328	-0.108653	0.0357665	0.269567	0.52799	0.748827	0.842844	0.785277	0.634191	0.469042	0.353513	0.337418	0.440948	0.593225	0.6567	0.691792	0.671117	0.655637	0.694033	0.730008	0.74895	0.715988	0.632716	0.528339	0.448687	0.369274	0.389219	0.398258	0.369362	0.208632	-0.0329472	-0.266462	-0.370056	-0.238088	0.139039	0.651447
-0.338476	-0.214225	-0.0309535	0.211264	0.513504	0.783498	0.926142	0.891543	0.719235	0.529293	0.356909	0.339071	0.40385	0.512375	0.599327	0.568556	0.483946	0.416414	0.382244	0.372911	0.383547	0.395179	0.38135	0.306201	0.283469	0.302179	0.275779	0.23067	0.177391	0.174304	0.174211	0.174788	0.202717	0.307238	0.43647	0.538931	0.634637	0.660892	0.711951	0.818878	0.904385	0.919237	0.798613	0.617363	0.424708	0.367992	0.467855	0.771579	1.09448	1.40392
0.827639	0.77264	0.716775	0.730533	0.832142	1.0012	1.1643	1.20623	1.13306	0.941722	0.699354	0.387363	0.0863596	-0.137635	-0.23829	-0.20685	-0.175442	-0.201408	-0.285769	-0.403966	-0.507617	-0.589979	-0.577109	-0.457914	-0.274636	-0.0241928	0.187677	0.266113	0.202289	0.111394	0.0352242	0.00466529	-0.0441912	-0.106146	-0.193394	-0.246909	-0.261169	-0.266322	-0.320147	-0.348628	-0.323428	-0.269304	-0.178443	-0.0755992	0.00754812	0.0498254	0.199619	0.357831	0.521335	0.542789
0.356056	0.44534	0.512611	0.471183	0.357776	0.199792	0.0376007	-0.0864959	-0.181805	-0.255602	-0.342417	-0.379192	-0.353449	-0.266539	-0.194792	-0.171742	-0.172035	-0.221363	-0.182133	-0.119341	-0.0437199	0.0695563	0.167723	0.233568	0.279471	0.34854	0.445554	0.563338	0.578406	0.486891	0.329605	0.157699	-0.0330248	-0.140346	-0.176997	-0.142662	-0.0545161	0.0192401	0.0669339	0.0829254	0.0608043	0.0624438	0.0927091	0.0999909	0.165235	0.276512	0.398618	0.500656	0.597327	0.61578
0.0460662	0.0981206	0.0588891	-0.0643287	-0.198422	-0.238179	-0.197524	-0.103795	-0.0393686	-0.102151	-0.242836	-0.492519	-0.695849	-0.837519	-0.899931	-0.879485	-0.805295	-0.736337	-0.633061	-0.505751	-0.425271	-0.391693	-0.436598	-0.481918	-0.57434	-0.681466	-0.79025	-0.861657	-0.873661	-0.80409	-0.630652	-0.414663	-0.22942	-0.16848	-0.244154	-0.411161	-0.573252	-0.749908	-0.872844	-0.998069	-1.10698	-1.1137	-1.02971	-0.939194	-0.898604	-0.878194	-0.8442	-0.730255	-0.512296	-0.22696
-0.77016	-0.827247	-0.871367	-0.884228	-0.844452	-0.771767	-0.704751	-0.604383	-0.480658	-0.402444	-0.369812	-0.413452	-0.457496	-0.547315	-0.651425	-0.757146	-0.826542	-0.838208	-0.770596	-0.602042	-0.392135	-0.212107	-0.152883	-0.226427	-0.388731	-0.546258	-0.71794	-0.837414	-0.959113	-1.06496	-1.07148	-0.989862	-0.901896	-0.862449	-0.842614	-0.809577	-0.69884	-0.487019	-0.209716	0.0282893	0.118027	0.114723	-0.0121974	-0.134017	-0.281899	-0.330461	-0.30699	-0.273291	-0.269489	-0.320944
0.496808	0.651456	0.753747	0.746697	0.692932	0.529648	0.391636	0.224096	0.169079	0.19567	0.233849	0.238156	0.179862	0.131252	0.077716	0.0483635	0.0822581	0.149921	0.274665	0.441513	0.624589	0.861641	1.12972	1.32448	1.46717	1.53733	1.57426	1.51814	1.30117	1.03875	0.844596	0.722113	0.641318	0.617014	0.600054	0.58669	0.554326	0.513396	0.421455	0.213723	-0.0446258	-0.148744	-0.0835202	0.145501	0.400028	0.624555	0.801034	1.01521	1.29038	1.56597
-0.27454	-0.081072	0.0783942	0.174251	0.199788	0.149042	0.101754	0.0496729	0.0211182	0.0540915	0.119915	0.241269	0.40358	0.581681	0.812289	1.07308	1.26255	1.40136	1.46961	1.50554	1.45094	1.23987	0.984586	0.795707	0.676553	0.597954	0.574312	0.557813	0.544811	0.513327	0.47351	0.384068	0.181983	-0.0693434	-0.170632	-0.107181	0.115615	0.363223	0.581647	0.753329	0.961686	1.22937	1.49747	1.66564	1.55005	1.232	0.738916	0.295104	0.0547746	0.047175
-0.0452691	-0.0557629	-0.000692805	0.046285	0.200632	0.356697	0.477677	0.413844	0.229798	-0.035757	-0.281484	-0.459586	-0.529714	-0.554101	-0.615665	-0.719849	-0.765268	-0.748342	-0.678668	-0.577694	-0.514456	-0.497545	-0.589513	-0.783989	-1.00325	-1.19183	-1.29204	-1.23843	-0.980033	-0.595097	-0.213974	0.0112959	-0.0277324	-0.254573	-0.565071	-0.84896	-0.988717	-0.967081	-0.843934	-0.745668	-0.68147	-0.719843	-0.796815	-0.860736	-0.85343	-0.779613	-0.599405	-0.355294	-0.163112	-0.058493
-0.63325	-0.619566	-0.577062	-0.513973	-0.474853	-0.472219	-0.558879	-0.742129	-0.948729	-1.12643	-1.22085	-1.17033	-0.926857	-0.56414	-0.205017	0.00724959	-0.0295259	-0.243273	-0.535848	-0.80335	-0.93504	-0.914653	-0.798614	-0.70602	-0.645528	-0.681686	-0.754215	-0.814446	-0.807562	-0.738006	-0.5682	-0.33818	-0.157091	-0.058511	-0.0709582	-0.15144	-0.288629	-0.417806	-0.472823	-0.451706	-0.375804	-0.271078	-0.204287	-0.192788	-0.18306	-0.113214	-0.0236611	0.0778171	0.180078	0.240415
-0.515381	-0.622148	-0.784826	-0.95662	-1.11435	-1.19371	-1.1426	-0.896277	-0.529316	-0.165991	0.0487603	0.0115545	-0.204694	-0.500693	-0.771325	-0.904556	-0.88393	-0.766533	-0.672856	-0.611656	-0.648237	-0.721615	-0.782551	-0.775587	-0.705217	-0.533423	-0.300711	-0.117503	-0.0177698	-0.0303627	-0.111786	-0.250581	-0.381269	-0.436931	-0.415566	-0.338776	-0.232824	-0.165251	-0.153618	-0.143776	-0.0731132	0.0174879	0.120154	0.223612	0.284654	0.307306	0.323023	0.397714	0.529341	0.679451
-0.515028	-0.330548	-0.199413	-0.131824	-0.136067	-0.0974661	0.027013	0.217133	0.408418	0.527977	0.545941	0.452409	0.215504	-0.144785	-0.594169	-1.03847	-1.33612	-1.37373	-1.2187	-0.945307	-0.676103	-0.487337	-0.382266	-0.342351	-0.370313	-0.439673	-0.510284	-0.543172	-0.547657	-0.578801	-0.698378	-0.827996	-0.941854	-0.998346	-1.03499	-1.09083	-1.1561	-1.23325	-1.32493	-1.33862	-1.2397	-1.03061	-0.724698	-0.451276	-0.28784	-0.242251	-0.301064	-0.373139	-0.413826	-0.411794
-0.756306	-0.543578	-0.286241	-0.0639653	0.0667415	0.097356	0.0374523	-0.0359601	-0.0774019	-0.0753327	0.0317846	0.228031	0.455002	0.617421	0.68868	0.628609	0.387892	0.0582226	-0.258395	-0.383717	-0.315899	-0.148498	-0.0245115	0.0310959	0.00882654	-0.0115783	0.0231828	0.142051	0.280976	0.381061	0.430639	0.40999	0.332561	0.291025	0.294132	0.317838	0.326419	0.314317	0.241066	0.12627	-0.0624938	-0.285298	-0.495078	-0.643482	-0.710698	-0.74408	-0.75512	-0.829285	-0.890249	-0.83354
-0.229514	-0.0414262	0.131781	0.267738	0.250318	0.123936	-0.0211698	-0.102635	-0.137815	-0.199397	-0.365324	-0.669312	-1.02943	-1.27688	-1.31949	-1.16235	-0.891025	-0.577687	-0.32724	-0.232053	-0.196686	-0.177212	-0.0649683	0.0521386	0.0889044	0.0506226	-0.0415804	-0.097884	-0.176891	-0.278325	-0.37405	-0.451474	-0.477691	-0.389004	-0.133557	0.192039	0.510488	0.76865	0.897532	0.962291	0.954883	0.940513	0.877756	0.802692	0.697387	0.607732	0.525934	0.451285	0.44432	0.547222
-0.741476	-0.67621	-0.54067	-0.357773	-0.201989	-0.0696508	0.0351828	0.112627	0.174433	0.198989	0.163252	0.0702259	-0.0468283	-0.175344	-0.233413	-0.196622	-0.108458	0.0699599	0.221384	0.275554	0.193235	0.0188267	-0.190091	-0.24888	-0.137928	0.0899215	0.277636	0.390374	0.450919	0.545526	0.680452	0.845061	1.01769	1.11247	1.16605	1.19898	1.21899	1.15354	1.07591	0.979181	0.886445	0.796749	0.713695	0.590146	0.49497	0.487789	0.490923	0.535841	0.543892	0.596741
0.083777	0.129606	0.155397	0.194027	0.352938	0.644971	1.00388	1.17757	1.08528	0.712071	0.276211	-0.0830728	-0.258311	-0.270121	-0.224736	-0.130326	-0.0852263	-0.141165	-0.279245	-0.402096	-0.440628	-0.423009	-0.350427	-0.266176	-0.138124	-0.0569559	-0.00639605	-0.0548453	-0.168204	-0.311916	-0.433686	-0.534757	-0.593332	-0.62849	-0.635231	-0.620526	-0.507867	-0.275537	-0.0122198	0.247007	0.453375	0.568382	0.597694	0.540077	0.47093	0.436871	0.477161	0.531845	0.558571	0.505303
-0.705557	-0.679991	-0.551759	-0.33473	-0.0959537	0.13836	0.326797	0.43181	0.458575	0.405965	0.342827	0.311727	0.348516	0.398448	0.422852	0.374212	0.28705	0.173972	0.103252	0.101115	0.126831	0.142704	0.0994348	0.0460951	-0.0505296	-0.143576	-0.16298	-0.0506953	0.13871	0.322368	0.397076	0.335048	0.17795	-0.0732073	-0.299687	-0.50858	-0.589324	-0.540081	-0.4354	-0.363439	-0.416179	-0.63627	-0.890713	-1.05131	-1.12925	-1.15273	-1.15006	-1.12631	-1.08767	-1.08498
-0.385548	-0.761977	-1.0517	-1.20641	-1.26825	-1.28929	-1.28607	-1.25751	-1.21101	-1.20778	-1.26753	-1.40343	-1.57992	-1.72462	-1.6571	-1.32697	-0.848142	-0.406055	-0.144367	-0.147152	-0.320742	-0.600915	-0.79333	-0.812736	-0.679432	-0.387587	-0.0922428	0.10618	0.133595	0.0840469	-0.036609	-0.0912288	-0.182119	-0.312948	-0.429388	-0.586475	-0.69702	-0.739422	-0.719737	-0.724953	-0.795207	-0.922267	-0.933878	-0.84763	-0.687502	-0.595697	-0.621941	-0.774044	-1.04699	-1.32808
0.535253	0.470713	0.356476	0.267433	0.225987	0.205243	0.193397	0.125403	0.0892442	0.108351	0.193752	0.359721	0.508734	0.521064	0.39294	0.207854	0.019406	-0.104234	-0.183914	-0.256402	-0.31715	-0.324336	-0.301388	-0.28214	-0.248295	-0.225044	-0.157857	0.0552654	0.349465	0.635463	0.83621	0.850876	0.701362	0.379934	0.0828019	-0.123502	-0.152692	-0.078428	0.0396509	0.160589	0.219002	0.240401	0.206232	0.189305	0.184135	0.262359	0.438094	0.670712	0.850526	0.942264
-0.455539	-0.352074	-0.250352	-0.170984	-0.158972	-0.276786	-0.432521	-0.555896	-0.608024	-0.606111	-0.601658	-0.588427	-0.553595	-0.512111	-0.451696	-0.377135	-0.312248	-0.259948	-0.182281	-0.111214	-0.0850375	-0.142524	-0.269155	-0.417539	-0.539862	-0.62426	-0.645505	-0.635853	-0.621479	-0.596701	-0.560521	-0.565786	-0.598574	-0.668393	-0.758276	-0.845703	-0.895522	-0.829393	-0.664127	-0.49377	-0.365358	-0.334159	-0.350787	-0.310475	-0.191351	-0.00331605	0.185317	0.316095	0.326496	0.209585
-0.317546	-0.306574	-0.295032	-0.283016	-0.260065	-0.218867	-0.225322	-0.265517	-0.351107	-0.461294	-0.56847	-0.629544	-0.548476	-0.345878	-0.137038	0.020383	0.0586289	0.0382446	0.0876634	0.233697	0.464209	0.695453	0.855773	0.868524	0.725203	0.53227	0.355609	0.206837	0.099437	0.0429324	0.00141296	-0.0626666	-0.151038	-0.206769	-0.182012	-0.135826	-0.0349129	0.0501455	0.152103	0.325938	0.511409	0.723404	0.818238	0.7748	0.564313	0.272378	-0.0354688	-0.228731	-0.277782	-0.200342
0.420587	0.422593	0.370532	0.334068	0.246417	0.195508	0.218329	0.266951	0.350188	0.435523	0.542354	0.682931	0.874968	1.04715	1.16173	1.1378	0.938411	0.651913	0.353848	0.146761	0.1239	0.265109	0.433021	0.547766	0.630105	0.716155	0.797779	0.889111	1.00067	1.11969	1.27514	1.39976	1.54463	1.62196	1.61365	1.57182	1.46772	1.35228	1.30391	1.28298	1.30186	1.36068	1.40455	1.42187	1.34108	1.16543	0.948889	0.651937	0.449368	0.379527
0.31914	0.343111	0.331543	0.285361	0.220723	0.186862	0.270588	0.442904	0.587152	0.63472	0.592102	0.473498	0.308645	0.124906	-0.0603415	-0.278363	-0.559693	-0.838866	-0.991746	-1.07552	-1.12196	-1.17092	-1.24672	-1.33203	-1.39357	-1.38535	-1.40165	-1.47279	-1.53658	-1.51261	-1.46045	-1.42178	-1.41415	-1.4018	-1.43866	-1.47593	-1.48833	-1.46271	-1.41572	-1.376	-1.3608	-1.36106	-1.37622	-1.33667	-1.15799	-0.905505	-0.642768	-0.471057	-0.400828	-0.410022
-0.484021	-0.459017	-0.490426	-0.535709	-0.560275	-0.519006	-0.465689	-0.360756	-0.318772	-0.300777	-0.253308	-0.164516	0.035184	0.343335	0.717088	1.05221	1.30992	1.38516	1.28787	1.09387	0.899568	0.771536	0.745255	0.825699	0.989843	1.1687	1.23326	1.1244	0.905491	0.649977	0.526918	0.513503	0.553969	0.60516	0.566731	0.45672	0.342353	0.329591	0.462507	0.729706	0.988096	1.08353	0.955541	0.63241	0.25599	-0.0517879	-0.250499	-0.295766	-0.188485	-0.0354126
0.636866	0.829092	1.03696	1.21833	1.28254	1.17246	0.953967	0.698939	0.576114	0.562725	0.603114	0.654207	0.615852	0.50605	0.3919	0.379162	0.511825	0.778517	1.03641	1.13167	1.00392	0.681405	0.305701	-0.00149133	-0.199825	-0.245006	-0.137928	0.0148528	0.134925	0.175513	0.0867848	-0.0094191	-0.0689668	-0.0366883	0.0659168	0.248133	0.375471	0.477856	0.543493	0.634157	0.821919	1.0299	1.20234	1.27925	1.25931	1.20394	1.16201	1.09058	1.09933	1.12765
0.888534	0.868071	0.907865	1.00876	1.08515	1.11212	1.07103	0.938493	0.774664	0.635609	0.563936	0.589082	0.648093	0.688161	0.703656	0.691545	0.655983	0.556721	0.391534	0.174436	-0.0157229	-0.140929	-0.182299	-0.184376	-0.167439	-0.12594	-0.047096	0.0618075	0.216869	0.374671	0.481325	0.501183	0.409763	0.172025	-0.101062	-0.277148	-0.364974	-0.366253	-0.353993	-0.390056	-0.439733	-0.470849	-0.506392	-0.49357	-0.491993	-0.505439	-0.492481	-0.462365	-0.458798	-0.4509
-1.1077	-1.05982	-1.03862	-1.00532	-0.956513	-0.946144	-0.936912	-0.945048	-0.99025	-0.988664	-0.996965	-1.00694	-1.02538	-1.09295	-1.13172	-1.14341	-1.0832	-0.990012	-0.873984	-0.812229	-0.802026	-0.828499	-0.827022	-0.772561	-0.752451	-0.757202	-0.793575	-0.854061	-0.886378	-0.923164	-1.01443	-1.16115	-1.3845	-1.63252	-1.8182	-1.89358	-1.90852	-1.90103	-1.81391	-1.69771	-1.58092	-1.45612	-1.386	-1.38956	-1.41897	-1.32266	-1.10038	-0.798565	-0.560587	-0.433898
-0.746868	-0.537839	-0.336368	-0.159563	-0.0825031	-0.097254	-0.10868	-0.194069	-0.27759	-0.36729	-0.40548	-0.40613	-0.376032	-0.405073	-0.419202	-0.433085	-0.428635	-0.304343	-0.201579	-0.158672	-0.226566	-0.277408	-0.306707	-0.271141	-0.191413	-0.0953003	0.00550117	0.0780084	0.161092	0.25418	0.374694	0.435903	0.460879	0.453735	0.469286	0.49781	0.591786	0.723439	0.85154	0.918459	0.89926	0.850616	0.783762	0.714987	0.607622	0.47325	0.339158	0.248354	0.198387	0.153168
0.0426446	-0.0508261	-0.105263	-0.0769988	-0.0465939	-0.0102569	-0.00903918	0.00147311	0.0604131	0.195526	0.314576	0.346898	0.234856	0.0460172	-0.130947	-0.230985	-0.207372	-0.178602	-0.173689	-0.227125	-0.31246	-0.3705	-0.341948	-0.214611	-0.0398174	0.0547491	0.0424068	-0.0455225	-0.119929	-0.118942	0.00096168	0.137486	0.212648	0.157892	0.0552319	-0.0595657	-0.0808836	-0.0095915	0.0855044	0.146096	0.154243	0.136417	0.129239	0.121216	0.111457	0.0825714	0.00362485	-0.100159	-0.221183	-0.347186
-0.79616	-0.729449	-0.643786	-0.523454	-0.449519	-0.45523	-0.468611	-0.492202	-0.518127	-0.479674	-0.398323	-0.353435	-0.371548	-0.484324	-0.628758	-0.776171	-0.871102	-0.887938	-0.893861	-0.939033	-0.964742	-0.917379	-0.801397	-0.59539	-0.393276	-0.262202	-0.237039	-0.377409	-0.60222	-0.80158	-0.835321	-0.748875	-0.611068	-0.560683	-0.64586	-0.802802	-0.912332	-0.891171	-0.853261	-0.878523	-1.0745	-1.31572	-1.47034	-1.45873	-1.2607	-1.04309	-0.887956	-0.850825	-0.868442	-0.934438
-1.12681	-1.02539	-0.882641	-0.714105	-0.491535	-0.286994	-0.159493	-0.135017	-0.27156	-0.490242	-0.684167	-0.716988	-0.632899	-0.498849	-0.449837	-0.532692	-0.685356	-0.791899	-0.771316	-0.734439	-0.759013	-0.949644	-1.18429	-1.3347	-1.3234	-1.13077	-0.919088	-0.768188	-0.73207	-0.749207	-0.813403	-0.796723	-0.763677	-0.659971	-0.499371	-0.403051	-0.420882	-0.618985	-0.895312	-1.10121	-1.14475	-0.978884	-0.636302	-0.300946	-0.154565	-0.125266	-0.190848	-0.263905	-0.264145	-0.193256
0.155521	0.29069	0.421871	0.511292	0.541518	0.576731	0.608935	0.550926	0.431256	0.295233	0.111002	-0.0344092	-0.185846	-0.313102	-0.502679	-0.722466	-0.90118	-0.92869	-0.788021	-0.528282	-0.229529	0.0393709	0.157309	0.130902	0.032788	-0.0977697	-0.154919	-0.141585	-0.0818207	0.0198481	0.116176	0.164677	0.121198	-0.000118897	-0.14411	-0.275532	-0.278101	-0.203693	-0.0672587	0.0176137	0.0388557	0.0184127	-0.0214484	-0.0349731	-0.0313302	0.0708478	0.205869	0.392173	0.541799	0.649244
-0.221436	-0.402845	-0.622803	-0.822833	-0.971081	-1.06827	-1.09799	-1.02577	-0.924564	-0.83159	-0.825667	-0.849453	-0.933134	-0.999006	-1.01283	-0.957447	-0.884386	-0.727017	-0.547918	-0.428876	-0.358053	-0.362274	-0.387223	-0.463445	-0.603795	-0.761526	-0.944249	-1.07255	-1.07953	-1.02457	-0.961473	-0.928384	-0.921431	-0.950494	-0.968336	-0.999338	-0.996711	-0.994463	-0.923116	-0.77595	-0.580348	-0.381663	-0.260136	-0.213801	-0.216056	-0.15722	-0.0165588	0.164276	0.372609	0.592003
-0.740393	-0.727375	-0.67136	-0.60997	-0.450496	-0.268808	-0.140787	-0.0646227	-0.0691617	-0.0959927	-0.177964	-0.328899	-0.498528	-0.695033	-0.833011	-0.840521	-0.781411	-0.713556	-0.677971	-0.670494	-0.701749	-0.720937	-0.754277	-0.751452	-0.749034	-0.672306	-0.514039	-0.303684	-0.0900135	0.0406804	0.0905095	0.0880854	0.151359	0.302629	0.497104	0.721151	0.957093	1.15777	1.33771	1.56189	1.78397	1.91631	1.93843	1.83365	1.62318	1.40175	1.26241	1.27647	1.36018	1.43267
-0.304217	-0.241001	-0.260927	-0.380858	-0.662296	-0.961308	-1.20868	-1.33371	-1.36275	-1.32799	-1.2574	-1.13814	-0.943957	-0.74387	-0.612476	-0.626959	-0.687579	-0.744993	-0.826777	-0.941676	-1.05039	-1.11863	-1.11079	-1.04486	-0.942121	-0.791909	-0.595229	-0.305498	-0.0321062	0.105304	0.0600934	-0.0774533	-0.149423	-0.0313889	0.267858	0.558254	0.737605	0.784202	0.79551	0.850871	0.936735	0.974258	0.94531	0.913029	0.962464	1.06001	1.19732	1.31207	1.34049	1.2858
-0.51988	-0.728879	-1.00174	-1.18703	-1.20404	-0.948878	-0.569022	-0.293855	-0.210052	-0.296043	-0.535976	-0.803176	-0.934989	-0.954115	-0.772291	-0.408521	-0.0861845	0.116478	0.112557	-0.0548841	-0.290637	-0.483305	-0.574276	-0.459601	-0.241983	-0.00655291	0.20125	0.265154	0.193281	0.0574632	0.00871008	0.16261	0.499287	0.85042	1.08078	1.11866	0.984892	0.773048	0.514298	0.37388	0.392979	0.430301	0.466535	0.422975	0.331682	0.27097	0.266399	0.362103	0.553238	0.829379
0.114059	0.0228908	-0.114818	-0.261063	-0.369363	-0.358465	-0.305086	-0.248537	-0.23519	-0.294461	-0.323827	-0.361536	-0.370565	-0.407326	-0.401507	-0.36509	-0.333142	-0.292714	-0.222797	-0.14625	-0.120326	-0.165388	-0.278863	-0.446538	-0.661703	-0.860482	-0.997626	-1.03807	-1.02531	-0.970664	-0.892666	-0.76374	-0.634442	-0.449583	-0.231115	0.0320494	0.264028	0.42568	0.479946	0.485106	0.469873	0.478011	0.438834	0.307666	0.0950779	-0.102857	-0.207212	-0.162221	-0.0576683	0.069811
-0.352408	-0.294597	-0.238139	-0.120984	0.0152876	0.117385	0.145501	0.143112	0.179665	0.324419	0.539576	0.792804	0.976929	0.997537	0.843437	0.641526	0.483162	0.445386	0.526792	0.638945	0.659204	0.531139	0.301014	0.0965438	-0.0233006	-0.0948931	-0.139881	-0.203966	-0.289428	-0.367907	-0.414856	-0.468223	-0.403433	-0.216433	0.123464	0.515327	0.794694	0.947754	1.01542	0.98839	0.893115	0.777545	0.640549	0.520962	0.381818	0.24908	0.0913438	0.0112816	0.0251085	0.207073
0.247755	0.204524	0.237432	0.344854	0.530108	0.764323	1.03678	1.33659	1.5498	1.75244	1.92255	2.0877	2.19088	2.17663	2.05486	1.77241	1.40998	1.04491	0.821141	0.731979	0.782435	0.980383	1.28328	1.68557	2.03625	2.23658	2.29692	2.25242	2.17931	2.09583	2.04292	1.945	1.90309	1.87711	1.8163	1.67092	1.42822	1.20724	0.983605	0.837008	0.705478	0.616808	0.598474	0.602555	0.686562	0.805652	0.92143	1.01413	1.09144	1.14907
-1.31657	-1.25261	-1.11345	-0.915334	-0.726426	-0.626536	-0.602531	-0.586316	-0.623405	-0.70553	-0.776774	-0.798632	-0.789211	-0.732656	-0.682777	-0.665953	-0.756946	-0.876256	-0.956746	-1.01485	-1.01412	-0.933932	-0.7021	-0.36388	-0.0328749	0.240743	0.442432	0.615113	0.763896	0.904715	0.909103	0.786178	0.601034	0.450075	0.446364	0.598183	0.776845	0.872766	0.841363	0.857651	0.877069	0.972598	1.03478	1.13773	1.21353	1.23223	1.20918	1.25705	1.43787	1.69555
-1.04672	-1.10003	-1.19928	-1.33393	-1.42796	-1.48695	-1.4947	-1.4656	-1.37062	-1.22772	-1.10384	-1.05684	-1.07122	-1.04542	-0.969209	-0.793914	-0.596247	-0.479369	-0.424758	-0.367645	-0.301292	-0.200896	-0.157151	-0.153321	-0.139029	-0.081777	0.050614	0.262981	0.469844	0.575909	0.583692	0.467968	0.349721	0.206614	0.19867	0.350413	0.646592	0.940005	1.10505	1.14304	1.11491	1.1223	1.19094	1.35815	1.45936	1.39525	1.10319	0.693917	0.291818	-0.0278939
-0.512393	-0.393284	-0.362286	-0.44064	-0.580651	-0.760658	-0.931839	-0.981462	-0.957661	-0.894179	-0.817546	-0.733813	-0.676323	-0.686032	-0.783258	-0.901482	-0.968628	-0.944602	-0.799228	-0.607095	-0.426454	-0.284345	-0.227956	-0.247521	-0.349979	-0.447843	-0.539844	-0.566053	-0.492978	-0.382725	-0.245396	-0.152684	-0.0951919	-0.0364352	-0.0237327	-0.069585	-0.207147	-0.449316	-0.657228	-0.666353	-0.547305	-0.347623	-0.145121	-0.0399797	-0.0342536	-0.098913	-0.180647	-0.322765	-0.538309	-0.774049
-0.437626	-0.551354	-0.609657	-0.599774	-0.58217	-0.604515	-0.697397	-0.810339	-0.874484	-0.851531	-0.712654	-0.529106	-0.356536	-0.220778	-0.166909	-0.185599	-0.283479	-0.37697	-0.46486	-0.489898	-0.420088	-0.314762	-0.183569	-0.0949994	-0.0400766	0.0160546	0.0281895	-0.0156139	-0.147029	-0.378377	-0.576999	-0.585716	-0.471987	-0.281228	-0.0877747	0.0126685	0.0181387	-0.0436314	-0.121714	-0.257481	-0.463394	-0.688599	-0.803873	-0.81019	-0.749442	-0.642776	-0.529344	-0.390194	-0.224933	-0.0334914
0.423789	0.587093	0.71598	0.802344	0.812994	0.742831	0.51621	0.192854	-0.169664	-0.456446	-0.679422	-0.880388	-1.09636	-1.26391	-1.23561	-1.02135	-0.743077	-0.505874	-0.377518	-0.432949	-0.547111	-0.665592	-0.683935	-0.549646	-0.342209	-0.106604	0.102813	0.227154	0.187556	-0.0143719	-0.358586	-0.760019	-1.11568	-1.359	-1.48339	-1.49784	-1.51012	-1.5245	-1.49675	-1.39568	-1.17973	-0.88188	-0.582295	-0.360577	-0.231132	-0.220781	-0.222312	-0.245598	-0.31083	-0.325263
-0.895703	-0.82236	-0.834474	-0.916038	-1.07666	-1.22037	-1.19416	-0.995789	-0.738144	-0.518528	-0.399689	-0.45101	-0.556708	-0.666405	-0.683388	-0.559055	-0.366999	-0.148862	0.0450282	0.16015	0.123488	-0.063468	-0.382161	-0.75383	-1.08312	-1.3084	-1.42357	-1.43695	-1.44831	-1.46163	-1.43594	-1.34236	-1.14242	-0.866656	-0.589283	-0.384004	-0.264157	-0.254573	-0.255991	-0.27755	-0.337946	-0.351309	-0.262685	-0.0452367	0.29716	0.615614	0.811735	0.805032	0.653286	0.428253
-0.552401	-0.717105	-0.878607	-0.997609	-1.11734	-1.21061	-1.29083	-1.33842	-1.3389	-1.31777	-1.34336	-1.32383	-1.29054	-1.23148	-1.09405	-0.913544	-0.69524	-0.531333	-0.446824	-0.426694	-0.442497	-0.403711	-0.296462	-0.152297	-0.0805714	-0.0644166	-0.193026	-0.320795	-0.438277	-0.481823	-0.496802	-0.531001	-0.571726	-0.623535	-0.662329	-0.688588	-0.779205	-0.95966	-1.09388	-1.14109	-1.06051	-0.903177	-0.741515	-0.637349	-0.651585	-0.749397	-0.947169	-1.17688	-1.32935	-1.38753
-0.0400373	0.156281	0.345261	0.465823	0.471353	0.400288	0.32976	0.276908	0.266984	0.282355	0.272927	0.175226	0.0217556	-0.198048	-0.437723	-0.628923	-0.689974	-0.554493	-0.258906	0.0143175	0.160951	0.187189	0.0771314	-0.00588307	-0.0161827	0.121748	0.26378	0.33903	0.286783	0.151335	-0.0569686	-0.269722	-0.413166	-0.477486	-0.436469	-0.371975	-0.31338	-0.269502	-0.231483	-0.235715	-0.268401	-0.36156	-0.402975	-0.35599	-0.181905	0.053204	0.273099	0.368004	0.362743	0.30734
0.526406	0.359494	0.164602	-0.0296827	-0.131148	-0.124319	-0.0306448	0.127439	0.253417	0.221961	0.0701195	-0.134249	-0.291527	-0.294604	-0.207246	-0.0622311	0.0493837	0.11094	0.105171	0.0714811	0.0302859	0.015069	0.0241343	0.0563104	0.120725	0.15477	0.147041	0.0608965	-0.025052	0.00390938	0.072643	0.191686	0.304066	0.387319	0.365382	0.275069	0.143663	0.0307682	-0.015362	-0.00606856	0.0529619	0.0636319	0.015638	-0.0475255	-0.114291	-0.154312	-0.24124	-0.330833	-0.415814	-0.444594
-0.0558033	-0.15844	-0.233111	-0.284357	-0.204067	0.0119853	0.353719	0.684114	0.941633	0.981058	0.804219	0.495392	0.240353	0.116483	0.153808	0.225871	0.311572	0.29136	0.140565	-0.0696253	-0.256302	-0.402824	-0.536024	-0.598968	-0.638579	-0.606932	-0.620333	-0.657163	-0.676286	-0.672884	-0.5862	-0.421773	-0.195142	-0.0439643	0.0451909	0.0113003	-0.0818745	-0.191889	-0.241447	-0.241717	-0.213562	-0.217679	-0.303185	-0.412189	-0.457233	-0.419894	-0.290525	-0.103616	0.0872817	0.194401
-0.563196	-0.428068	-0.29715	-0.124007	-0.00309578	0.0963088	0.0762328	-0.0735536	-0.282337	-0.467765	-0.613307	-0.745615	-0.808138	-0.847484	-0.816048	-0.829359	-0.865944	-0.884939	-0.881559	-0.795455	-0.632129	-0.407014	-0.256848	-0.168289	-0.201953	-0.294504	-0.403783	-0.453009	-0.453277	-0.425311	-0.4294	-0.514334	-0.622608	-0.667351	-0.630262	-0.501759	-0.316101	-0.12648	-0.020078	-0.0342322	-0.163995	-0.325284	-0.44917	-0.487718	-0.426157	-0.33515	-0.255363	-0.250471	-0.24167	-0.262685
-0.468078	-0.572725	-0.65029	-0.728976	-0.82584	-0.878081	-0.917258	-0.885957	-0.899211	-0.935637	-0.95455	-0.951185	-0.865454	-0.702834	-0.478693	-0.329177	-0.241001	-0.27452	-0.36667	-0.475476	-0.524489	-0.524756	-0.496911	-0.500982	-0.585548	-0.693355	-0.737904	-0.700975	-0.573028	-0.388173	-0.199373	-0.0934312	-0.107524	-0.236725	-0.397317	-0.520667	-0.559048	-0.497753	-0.40714	-0.327698	-0.322828	-0.314065	-0.334988	-0.329733	-0.26756	-0.199384	-0.220157	-0.310161	-0.379415	-0.35765
-1.07493	-0.972477	-0.837942	-0.70225	-0.582532	-0.52263	-0.500886	-0.52074	-0.491453	-0.493673	-0.54539	-0.599272	-0.568672	-0.470796	-0.348449	-0.27528	-0.243328	-0.231571	-0.194681	-0.147771	-0.0489454	-0.033709	-0.0905933	-0.150105	-0.194543	-0.218009	-0.242875	-0.272268	-0.25273	-0.200748	-0.119813	0.0389803	0.209226	0.304516	0.295134	0.237516	0.124668	-0.00274884	-0.078726	-0.0702748	-0.0116512	0.102964	0.199429	0.288123	0.366086	0.438347	0.47914	0.417507	0.325849	0.236071
-0.200931	-0.149002	-0.135269	-0.132454	-0.136912	-0.0979415	-0.0524252	0.0434654	0.0582492	0.00305451	-0.0546892	-0.0978076	-0.120577	-0.144704	-0.173224	-0.154266	-0.103829	-0.0252969	0.128779	0.293968	0.386427	0.377324	0.321418	0.211922	0.0882897	0.0145693	0.0227695	0.0796518	0.190863	0.284462	0.370522	0.446169	0.516283	0.555865	0.496063	0.407127	0.320016	0.282248	0.264518	0.293119	0.334073	0.339685	0.27993	0.210974	0.142055	0.0690855	0.0672675	0.14192	0.292058	0.451218
-0.132465	-0.145649	-0.0951809	-0.0443882	0.0544038	0.0704866	0.0151014	-0.0428416	-0.0861088	-0.108957	-0.133167	-0.161786	-0.142762	-0.0921505	-0.0133479	0.14126	0.307019	0.399797	0.390663	0.334564	0.224689	0.100631	0.0266559	0.0348843	0.091963	0.203558	0.29748	0.383837	0.459745	0.530102	0.56982	0.509811	0.420569	0.333156	0.295258	0.277467	0.306167	0.347262	0.352894	0.292932	0.223739	0.154582	0.0813602	0.0795359	0.154446	0.305102	0.464812	0.569904	0.544325	0.333342
0.751537	0.601398	0.423087	0.244517	0.107316	0.0487611	0.0783023	0.212963	0.409516	0.569898	0.580247	0.488271	0.321534	0.228512	0.236813	0.30386	0.362915	0.40387	0.453168	0.495737	0.586139	0.614794	0.620966	0.581946	0.486321	0.368036	0.284521	0.267373	0.338321	0.472031	0.589683	0.693713	0.690601	0.588845	0.476172	0.335584	0.199605	0.116814	0.0426576	0.0290316	0.0932052	0.243942	0.441871	0.603815	0.714581	0.734373	0.70263	0.581159	0.390049	0.158374
0.0587672	0.023415	0.0536953	0.180735	0.363455	0.516199	0.526639	0.433853	0.265648	0.171807	0.180181	0.247818	0.307393	0.348709	0.398441	0.441385	0.532583	0.56149	0.567716	0.528353	0.431886	0.312559	0.228309	0.21101	0.282583	0.417471	0.536158	0.641104	0.637965	0.535312	0.421647	0.279822	0.142645	0.0591255	-0.0156839	-0.02943	0.0353087	0.187373	0.387045	0.550415	0.662155	0.682122	0.650099	0.527559	0.334766	0.101051	-0.14765	-0.342876	-0.441719	-0.440217
-1.05077	-0.798102	-0.479684	-0.154559	0.117832	0.194378	0.0728972	-0.186917	-0.506604	-0.764585	-0.985939	-1.23638	-1.38935	-1.38464	-1.28866	-1.11286	-0.924057	-0.829518	-0.752563	-0.693335	-0.623897	-0.535711	-0.529476	-0.636173	-0.787035	-0.854205	-0.779559	-0.543857	-0.223157	0.0500659	0.199321	0.177354	0.0857263	-0.0292646	-0.139136	-0.235183	-0.363338	-0.54369	-0.757784	-0.930269	-0.924093	-0.809651	-0.603591	-0.396934	-0.28932	-0.307245	-0.393906	-0.492158	-0.500915	-0.398547
-0.0707089	-0.158881	-0.296534	-0.461996	-0.600765	-0.588787	-0.488971	-0.309248	-0.129003	-0.0351418	-0.0507766	-0.126361	-0.212057	-0.219694	-0.13041	0.0297235	0.201483	0.371325	0.543561	0.614392	0.561509	0.430528	0.283881	0.162554	0.0990797	0.059041	0.0115828	-0.0791709	-0.199446	-0.315907	-0.442173	-0.5703	-0.687351	-0.759967	-0.809361	-0.859437	-0.911948	-0.919117	-0.811644	-0.620379	-0.328732	-0.0558465	0.0979344	0.107242	0.0206145	-0.0486945	-0.0234662	0.134745	0.326682	0.470109
0.995842	0.934826	0.903629	0.825921	0.720832	0.526999	0.267986	-0.0224391	-0.283384	-0.506698	-0.580033	-0.507346	-0.425398	-0.314733	-0.300263	-0.331932	-0.374753	-0.306951	-0.0795578	0.260039	0.557913	0.677272	0.705018	0.678162	0.713797	0.860246	1.03616	1.11157	1.01622	0.774661	0.482407	0.226112	0.0668344	0.0184485	0.101231	0.204817	0.286491	0.248335	0.102857	-0.103747	-0.22172	-0.166959	-0.0388555	0.103863	0.136784	0.10294	-0.0415712	-0.180325	-0.244452	-0.135834
-1.02293	-0.845466	-0.635693	-0.497053	-0.372412	-0.351598	-0.383053	-0.425587	-0.358241	-0.132374	0.204941	0.500816	0.619373	0.646933	0.620257	0.655652	0.801118	0.975854	1.05076	0.95604	0.716108	0.425816	0.171242	0.0130348	-0.0350261	0.0472005	0.150091	0.231217	0.193316	0.0488154	-0.156401	-0.273582	-0.219189	-0.0919453	0.0498149	0.0825147	0.0488978	-0.0946428	-0.232465	-0.296161	-0.188272	-0.00236555	0.150841	0.184536	0.0711903	-0.0687646	-0.0967491	0.0476224	0.215836	0.310276
1.07939	0.907722	0.719424	0.4805	0.277868	0.0386762	-0.216469	-0.465775	-0.601971	-0.605937	-0.485231	-0.238294	0.0166451	0.283113	0.368128	0.283606	0.0833496	-0.109479	-0.186534	-0.0981337	0.0132199	0.0228731	-0.133333	-0.345521	-0.536876	-0.629534	-0.665534	-0.640221	-0.652158	-0.764573	-0.872778	-0.884556	-0.746265	-0.512465	-0.277228	-0.17827	-0.233734	-0.406382	-0.554361	-0.633706	-0.670671	-0.675232	-0.703001	-0.777204	-0.873571	-0.9528	-1.05319	-1.14652	-1.19458	-1.22491
-0.0844808	-0.0549805	-0.147265	-0.312161	-0.515948	-0.634428	-0.63831	-0.520153	-0.278432	-0.0288785	0.231961	0.31518	0.232444	0.0364171	-0.152338	-0.227766	-0.141233	-0.0322314	-0.022782	-0.175688	-0.383395	-0.570708	-0.661408	-0.696649	-0.67187	-0.683554	-0.793595	-0.899515	-0.911044	-0.775674	-0.546812	-0.316544	-0.219676	-0.273969	-0.442971	-0.587823	-0.665492	-0.701677	-0.706142	-0.733324	-0.805959	-0.900291	-0.977847	-1.07612	-1.16747	-1.21452	-1.24421	-1.27184	-1.19486	-1.03955
-0.656686	-0.698975	-0.725006	-0.785067	-0.853836	-0.888943	-0.915352	-0.939923	-0.871459	-0.733319	-0.61303	-0.561819	-0.532164	-0.510831	-0.471575	-0.44724	-0.476807	-0.605831	-0.753126	-0.830928	-0.802839	-0.705665	-0.522343	-0.370554	-0.337936	-0.448599	-0.655762	-0.875292	-1.02598	-1.07363	-1.01922	-0.862774	-0.74378	-0.633585	-0.587528	-0.569951	-0.610725	-0.690409	-0.780533	-0.811762	-0.766299	-0.597844	-0.370973	-0.241418	-0.202406	-0.262965	-0.347294	-0.425239	-0.486188	-0.576425
-0.498215	-0.483345	-0.531145	-0.631809	-0.736681	-0.801465	-0.758382	-0.615719	-0.461742	-0.237587	0.0130122	0.210953	0.312872	0.337433	0.349991	0.356449	0.424901	0.547674	0.653543	0.657816	0.54927	0.394021	0.291268	0.270676	0.273255	0.314036	0.303152	0.206563	0.0618233	-0.103182	-0.211052	-0.240199	-0.177262	-0.0231176	0.173615	0.334459	0.479532	0.619448	0.675693	0.699911	0.678849	0.553214	0.335234	0.13197	-0.0581034	-0.161984	-0.249129	-0.324787	-0.391928	-0.52599
-0.160071	-0.227745	-0.243538	-0.182255	-0.0372615	0.146312	0.304741	0.447636	0.585451	0.640852	0.664707	0.643961	0.520212	0.305504	0.105293	-0.0819277	-0.184248	-0.270086	-0.344608	-0.410741	-0.54279	-0.664441	-0.682151	-0.591043	-0.451763	-0.320317	-0.28501	-0.399023	-0.594958	-0.759966	-0.855269	-0.895985	-0.865294	-0.803957	-0.804224	-0.880327	-0.929793	-0.908181	-0.752824	-0.580294	-0.384919	-0.249028	-0.165706	-0.130548	-0.141924	-0.203018	-0.271929	-0.319407	-0.367022	-0.354447
0.151073	-0.0154907	-0.133274	-0.207617	-0.259979	-0.254807	-0.242152	-0.203267	-0.0766034	0.0605039	0.166669	0.251424	0.322626	0.384924	0.420979	0.418102	0.364986	0.237553	0.121853	6.98592e-05	-0.0687327	-0.137229	-0.178659	-0.18404	-0.139651	-0.0774169	0.0236089	0.149648	0.246512	0.299311	0.335316	0.395139	0.433815	0.482858	0.512897	0.570665	0.554448	0.387611	0.196326	0.0263696	-0.0407106	0.0281284	0.193071	0.372837	0.514611	0.615007	0.762265	0.846578	0.823694	0.716046
-0.176224	-0.203301	-0.189712	-0.176827	-0.144419	-0.0190509	0.119732	0.227194	0.312985	0.385057	0.448116	0.484612	0.4817	0.427935	0.298944	0.18183	0.0585593	-0.0110841	-0.0804171	-0.122354	-0.1278	-0.0828689	-0.0198744	0.082386	0.209966	0.308013	0.361457	0.397902	0.458456	0.497604	0.547247	0.577653	0.636127	0.619712	0.450836	0.257214	0.0851804	0.0172805	0.0869607	0.253919	0.435881	0.579388	0.681011	0.830068	0.915412	0.892248	0.783284	0.634087	0.589091	0.648595
0.293894	0.427345	0.522114	0.56967	0.576579	0.520745	0.389484	0.270309	0.144868	0.0739988	0.00344546	-0.0392295	-0.0447716	0.000950584	0.0650538	0.169114	0.298939	0.398712	0.453097	0.490184	0.551803	0.59164	0.642157	0.673098	0.732601	0.715897	0.544049	0.347019	0.171958	0.102863	0.173769	0.343666	0.528831	0.674863	0.778275	0.929955	1.0168	0.99323	0.882348	0.730525	0.684738	0.745288	0.926012	1.08434	1.27774	1.39661	1.43188	1.30156	1.04432	0.729381
-0.907992	-0.93508	-0.923803	-0.837515	-0.682076	-0.426028	-0.143903	0.0321186	0.106614	0.0183997	-0.142338	-0.309466	-0.537427	-0.807006	-1.05911	-1.24805	-1.29493	-1.18301	-0.969108	-0.806123	-0.712552	-0.659138	-0.577517	-0.443593	-0.311385	-0.227865	-0.267467	-0.398219	-0.553642	-0.678405	-0.821062	-0.976387	-1.07175	-1.0662	-1.00165	-0.910427	-0.865459	-0.906849	-1.0595	-1.28617	-1.49041	-1.58032	-1.46884	-1.17621	-0.806167	-0.468193	-0.205848	-0.0169197	0.120643	0.187258
-0.108353	0.0184494	0.0751766	0.0232245	-0.09973	-0.237915	-0.351069	-0.480453	-0.621325	-0.707818	-0.702778	-0.644236	-0.561503	-0.520718	-0.558257	-0.696707	-0.902287	-1.08752	-1.16907	-1.06796	-0.802553	-0.466943	-0.160416	0.0775186	0.248868	0.373631	0.434047	0.382761	0.280454	0.121819	-0.0457386	-0.227846	-0.382109	-0.467341	-0.48156	-0.401969	-0.275923	-0.171946	-0.162932	-0.205054	-0.302125	-0.41405	-0.479491	-0.482897	-0.436898	-0.38946	-0.331069	-0.269137	-0.177727	-0.0446872
-0.174967	-0.381476	-0.570152	-0.677642	-0.681299	-0.626837	-0.543587	-0.502548	-0.540321	-0.679635	-0.886499	-1.07289	-1.15495	-1.05321	-0.786143	-0.448437	-0.139996	0.0994243	0.271843	0.397385	0.458179	0.406573	0.303627	0.144002	-0.0246025	-0.207847	-0.363073	-0.448837	-0.463145	-0.383057	-0.256224	-0.151598	-0.142528	-0.184913	-0.28259	-0.395213	-0.461063	-0.464491	-0.418204	-0.37047	-0.311714	-0.249395	-0.157415	-0.0235445	0.106395	0.183381	0.214333	0.154016	-0.00793998	-0.193551
-0.406647	-0.478884	-0.625742	-0.834067	-1.05475	-1.21172	-1.22366	-1.11431	-0.943931	-0.749571	-0.557605	-0.433815	-0.351922	-0.334916	-0.358473	-0.480005	-0.609696	-0.658748	-0.610898	-0.491004	-0.41288	-0.449873	-0.584091	-0.766382	-0.86974	-0.805494	-0.674391	-0.599908	-0.578497	-0.62606	-0.630498	-0.608557	-0.593985	-0.638951	-0.726059	-0.760695	-0.80827	-0.878422	-1.00849	-1.11294	-1.18159	-1.19564	-1.15556	-1.07382	-1.00454	-0.989398	-0.942568	-0.825593	-0.701495	-0.61565
-0.618768	-0.529124	-0.444823	-0.389135	-0.380604	-0.337067	-0.202996	-0.0607605	0.0376302	0.11579	0.113836	0.0359477	-0.0486722	-0.0795331	-0.0195284	0.124266	0.233757	0.264557	0.151966	0.00886002	-0.126105	-0.233544	-0.253177	-0.293326	-0.376944	-0.453641	-0.454133	-0.346728	-0.127729	0.137405	0.33904	0.361308	0.203132	-0.0951592	-0.433544	-0.69312	-0.805495	-0.80986	-0.750607	-0.721803	-0.644185	-0.614774	-0.600271	-0.547548	-0.45302	-0.365808	-0.232604	-0.113705	-0.100868	-0.245451
-1.3137	-1.19326	-1.0384	-0.921456	-0.895191	-0.972232	-1.12291	-1.31849	-1.53479	-1.7563	-1.87949	-1.90398	-1.84242	-1.69526	-1.49232	-1.31678	-1.16381	-1.10332	-1.12394	-1.1524	-1.21265	-1.22502	-1.21795	-1.14519	-1.03588	-0.903326	-0.81957	-0.794012	-0.833684	-0.912836	-1.00925	-1.19595	-1.40368	-1.56169	-1.55251	-1.37974	-1.10031	-0.810739	-0.602827	-0.527521	-0.542175	-0.609188	-0.740882	-0.900786	-1.0797	-1.24104	-1.35276	-1.39646	-1.35286	-1.25134
-0.18129	-0.234489	-0.29507	-0.376282	-0.543424	-0.741009	-0.89441	-0.885494	-0.717766	-0.446489	-0.165361	0.0364854	0.109595	0.0953689	0.0303107	-0.0975424	-0.252782	-0.426478	-0.583107	-0.69157	-0.733998	-0.691664	-0.593112	-0.503339	-0.369062	-0.24492	-0.207318	-0.274959	-0.433917	-0.63631	-0.79446	-0.792575	-0.675035	-0.503768	-0.386057	-0.403116	-0.587562	-0.855537	-1.08287	-1.20022	-1.16921	-1.00065	-0.745393	-0.49989	-0.330584	-0.262826	-0.282358	-0.373838	-0.451018	-0.501435
1.00655	0.934382	0.865661	0.901189	0.986845	1.08739	1.13857	1.19993	1.1838	1.06825	0.942844	0.859203	0.835954	0.864142	0.932408	0.917135	0.828986	0.678566	0.559102	0.498754	0.435013	0.441442	0.531074	0.668526	0.808891	0.920306	0.926042	0.864972	0.795821	0.745839	0.644555	0.55825	0.515747	0.500014	0.512252	0.523095	0.525143	0.425633	0.214387	-0.062786	-0.299704	-0.429784	-0.416044	-0.293702	-0.162909	-0.0626212	-0.020876	0.0616177	0.152348	0.251216
-0.105208	-0.248106	-0.368696	-0.497329	-0.611808	-0.654291	-0.667325	-0.640328	-0.616407	-0.672475	-0.841244	-1.08463	-1.36478	-1.54233	-1.5599	-1.42315	-1.107	-0.785235	-0.518198	-0.351954	-0.288088	-0.24174	-0.246003	-0.243354	-0.240807	-0.292269	-0.329713	-0.343025	-0.422933	-0.500371	-0.634562	-0.756948	-0.808046	-0.719705	-0.565421	-0.426525	-0.336278	-0.325642	-0.419006	-0.611411	-0.806552	-0.987152	-1.12984	-1.28813	-1.40362	-1.39551	-1.30186	-1.09186	-0.88416	-0.782148
0.0928837	-0.113421	-0.252685	-0.231694	-0.0735282	0.143231	0.314696	0.436808	0.489297	0.51489	0.538726	0.548749	0.511852	0.393475	0.201905	0.0457312	-0.108239	-0.177375	-0.163596	-0.0714796	0.0620828	0.147475	0.163146	0.0630816	-0.0281925	-0.0975244	-0.0712951	0.0241837	0.115094	0.142227	0.147598	0.174816	0.228347	0.279527	0.306887	0.267298	0.195237	0.161411	0.198985	0.338062	0.508185	0.657359	0.663528	0.582154	0.478204	0.408903	0.374455	0.421344	0.499269	0.531219
0.511334	0.555154	0.519001	0.413357	0.269038	0.155226	0.158925	0.22872	0.327168	0.410808	0.48829	0.522354	0.550484	0.59865	0.637022	0.586989	0.419687	0.164216	-0.192281	-0.51732	-0.760649	-0.847226	-0.791324	-0.606546	-0.316985	0.0568775	0.390923	0.558725	0.518386	0.329823	0.0772244	-0.127225	-0.210764	-0.165785	-0.0521437	0.0306315	0.0663637	0.1054	0.126933	0.144242	0.126884	-0.0330328	-0.313986	-0.615682	-0.87026	-1.0348	-1.08608	-1.06571	-0.989329	-0.855553
-0.0899396	-0.0731544	0.0182818	0.12754	0.238187	0.320907	0.399647	0.434264	0.46285	0.511797	0.550792	0.499947	0.32993	0.0703133	-0.291968	-0.622282	-0.869559	-0.957541	-0.900732	-0.712955	-0.418695	-0.0387665	0.3007	0.471225	0.430231	0.238608	-0.0180894	-0.225856	-0.310751	-0.265042	-0.149557	-0.0654384	-0.0291264	0.0105433	0.0324257	0.0500162	0.0323764	-0.130136	-0.415648	-0.72224	-0.980949	-1.14816	-1.20027	-1.17957	-1.10195	-0.966003	-0.831486	-0.705781	-0.590595	-0.466587
0.446685	0.245777	0.122773	0.109978	0.184189	0.235754	0.150371	-0.0723783	-0.370208	-0.630228	-0.796437	-0.831602	-0.737044	-0.567926	-0.439219	-0.375723	-0.448321	-0.594209	-0.715658	-0.78019	-0.764498	-0.675965	-0.560861	-0.404397	-0.189294	0.0875135	0.369021	0.621337	0.810778	0.9399	1.0034	1.03854	1.03685	1.00109	0.943016	0.912774	0.924621	0.937901	0.987902	1.02814	0.993446	0.903042	0.792765	0.691781	0.579913	0.495256	0.483577	0.585042	0.715914	0.953242
1.36853	1.18351	0.992085	0.787559	0.613541	0.505645	0.480512	0.497655	0.493874	0.472665	0.472661	0.457678	0.429125	0.357187	0.281578	0.244543	0.279245	0.372074	0.400105	0.372279	0.255717	0.146615	0.103628	0.203112	0.387098	0.60274	0.721881	0.722919	0.644636	0.516188	0.377659	0.280512	0.282607	0.357262	0.411781	0.38055	0.243288	0.0573879	-0.0799702	-0.121001	-0.107006	-0.0587206	-0.041085	-0.0183403	0.0488773	0.115769	0.197214	0.266179	0.232278	0.11381
-0.189415	-0.14821	-0.116463	-0.0834633	-0.044736	-0.0134576	0.00771446	0.0171232	0.00587978	-0.0447963	-0.202593	-0.390859	-0.486916	-0.458494	-0.309457	-0.0974064	0.104522	0.187621	0.157648	0.0403905	-0.0978051	-0.219019	-0.266948	-0.280878	-0.284679	-0.267464	-0.349854	-0.461988	-0.593681	-0.705481	-0.760071	-0.767538	-0.711729	-0.636576	-0.549632	-0.475653	-0.360052	-0.257682	-0.232109	-0.343704	-0.526812	-0.71211	-0.820524	-0.815172	-0.697344	-0.46127	-0.212644	-0.0031626	0.139222	0.21106
0.159505	0.26942	0.407574	0.633472	0.915429	1.19961	1.36192	1.32699	1.15987	0.949564	0.813261	0.805382	0.894737	0.998154	1.01252	0.900797	0.748455	0.580724	0.449828	0.390737	0.375269	0.305422	0.151012	-0.00888788	-0.086797	-0.0682426	0.0185683	0.129908	0.236284	0.26355	0.288574	0.331131	0.42372	0.494087	0.50554	0.43832	0.311607	0.179825	0.159241	0.222773	0.362937	0.509294	0.585016	0.585743	0.578924	0.606011	0.653521	0.650562	0.57658	0.444264
0.900132	0.883873	0.800391	0.69727	0.567515	0.39037	0.172576	-0.023034	-0.0863101	-0.0534505	0.0763528	0.194397	0.186794	0.0863607	-0.0276301	-0.0420935	0.0488619	0.160407	0.246583	0.296817	0.365304	0.479453	0.629537	0.718227	0.69379	0.496391	0.215868	-0.0353307	-0.186552	-0.162188	-0.0236101	0.168187	0.313797	0.389187	0.350911	0.241285	0.139202	0.0840736	0.100741	0.14118	0.151241	0.0928027	0.0283731	-0.0287222	-0.00108982	0.0618666	0.109576	0.209536	0.293714	0.333028
1.02712	0.937161	0.780948	0.510914	0.199418	-0.0659705	-0.223577	-0.198184	-0.0537551	0.14614	0.297898	0.376471	0.336579	0.222325	0.115931	0.0584752	0.0758466	0.117993	0.128478	0.0675728	0.000422887	-0.059083	-0.030284	0.0353305	0.0850546	0.189235	0.276967	0.317941	0.369724	0.358766	0.340689	0.279622	0.253351	0.268708	0.281304	0.270281	0.27197	0.236225	0.267435	0.425272	0.642383	0.855819	0.964444	0.950731	0.902536	0.808598	0.747889	0.616067	0.387949	0.118388
0.376045	0.296017	0.2135	0.148807	0.149808	0.169083	0.192904	0.135429	0.0536537	0.0631111	0.145119	0.279098	0.332998	0.307268	0.146452	-0.043982	-0.154559	-0.115228	0.018546	0.161304	0.293987	0.354246	0.401767	0.428066	0.446482	0.468641	0.526166	0.622512	0.689762	0.703997	0.632179	0.431335	0.168299	-0.0374395	-0.139274	-0.195808	-0.297809	-0.485829	-0.777628	-1.08269	-1.33464	-1.46902	-1.46109	-1.24876	-1.00164	-0.837544	-0.814403	-0.860768	-0.932148	-0.967128
-1.62633	-1.71058	-1.73487	-1.66669	-1.42056	-1.15614	-0.980901	-0.956189	-1.0057	-1.08193	-1.11928	-1.17531	-1.23583	-1.24091	-1.22015	-1.13904	-0.992528	-0.929552	-0.920257	-0.909509	-0.853378	-0.805181	-0.825944	-0.884932	-0.978818	-1.06059	-1.14545	-1.22429	-1.29023	-1.36267	-1.34588	-1.20909	-0.956071	-0.728938	-0.533808	-0.452027	-0.394044	-0.359841	-0.338794	-0.361448	-0.419726	-0.543953	-0.650711	-0.635954	-0.494392	-0.262589	0.0191193	0.23407	0.311742	0.314054
1.32496	1.16597	1.04475	0.93298	0.800501	0.666248	0.488882	0.34893	0.26383	0.230663	0.18078	0.0588278	-0.175584	-0.413634	-0.542987	-0.552398	-0.414762	-0.204685	-0.070489	-0.0256463	-0.122376	-0.314375	-0.504681	-0.709651	-0.896475	-0.989904	-0.979317	-0.893086	-0.743401	-0.659662	-0.660648	-0.702929	-0.76781	-0.798241	-0.698159	-0.559937	-0.449325	-0.443018	-0.529409	-0.662209	-0.789829	-0.815168	-0.762587	-0.668127	-0.633296	-0.637522	-0.696078	-0.767878	-0.844056	-0.878473
-0.627425	-0.812701	-0.98757	-1.12122	-1.15614	-1.07599	-0.92348	-0.786164	-0.65028	-0.530004	-0.424274	-0.354059	-0.349294	-0.464269	-0.631866	-0.812879	-0.917441	-0.906736	-0.875928	-0.861137	-0.902	-0.913232	-0.887311	-0.799782	-0.61044	-0.471564	-0.49292	-0.644121	-0.861146	-1.05663	-1.16513	-1.18844	-1.09971	-0.985559	-0.907469	-0.890209	-0.947721	-0.984671	-0.942662	-0.802038	-0.653136	-0.571525	-0.618363	-0.699277	-0.823244	-0.96428	-1.13053	-1.25695	-1.25829	-1.10343
-0.275368	-0.267409	-0.194728	-0.0457789	0.240008	0.621768	0.968683	1.1984	1.17423	0.984299	0.740257	0.606807	0.653043	0.776954	0.891231	0.939877	0.961848	1.01762	1.16077	1.31929	1.34439	1.14487	0.792108	0.356405	-0.00135461	-0.194954	-0.189727	-0.0391491	0.126471	0.317168	0.495728	0.688182	0.866041	0.960463	0.864947	0.631839	0.360359	0.188421	0.109873	0.09929	0.0721166	-0.00922467	-0.121267	-0.20669	-0.0989383	0.153766	0.4778	0.729462	0.777718	0.662973
-0.957132	-0.788236	-0.575578	-0.340198	-0.150861	0.0436765	0.218718	0.407379	0.581733	0.674295	0.580661	0.352147	0.086016	-0.0825331	-0.159534	-0.169908	-0.196546	-0.276285	-0.38612	-0.469859	-0.36423	-0.116505	0.201143	0.447846	0.495151	0.382667	0.220289	0.12787	0.0571021	-0.0160535	-0.11011	-0.160386	-0.153542	-0.100935	-0.0162064	0.128436	0.339769	0.49104	0.516213	0.328448	-0.0142314	-0.379859	-0.577698	-0.647404	-0.654764	-0.631218	-0.579417	-0.513799	-0.505451	-0.475707
-0.00947677	0.0519639	0.169021	0.297993	0.463366	0.632082	0.723317	0.631025	0.405784	0.143465	-0.0226701	-0.0985677	-0.108794	-0.13505	-0.213646	-0.321908	-0.404448	-0.300332	-0.0561556	0.256943	0.500112	0.54674	0.435866	0.275814	0.184719	0.114965	0.0428573	-0.0498517	-0.0994075	-0.0926614	-0.040808	0.0427065	0.185277	0.393583	0.542687	0.5675	0.382424	0.0446533	-0.315737	-0.510742	-0.57945	-0.586705	-0.563495	-0.512436	-0.447758	-0.43953	-0.410213	-0.410552	-0.426193	-0.497757
-0.680718	-0.483081	-0.285388	-0.13782	-0.0922193	-0.0703175	-0.0242028	0.0192699	-0.0108779	-0.0878558	-0.183351	-0.314927	-0.41043	-0.368647	-0.298469	-0.256129	-0.269377	-0.322911	-0.383644	-0.414668	-0.361536	-0.205003	0.0685425	0.327926	0.498724	0.584538	0.467631	0.267616	-0.00744861	-0.245689	-0.38789	-0.452065	-0.434285	-0.366775	-0.262974	-0.183965	-0.111597	-0.153403	-0.201469	-0.266224	-0.34213	-0.347069	-0.285984	-0.102259	0.0791254	0.239672	0.274736	0.203913	0.0730028	-0.0675604
-0.501415	-0.361098	-0.220574	-0.11899	-0.0482871	-0.077563	-0.122242	-0.182436	-0.252995	-0.257586	-0.200804	-0.0300212	0.138585	0.287822	0.320417	0.254583	0.132894	0.00223281	-0.0435775	0.00140389	0.10494	0.188029	0.217277	0.120184	-0.0731519	-0.30142	-0.440719	-0.421083	-0.323174	-0.161918	-0.0721058	-0.0903655	-0.165571	-0.226034	-0.199372	-0.130436	-0.0617177	0.0229523	0.112417	0.160137	0.0649893	-0.231687	-0.610548	-0.927084	-1.06607	-1.02909	-0.970168	-0.894806	-0.879327	-0.917432
-0.639833	-0.649971	-0.629416	-0.543299	-0.469567	-0.36476	-0.25679	-0.169532	-0.107002	-0.070104	-0.0220516	-0.0274715	-0.0458159	-0.0820391	-0.100254	-0.094227	-0.136233	-0.251329	-0.414337	-0.565221	-0.66907	-0.7048	-0.69063	-0.592867	-0.425691	-0.258812	-0.17785	-0.23635	-0.484851	-0.771451	-0.976411	-1.03427	-0.970003	-0.870298	-0.784489	-0.743304	-0.780484	-0.866586	-0.943769	-1.01353	-1.0747	-1.12544	-1.19863	-1.25937	-1.32452	-1.36337	-1.36367	-1.37648	-1.41194	-1.39455
0.0512537	0.181591	0.25379	0.291349	0.274001	0.238623	0.209794	0.223954	0.264217	0.300653	0.339712	0.331843	0.307821	0.301931	0.36219	0.48478	0.591532	0.585701	0.412383	0.14291	-0.0804889	-0.154034	-0.0897753	0.0128782	0.115302	0.164384	0.199128	0.232031	0.263858	0.300617	0.320145	0.378689	0.421309	0.383933	0.220983	0.0181644	-0.210785	-0.421594	-0.55312	-0.590957	-0.588555	-0.585967	-0.618163	-0.6605	-0.695341	-0.714872	-0.660608	-0.530188	-0.396068	-0.28098
0.144794	0.113063	0.0759391	0.0751586	0.103516	0.140352	0.186035	0.210303	0.28306	0.336027	0.289577	0.0870696	-0.164986	-0.449516	-0.711501	-0.874956	-0.921979	-0.918994	-0.915778	-0.95579	-1.0084	-1.0517	-1.07598	-1.00854	-0.846457	-0.679778	-0.536752	-0.436044	-0.401584	-0.426206	-0.544741	-0.672976	-0.778084	-0.938033	-1.07687	-1.14142	-1.04949	-0.902178	-0.826869	-0.907889	-1.11734	-1.28543	-1.36081	-1.26717	-1.02325	-0.741312	-0.477686	-0.334227	-0.288946	-0.357915
0.208963	0.195603	0.203407	0.204053	0.266024	0.316244	0.268807	0.0619905	-0.195427	-0.486011	-0.753569	-0.920501	-0.968525	-0.965476	-0.962192	-1.00305	-1.05679	-1.10101	-1.1258	-1.05693	-0.891396	-0.721171	-0.575102	-0.472252	-0.437059	-0.462204	-0.583261	-0.714225	-0.821568	-0.98492	-1.12671	-1.19264	-1.09875	-0.948303	-0.871392	-0.954135	-1.16804	-1.33971	-1.41669	-1.32106	-1.07195	-0.784014	-0.51478	-0.368269	-0.322024	-0.392461	-0.512594	-0.6058	-0.658052	-0.678553
-0.208913	-0.494542	-0.781037	-0.952091	-1.01647	-0.929572	-0.706152	-0.447914	-0.206448	-0.0750482	-0.0335733	-0.0967452	-0.204488	-0.288081	-0.334944	-0.353331	-0.37831	-0.372077	-0.318147	-0.223019	-0.114351	0.00927333	0.115297	0.146427	0.14458	0.0385974	-0.118576	-0.333594	-0.465172	-0.461637	-0.345235	-0.220645	-0.152676	-0.221561	-0.371583	-0.597114	-0.786608	-0.915295	-0.886701	-0.731812	-0.517496	-0.344236	-0.259986	-0.297725	-0.391368	-0.404563	-0.396859	-0.394995	-0.471435	-0.515889
-0.241538	-0.095885	0.0448279	0.106959	0.120152	0.0503702	-0.0545595	-0.13597	-0.18161	-0.199517	-0.223844	-0.217774	-0.165251	-0.0726072	0.0332237	0.153621	0.256876	0.287194	0.285395	0.182179	0.0291095	-0.180295	-0.308438	-0.304995	-0.191632	-0.0702948	-0.00410038	-0.0711873	-0.217293	-0.436936	-0.621483	-0.74681	-0.718963	-0.568117	-0.359396	-0.19066	-0.108609	-0.145363	-0.236561	-0.249411	-0.241909	-0.240094	-0.314538	-0.357831	-0.31396	-0.141008	0.0951886	0.258727	0.268866	0.17333
-0.71726	-0.533756	-0.324211	-0.104249	0.0624322	0.143161	0.0724683	-0.0814908	-0.31294	-0.507407	-0.639471	-0.610127	-0.451173	-0.231232	-0.053426	0.0330348	-0.00569415	-0.101794	-0.115336	-0.10743	-0.105517	-0.183963	-0.229584	-0.183354	-0.00110522	0.247787	0.420117	0.430801	0.330129	0.234709	0.205732	0.253557	0.266711	0.286917	0.331712	0.38016	0.386386	0.352349	0.261993	0.214976	0.278576	0.356408	0.457244	0.504557	0.506902	0.419473	0.321934	0.254851	0.252041	0.310652
0.301483	0.221875	0.176509	0.120754	0.118445	0.107822	0.0694406	0.0340013	-0.0298775	-0.0789747	-0.0221522	0.0927964	0.310901	0.612996	0.907535	1.07185	1.01921	0.777947	0.435392	0.186075	0.113635	0.147029	0.204293	0.247753	0.342598	0.345613	0.282712	0.132582	0.0412516	0.0489939	0.183145	0.406279	0.565949	0.583013	0.400399	0.124201	-0.131878	-0.249608	-0.266076	-0.207162	-0.150501	-0.098148	-0.160825	-0.294236	-0.427607	-0.517871	-0.520957	-0.404906	-0.313588	-0.311778
0.0948709	-0.0403141	-0.194895	-0.27177	-0.2508	-0.112665	0.101195	0.25423	0.270585	0.0955601	-0.16916	-0.414597	-0.527434	-0.543218	-0.486752	-0.432445	-0.382268	-0.442341	-0.570207	-0.698036	-0.784549	-0.787507	-0.676279	-0.588756	-0.58702	-0.765827	-1.1163	-1.48341	-1.69786	-1.70184	-1.50474	-1.34391	-1.30302	-1.34724	-1.47238	-1.54117	-1.57409	-1.56069	-1.52117	-1.48786	-1.45368	-1.34421	-1.23109	-1.10711	-0.962214	-0.846473	-0.855228	-0.979073	-1.14128	-1.20689
0.356439	0.204616	0.0134301	-0.113808	-0.175753	-0.148454	-0.0518692	0.0390581	0.0841314	0.10523	0.167584	0.303621	0.491598	0.646957	0.727388	0.666633	0.500901	0.400042	0.440143	0.543619	0.619492	0.609282	0.509894	0.372756	0.310193	0.330775	0.368108	0.45757	0.636593	0.824455	0.948752	0.881489	0.634323	0.299084	0.0239052	-0.0428344	0.0669037	0.22555	0.428287	0.554501	0.50513	0.383917	0.175079	-0.0237651	-0.213952	-0.226517	-0.0191656	0.311501	0.5916	0.688836
1.10119	0.829379	0.571775	0.449827	0.492801	0.603716	0.684178	0.673351	0.567951	0.422519	0.356172	0.377999	0.41759	0.512463	0.702314	0.901538	1.03335	0.962022	0.699906	0.344391	0.052569	-0.0182071	0.0981681	0.26641	0.481408	0.615256	0.562899	0.434355	0.212886	0.00201554	-0.199674	-0.213	0.00689322	0.357559	0.6546	0.757716	0.679465	0.507996	0.358991	0.245451	0.169143	0.134005	0.103534	0.0683368	0.0547464	0.105173	0.244195	0.385888	0.511642	0.596833
0.618667	0.445271	0.298737	0.254282	0.285383	0.324109	0.413865	0.593477	0.781957	0.906663	0.839179	0.5912	0.254857	-0.0212265	-0.0881856	0.0219134	0.181082	0.384485	0.511115	0.461581	0.339969	0.130445	-0.0690536	-0.259866	-0.272473	-0.0644389	0.267316	0.548336	0.645891	0.571861	0.409639	0.268669	0.161253	0.0890606	0.0558172	0.0269903	-0.00630903	-0.0191665	0.0285403	0.160065	0.294116	0.413088	0.493685	0.530544	0.499321	0.446178	0.348028	0.163798	-0.0504254	-0.198367
-0.154593	0.0821514	0.347279	0.599366	0.747178	0.81104	0.782862	0.670628	0.475368	0.268814	0.122753	0.0811032	0.147863	0.284642	0.413934	0.451015	0.442276	0.42927	0.422687	0.382762	0.320204	0.226128	0.0873	-0.0317281	-0.0672605	-0.0255918	0.0288595	0.0331823	-0.0608833	-0.158176	-0.286059	-0.352336	-0.292925	-0.185537	-0.0636468	0.0218424	-0.0124288	-0.145069	-0.312585	-0.424551	-0.476805	-0.470212	-0.442815	-0.360075	-0.235181	-0.0409081	0.180688	0.326131	0.367105	0.277931
0.453376	0.406174	0.324362	0.233587	0.118604	-0.038309	-0.16911	-0.208157	-0.162367	-0.10253	-0.0977794	-0.201149	-0.308065	-0.448597	-0.521429	-0.456142	-0.338132	-0.204186	-0.110241	-0.147902	-0.293662	-0.477746	-0.600786	-0.658209	-0.650964	-0.620858	-0.529933	-0.392686	-0.179198	0.064316	0.224145	0.269171	0.171177	0.00959731	-0.152497	-0.277677	-0.366815	-0.418547	-0.493314	-0.591286	-0.724846	-0.875193	-1.01114	-1.15213	-1.28981	-1.4067	-1.42626	-1.38192	-1.27705	-1.13536
0.0505226	-0.131824	-0.246669	-0.26502	-0.213345	-0.150245	-0.145524	-0.248262	-0.354525	-0.494199	-0.566587	-0.501698	-0.384408	-0.25128	-0.157909	-0.19534	-0.34021	-0.52317	-0.645459	-0.702531	-0.695331	-0.665408	-0.575038	-0.43863	-0.226445	0.0155822	0.174435	0.219187	0.121791	-0.0388024	-0.199907	-0.324323	-0.412916	-0.464332	-0.538643	-0.636017	-0.768761	-0.918191	-1.0533	-1.19344	-1.33028	-1.44645	-1.4659	-1.42182	-1.31759	-1.17677	-1.02216	-0.872638	-0.792093	-0.679591
-0.0808624	-0.1398	-0.268263	-0.371814	-0.499783	-0.563268	-0.499203	-0.383402	-0.251963	-0.159777	-0.196733	-0.339764	-0.520402	-0.641139	-0.697487	-0.690378	-0.660835	-0.571612	-0.436935	-0.227443	0.0115125	0.168349	0.212533	0.116373	-0.0421819	-0.201242	-0.324078	-0.411548	-0.462311	-0.535679	-0.631817	-0.762877	-0.91041	-1.04381	-1.18217	-1.31727	-1.43197	-1.45116	-1.40765	-1.30474	-1.16571	-1.01306	-0.865435	-0.785912	-0.674838	-0.518509	-0.324883	-0.159192	-0.0101326	0.0666895
1.73633	1.95055	2.13285	2.23912	2.19198	2.00241	1.72318	1.45473	1.25533	1.17109	1.17692	1.2355	1.25962	1.31994	1.42846	1.54949	1.70039	1.82798	1.9151	1.86896	1.69846	1.4721	1.26929	1.16902	1.25147	1.4228	1.6361	1.79263	1.82632	1.76508	1.65659	1.58963	1.57312	1.60444	1.62755	1.59659	1.48139	1.33935	1.22411	1.18202	1.14085	1.05232	0.890271	0.72676	0.566355	0.44636	0.379594	0.396507	0.476456	0.616627
0.862541	0.949071	1.02603	1.13009	1.22415	1.28834	1.24915	1.10435	0.912101	0.739862	0.654704	0.724731	0.870232	1.05138	1.18433	1.21293	1.16093	1.06879	1.01192	0.997895	1.0245	1.04413	1.01783	0.919997	0.799363	0.701488	0.665748	0.630782	0.555595	0.417969	0.279102	0.142873	0.0409634	-0.0157394	-0.00137607	0.0665235	0.185568	0.305016	0.368121	0.355052	0.255865	0.200754	0.12775	0.0603206	0.00699035	-0.00340547	0.0399015	0.104757	0.134224	0.122998
0.399916	0.455852	0.521834	0.57586	0.631539	0.662703	0.63784	0.545339	0.431282	0.338743	0.304951	0.271891	0.200803	0.0706809	-0.0606148	-0.189417	-0.28577	-0.339381	-0.325801	-0.261603	-0.149049	-0.0361139	0.0235514	0.0111943	-0.0825851	-0.134691	-0.203715	-0.267468	-0.317891	-0.32772	-0.286774	-0.225454	-0.197594	-0.208208	-0.249892	-0.29024	-0.251479	-0.189651	-0.178175	-0.224146	-0.33225	-0.435104	-0.519564	-0.579087	-0.574333	-0.521148	-0.45895	-0.399764	-0.403609	-0.432231
0.484244	0.558604	0.595073	0.567957	0.477092	0.362625	0.268451	0.234062	0.200419	0.128075	-0.00434566	-0.137961	-0.269038	-0.367093	-0.421651	-0.407831	-0.342499	-0.227957	-0.113027	-0.0523076	-0.064883	-0.160319	-0.213345	-0.283588	-0.348468	-0.399781	-0.409784	-0.368114	-0.305712	-0.277359	-0.288161	-0.330582	-0.371641	-0.332196	-0.269276	-0.257597	-0.304381	-0.414394	-0.519065	-0.605017	-0.665591	-0.660753	-0.606629	-0.543332	-0.483101	-0.487014	-0.516141	-0.608263	-0.69789	-0.72038
-0.0980351	-0.160908	-0.212409	-0.271269	-0.253092	-0.139502	0.0180052	0.256426	0.505648	0.731437	0.847695	0.843881	0.697328	0.460105	0.190456	-0.0299369	-0.11331	-0.112995	-0.0464569	0.016541	0.109911	0.230966	0.326504	0.368901	0.338554	0.242312	0.178346	0.179017	0.334168	0.520186	0.618573	0.593637	0.438484	0.181284	-0.157849	-0.481695	-0.79478	-1.06146	-1.30271	-1.44667	-1.49486	-1.50683	-1.46517	-1.40017	-1.32719	-1.24586	-1.13903	-1.0316	-0.880852	-0.734272
0.385731	0.456718	0.493555	0.497309	0.444748	0.332615	0.264261	0.264978	0.430774	0.629554	0.734691	0.708044	0.542246	0.2674	-0.0950006	-0.441065	-0.77563	-1.06061	-1.31841	-1.47224	-1.52374	-1.53653	-1.49201	-1.42256	-1.34457	-1.25766	-1.1435	-1.0287	-0.867607	-0.710971	-0.542521	-0.346729	-0.144287	-0.0173401	0.00632989	-0.0999085	-0.246474	-0.363274	-0.524649	-0.680851	-0.869365	-0.997778	-1.03011	-0.946585	-0.856669	-0.79378	-0.745744	-0.672795	-0.605048	-0.587997
-0.00900343	0.176956	0.261629	0.260433	0.157472	0.0238436	-0.0809401	-0.225713	-0.365844	-0.534964	-0.650166	-0.679173	-0.604239	-0.523574	-0.467155	-0.424061	-0.358618	-0.29784	-0.282544	-0.296666	-0.34394	-0.362378	-0.311013	-0.230456	-0.200693	-0.293223	-0.438749	-0.541617	-0.514703	-0.381062	-0.131022	0.205953	0.543183	0.770646	0.869485	0.852181	0.778581	0.684629	0.593097	0.530464	0.482088	0.436341	0.400179	0.432925	0.485135	0.498992	0.365266	0.160234	-0.00649251	-0.104503
-0.128504	-0.0316294	0.16289	0.451352	0.760596	0.977628	1.07871	1.06101	0.985743	0.889664	0.796059	0.732008	0.682537	0.635754	0.598773	0.632261	0.685653	0.699823	0.56307	0.353395	0.182894	0.0826643	0.0717062	0.151695	0.276404	0.389264	0.485728	0.504252	0.39924	0.250729	0.145918	0.184136	0.316696	0.421769	0.421505	0.319792	0.0986565	-0.0154836	0.0152245	0.204015	0.390053	0.529459	0.587688	0.646915	0.739752	0.779854	0.675504	0.414381	0.0952012	-0.160145
0.501706	0.502599	0.490281	0.449866	0.401993	0.335508	0.219612	0.0452471	-0.116742	-0.238421	-0.2885	-0.258489	-0.197238	-0.147104	-0.0446133	0.119056	0.292895	0.428557	0.46039	0.35596	0.174056	0.0314739	0.00934579	0.0498161	0.0890856	0.0689472	0.0800288	0.144418	0.246452	0.371931	0.410386	0.351825	0.282941	0.264621	0.367774	0.550146	0.692485	0.803576	0.852793	0.885232	0.887439	0.837744	0.713737	0.513477	0.235802	-0.0237518	-0.168406	-0.176201	-0.0644121	0.0551408
0.619984	0.548694	0.372241	0.152654	-0.00178758	-0.0219685	0.0245659	0.0697195	0.0465637	0.0593057	0.133343	0.250666	0.394947	0.439164	0.371828	0.292622	0.271557	0.390166	0.599865	0.763533	0.89127	0.94786	0.985161	0.987699	0.930556	0.787969	0.557701	0.23842	-0.0600254	-0.226355	-0.235317	-0.106778	0.0306885	0.0836571	-0.0232175	-0.300097	-0.577179	-0.775812	-0.830254	-0.697746	-0.459214	-0.151518	0.0533901	0.157594	0.225091	0.291968	0.326013	0.393837	0.375682	0.282665
0.835962	0.480015	0.171261	-0.0152631	-0.0464847	-0.00676069	0.0367982	0.0144601	0.0267522	0.0981749	0.211354	0.350539	0.393195	0.328237	0.251829	0.231508	0.345927	0.54822	0.706107	0.829333	0.883925	0.919908	0.922356	0.867232	0.729681	0.507546	0.19954	-0.0883644	-0.248819	-0.257465	-0.133466	-0.000854319	0.0502435	-0.0528564	-0.319957	-0.587253	-0.778871	-0.83139	-0.703562	-0.473454	-0.176625	0.0210455	0.121569	0.186682	0.251197	0.284039	0.349469	0.331954	0.242223	0.15874
0.834845	0.786816	0.704275	0.557885	0.328091	0.0197149	-0.273594	-0.437061	-0.445869	-0.319542	-0.184441	-0.132384	-0.23742	-0.509534	-0.781847	-0.977063	-1.03057	-0.90034	-0.665913	-0.363512	-0.16213	-0.0597197	0.00661531	0.0723415	0.1058	0.172458	0.154614	0.0631988	-0.0218512	-0.0582669	-0.00202942	0.0183985	0.0494786	0.0320504	-0.0485526	-0.186139	-0.373871	-0.619766	-0.849015	-1.02621	-1.07416	-1.04785	-0.928317	-0.796948	-0.665171	-0.561913	-0.513439	-0.543042	-0.605139	-0.608585
0.304889	0.367413	0.411791	0.487575	0.525101	0.572943	0.635615	0.65707	0.629277	0.614636	0.638569	0.707521	0.744344	0.649308	0.489684	0.33108	0.152161	0.0296418	-0.100716	-0.186418	-0.268976	-0.337255	-0.396131	-0.419664	-0.379754	-0.266636	-0.0964816	0.0290762	0.0943763	0.0519506	-0.0448606	-0.132006	-0.186321	-0.114258	0.0677191	0.332675	0.574289	0.703464	0.616634	0.348192	0.0697472	-0.0688677	-0.0268483	0.108396	0.264832	0.373155	0.393598	0.360483	0.226562	0.0934558
0.949826	0.839308	0.720566	0.655283	0.661492	0.720507	0.7582	0.660918	0.497522	0.335171	0.152024	0.0266102	-0.106828	-0.194555	-0.279064	-0.348956	-0.409223	-0.433312	-0.392459	-0.276668	-0.102493	0.0260312	0.0928743	0.0494461	-0.0496526	-0.138857	-0.194456	-0.12069	0.0655872	0.336803	0.584127	0.716354	0.627472	0.352687	0.0676632	-0.074227	-0.0312147	0.107225	0.267358	0.37824	0.399166	0.365269	0.228183	0.091932	0.0469245	0.0790364	0.135666	0.155851	0.0888659	-0.00960413
0.878178	0.821648	0.617376	0.299747	0.0114681	-0.125608	-0.0828311	0.0548521	0.21411	0.324386	0.345198	0.311486	0.175149	0.0396428	-0.00511888	0.0268176	0.083138	0.103213	0.0365934	-0.0613386	-0.118506	-0.118506	-0.0761309	0.0186785	0.150136	0.23784	0.23356	0.134799	0.0226625	-0.0581106	-0.0244961	0.113813	0.326088	0.474692	0.470397	0.35504	0.269193	0.229343	0.194514	0.136537	0.0521641	-0.0541777	-0.164633	-0.253884	-0.316288	-0.356061	-0.305045	-0.134605	0.0638386	0.18819
0.743482	0.504825	0.290408	0.18553	0.146051	0.117066	0.0558016	-0.0333575	-0.145731	-0.262451	-0.356765	-0.422709	-0.464737	-0.410828	-0.230721	-0.0210208	0.110384	0.138091	0.10121	0.113914	0.184703	0.366733	0.60276	0.798116	0.941442	1.01937	0.993122	0.874184	0.719438	0.497448	0.338359	0.380169	0.627175	0.978749	1.28255	1.42124	1.33628	1.0708	0.722998	0.435901	0.282545	0.231198	0.264685	0.32639	0.346944	0.36824	0.349568	0.373588	0.447613	0.577402
0.449725	0.759489	1.0478	1.27349	1.36269	1.2545	0.993187	0.650837	0.368244	0.217293	0.166752	0.199714	0.260451	0.280683	0.301644	0.283265	0.306909	0.379772	0.507525	0.588429	0.685928	0.756988	0.817624	0.856154	0.804559	0.678673	0.54384	0.485405	0.496103	0.523351	0.495054	0.363154	0.138862	-0.100815	-0.261992	-0.266082	-0.152893	-0.0727695	-0.137909	-0.343158	-0.650056	-0.867498	-0.924074	-0.74726	-0.391119	0.00375597	0.240623	0.255983	0.0982538	-0.137476
-0.789332	-0.98834	-1.20645	-1.39366	-1.50841	-1.47194	-1.34714	-1.18656	-1.08393	-1.09174	-1.20454	-1.41923	-1.57971	-1.64901	-1.63522	-1.60264	-1.58616	-1.59819	-1.62609	-1.67573	-1.71596	-1.73868	-1.71247	-1.54921	-1.33757	-1.11096	-0.975346	-0.919155	-0.974415	-1.06164	-1.15091	-1.23025	-1.31474	-1.41651	-1.52073	-1.61961	-1.66202	-1.64968	-1.64326	-1.66435	-1.73591	-1.77671	-1.73918	-1.66827	-1.64304	-1.65717	-1.66503	-1.6001	-1.43898	-1.20089
-1.82132	-1.67357	-1.47555	-1.28088	-1.10283	-0.998662	-1.00613	-1.11392	-1.31908	-1.47243	-1.53865	-1.52547	-1.49434	-1.4786	-1.49009	-1.51675	-1.56419	-1.60263	-1.62434	-1.5993	-1.44328	-1.24105	-1.02449	-0.894903	-0.841207	-0.894013	-0.977369	-1.06267	-1.13848	-1.21923	-1.31648	-1.41607	-1.51056	-1.55109	-1.53929	-1.53316	-1.55331	-1.62169	-1.66068	-1.62482	-1.55706	-1.53295	-1.54645	-1.55396	-1.49191	-1.33795	-1.11043	-0.959077	-0.933154	-0.994496
-0.199398	-0.204454	-0.215339	-0.285089	-0.363229	-0.435195	-0.503699	-0.576654	-0.664521	-0.754506	-0.83988	-0.876501	-0.865845	-0.860298	-0.878507	-0.940291	-0.97552	-0.943118	-0.881896	-0.860112	-0.872309	-0.879095	-0.823034	-0.683921	-0.478353	-0.341597	-0.318175	-0.3736	-0.464724	-0.52606	-0.51931	-0.476633	-0.397773	-0.299259	-0.217161	-0.155138	-0.14844	-0.148221	-0.0615517	0.109835	0.38369	0.662553	0.804843	0.774742	0.597349	0.405358	0.262131	0.175677	0.0957672	-0.0654662
-0.0300248	-0.018882	0.00742191	0.0431318	0.0248721	-0.0715057	-0.201115	-0.306372	-0.358145	-0.364427	-0.302173	-0.167655	0.0390779	0.203944	0.308399	0.24873	0.143319	0.00918361	-0.153903	-0.303274	-0.402315	-0.496556	-0.581628	-0.649587	-0.702076	-0.674357	-0.525654	-0.258691	0.0391694	0.241684	0.216966	0.0525399	-0.186092	-0.387251	-0.483939	-0.525903	-0.534033	-0.533613	-0.606607	-0.718806	-0.882497	-1.13611	-1.38981	-1.50976	-1.43362	-1.08172	-0.579685	-0.120671	0.166344	0.22473
0.264804	0.320729	0.386096	0.451577	0.515446	0.592208	0.684432	0.722667	0.713258	0.659262	0.68176	0.693438	0.688847	0.647755	0.557023	0.46814	0.355905	0.283791	0.208051	0.130683	0.056407	0.0495742	0.110011	0.241405	0.401905	0.529367	0.619883	0.646517	0.659517	0.600664	0.528107	0.471033	0.447967	0.478019	0.514931	0.539263	0.514828	0.528612	0.537682	0.517981	0.402902	0.182015	-0.15192	-0.530013	-0.840659	-1.02669	-1.05879	-0.977662	-0.750401	-0.428566
0.0142464	-0.139235	-0.246898	-0.369976	-0.467235	-0.54894	-0.679641	-0.808581	-0.871398	-0.776866	-0.712024	-0.730831	-0.838768	-0.937096	-0.965671	-0.859138	-0.641116	-0.500193	-0.521384	-0.69402	-0.886386	-0.964279	-0.90871	-0.752226	-0.615274	-0.589243	-0.690085	-0.830978	-0.94425	-0.974801	-0.940732	-0.878787	-0.765659	-0.618137	-0.454504	-0.379002	-0.408184	-0.494545	-0.607259	-0.712697	-0.806318	-0.875401	-0.940085	-0.99163	-1.09856	-1.12819	-1.08124	-0.922766	-0.686166	-0.481522
0.386134	0.252324	0.110028	-0.0162344	-0.134102	-0.229492	-0.312994	-0.374611	-0.432305	-0.478279	-0.573648	-0.600077	-0.558206	-0.416857	-0.205827	-0.0233008	0.05692	0.0441971	-0.0184175	-0.0747904	-0.0691303	-0.00616496	0.111463	0.243796	0.382226	0.515008	0.639422	0.719476	0.721018	0.619153	0.454959	0.231749	0.0275888	-0.0649831	-0.072584	-0.064745	-0.12953	-0.329532	-0.549384	-0.720206	-0.732901	-0.612309	-0.453867	-0.365244	-0.337217	-0.363859	-0.399326	-0.359299	-0.239648	-0.0491635
0.214697	0.293339	0.375999	0.422942	0.378781	0.189282	-0.132842	-0.477663	-0.767014	-0.923987	-0.948512	-0.880372	-0.796079	-0.72118	-0.695973	-0.755529	-0.865857	-0.992547	-1.06685	-1.05179	-0.963826	-0.915864	-0.900077	-0.892059	-0.822374	-0.696335	-0.567899	-0.507301	-0.531825	-0.560929	-0.50884	-0.405335	-0.376584	-0.450073	-0.596297	-0.816405	-1.01952	-1.14651	-1.21422	-1.235	-1.19458	-1.08663	-0.910935	-0.736196	-0.666859	-0.702877	-0.892475	-1.13941	-1.31816	-1.39701
0.883677	0.652898	0.484265	0.397303	0.395048	0.448398	0.486965	0.514415	0.538295	0.558129	0.556305	0.559798	0.579338	0.627706	0.73716	0.837862	0.914709	0.956374	0.946437	0.867539	0.689328	0.411492	0.207912	0.0729688	0.0593109	0.128744	0.211809	0.244823	0.261691	0.268701	0.306313	0.366672	0.38419	0.374731	0.283942	0.142918	-0.0281717	-0.1687	-0.175508	-0.0781703	0.0530545	0.15692	0.243984	0.199573	0.0854608	0.00842884	0.059215	0.230055	0.464991	0.716064
0.654118	0.448969	0.189115	0.0219216	-0.0946081	-0.092917	-0.0191006	0.0692083	0.104307	0.12224	0.129693	0.169679	0.233849	0.252473	0.242416	0.145896	-0.00403205	-0.185923	-0.335323	-0.342561	-0.239078	-0.0995685	0.0108542	0.103415	0.0561999	-0.0651163	-0.147011	-0.093019	0.0886071	0.338375	0.605299	0.74476	0.782756	0.715722	0.578677	0.369194	0.130757	-0.0794679	-0.211861	-0.313376	-0.400529	-0.492958	-0.639126	-0.851097	-1.02941	-1.20639	-1.27177	-1.1668	-0.876892	-0.455881
-0.210277	-0.307361	-0.349793	-0.329421	-0.272698	-0.261637	-0.282432	-0.366091	-0.431028	-0.410599	-0.256324	-0.0347251	0.177417	0.340267	0.402386	0.360858	0.283731	0.267806	0.310966	0.448664	0.608309	0.731398	0.710813	0.576326	0.391258	0.272856	0.24978	0.389839	0.589784	0.772833	0.828308	0.786323	0.687247	0.57242	0.469775	0.377896	0.242233	0.0524806	-0.130625	-0.261339	-0.268315	-0.117007	0.0952222	0.294054	0.377247	0.347481	0.306414	0.315768	0.418206	0.530084
0.508166	0.426596	0.326324	0.277464	0.294242	0.452948	0.656151	0.842185	0.898564	0.855894	0.755204	0.638505	0.534187	0.44081	0.302937	0.110091	-0.0759986	-0.208844	-0.215933	-0.0621587	0.153529	0.355602	0.440151	0.409899	0.368164	0.377669	0.481777	0.595478	0.645728	0.593116	0.434552	0.178362	-0.0479868	-0.190452	-0.264956	-0.25158	-0.222157	-0.172282	-0.0887842	-0.00924389	0.0865135	0.161558	0.128921	0.0348008	-0.085552	-0.227687	-0.328366	-0.427365	-0.503542	-0.450412
0.813303	0.894729	0.956429	0.917579	0.827024	0.698198	0.569862	0.455144	0.352456	0.200835	-0.0112393	-0.215884	-0.361975	-0.369771	-0.200664	0.0365301	0.258751	0.351731	0.318463	0.272566	0.283019	0.397507	0.522546	0.577806	0.519949	0.345573	0.0638389	-0.185079	-0.34175	-0.423683	-0.408973	-0.376617	-0.321768	-0.229945	-0.142473	-0.0371678	0.0453589	0.00946787	-0.0940368	-0.22639	-0.382698	-0.493415	-0.602285	-0.686059	-0.62763	-0.429368	-0.172684	0.0917717	0.303962	0.459643
0.53248	0.540448	0.498074	0.455093	0.417578	0.43976	0.502711	0.587553	0.610712	0.533089	0.360041	0.162386	-0.0422634	-0.263521	-0.414761	-0.512283	-0.487501	-0.355461	-0.174605	0.0419422	0.228114	0.394724	0.433285	0.459027	0.44387	0.45492	0.500859	0.666672	0.847666	1.01726	1.03492	0.935948	0.710703	0.441157	0.209571	0.0861815	0.0531476	0.100366	0.172982	0.178879	0.0976846	-0.0389768	-0.189097	-0.302502	-0.444565	-0.639313	-0.85297	-1.04472	-1.11803	-1.05436
0.594717	0.322162	0.0851676	-0.112698	-0.213783	-0.240895	-0.193914	-0.121662	-0.115796	-0.196582	-0.332557	-0.481923	-0.594758	-0.736108	-0.929878	-1.14246	-1.33325	-1.40619	-1.34284	-1.15579	-0.892742	-0.703288	-0.623292	-0.616938	-0.632302	-0.662153	-0.689642	-0.746129	-0.800696	-0.812299	-0.818209	-0.718817	-0.544426	-0.38917	-0.278873	-0.287743	-0.33836	-0.334099	-0.264353	-0.122779	-0.0250116	-0.0515177	-0.121567	-0.236611	-0.45334	-0.740343	-1.0096	-1.22005	-1.32574	-1.37676
0.164502	0.0382927	-0.127656	-0.288654	-0.449475	-0.56118	-0.703603	-0.898845	-1.11304	-1.30528	-1.37878	-1.31494	-1.12648	-0.861427	-0.670535	-0.589931	-0.583528	-0.599009	-0.629087	-0.656785	-0.713701	-0.768682	-0.780373	-0.786328	-0.686181	-0.510466	-0.354031	-0.242896	-0.251834	-0.302835	-0.298542	-0.228266	-0.0856173	0.0128929	-0.0138145	-0.0843962	-0.200313	-0.418688	-0.70787	-0.979168	-1.19122	-1.29771	-1.34912	-1.32324	-1.24698	-1.12003	-0.930971	-0.717797	-0.56276	-0.497486
0.412316	0.478788	0.541159	0.577896	0.542829	0.484362	0.450272	0.481121	0.569539	0.649984	0.681131	0.635494	0.538318	0.452184	0.464863	0.579665	0.742706	0.87459	0.916131	0.870669	0.749315	0.617007	0.449639	0.396641	0.433345	0.511548	0.571203	0.598112	0.595162	0.573447	0.469494	0.364206	0.2297	0.0477059	-0.119127	-0.276246	-0.419216	-0.430577	-0.341264	-0.145222	0.0489642	0.163058	0.152383	0.0696742	-0.0217232	-0.12731	-0.176137	-0.162098	-0.125969	-0.108348
0.500928	0.537308	0.568078	0.559388	0.495833	0.39601	0.311455	0.323903	0.436598	0.596647	0.726111	0.76689	0.722262	0.603134	0.473255	0.308958	0.256932	0.292963	0.36973	0.428291	0.454706	0.45181	0.430494	0.328448	0.225092	0.0930538	-0.0856005	-0.249373	-0.403608	-0.543955	-0.555108	-0.467433	-0.274988	-0.0843652	0.0276349	0.0171557	-0.0640353	-0.153756	-0.257405	-0.305336	-0.291555	-0.256088	-0.238791	-0.288817	-0.406346	-0.481488	-0.518308	-0.468531	-0.379295	-0.310606
0.581984	0.448247	0.333442	0.178943	0.135653	0.178075	0.260113	0.322693	0.350922	0.347827	0.325048	0.215997	0.105545	-0.0355572	-0.226476	-0.401491	-0.566314	-0.716296	-0.728214	-0.63452	-0.428864	-0.225156	-0.105467	-0.116666	-0.20343	-0.29931	-0.410074	-0.461296	-0.446568	-0.408667	-0.390183	-0.443642	-0.56924	-0.649541	-0.688888	-0.635694	-0.540332	-0.466927	-0.401587	-0.379729	-0.386295	-0.478629	-0.627665	-0.800152	-0.943894	-1.02774	-1.03987	-1.08863	-1.19133	-1.25287
-0.026638	0.0716738	0.198768	0.342607	0.503144	0.639372	0.666199	0.593775	0.434926	0.285723	0.1518	0.0450605	-0.033565	-0.113598	-0.228529	-0.341908	-0.434365	-0.372518	-0.203103	-0.00670012	0.178797	0.277916	0.332927	0.359795	0.388172	0.425939	0.464688	0.425983	0.34137	0.207508	0.156022	0.257406	0.413125	0.580571	0.617658	0.475868	0.237202	0.0218995	-0.0883519	-0.0537081	-0.00663139	0.0180228	-0.07274	-0.281091	-0.518906	-0.661375	-0.675912	-0.666841	-0.666334	-0.701304
-0.0859841	-0.107301	-0.169091	-0.282533	-0.397566	-0.497969	-0.430519	-0.245756	-0.0315604	0.170742	0.278841	0.338834	0.368137	0.399085	0.440273	0.482533	0.440321	0.348043	0.202054	0.145904	0.256472	0.426299	0.608913	0.649361	0.494726	0.234438	-0.000369827	-0.120609	-0.082827	-0.0314855	-0.0045977	-0.103583	-0.33081	-0.590169	-0.745545	-0.761399	-0.751506	-0.750954	-0.789091	-0.799384	-0.721042	-0.453494	-0.0678718	0.282427	0.457512	0.440679	0.260294	-0.0549618	-0.42216	-0.680767
0.0207139	0.144282	0.310852	0.449823	0.550159	0.516795	0.432581	0.292301	0.115281	-0.0753833	-0.238451	-0.292328	-0.195583	-0.0623471	0.0411337	0.0673512	-0.00293228	0.0120992	0.139759	0.29902	0.429803	0.494189	0.414757	0.2967	0.169169	0.13789	0.2163	0.319201	0.429849	0.499343	0.485377	0.395952	0.290664	0.215508	0.209369	0.287099	0.404536	0.437947	0.343429	0.19094	0.102958	0.089706	0.224752	0.394445	0.561631	0.650318	0.660666	0.65406	0.615168	0.511525
0.165766	0.0726358	-0.0226621	-0.0474223	-0.0079433	0.0741777	0.104488	0.0834042	-0.0173544	-0.235519	-0.449014	-0.580326	-0.596028	-0.576414	-0.548868	-0.482338	-0.36973	-0.279424	-0.248865	-0.325922	-0.505138	-0.704172	-0.855272	-0.861617	-0.803206	-0.700929	-0.609884	-0.542163	-0.457389	-0.331373	-0.158009	0.0133737	0.156519	0.263796	0.332661	0.387431	0.373187	0.348267	0.332772	0.335059	0.394748	0.548448	0.736886	0.922094	1.03475	1.02722	0.949387	0.827773	0.743663	0.778315
0.680861	0.504991	0.261251	-0.0680278	-0.389126	-0.596875	-0.637184	-0.597072	-0.513747	-0.423071	-0.400518	-0.375884	-0.321895	-0.209164	-0.168554	-0.211484	-0.307197	-0.326264	-0.286529	-0.153573	-0.0111911	0.054649	0.0886077	0.0892072	0.0720468	0.0130862	-0.0043099	-0.0210773	-0.041649	-0.0997518	-0.158064	-0.165346	-0.108027	-0.0589951	-0.0813505	-0.15105	-0.245181	-0.275174	-0.194421	-0.0840143	-0.0453459	-0.145196	-0.365341	-0.602458	-0.776164	-0.838708	-0.820917	-0.734277	-0.697178	-0.722007
0.25284	0.209008	0.1054	-0.0103881	-0.117442	-0.154703	-0.0766173	0.0301424	0.0675337	-0.0290181	-0.241892	-0.471177	-0.639146	-0.699625	-0.682421	-0.598643	-0.562769	-0.586778	-0.644839	-0.70185	-0.682346	-0.640263	-0.645877	-0.69173	-0.750525	-0.83365	-0.861499	-0.811462	-0.727999	-0.611666	-0.491885	-0.378925	-0.331914	-0.366327	-0.412003	-0.442579	-0.426917	-0.422094	-0.383926	-0.391226	-0.449444	-0.627706	-0.896106	-1.15153	-1.32416	-1.4309	-1.48892	-1.54285	-1.57538	-1.60898
-0.0613113	0.0267243	0.129419	0.235714	0.316653	0.341869	0.406144	0.539732	0.736705	0.916635	1.02855	1.07604	1.10962	1.21581	1.39052	1.5218	1.55763	1.47586	1.373	1.31693	1.30729	1.26379	1.18326	1.10248	1.03415	1.03206	1.0774	1.14089	1.19183	1.18929	1.1358	1.12621	1.17626	1.26882	1.30948	1.25252	1.03528	0.724959	0.413315	0.109234	-0.0664943	-0.179227	-0.232141	-0.254114	-0.288701	-0.328827	-0.36618	-0.423351	-0.489554	-0.468036
0.59987	0.615747	0.617175	0.648778	0.706252	0.763076	0.807695	0.805469	0.758612	0.750217	0.794053	0.875138	0.910749	0.860859	0.670565	0.398736	0.125749	-0.140613	-0.294544	-0.393293	-0.439643	-0.45889	-0.489187	-0.524336	-0.557056	-0.607135	-0.665126	-0.646277	-0.55083	-0.393133	-0.271843	-0.182476	-0.145983	-0.0786202	-0.042457	-0.0428689	-0.102499	-0.196378	-0.291444	-0.384008	-0.477804	-0.593275	-0.630064	-0.558	-0.381831	-0.204165	-0.0729541	0.0387513	0.130692	0.188284
1.01225	0.701451	0.335562	0.0127988	-0.209068	-0.261075	-0.188115	-0.0539355	0.0743631	0.101508	0.00693156	-0.183082	-0.356271	-0.430573	-0.316422	-0.0664624	0.224473	0.448368	0.579359	0.653485	0.688011	0.703602	0.681299	0.684679	0.661213	0.691195	0.798233	0.910622	1.02884	1.04621	0.949709	0.726379	0.443863	0.172855	-0.0066319	-0.142261	-0.277439	-0.397551	-0.505245	-0.47899	-0.381279	-0.29041	-0.232606	-0.200053	-0.211367	-0.229982	-0.252099	-0.228814	-0.142395	-0.0704259
-0.913271	-1.00511	-1.0612	-0.987449	-0.854303	-0.743524	-0.678435	-0.641779	-0.65452	-0.67548	-0.700385	-0.674166	-0.576855	-0.495817	-0.460375	-0.464098	-0.472606	-0.43298	-0.428389	-0.532883	-0.770832	-1.07775	-1.36693	-1.57287	-1.60385	-1.54704	-1.41772	-1.27253	-1.1775	-1.13393	-1.10184	-1.0127	-0.891748	-0.678873	-0.43995	-0.209166	-0.0292492	0.0998633	0.139569	0.060714	-0.109804	-0.357189	-0.642243	-0.846275	-0.912664	-0.851332	-0.792437	-0.790427	-0.858575	-0.984187
-0.179724	-0.329031	-0.442956	-0.519682	-0.518637	-0.441589	-0.36349	-0.329334	-0.332922	-0.341121	-0.302933	-0.298508	-0.399212	-0.628529	-0.924311	-1.203	-1.40148	-1.43133	-1.37658	-1.25195	-1.11203	-1.02045	-0.978455	-0.947528	-0.86162	-0.74506	-0.539906	-0.30965	-0.0872375	0.0861535	0.210583	0.248848	0.172853	0.00852111	-0.229891	-0.504605	-0.701236	-0.765217	-0.70611	-0.649351	-0.647413	-0.71309	-0.834145	-0.910656	-0.952125	-0.919564	-0.832253	-0.691444	-0.521802	-0.342683
0.130675	0.133701	0.223253	0.407348	0.635345	0.868769	1.07995	1.27322	1.41155	1.46672	1.39117	1.21863	1.00464	0.774752	0.615042	0.413562	0.27979	0.161787	0.104032	0.0785685	0.0737519	0.0195307	-0.0564514	-0.159415	-0.207709	-0.121484	-0.0816343	-0.13827	-0.272758	-0.364265	-0.382863	-0.235605	0.0257261	0.339003	0.551157	0.699515	0.759162	0.778682	0.784729	0.764076	0.747451	0.663416	0.519823	0.314391	0.150797	0.12726	0.312593	0.570751	0.761531	0.795981
-0.25857	0.0261781	0.244984	0.407156	0.485871	0.47247	0.364462	0.255975	0.0919182	-0.128182	-0.362092	-0.584739	-0.723502	-0.789006	-0.783252	-0.743456	-0.628223	-0.515011	-0.336543	-0.0781313	0.153144	0.322797	0.370567	0.328007	0.204912	-0.0042861	-0.188944	-0.261365	-0.269066	-0.164608	-0.00166664	0.171924	0.383504	0.561295	0.633496	0.53765	0.345998	0.191609	0.11459	0.120789	0.207296	0.276408	0.304321	0.235361	0.135296	0.139917	0.262675	0.411614	0.502051	0.472329
0.614437	0.378773	0.212969	0.0231735	-0.198565	-0.435108	-0.650915	-0.785414	-0.848905	-0.843328	-0.804756	-0.693063	-0.583329	-0.410344	-0.159872	0.064298	0.228739	0.275041	0.233789	0.114475	-0.0882952	-0.267279	-0.337475	-0.34494	-0.243691	-0.0857562	0.0825007	0.28758	0.45991	0.529892	0.43699	0.251227	0.101581	0.0269291	0.0329373	0.116787	0.183775	0.21083	0.143989	0.0469986	0.051478	0.170464	0.314827	0.402485	0.373677	0.260719	0.166339	0.153632	0.252131	0.407487
-0.353747	-0.381979	-0.345702	-0.298707	-0.173428	-0.014638	0.151215	0.353364	0.523231	0.592213	0.500639	0.31753	0.170023	0.0964372	0.10236	0.185011	0.251042	0.27771	0.211825	0.11622	0.120635	0.237921	0.380222	0.466627	0.438231	0.326887	0.233855	0.22133	0.318421	0.471558	0.530913	0.417604	0.193575	-0.065371	-0.244281	-0.267849	-0.221202	-0.15676	-0.119843	-0.0674372	0.00232928	0.0754487	0.140635	0.135926	0.104569	0.027546	0.00340076	-0.0221221	-0.0521052	-0.0945248
0.256155	0.157472	0.0840516	-0.00473649	-0.032325	-0.0567459	-0.0873149	-0.130563	-0.167211	-0.158014	-0.0930792	-0.0293737	0.0614441	0.137717	0.150099	0.146489	0.112571	0.0723765	0.070737	0.129338	0.216275	0.273625	0.345565	0.501646	0.758708	1.09495	1.40813	1.53928	1.43423	1.14498	0.737758	0.32627	-0.0175795	-0.225041	-0.300165	-0.280004	-0.227203	-0.14685	-0.0650972	0.00549431	0.0979821	0.227077	0.302997	0.272636	0.148476	-0.0723726	-0.263579	-0.41623	-0.52501	-0.599408
0.0434988	0.0280884	0.0667636	0.100488	0.0961912	0.0832383	0.0482397	0.00676358	0.00507177	0.0655407	0.155248	0.214426	0.288659	0.449715	0.714971	1.06193	1.3851	1.52042	1.41202	1.11355	0.693353	0.26875	-0.0860597	-0.300134	-0.377652	-0.356849	-0.302364	-0.219451	-0.135092	-0.0622504	0.0331853	0.166395	0.244734	0.213407	0.085289	-0.142599	-0.3399	-0.497417	-0.609663	-0.686433	-0.716147	-0.68986	-0.554621	-0.354348	-0.192553	-0.15879	-0.216644	-0.347163	-0.471207	-0.574777
-0.739542	-0.249688	0.344189	0.979134	1.57523	1.94884	2.08291	1.94307	1.6336	1.28713	0.963518	0.75864	0.724883	0.869871	1.08862	1.35117	1.56725	1.65836	1.69997	1.71068	1.70324	1.6575	1.48918	1.20229	0.826133	0.499852	0.360713	0.357529	0.449646	0.533528	0.548451	0.522775	0.4867	0.434497	0.462406	0.606104	0.783866	0.954995	0.991557	0.941639	0.845745	0.77178	0.683262	0.523645	0.301365	0.125258	0.092021	0.161613	0.309143	0.366271
2.16154	1.94411	1.66336	1.34828	1.04063	0.762586	0.583665	0.554185	0.680803	0.871835	1.10112	1.28982	1.36939	1.40573	1.41508	1.40858	1.36864	1.22165	0.971107	0.642607	0.357665	0.236155	0.233374	0.31382	0.387075	0.400107	0.377684	0.34618	0.30059	0.324963	0.450455	0.605695	0.755143	0.787072	0.743478	0.659734	0.595141	0.517838	0.378443	0.184326	0.0305313	0.00150542	0.0622801	0.191119	0.241009	0.157424	-0.0290423	-0.23608	-0.306305	-0.180302
0.2584	0.215098	0.174036	0.119724	0.0730716	0.0363354	-0.00233759	0.0183379	0.124791	0.256478	0.383252	0.410337	0.373357	0.302319	0.247525	0.18195	0.063704	-0.100962	-0.231424	-0.256046	-0.204492	-0.0952005	-0.0528796	-0.123783	-0.281959	-0.457586	-0.517157	-0.410271	-0.176325	0.0450486	0.158468	0.134128	0.0632324	0.0513328	0.0950208	0.165499	0.197704	0.194595	0.106127	0.0446416	-0.0252949	-0.0342621	-0.0281633	-0.0285758	-0.0203979	-0.0128375	-0.0309575	-0.0841542	-0.143693	-0.213533
0.0365946	-0.00376381	-0.0337158	-0.0672054	-0.0440118	0.0660798	0.201455	0.331781	0.359624	0.321609	0.24858	0.192252	0.12484	0.00328211	-0.165997	-0.300113	-0.325425	-0.272426	-0.160073	-0.116567	-0.189457	-0.352063	-0.53261	-0.593849	-0.483969	-0.24347	-0.0158959	0.100701	0.0756786	0.00279725	-0.00943562	0.035476	0.107929	0.141035	0.13784	0.0468928	-0.0163143	-0.0882097	-0.0974281	-0.0911584	-0.0915825	-0.0831755	-0.0754033	-0.0940309	-0.148718	-0.209924	-0.281721	-0.370762	-0.439638	-0.41778
-0.054263	-0.110299	-0.15449	-0.117086	-0.0957652	-0.0899681	-0.171488	-0.309169	-0.514264	-0.672741	-0.759289	-0.859411	-0.965349	-1.07692	-1.17286	-1.27123	-1.33222	-1.29687	-1.15612	-1.01406	-0.837694	-0.672351	-0.614509	-0.693718	-0.911469	-1.23862	-1.58477	-1.8461	-1.88204	-1.69571	-1.42884	-1.1163	-0.863713	-0.686547	-0.667252	-0.813492	-0.95423	-0.96052	-0.795149	-0.491488	-0.24054	-0.141628	-0.274935	-0.553382	-0.835541	-1.01679	-1.08167	-1.0885	-1.13575	-1.2157
0.211177	-0.0262358	-0.245641	-0.483516	-0.643401	-0.733909	-0.831418	-0.93459	-1.04325	-1.13669	-1.23249	-1.29189	-1.25746	-1.12038	-0.982027	-0.810267	-0.649239	-0.592907	-0.670049	-0.882116	-1.20073	-1.53784	-1.79235	-1.82736	-1.64589	-1.38599	-1.0816	-0.835607	-0.663065	-0.644274	-0.786697	-0.923761	-0.929887	-0.768833	-0.473097	-0.228699	-0.132369	-0.262196	-0.533376	-0.808171	-0.984688	-1.04787	-1.05453	-1.10055	-1.1784	-1.28229	-1.31945	-1.30047	-1.27434	-1.23418
-0.513836	-0.38873	-0.27954	-0.183782	-0.190257	-0.323133	-0.447298	-0.452847	-0.30695	-0.0390484	0.182348	0.269612	0.152003	-0.0936537	-0.342586	-0.50249	-0.559728	-0.565759	-0.607444	-0.677974	-0.772082	-0.805743	-0.788548	-0.76488	-0.728499	-0.705587	-0.657822	-0.583495	-0.515033	-0.448394	-0.412626	-0.416759	-0.44272	-0.365145	-0.196712	0.0593404	0.265811	0.384487	0.403066	0.315355	0.150365	-0.046288	-0.225797	-0.366293	-0.433709	-0.396285	-0.298332	-0.118663	0.0969653	0.316551
1.17759	1.04414	0.903624	0.812339	0.779183	0.83363	0.92895	1.03569	1.10362	1.13503	1.09748	0.945798	0.767074	0.554176	0.38931	0.278383	0.24861	0.230471	0.217803	0.190612	0.147391	0.022128	-0.131094	-0.261767	-0.338849	-0.323103	-0.277691	-0.264265	-0.24025	-0.143719	0.040013	0.225423	0.299361	0.191843	-0.0412239	-0.368424	-0.682528	-0.888401	-0.958216	-0.889298	-0.750308	-0.680888	-0.73026	-0.861817	-1.01545	-1.06377	-0.902549	-0.572751	-0.137742	0.210668
0.798747	0.872783	0.951347	0.995853	1.01488	0.977547	0.827387	0.650461	0.439704	0.276497	0.166685	0.137211	0.119255	0.106715	0.0797967	0.0370107	-0.0869921	-0.238673	-0.368032	-0.444337	-0.42875	-0.383795	-0.370505	-0.346731	-0.251171	-0.0692869	0.114258	0.187452	0.0810153	-0.149707	-0.473616	-0.78456	-0.988362	-1.05747	-0.98925	-0.851658	-0.782936	-0.831812	-0.962045	-1.11413	-1.16197	-1.00237	-0.675888	-0.245254	0.0996516	0.270173	0.240347	0.035355	-0.210579	-0.373765
0.0967849	-0.0173349	-0.232265	-0.502713	-0.83128	-1.13928	-1.34629	-1.41649	-1.34719	-1.20743	-1.13763	-1.18728	-1.31956	-1.47403	-1.52262	-1.36051	-1.0289	-0.591503	-0.241178	-0.0679772	-0.0982717	-0.306485	-0.556284	-0.722033	-0.732936	-0.620711	-0.458489	-0.340306	-0.27712	-0.263309	-0.254606	-0.177254	-0.0655907	0.00369517	0.0410132	0.0488968	0.0582651	0.00712169	-0.0674201	-0.155806	-0.246593	-0.312383	-0.291614	-0.206399	-0.135539	-0.0989243	-0.148544	-0.252352	-0.417337	-0.575764
-0.697084	-0.807591	-0.96815	-1.1471	-1.30669	-1.35678	-1.20332	-0.889392	-0.475318	-0.143675	0.0202889	-0.00839003	-0.2055	-0.441977	-0.598887	-0.609209	-0.502968	-0.349398	-0.237517	-0.1777	-0.164626	-0.156387	-0.0831601	0.0225481	0.0881391	0.123467	0.13093	0.139799	0.0913829	0.0208163	-0.0628562	-0.148801	-0.211083	-0.191421	-0.110751	-0.0436704	-0.00900787	-0.0559816	-0.154253	-0.31044	-0.460419	-0.571626	-0.608301	-0.550588	-0.421235	-0.276221	-0.164852	-0.136183	-0.192926	-0.321355
0.500188	0.530439	0.523546	0.501579	0.42182	0.297977	0.126254	-0.0386444	-0.160914	-0.201237	-0.137784	0.00443692	0.163876	0.286324	0.317845	0.255458	0.114252	-0.0628413	-0.199411	-0.284904	-0.268938	-0.164279	-0.0852171	-0.0789151	-0.180104	-0.206539	-0.172309	-0.0438587	0.12215	0.271343	0.429258	0.625841	0.847725	1.05003	1.13223	1.00344	0.735584	0.463357	0.274118	0.263981	0.383167	0.546785	0.673874	0.669621	0.474459	0.157324	-0.155479	-0.393961	-0.509947	-0.50639
0.87625	1.04518	1.17658	1.1876	1.01762	0.706516	0.408375	0.201122	0.19002	0.320552	0.499745	0.638931	0.634273	0.420534	0.0732106	-0.269368	-0.530552	-0.657579	-0.653683	-0.488673	-0.271236	-0.046942	0.111448	0.246638	0.381744	0.423215	0.476872	0.535161	0.610358	0.636264	0.609607	0.50732	0.310847	0.105521	-0.0656972	-0.184579	-0.308144	-0.398534	-0.468805	-0.54194	-0.67788	-0.862669	-1.03499	-1.08782	-0.925141	-0.591043	-0.249425	-0.0335806	0.0274823	-0.0115704
-0.0816118	-0.0452149	-0.0109655	0.1167	0.277471	0.454632	0.614823	0.6699	0.671525	0.634881	0.674475	0.813675	1.02259	1.19001	1.20041	1.04074	0.772909	0.512727	0.265699	0.0395998	-0.21371	-0.457326	-0.642298	-0.658872	-0.538033	-0.354214	-0.13472	0.000756939	0.0983932	0.115841	0.104861	0.0297737	-0.0875818	-0.215971	-0.35342	-0.4167	-0.42252	-0.388299	-0.37264	-0.323468	-0.289658	-0.242142	-0.233407	-0.29222	-0.44221	-0.585725	-0.615378	-0.534904	-0.32783	-0.141769
0.923583	0.851274	0.738379	0.648192	0.580559	0.601092	0.736077	0.938664	1.10102	1.1111	0.956265	0.696546	0.444242	0.204693	-0.01456	-0.2602	-0.49644	-0.675812	-0.691883	-0.574703	-0.39645	-0.183602	-0.0522268	0.0424532	0.0593725	0.0487256	-0.0240886	-0.137891	-0.262393	-0.39568	-0.457044	-0.462688	-0.429503	-0.414318	-0.366635	-0.333849	-0.287771	-0.279301	-0.336333	-0.481781	-0.620952	-0.649706	-0.571669	-0.370865	-0.190437	-0.0621976	-0.0212737	-0.0230515	-0.0550218	-0.111973
-1.02472	-0.998157	-0.866659	-0.682116	-0.479904	-0.262937	-0.131018	-0.0359452	-0.0189558	-0.0296469	-0.102763	-0.217037	-0.342055	-0.475895	-0.537513	-0.54318	-0.509857	-0.49461	-0.446729	-0.413807	-0.367538	-0.359033	-0.416302	-0.562353	-0.7021	-0.730974	-0.652613	-0.450977	-0.269801	-0.14103	-0.0999363	-0.101721	-0.133824	-0.191011	-0.271169	-0.304736	-0.290568	-0.254387	-0.155031	-0.0621163	0.0137865	-0.0137768	-0.041487	0.00609927	0.0988868	0.159061	0.124854	0.0143304	-0.181669	-0.388181
-0.693589	-0.666537	-0.621877	-0.577914	-0.556985	-0.511369	-0.477553	-0.430028	-0.421292	-0.480116	-0.630132	-0.773673	-0.803331	-0.722842	-0.515732	-0.329637	-0.19737	-0.15516	-0.156994	-0.189969	-0.248708	-0.331042	-0.365521	-0.350968	-0.313805	-0.211751	-0.116314	-0.03835	-0.0666616	-0.0951242	-0.0462459	0.0490609	0.110869	0.0757327	-0.0377913	-0.239112	-0.451231	-0.546681	-0.530021	-0.441095	-0.32854	-0.288893	-0.311258	-0.294487	-0.131663	0.0942497	0.338162	0.402868	0.308141	0.140122
0.442865	0.626062	0.784525	0.930288	1.00638	0.971693	0.845947	0.698258	0.55671	0.474959	0.507278	0.623165	0.769601	0.942052	1.11464	1.28874	1.38711	1.39221	1.30897	1.19164	0.979058	0.796441	0.658264	0.602811	0.651043	0.805164	0.964406	1.07608	0.992786	0.747024	0.505549	0.387172	0.459821	0.662246	0.868233	0.996492	0.996426	0.9155	0.776041	0.568209	0.286598	0.0624721	0.0219533	0.175867	0.394036	0.473267	0.33261	0.0118072	-0.271921	-0.377169
1.4298	1.4049	1.35303	1.27759	1.15787	1.02876	0.819555	0.639843	0.503865	0.449294	0.496758	0.648428	0.805137	0.915033	0.833065	0.591213	0.353579	0.237086	0.308578	0.507783	0.710493	0.836712	0.836647	0.757008	0.619768	0.415242	0.138111	-0.0824488	-0.122323	0.0291425	0.24384	0.32181	0.183391	-0.132308	-0.411522	-0.515096	-0.410476	-0.208692	0.0188229	0.159052	0.179733	0.121733	0.0710114	0.0592851	0.0782374	0.152402	0.236602	0.365229	0.463459	0.534624
-0.12041	-0.365554	-0.568963	-0.666343	-0.708484	-0.709347	-0.732456	-0.768338	-0.770735	-0.721123	-0.615066	-0.465877	-0.387113	-0.346331	-0.297318	-0.150419	0.0248011	0.233553	0.457601	0.657036	0.827088	0.832366	0.646	0.325145	-0.0231352	-0.260513	-0.359406	-0.292725	-0.132353	0.0364802	0.174028	0.261543	0.275549	0.215893	0.069158	-0.170786	-0.503857	-0.781288	-0.980773	-1.05438	-0.988953	-0.934646	-0.99096	-1.12306	-1.21406	-1.20941	-1.12122	-1.01496	-0.907454	-0.742816
0.499159	0.604347	0.770683	0.939929	1.10322	1.10742	0.903386	0.552122	0.170832	-0.0890441	-0.19731	-0.124309	0.0512623	0.236097	0.386681	0.482491	0.497825	0.432515	0.271873	0.00918653	-0.355452	-0.659178	-0.877569	-0.958155	-0.886524	-0.82707	-0.888722	-1.03334	-1.13296	-1.12788	-1.03133	-0.914992	-0.797301	-0.617059	-0.421515	-0.280271	-0.270935	-0.345692	-0.476529	-0.580064	-0.598755	-0.533514	-0.488562	-0.433778	-0.347171	-0.273333	-0.27141	-0.316271	-0.414995	-0.621821
0.134905	0.251965	0.39399	0.558054	0.707129	0.861825	0.917111	0.841161	0.618177	0.347247	0.112614	0.0246819	0.10002	0.252199	0.495765	0.654745	0.746352	0.767677	0.714042	0.588643	0.439971	0.392187	0.42223	0.515388	0.529338	0.472941	0.326842	0.202104	0.235275	0.410094	0.645186	0.809051	0.939575	0.960397	0.925772	0.7908	0.681639	0.692651	0.805077	0.979526	1.16824	1.2682	1.17693	0.909561	0.568883	0.28257	0.121435	0.0808488	0.142841	0.244177
0.780396	0.725509	0.676211	0.588519	0.449692	0.291429	0.240668	0.272584	0.371546	0.386366	0.326455	0.171251	0.0387398	0.0739779	0.259692	0.509434	0.68351	0.822168	0.844289	0.807506	0.664122	0.548158	0.559857	0.679289	0.864609	1.06508	1.17127	1.07432	0.790285	0.428375	0.124219	-0.0469571	-0.0900723	-0.0242168	0.0834347	0.166679	0.113937	-0.107966	-0.464447	-0.819433	-0.998163	-0.900215	-0.666053	-0.341113	-0.0695354	0.131175	0.136517	0.0601408	-0.0347624	-0.0122278
-1.32175	-1.31816	-1.23541	-1.021	-0.773079	-0.485202	-0.256567	-0.0875932	-0.0830965	-0.147396	-0.227292	-0.208321	-0.0686833	0.119577	0.292797	0.345506	0.315555	0.244849	0.262259	0.393097	0.60056	0.815566	0.976963	0.991622	0.910417	0.759414	0.602288	0.494679	0.401409	0.370988	0.379229	0.409086	0.394079	0.399054	0.406258	0.465256	0.557003	0.659116	0.701951	0.645666	0.58178	0.534239	0.492898	0.502392	0.53633	0.603977	0.744989	0.963362	1.18548	1.29447
0.124627	0.0542191	0.0721335	0.0737969	0.0214498	-0.0659573	-0.252929	-0.447551	-0.555319	-0.620415	-0.579772	-0.43122	-0.166759	0.128112	0.288767	0.201124	-0.0383116	-0.257165	-0.39444	-0.379961	-0.325317	-0.277865	-0.247539	-0.168684	-0.0123728	0.132274	0.247749	0.238582	0.181073	0.0217526	-0.161218	-0.333983	-0.511231	-0.548872	-0.516645	-0.431033	-0.350664	-0.357527	-0.418603	-0.471537	-0.514425	-0.52264	-0.551659	-0.662375	-0.706815	-0.616827	-0.459715	-0.328042	-0.348733	-0.456635
-0.83786	-0.524341	-0.163328	0.150556	0.312259	0.244732	0.0267416	-0.17251	-0.297491	-0.284309	-0.234558	-0.191357	-0.163746	-0.0919544	0.0503572	0.182049	0.287181	0.278836	0.226477	0.0814262	-0.0851565	-0.242448	-0.403822	-0.438091	-0.40875	-0.330806	-0.257636	-0.263884	-0.31949	-0.367682	-0.40673	-0.414209	-0.440628	-0.541429	-0.581889	-0.49996	-0.35692	-0.23704	-0.255877	-0.354116	-0.45972	-0.478359	-0.429116	-0.34069	-0.267339	-0.248372	-0.202002	-0.0767558	0.120296	0.250682
0.0978374	-0.0515591	-0.167887	-0.190624	-0.174512	-0.140977	-0.136247	-0.184915	-0.241749	-0.278665	-0.260339	-0.147004	-0.00199763	0.0879988	0.153282	0.207777	0.326692	0.499305	0.648611	0.717947	0.712681	0.66545	0.568634	0.47069	0.365659	0.281122	0.147084	-0.0117707	-0.153096	-0.27702	-0.380436	-0.478819	-0.542533	-0.577105	-0.537056	-0.579606	-0.65963	-0.748213	-0.781909	-0.722498	-0.608927	-0.482639	-0.359296	-0.272319	-0.196413	-0.152685	-0.145589	-0.147734	-0.149456	-0.119954
-0.182408	-0.179248	-0.224095	-0.267597	-0.294037	-0.268317	-0.154417	-0.00868651	0.0817591	0.147368	0.202135	0.321644	0.495118	0.64517	0.714851	0.709559	0.662093	0.564794	0.46636	0.360806	0.275847	0.14114	-0.0185083	-0.160539	-0.285081	-0.389014	-0.487887	-0.55192	-0.586664	-0.546415	-0.589178	-0.669602	-0.758626	-0.792491	-0.732784	-0.618645	-0.491727	-0.367768	-0.280357	-0.204073	-0.160126	-0.152994	-0.155151	-0.156881	-0.127231	-0.0716903	-0.0590583	-0.119552	-0.226732	-0.288806
0.296574	0.451226	0.616011	0.748068	0.800396	0.781886	0.730964	0.626582	0.520982	0.407743	0.316599	0.172085	0.000815004	-0.151556	-0.285165	-0.396663	-0.502735	-0.571429	-0.608703	-0.565524	-0.6114	-0.697678	-0.793184	-0.829514	-0.76546	-0.643012	-0.506854	-0.373871	-0.280096	-0.198259	-0.151112	-0.143462	-0.145775	-0.147632	-0.115823	-0.0562387	-0.0426871	-0.107585	-0.222567	-0.28916	-0.227648	-0.0578191	0.15693	0.339721	0.399944	0.444065	0.462242	0.489753	0.529867	0.515338
1.12457	1.00424	0.890108	0.796083	0.675022	0.562915	0.444273	0.34878	0.197371	0.0179292	-0.141711	-0.281695	-0.398514	-0.509647	-0.581618	-0.62067	-0.575431	-0.623495	-0.713891	-0.813953	-0.852017	-0.784906	-0.656616	-0.513962	-0.374634	-0.276385	-0.190643	-0.141247	-0.133231	-0.135655	-0.1376	-0.104274	-0.0418466	-0.0276484	-0.0956428	-0.216111	-0.285881	-0.221435	-0.0435024	0.181493	0.373005	0.436102	0.482328	0.501372	0.530196	0.572223	0.557001	0.452884	0.245381	-0.0360677
0.385312	0.136893	-0.078777	-0.243399	-0.382127	-0.493511	-0.601345	-0.671179	-0.709072	-0.665176	-0.711814	-0.799526	-0.896618	-0.933552	-0.868434	-0.743952	-0.605532	-0.47034	-0.375007	-0.29181	-0.24388	-0.236103	-0.238454	-0.240342	-0.208005	-0.147431	-0.133654	-0.19963	-0.316522	-0.384221	-0.321688	-0.149037	0.0692791	0.255106	0.31633	0.361184	0.379663	0.407631	0.448411	0.433641	0.332614	0.13127	-0.141823	-0.387619	-0.564059	-0.674798	-0.67933	-0.618177	-0.515503	-0.364588
0.655635	0.641296	0.570466	0.559621	0.557148	0.582676	0.624562	0.609391	0.505623	0.298815	0.0183108	-0.234154	-0.415383	-0.529127	-0.533782	-0.470969	-0.365509	-0.210499	-0.145087	-0.163252	-0.272451	-0.372978	-0.467952	-0.493773	-0.444136	-0.293681	-0.0990667	-0.00163231	-0.0387079	-0.126094	-0.212367	-0.270434	-0.318456	-0.375275	-0.44987	-0.472196	-0.412286	-0.23239	-0.022012	0.129254	0.150122	0.0160559	-0.200809	-0.434831	-0.596152	-0.719578	-0.751201	-0.766084	-0.664893	-0.55405
0.728024	0.721086	0.730698	0.688094	0.562772	0.336216	0.0349365	-0.236227	-0.430878	-0.553046	-0.558045	-0.49058	-0.37731	-0.210819	-0.140563	-0.160074	-0.27736	-0.385332	-0.487339	-0.515073	-0.46176	-0.300162	-0.0911342	0.0135163	-0.0263051	-0.120163	-0.212826	-0.275194	-0.326772	-0.387799	-0.467919	-0.491898	-0.427551	-0.234332	-0.00837269	0.154096	0.17651	0.0325146	-0.200412	-0.451766	-0.625035	-0.757602	-0.791567	-0.807553	-0.698867	-0.579815	-0.381708	-0.225737	-0.182049	-0.273263
1.1722	1.07226	0.990911	0.967248	0.919573	0.902081	0.891712	0.915883	0.999768	1.14557	1.34562	1.47625	1.5353	1.47803	1.31599	1.06128	0.789145	0.548394	0.373864	0.306038	0.335352	0.368673	0.328053	0.248389	0.155388	0.0636856	-0.0209948	-0.0927836	-0.162328	-0.196118	-0.204746	-0.198163	-0.185316	-0.200089	-0.206442	-0.184236	-0.215056	-0.271101	-0.372577	-0.488807	-0.546214	-0.575262	-0.491224	-0.356874	-0.210725	-0.0289454	0.134786	0.286162	0.433779	0.560914
0.260644	0.135809	-0.0144034	-0.150086	-0.264551	-0.360225	-0.441702	-0.510776	-0.577689	-0.610202	-0.618503	-0.612169	-0.599808	-0.614023	-0.620135	-0.598769	-0.628423	-0.682348	-0.779986	-0.891819	-0.947055	-0.975004	-0.894145	-0.764876	-0.624256	-0.449352	-0.291814	-0.146164	-0.00413134	0.118195	0.192937	0.215257	0.191898	0.094222	-0.0543147	-0.18333	-0.217766	-0.184848	-0.176531	-0.173263	-0.245255	-0.283729	-0.300174	-0.291337	-0.316761	-0.388872	-0.446513	-0.461836	-0.444299	-0.410982
0.0617775	-0.115439	-0.267241	-0.32893	-0.411086	-0.451508	-0.443487	-0.284962	-0.0321377	0.257334	0.488566	0.539809	0.403943	0.164701	0.0421807	0.0743985	0.228085	0.35809	0.365276	0.203813	-0.0547732	-0.381613	-0.719001	-0.945093	-0.969236	-0.842089	-0.663595	-0.509416	-0.395468	-0.36277	-0.334998	-0.277686	-0.221531	-0.238626	-0.322365	-0.487906	-0.667269	-0.813921	-0.889729	-0.849993	-0.710551	-0.569382	-0.482032	-0.537761	-0.727536	-0.960279	-1.15957	-1.22655	-1.19322	-1.10068
0.805025	0.447176	0.156899	0.0342148	0.0726819	0.21746	0.33828	0.344959	0.194903	-0.0454129	-0.34916	-0.662711	-0.872829	-0.895265	-0.777102	-0.61122	-0.467934	-0.362036	-0.331649	-0.305838	-0.252576	-0.200389	-0.216276	-0.294098	-0.447943	-0.614633	-0.750924	-0.821377	-0.784447	-0.654858	-0.523663	-0.442484	-0.494276	-0.670642	-0.886941	-1.07215	-1.1344	-1.10343	-1.01742	-1.00284	-1.06276	-1.14991	-1.19489	-1.17211	-1.09766	-1.0296	-1.01501	-1.04964	-1.08772	-0.966143
0.516856	0.403346	0.213629	-0.0198167	-0.307113	-0.607337	-0.817959	-0.840449	-0.722003	-0.555723	-0.412094	-0.305943	-0.275482	-0.24961	-0.19622	-0.143908	-0.159833	-0.237842	-0.392055	-0.559145	-0.695762	-0.766383	-0.729366	-0.599466	-0.467956	-0.386583	-0.438499	-0.615288	-0.832105	-1.01776	-1.08016	-1.04911	-0.962895	-0.94828	-1.00835	-1.0957	-1.14079	-1.11796	-1.04333	-0.975106	-0.960479	-0.995197	-1.03336	-0.911496	-0.660769	-0.355202	-0.144605	-0.1268	-0.21484	-0.334968
-0.355978	-0.13435	0.181462	0.517728	0.777118	0.857825	0.759705	0.546447	0.290078	0.122632	0.144878	0.315124	0.540537	0.719007	0.846397	0.895737	0.880898	0.786931	0.682202	0.637518	0.605934	0.63361	0.679093	0.71624	0.690011	0.617782	0.549981	0.441271	0.320955	0.192986	0.111017	0.110885	0.233672	0.389837	0.562214	0.655237	0.700426	0.69208	0.66065	0.667552	0.652154	0.652546	0.594945	0.487057	0.273904	0.070294	-0.0972304	-0.103081	0.0391224	0.245267
0.740548	0.673322	0.568744	0.470966	0.433438	0.408007	0.434832	0.478916	0.514921	0.489498	0.419491	0.353776	0.248408	0.131793	0.0077599	-0.0716877	-0.0718161	0.0471945	0.198557	0.365632	0.455794	0.499593	0.491504	0.46104	0.467731	0.452805	0.453185	0.397356	0.292786	0.0861889	-0.111159	-0.273531	-0.279201	-0.141371	0.0584325	0.197353	0.220175	0.131282	0.0444198	0.0938576	0.317652	0.60449	0.852256	0.976479	0.958995	0.879725	0.786992	0.668454	0.568601	0.438384
0.180428	0.165865	0.0710007	-0.0416777	-0.163896	-0.251699	-0.251835	-0.125749	0.0346135	0.211623	0.307146	0.353548	0.344979	0.312704	0.319792	0.303979	0.304382	0.245233	0.134446	-0.0844356	-0.293517	-0.465543	-0.471551	-0.325526	-0.113842	0.0333381	0.0575175	-0.0366617	-0.128688	-0.0763109	0.160789	0.464683	0.727181	0.858789	0.840265	0.756283	0.658035	0.532449	0.426659	0.2887	0.153267	-0.0243489	-0.267531	-0.523688	-0.734522	-0.889464	-1.04762	-1.17357	-1.28099	-1.26263
0.327002	0.342048	0.384869	0.388795	0.394913	0.365999	0.33331	0.340489	0.324474	0.324881	0.264974	0.152765	-0.068924	-0.280687	-0.454921	-0.461006	-0.313107	-0.0987079	0.0503606	0.0748502	-0.0205372	-0.113744	-0.0606951	0.179447	0.487239	0.753104	0.886401	0.86764	0.78258	0.683072	0.555875	0.448727	0.308998	0.171828	-0.00806646	-0.254368	-0.513811	-0.72735	-0.88428	-1.04447	-1.17203	-1.28082	-1.26223	-1.05532	-0.687939	-0.264518	0.0112523	0.103343	0.130214	0.196126
0.535628	0.344139	0.193616	0.0868646	0.0273396	0.0755162	0.219892	0.462295	0.75425	0.900567	0.849841	0.57117	0.209397	-0.132794	-0.350875	-0.40792	-0.331765	-0.185477	0.0199669	0.309825	0.645112	0.86064	0.933637	0.854083	0.651242	0.380169	0.128857	-0.0059011	0.0415838	0.211397	0.400391	0.585778	0.702728	0.740237	0.639585	0.443741	0.175834	-0.0152282	-0.0987346	-0.0324892	0.167372	0.403433	0.639803	0.77343	0.831464	0.772183	0.698433	0.599621	0.523877	0.42875
-0.561826	-0.598676	-0.651727	-0.726062	-0.839133	-0.915485	-0.847712	-0.701161	-0.539452	-0.388344	-0.323603	-0.362432	-0.474038	-0.563874	-0.585256	-0.541724	-0.495399	-0.471822	-0.472303	-0.43163	-0.366352	-0.248593	-0.0537808	0.185055	0.361381	0.385622	0.261437	0.0486257	-0.185418	-0.354824	-0.454122	-0.520746	-0.535823	-0.542598	-0.508065	-0.479031	-0.4571	-0.487028	-0.456156	-0.345293	-0.149798	-0.0159251	0.000692634	-0.0781417	-0.228271	-0.291504	-0.21402	-0.0619826	0.0699448	0.102372
-1.18763	-1.05987	-0.842359	-0.632152	-0.442807	-0.285723	-0.220923	-0.259788	-0.371497	-0.461415	-0.482817	-0.439245	-0.392878	-0.369279	-0.36976	-0.32905	-0.263712	-0.145845	0.0491464	0.288202	0.464689	0.488953	0.364654	0.151647	-0.0826119	-0.252173	-0.351562	-0.418247	-0.433338	-0.44012	-0.405555	-0.376494	-0.354543	-0.384498	-0.353598	-0.242633	-0.0469587	0.0870369	0.10367	0.0247632	-0.125504	-0.188795	-0.11124	0.0409371	0.172986	0.205442	0.110825	-0.0516598	-0.187141	-0.267449
0.0349017	0.122609	0.128887	0.0799517	-0.0581834	-0.179368	-0.260767	-0.232496	-0.11913	0.0235365	0.16886	0.250835	0.193928	0.0113661	-0.230158	-0.45675	-0.604567	-0.63656	-0.572412	-0.403627	-0.155158	0.162219	0.458297	0.643167	0.721657	0.746594	0.74976	0.743388	0.73765	0.723197	0.748153	0.773097	0.863684	0.970492	1.10329	1.20334	1.23153	1.24712	1.2928	1.32798	1.37926	1.45223	1.47478	1.4103	1.29904	1.18843	1.07654	1.02439	1.00461	1.07853
0.867331	0.783862	0.62298	0.40888	0.170196	-0.055321	-0.173235	-0.186149	-0.166085	-0.204014	-0.230163	-0.218312	-0.163432	-0.130284	-0.153512	-0.194482	-0.252667	-0.334463	-0.433966	-0.524741	-0.691335	-0.857009	-0.969289	-0.985189	-0.882427	-0.704591	-0.439675	-0.199825	-0.0742705	-0.037343	-0.125833	-0.159208	-0.135649	-0.0525426	0.0403345	0.128899	0.210176	0.279223	0.313265	0.234343	0.0850063	-0.136829	-0.329687	-0.476437	-0.482481	-0.394813	-0.292602	-0.227316	-0.215506	-0.186273
-0.942982	-0.867313	-0.831844	-0.854271	-0.846386	-0.718316	-0.519047	-0.289089	-0.0744014	0.135061	0.34483	0.524741	0.618145	0.664132	0.611662	0.514615	0.441803	0.41339	0.422936	0.35997	0.266718	0.0898437	-0.0671881	-0.193214	-0.213054	-0.161371	-0.0615278	0.0511961	0.117801	0.158213	0.0904384	-0.042384	-0.234735	-0.418646	-0.577992	-0.670067	-0.618183	-0.418297	-0.186814	0.00324828	0.108392	0.0993063	-0.0173971	-0.172266	-0.363972	-0.492847	-0.523305	-0.458341	-0.344038	-0.196767
0.265312	0.283995	0.273336	0.263648	0.180778	0.0378844	-0.154565	-0.33857	-0.497997	-0.59012	-0.538209	-0.338221	-0.10662	0.08354	0.188737	0.179647	0.0628841	-0.0920643	-0.283868	-0.412809	-0.443282	-0.378285	-0.263924	-0.116578	0.0493495	0.305988	0.617889	0.884482	1.07679	1.13356	1.04107	0.862935	0.581956	0.250262	0.000829466	-0.0639505	-0.0032583	0.108332	0.140512	0.0856902	-0.0785897	-0.254999	-0.400907	-0.518102	-0.594072	-0.65076	-0.660417	-0.662163	-0.73	-0.878848
0.709072	0.719405	0.608515	0.428631	0.237887	0.131695	0.11002	0.154874	0.130397	-0.00965845	-0.227731	-0.408471	-0.511614	-0.501155	-0.398718	-0.266796	-0.173815	-0.154564	-0.249365	-0.434047	-0.596165	-0.647671	-0.661891	-0.731954	-0.925443	-1.22949	-1.49851	-1.71958	-1.81319	-1.76576	-1.57958	-1.33292	-1.04763	-0.836259	-0.708984	-0.639098	-0.625486	-0.630288	-0.635985	-0.603545	-0.531593	-0.392298	-0.253741	-0.159312	-0.158044	-0.232659	-0.29792	-0.364016	-0.484135	-0.654345
0.551054	0.570312	0.551067	0.47059	0.320358	0.172025	0.0300261	-0.063406	-0.12464	-0.164836	-0.260558	-0.354902	-0.37164	-0.290981	-0.0740049	0.168846	0.397183	0.475563	0.374779	0.146566	-0.0909515	-0.242057	-0.296659	-0.288824	-0.266487	-0.175267	-0.125461	-0.13131	-0.191616	-0.318247	-0.46944	-0.611994	-0.630826	-0.507402	-0.310735	-0.158601	-0.0747131	-0.159722	-0.347979	-0.608057	-0.883346	-1.07137	-1.02514	-0.794581	-0.479224	-0.219757	-0.0870544	-0.115527	-0.278586	-0.464944
0.0603567	-0.0897513	-0.159748	-0.131581	0.00229678	0.161973	0.29469	0.322669	0.247163	0.113334	-0.0171287	-0.108929	-0.255854	-0.405838	-0.541482	-0.592329	-0.556056	-0.427449	-0.202105	0.0343936	0.278764	0.508041	0.691564	0.767872	0.692666	0.528933	0.336554	0.158459	0.0175732	-0.0401887	-0.0468114	-0.0834853	-0.152973	-0.233899	-0.340526	-0.483529	-0.611094	-0.677671	-0.670345	-0.595873	-0.467064	-0.265477	-0.0867496	0.0932787	0.245068	0.324298	0.438839	0.575199	0.714202	0.820041
1.34028	1.29964	1.19452	1.04203	0.880664	0.754988	0.63287	0.521651	0.410378	0.267765	0.145626	0.127718	0.179944	0.319791	0.480036	0.569062	0.580564	0.543209	0.516209	0.562821	0.658302	0.776715	0.873122	0.970021	0.96491	0.877968	0.711171	0.535421	0.374805	0.203193	0.0242965	-0.164356	-0.247236	-0.228651	-0.131454	0.0043754	0.178387	0.393786	0.623649	0.786256	0.879335	0.901344	0.889171	0.832246	0.747465	0.577974	0.390908	0.200002	0.0768401	-0.000177924
0.44634	0.641031	0.74552	0.708697	0.586758	0.482386	0.383794	0.33958	0.281524	0.251985	0.218412	0.202104	0.261821	0.36609	0.422122	0.419528	0.319892	0.18792	0.0869875	0.0447133	0.0428866	0.0013737	-0.139335	-0.271548	-0.369767	-0.422204	-0.410224	-0.435177	-0.521366	-0.614849	-0.642419	-0.513602	-0.302437	-0.0410991	0.146607	0.176271	0.0536965	-0.147506	-0.303991	-0.397208	-0.392675	-0.339516	-0.251265	-0.182164	-0.14877	-0.0937957	-0.0470326	-0.0694677	-0.208365	-0.373412
1.38105	1.19908	1.05036	0.892378	0.75059	0.65026	0.583678	0.544973	0.540526	0.577885	0.599884	0.637819	0.699633	0.850984	1.01338	1.11697	1.10477	1.01091	0.895842	0.824573	0.79238	0.699078	0.581361	0.471925	0.469523	0.561389	0.674094	0.678449	0.540007	0.324159	0.129299	0.0352921	-0.0350042	-0.119413	-0.249677	-0.407709	-0.5713	-0.669745	-0.666728	-0.615059	-0.527074	-0.475292	-0.466321	-0.483269	-0.531288	-0.535628	-0.529033	-0.49942	-0.475738	-0.380829
0.660612	0.304655	0.0194101	-0.158912	-0.201461	-0.0955534	0.0146777	0.11388	0.141999	0.125645	0.111968	0.104463	0.0433262	-0.0874329	-0.168267	-0.233573	-0.247633	-0.281551	-0.281031	-0.322602	-0.372453	-0.444632	-0.484962	-0.420072	-0.271267	-0.044007	0.138115	0.240364	0.244222	0.233829	0.188642	0.120258	-0.00848422	-0.191025	-0.358486	-0.457901	-0.49718	-0.516938	-0.554859	-0.607893	-0.709608	-0.791473	-0.812318	-0.820553	-0.781473	-0.698816	-0.596524	-0.454867	-0.299534	-0.129266
-0.685817	-0.631512	-0.501845	-0.320067	-0.0940927	0.0847512	0.18337	0.187091	0.177066	0.133484	0.0675283	-0.0566435	-0.232704	-0.394219	-0.490104	-0.527989	-0.547046	-0.58362	-0.634772	-0.732876	-0.811834	-0.831939	-0.839882	-0.802189	-0.722467	-0.623807	-0.487178	-0.337361	-0.173138	-0.0187769	0.069197	0.0217943	-0.146647	-0.420213	-0.692148	-0.887565	-0.982334	-0.972551	-0.898626	-0.780396	-0.641873	-0.511879	-0.418766	-0.370761	-0.379443	-0.39166	-0.444561	-0.514332	-0.584634	-0.644802
0.0234284	0.197172	0.336227	0.433352	0.461684	0.452715	0.470576	0.491525	0.480159	0.438484	0.325678	0.174126	0.0722306	0.0172745	0.0212034	0.140926	0.280424	0.445422	0.570695	0.651332	0.614121	0.448095	0.198949	0.0293507	0.00844959	0.0949501	0.191137	0.297313	0.36334	0.419866	0.52328	0.637149	0.735473	0.728353	0.62417	0.450967	0.28359	0.245007	0.347127	0.498449	0.582725	0.512523	0.288618	0.0106251	-0.287803	-0.504919	-0.630881	-0.602357	-0.451366	-0.209724
-0.870609	-0.936642	-1.00873	-1.02101	-0.970667	-0.880736	-0.745127	-0.557596	-0.382513	-0.306293	-0.317134	-0.404538	-0.559974	-0.696405	-0.794162	-0.770141	-0.734949	-0.699489	-0.69439	-0.739474	-0.840335	-0.907962	-0.839845	-0.648541	-0.371591	-0.165823	-0.152143	-0.376444	-0.706554	-0.953547	-1.00717	-0.830477	-0.50094	-0.232614	-0.101493	-0.102287	-0.155907	-0.265324	-0.336548	-0.404735	-0.481909	-0.566396	-0.547899	-0.352032	-0.0107151	0.375701	0.643487	0.731024	0.651623	0.510311
-1.08657	-0.839033	-0.513979	-0.138995	0.127459	0.253796	0.252997	0.199068	0.089019	0.0173833	-0.0511981	-0.128818	-0.213793	-0.195189	0.00180978	0.345099	0.733748	1.00308	1.09112	1.01126	0.869135	0.712011	0.5808	0.547996	0.604655	0.689842	0.808445	0.822272	0.817664	0.738424	0.631809	0.52097	0.432364	0.439518	0.478709	0.571174	0.662192	0.739189	0.779398	0.750843	0.652687	0.535947	0.43653	0.35016	0.340593	0.296257	0.205871	0.0926191	0.0117912	0.00212048
-0.13063	-0.322653	-0.471203	-0.521174	-0.40347	-0.196211	-0.00967583	0.0746545	0.0646417	0.127313	0.272487	0.487404	0.721731	0.879411	0.920927	0.82702	0.653871	0.537806	0.471977	0.501059	0.532522	0.553337	0.545931	0.56435	0.505254	0.346277	0.0174766	-0.449866	-0.920197	-1.30082	-1.43247	-1.33756	-1.05776	-0.694276	-0.347451	-0.203268	-0.20935	-0.433581	-0.721393	-0.966884	-1.07604	-1.02871	-0.794752	-0.453843	-0.128478	0.132674	0.358653	0.571058	0.619985	0.507877
0.852508	0.905332	0.883585	0.764231	0.593556	0.482657	0.418641	0.446922	0.477519	0.49776	0.490558	0.508471	0.451002	0.296402	-0.0233448	-0.477819	-0.935199	-1.30535	-1.43336	-1.34107	-1.06897	-0.715499	-0.378224	-0.238011	-0.243926	-0.461983	-0.741869	-0.9806	-1.08675	-1.04073	-0.813208	-0.481687	-0.165281	0.0886801	0.308437	0.514993	0.562574	0.453552	0.207753	-0.129331	-0.410413	-0.528777	-0.462895	-0.32325	-0.219934	-0.202182	-0.218487	-0.245919	-0.30392	-0.290652
-0.0238957	-0.379281	-0.792293	-1.19423	-1.51544	-1.62681	-1.53699	-1.27217	-0.928158	-0.59991	-0.46345	-0.469206	-0.681427	-0.953822	-1.18616	-1.28947	-1.24468	-1.02325	-0.700603	-0.392666	-0.145502	0.0683736	0.269401	0.315708	0.209605	-0.0296156	-0.357678	-0.631237	-0.746433	-0.682315	-0.546407	-0.445856	-0.428579	-0.444448	-0.471145	-0.527594	-0.514681	-0.442503	-0.325126	-0.212491	-0.101402	0.0419654	0.0952292	0.0800339	0.0175111	-0.0601365	-0.196081	-0.359389	-0.483937	-0.581773
0.369574	0.246639	0.161694	0.149215	0.17883	0.275089	0.367389	0.454468	0.463855	0.403572	0.319579	0.204929	0.161603	0.170855	0.21029	0.310536	0.46179	0.603371	0.684191	0.665741	0.562671	0.456207	0.419663	0.420571	0.40045	0.328254	0.280746	0.271842	0.256378	0.252781	0.210209	0.117707	0.0196458	-0.0452973	-0.0114256	0.11743	0.236691	0.24357	0.12582	-0.0854823	-0.281716	-0.395101	-0.360231	-0.202024	0.00807886	0.192852	0.314335	0.345119	0.295887	0.224259
-0.519786	-0.421109	-0.386551	-0.443855	-0.571972	-0.698818	-0.714317	-0.551922	-0.188712	0.225898	0.604048	0.804781	0.792271	0.644988	0.540191	0.546803	0.741941	1.04458	1.40376	1.6209	1.60028	1.34415	0.915757	0.434203	0.134248	0.140673	0.370008	0.665898	0.851809	0.84986	0.657074	0.415417	0.157653	-0.111281	-0.333903	-0.529253	-0.64842	-0.707858	-0.754573	-0.78083	-0.756926	-0.649575	-0.495078	-0.347867	-0.229751	-0.14243	-0.0364618	0.0257332	0.0573271	0.0461147
0.326626	0.432657	0.471611	0.540538	0.643581	0.856319	1.12415	1.34031	1.49416	1.50315	1.50349	1.45871	1.40304	1.25702	1.0169	0.695026	0.39952	0.237095	0.123545	0.0765503	0.00366543	-0.135985	-0.310361	-0.469558	-0.562218	-0.57696	-0.559277	-0.524222	-0.453337	-0.390053	-0.310031	-0.194457	-0.0771258	-0.000799118	0.141847	0.305396	0.452681	0.529008	0.460781	0.312849	0.113002	-0.0477172	-0.107584	-0.115939	-0.159113	-0.236656	-0.291352	-0.252829	-0.0848587	0.129178
1.26193	1.39992	1.49422	1.5701	1.53608	1.52433	1.47763	1.41959	1.26734	1.01698	0.681381	0.373272	0.20392	0.0855276	0.036529	-0.0394642	-0.185071	-0.366883	-0.53287	-0.629481	-0.644852	-0.626415	-0.589864	-0.515957	-0.449974	-0.366539	-0.246036	-0.123701	-0.0441191	0.10461	0.275134	0.4287	0.508282	0.437147	0.282905	0.0745353	-0.0930382	-0.155458	-0.164169	-0.209185	-0.290035	-0.347064	-0.306898	-0.131764	0.0914011	0.241691	0.257599	0.0836602	-0.157995	-0.423401
1.26052	1.26587	1.23426	1.18792	1.05689	0.826441	0.517813	0.234463	0.0787194	-0.0301593	-0.0752205	-0.145107	-0.279013	-0.446215	-0.598864	-0.687711	-0.701847	-0.684892	-0.651278	-0.58331	-0.522629	-0.445898	-0.33508	-0.222575	-0.149388	-0.0126104	0.144211	0.285437	0.358624	0.293204	0.151358	-0.0402683	-0.194376	-0.25178	-0.259791	-0.301189	-0.375542	-0.427988	-0.39105	-0.229989	-0.0247578	0.113455	0.128085	-0.0318766	-0.254113	-0.498191	-0.686789	-0.774038	-0.779398	-0.734561
-0.0610643	-0.109401	-0.18269	-0.32329	-0.480828	-0.623615	-0.707689	-0.721066	-0.705021	-0.673214	-0.608897	-0.551477	-0.478869	-0.374004	-0.267544	-0.19829	-0.0688614	0.0795341	0.213172	0.282427	0.220522	0.0862967	-0.0950333	-0.240861	-0.29518	-0.302761	-0.341935	-0.412293	-0.461921	-0.426968	-0.274561	-0.0803561	0.0504304	0.0642746	-0.0870925	-0.297388	-0.528352	-0.706816	-0.789378	-0.79445	-0.752022	-0.611246	-0.423271	-0.287259	-0.2238	-0.214572	-0.27223	-0.336795	-0.396517	-0.394584
0.0671159	0.0222069	0.119713	0.359453	0.704326	1.01344	1.17748	1.22096	1.23814	1.22353	1.22603	1.18503	0.997796	0.70562	0.402178	0.167478	0.110373	0.194803	0.30774	0.404146	0.422801	0.363489	0.270399	0.201919	0.149782	0.0773646	-0.05505	-0.274177	-0.468076	-0.536777	-0.413972	-0.142147	0.118098	0.249773	0.199481	0.0680159	-0.0747277	-0.101248	0.0236784	0.217833	0.445552	0.611	0.666042	0.611653	0.525785	0.460054	0.398258	0.310563	0.201114	0.129791
-0.00490479	0.120063	0.247759	0.391652	0.487268	0.497412	0.446843	0.320596	0.211403	0.081235	-0.0235379	-0.0895386	-0.0507208	0.0781509	0.199898	0.269787	0.290411	0.295492	0.348441	0.470357	0.66216	0.890602	1.023	1.09222	1.08524	1.06731	1.02637	0.965479	0.938247	0.853992	0.559766	0.0817238	-0.376204	-0.649748	-0.56245	-0.147713	0.418974	0.830572	0.921919	0.741208	0.493602	0.366075	0.442096	0.629396	0.785788	0.886117	0.883381	0.802731	0.704514	0.677984
0.139061	0.283104	0.416185	0.406804	0.120105	-0.391306	-0.904276	-1.2107	-1.11291	-0.648321	-0.0135184	0.447553	0.54988	0.347448	0.0700799	-0.0727764	0.0123822	0.222196	0.397387	0.509775	0.50671	0.416366	0.306344	0.276625	0.273118	0.26259	0.222197	0.166363	0.0954904	0.0491409	0.0113797	-0.0642786	-0.134757	-0.269837	-0.388967	-0.456274	-0.468015	-0.454257	-0.531571	-0.62339	-0.754798	-0.823886	-0.938524	-1.06977	-1.20963	-1.35048	-1.40394	-1.34936	-1.18181	-0.955471
0.6114	0.858801	1.09333	1.30365	1.42401	1.38698	1.19264	0.922891	0.71042	0.576542	0.519347	0.462444	0.415751	0.304883	0.192422	0.0949384	0.0228677	-0.0666008	-0.232215	-0.403592	-0.538431	-0.529108	-0.375173	-0.17268	-0.0611279	-0.0637793	-0.136283	-0.213792	-0.199686	-0.133752	-0.025743	0.0885345	0.1585	0.231678	0.341295	0.351304	0.247547	0.095224	0.0110934	0.108664	0.313443	0.483355	0.575539	0.519939	0.384467	0.189055	0.000425564	-0.134961	-0.221081	-0.278638
0.635822	0.398034	0.125832	-0.112081	-0.227691	-0.144437	0.0617422	0.232816	0.32563	0.26965	0.133252	-0.0634959	-0.253415	-0.389727	-0.476435	-0.534386	-0.489889	-0.358393	-0.197263	-0.0365115	0.0163305	0.036555	0.0698909	0.104686	0.229737	0.345939	0.396621	0.291542	0.135265	-0.00534909	-0.0461749	-0.0286607	0.0463273	0.0898188	-0.00815745	-0.182153	-0.381052	-0.529657	-0.544392	-0.450434	-0.275528	-0.0322943	0.247675	0.526087	0.741589	0.845616	0.861555	0.761792	0.570627	0.290371
0.691772	0.75868	0.807219	0.836681	0.906618	0.98593	1.09601	1.20982	1.25764	1.18031	1.04141	0.974093	0.992629	1.0382	1.08448	1.03159	0.896024	0.699794	0.544257	0.423907	0.399158	0.408913	0.417572	0.406401	0.382167	0.368989	0.337933	0.297742	0.203994	0.112627	0.0403908	0.0474934	0.153855	0.301495	0.416386	0.424182	0.315668	0.212539	0.146413	0.117182	0.0573174	-0.01211	-0.0207957	0.0519208	0.167815	0.337876	0.459343	0.488935	0.442232	0.295439
0.666306	0.46827	0.186329	-0.0619456	-0.177305	-0.204292	-0.196048	-0.209672	-0.239216	-0.309688	-0.319931	-0.315094	-0.282888	-0.26898	-0.249315	-0.237993	-0.240534	-0.248558	-0.241915	-0.228093	-0.228498	-0.257158	-0.33334	-0.471755	-0.542733	-0.551886	-0.50382	-0.442353	-0.334152	-0.230026	-0.11396	-0.0395968	-0.0555358	-0.166079	-0.311119	-0.410088	-0.426138	-0.345867	-0.212547	-0.0948917	-0.0799992	-0.13526	-0.210783	-0.249623	-0.276816	-0.288054	-0.282503	-0.292924	-0.266133	-0.170962
-0.202899	-0.201702	-0.208969	-0.2464	-0.322667	-0.457384	-0.525752	-0.534568	-0.48827	-0.429064	-0.324843	-0.224546	-0.112749	-0.0411206	-0.0564733	-0.162951	-0.302657	-0.397985	-0.413445	-0.336126	-0.20771	-0.0943817	-0.080037	-0.133265	-0.206011	-0.243422	-0.269615	-0.28044	-0.275093	-0.285131	-0.259325	-0.167654	-0.0208512	0.167986	0.350989	0.523686	0.657387	0.751777	0.770495	0.750325	0.741374	0.756507	0.761887	0.737443	0.656888	0.592051	0.555315	0.579368	0.648804	0.722524
0.895217	0.999527	1.05383	1.01837	0.936055	0.777571	0.586194	0.424267	0.316044	0.247226	0.19932	0.215811	0.25543	0.347747	0.426961	0.495923	0.476742	0.407308	0.300932	0.19868	0.137104	0.122806	0.0966858	0.0766438	0.0185595	-0.020476	0.0254113	0.129683	0.237068	0.294768	0.314656	0.321678	0.372343	0.448067	0.507397	0.48118	0.413837	0.427505	0.520059	0.675441	0.822728	0.892754	0.925823	0.911374	0.870552	0.733684	0.529238	0.288955	0.0521442	-0.117107
0.623207	0.648226	0.688183	0.703781	0.713072	0.693557	0.682049	0.726518	0.809055	0.855567	0.814872	0.643028	0.351055	-0.00319468	-0.2895	-0.461635	-0.518565	-0.512213	-0.469177	-0.353772	-0.160092	0.0561262	0.220593	0.325427	0.334378	0.232555	0.00783434	-0.168352	-0.295691	-0.337927	-0.270529	-0.126919	-0.0286898	0.0489084	0.091115	0.0532793	0.002908	-0.183025	-0.354485	-0.430966	-0.442526	-0.366561	-0.218244	-0.0285631	0.204054	0.423167	0.570168	0.580232	0.399902	0.038845
0.182534	0.348858	0.417692	0.476836	0.521452	0.582777	0.65541	0.683174	0.633237	0.582068	0.578438	0.667617	0.740362	0.706847	0.521168	0.242599	0.00420333	-0.122587	-0.128151	-0.0733163	-0.0230641	-0.0178129	-0.0436906	-0.0754305	-0.104934	-0.138287	-0.150192	-0.24967	-0.372726	-0.544216	-0.680122	-0.759995	-0.728725	-0.57506	-0.412712	-0.307986	-0.22966	-0.184065	-0.174294	-0.191272	-0.24223	-0.291107	-0.351045	-0.39056	-0.364906	-0.302657	-0.224423	-0.178931	-0.176001	-0.224172
-0.461142	-0.15595	0.158166	0.42478	0.620895	0.747655	0.818097	0.816217	0.890955	0.983374	1.062	1.07988	0.937391	0.635465	0.255128	-0.0692733	-0.255365	-0.24403	-0.144071	-0.0361201	0.0307607	0.0703853	0.118665	0.208228	0.327824	0.429961	0.491837	0.399501	0.21102	0.0966375	0.0864615	0.188127	0.354894	0.438316	0.383882	0.23369	0.0418981	-0.0560794	-0.0655277	-0.0176026	-0.035174	-0.143896	-0.352827	-0.590316	-0.881915	-1.10797	-1.16264	-1.03532	-0.798061	-0.597382
-0.299972	-0.356473	-0.423597	-0.518059	-0.561998	-0.546626	-0.415661	-0.208199	-0.0648398	-0.0195745	-0.104897	-0.301142	-0.369675	-0.246309	0.0225078	0.31746	0.546206	0.633611	0.590438	0.474615	0.287795	0.126242	-0.0203589	-0.106546	-0.124974	-0.0340356	0.0736725	0.212971	0.32327	0.354463	0.323019	0.195748	-0.00131108	-0.262238	-0.510465	-0.652018	-0.637133	-0.543348	-0.365297	-0.183459	-0.0244684	0.0338954	0.00562006	-0.0905875	-0.232591	-0.37776	-0.498239	-0.545421	-0.59835	-0.553924
0.473996	0.367497	0.27563	0.130198	-0.00671778	-0.129614	-0.210877	-0.228253	-0.14251	-0.040955	0.0903851	0.194383	0.223793	0.194146	0.0741463	-0.111655	-0.357674	-0.59172	-0.725185	-0.711151	-0.622724	-0.454846	-0.283396	-0.133489	-0.0784595	-0.105119	-0.19583	-0.329721	-0.466597	-0.580192	-0.624679	-0.674583	-0.632696	-0.541318	-0.338769	-0.101743	0.100712	0.187764	0.142698	0.0324486	-0.114931	-0.285587	-0.465368	-0.522084	-0.509603	-0.381761	-0.189694	0.00782988	0.188992	0.292372
-0.334573	-0.321697	-0.288504	-0.179836	-0.0701373	0.0618381	0.169036	0.199351	0.168792	0.0450997	-0.146418	-0.400008	-0.641256	-0.778828	-0.764362	-0.673214	-0.50017	-0.323445	-0.168925	-0.112202	-0.139682	-0.233185	-0.371195	-0.512282	-0.629373	-0.675229	-0.726669	-0.683493	-0.589303	-0.380522	-0.136202	0.0724824	0.162213	0.115761	0.00211886	-0.149796	-0.325703	-0.511017	-0.569477	-0.556612	-0.424836	-0.226859	-0.0232573	0.16348	0.270041	0.264367	0.209392	0.0998811	-0.0563031	-0.155612
-0.17896	-0.0545748	0.110199	0.298428	0.508967	0.690797	0.784376	0.750838	0.646352	0.518599	0.457334	0.469841	0.542718	0.643098	0.802417	0.993117	1.16008	1.27275	1.29154	1.21188	1.06476	0.952885	0.91874	0.942286	0.960883	0.931843	0.803721	0.676532	0.591201	0.565762	0.541132	0.456396	0.352058	0.274135	0.205572	0.157019	0.130433	0.0950017	0.138818	0.14206	0.176536	0.204867	0.222163	0.312901	0.425205	0.502119	0.498107	0.378444	0.223151	0.116042
0.637199	0.464846	0.279726	0.124811	0.0252278	-0.0491588	-0.0993132	-0.126777	-0.163377	-0.118115	-0.114766	-0.0791527	-0.0498869	-0.0320208	0.0617105	0.177718	0.25717	0.253026	0.129415	-0.0310005	-0.141643	-0.164117	-0.047371	0.143333	0.358815	0.515722	0.519478	0.422253	0.294484	0.1695	0.0770017	0.0278319	0.0322357	0.0648048	0.128291	0.196035	0.226448	0.207061	0.258229	0.342377	0.456865	0.439502	0.305118	0.143866	0.00478744	-0.0619582	-0.0342089	0.058413	0.160655	0.260278
-0.279611	-0.190087	-0.152145	-0.140681	-0.145923	-0.172558	-0.127709	-0.12439	-0.0891009	-0.0601016	-0.0423981	0.0504798	0.165432	0.24416	0.240053	0.117568	-0.0413871	-0.151022	-0.173291	-0.0576086	0.131359	0.34488	0.500358	0.50408	0.40774	0.281134	0.157288	0.0656318	0.0169096	0.0212733	0.053546	0.116454	0.183582	0.213718	0.194507	0.24521	0.328591	0.442037	0.424832	0.291671	0.131887	-0.00592501	-0.072063	-0.0445663	0.0472123	0.148523	0.24724	0.315775	0.381375	0.431341
0.0346514	-0.0202492	-0.0613398	-0.0829869	-0.00341065	0.106609	0.188432	0.184164	0.0568635	-0.10834	-0.222285	-0.245429	-0.125199	0.0711971	0.293111	0.454701	0.458569	0.358442	0.22686	0.0981449	0.0028859	-0.0477515	-0.0432162	-0.00967499	0.055706	0.125472	0.156793	0.136827	0.189523	0.276182	0.394087	0.376206	0.237811	0.0717459	-0.0714837	-0.140222	-0.111644	-0.0162576	0.0890358	0.191633	0.262862	0.331041	0.382971	0.347731	0.275607	0.179475	0.0586916	-0.00913456	-0.0488943	-0.0364193
-0.743921	-0.697241	-0.633005	-0.559007	-0.455701	-0.309364	-0.0964408	0.126324	0.342077	0.468202	0.541771	0.569852	0.553857	0.518125	0.4346	0.323108	0.239281	0.174978	0.0629005	-0.0423517	-0.12034	-0.172565	-0.273971	-0.435132	-0.604085	-0.695863	-0.670269	-0.491599	-0.209731	0.02053	0.120626	0.0704893	-0.0638504	-0.217869	-0.360735	-0.500758	-0.593335	-0.595188	-0.546053	-0.427186	-0.283486	-0.163783	-0.154621	-0.207084	-0.298754	-0.311167	-0.236766	-0.0875954	0.0943793	0.27763
0.648438	0.462755	0.268174	0.0805355	-0.0837086	-0.224044	-0.363348	-0.45545	-0.457292	-0.40841	-0.290154	-0.147193	-0.0281048	-0.0189896	-0.0711828	-0.162382	-0.174731	-0.100712	0.0476916	0.228731	0.41104	0.482987	0.478864	0.396615	0.307424	0.265293	0.218	0.143562	0.127923	0.242385	0.485515	0.788463	1.00015	1.11442	1.08166	0.942095	0.804423	0.720146	0.740437	0.822758	0.839065	0.752084	0.573439	0.413726	0.389076	0.489546	0.584078	0.54977	0.376315	0.0876948
-1.0832	-1.01163	-0.924446	-0.720889	-0.495035	-0.351785	-0.306721	-0.381686	-0.514025	-0.598826	-0.746929	-0.881936	-0.978898	-1.00834	-0.934527	-0.701852	-0.421169	-0.159199	-0.0539006	-0.0756373	-0.196747	-0.352405	-0.406113	-0.403348	-0.349885	-0.389713	-0.499456	-0.603918	-0.70263	-0.724947	-0.712621	-0.722685	-0.747391	-0.737567	-0.726768	-0.711531	-0.720474	-0.717384	-0.722729	-0.734428	-0.775876	-0.80458	-0.793914	-0.743809	-0.726711	-0.766139	-0.836099	-0.969335	-1.0263	-0.995902
0.12075	0.331872	0.482128	0.482006	0.366996	0.209981	0.134467	0.153773	0.232762	0.28896	0.32422	0.277133	0.204629	0.148429	0.0882782	0.13336	0.247262	0.38697	0.531097	0.630276	0.666772	0.710847	0.76339	0.821821	0.834765	0.795062	0.76726	0.746735	0.723878	0.673407	0.606347	0.531453	0.425634	0.274999	0.117331	-0.0385756	-0.150921	-0.176524	-0.13385	-0.0176768	0.149326	0.333185	0.492747	0.550161	0.48086	0.352314	0.245253	0.156226	0.0829482	0.0470912
-0.298838	-0.255046	-0.231586	-0.193246	-0.12355	0.0496226	0.202976	0.231779	0.156667	-0.0322123	-0.179839	-0.221093	-0.112718	0.0228302	0.0937392	0.0400001	-0.0523155	-0.0912529	-0.0264959	0.171088	0.374702	0.507422	0.482819	0.357895	0.221957	0.192339	0.301239	0.493516	0.656177	0.675532	0.574593	0.434703	0.299899	0.206405	0.168191	0.109415	0.0331612	-0.047303	-0.107969	-0.124012	-0.111375	-0.0708459	-0.0218182	0.00851217	0.0263256	0.0906072	0.110498	0.0595195	-0.0881779	-0.301751
0.853156	1.01504	1.07918	1.11786	1.03665	0.948823	0.920495	0.946743	1.01497	1.01366	0.904756	0.763175	0.646925	0.628966	0.763996	0.949451	1.10705	1.12426	1.05021	0.890388	0.735684	0.662396	0.682074	0.854568	1.14276	1.40358	1.51397	1.39432	1.10695	0.758539	0.426737	0.137299	-0.124237	-0.372064	-0.490073	-0.419819	-0.266914	-0.0868585	-0.0744429	-0.190794	-0.385975	-0.503389	-0.484902	-0.250102	0.0381585	0.27649	0.32993	0.218855	0.070542	0.0362418
0.311123	0.174176	0.115167	0.130608	0.25258	0.431138	0.602658	0.702059	0.621339	0.427998	0.151906	-0.0266861	-0.0596744	0.000112765	0.0779236	0.148278	0.197304	0.206766	0.21506	0.266684	0.406121	0.625991	0.884294	1.13615	1.3136	1.3826	1.30157	1.11363	0.884162	0.641749	0.432317	0.305557	0.299528	0.37543	0.46913	0.487678	0.398394	0.197994	-0.0408986	-0.25034	-0.362617	-0.377158	-0.360583	-0.387141	-0.438984	-0.532594	-0.634721	-0.73337	-0.798861	-0.815302
0.170793	0.190019	0.142197	0.00792197	-0.218515	-0.472699	-0.697062	-0.817339	-0.832916	-0.815161	-0.843611	-0.899147	-0.999427	-1.10883	-1.21451	-1.28466	-1.30228	-1.25721	-1.14512	-0.967413	-0.779498	-0.597997	-0.428833	-0.304214	-0.297951	-0.392211	-0.495495	-0.61448	-0.743077	-0.864685	-0.983693	-1.07172	-1.11493	-1.10198	-1.02355	-0.854762	-0.711956	-0.638618	-0.675931	-0.778798	-0.851356	-0.791496	-0.676885	-0.63078	-0.720454	-0.941878	-1.15796	-1.2845	-1.31885	-1.31851
0.887838	0.857392	0.861573	0.873339	0.941164	1.02803	1.04421	0.939329	0.689623	0.437874	0.284213	0.364388	0.620574	0.936315	1.17864	1.31896	1.36598	1.33883	1.25964	1.21695	1.07793	0.920916	0.714531	0.565256	0.503119	0.529632	0.627896	0.722724	0.844163	0.915757	0.934629	0.8779	0.74613	0.516749	0.247321	-0.0377999	-0.231169	-0.276203	-0.144278	0.0761233	0.246672	0.372686	0.472866	0.473802	0.367857	0.116947	-0.182837	-0.471891	-0.727991	-0.909732
0.909745	0.946549	0.994418	0.977699	0.860607	0.610289	0.364631	0.214688	0.292923	0.542911	0.851014	1.08748	1.2244	1.27028	1.24379	1.16652	1.12486	0.989199	0.835988	0.634595	0.488931	0.428298	0.454169	0.550056	0.64259	0.761091	0.830953	0.849368	0.794011	0.66543	0.441598	0.178688	-0.0995353	-0.288226	-0.332171	-0.203437	0.0116318	0.178054	0.30102	0.398776	0.39969	0.296308	0.0514684	-0.241064	-0.523125	-0.773029	-0.950374	-1.00107	-0.965495	-0.888254
1.02296	0.806735	0.624318	0.412049	0.266167	0.205074	0.230612	0.325264	0.416607	0.533581	0.602544	0.620722	0.566078	0.439152	0.218202	-0.0413221	-0.315963	-0.502225	-0.545604	-0.418527	-0.206228	-0.0419481	0.0794345	0.175932	0.176834	0.0747831	-0.166904	-0.45567	-0.734099	-0.980786	-1.15585	-1.20589	-1.17077	-1.09453	-0.983114	-0.931441	-0.910224	-0.931743	-0.961836	-0.962264	-0.83036	-0.601774	-0.31613	-0.068618	0.0656967	0.0684566	-0.00394678	-0.106992	-0.208744	-0.253682
0.929362	0.855022	0.700425	0.534587	0.372204	0.267443	0.244994	0.31797	0.450926	0.681267	0.934186	1.12536	1.08276	0.824542	0.506134	0.26666	0.167968	0.188888	0.338466	0.468177	0.547666	0.541354	0.552739	0.587117	0.662474	0.750421	0.857128	0.845499	0.747217	0.595008	0.394413	0.216882	0.144493	0.183644	0.310055	0.38916	0.354901	0.191641	-0.075535	-0.336648	-0.573094	-0.747878	-0.797716	-0.656878	-0.418161	-0.164951	-0.0416877	-0.070073	-0.237323	-0.486139
0.62672	0.446626	0.302154	0.21961	0.211193	0.287746	0.420078	0.649336	0.901067	1.09135	1.04894	0.791938	0.475027	0.236678	0.13845	0.159272	0.308146	0.437248	0.516363	0.510081	0.521412	0.555629	0.630632	0.718166	0.824371	0.812796	0.714976	0.563483	0.36383	0.187134	0.115086	0.154052	0.279869	0.358602	0.324505	0.162011	-0.103909	-0.363794	-0.599129	-0.773092	-0.822695	-0.68252	-0.444924	-0.192905	-0.0702204	-0.0984723	-0.264937	-0.512583	-0.637412	-0.566264
-0.997441	-0.826871	-0.610889	-0.356914	-0.0978893	0.10332	0.274416	0.390638	0.441926	0.447671	0.368581	0.222945	0.0965717	0.0699256	0.0386942	-0.00305146	-0.0280699	0.0440871	0.185721	0.391838	0.652695	0.892892	1.09456	1.31199	1.45001	1.5016	1.40161	1.24924	1.08874	0.95328	0.85387	0.733841	0.624284	0.569221	0.536869	0.461434	0.325687	0.118169	-0.0898054	-0.246916	-0.375257	-0.463954	-0.546146	-0.66011	-0.728167	-0.739994	-0.656814	-0.551625	-0.538676	-0.653712
0.811531	0.866845	0.864432	0.855614	0.836352	0.885425	1.00862	1.19443	1.37028	1.50921	1.58975	1.60411	1.54219	1.42802	1.32032	1.12954	0.926307	0.749024	0.582442	0.42164	0.238447	0.0972	-0.0443618	-0.173222	-0.284731	-0.28435	-0.27908	-0.214662	-0.138495	-0.00694001	0.0970445	0.155421	0.151805	0.0895558	-0.0660566	-0.295592	-0.533636	-0.724102	-0.805486	-0.731179	-0.577313	-0.433509	-0.386903	-0.447972	-0.550471	-0.585949	-0.555546	-0.512014	-0.46252	-0.388849
0.927996	0.881295	0.830161	0.718987	0.534484	0.291402	0.0369041	-0.156506	-0.198641	-0.126245	-0.0255787	0.0483906	0.03862	0.00927509	-0.00783011	0.0250992	0.119963	0.279353	0.476676	0.612199	0.654392	0.585721	0.383667	0.109506	-0.189652	-0.459092	-0.624734	-0.616034	-0.47699	-0.290427	-0.184619	-0.226096	-0.375594	-0.521161	-0.564428	-0.510336	-0.447842	-0.424392	-0.449304	-0.489433	-0.487398	-0.487067	-0.483444	-0.503794	-0.528385	-0.578293	-0.671895	-0.793521	-0.925927	-0.995142
-0.714436	-0.542643	-0.339809	-0.0960721	0.147939	0.350889	0.429269	0.409899	0.273999	0.0749159	-0.0423241	-0.0541893	-0.0274281	-0.00440334	-0.0318684	-0.0399195	0.00290281	0.0823814	0.14326	0.155262	0.0691217	-0.144992	-0.461808	-0.76892	-0.910868	-0.823839	-0.593826	-0.361048	-0.234078	-0.267953	-0.35358	-0.405294	-0.40998	-0.322325	-0.203521	-0.154863	-0.142942	-0.134723	-0.133671	-0.172185	-0.281266	-0.458987	-0.590365	-0.659152	-0.6175	-0.50567	-0.419872	-0.367051	-0.340776	-0.343319
0.539765	0.558212	0.498377	0.410833	0.236722	0.0141423	-0.114394	-0.127403	-0.098063	-0.0728197	-0.102931	-0.111758	-0.0648096	0.0223271	0.0890716	0.10223	0.00778982	-0.226955	-0.574297	-0.911001	-1.06663	-0.971212	-0.719036	-0.463828	-0.324625	-0.361763	-0.455641	-0.512338	-0.517475	-0.421375	-0.291123	-0.237777	-0.224708	-0.215696	-0.214543	-0.256768	-0.376359	-0.571205	-0.715242	-0.790657	-0.744992	-0.622386	-0.52832	-0.470411	-0.441604	-0.444392	-0.474707	-0.505634	-0.558272	-0.572774
0.179441	0.0198489	-0.155188	-0.361315	-0.505164	-0.572404	-0.530008	-0.416181	-0.32885	-0.275086	-0.248341	-0.25093	-0.279075	-0.307787	-0.356657	-0.370121	-0.349244	-0.278424	-0.131461	0.0240765	0.174089	0.211469	0.086354	-0.139885	-0.344585	-0.412343	-0.264657	0.00331854	0.267102	0.500485	0.686518	0.873361	0.987699	1.0184	0.942641	0.806632	0.604525	0.398045	0.23461	0.173854	0.157314	0.152825	0.0779629	-0.0393923	-0.174563	-0.302022	-0.383862	-0.397973	-0.338377	-0.230433
-0.0382811	-0.0352281	-0.0969289	-0.241272	-0.431306	-0.639038	-0.763751	-0.721689	-0.496732	-0.149844	0.245517	0.575071	0.760836	0.823869	0.761291	0.580405	0.331764	0.00689225	-0.281834	-0.482694	-0.608112	-0.645014	-0.628544	-0.586073	-0.556162	-0.507196	-0.356534	-0.136759	0.114223	0.297252	0.381297	0.371471	0.365771	0.322307	0.291779	0.19211	0.0285399	-0.191008	-0.355318	-0.41527	-0.331389	-0.199767	-0.068754	0.0238787	0.0462082	0.025107	-0.0754989	-0.150055	-0.206996	-0.237236
0.213558	0.184939	0.179656	0.202543	0.215388	0.257993	0.394302	0.575381	0.720989	0.769652	0.796013	0.823497	0.797982	0.72884	0.559064	0.366654	0.325397	0.451234	0.692011	0.852563	0.855096	0.749908	0.601924	0.519487	0.432916	0.345233	0.192638	0.0320881	-0.116547	-0.163815	-0.0819777	-0.00342365	0.0299359	-0.0601463	-0.150916	-0.0687799	0.180442	0.515412	0.748655	0.808246	0.634564	0.368766	0.0558134	-0.185015	-0.321286	-0.400538	-0.411148	-0.392002	-0.34212	-0.272409
-0.472832	-0.355107	-0.237731	-0.186549	-0.168226	-0.141588	-0.12871	-0.156684	-0.255247	-0.36988	-0.409107	-0.340808	-0.218861	-0.121734	-0.0410285	0.0591751	0.156509	0.274354	0.35358	0.381771	0.317175	0.233286	0.177355	0.209382	0.328668	0.520297	0.711226	0.820662	0.813445	0.736619	0.64651	0.601494	0.650411	0.738768	0.805714	0.886285	0.983955	1.02841	0.988904	0.892594	0.73389	0.554535	0.369836	0.258173	0.262426	0.359973	0.49018	0.614241	0.65864	0.672958
-0.0195491	-0.00568338	-0.0628167	-0.184116	-0.310822	-0.359082	-0.288709	-0.16306	-0.0629844	0.0201717	0.123418	0.223707	0.34513	0.426761	0.455808	0.389251	0.302815	0.245186	0.278185	0.401093	0.59854	0.795266	0.908024	0.900588	0.821429	0.728585	0.682202	0.732605	0.823644	0.892622	0.97564	1.07628	1.12208	1.08138	0.982141	0.818618	0.633817	0.44351	0.328458	0.33284	0.433349	0.567509	0.695336	0.741083	0.755836	0.741766	0.662354	0.519274	0.343644	0.192585
0.4484	0.300529	0.095966	-0.0766166	-0.217544	-0.288707	-0.234461	-0.181481	-0.16904	-0.23778	-0.328556	-0.387548	-0.358727	-0.226296	0.0203838	0.290403	0.49634	0.628631	0.677338	0.631246	0.540553	0.402432	0.283134	0.222155	0.218479	0.206373	0.124937	-0.0404199	-0.229571	-0.322491	-0.284013	-0.146616	0.0056003	0.0876324	0.0621645	-0.116976	-0.413598	-0.74024	-1.00312	-1.13538	-1.13015	-1.04126	-0.904116	-0.77306	-0.64839	-0.576698	-0.574514	-0.693912	-0.870776	-1.10866
0.0212703	-0.103324	-0.212565	-0.279596	-0.257048	-0.209857	-0.192459	-0.231253	-0.267962	-0.29506	-0.260909	-0.175547	-0.117142	-0.156047	-0.240853	-0.336759	-0.383936	-0.386461	-0.337372	-0.258644	-0.21478	-0.192055	-0.177554	-0.129584	-0.0347028	0.0836874	0.147753	0.137342	0.0757755	-0.00371912	-0.0368552	-0.00253841	0.101741	0.297096	0.509251	0.622151	0.586077	0.459697	0.330434	0.313091	0.32299	0.326155	0.245327	0.132896	0.0802294	0.1435	0.269158	0.430557	0.47059	0.390449
0.204559	0.323624	0.45988	0.63068	0.755693	0.768879	0.607846	0.314627	0.00554386	-0.183342	-0.162242	0.0469793	0.391495	0.731923	1.00194	1.15308	1.17297	1.08463	0.893504	0.697895	0.524172	0.459254	0.474416	0.55619	0.627892	0.669387	0.647485	0.652666	0.679735	0.695211	0.657781	0.564622	0.43912	0.31983	0.298922	0.368358	0.484908	0.54034	0.498393	0.379289	0.248386	0.134176	0.0803512	0.0645095	0.0552861	0.0256451	-0.0575708	-0.190452	-0.246943	-0.301514
-0.637894	-0.465254	-0.28166	-0.0474782	0.15511	0.285662	0.304262	0.191667	-0.00232292	-0.253395	-0.491775	-0.611031	-0.591308	-0.503091	-0.341132	-0.22706	-0.168237	-0.143793	-0.129396	-0.0842221	-0.020778	0.0536254	0.120975	0.182748	0.236593	0.283881	0.267734	0.202585	0.104488	-0.0181238	-0.172596	-0.287538	-0.326747	-0.31787	-0.290724	-0.299072	-0.287898	-0.281431	-0.306365	-0.473741	-0.739579	-1.00713	-1.13518	-1.12315	-0.986585	-0.731503	-0.427088	-0.145473	0.136186	0.377769
-0.0885029	0.114735	0.273843	0.37193	0.368949	0.248382	0.0464845	-0.214821	-0.462917	-0.587034	-0.566508	-0.474695	-0.306135	-0.187413	-0.126192	-0.100752	-0.0857683	-0.0387529	0.0272772	0.104713	0.174808	0.239099	0.295139	0.344354	0.327549	0.259744	0.157649	0.0300396	-0.130729	-0.250356	-0.291163	-0.281924	-0.253672	-0.26236	-0.250731	-0.244	-0.269951	-0.444149	-0.720822	-0.999284	-1.13254	-1.12003	-0.977896	-0.712417	-0.395594	-0.102501	0.190639	0.442069	0.573045	0.517895
0.240304	0.146142	-0.012721	-0.238227	-0.464121	-0.581469	-0.560045	-0.464219	-0.288292	-0.164381	-0.100484	-0.0739321	-0.0582931	-0.00922273	0.0596935	0.140514	0.213673	0.280774	0.339263	0.390629	0.37309	0.302322	0.195763	0.0625766	-0.105219	-0.230075	-0.272666	-0.263023	-0.233536	-0.242603	-0.230466	-0.223441	-0.250526	-0.432338	-0.721105	-1.01174	-1.15082	-1.13776	-0.989415	-0.712332	-0.381661	-0.0757567	0.230196	0.492616	0.629317	0.571755	0.335181	0.0890099	-0.037582	0.0545395
0.625961	0.577965	0.491387	0.386271	0.26296	0.123208	-0.0498756	-0.178667	-0.2226	-0.212653	-0.182237	-0.19159	-0.17907	-0.171824	-0.199763	-0.387305	-0.685172	-0.984965	-1.12843	-1.11496	-0.961939	-0.676124	-0.335031	-0.019485	0.29611	0.566801	0.70781	0.648434	0.404404	0.150474	0.0198928	0.114918	0.402601	0.719108	0.877874	0.902655	0.788284	0.683051	0.609369	0.543799	0.420469	0.263242	0.0736088	-0.0314046	-0.0253263	0.0796844	0.199325	0.304324	0.390449	0.525123
-0.772261	-0.817749	-0.862223	-0.857975	-0.736419	-0.482801	-0.133873	0.288764	0.615172	0.763605	0.680247	0.421788	0.0653706	-0.35673	-0.682498	-0.803714	-0.739694	-0.534173	-0.322895	-0.182031	-0.178778	-0.256684	-0.350574	-0.361766	-0.305202	-0.173528	-0.0226427	0.0348476	0.0450329	-0.070936	-0.22791	-0.393685	-0.478567	-0.490066	-0.542114	-0.622307	-0.705945	-0.709018	-0.643792	-0.441344	-0.224141	-0.0593348	0.00691728	0.0691479	0.12299	0.135354	0.0570541	-0.127762	-0.332159	-0.448693
0.251399	0.0492456	-0.182881	-0.407395	-0.570194	-0.65774	-0.704086	-0.682026	-0.646849	-0.562767	-0.499924	-0.450177	-0.407066	-0.309588	-0.183818	-0.0151009	0.111246	0.167407	0.127977	0.0482097	0.0188869	-0.0781414	-0.1687	-0.298396	-0.372197	-0.35094	-0.187089	0.0957033	0.355719	0.44117	0.353347	0.16766	-0.0934152	-0.316913	-0.442255	-0.418368	-0.288206	-0.0822497	0.142804	0.362441	0.445444	0.319616	0.0299091	-0.284079	-0.466319	-0.514014	-0.533549	-0.561932	-0.649182	-0.68052
0.37674	0.229805	0.122261	0.0940043	-0.00526188	-0.100875	-0.242618	-0.323273	-0.300042	-0.120973	0.188086	0.472252	0.56564	0.469659	0.266726	-0.0185982	-0.262854	-0.399838	-0.373732	-0.231481	-0.00639564	0.239561	0.479598	0.57031	0.432795	0.116181	-0.226971	-0.426138	-0.478262	-0.499611	-0.530631	-0.625985	-0.660234	-0.528552	-0.309489	-0.0863032	0.110383	0.230239	0.298443	0.366479	0.430864	0.550186	0.655543	0.699439	0.645436	0.481834	0.273801	0.0726273	-0.0782626	-0.134584
-0.191488	-0.0229269	0.128277	0.260019	0.327747	0.36874	0.373575	0.373309	0.391998	0.348595	0.241249	0.0457285	-0.0926687	-0.125343	-0.0866703	-0.0158021	0.0273189	-0.0383986	-0.181822	-0.323886	-0.415677	-0.422718	-0.356321	-0.274402	-0.149751	-0.0323937	0.1274	0.285368	0.416332	0.497268	0.502531	0.46622	0.359974	0.201447	0.0268952	-0.149285	-0.236764	-0.317266	-0.360221	-0.433461	-0.496484	-0.537822	-0.537882	-0.508072	-0.494441	-0.477265	-0.419845	-0.362534	-0.372859	-0.416527
0.611621	0.521396	0.368041	0.161975	-0.0490654	-0.270795	-0.380183	-0.480847	-0.53456	-0.626142	-0.70495	-0.75664	-0.756716	-0.71944	-0.702395	-0.680918	-0.609117	-0.537452	-0.550363	-0.604967	-0.708155	-0.812021	-0.75309	-0.501936	-0.121729	0.2102	0.388122	0.425892	0.387085	0.302581	0.282512	0.314103	0.414653	0.576223	0.743852	0.875527	0.89757	0.797538	0.541562	0.233117	-0.0982551	-0.350837	-0.520815	-0.639873	-0.68945	-0.603458	-0.431085	-0.241278	-0.0826355	-0.0144291
-0.547273	-0.541193	-0.526381	-0.514809	-0.547509	-0.539745	-0.477302	-0.350334	-0.222757	-0.180868	-0.211688	-0.286569	-0.366478	-0.412429	-0.432213	-0.394874	-0.244294	0.00343669	0.317777	0.628549	0.881957	1.00358	0.974631	0.820474	0.628667	0.481315	0.36425	0.353978	0.41888	0.525953	0.596505	0.714936	0.818244	0.871177	0.852687	0.797488	0.695722	0.54208	0.338506	0.181569	0.106095	0.142557	0.252833	0.322019	0.391946	0.423328	0.432987	0.387446	0.284069	0.148268
-0.377176	-0.341237	-0.259597	-0.0923557	0.156093	0.466397	0.771549	1.02037	1.1398	1.11137	0.960003	0.771664	0.626977	0.512029	0.501942	0.565671	0.670808	0.740084	0.856373	0.957814	1.00979	0.991633	0.937433	0.837507	0.686644	0.486751	0.332651	0.258542	0.294345	0.402627	0.470562	0.539225	0.570039	0.579523	0.534806	0.433298	0.299953	0.163761	0.0658321	-0.0497004	-0.167249	-0.335862	-0.453823	-0.541557	-0.58621	-0.640867	-0.67053	-0.710713	-0.771336	-0.870859
-0.50579	-0.562082	-0.646423	-0.674488	-0.68041	-0.598142	-0.402678	-0.127925	0.150068	0.328005	0.408325	0.44447	0.501799	0.613538	0.769502	0.873454	0.875538	0.773672	0.61236	0.489727	0.466958	0.588637	0.778074	0.903434	0.826087	0.508958	0.0967567	-0.217862	-0.371426	-0.291712	-0.0409773	0.184466	0.330138	0.338408	0.330595	0.339602	0.369869	0.438363	0.499486	0.549979	0.548193	0.520008	0.465721	0.390756	0.288108	0.0999647	-0.133506	-0.290515	-0.339137	-0.319942
0.599208	0.605693	0.556888	0.476811	0.415358	0.359235	0.273556	0.186071	0.0526582	-0.0899023	-0.125807	-0.019241	0.223935	0.516648	0.745628	0.871975	0.902463	0.879559	0.839081	0.795794	0.728532	0.715493	0.749288	0.791315	0.839605	0.915734	1.00043	1.09022	1.20154	1.36072	1.54248	1.66409	1.68785	1.52888	1.25291	0.934163	0.692792	0.520269	0.388154	0.265876	0.167509	0.161146	0.245424	0.378712	0.445939	0.444336	0.448457	0.495461	0.587023	0.659273
1.51724	1.23153	0.934791	0.643875	0.429699	0.274389	0.148963	0.0328768	-0.0605096	-0.0665496	0.0134607	0.139999	0.203823	0.2023	0.206213	0.250836	0.337762	0.406354	0.384078	0.263181	0.107318	0.0285809	0.031063	0.0973729	0.0944764	0.0348754	-0.0419077	-0.0615124	0.0403453	0.221362	0.376589	0.443042	0.372444	0.264753	0.236568	0.273863	0.29421	0.253132	0.0891285	-0.128157	-0.352898	-0.481774	-0.463994	-0.364217	-0.275279	-0.186129	-0.0806445	0.066451	0.297421	0.545171
-0.202295	-0.15521	-0.168161	-0.207418	-0.29044	-0.357308	-0.42488	-0.385346	-0.284005	-0.185803	-0.12573	-0.131384	-0.19742	-0.379838	-0.617607	-0.823246	-0.923852	-0.929969	-0.831483	-0.666772	-0.487482	-0.287467	-0.0757292	0.175091	0.468453	0.683324	0.841588	0.928893	1.01005	1.08229	1.0815	0.979663	0.784206	0.477003	0.12294	-0.19784	-0.459609	-0.665593	-0.782569	-0.769915	-0.56087	-0.333497	-0.276974	-0.376741	-0.652869	-0.889424	-0.932354	-0.698256	-0.361767	-0.0459923
-0.703499	-0.639409	-0.488937	-0.339273	-0.220393	-0.152175	-0.157913	-0.224931	-0.410061	-0.651365	-0.860061	-0.962163	-0.968372	-0.868421	-0.701261	-0.519306	-0.316317	-0.101431	0.153119	0.450843	0.668908	0.829524	0.918128	1.00049	1.07381	1.07301	0.969653	0.77129	0.45952	0.100192	-0.225357	-0.491018	-0.700065	-0.81878	-0.805938	-0.593785	-0.363031	-0.305668	-0.406918	-0.687152	-0.927224	-0.970792	-0.733213	-0.391721	-0.0712518	0.146333	0.318002	0.402237	0.323677	0.152893
0.340189	0.516243	0.634425	0.614174	0.468768	0.26722	0.0391884	-0.120009	-0.193524	-0.128296	0.0395684	0.270489	0.519837	0.665689	0.671535	0.483864	0.247824	0.0391112	0.0271873	0.159345	0.416177	0.653278	0.768539	0.795435	0.730088	0.674661	0.677648	0.778994	0.91232	1.02823	1.04901	0.970446	0.833727	0.658176	0.550603	0.480972	0.459721	0.43397	0.359332	0.227121	0.112058	0.090397	0.143969	0.214622	0.274222	0.248182	0.199671	0.17942	0.233639	0.328274
-0.545583	-0.393651	-0.213261	-0.0519306	0.0146595	-0.0586866	-0.252042	-0.452631	-0.575316	-0.549511	-0.43862	-0.321192	-0.238257	-0.212628	-0.14771	-0.108213	-0.0293624	0.0240288	0.0576005	0.11877	0.165533	0.224009	0.250286	0.234628	0.16023	0.0635877	-0.0336357	-0.106802	-0.257242	-0.46881	-0.760547	-1.03876	-1.23497	-1.28115	-1.21208	-1.05499	-0.833063	-0.646231	-0.568063	-0.627788	-0.787542	-1.00964	-1.24511	-1.41547	-1.48996	-1.4182	-1.27876	-1.0968	-0.90492	-0.747116
0.267509	0.235155	0.152317	-0.00424715	-0.228196	-0.435846	-0.555462	-0.530302	-0.422186	-0.307696	-0.226836	-0.201848	-0.138554	-0.100046	-0.023168	0.0288874	0.0616191	0.121258	0.166851	0.223864	0.249484	0.234217	0.161681	0.0674565	-0.0273343	-0.0986704	-0.245346	-0.451621	-0.736059	-1.00732	-1.19861	-1.24364	-1.17629	-1.02313	-0.80676	-0.624603	-0.54839	-0.606621	-0.762378	-0.97892	-1.2085	-1.3746	-1.44722	-1.37726	-1.2413	-1.0639	-0.876819	-0.722963	-0.601965	-0.537904
0.324501	0.286653	0.217757	0.219584	0.2588	0.333106	0.37689	0.35452	0.312205	0.281973	0.297017	0.390734	0.595489	0.79483	0.954628	1.02605	1.10213	1.25833	1.42516	1.63864	1.81493	1.87868	1.71591	1.43213	1.10535	0.834811	0.70273	0.691075	0.734916	0.663142	0.488655	0.255363	0.0352399	-0.170204	-0.329281	-0.44525	-0.490021	-0.442293	-0.330324	-0.225259	-0.112568	0.0472629	0.214869	0.32676	0.330527	0.280437	0.16562	0.0407045	-0.0603584	-0.0689317
1.38399	1.51602	1.64096	1.8234	1.97946	2.03314	1.86341	1.56748	1.22671	0.944588	0.806853	0.794699	0.840417	0.765571	0.583614	0.340335	0.110789	-0.10345	-0.269337	-0.39027	-0.436957	-0.387186	-0.270424	-0.160861	-0.0433463	0.123327	0.298108	0.414789	0.418717	0.366483	0.24675	0.116487	0.0110982	0.0021579	0.095448	0.119694	0.0572234	-0.102292	-0.339058	-0.522673	-0.597179	-0.552454	-0.390564	-0.161681	0.10101	0.385344	0.679619	0.9986	1.26859	1.4412
1.80994	1.91443	1.91774	1.72532	1.4359	1.11378	0.84309	0.710938	0.699276	0.743141	0.671328	0.496745	0.263327	0.0430838	-0.162472	-0.321636	-0.437668	-0.482463	-0.434709	-0.322679	-0.217557	-0.104805	0.0551133	0.222811	0.334763	0.338532	0.288415	0.173534	0.0485513	-0.0525666	-0.0611446	0.0283646	0.0516278	-0.00831085	-0.161361	-0.388532	-0.564705	-0.636191	-0.593279	-0.43795	-0.218343	0.0337011	0.306511	0.58886	0.894913	1.15397	1.31957	1.3369	1.20867	0.944509
0.138352	0.0320606	-0.0215262	-0.0662547	-0.020744	0.0995127	0.299941	0.452576	0.533153	0.511909	0.402179	0.211531	0.0770205	0.0473377	0.12858	0.240402	0.378475	0.554298	0.778931	1.02744	1.24844	1.45092	1.54474	1.53852	1.44433	1.28501	1.12981	1.04711	1.06512	1.15221	1.2268	1.24546	1.13727	0.874259	0.543107	0.221294	0.0260447	0.0180307	0.192303	0.412943	0.51539	0.477473	0.383167	0.355866	0.41976	0.53235	0.60119	0.571455	0.402641	0.174484
1.13986	1.24286	1.35916	1.40756	1.38171	1.28913	1.13474	0.984346	0.904205	0.921659	1.00606	1.07833	1.09641	0.99158	0.736711	0.415818	0.103974	-0.0852271	-0.0929929	0.0758811	0.289686	0.388959	0.352217	0.260833	0.234377	0.296292	0.405394	0.472101	0.443288	0.279703	0.0586143	-0.07858	-0.127581	-0.0922226	0.0164167	0.151747	0.316937	0.397059	0.326516	0.100221	-0.145779	-0.318449	-0.359147	-0.352299	-0.257168	-0.115515	0.0512343	0.203216	0.299418	0.343819
0.0836775	-0.0977569	-0.275487	-0.371033	-0.336021	-0.155732	0.0552237	0.153173	0.116921	0.0267548	0.00065179	0.0617411	0.169389	0.235207	0.206778	0.0453731	-0.172768	-0.308134	-0.356482	-0.321595	-0.214403	-0.0808769	0.0821114	0.161165	0.0915626	-0.131716	-0.374437	-0.544805	-0.584961	-0.578205	-0.484341	-0.344576	-0.18005	-0.0300938	0.0648261	0.108635	0.106167	0.0796409	0.100821	0.223067	0.364783	0.489389	0.479322	0.355775	0.13988	-0.136316	-0.380709	-0.467702	-0.462281	-0.397321
0.419812	0.336518	0.249508	0.163881	0.0938079	0.0477457	0.0467503	0.109102	0.155576	0.194778	0.199432	0.171976	0.115946	0.121073	0.202238	0.340394	0.392727	0.328493	0.206941	0.120406	0.113793	0.134719	0.130775	0.0887628	0.0164599	-0.046459	-0.0133045	0.127823	0.333179	0.518915	0.693375	0.773864	0.715413	0.570297	0.424245	0.353108	0.385124	0.475575	0.581683	0.572449	0.423393	0.256372	0.133923	0.11681	0.177578	0.242078	0.386712	0.610175	0.900145	1.18617
0.673665	0.804366	0.834045	0.732413	0.557562	0.386223	0.302979	0.340444	0.446289	0.570456	0.559651	0.385226	0.189779	0.0464913	0.026466	0.0975756	0.173053	0.342303	0.603796	0.943117	1.27782	1.51837	1.49578	1.2732	0.908171	0.527005	0.163235	-0.0436307	-0.0866407	0.0336978	0.327109	0.701258	0.999754	1.14521	1.07219	0.807739	0.4986	0.223726	0.0922152	0.0444672	0.0664696	0.106596	0.216976	0.353575	0.414326	0.305001	0.0382843	-0.195165	-0.430232	-0.556183
0.364363	0.264858	0.196459	0.187787	0.263618	0.382918	0.505164	0.494526	0.322799	0.130376	-0.0106956	-0.0304112	0.0395985	0.113909	0.28054	0.537989	0.872061	1.20158	1.43841	1.41617	1.19704	0.837656	0.462386	0.104242	-0.0994236	-0.141768	-0.0232912	0.265582	0.633943	0.927822	1.07103	0.99914	0.738777	0.43442	0.163798	0.034321	-0.0126884	0.00897363	0.0484789	0.157152	0.291638	0.35145	0.243816	-0.0187757	-0.248614	-0.480045	-0.604048	-0.570997	-0.500351	-0.481756
-1.24028	-1.03052	-0.840344	-0.67036	-0.578205	-0.55943	-0.589766	-0.613619	-0.54622	-0.412196	-0.231362	-0.100837	-0.0543349	-0.0765408	-0.0121547	0.168634	0.41175	0.5823	0.543952	0.299695	-0.0438298	-0.33938	-0.548524	-0.561921	-0.501414	-0.351197	-0.189879	0.0132654	0.238443	0.4376	0.546071	0.481986	0.302284	0.0950954	-0.0329592	-0.0429756	-0.005063	-0.0149189	-0.113109	-0.315494	-0.552324	-0.790614	-0.981057	-1.12745	-1.20012	-1.24098	-1.19753	-1.08113	-0.908409	-0.630563
-1.0327	-1.09168	-1.11278	-1.12813	-1.07571	-0.954219	-0.776486	-0.490571	-0.17742	0.133723	0.328252	0.443543	0.453519	0.475446	0.533765	0.651278	0.840819	0.971365	0.983905	0.881442	0.727942	0.591923	0.442424	0.26203	0.066669	-0.0955942	-0.20985	-0.268406	-0.342077	-0.499234	-0.750308	-0.991811	-1.02819	-0.861478	-0.580772	-0.308254	-0.11596	-0.0163159	0.0848225	0.271772	0.443318	0.593692	0.699912	0.764	0.823924	0.89733	0.966663	1.04656	1.07952	1.02716
1.19591	1.15088	1.0263	0.865571	0.657931	0.460262	0.312225	0.228226	0.2898	0.457421	0.651363	0.78273	0.844726	0.858107	0.868667	0.859216	0.802081	0.673864	0.494158	0.296664	0.156749	0.0892046	0.0973974	0.121139	0.159516	0.216623	0.240583	0.285781	0.344205	0.347077	0.221263	-0.0030273	-0.249617	-0.401242	-0.363253	-0.158015	0.07992	0.285725	0.439445	0.552526	0.606837	0.615953	0.529153	0.397695	0.204914	0.0298801	-0.0820205	-0.152718	-0.210798	-0.256444
0.0550305	-0.0323483	-0.0696798	-0.0418883	0.0818962	0.234151	0.28873	0.2508	0.186753	0.147686	0.114821	0.042561	-0.114507	-0.26745	-0.390843	-0.464586	-0.354404	-0.171958	0.0240677	0.219164	0.392007	0.546945	0.692864	0.857032	1.03281	1.14964	1.18345	1.12383	1.02994	0.984866	1.00472	1.0539	1.03003	0.901334	0.631659	0.26576	-0.0849538	-0.318407	-0.39312	-0.395951	-0.351739	-0.295476	-0.14432	0.0925421	0.39034	0.682197	0.953373	1.17273	1.32475	1.32992
0.490732	0.60139	0.711248	0.798596	0.788935	0.671967	0.417353	0.0718894	-0.259237	-0.479651	-0.550191	-0.552865	-0.511122	-0.458001	-0.315287	-0.0916539	0.189512	0.465068	0.721099	0.928208	1.07174	1.07661	1.004	0.818213	0.622338	0.451737	0.38799	0.389259	0.414949	0.433927	0.410983	0.36083	0.287424	0.253667	0.235059	0.197617	0.0974035	-0.0681813	-0.325631	-0.584901	-0.704481	-0.622495	-0.44738	-0.246411	-0.143878	-0.147767	-0.194048	-0.247342	-0.207678	-0.141221
-0.855295	-0.754526	-0.638251	-0.523239	-0.415743	-0.320736	-0.226862	-0.117403	0.0369838	0.224282	0.428126	0.586733	0.708295	0.743077	0.673092	0.551165	0.431608	0.330407	0.311843	0.337042	0.37579	0.379737	0.267884	0.11812	-0.0116942	-0.0896015	-0.0904198	-0.0271131	0.141293	0.387457	0.630223	0.838835	0.928277	0.818325	0.569089	0.248549	-0.0375126	-0.223295	-0.296611	-0.266403	-0.24311	-0.307053	-0.451487	-0.654194	-0.853273	-1.03083	-1.11247	-1.09304	-1.03753	-0.926442
-0.0618211	-0.0986909	-0.0963374	-0.0416708	0.0885203	0.258237	0.457946	0.613335	0.732432	0.766508	0.697943	0.57849	0.461357	0.362209	0.344022	0.368709	0.406671	0.410539	0.300954	0.154228	0.0270467	-0.0492805	-0.0500822	0.0119405	0.176931	0.418102	0.655944	0.860324	0.947952	0.84023	0.596049	0.282011	0.00175194	-0.180263	-0.252092	-0.222496	-0.199675	-0.262321	-0.403825	-0.602421	-0.797463	-0.971417	-1.0514	-1.03237	-0.977984	-0.869147	-0.766251	-0.718228	-0.690099	-0.663911
0.633692	0.521997	0.502484	0.517641	0.551389	0.546555	0.42492	0.262059	0.120892	0.036172	0.0352821	0.104125	0.287259	0.55495	0.818947	1.0458	1.14307	1.0235	0.752466	0.403894	0.0928162	-0.109214	-0.188941	-0.156091	-0.130761	-0.200296	-0.357361	-0.577796	-0.794284	-0.987368	-1.07615	-1.05502	-0.994658	-0.873851	-0.759641	-0.706337	-0.675114	-0.646047	-0.561771	-0.503652	-0.522828	-0.634587	-0.873475	-1.09707	-1.23556	-1.24631	-1.11768	-0.948085	-0.813556	-0.759444
0.93962	0.858978	0.725879	0.577028	0.401313	0.211516	-0.0138466	-0.2114	-0.369078	-0.458496	-0.524275	-0.587774	-0.611599	-0.558322	-0.364291	0.0270791	0.477842	0.931807	1.25316	1.32518	1.20706	1.04545	0.926239	0.858817	0.815598	0.673822	0.524353	0.378259	0.358405	0.493726	0.700222	0.867515	0.85539	0.627856	0.193764	-0.288271	-0.685651	-0.867917	-0.847658	-0.742386	-0.625086	-0.559776	-0.586662	-0.657521	-0.681523	-0.575516	-0.373676	-0.115349	0.0600948	0.115594
0.7767	1.05324	1.34557	1.55107	1.56607	1.4231	1.25532	1.13156	1.06156	1.0167	0.86951	0.714337	0.562667	0.542055	0.682541	0.896917	1.07059	1.05801	0.821789	0.371132	-0.129298	-0.541842	-0.731063	-0.710032	-0.600742	-0.478966	-0.411164	-0.439076	-0.512639	-0.537557	-0.427504	-0.217962	0.0502225	0.232362	0.289979	0.251973	0.151559	0.0402794	-0.0245584	-0.0081248	0.0578637	0.155949	0.280807	0.435707	0.550945	0.60447	0.58824	0.426309	0.172498	-0.10374
-0.53432	-0.302021	-0.132431	-0.00390636	0.0895686	0.194237	0.346898	0.473576	0.509598	0.397136	0.142928	-0.10357	-0.245362	-0.250573	-0.178851	-0.0957751	-0.0949474	-0.15586	-0.242641	-0.261034	-0.162775	-0.0545648	0.0889803	0.181489	0.22086	0.20975	0.175575	0.130942	0.0821098	0.0473808	0.0392595	0.0647122	0.0925413	0.132034	0.159232	0.199409	0.225498	0.239466	0.215918	0.176152	0.123173	0.0796261	0.0516078	0.0281225	-0.0313203	-0.163866	-0.389786	-0.584569	-0.732301	-0.767435
-0.0787034	-0.127799	-0.11289	-0.0586374	0.0495229	0.196907	0.339932	0.503232	0.678412	0.829233	0.984212	1.09549	1.16806	1.14068	1.00028	0.794228	0.596291	0.506367	0.506178	0.663858	0.839231	1.03181	1.22244	1.40528	1.40915	1.26002	1.03385	0.892457	0.914333	1.02824	1.1274	1.10023	0.995956	0.916976	0.906986	0.99637	1.16	1.33635	1.49468	1.56371	1.56907	1.48947	1.30048	1.00006	0.593051	0.184286	-0.106855	-0.199111	-0.16263	-0.0246181
0.206679	0.00397958	-0.161701	-0.311562	-0.426332	-0.434874	-0.401864	-0.337479	-0.265878	-0.149224	-0.0191497	0.0745794	0.0864345	0.0472467	0.0561956	0.0969737	0.191398	0.293216	0.306674	0.218167	0.0989475	-0.0490822	-0.0811283	-0.0228976	0.120143	0.209225	0.22875	0.122974	0.0480339	0.00375411	0.0501797	0.162231	0.323012	0.473622	0.507986	0.44471	0.260127	0.102349	-0.0462028	-0.150962	-0.349628	-0.51357	-0.666316	-0.735939	-0.72657	-0.668324	-0.576232	-0.45716	-0.394038	-0.387612
0.308974	0.307753	0.273129	0.216778	0.14723	0.139721	0.176606	0.262015	0.354112	0.366285	0.286228	0.178391	0.0444945	0.015508	0.0681791	0.197562	0.278139	0.295801	0.200124	0.132338	0.0922862	0.134279	0.235632	0.381062	0.517293	0.548376	0.491141	0.324181	0.181468	0.047099	-0.047658	-0.227357	-0.375646	-0.513808	-0.576784	-0.568309	-0.515625	-0.432325	-0.324622	-0.267526	-0.261714	-0.297631	-0.347175	-0.370628	-0.36851	-0.334744	-0.288244	-0.251948	-0.24014	-0.253426
0.17661	0.0248785	-0.133293	-0.334799	-0.521206	-0.627562	-0.664068	-0.633935	-0.639014	-0.742419	-0.912782	-1.13418	-1.3003	-1.32922	-1.18891	-0.845841	-0.373408	0.104145	0.3951	0.473858	0.447037	0.390002	0.361828	0.338511	0.374292	0.448635	0.514992	0.601335	0.631565	0.602796	0.484713	0.381568	0.346786	0.312185	0.196178	0.0589022	-0.0677219	-0.0962077	-0.0678653	0.0330418	0.116202	0.105532	0.0528511	-0.0426546	-0.119122	-0.167584	-0.220892	-0.262364	-0.268181	-0.25392
-0.144734	0.254825	0.610286	0.800326	0.827695	0.784135	0.726554	0.698111	0.674571	0.710694	0.785748	0.85274	0.939909	0.970428	0.941385	0.822172	0.71804	0.682925	0.647993	0.530876	0.392287	0.264451	0.235693	0.264306	0.366179	0.450135	0.439363	0.386178	0.289758	0.212559	0.163634	0.109816	0.0679468	0.0620742	0.076472	0.19981	0.424172	0.550282	0.537963	0.357113	0.111926	-0.0629169	-0.0902317	-0.0411598	0.0227877	0.0267458	-0.0260915	-0.128528	-0.236317	-0.263134
0.840183	0.775192	0.712395	0.719386	0.77603	0.832627	0.918623	0.948731	0.920078	0.80247	0.69974	0.665097	0.630636	0.515095	0.378371	0.252256	0.223885	0.252113	0.352614	0.43544	0.424814	0.372344	0.277222	0.201062	0.152795	0.099702	0.0583965	0.0526029	0.0668069	0.188484	0.409827	0.53424	0.522086	0.343671	0.101783	-0.0707058	-0.097653	-0.0492416	0.0138452	0.01775	-0.0343762	-0.135434	-0.241772	-0.268228	-0.189616	-0.0509273	0.105183	0.14175	0.0100831	-0.206391
-0.6484	-0.745889	-0.824696	-0.829906	-0.735176	-0.604681	-0.518409	-0.526603	-0.570794	-0.605569	-0.611454	-0.590893	-0.553716	-0.522387	-0.460108	-0.361805	-0.203458	0.0113364	0.237088	0.399316	0.523816	0.551417	0.448636	0.312189	0.176404	0.135989	0.166086	0.274652	0.419214	0.540168	0.509243	0.379256	0.20614	0.0662737	-0.000220973	0.0304148	0.142639	0.292383	0.394572	0.351096	0.19435	-0.0256857	-0.163655	-0.159045	-0.0742146	-0.0136101	-0.0845412	-0.214174	-0.298349	-0.29011
0.960888	1.01771	1.03586	0.929881	0.752475	0.545391	0.389566	0.315484	0.349615	0.474645	0.641475	0.755324	0.706887	0.532256	0.287113	0.133402	0.138537	0.233047	0.300567	0.221542	0.077118	-0.0166622	-0.0074833	0.0832996	0.224301	0.332401	0.433645	0.490782	0.449808	0.310022	0.150674	0.0740646	0.154306	0.379474	0.678221	0.906879	1.02569	1.11056	1.2829	1.47517	1.61581	1.70207	1.64475	1.47076	1.20752	0.890047	0.546097	0.270577	0.102687	0.123832
0.195214	-0.0366928	-0.220145	-0.395025	-0.532202	-0.647049	-0.744848	-0.770566	-0.74914	-0.735472	-0.7154	-0.631275	-0.498867	-0.339833	-0.198903	-0.14536	-0.154546	-0.189285	-0.230556	-0.235914	-0.158748	-0.052754	0.128451	0.320834	0.529044	0.715779	0.827554	0.810751	0.693297	0.595452	0.536903	0.571238	0.616468	0.627606	0.561643	0.440998	0.271006	0.0234213	-0.226707	-0.425434	-0.493564	-0.411344	-0.2557	-0.0963483	-0.0325301	-0.0169719	-0.0148561	-0.000332468	0.0479369	0.0995976
0.0143805	-0.0534007	-0.0953438	-0.129179	-0.130085	-0.0512214	0.0525939	0.230074	0.418502	0.62243	0.805327	0.914804	0.898346	0.783307	0.687474	0.630128	0.663757	0.708058	0.718967	0.654359	0.536195	0.369698	0.127203	-0.117783	-0.312424	-0.379154	-0.298624	-0.14618	0.00989586	0.072402	0.0876403	0.0897127	0.103938	0.151215	0.201813	0.23224	0.197234	0.0756921	-0.0922934	-0.231495	-0.283127	-0.266903	-0.233239	-0.255359	-0.25914	-0.24249	-0.188925	-0.151774	-0.21619	-0.347903
0.566649	0.480043	0.462998	0.469187	0.528375	0.586949	0.597378	0.535612	0.422643	0.263467	0.0316361	-0.202577	-0.38866	-0.452455	-0.375467	-0.229726	-0.0805129	-0.0207553	-0.00618706	-0.00420582	0.00939369	0.0545918	0.102965	0.132054	0.0985876	-0.0176099	-0.178209	-0.311289	-0.36065	-0.34514	-0.312956	-0.334104	-0.337718	-0.3218	-0.270591	-0.235074	-0.296657	-0.422579	-0.522592	-0.624973	-0.678768	-0.704674	-0.785035	-0.895028	-0.979388	-0.945513	-0.843587	-0.733911	-0.606989	-0.486039
0.276608	0.247317	0.210439	0.131476	0.00304127	-0.174426	-0.31156	-0.398596	-0.436133	-0.388309	-0.25241	-0.0300917	0.180278	0.29631	0.283845	0.232343	0.191929	0.230089	0.370868	0.596097	0.79371	0.886814	0.880045	0.797528	0.727329	0.624194	0.487364	0.432551	0.472626	0.586158	0.785277	0.905224	0.954208	0.969417	0.960768	1.01562	1.11954	1.21148	1.25333	1.20849	1.03861	0.672493	0.207183	-0.225279	-0.472002	-0.489217	-0.349492	-0.142172	0.0287287	0.146832
0.187932	0.206262	0.244547	0.334866	0.50613	0.750243	0.959463	1.05804	1.05087	0.963505	0.889183	0.77999	0.635123	0.577091	0.619519	0.73972	0.950535	1.07753	1.12939	1.14549	1.13633	1.19441	1.30443	1.40177	1.44608	1.39861	1.21875	0.831126	0.338484	-0.11938	-0.380595	-0.398821	-0.250889	-0.0313913	0.149548	0.274589	0.306077	0.320325	0.36438	0.520186	0.732365	0.914655	1.05631	0.999703	0.74209	0.382666	-0.0170765	-0.375123	-0.680228	-0.896689
0.375754	0.270664	0.157338	0.0668282	-0.0128702	-0.0681639	-0.129182	-0.187454	-0.276734	-0.310793	-0.252866	-0.122167	0.039616	0.201763	0.361604	0.482894	0.595201	0.615967	0.514692	0.392075	0.36531	0.416901	0.548714	0.638192	0.71073	0.744276	0.807576	0.911726	1.05181	1.19687	1.31919	1.35997	1.27617	1.11377	0.913141	0.757579	0.634707	0.51973	0.314534	0.080194	-0.0884456	-0.125183	-0.0321959	0.110792	0.212884	0.250056	0.193274	0.134023	0.142174	0.189587
0.904343	0.985906	0.960484	0.81048	0.661209	0.628013	0.688076	0.841537	0.94571	1.03016	1.06922	1.14291	1.26417	1.42726	1.59614	1.73854	1.78603	1.68846	1.4994	1.26581	1.0847	0.941652	0.807793	0.568899	0.296073	0.0997377	0.0569674	0.165225	0.331696	0.450554	0.493831	0.427724	0.358742	0.368232	0.423431	0.497522	0.522257	0.480107	0.440939	0.418435	0.364284	0.308695	0.226313	0.224142	0.283623	0.337936	0.343088	0.214872	0.0571578	-0.0434351
0.216175	0.241657	0.369623	0.517284	0.705182	0.820227	0.900847	0.938129	1.00848	1.12423	1.27993	1.44114	1.57709	1.62242	1.52928	1.34879	1.12581	0.952914	0.816354	0.688568	0.460513	0.200067	0.0126404	-0.0281893	0.0751565	0.234074	0.347539	0.388852	0.325745	0.259892	0.268952	0.321646	0.392376	0.415988	0.375751	0.33836	0.316877	0.265183	0.212117	0.133472	0.1314	0.188182	0.24003	0.244949	0.12255	-0.0280075	-0.124036	-0.0959145	0.0546725	0.281354
0.324341	0.368816	0.427584	0.467723	0.537825	0.644249	0.712103	0.711728	0.636604	0.513247	0.340365	0.158751	-0.0543796	-0.217304	-0.366703	-0.468814	-0.545684	-0.568965	-0.551923	-0.533864	-0.595756	-0.653307	-0.590917	-0.353542	0.017171	0.336613	0.44219	0.282687	-0.0241808	-0.346072	-0.552053	-0.661024	-0.666063	-0.563659	-0.418585	-0.257814	-0.13818	-0.101389	-0.106586	-0.085293	-0.0221136	0.0773045	0.141798	0.121889	-0.0426092	-0.342029	-0.690949	-0.898761	-0.846117	-0.575338
-0.588473	-0.433037	-0.228567	-0.0270144	0.138108	0.273276	0.375874	0.404991	0.317486	0.174069	0.0480697	-0.121169	-0.252018	-0.339889	-0.392887	-0.370709	-0.276425	-0.0772734	0.168235	0.411134	0.657623	0.898004	1.02537	0.978105	0.7208	0.36605	0.0780482	-0.0572492	0.00464821	0.222365	0.479194	0.755814	0.909159	0.942394	0.889827	0.809871	0.693288	0.554016	0.448973	0.464401	0.579981	0.70407	0.810128	0.799437	0.626627	0.408663	0.259159	0.198283	0.238682	0.334785
-0.0109129	0.055076	0.147703	0.237943	0.256143	0.193825	0.0826317	-0.0225669	-0.13892	-0.265908	-0.384192	-0.488508	-0.515	-0.386443	-0.153982	0.0749827	0.211106	0.158605	0.0293785	-0.0134229	0.134047	0.442123	0.781562	0.990963	1.00926	0.896969	0.775969	0.779193	0.874871	0.955624	1.03788	1.04888	0.91932	0.742014	0.584402	0.56676	0.654733	0.754117	0.774014	0.723997	0.603646	0.49465	0.442386	0.425397	0.447146	0.451967	0.43689	0.368596	0.296647	0.238221
-0.391742	-0.0039916	0.392752	0.743596	0.946385	0.950572	0.831916	0.704057	0.707463	0.808565	0.893896	0.980817	0.992442	0.855534	0.668177	0.50163	0.482988	0.575948	0.680966	0.701991	0.649139	0.521965	0.40679	0.351563	0.333612	0.356594	0.361688	0.345756	0.273591	0.197563	0.135825	0.192671	0.288417	0.375737	0.330489	0.240241	0.148689	0.192682	0.342519	0.551197	0.691436	0.712227	0.639624	0.493854	0.359441	0.259659	0.268985	0.350376	0.45567	0.556177
-0.0878992	-0.119736	-0.150645	-0.203989	-0.181065	-0.144347	-0.109444	-0.0438437	0.050591	0.170626	0.250827	0.285119	0.242328	0.171041	0.129974	0.244249	0.425735	0.596604	0.733421	0.809753	0.79491	0.658147	0.447557	0.122371	-0.185856	-0.335057	-0.254484	-0.0309826	0.266915	0.454389	0.508939	0.40728	0.235711	0.140908	0.0614194	0.00331839	-0.0560082	-0.143897	-0.273726	-0.382218	-0.510711	-0.587498	-0.653865	-0.669908	-0.642994	-0.559606	-0.521264	-0.546395	-0.638081	-0.726159
-0.771322	-0.64522	-0.481601	-0.305544	-0.179918	-0.139059	-0.151495	-0.172002	-0.112349	0.0436167	0.272589	0.490957	0.620939	0.644788	0.594735	0.554261	0.594337	0.764478	1.02278	1.29102	1.48733	1.50673	1.39805	1.24538	1.12583	1.08185	1.05613	0.975078	0.857207	0.722003	0.613087	0.545601	0.501275	0.44386	0.372907	0.287159	0.183672	0.0669883	-0.0326929	-0.0388158	0.0342447	0.132653	0.178568	0.143795	0.0716133	0.00796519	0.0227491	0.107175	0.236546	0.383773
0.64911	0.724207	0.796411	0.821396	0.761409	0.65109	0.521075	0.416339	0.351443	0.308818	0.253606	0.185376	0.102919	0.00340362	-0.108802	-0.204657	-0.210545	-0.140289	-0.0456567	-0.00150466	-0.0349425	-0.104354	-0.16556	-0.151343	-0.0701572	0.0542485	0.195826	0.330687	0.40087	0.418426	0.421877	0.386193	0.371415	0.31358	0.290555	0.258666	0.27855	0.360321	0.473983	0.576978	0.556571	0.444493	0.276638	0.124987	-0.00373132	-0.116122	-0.230025	-0.308101	-0.401933	-0.441311
-0.803564	-0.685606	-0.500351	-0.294074	-0.162811	-0.0933811	-0.161647	-0.32324	-0.465893	-0.469642	-0.411346	-0.219797	0.024424	0.273965	0.461926	0.484648	0.34295	0.133646	-0.0765323	-0.277562	-0.404589	-0.426226	-0.30245	-0.0568121	0.26083	0.608296	0.892837	1.08206	1.20445	1.24056	1.20191	1.13586	1.07055	1.07999	1.06727	1.03634	0.908557	0.683025	0.402269	0.123283	-0.113665	-0.312204	-0.409228	-0.331751	-0.148743	0.0470261	0.203872	0.298396	0.308831	0.203552
1.10302	1.13166	1.17373	1.17603	1.13556	1.07906	1.02156	1.02987	1.01868	0.991442	0.87894	0.680378	0.433196	0.187572	-0.0210399	-0.195837	-0.281258	-0.213046	-0.0519236	0.120435	0.258524	0.341745	0.350932	0.258243	0.0675538	-0.1279	-0.306617	-0.397594	-0.392164	-0.241511	0.0203453	0.322537	0.540308	0.573233	0.471674	0.217512	-0.0298699	-0.233267	-0.370858	-0.466716	-0.541812	-0.561376	-0.511002	-0.386453	-0.238117	-0.144279	-0.175346	-0.294143	-0.361593	-0.349509
0.49273	0.59315	0.660353	0.681332	0.690361	0.679069	0.71199	0.730633	0.737384	0.666899	0.550551	0.40022	0.22941	0.050252	-0.133735	-0.313802	-0.415622	-0.40526	-0.304879	-0.180366	-0.0827191	0.0304251	0.182311	0.34921	0.48965	0.596466	0.702666	0.879264	1.08513	1.25158	1.27809	1.13144	0.91232	0.701731	0.641254	0.670572	0.71815	0.632572	0.451621	0.22771	0.0770735	0.00793405	-0.00392855	0.0237113	0.0356109	0.00597881	-0.0457402	-0.0427487	0.0804773	0.250912
0.0992104	0.0154475	-0.0901343	-0.237299	-0.449163	-0.715045	-0.991846	-1.179	-1.24616	-1.24524	-1.25136	-1.29199	-1.35168	-1.43174	-1.55704	-1.70901	-1.78267	-1.82871	-1.74981	-1.55378	-1.24862	-0.892469	-0.557197	-0.38245	-0.240905	-0.163062	-0.104907	-0.0135947	-0.0212647	-0.0781262	-0.188507	-0.320206	-0.43305	-0.46952	-0.482476	-0.403707	-0.363365	-0.362931	-0.469326	-0.670585	-0.880294	-1.04766	-1.12101	-1.0661	-0.907189	-0.768839	-0.683363	-0.690147	-0.758612	-0.88336
0.142357	0.0267318	-0.0233679	-0.0397075	0.0135064	0.0415151	0.041871	-0.045433	-0.210581	-0.382662	-0.52	-0.580187	-0.535127	-0.404731	-0.291205	-0.221066	-0.226633	-0.282813	-0.385178	-0.455539	-0.460282	-0.396612	-0.33611	-0.290193	-0.278245	-0.322377	-0.391885	-0.473003	-0.505912	-0.53163	-0.545612	-0.525101	-0.46428	-0.394262	-0.352086	-0.412916	-0.4936	-0.568759	-0.633076	-0.702719	-0.807832	-0.961382	-1.10516	-1.19097	-1.16404	-1.00227	-0.779909	-0.51966	-0.277582	-0.157014
-0.0771971	-0.120534	-0.11323	0.0183596	0.259457	0.597118	0.89719	1.08708	1.14888	1.10577	0.993954	0.85114	0.760373	0.690511	0.668447	0.677407	0.721889	0.77489	0.801283	0.836144	0.975899	1.08575	1.24839	1.35885	1.36777	1.26186	1.10019	0.905157	0.757858	0.633215	0.527408	0.44854	0.391882	0.377784	0.445507	0.555205	0.60351	0.538208	0.457386	0.378653	0.351446	0.352772	0.320999	0.315643	0.268184	0.255591	0.209121	0.166656	0.109546	0.0887105
0.692269	0.474135	0.311284	0.178319	0.0781439	-0.00641089	-0.0559691	-0.0683008	-0.00906327	0.0868888	0.129141	0.0720217	0.0013269	-0.0675401	-0.0913386	-0.0901788	-0.11797	-0.122655	-0.164167	-0.175182	-0.215829	-0.252973	-0.302927	-0.321152	-0.312878	-0.227243	-0.105374	0.00280688	0.0818727	0.154913	0.219668	0.270035	0.277745	0.226534	0.104972	-0.03677	-0.111469	-0.0482804	0.176745	0.481864	0.768659	0.935403	0.942034	0.843592	0.71915	0.650333	0.640204	0.689731	0.722307	0.749505
0.152568	0.043249	-0.0937564	-0.251054	-0.374805	-0.395314	-0.311963	-0.214213	-0.171453	-0.164401	-0.166668	-0.226934	-0.377517	-0.51562	-0.572223	-0.534218	-0.425947	-0.318215	-0.239033	-0.246353	-0.33062	-0.47679	-0.662918	-0.870287	-1.10906	-1.2302	-1.18589	-1.00923	-0.743091	-0.475925	-0.364267	-0.516919	-0.845224	-1.27435	-1.67825	-1.97341	-2.0109	-1.87008	-1.61655	-1.34325	-1.09303	-1.01049	-1.07657	-1.17244	-1.2101	-1.16257	-1.08357	-0.972758	-0.889401	-0.8537
0.315408	0.458288	0.488927	0.389989	0.207358	0.0144799	-0.169141	-0.305847	-0.341657	-0.324998	-0.194147	-0.0659645	0.085621	0.164278	0.203527	0.263641	0.304147	0.299358	0.176119	-0.0144602	-0.17525	-0.251307	-0.212182	-0.147447	-0.180195	-0.329257	-0.541934	-0.645768	-0.562959	-0.295902	1.40412e-05	0.206499	0.181705	0.00589582	-0.240973	-0.471548	-0.565936	-0.569053	-0.501858	-0.37929	-0.163954	0.128101	0.451917	0.7853	1.0147	1.0858	0.952431	0.709912	0.404915	0.215252
0.910248	0.923471	0.898477	0.825692	0.746548	0.671686	0.631214	0.640704	0.682906	0.713579	0.670988	0.595261	0.514081	0.521811	0.575905	0.659525	0.686104	0.606283	0.426679	0.209516	0.00066094	-0.175077	-0.242374	-0.247648	-0.168256	-0.0438766	0.0375828	0.0858271	0.107433	0.178136	0.273696	0.363691	0.402913	0.448693	0.442404	0.451297	0.487351	0.505534	0.507466	0.51847	0.579883	0.673544	0.715946	0.672884	0.566768	0.441188	0.369059	0.386941	0.391131	0.33504
-0.380475	-0.212213	-0.00399276	0.142686	0.198997	0.150728	0.0364304	0.044175	0.132449	0.298491	0.508952	0.733791	0.967887	1.11937	1.1653	1.20261	1.15678	1.09404	1.01352	0.923238	0.763907	0.589611	0.460521	0.402959	0.476326	0.643325	0.879027	1.06123	1.1142	1.05804	0.934504	0.767791	0.62211	0.444852	0.223529	-0.0208035	-0.292182	-0.440552	-0.488345	-0.5224	-0.604731	-0.747715	-0.856162	-0.913954	-0.874181	-0.765173	-0.658863	-0.559704	-0.579297	-0.674248
0.162452	0.0363717	-0.0186851	-0.0393488	-0.0360784	-0.0615062	-0.123128	-0.189732	-0.269809	-0.325801	-0.399745	-0.522878	-0.648997	-0.683638	-0.676998	-0.600758	-0.482222	-0.291207	-0.00712047	0.235446	0.425348	0.487316	0.449643	0.354499	0.311485	0.389538	0.512841	0.579303	0.545993	0.437101	0.255066	0.0863285	-0.0889925	-0.279898	-0.460056	-0.503444	-0.448841	-0.365617	-0.312173	-0.32873	-0.378745	-0.425146	-0.418516	-0.276175	-0.0806007	0.0212613	-0.0361591	-0.190255	-0.345348	-0.411848
0.634801	0.482046	0.349467	0.298845	0.386179	0.513473	0.58323	0.548268	0.43398	0.242923	0.0658232	-0.118187	-0.318553	-0.50764	-0.553179	-0.495869	-0.408521	-0.352428	-0.369806	-0.4223	-0.471	-0.464042	-0.314646	-0.109379	-0.00246883	-0.062735	-0.224468	-0.387248	-0.457043	-0.422903	-0.334058	-0.204345	-0.129673	-0.0617058	0.0334964	0.186679	0.365653	0.513126	0.52395	0.393479	0.180418	-0.0858793	-0.247817	-0.224157	-0.0845986	0.0787591	0.160539	0.127737	-0.0243729	-0.199447
0.658724	0.732606	0.71632	0.624948	0.472933	0.264625	0.076757	-0.118442	-0.330991	-0.531576	-0.579883	-0.519088	-0.42643	-0.366926	-0.38536	-0.441046	-0.492708	-0.485326	-0.326846	-0.109098	0.00431254	-0.0596181	-0.231185	-0.403863	-0.477902	-0.441686	-0.347438	-0.209839	-0.130626	-0.0585263	0.0424646	0.204962	0.394818	0.551258	0.56274	0.424336	0.19832	-0.0841697	-0.255954	-0.230855	-0.0828111	0.0904795	0.177232	0.142436	-0.0189234	-0.204643	-0.431907	-0.616817	-0.732613	-0.824763
-0.774063	-0.770573	-0.709534	-0.592126	-0.515207	-0.439404	-0.422833	-0.369695	-0.256314	-0.086057	0.050715	0.139599	0.248556	0.411199	0.609595	0.714376	0.693659	0.5674	0.421408	0.353035	0.448451	0.550764	0.570438	0.405364	0.0242667	-0.391287	-0.601724	-0.505181	-0.190066	0.133674	0.32562	0.285343	-0.00134417	-0.373905	-0.670226	-0.809304	-0.752956	-0.593238	-0.464566	-0.464849	-0.503595	-0.4859	-0.413937	-0.35227	-0.376094	-0.461573	-0.524424	-0.531916	-0.461258	-0.350293
0.245309	0.0195772	-0.163719	-0.276799	-0.280491	-0.24742	-0.264386	-0.28302	-0.269941	-0.189724	-0.0254037	0.157507	0.319246	0.412638	0.399615	0.315602	0.126699	-0.0585655	-0.198425	-0.14536	0.0642882	0.299267	0.493098	0.575573	0.558965	0.459358	0.310531	0.14441	-0.0488048	-0.241549	-0.399753	-0.511324	-0.613506	-0.645164	-0.600351	-0.463506	-0.248278	0.0256964	0.23547	0.313631	0.21948	0.0566158	-0.0908893	-0.13275	-0.0920615	0.0086101	0.104772	0.138997	0.0810816	-0.0676671
0.278615	0.235126	0.236428	0.242045	0.297626	0.367283	0.436342	0.518462	0.570308	0.593617	0.603992	0.620117	0.585747	0.56805	0.583141	0.659482	0.778154	0.931341	1.11372	1.32665	1.41983	1.26616	0.866026	0.317746	-0.176677	-0.482488	-0.558951	-0.371829	-0.0331112	0.395978	0.792571	1.0457	1.11937	0.998896	0.726437	0.425749	0.27355	0.304748	0.442891	0.455647	0.318552	0.023739	-0.292709	-0.52715	-0.64673	-0.702522	-0.735219	-0.790907	-0.936674	-0.990547
-0.255525	-0.158772	-0.0678619	0.0226136	0.124582	0.186815	0.23686	0.245701	0.267642	0.301557	0.344236	0.424103	0.554225	0.7246	0.887272	1.00374	1.05153	1.05782	1.03783	0.993495	0.91412	0.834565	0.756431	0.722989	0.72806	0.754085	0.788028	0.832336	0.885938	0.938631	0.983182	1.03291	1.05234	0.977124	0.834266	0.569579	0.263594	-0.00258898	-0.105118	-0.0660442	0.102243	0.29377	0.43562	0.513579	0.581249	0.621464	0.613331	0.571542	0.502823	0.490135
0.953859	0.891841	0.800715	0.72034	0.641745	0.608619	0.613744	0.640045	0.674348	0.719125	0.773295	0.826547	0.871571	0.921827	0.941459	0.865448	0.721076	0.453583	0.144354	-0.124651	-0.228267	-0.188779	-0.0187072	0.17485	0.318203	0.396989	0.465377	0.506018	0.497798	0.455566	0.386119	0.373297	0.368375	0.39273	0.422158	0.468083	0.510357	0.576185	0.627662	0.665971	0.664857	0.682187	0.605009	0.468083	0.27822	0.0846281	-0.0471881	-0.111492	-0.0801184	-0.058022
-0.238495	-0.454912	-0.612742	-0.684157	-0.696783	-0.635041	-0.516949	-0.347999	-0.148917	0.0354188	0.199407	0.278442	0.266705	0.179016	0.113244	0.061026	0.0566279	0.070392	0.110272	0.125256	0.112916	0.0905429	0.0322465	0.0325044	0.127058	0.351863	0.634912	0.90985	1.13111	1.24833	1.20505	1.03933	0.820537	0.627862	0.446339	0.265581	0.121733	0.0687763	0.093413	0.21947	0.374983	0.423157	0.338216	0.160295	-0.0522715	-0.211908	-0.239433	-0.164083	-0.00390361	0.0542138
-0.338021	-0.288332	-0.214127	-0.138152	0.0095261	0.163047	0.294411	0.272574	0.162494	0.0503373	-0.0368313	0.00452601	0.0744324	0.114674	0.0830272	0.0118775	-0.0438608	-0.0724398	-0.091676	-0.153877	-0.224662	-0.268021	-0.222254	-0.10256	0.0175889	0.0588785	-0.0083479	-0.147696	-0.322049	-0.453307	-0.459599	-0.419159	-0.393571	-0.373923	-0.39199	-0.383792	-0.322939	-0.281508	-0.29102	-0.373461	-0.512693	-0.685909	-0.836836	-0.886497	-0.804849	-0.635234	-0.424456	-0.286241	-0.240755	-0.31126
-0.515663	-0.339525	-0.15945	-0.0213912	0.00964555	-0.108603	-0.363438	-0.629337	-0.804767	-0.783206	-0.638289	-0.418921	-0.344344	-0.387743	-0.495695	-0.57854	-0.525279	-0.355478	-0.0749775	0.192077	0.38454	0.421232	0.357044	0.221615	0.117859	0.0891342	0.102831	0.1325	0.178547	0.233378	0.22992	0.160196	0.0417433	-0.0560404	-0.0821502	0.00512397	0.190383	0.421833	0.646926	0.763195	0.704149	0.441487	0.0334673	-0.369951	-0.589281	-0.633198	-0.581648	-0.555915	-0.602248	-0.658729
0.763875	0.775169	0.704942	0.582743	0.431793	0.322711	0.292728	0.307026	0.337994	0.386059	0.443292	0.439683	0.366903	0.243261	0.141193	0.113939	0.205037	0.398413	0.640004	0.87496	0.996323	0.934689	0.660519	0.234622	-0.186471	-0.415412	-0.461253	-0.407444	-0.380584	-0.428946	-0.487902	-0.513266	-0.449229	-0.325612	-0.186905	-0.112069	-0.0314552	0.0528794	0.192338	0.323547	0.348805	0.289741	0.192068	0.119173	0.0470297	-0.0399269	-0.126615	-0.174185	-0.177501	-0.0616963
0.03704	0.0919776	0.137574	0.172207	0.191567	0.269131	0.336368	0.338882	0.291189	0.225444	0.201853	0.116903	-0.0173169	-0.152906	-0.194424	-0.152182	0.045192	0.339721	0.675834	0.964884	1.17568	1.33708	1.37136	1.39098	1.3858	1.25941	1.05619	0.72146	0.379269	0.130807	0.0574886	0.176694	0.404772	0.660577	0.901905	1.04505	1.10772	1.08747	1.01539	0.904909	0.772634	0.503238	0.147577	-0.240917	-0.524429	-0.544997	-0.38046	-0.169012	-0.0968755	-0.200375
0.562358	0.738777	0.939736	1.12534	1.28761	1.42278	1.45654	1.47586	1.47075	1.3463	1.14619	0.816585	0.479633	0.234976	0.162779	0.280159	0.504746	0.756634	0.994268	1.13522	1.19693	1.17699	1.10601	0.997226	0.866976	0.601705	0.251489	-0.131058	-0.410229	-0.430483	-0.268464	-0.0602538	0.0107786	-0.0911361	-0.230993	-0.277898	-0.159315	0.0658411	0.264285	0.329524	0.209482	-0.0413921	-0.246329	-0.230379	0.0183665	0.405903	0.730536	0.863338	0.83167	0.599823
-0.36132	-0.208319	-0.0795149	-0.00421406	-0.109822	-0.400922	-0.768195	-1.10141	-1.27741	-1.25808	-1.05946	-0.808772	-0.591608	-0.471207	-0.392969	-0.343136	-0.251952	-0.0798891	0.113888	0.237576	0.25048	0.148959	0.00969578	-0.0582641	-0.0333993	0.069903	0.088964	0.0308525	-0.0814654	-0.185121	-0.263287	-0.278177	-0.266723	-0.234363	-0.20258	-0.177064	-0.133522	-0.05235	0.0668093	0.114024	0.0429961	-0.114774	-0.295929	-0.41848	-0.483523	-0.537182	-0.661409	-0.925771	-1.18179	-1.32866
0.533352	0.338171	0.185264	0.12963	0.1694	0.279913	0.299904	0.238958	0.121161	0.0124497	-0.069529	-0.0851459	-0.0731327	-0.0391939	-0.00586082	0.0208994	0.0665656	0.151697	0.276669	0.326186	0.251694	0.0862284	-0.103764	-0.232292	-0.300507	-0.356785	-0.487071	-0.764327	-1.03284	-1.18687	-1.18615	-0.982866	-0.670229	-0.368606	-0.171602	-0.074788	-0.0395793	0.0197681	0.172151	0.314701	0.364266	0.329776	0.193924	0.0359487	-0.136056	-0.237709	-0.316831	-0.291242	-0.141115	0.150126
-0.096084	-0.203504	-0.406219	-0.739353	-1.03417	-1.20308	-1.20232	-0.984797	-0.650275	-0.327539	-0.116743	-0.0131526	0.0245207	0.0880225	0.251073	0.403601	0.456636	0.419731	0.27437	0.105336	-0.0787099	-0.187479	-0.272139	-0.244759	-0.0841226	0.227505	0.562112	0.733992	0.669351	0.418269	0.149951	-0.0471593	-0.0587683	0.0444525	0.155415	0.196506	0.122784	-0.0659935	-0.336584	-0.620375	-0.784132	-0.80379	-0.713046	-0.572767	-0.436069	-0.293974	-0.131925	-0.0446643	-0.0222854	-0.109957
0.115424	0.133708	0.158086	0.223112	0.39229	0.541485	0.59206	0.556867	0.418247	0.257051	0.0815405	-0.0221841	-0.102919	-0.0768081	0.0763788	0.373555	0.692645	0.856554	0.794911	0.555472	0.299597	0.111628	0.100557	0.198991	0.304808	0.343994	0.27369	0.0936672	-0.164375	-0.435006	-0.591169	-0.609915	-0.52338	-0.389605	-0.259247	-0.123741	0.0307933	0.114007	0.135348	0.0517428	-0.0787067	-0.172065	-0.157054	-0.065156	0.0630721	0.185795	0.324633	0.475786	0.54903	0.57721
-0.121265	-0.253386	-0.344596	-0.357795	-0.292429	-0.22525	-0.215455	-0.238815	-0.322932	-0.428289	-0.561493	-0.610716	-0.520209	-0.318846	-0.111558	0.073505	0.162896	0.170784	0.144804	0.150054	0.219369	0.303659	0.390619	0.458309	0.529689	0.558535	0.585747	0.590891	0.60988	0.67081	0.715771	0.716501	0.614413	0.403252	0.110572	-0.192886	-0.439731	-0.591474	-0.654259	-0.617645	-0.51939	-0.383688	-0.256344	-0.060743	0.131485	0.332682	0.421686	0.293561	-0.0327654	-0.478357
0.725776	0.696192	0.689239	0.677827	0.689335	0.75138	0.798609	0.799376	0.692137	0.470321	0.162873	-0.155897	-0.415197	-0.574597	-0.64055	-0.602089	-0.498875	-0.356326	-0.222556	-0.0170861	0.184841	0.39619	0.489685	0.355095	0.0123032	-0.455772	-0.851476	-1.04866	-1.05852	-0.959003	-0.800024	-0.659671	-0.577903	-0.575694	-0.602144	-0.637007	-0.647726	-0.633639	-0.543232	-0.375985	-0.189874	-0.0294035	0.0278003	0.0117429	-0.103732	-0.241069	-0.374202	-0.465182	-0.505246	-0.480217
0.0294823	-0.139834	-0.260103	-0.319317	-0.325058	-0.320994	-0.26255	-0.112459	0.0951324	0.232185	0.365411	0.46677	0.499212	0.454986	0.329033	0.167822	-0.0662336	-0.292866	-0.44677	-0.518568	-0.478685	-0.310886	-0.00887326	0.345113	0.563243	0.580111	0.440669	0.285569	0.235468	0.26487	0.381007	0.513089	0.597357	0.677733	0.735103	0.724035	0.621733	0.448473	0.263219	0.114075	0.0390068	0.0336992	0.0880039	0.119954	0.140211	0.18533	0.249357	0.348201	0.461067	0.597655
-0.565137	-0.549443	-0.524162	-0.503742	-0.420935	-0.249408	0.0363176	0.371214	0.57758	0.593539	0.461616	0.314881	0.267481	0.295298	0.405172	0.530131	0.609855	0.685896	0.740172	0.729701	0.632916	0.469	0.293736	0.152635	0.0816155	0.0765941	0.12797	0.158197	0.177362	0.220048	0.280622	0.374135	0.480915	0.610137	0.697028	0.665294	0.473021	0.20453	-0.0244228	-0.19911	-0.274604	-0.392718	-0.559986	-0.697706	-0.72534	-0.611444	-0.373226	-0.119563	0.0727078	0.161056
-0.359058	-0.242912	-0.135205	0.0189192	0.139356	0.159817	0.0927427	-0.0115714	-0.0778881	-0.133061	-0.166589	-0.191715	-0.171475	-0.117671	-0.0535571	-0.0418412	-0.0852475	-0.163384	-0.205484	-0.131047	0.0681813	0.326069	0.536875	0.576405	0.493937	0.384608	0.378733	0.507646	0.717133	0.959729	1.0964	1.12685	1.00301	0.76975	0.450096	0.112708	-0.120024	-0.116611	0.0354009	0.257301	0.46715	0.561681	0.523337	0.37269	0.208935	0.136365	0.164839	0.188758	0.16214	0.0841155
0.61897	0.343993	0.0883047	-0.0735389	-0.235284	-0.377206	-0.584247	-0.739504	-0.904401	-1.07978	-1.21239	-1.31708	-1.33381	-1.19201	-0.931166	-0.609851	-0.363784	-0.277703	-0.376289	-0.554099	-0.700988	-0.721979	-0.636919	-0.5147	-0.373961	-0.16972	0.0345936	0.226372	0.370965	0.401462	0.326851	0.176987	0.125179	0.14523	0.232362	0.256671	0.290668	0.302794	0.388142	0.491842	0.575908	0.49918	0.19586	-0.259087	-0.752465	-1.07709	-1.18978	-1.09573	-0.920046	-0.757589
-0.306449	-0.252501	-0.149813	0.0182997	0.245575	0.454437	0.597979	0.617611	0.528351	0.432823	0.406543	0.525394	0.650886	0.730707	0.749895	0.6921	0.5812	0.464676	0.382443	0.357936	0.37489	0.437176	0.494828	0.546486	0.545117	0.497457	0.409594	0.380373	0.40086	0.46001	0.480514	0.46939	0.42846	0.394372	0.372884	0.37245	0.394354	0.524866	0.694453	0.862384	0.932113	0.839393	0.672113	0.471933	0.325375	0.267381	0.321972	0.448108	0.609968	0.745448
-0.305881	-0.342809	-0.396885	-0.452415	-0.4718	-0.498077	-0.416567	-0.276677	-0.133797	-0.0642437	-0.091856	-0.24982	-0.442002	-0.534076	-0.385582	0.014335	0.487629	0.950327	1.21524	1.30222	1.29692	1.22843	1.15288	0.971106	0.749095	0.45815	0.197072	0.0124657	-0.0300502	-0.0118513	-0.025738	-0.0351898	0.0268112	0.0921134	0.0981321	0.021712	-0.148948	-0.225011	-0.173522	0.0269517	0.390849	0.743107	0.916846	0.884706	0.63865	0.253051	-0.163097	-0.439531	-0.501419	-0.390628
0.68438	0.610203	0.499161	0.297099	0.0923698	-0.0558828	-0.0948444	-0.078167	-0.0908927	-0.0995544	-0.0427366	0.0171066	0.0226222	-0.0474095	-0.203802	-0.273507	-0.226322	-0.0426077	0.290868	0.613679	0.772893	0.743441	0.517954	0.16459	-0.216768	-0.470093	-0.526808	-0.425278	-0.31453	-0.304201	-0.423386	-0.625538	-0.808512	-0.943728	-1.03763	-1.04394	-0.945707	-0.707818	-0.415029	-0.147574	0.0187419	0.0503646	-0.0405301	-0.169015	-0.320062	-0.469987	-0.640022	-0.808902	-0.901164	-0.836664
-0.757093	-0.739379	-0.750823	-0.66147	-0.488854	-0.266966	-0.0774982	0.00574717	-0.0467536	-0.125378	-0.140408	-0.0256483	0.151189	0.26933	0.29322	0.252438	0.224629	0.276315	0.406073	0.63039	0.903282	1.19737	1.43115	1.53053	1.51577	1.38369	1.25159	1.15323	1.06654	1.01876	0.996096	0.977285	0.964319	0.96692	0.991734	1.0551	1.18343	1.3364	1.46055	1.47249	1.29735	1.00807	0.646388	0.328434	0.120431	0.00299035	-0.105518	-0.254483	-0.433982	-0.632901
-0.433985	-0.314023	-0.212503	-0.209884	-0.297451	-0.463855	-0.653157	-0.75346	-0.715629	-0.614614	-0.485237	-0.378333	-0.314797	-0.297071	-0.274137	-0.258239	-0.232837	-0.199671	-0.130663	-0.0684013	0.0083704	0.116188	0.228196	0.289335	0.271457	0.255351	0.255096	0.283375	0.322811	0.367557	0.400121	0.444345	0.464907	0.453295	0.373298	0.276571	0.243356	0.31651	0.536071	0.810082	0.988238	1.03034	0.942539	0.852143	0.769361	0.774839	0.832379	0.901149	0.921152	0.826266
-0.0753191	0.137918	0.387754	0.566025	0.684737	0.710041	0.680892	0.617308	0.599463	0.695014	0.854637	0.969453	0.927786	0.730545	0.427795	0.0733901	-0.16583	-0.323553	-0.382765	-0.342846	-0.235858	-0.187994	-0.264916	-0.419619	-0.583346	-0.676441	-0.693717	-0.605162	-0.472559	-0.344101	-0.212655	-0.102826	-0.0421182	-0.0328557	-0.0847676	-0.183431	-0.305465	-0.427246	-0.497827	-0.497855	-0.464431	-0.44511	-0.478345	-0.583846	-0.690333	-0.749454	-0.731046	-0.685597	-0.664458	-0.681158
0.608567	0.559608	0.438774	0.317415	0.154578	0.055857	0.0650566	0.155564	0.269189	0.386876	0.5017	0.616513	0.647606	0.627675	0.576895	0.49761	0.400355	0.348495	0.293918	0.240181	0.200077	0.18589	0.246682	0.37982	0.519568	0.581139	0.58483	0.497235	0.385847	0.248164	0.176385	0.179636	0.244909	0.380014	0.531717	0.672196	0.753935	0.810764	0.907501	1.08061	1.30074	1.47507	1.53582	1.48567	1.32378	1.12425	0.983703	0.838051	0.700011	0.629489
-0.0753273	-0.0689027	-0.0272677	0.0684369	0.200087	0.33213	0.455547	0.57596	0.696363	0.72897	0.708069	0.654817	0.571672	0.469682	0.415298	0.358064	0.30171	0.259654	0.244776	0.308528	0.448147	0.594699	0.659267	0.663137	0.571279	0.454468	0.310082	0.234808	0.238218	0.306669	0.44835	0.607439	0.754758	0.840476	0.900071	1.00152	1.18305	1.4139	1.59672	1.66042	1.60783	1.43806	1.22882	1.08143	0.928687	0.783926	0.709971	0.722094	0.825926	0.9345
0.0355118	0.0748574	0.0737108	-0.0339065	-0.141295	-0.312762	-0.460389	-0.586492	-0.669676	-0.700102	-0.623978	-0.509346	-0.362762	-0.161117	0.038059	0.315927	0.602414	0.879688	1.09766	1.17018	1.05228	0.859285	0.669072	0.531092	0.446331	0.406011	0.371693	0.415763	0.535824	0.736063	0.966025	1.1831	1.34379	1.38084	1.39393	1.29565	1.07301	0.739944	0.433323	0.191313	0.128562	0.196004	0.248425	0.289662	0.270538	0.203995	0.0727415	-0.122036	-0.329446	-0.464001
-0.247912	-0.0760085	0.0656673	0.164634	0.138284	0.0259553	-0.0882536	-0.130213	-0.111389	-0.0720966	-0.0898334	-0.110312	-0.0849783	0.0062601	0.160997	0.297245	0.424979	0.54109	0.705007	0.874466	0.937699	0.894432	0.742417	0.521334	0.305132	0.117674	-0.0345448	-0.0927702	-0.0849885	-0.00663506	0.124266	0.260654	0.338392	0.313562	0.166277	-0.0413648	-0.313636	-0.534794	-0.629586	-0.601969	-0.522554	-0.407756	-0.305896	-0.213009	-0.194948	-0.255121	-0.347972	-0.469187	-0.492531	-0.467833
0.100716	0.102738	0.0772927	0.0964701	0.166927	0.245217	0.321167	0.29697	0.118783	-0.100056	-0.274239	-0.26443	-0.0946412	0.193204	0.503835	0.720827	0.803172	0.80562	0.772148	0.686798	0.513389	0.277454	0.0255962	-0.14829	-0.223194	-0.207921	-0.11108	0.0264944	0.159681	0.240488	0.272895	0.227555	0.12974	0.0436576	0.00638181	0.0595614	0.186034	0.29827	0.387238	0.399296	0.343338	0.217116	-0.00799933	-0.33077	-0.612833	-0.775088	-0.75292	-0.605253	-0.397832	-0.19964
0.197719	0.296594	0.362552	0.416144	0.381005	0.185129	-0.0418496	-0.222511	-0.212338	-0.0362334	0.262318	0.584502	0.809565	0.894973	0.897512	0.862795	0.774271	0.594412	0.349701	0.0884761	-0.0918777	-0.169568	-0.153727	-0.0532837	0.0894077	0.227548	0.311361	0.344972	0.297946	0.196494	0.107209	0.068547	0.123705	0.254881	0.371291	0.463569	0.476076	0.418036	0.287119	0.053631	-0.281144	-0.573699	-0.741989	-0.718996	-0.565837	-0.350701	-0.145138	-0.0366719	-0.0166493	-0.104379
0.400745	0.504277	0.665174	0.862629	1.09702	1.26662	1.3344	1.31685	1.23829	1.13393	1.07854	1.01309	0.901367	0.76437	0.666619	0.636317	0.615511	0.539379	0.343606	0.0677971	-0.189512	-0.334377	-0.355972	-0.208376	-0.0105505	0.164288	0.232952	0.217707	0.121967	0.0137752	-0.0350408	0.0119579	0.142104	0.263015	0.375967	0.472888	0.566149	0.620123	0.672278	0.705356	0.668867	0.58624	0.527787	0.472278	0.354273	0.228165	0.139788	0.147108	0.214638	0.31147
1.34318	1.41727	1.42051	1.37857	1.29075	1.18892	1.13196	1.06467	0.949782	0.808912	0.708398	0.67724	0.655845	0.577561	0.376253	0.0926479	-0.171936	-0.320895	-0.343101	-0.191333	0.0120855	0.191867	0.262472	0.246796	0.148349	0.0370988	-0.0130972	0.0352301	0.169055	0.293385	0.409529	0.509191	0.605088	0.660588	0.714216	0.74823	0.710709	0.625747	0.565642	0.508564	0.387222	0.257549	0.166673	0.174201	0.24364	0.34321	0.461147	0.526029	0.447207	0.259683
-0.533989	-0.394567	-0.22719	-0.109148	-0.052514	-0.112763	-0.22768	-0.34947	-0.44393	-0.467435	-0.449638	-0.415798	-0.420622	-0.519463	-0.757712	-1.06612	-1.37557	-1.52939	-1.3993	-1.10806	-0.733579	-0.455797	-0.354836	-0.390123	-0.427171	-0.426965	-0.364874	-0.300141	-0.279468	-0.260786	-0.244217	-0.214233	-0.172066	-0.150034	-0.192587	-0.271541	-0.427405	-0.528195	-0.535973	-0.443592	-0.273181	-0.124225	-0.0784918	-0.166231	-0.32006	-0.493665	-0.61364	-0.683838	-0.798283	-0.942822
0.525867	0.648371	0.733434	0.746967	0.679567	0.571815	0.482855	0.495489	0.596031	0.67299	0.66778	0.624647	0.574787	0.615841	0.711658	0.81073	0.831746	0.788002	0.773112	0.833861	0.988352	1.16311	1.27274	1.27393	1.21363	1.10494	1.07095	1.08367	1.18606	1.30798	1.41642	1.41436	1.31964	1.11595	0.868416	0.683318	0.542469	0.432049	0.319026	0.238426	0.219271	0.265066	0.319104	0.394668	0.438731	0.425163	0.430532	0.433586	0.413978	0.313135
1.09057	0.889537	0.733587	0.676073	0.715084	0.856246	1.01994	1.12263	1.12375	1.06727	0.965453	0.933611	0.945534	1.04144	1.15564	1.25722	1.25529	1.16656	0.975769	0.743901	0.57052	0.438586	0.335155	0.229286	0.153788	0.135846	0.178742	0.22936	0.300141	0.341414	0.328706	0.333734	0.336595	0.318228	0.223768	0.124871	0.11417	0.19979	0.326122	0.455557	0.550112	0.610801	0.698906	0.800177	0.814701	0.76602	0.621179	0.474886	0.374217	0.285511
-0.475103	-0.208789	-0.00146868	0.168971	0.304039	0.36494	0.430909	0.506531	0.520636	0.510385	0.416872	0.318153	0.267322	0.210648	0.166631	0.118441	0.0943517	0.000831576	-0.10326	-0.200628	-0.201702	-0.0803313	0.0694869	0.180736	0.139014	7.39677e-08	-0.163614	-0.230334	-0.157835	-0.0591131	0.0255801	0.0662444	0.140398	0.306808	0.50009	0.636989	0.69136	0.622439	0.443217	0.182745	-0.116035	-0.392507	-0.602318	-0.717145	-0.764245	-0.725281	-0.698763	-0.59385	-0.4968	-0.439651
-0.0293631	0.0334225	0.133364	0.233868	0.311122	0.312429	0.254585	0.142939	0.0225004	-0.0837502	-0.176778	-0.242803	-0.270334	-0.242763	-0.189731	-0.196474	-0.206264	-0.114398	0.121849	0.384194	0.600973	0.664383	0.562022	0.327616	0.0815582	-0.0923133	-0.128773	-0.0582801	0.0741656	0.212713	0.315368	0.348729	0.340585	0.288157	0.249773	0.211878	0.170974	0.152367	0.114493	0.0824952	0.0723671	0.135683	0.234757	0.312431	0.305275	0.268755	0.207541	0.14132	0.101007	0.102502
-0.461286	-0.286652	-0.0733488	0.125011	0.250476	0.254536	0.207091	0.127565	0.0415329	-0.0108399	-0.00889748	0.055824	0.0687381	0.0117404	-0.148801	-0.434834	-0.714124	-0.959223	-1.07713	-1.09496	-0.95647	-0.736906	-0.502961	-0.330165	-0.144737	0.0841704	0.436141	0.853342	1.33748	1.74892	1.8706	1.61594	1.05964	0.468117	0.0189767	-0.101792	0.0494487	0.253862	0.330706	0.183528	-0.124614	-0.452012	-0.643413	-0.651471	-0.477188	-0.277665	-0.130662	-0.0476861	0.00822986	0.0356229
-0.811927	-0.665736	-0.458274	-0.247963	-0.0128888	0.176157	0.306109	0.408931	0.420472	0.375874	0.309375	0.213137	0.152504	0.180806	0.253955	0.348177	0.540795	0.733414	0.817737	0.75576	0.546801	0.327559	0.204752	0.166464	0.218662	0.312065	0.392897	0.487289	0.572646	0.579118	0.55585	0.530945	0.50515	0.48113	0.394367	0.264662	0.114381	0.0180822	-0.0268683	-0.0506457	-0.102192	-0.15356	-0.171639	-0.146923	-0.050922	0.0953333	0.190314	0.16565	0.0774342	0.0258746
-0.154947	-0.114063	-0.0740473	-0.0775468	-0.050772	-0.00316329	0.0427145	0.0573163	0.0267977	-0.00861612	-0.030948	0.0419432	0.15675	0.28062	0.369776	0.341233	0.260828	0.190236	0.218962	0.382073	0.645503	0.894236	1.03588	1.05102	0.961254	0.907381	0.9729	1.17189	1.37582	1.50258	1.50936	1.41548	1.25786	1.0566	0.75795	0.369556	-0.0048794	-0.21594	-0.223874	-0.0484938	0.158969	0.28656	0.27125	0.133327	-0.0218462	-0.191824	-0.354019	-0.551193	-0.764944	-0.913701
-0.628243	-0.760433	-0.91389	-1.0189	-1.08404	-1.01895	-0.923171	-0.867745	-0.871354	-0.919653	-0.983394	-1.0146	-0.937391	-0.768598	-0.553963	-0.430327	-0.368832	-0.396733	-0.402353	-0.335474	-0.228555	-0.109841	-0.0654569	-0.104534	-0.231279	-0.342046	-0.415038	-0.398865	-0.340283	-0.285086	-0.158047	-0.0794845	-0.0446188	-0.0962937	-0.173657	-0.219152	-0.187237	-0.0744264	0.0128706	0.0656707	0.0511432	0.00892328	-0.0533625	-0.114244	-0.186811	-0.243329	-0.292393	-0.357779	-0.419168	-0.447137
-0.0992324	0.0148336	0.121746	0.224394	0.256411	0.21204	0.0889654	-0.0185946	-0.0894729	-0.0737676	-0.0168828	0.0367159	0.160077	0.236364	0.27022	0.220042	0.144918	0.100741	0.131732	0.241276	0.326045	0.377316	0.363209	0.322212	0.26173	0.202611	0.132145	0.0772644	0.0296207	-0.0338718	-0.0934828	-0.120642	-0.104393	-0.11237	-0.1175	-0.0557938	0.037121	0.147296	0.194844	0.205885	0.210593	0.237772	0.294415	0.361718	0.399943	0.366404	0.342513	0.33452	0.343867	0.329814
0.130657	0.20652	0.368311	0.463095	0.503921	0.449914	0.362162	0.310558	0.346758	0.474718	0.573737	0.633628	0.61715	0.56926	0.49861	0.429553	0.347242	0.283134	0.227481	0.153315	0.0836829	0.0519576	0.0709381	0.0616201	0.0556279	0.127708	0.236242	0.36494	0.42048	0.433378	0.438877	0.470625	0.536791	0.615408	0.660059	0.620881	0.592974	0.583638	0.594556	0.57814	0.523588	0.442479	0.367967	0.287201	0.132401	-0.0733667	-0.336438	-0.571015	-0.718637	-0.729055
0.452805	0.51746	0.525752	0.451932	0.357468	0.306205	0.342264	0.469727	0.568362	0.628019	0.611605	0.563902	0.493526	0.424738	0.342746	0.278888	0.223451	0.149573	0.0802111	0.0486091	0.0675158	0.058234	0.0522651	0.124065	0.232178	0.360375	0.4157	0.428547	0.434025	0.46565	0.531559	0.60987	0.654348	0.615322	0.587524	0.578224	0.589099	0.572747	0.518407	0.437613	0.36339	0.282939	0.128739	-0.0762284	-0.338278	-0.571943	-0.718991	-0.729369	-0.640624	-0.455009
-0.467389	-0.271294	-0.117699	-0.00734808	0.0525418	0.0528614	0.0453233	-0.0252205	-0.0622727	-0.118282	-0.194019	-0.170507	-0.0477665	0.09959	0.21062	0.299439	0.293273	0.230607	0.143794	0.0526899	0.0302747	0.0115184	0.0746248	0.198231	0.370609	0.609236	0.791436	0.900389	0.954367	0.933618	0.899255	0.829311	0.708956	0.593904	0.503041	0.548856	0.745464	0.968745	1.12531	1.22192	1.17565	1.07712	0.990491	0.938358	0.898017	0.786628	0.592816	0.346746	0.0898159	-0.12141
-1.11512	-0.869363	-0.586175	-0.362556	-0.177002	-0.0307175	0.00838972	-0.000249367	-0.107115	-0.286938	-0.47996	-0.621994	-0.706129	-0.717218	-0.618362	-0.436178	-0.230593	-0.021264	0.185845	0.342134	0.400907	0.340358	0.127497	-0.0993968	-0.316298	-0.422501	-0.359485	-0.173476	0.123971	0.407125	0.620906	0.756675	0.776283	0.719403	0.575275	0.448542	0.340636	0.309165	0.30763	0.323423	0.322887	0.256944	0.174591	-0.0159721	-0.240472	-0.479339	-0.651789	-0.681827	-0.516577	-0.221161
-0.735823	-0.688556	-0.608307	-0.477508	-0.267826	-0.0529458	0.123661	0.195413	0.142696	0.0100388	-0.11163	-0.152346	-0.0688891	0.0334203	0.0781394	0.125346	0.217775	0.31782	0.397502	0.377911	0.304111	0.268342	0.249375	0.25813	0.198333	0.0399553	-0.12807	-0.234948	-0.217837	-0.105033	0.0846164	0.278068	0.431745	0.572179	0.648356	0.719226	0.733131	0.690926	0.588511	0.426877	0.234212	0.119099	0.115077	0.217488	0.369217	0.51566	0.559794	0.537939	0.457791	0.374323
-0.299722	-0.196034	-0.0700643	0.0914522	0.307214	0.531724	0.782175	0.964062	1.08659	1.08766	0.930368	0.676188	0.440962	0.281603	0.262353	0.340025	0.405572	0.408783	0.321538	0.170497	0.0160411	-0.0611104	-0.0824492	0.0168898	0.0878215	0.182819	0.289732	0.411474	0.553602	0.692728	0.843101	0.92462	0.959868	0.940827	0.990825	1.04259	1.07072	1.02546	0.867271	0.612014	0.344576	0.174141	0.20345	0.423245	0.668226	0.830668	0.728262	0.406827	-0.0586871	-0.486075
-0.347447	-0.234542	-0.125331	-0.0387394	0.0200618	0.0660077	0.112507	0.169294	0.262856	0.358303	0.521473	0.707455	0.9325	1.19053	1.34172	1.35306	1.26904	1.22536	1.30252	1.38143	1.34621	1.10885	0.715149	0.318792	0.0862637	0.0784084	0.248134	0.449738	0.621848	0.733408	0.80565	0.87954	0.948044	0.935116	0.848686	0.737563	0.615915	0.559803	0.511534	0.450858	0.317786	0.18845	0.126961	0.0989213	0.0669604	-0.00404778	-0.144572	-0.286927	-0.403307	-0.421838
0.687461	0.838761	1.0396	1.28355	1.42551	1.433	1.34438	1.29831	1.37969	1.46293	1.42578	1.1754	0.760111	0.342019	0.0967397	0.0884536	0.267487	0.480146	0.661693	0.779371	0.855575	0.933517	1.00578	0.99214	0.900971	0.783754	0.655436	0.596247	0.545331	0.481328	0.340957	0.20453	0.139669	0.110091	0.0763779	0.00147582	-0.146755	-0.296916	-0.419677	-0.439224	-0.420568	-0.500836	-0.599662	-0.597715	-0.488673	-0.240739	0.0588397	0.278497	0.368685	0.242382
1.12907	0.813614	0.462412	0.152964	-0.0229278	-0.0116887	0.141601	0.323682	0.479124	0.579881	0.645127	0.711862	0.773732	0.762055	0.683996	0.583633	0.473766	0.423088	0.379493	0.324693	0.204507	0.0876967	0.0321625	0.00683772	-0.022028	-0.0861598	-0.213076	-0.341646	-0.446755	-0.463491	-0.447517	-0.516243	-0.600859	-0.599192	-0.505829	-0.293546	-0.0370444	0.151028	0.228248	0.120106	-0.0506147	-0.244944	-0.465055	-0.673219	-0.798341	-0.837721	-0.791506	-0.72766	-0.664613	-0.609503
0.112868	0.151413	0.252526	0.405399	0.586441	0.769963	0.924591	1.00286	0.963966	0.800613	0.649374	0.543261	0.480327	0.473756	0.421123	0.325413	0.169369	0.0557744	0.0616763	0.206489	0.44258	0.727827	1.01659	1.26076	1.36271	1.31275	1.15648	1.00175	0.940642	1.00455	1.19407	1.35003	1.39838	1.27904	1.10846	0.901351	0.77455	0.642882	0.557574	0.490303	0.408245	0.31896	0.227054	0.14188	0.0785532	0.0297683	-0.0291986	-0.133982	-0.311721	-0.50619
-0.211201	-0.33636	-0.520509	-0.749365	-0.934953	-0.98589	-0.897759	-0.79779	-0.747024	-0.74031	-0.736892	-0.716408	-0.691481	-0.615401	-0.507572	-0.375485	-0.246291	-0.126019	-0.0537847	-0.0750745	-0.0913493	-0.0905394	-0.00919792	0.0740914	0.137992	0.133958	0.0462988	-0.0214822	-0.0361635	0.00847998	0.0147729	-0.0171729	-0.0734972	-0.136813	-0.190882	-0.205556	-0.167979	-0.155866	-0.134272	-0.161249	-0.162807	-0.179974	-0.19571	-0.225455	-0.308424	-0.435559	-0.587484	-0.692004	-0.720086	-0.671489
-0.00931641	0.250778	0.382446	0.447532	0.373528	0.252055	0.179848	0.159013	0.176108	0.15306	0.102046	-0.0124708	-0.235329	-0.569817	-0.905079	-1.18828	-1.3799	-1.42897	-1.29016	-0.921828	-0.465439	-0.0105919	0.371722	0.610554	0.715641	0.70119	0.63453	0.457914	0.289633	0.170345	0.0878983	0.0703841	0.0820605	0.0529985	-0.0323965	-0.157611	-0.289994	-0.306229	-0.281129	-0.184961	0.00552022	0.172434	0.344787	0.48976	0.602078	0.682365	0.714876	0.648663	0.516846	0.417694
-0.637019	-0.493961	-0.411794	-0.396561	-0.474382	-0.627035	-0.713177	-0.649154	-0.454126	-0.226353	-0.113904	-0.182956	-0.34649	-0.476165	-0.513379	-0.453555	-0.329147	-0.179979	-0.0482572	0.139224	0.303314	0.480842	0.606769	0.631069	0.607014	0.548266	0.478412	0.418665	0.431375	0.456891	0.477103	0.480022	0.497315	0.483124	0.452141	0.380899	0.271461	0.201551	0.182634	0.264189	0.352063	0.391074	0.371973	0.368057	0.361335	0.338217	0.234617	0.0819661	-0.0091555	-0.00949786
0.838924	0.689236	0.565796	0.469664	0.399303	0.406798	0.433229	0.454164	0.457188	0.4751	0.460401	0.428308	0.354514	0.241155	0.168741	0.149147	0.233623	0.324645	0.365053	0.345268	0.341212	0.334249	0.310303	0.202992	0.044872	-0.0495139	-0.0498685	0.0214576	0.138203	0.258762	0.333554	0.329034	0.239081	0.0965906	-0.0927219	-0.247144	-0.303258	-0.276091	-0.189267	-0.125649	-0.0827456	-0.0489706	0.00697808	0.0860524	0.156858	0.208751	0.190219	0.0718777	-0.0682461	-0.17385
0.0850428	0.25652	0.371748	0.422496	0.443806	0.465371	0.451069	0.419845	0.348049	0.237759	0.167304	0.148241	0.23043	0.318988	0.358303	0.339053	0.335107	0.328332	0.305035	0.200628	0.0467886	-0.0450424	-0.0453875	0.024008	0.137593	0.254889	0.327657	0.323258	0.23574	0.0971072	-0.0870808	-0.237323	-0.291918	-0.265487	-0.181013	-0.119117	-0.0773746	-0.0445139	0.00992036	0.0868542	0.155743	0.206232	0.188201	0.0730633	-0.0632676	-0.166013	-0.215837	-0.189258	-0.127901	-0.099614
-0.992564	-0.996601	-0.863271	-0.673324	-0.494018	-0.340805	-0.241371	-0.18838	-0.160299	-0.221606	-0.417365	-0.630149	-0.757854	-0.793099	-0.695394	-0.478909	-0.186006	0.139579	0.441389	0.658724	0.670598	0.411891	-0.0785876	-0.563532	-0.849892	-0.788402	-0.420469	0.0342539	0.356416	0.378899	0.203397	-0.0161638	-0.139431	-0.0755681	0.0394306	0.112722	0.17014	0.152608	0.106268	0.106616	0.0858345	0.0492847	-0.0235703	-0.146662	-0.295125	-0.481972	-0.652543	-0.800518	-0.955259	-1.12257
0.145312	-0.0130233	-0.26578	-0.49882	-0.622876	-0.658126	-0.558164	-0.33668	-0.0370121	0.296092	0.604873	0.827227	0.839375	0.574693	0.072887	-0.423257	-0.71623	-0.65332	-0.27689	0.188335	0.517937	0.540939	0.361384	0.136752	0.0106389	0.0759762	0.193631	0.268615	0.327359	0.309422	0.262012	0.262367	0.241106	0.203712	0.129175	0.00324017	-0.148652	-0.339814	-0.514324	-0.665716	-0.824032	-0.995204	-1.19932	-1.34319	-1.4054	-1.32565	-1.22514	-1.11342	-0.964286	-0.761777
-1.10633	-0.937914	-0.759526	-0.56586	-0.422046	-0.424359	-0.557383	-0.744521	-0.892825	-0.898978	-0.784665	-0.600197	-0.477948	-0.399047	-0.351941	-0.286801	-0.217436	-0.147143	-0.0931251	-0.0733706	-0.033261	-0.00799493	0.103202	0.301089	0.594884	0.895812	1.11477	1.23141	1.24678	1.24135	1.23783	1.22986	1.19862	1.13887	1.02521	0.887048	0.730076	0.568734	0.431767	0.334913	0.329507	0.410311	0.469212	0.456001	0.374631	0.260544	0.171349	0.17082	0.206193	0.312001
0.582425	0.56587	0.506688	0.428329	0.362627	0.366273	0.44426	0.501108	0.488357	0.409823	0.299714	0.213627	0.213117	0.247257	0.349377	0.484234	0.596282	0.610928	0.496573	0.257359	0.069012	-0.00251971	0.101841	0.330463	0.478773	0.496536	0.421057	0.340975	0.366203	0.440912	0.446663	0.453938	0.455586	0.463347	0.483257	0.505762	0.485268	0.506509	0.520898	0.504861	0.431425	0.314903	0.263306	0.247049	0.267352	0.261663	0.220444	0.220569	0.294216	0.437983
-0.891796	-1.03411	-1.09214	-0.9972	-0.788481	-0.549799	-0.353967	-0.152971	-0.0100911	0.0844744	0.13751	0.132192	0.147263	0.202031	0.271463	0.333766	0.436521	0.552843	0.706789	0.846569	0.99431	1.17072	1.27953	1.28804	1.17572	0.954465	0.64293	0.350865	0.0496736	-0.192247	-0.407733	-0.542564	-0.621597	-0.620637	-0.621247	-0.621269	-0.645069	-0.678981	-0.683656	-0.65675	-0.586661	-0.504845	-0.462441	-0.441457	-0.465533	-0.575676	-0.777167	-1.06534	-1.32621	-1.48913
-0.160097	-0.1665	-0.165868	-0.189392	-0.240957	-0.287985	-0.280127	-0.262452	-0.231887	-0.3347	-0.507009	-0.675705	-0.736623	-0.731374	-0.683078	-0.623405	-0.567282	-0.464061	-0.277685	-0.0316763	0.161001	0.233589	0.17692	0.078663	-0.00204383	-0.00935683	0.0368141	0.106724	0.163522	0.19624	0.231433	0.301815	0.412421	0.505803	0.538987	0.478251	0.364017	0.283017	0.36676	0.524908	0.710835	0.808225	0.725197	0.538188	0.367118	0.258401	0.235654	0.257935	0.300601	0.31541
-1.13232	-0.921724	-0.77694	-0.669926	-0.591668	-0.532551	-0.430073	-0.245036	-0.000796178	0.190496	0.262562	0.2063	0.10875	0.0286232	0.0213628	0.0672018	0.136609	0.192999	0.225482	0.260422	0.330297	0.440108	0.532819	0.565765	0.505465	0.392053	0.311635	0.394776	0.551786	0.736377	0.833067	0.750635	0.564971	0.39513	0.287196	0.264612	0.286733	0.329092	0.343795	0.301586	0.212684	0.119828	0.0590093	0.0572533	0.11971	0.20442	0.243737	0.262742	0.291637	0.306138
0.606926	0.487935	0.351068	0.229193	0.150937	0.150395	0.19668	0.266763	0.323703	0.356502	0.391783	0.462339	0.573219	0.666833	0.7001	0.639213	0.524696	0.443494	0.527445	0.685985	0.872374	0.970006	0.886772	0.699299	0.527804	0.418817	0.396013	0.41835	0.461121	0.475968	0.433348	0.343579	0.249819	0.188408	0.186635	0.2497	0.335235	0.374935	0.394125	0.423301	0.437944	0.422218	0.394723	0.377316	0.410751	0.470107	0.441229	0.326551	0.120214	-0.0590722
0.161017	0.0448528	0.016796	-4.88151e-05	0.0338218	0.145617	0.254474	0.310145	0.342051	0.315315	0.332896	0.343864	0.347331	0.379296	0.417787	0.482163	0.608573	0.750601	0.784446	0.749193	0.645102	0.526592	0.402338	0.264979	0.157872	0.131986	0.199559	0.28155	0.41424	0.499599	0.628487	0.779752	0.969287	1.15846	1.21073	1.08993	0.820591	0.583649	0.359453	0.19274	0.118105	0.187117	0.351842	0.522337	0.634576	0.604858	0.510099	0.303226	0.153675	0.0502686
0.418048	0.37372	0.345956	0.308208	0.283639	0.241438	0.266348	0.329069	0.470953	0.635418	0.740157	0.751098	0.649061	0.482667	0.329255	0.220428	0.192668	0.222832	0.19881	0.134993	0.059305	-0.0139643	-0.0188779	0.0329699	0.104474	0.142176	0.159658	0.181408	0.272123	0.409116	0.528517	0.515326	0.374294	0.210891	0.0594281	-0.07701	-0.228026	-0.4683	-0.663531	-0.799946	-0.829077	-0.783186	-0.783738	-0.756787	-0.681486	-0.623061	-0.507973	-0.344348	-0.195111	-0.0917234
0.311481	0.285331	0.240553	0.27246	0.336047	0.481549	0.649844	0.757022	0.768218	0.663805	0.493536	0.336551	0.225189	0.196784	0.22765	0.203068	0.137765	0.0603145	-0.014661	-0.0196891	0.0333662	0.106536	0.145115	0.163005	0.185261	0.278089	0.418272	0.540453	0.526955	0.382639	0.21543	0.0604405	-0.079175	-0.233708	-0.479577	-0.679355	-0.818947	-0.848756	-0.801796	-0.802361	-0.774783	-0.697728	-0.637942	-0.520174	-0.352739	-0.200026	-0.0942311	-0.0489427	-0.0241847	0.0394977
0.517422	0.481188	0.442168	0.422469	0.4448	0.468503	0.527506	0.566232	0.578555	0.570163	0.562158	0.530511	0.467503	0.436941	0.401071	0.306772	0.19356	0.0638797	-0.0152898	-0.0368666	0.0527877	0.266006	0.560166	0.822134	1.02369	1.12943	1.17344	1.17447	1.15354	1.16458	1.19804	1.19285	1.08359	0.902631	0.680522	0.525666	0.434441	0.428255	0.387736	0.290856	0.165074	0.0473131	-0.00188194	0.0214217	0.0964473	0.171296	0.223254	0.316249	0.454185	0.60795
0.698005	0.684174	0.649343	0.584286	0.494715	0.388696	0.209868	0.0787322	-0.00644505	-0.0167409	0.010459	0.0694901	0.158954	0.326593	0.568019	0.874031	1.18386	1.37419	1.41512	1.35829	1.24614	1.09362	0.911516	0.721576	0.482988	0.199633	0.0333041	0.0723831	0.265363	0.452533	0.555008	0.516618	0.49204	0.542031	0.72775	0.925106	1.08928	1.14347	1.12225	0.984581	0.780715	0.608372	0.477163	0.386183	0.284743	0.151534	0.0890055	0.117137	0.195576	0.377852
-0.047966	-0.279661	-0.348198	-0.246549	-0.0354944	0.157246	0.256503	0.219319	0.195512	0.243933	0.423818	0.614974	0.773991	0.826478	0.805924	0.672581	0.475119	0.30819	0.181102	0.0929805	-0.00527257	-0.134297	-0.194861	-0.167613	-0.091639	0.0849111	0.272188	0.465994	0.663574	0.892265	1.06584	1.23445	1.41138	1.55335	1.65219	1.66758	1.6345	1.51097	1.33145	1.101	0.843494	0.496394	0.22713	0.145185	0.264401	0.46772	0.717755	0.804021	0.688686	0.435105
0.758332	0.681277	0.619425	0.521465	0.448228	0.39416	0.342067	0.2844	0.211216	0.170325	0.188454	0.298224	0.462453	0.601459	0.56559	0.352853	0.0304662	-0.21727	-0.274463	-0.160568	-0.027451	0.0014607	-0.0914468	-0.262256	-0.363762	-0.376141	-0.340584	-0.403501	-0.534144	-0.661957	-0.665047	-0.488568	-0.123947	0.269374	0.651951	0.911055	0.976732	0.88952	0.668765	0.370034	0.159475	0.025736	-0.0434431	-0.000787376	0.0316428	0.08519	0.138651	0.182839	0.234439	0.294286
-0.502021	-0.396954	-0.276752	-0.160999	-0.0938699	-0.0360368	0.0695488	0.24726	0.426745	0.550487	0.581116	0.532848	0.426154	0.323227	0.24801	0.149349	0.0478934	-0.0276533	-0.0942103	-0.153911	-0.195055	-0.24073	-0.233199	-0.185511	-0.0901536	0.00992465	0.0440611	-0.0306076	-0.15223	-0.247616	-0.232894	-0.080313	0.12812	0.271017	0.220465	0.0432088	-0.112344	-0.0839814	0.125137	0.359527	0.521882	0.577882	0.520786	0.412562	0.357111	0.338023	0.322005	0.324042	0.3742	0.482094
0.226216	0.201268	0.0804295	-0.0620999	-0.2614	-0.458772	-0.585797	-0.571589	-0.420826	-0.192668	0.127181	0.558129	0.986682	1.27732	1.40885	1.38053	1.30748	1.1951	1.06628	0.903301	0.703588	0.483874	0.246621	0.0422403	-0.00458389	0.150104	0.366025	0.529839	0.569519	0.449605	0.255601	0.129687	0.126886	0.232693	0.27269	0.201374	0.0982388	0.0040948	-0.0428879	-0.0217705	0.0453876	0.166341	0.355403	0.603716	0.86017	0.974516	0.911388	0.768002	0.616545	0.598361
-0.145781	0.167136	0.534472	0.869664	1.11677	1.27574	1.37412	1.48448	1.57926	1.62177	1.61187	1.61122	1.63627	1.77565	1.96232	2.05456	1.91195	1.51693	0.99301	0.535158	0.243515	0.122811	0.186965	0.332433	0.453701	0.540013	0.624876	0.726371	0.795259	0.797329	0.700543	0.571579	0.458177	0.321786	0.267685	0.265627	0.35672	0.52354	0.678417	0.727737	0.656061	0.528757	0.291413	0.0351842	-0.249825	-0.568481	-0.788424	-0.900955	-0.796322	-0.572593
-1.26289	-1.35875	-1.38333	-1.2509	-1.04451	-0.822469	-0.643457	-0.532941	-0.482076	-0.441589	-0.372467	-0.28829	-0.209961	-0.16909	-0.181003	-0.330249	-0.552663	-0.84283	-1.09877	-1.32117	-1.4673	-1.52892	-1.45979	-1.27415	-1.03355	-0.816483	-0.675309	-0.600372	-0.622376	-0.690535	-0.771025	-0.844336	-0.911133	-0.896946	-0.769216	-0.55408	-0.33015	-0.235377	-0.301101	-0.510031	-0.739303	-0.892887	-0.896812	-0.757576	-0.58752	-0.423036	-0.32838	-0.304849	-0.354796	-0.456147
-1.45552	-1.42893	-1.38311	-1.27044	-1.08291	-0.858385	-0.661095	-0.532785	-0.464677	-0.484676	-0.546624	-0.619779	-0.686409	-0.74712	-0.734226	-0.618135	-0.422603	-0.219079	-0.132942	-0.192677	-0.382568	-0.590948	-0.730537	-0.734104	-0.607556	-0.452996	-0.303501	-0.21747	-0.196083	-0.241478	-0.333594	-0.430969	-0.465441	-0.46519	-0.431418	-0.412009	-0.433403	-0.428486	-0.39508	-0.295046	-0.209267	-0.212258	-0.336744	-0.539462	-0.715273	-0.849012	-0.897921	-0.922642	-0.911962	-0.899036
0.89311	0.661514	0.424531	0.240972	0.177064	0.32015	0.571085	0.796779	0.909333	0.865443	0.726669	0.589593	0.511984	0.484564	0.444425	0.380541	0.31817	0.329835	0.445653	0.653228	0.846277	0.912691	0.844565	0.709637	0.593283	0.512995	0.525791	0.562831	0.536531	0.448302	0.374385	0.32849	0.32202	0.315276	0.297408	0.260506	0.197399	0.101428	0.0315801	-0.0146399	-0.00384153	0.0399475	0.0826351	0.0568853	-0.0701742	-0.220903	-0.315599	-0.302855	-0.170381	0.00497416
0.115713	0.37199	0.535504	0.582193	0.484596	0.274951	0.0804015	-0.0327219	-0.0712517	0.0484909	0.234498	0.406389	0.491385	0.461725	0.396003	0.330351	0.287451	0.300517	0.321051	0.296994	0.281873	0.302514	0.323469	0.325416	0.288085	0.203731	0.147318	0.129617	0.167156	0.190383	0.136755	0.0101229	-0.166516	-0.402412	-0.660959	-0.809978	-0.846485	-0.805846	-0.79393	-0.826628	-0.821407	-0.76611	-0.615759	-0.423678	-0.19585	-0.0365878	0.0641463	0.101376	0.0699103	-0.00803633
0.274204	0.301657	0.380838	0.406974	0.407339	0.249163	-0.025186	-0.383462	-0.631968	-0.702657	-0.555701	-0.337667	-0.186878	-0.174154	-0.299674	-0.393685	-0.44226	-0.387919	-0.300377	-0.128137	0.0235273	0.0917983	0.065102	-0.0528665	-0.156827	-0.15795	-0.102156	0.0294858	0.172478	0.302276	0.480825	0.636788	0.817316	0.939621	0.947029	0.894345	0.816797	0.787671	0.763584	0.788011	0.769258	0.711496	0.599125	0.417677	0.214105	0.0172024	-0.127178	-0.170207	-0.118187	-0.0234061
0.358606	0.259653	0.0972237	0.00679629	-0.0680885	0.0167544	0.208304	0.438104	0.642513	0.807999	0.903295	0.970309	1.06334	1.10579	1.06381	0.94849	0.825	0.749661	0.742795	0.765857	0.725607	0.60586	0.440671	0.264475	0.10259	-0.102337	-0.342618	-0.579088	-0.739843	-0.791052	-0.68747	-0.540804	-0.410179	-0.380102	-0.43486	-0.501765	-0.577901	-0.595345	-0.584081	-0.497994	-0.372159	-0.339291	-0.413516	-0.488304	-0.538903	-0.434185	-0.275765	-0.184822	-0.202028	-0.330036
0.497202	0.637851	0.784376	0.928985	1.02475	1.04962	1.04665	0.995517	0.964652	0.866416	0.73463	0.578907	0.480895	0.509984	0.616833	0.801085	0.928664	0.954016	0.826924	0.661733	0.535844	0.508415	0.569184	0.618419	0.595457	0.473534	0.352098	0.299021	0.363451	0.584262	0.821333	0.991138	0.981426	0.79922	0.576105	0.42016	0.357125	0.363429	0.321345	0.16617	-0.0858398	-0.315251	-0.393296	-0.339884	-0.232965	-0.115371	-0.0169918	0.0268541	0.113354	0.268593
0.720285	0.746622	0.771106	0.705139	0.589263	0.44164	0.345095	0.373749	0.478999	0.660494	0.786164	0.811137	0.685947	0.523227	0.399222	0.372203	0.432063	0.480562	0.457943	0.337844	0.218225	0.165942	0.229408	0.446916	0.680439	0.847703	0.838137	0.658657	0.43888	0.285268	0.223177	0.229386	0.187932	0.0350789	-0.21316	-0.439139	-0.516016	-0.463404	-0.358084	-0.24225	-0.145342	-0.102153	-0.0169466	0.13597	0.342804	0.494305	0.534584	0.437434	0.236274	0.0569467
0.42791	0.445313	0.481592	0.521834	0.586578	0.655699	0.752264	0.896893	1.02948	1.0826	0.997494	0.801469	0.582021	0.372549	0.33036	0.443439	0.633657	0.739318	0.656161	0.374158	0.00664255	-0.250696	-0.380356	-0.360161	-0.28461	-0.150873	-0.0724286	-0.0365487	-0.0133836	-0.00145537	0.0475134	0.0457415	0.0768276	0.142666	0.222001	0.342307	0.476126	0.498827	0.388957	0.186041	-0.0430991	-0.233221	-0.344711	-0.364015	-0.350411	-0.38927	-0.508807	-0.701312	-0.892734	-0.986432
-0.39849	-0.497542	-0.599654	-0.653704	-0.680243	-0.650361	-0.683145	-0.765901	-0.855607	-0.90002	-0.867527	-0.774162	-0.644432	-0.55832	-0.552677	-0.591571	-0.629666	-0.66607	-0.63436	-0.565957	-0.411208	-0.245252	-0.0485501	0.0493276	0.00527975	-0.176197	-0.381149	-0.57287	-0.699832	-0.769215	-0.798715	-0.799593	-0.741065	-0.625362	-0.462265	-0.278996	-0.118435	-0.0192291	-0.0440835	-0.174729	-0.393553	-0.63595	-0.835197	-0.965263	-1.01314	-0.997499	-0.936034	-0.829544	-0.732476	-0.610274
-0.704467	-0.795852	-0.849317	-0.856659	-0.891924	-0.888027	-0.845609	-0.738424	-0.623088	-0.487803	-0.377829	-0.291562	-0.222485	-0.156647	-0.101637	-0.0705715	-0.0202456	0.0684559	0.212561	0.352592	0.464707	0.508737	0.47074	0.376579	0.246588	0.148951	0.0729455	-0.0282075	-0.0842315	-0.143413	-0.209088	-0.318716	-0.346998	-0.340432	-0.247986	-0.0703429	0.141111	0.384818	0.556298	0.648368	0.565299	0.435528	0.250488	0.0791782	-0.0222186	-0.0661775	0.0477284	0.261291	0.52174	0.667926
0.0237209	0.0759888	0.0748154	0.0397489	-0.0609982	-0.085044	-0.0780078	0.0210546	0.211413	0.438002	0.699152	0.882906	0.981566	0.892551	0.753492	0.555207	0.371636	0.262982	0.215876	0.337935	0.566783	0.845874	1.00252	0.952783	0.737232	0.458456	0.278038	0.175035	0.23386	0.310975	0.395624	0.457332	0.465928	0.483878	0.523112	0.56148	0.531614	0.47614	0.420416	0.439811	0.554745	0.62102	0.568775	0.364708	0.0116974	-0.409259	-0.767705	-0.940743	-0.939582	-0.810159
0.385594	0.341322	0.294877	0.277078	0.246161	0.207746	0.168083	0.129947	0.103586	0.101186	0.0877743	0.0415798	-0.0330384	-0.174485	-0.330063	-0.473345	-0.560005	-0.584329	-0.540915	-0.457377	-0.378535	-0.31396	-0.30096	-0.294102	-0.338209	-0.440011	-0.547921	-0.665457	-0.691056	-0.658556	-0.641315	-0.666473	-0.65747	-0.591677	-0.491946	-0.331394	-0.188568	-0.139925	-0.19479	-0.329044	-0.482821	-0.599956	-0.671974	-0.697968	-0.654337	-0.62232	-0.61942	-0.617289	-0.582392	-0.482259
-1.25039	-1.08458	-0.883207	-0.633144	-0.4498	-0.30342	-0.231265	-0.180655	-0.137511	-0.118684	-0.0915213	-0.105725	-0.105701	-0.0623603	0.109548	0.345886	0.628973	0.885615	1.10567	1.20987	1.17649	0.984446	0.698003	0.449908	0.386839	0.503224	0.765483	1.03992	1.24748	1.23712	1.00555	0.607629	0.223636	-0.0111999	-0.09166	-0.0622813	0.0147144	0.160281	0.344174	0.510658	0.656648	0.796503	0.884709	0.93592	0.967463	0.999446	0.883743	0.638695	0.44857	0.333189
-1.16272	-1.07337	-1.01467	-0.962609	-0.890061	-0.777861	-0.611194	-0.425301	-0.18488	0.0545789	0.280983	0.440846	0.537131	0.537597	0.466091	0.366644	0.248276	0.139495	0.0205767	-0.060308	-0.0843253	-0.100542	-0.113638	-0.16164	-0.24823	-0.357095	-0.43749	-0.486686	-0.449218	-0.318675	-0.136422	0.0315771	0.125273	0.139333	0.147406	0.154439	0.152785	0.134633	0.0740298	0.036557	0.0238583	0.0226453	0.0505647	0.127669	0.225636	0.230697	0.166256	0.00591161	-0.151913	-0.29991
-1.90052	-1.83592	-1.69641	-1.53834	-1.31097	-1.00664	-0.657183	-0.366935	-0.11825	0.101681	0.295434	0.341137	0.193971	-0.150054	-0.576257	-0.877676	-0.880116	-0.563652	-0.0792089	0.30438	0.455289	0.428077	0.273182	0.078992	-0.0265713	-0.0860413	-0.133188	-0.234294	-0.33342	-0.355591	-0.33511	-0.305515	-0.322069	-0.365744	-0.44563	-0.461264	-0.338966	-0.113465	0.222332	0.543863	0.817461	0.967868	0.960687	0.813999	0.497366	0.198616	0.0676009	0.067686	0.18729	0.300475
-1.11434	-1.03765	-0.796177	-0.402538	0.0672532	0.413633	0.548634	0.524291	0.385723	0.212003	0.117567	0.0643653	0.0221886	-0.0682602	-0.156937	-0.176772	-0.15845	-0.131974	-0.146783	-0.185854	-0.257319	-0.271305	-0.161899	0.0398323	0.340233	0.627872	0.87263	1.00718	1.00076	0.869533	0.586277	0.319017	0.201812	0.201888	0.308885	0.410139	0.485533	0.493362	0.422342	0.355109	0.288965	0.204059	0.201307	0.256439	0.362001	0.50566	0.56545	0.613274	0.605065	0.512354
-0.600864	-0.581354	-0.485302	-0.344598	-0.205545	-0.142272	-0.15642	-0.15773	-0.124924	-0.101256	-0.0451218	-0.0175577	0.070593	0.171591	0.323679	0.469896	0.575285	0.588644	0.557217	0.500726	0.451899	0.402807	0.326058	0.247918	0.196117	0.224136	0.280604	0.349707	0.410521	0.400543	0.301036	0.153066	-0.0165226	-0.0596735	-0.00878427	0.110425	0.247123	0.274039	0.205854	0.0143927	-0.263769	-0.505055	-0.608431	-0.559795	-0.413167	-0.309461	-0.300192	-0.33764	-0.432234	-0.528103
0.618972	0.516951	0.408385	0.306995	0.249397	0.273591	0.330787	0.400781	0.46238	0.452274	0.351483	0.201604	0.0298283	-0.0138792	0.0376664	0.158413	0.296875	0.324138	0.255073	0.0611423	-0.220607	-0.465005	-0.569715	-0.520451	-0.371932	-0.266889	-0.2575	-0.295431	-0.391245	-0.48835	-0.564734	-0.6444	-0.681106	-0.614234	-0.472668	-0.319043	-0.174129	-0.139382	-0.16309	-0.232685	-0.229866	-0.128146	0.0416929	0.153386	0.122941	-0.000489751	-0.13152	-0.172702	-0.194298	-0.223081
-0.238565	0.141361	0.591045	1.11879	1.61853	2.01007	2.13039	2.0155	1.6755	1.27187	0.943485	0.825055	0.790245	0.80341	0.80953	0.737329	0.642039	0.571391	0.552478	0.625851	0.781722	0.844531	0.869203	0.877971	0.848708	0.794752	0.661139	0.5489	0.42241	0.361325	0.461755	0.680723	0.936358	1.17427	1.35828	1.49033	1.56664	1.45925	1.19919	0.791503	0.310137	-0.160339	-0.557102	-0.788854	-0.851741	-0.834937	-0.72104	-0.574782	-0.437984	-0.408452
-1.02307	-1.02764	-0.921393	-0.695139	-0.423308	-0.20181	-0.0717489	0.0168049	0.167642	0.407439	0.655354	0.841121	0.9035	0.860534	0.798237	0.795993	0.888517	1.00775	1.00988	0.845367	0.576245	0.234597	-0.0630137	-0.26554	-0.322364	-0.234945	-0.0229455	0.1717	0.335929	0.455657	0.554293	0.646568	0.696177	0.705125	0.642564	0.486046	0.262566	0.0499917	-0.141522	-0.237053	-0.238217	-0.151993	0.00736606	0.101141	0.1226	0.0501087	-0.11442	-0.260835	-0.308729	-0.220467
-0.77152	-0.857816	-0.944049	-1.04796	-1.13849	-1.20039	-1.13297	-0.925568	-0.643545	-0.418923	-0.263635	-0.175543	-0.066526	0.0531824	0.230894	0.43492	0.619248	0.771146	0.865037	0.855946	0.77886	0.662649	0.511476	0.300195	0.0239526	-0.223726	-0.355292	-0.273766	-0.0186676	0.280968	0.49247	0.538493	0.458646	0.362983	0.318712	0.314788	0.317401	0.384484	0.530476	0.684927	0.775511	0.835556	0.90241	1.02166	1.09865	1.19078	1.20907	1.13247	0.929598	0.653634
0.946675	0.982507	0.941964	0.86391	0.751802	0.611078	0.405697	0.137169	-0.103593	-0.231486	-0.152236	0.0957388	0.387008	0.592603	0.637341	0.559723	0.466732	0.423697	0.419883	0.422423	0.487633	0.629547	0.779686	0.86774	0.926109	0.991096	1.10701	1.18186	1.27141	1.2892	1.21473	1.01752	0.749267	0.4224	0.127539	-0.0610613	-0.0698223	0.0121516	0.074768	0.145935	0.188999	0.255518	0.255366	0.192283	-0.00645394	-0.325705	-0.609413	-0.789432	-0.811648	-0.663379
-0.518426	-0.358162	-0.221581	-0.138558	-0.133489	-0.180714	-0.252758	-0.301612	-0.336011	-0.348196	-0.285104	-0.221846	-0.13226	-0.0200515	0.0975507	0.22	0.25751	0.2641	0.188986	0.0799129	-0.0584272	-0.185468	-0.236252	-0.186977	-0.0581936	0.100836	0.193935	0.164599	0.0788083	-0.0251837	-0.0530687	0.00697256	0.121339	0.24064	0.364953	0.461309	0.530913	0.54717	0.502266	0.37129	0.165164	-0.0689031	-0.250294	-0.344424	-0.341602	-0.318495	-0.302019	-0.293222	-0.283164	-0.242977
0.625635	0.676569	0.704532	0.606955	0.424567	0.214932	0.0965173	0.139426	0.312558	0.479181	0.578774	0.569708	0.475121	0.314558	0.115123	-0.0711848	-0.220651	-0.267774	-0.244149	-0.220029	-0.15142	-0.112844	-0.0669961	0.0197079	0.139395	0.240924	0.321022	0.375047	0.491336	0.659077	0.79899	0.910966	0.898344	0.831233	0.71996	0.603161	0.382052	0.0864193	-0.207752	-0.40079	-0.554507	-0.622919	-0.63977	-0.633556	-0.585665	-0.506793	-0.465106	-0.467897	-0.49826	-0.502182
0.576195	0.317616	0.110823	0.0195248	0.0772827	0.254391	0.418612	0.51677	0.507835	0.41461	0.256362	0.0598013	-0.123821	-0.271133	-0.317577	-0.294293	-0.27052	-0.2029	-0.16488	-0.119693	-0.0342385	0.0837238	0.183789	0.262733	0.31598	0.430592	0.595916	0.733812	0.844174	0.831734	0.76559	0.655921	0.540806	0.322883	0.0315113	-0.25842	-0.448676	-0.600178	-0.667603	-0.684211	-0.678087	-0.630886	-0.553151	-0.512065	-0.514816	-0.544741	-0.548607	-0.53904	-0.449567	-0.356687
-0.492881	-0.433031	-0.361625	-0.330016	-0.258768	-0.223092	-0.176334	-0.0879073	0.0341573	0.137703	0.219392	0.27449	0.393089	0.564161	0.706854	0.821054	0.808181	0.739737	0.626254	0.507135	0.281634	-0.0198709	-0.319885	-0.516758	-0.673528	-0.743298	-0.760484	-0.754147	-0.705305	-0.624866	-0.582351	-0.585198	-0.616164	-0.620164	-0.610265	-0.51768	-0.421569	-0.277397	-0.151525	-0.0184941	0.0413664	0.0874425	0.0971151	0.0853774	0.0653107	-0.0190243	-0.159366	-0.305181	-0.395272	-0.405125
-0.199957	-0.159879	-0.193275	-0.270772	-0.352794	-0.406191	-0.377846	-0.298975	-0.187253	-0.118971	-0.108001	-0.138145	-0.167798	-0.193384	-0.210395	-0.209416	-0.173651	-0.0880049	0.0514481	0.171739	0.232543	0.259029	0.254396	0.227775	0.169128	0.101343	0.0262621	-0.0653876	-0.122784	-0.108633	0.0154082	0.233206	0.443715	0.572339	0.499943	0.249704	-0.0163566	-0.227269	-0.388249	-0.439039	-0.388543	-0.273971	-0.147637	-0.0786376	-0.0963476	-0.205665	-0.35589	-0.513571	-0.610072	-0.713736
0.550888	0.433095	0.274257	0.0865142	-0.0673333	-0.151792	-0.143443	-0.114745	-0.117098	-0.126345	-0.095199	-0.0590821	-0.0391801	0.0647762	0.219823	0.325229	0.356122	0.329147	0.283411	0.21919	0.200313	0.194867	0.171914	0.188145	0.298024	0.500768	0.688238	0.804474	0.771622	0.622556	0.527499	0.544251	0.646145	0.763332	0.794221	0.741925	0.713967	0.70383	0.775645	0.814091	0.828536	0.872289	0.855087	0.811308	0.699564	0.652363	0.647022	0.692617	0.692386	0.749214
-0.0255952	-0.257768	-0.502386	-0.644871	-0.716563	-0.671666	-0.516024	-0.335373	-0.290671	-0.40703	-0.622802	-0.758395	-0.751378	-0.635117	-0.450978	-0.342626	-0.462372	-0.707047	-0.936042	-1.07361	-1.02625	-0.844537	-0.575676	-0.310455	-0.165494	-0.0928269	-0.067437	-0.0408448	-0.039052	-0.0144983	0.0263919	0.0218834	-0.0396459	-0.16426	-0.304891	-0.449394	-0.540417	-0.53567	-0.358149	-0.1195	0.0622292	0.10762	0.0438156	-0.0693128	-0.0807595	-0.0304058	0.0535364	0.158667	0.223461	0.229955
-0.44412	-0.48964	-0.544048	-0.575074	-0.629148	-0.654157	-0.664778	-0.657691	-0.618493	-0.55405	-0.488705	-0.397411	-0.296738	-0.174912	-0.0462357	0.0254674	0.00201782	-0.0976765	-0.16703	-0.171767	-0.137216	-0.161438	-0.219733	-0.399708	-0.624782	-0.821864	-0.881136	-0.719537	-0.438299	-0.109498	0.0955714	0.184809	0.207357	0.27714	0.437168	0.665022	0.898334	1.02054	1.02756	0.898784	0.718027	0.544392	0.452529	0.444659	0.413559	0.347075	0.225781	0.0657617	-0.072481	-0.160789
0.155349	0.374432	0.62654	0.884225	1.11718	1.23658	1.24337	1.1188	0.943933	0.775957	0.687089	0.679475	0.649389	0.585072	0.467731	0.312928	0.179191	0.0937614	0.0905993	0.15182	0.183358	0.193325	0.251469	0.316526	0.426653	0.5538	0.64041	0.706207	0.71889	0.710204	0.656267	0.55142	0.467167	0.447314	0.489254	0.535669	0.605569	0.65784	0.617115	0.463047	0.27443	0.10623	0.0115303	-0.0250511	-0.00662486	0.052298	0.149404	0.260668	0.378117	0.407278
0.123953	0.0491583	-0.0741835	-0.237685	-0.433278	-0.620509	-0.64818	-0.570126	-0.476561	-0.41215	-0.356809	-0.312651	-0.228022	-0.114395	-0.015555	0.0416805	0.111767	0.182236	0.316853	0.478389	0.718504	1.0093	1.2514	1.30299	1.13624	0.861928	0.58805	0.446221	0.50467	0.65824	0.804178	0.865308	0.817334	0.658965	0.431872	0.2414	0.102485	0.0572764	0.0325071	0.0815541	0.161319	0.123973	-0.0657644	-0.346082	-0.658119	-0.850942	-0.819695	-0.606218	-0.272218	-0.012365
1.24877	1.39996	1.50653	1.46841	1.2638	0.979794	0.710421	0.570926	0.628413	0.779456	0.922994	0.983119	0.935934	0.78017	0.556813	0.369474	0.232844	0.188379	0.164018	0.212258	0.290711	0.253979	0.0673627	-0.208344	-0.515247	-0.704898	-0.674165	-0.4642	-0.135695	0.119884	0.280816	0.270006	0.159009	0.0442021	0.06332	0.150172	0.272224	0.336897	0.288963	0.169478	-0.0290672	-0.194673	-0.302573	-0.328558	-0.336445	-0.312363	-0.343243	-0.377738	-0.422197	-0.43645
-0.890414	-0.644236	-0.388942	-0.131448	0.119997	0.257862	0.332116	0.266712	0.124312	0.0133016	-0.0179447	0.0557238	0.225622	0.413713	0.520679	0.536002	0.463889	0.387174	0.365393	0.441973	0.512032	0.490238	0.394816	0.276338	0.158556	0.102866	0.13847	0.200106	0.199748	0.147204	0.115459	0.173762	0.28225	0.416081	0.479126	0.431101	0.258135	0.0362673	-0.163405	-0.221773	-0.164562	0.00471774	0.165571	0.304893	0.391328	0.406962	0.352105	0.302419	0.305363	0.375556
0.394074	0.437141	0.431056	0.409737	0.312027	0.204445	0.179203	0.290683	0.437757	0.590075	0.671544	0.719852	0.779313	0.856674	0.936402	1.00095	1.04818	1.05652	1.01034	0.969471	0.933087	0.90664	0.861326	0.885891	0.921085	1.00616	1.12271	1.22346	1.33607	1.42658	1.50787	1.46901	1.35283	1.1484	0.918441	0.681169	0.511121	0.423246	0.433394	0.488825	0.519978	0.539579	0.615263	0.755466	0.857549	0.988082	1.08939	1.10735	0.990889	0.754171
0.816478	0.817045	0.86029	0.941311	1.01792	1.11279	1.19866	1.27578	1.23891	1.12869	0.934756	0.716591	0.491493	0.330169	0.246803	0.25643	0.309018	0.338572	0.357167	0.428968	0.561978	0.658823	0.782659	0.878774	0.895805	0.785322	0.560749	0.338429	0.184201	0.155168	0.221579	0.273767	0.222694	0.0937986	-0.00114813	-0.137397	-0.187018	-0.221385	-0.169003	-0.0905664	-0.0157108	0.0315351	0.086662	0.183783	0.300941	0.432393	0.421009	0.269035	0.0169735	-0.241958
0.259112	0.263148	0.357819	0.469211	0.554035	0.571006	0.452756	0.258332	0.117173	0.100003	0.252742	0.473264	0.688509	0.783717	0.781304	0.718892	0.707582	0.792861	0.947118	1.03745	0.981987	0.838923	0.697857	0.659248	0.738756	0.858114	0.930757	0.859074	0.702932	0.563492	0.462704	0.434584	0.44443	0.4543	0.390728	0.313614	0.247083	0.18955	0.112667	0.0417626	0.0170746	0.0550077	0.0957403	0.0682781	-0.059858	-0.187561	-0.289117	-0.268365	-0.188761	-0.0832162
0.305395	0.417939	0.577345	0.716294	0.787766	0.709808	0.550317	0.407886	0.304936	0.276213	0.28627	0.296352	0.231417	0.152648	0.0846911	0.0259235	-0.0526078	-0.125033	-0.150251	-0.111504	-0.0698977	-0.0979489	-0.228833	-0.359275	-0.463009	-0.441812	-0.360501	-0.252692	-0.134871	-0.0058773	0.117457	0.220186	0.333982	0.418596	0.459868	0.457999	0.429689	0.375998	0.297278	0.166443	0.0584256	0.0201051	0.010243	-0.021011	-0.0413382	-0.0826439	-0.0700049	0.0348578	0.123162	0.0904782
0.0451138	-0.0317271	-0.132863	-0.216297	-0.251859	-0.218022	-0.177169	-0.204712	-0.333227	-0.461306	-0.563163	-0.542349	-0.46251	-0.356654	-0.240966	-0.114308	0.0067934	0.107661	0.219397	0.302479	0.343004	0.341168	0.313371	0.260653	0.183358	0.0548922	-0.0511694	-0.088796	-0.0984796	-0.129168	-0.149127	-0.189684	-0.177274	-0.0743105	0.0123944	-0.0196972	-0.124323	-0.238328	-0.342266	-0.413468	-0.428184	-0.421697	-0.392717	-0.41673	-0.492539	-0.609121	-0.769893	-0.842996	-0.887905	-0.977753
-0.444165	-0.315765	-0.250503	-0.275432	-0.412012	-0.543115	-0.647544	-0.626204	-0.544349	-0.435819	-0.317208	-0.187352	-0.0631915	0.0402243	0.154782	0.239963	0.281511	0.279629	0.25113	0.19708	0.117833	-0.0138778	-0.122618	-0.161195	-0.171123	-0.202587	-0.22305	-0.264632	-0.251909	-0.146344	-0.057449	-0.0903512	-0.197619	-0.314504	-0.421068	-0.494068	-0.509156	-0.502505	-0.472793	-0.497412	-0.575136	-0.694663	-0.859495	-0.934445	-0.980488	-1.07261	-1.18757	-1.28248	-1.27901	-1.2172
-0.193568	-0.0502099	0.107238	0.263194	0.335726	0.279285	0.109264	-0.121946	-0.341709	-0.486841	-0.513969	-0.445339	-0.333592	-0.282062	-0.268289	-0.236691	-0.141725	0.0335805	0.259359	0.455588	0.607715	0.693921	0.719808	0.711921	0.632867	0.61195	0.622354	0.698146	0.810572	0.966654	1.15379	1.27365	1.25935	1.05478	0.690667	0.240423	-0.102015	-0.235308	-0.13479	0.0941706	0.370704	0.646423	0.815271	0.875429	0.880666	0.832597	0.780308	0.655874	0.483493	0.335152
0.407463	0.545296	0.653004	0.750876	0.810872	0.830343	0.822233	0.740939	0.719429	0.730128	0.808067	0.923679	1.08418	1.27662	1.39988	1.38517	1.1748	0.800376	0.337374	-0.0147661	-0.151836	-0.0484696	0.186978	0.471347	0.754879	0.928511	0.990373	0.995759	0.946328	0.892558	0.764598	0.587332	0.434788	0.345515	0.312353	0.322063	0.274117	0.178124	0.0775239	-0.00836782	-0.0367114	-0.0598541	-0.0855944	-0.0803599	0.0139342	0.131046	0.246938	0.277237	0.231737	0.180995
0.629728	0.752513	0.844874	0.871052	0.82517	0.70821	0.511203	0.311656	0.188087	0.131153	0.165926	0.245145	0.392378	0.516705	0.498955	0.388456	0.235833	0.152025	0.15596	0.326506	0.574303	0.77896	0.862569	0.81281	0.747248	0.687491	0.720387	0.81303	0.856227	0.823299	0.724149	0.627996	0.577968	0.585959	0.64957	0.794449	0.975263	1.12096	1.18597	1.12612	1.0799	1.08988	1.20769	1.27461	1.13896	0.814986	0.44687	0.202069	0.172005	0.30083
0.381621	0.247554	0.122505	0.0769422	0.104101	0.278367	0.520833	0.721087	0.802898	0.754209	0.690057	0.631586	0.663774	0.754424	0.796692	0.764473	0.667455	0.573371	0.524419	0.532238	0.594481	0.736242	0.913167	1.05573	1.11934	1.06078	1.01556	1.02532	1.1406	1.20607	1.07334	0.756338	0.396142	0.156607	0.12719	0.253243	0.432567	0.633345	0.817949	0.982146	1.03567	0.936205	0.678562	0.418149	0.22169	0.131817	0.10145	0.0693181	0.0130002	-0.0761211
0.302472	0.479274	0.634279	0.686518	0.660939	0.566438	0.475286	0.427859	0.435435	0.495738	0.633082	0.804494	0.942615	1.00424	0.947503	0.903692	0.91315	1.02484	1.08827	0.95968	0.652551	0.303579	0.0715079	0.0430074	0.165133	0.338869	0.533391	0.712243	0.871324	0.92318	0.826815	0.577199	0.3249	0.134563	0.0474894	0.018069	-0.0130617	-0.0676248	-0.153969	-0.212498	-0.265384	-0.346519	-0.428344	-0.478056	-0.471302	-0.435833	-0.273146	-0.0503321	0.169967	0.291628
-0.0373615	-0.240157	-0.504341	-0.745843	-0.909922	-1.01084	-0.967345	-0.871389	-0.753661	-0.68576	-0.632771	-0.546737	-0.383057	-0.162454	0.0405754	0.207936	0.225269	0.115986	0.0282096	0.00583695	0.0450517	0.0279408	-0.12362	-0.342391	-0.528768	-0.646778	-0.621541	-0.52874	-0.417078	-0.27387	-0.0640969	0.20579	0.418824	0.489797	0.398642	0.19184	-0.0524931	-0.281594	-0.415358	-0.459023	-0.429066	-0.383691	-0.255242	-0.116307	0.0121691	0.0565919	-0.0200857	-0.182031	-0.402499	-0.613195
-0.767971	-0.663734	-0.565996	-0.421996	-0.282602	-0.152118	-0.00776749	0.20368	0.47572	0.690453	0.761993	0.67011	0.461658	0.215376	-0.0155529	-0.150384	-0.194398	-0.164202	-0.118465	0.0110096	0.151053	0.280554	0.325331	0.248042	0.0848042	-0.137422	-0.349799	-0.504043	-0.59195	-0.638774	-0.61523	-0.56626	-0.480501	-0.25236	0.0128018	0.291585	0.531228	0.664539	0.73728	0.680133	0.572532	0.46824	0.405907	0.371042	0.384031	0.42985	0.461546	0.559595	0.632707	0.657542
-0.506241	-0.420616	-0.344872	-0.318883	-0.33486	-0.413574	-0.448488	-0.458076	-0.451361	-0.393782	-0.349132	-0.266781	-0.163628	-0.126836	-0.180104	-0.269478	-0.295703	-0.214694	-0.0802786	0.0364594	0.0658037	-0.0499901	-0.181595	-0.258719	-0.247359	-0.202683	-0.106988	-0.00929453	0.0821227	0.171308	0.276556	0.381925	0.431334	0.406004	0.325469	0.185602	0.0254741	-0.124436	-0.244809	-0.26791	-0.26978	-0.278506	-0.336999	-0.368166	-0.319824	-0.149255	0.0392858	0.12632	0.103044	0.0284265
0.421318	0.0654333	-0.234414	-0.477266	-0.594683	-0.6177	-0.600912	-0.525562	-0.429819	-0.354009	-0.304529	-0.265582	-0.222617	-0.165833	-0.0215818	0.154724	0.334342	0.472612	0.602279	0.689633	0.715169	0.719615	0.689952	0.625036	0.468015	0.213112	-0.000345486	-0.105458	-0.0483539	0.135237	0.380536	0.567045	0.65336	0.634042	0.584349	0.572956	0.637519	0.719876	0.777152	0.732462	0.579383	0.407913	0.313171	0.33163	0.378839	0.397959	0.312598	0.159651	0.0229665	-0.105016
-0.0374356	0.158939	0.332596	0.491884	0.617462	0.737939	0.823946	0.849088	0.853465	0.82426	0.760345	0.605746	0.354775	0.14461	0.0411192	0.0973425	0.278101	0.519616	0.703249	0.788232	0.769213	0.720286	0.709069	0.772636	0.853722	0.910115	0.866114	0.715397	0.546571	0.453291	0.471465	0.517946	0.536771	0.452727	0.302139	0.167563	0.0415547	-0.0752798	-0.186363	-0.25758	-0.250319	-0.15333	0.0525609	0.294437	0.495837	0.641603	0.704194	0.674159	0.539027	0.326815
0.43317	0.453869	0.439924	0.403644	0.354782	0.237193	0.0726232	-0.151103	-0.28847	-0.36502	-0.342515	-0.221058	-0.00952493	0.263695	0.551152	0.81948	0.928338	0.912409	0.802027	0.606672	0.390865	0.265319	0.246608	0.323361	0.479124	0.625924	0.640961	0.496274	0.242889	0.080381	0.0326676	0.118689	0.29174	0.428968	0.501523	0.500718	0.499501	0.513976	0.48555	0.316211	0.00544452	-0.365013	-0.658976	-0.786168	-0.764409	-0.625265	-0.404495	-0.121961	0.0861203	0.155401
0.583012	0.818705	1.03687	1.11081	1.07394	0.961538	0.758345	0.533878	0.403296	0.383833	0.463667	0.62568	0.778369	0.79401	0.643517	0.379965	0.210937	0.161309	0.250782	0.430777	0.573511	0.648977	0.648139	0.646873	0.66193	0.632363	0.456229	0.132993	-0.252329	-0.558086	-0.690383	-0.66775	-0.523023	-0.293394	0.000475785	0.216906	0.288967	0.190813	-0.0634305	-0.351582	-0.595756	-0.686503	-0.637928	-0.529072	-0.383259	-0.316987	-0.383825	-0.483851	-0.552175	-0.489161
0.769004	0.703326	0.555	0.384988	0.288028	0.278358	0.355598	0.512347	0.660076	0.675208	0.529605	0.274616	0.11108	0.0630641	0.14963	0.323777	0.461874	0.534888	0.534077	0.532852	0.54742	0.518814	0.348402	0.0356687	-0.337134	-0.632957	-0.760955	-0.739058	-0.599033	-0.376865	-0.0925433	0.116855	0.186575	0.09161	-0.154373	-0.433162	-0.669403	-0.757202	-0.710204	-0.604885	-0.46381	-0.399692	-0.464358	-0.561134	-0.627238	-0.566271	-0.404347	-0.262398	-0.190252	-0.21495
-0.913807	-0.907352	-0.848062	-0.768812	-0.642088	-0.451239	-0.241377	-0.0767408	0.0437506	0.114738	0.0919697	-0.0477302	-0.269064	-0.443987	-0.410234	-0.232673	-0.000703651	0.136624	0.169743	0.0806583	-0.0906596	-0.238058	-0.314285	-0.230603	-0.0528819	0.259827	0.557143	0.811719	0.952188	0.995306	0.950162	0.769168	0.543813	0.418067	0.45628	0.534502	0.566709	0.460869	0.229937	-0.0881591	-0.326203	-0.453038	-0.444109	-0.412577	-0.263332	0.0200847	0.276215	0.516802	0.654751	0.699117
0.363719	0.0602239	-0.212117	-0.391383	-0.353505	-0.173702	0.0553165	0.190898	0.223596	0.135644	-0.0334954	-0.17902	-0.254277	-0.171659	0.00380181	0.312534	0.606068	0.857407	0.996089	1.03866	0.994089	0.815397	0.592908	0.468761	0.506488	0.583716	0.615513	0.511018	0.283024	-0.0310267	-0.266044	-0.391265	-0.38245	-0.351318	-0.203972	0.0758404	0.328714	0.56624	0.702435	0.746237	0.633443	0.44316	0.231326	0.0656407	-0.0934008	-0.274891	-0.478142	-0.72511	-0.847413	-0.848675
0.42714	0.404678	0.383815	0.327672	0.285135	0.215951	0.148913	0.0982549	0.0914634	0.0504034	0.0230719	0.0266049	0.083351	0.168272	0.26582	0.372954	0.454619	0.572556	0.617759	0.635988	0.593467	0.564921	0.51823	0.454344	0.362302	0.234647	0.116629	0.000488184	-0.120037	-0.255606	-0.34284	-0.349321	-0.255437	-0.128391	0.0282023	0.120241	0.0922355	-0.0510359	-0.175494	-0.204358	-0.0800354	0.159478	0.376421	0.465824	0.432582	0.326058	0.285696	0.349218	0.493159	0.645476
0.61945	0.722474	0.735745	0.730284	0.677436	0.643366	0.593886	0.526184	0.428643	0.293362	0.168294	0.0452143	-0.082511	-0.226179	-0.318625	-0.325493	-0.226	-0.0913647	0.074584	0.172121	0.142443	-0.00938792	-0.141281	-0.171869	-0.0401198	0.213702	0.443606	0.538349	0.503122	0.390233	0.347461	0.414778	0.567317	0.728734	0.810005	0.834284	0.772705	0.635064	0.399386	0.200062	0.0255354	-0.0268702	0.0280821	0.144831	0.277514	0.355355	0.373578	0.308596	0.173554	0.0210362
-0.0807039	-0.0741568	-0.113773	-0.179146	-0.269593	-0.331574	-0.309819	-0.255191	-0.123055	0.0352855	0.205987	0.34863	0.394144	0.331002	0.150323	-0.026014	-0.161619	-0.167857	-0.141655	-0.0666134	0.0378677	0.201658	0.364205	0.468973	0.467597	0.398627	0.344637	0.355608	0.4242	0.505059	0.496447	0.348956	0.117258	-0.130031	-0.312057	-0.417568	-0.399154	-0.272429	-0.0921108	0.0191877	0.0198867	-0.109989	-0.295674	-0.432153	-0.51743	-0.565195	-0.567149	-0.526363	-0.449689	-0.287183
-0.20441	-0.113952	0.0483987	0.208011	0.316146	0.305819	0.226533	0.164467	0.17708	0.25593	0.348885	0.338984	0.169432	-0.0969206	-0.381198	-0.59045	-0.711742	-0.690574	-0.544894	-0.337606	-0.20966	-0.208856	-0.358158	-0.571616	-0.728509	-0.826541	-0.88145	-0.883697	-0.83681	-0.748668	-0.561855	-0.35922	-0.179953	-0.114654	-0.200712	-0.402092	-0.592541	-0.661617	-0.566054	-0.323466	-0.05785	0.1153	0.0357639	-0.198957	-0.47456	-0.667883	-0.719648	-0.658743	-0.525415	-0.341926
0.202615	-0.0872196	-0.36509	-0.582515	-0.667261	-0.66496	-0.567442	-0.404709	-0.265821	-0.165114	-0.102119	-0.0989677	-0.12766	-0.155981	-0.170362	-0.168221	-0.102405	0.0179552	0.161421	0.255227	0.243983	0.133112	-0.0898819	-0.33598	-0.488723	-0.5154	-0.492075	-0.46966	-0.497238	-0.610042	-0.714184	-0.831949	-0.906459	-0.918563	-0.875497	-0.76694	-0.686905	-0.622784	-0.549845	-0.481412	-0.416458	-0.31946	-0.226346	-0.221857	-0.299863	-0.479084	-0.727109	-1.00432	-1.22035	-1.39881
1.57123	1.20843	0.846502	0.529176	0.328013	0.227009	0.185102	0.172945	0.182381	0.190236	0.228855	0.338073	0.413013	0.466113	0.515984	0.559917	0.635839	0.720708	0.798962	0.854758	0.883159	0.906969	0.993894	1.08657	1.09456	0.992074	0.81123	0.57766	0.387916	0.230526	0.167731	0.14431	0.191676	0.311243	0.432875	0.558209	0.624807	0.656532	0.62398	0.605751	0.562775	0.589947	0.649605	0.760437	0.922601	1.09307	1.25613	1.3303	1.26	1.10569
0.0454217	0.039826	0.076559	0.189295	0.263964	0.316837	0.370079	0.416982	0.498035	0.588641	0.672184	0.731752	0.762072	0.787492	0.880293	0.979231	0.987764	0.87835	0.685282	0.435923	0.233354	0.0653261	-0.00171333	-0.0267173	0.0238502	0.151499	0.281352	0.415158	0.486258	0.520127	0.485375	0.465913	0.420032	0.449041	0.512732	0.631055	0.804181	0.986177	1.16026	1.23944	1.16438	0.999645	0.69566	0.40846	0.160399	-0.0235671	-0.128769	-0.146509	-0.113039	0.00174155
-0.277082	-0.19445	-0.0599679	0.10733	0.220986	0.333751	0.372772	0.368999	0.393005	0.468951	0.624859	0.789736	0.907829	0.90667	0.807555	0.63269	0.439404	0.195354	-0.06356	-0.311356	-0.475225	-0.615842	-0.733694	-0.832517	-0.809303	-0.658505	-0.451778	-0.299663	-0.28683	-0.377378	-0.552033	-0.706271	-0.817574	-0.790665	-0.685884	-0.589911	-0.564055	-0.579973	-0.582681	-0.508464	-0.329898	-0.0777244	0.228148	0.546865	0.826076	0.981469	0.935411	0.713522	0.429908	0.244502
0.0746023	-0.0612056	-0.22635	-0.398889	-0.587357	-0.736943	-0.839273	-0.814533	-0.718199	-0.629962	-0.606191	-0.620826	-0.623316	-0.555082	-0.390911	-0.159066	0.122148	0.415172	0.671874	0.81474	0.772395	0.568394	0.307644	0.137183	0.0262503	-0.0324995	-0.151932	-0.330492	-0.521826	-0.609652	-0.534265	-0.393723	-0.144594	0.149752	0.512089	0.73324	0.711273	0.443359	0.0572057	-0.32936	-0.507901	-0.526059	-0.384253	-0.268449	-0.23157	-0.294759	-0.350734	-0.392962	-0.386637	-0.430847
-0.527257	-0.292099	-0.0707657	0.132555	0.267172	0.338216	0.364116	0.268731	0.101749	-0.0462529	-0.0638886	0.0838581	0.276522	0.441212	0.522998	0.535036	0.560752	0.676097	0.835331	0.951708	0.934478	0.80631	0.689338	0.640648	0.704312	0.800766	0.857133	0.85505	0.754273	0.663033	0.618044	0.678029	0.78311	0.901172	0.937679	0.872581	0.731701	0.510644	0.275027	0.0310922	-0.117624	-0.158983	-0.0973838	0.0158246	0.191916	0.387468	0.565502	0.69905	0.767582	0.757042
0.508837	0.476739	0.442007	0.366465	0.252224	0.132007	-0.00306819	-0.0676925	-0.0598727	0.0617795	0.244798	0.335559	0.299983	0.103207	-0.104808	-0.237323	-0.285646	-0.278366	-0.210155	-0.124082	0.0189279	0.232371	0.482565	0.728256	0.902802	0.999973	0.948969	0.797281	0.655105	0.608702	0.637305	0.702065	0.706556	0.617056	0.421464	0.113734	-0.14501	-0.275628	-0.279494	-0.292031	-0.388152	-0.601569	-0.940969	-1.26108	-1.48554	-1.5532	-1.46043	-1.30402	-1.11527	-0.9966
0.203133	0.257946	0.379698	0.509133	0.558689	0.525104	0.424613	0.289753	0.113355	-0.0529433	-0.173333	-0.166648	-0.121258	-0.00171753	0.126326	0.268779	0.422203	0.577013	0.821089	1.02094	1.11959	1.05741	0.865841	0.649855	0.457004	0.33328	0.276224	0.320452	0.341818	0.315538	0.14738	-0.0707286	-0.287099	-0.402474	-0.345996	-0.156929	0.0630573	0.2488	0.373585	0.456107	0.48969	0.434472	0.313959	0.157317	0.0451482	0.0907957	0.240372	0.430045	0.55328	0.547476
0.458231	0.254583	0.141939	0.111574	0.149931	0.201084	0.187925	0.127087	0.0984792	0.14619	0.224988	0.333487	0.440997	0.532884	0.642192	0.726192	0.72474	0.606374	0.456988	0.325781	0.247734	0.242798	0.27839	0.287579	0.16934	-0.0460687	-0.284553	-0.452737	-0.495002	-0.361069	-0.0806107	0.24576	0.459505	0.53116	0.408166	0.114606	-0.228864	-0.56158	-0.784242	-0.934166	-1.00005	-1.02266	-0.979353	-0.903027	-0.826616	-0.837424	-0.885836	-0.945508	-0.837241	-0.5427
0.420596	0.184798	-0.137658	-0.469601	-0.791086	-1.01192	-1.16789	-1.23644	-1.25996	-1.2149	-1.1355	-1.056	-1.06725	-1.11761	-1.17969	-1.06706	-0.760631	-0.332168	0.0506153	0.244212	0.119601	-0.23841	-0.630001	-0.846658	-0.78308	-0.525769	-0.183623	0.0631132	0.138744	0.125535	0.0805444	0.0837306	0.099073	0.110143	0.157618	0.148758	0.0559942	-0.094873	-0.237302	-0.346203	-0.384709	-0.377684	-0.382876	-0.471345	-0.646466	-0.808095	-0.888485	-0.837263	-0.727769	-0.672781
0.347934	0.380333	0.359551	0.288093	0.212731	0.149148	0.167321	0.270594	0.460403	0.649562	0.84788	0.954267	0.943791	0.821317	0.645195	0.49517	0.374931	0.26806	0.187372	0.178958	0.190004	0.18777	0.139329	0.110376	0.147166	0.184969	0.216583	0.18476	0.103333	0.103193	0.13614	0.165228	0.162514	0.122855	0.0273517	-0.0762569	-0.207584	-0.345054	-0.460372	-0.558945	-0.611772	-0.670099	-0.742007	-0.822218	-0.913848	-0.989733	-0.993867	-0.932304	-0.854237	-0.743446
-0.339414	-0.206628	0.047146	0.386103	0.651752	0.754788	0.646201	0.478417	0.331214	0.194461	0.0564267	-0.00196086	0.0392749	0.19811	0.443858	0.715169	0.951771	1.08349	1.1558	1.2519	1.35831	1.42882	1.3996	1.17715	0.841733	0.529108	0.358307	0.366051	0.505368	0.591143	0.557283	0.458592	0.415123	0.53462	0.712118	0.785546	0.797068	0.803775	0.795128	0.915937	1.04096	1.08592	0.929184	0.650251	0.357241	0.115829	-0.0494219	-0.0773199	-0.0148283	0.0369563
0.648072	0.732228	0.86018	0.91936	0.94169	0.884895	0.745279	0.582848	0.42292	0.264723	0.136397	0.0041161	-0.109963	-0.152481	-0.141627	-0.0170672	0.196141	0.355553	0.519444	0.568582	0.503179	0.347406	0.189587	-0.0268183	-0.274206	-0.567314	-0.824747	-1.01934	-1.13401	-1.07425	-0.901173	-0.669273	-0.460612	-0.292791	-0.178273	-0.0634674	0.0402889	0.0999172	0.0549461	-0.0327559	-0.211168	-0.425327	-0.707944	-0.998477	-1.19197	-1.29158	-1.24712	-1.10222	-0.978056	-0.944375
-0.166526	-0.140034	-0.103149	-0.0309863	0.0542253	0.10471	0.063529	-0.0167808	-0.180155	-0.376263	-0.635059	-0.901104	-1.07829	-1.16951	-1.12879	-0.996107	-0.882404	-0.851562	-0.869729	-0.925791	-0.959248	-0.907719	-0.790906	-0.641812	-0.489784	-0.334603	-0.195848	-0.102606	-0.107496	-0.220232	-0.43451	-0.653676	-0.793875	-0.865992	-0.770329	-0.596358	-0.419829	-0.305001	-0.29237	-0.316932	-0.360534	-0.35985	-0.325915	-0.298025	-0.319526	-0.266365	-0.151614	0.00276356	0.138038	0.149243
0.772241	0.581545	0.418036	0.28568	0.246408	0.365795	0.51979	0.673351	0.714286	0.617929	0.452757	0.362185	0.377785	0.451534	0.575167	0.670336	0.696789	0.645877	0.49589	0.282009	0.0695606	-0.0664736	-0.10936	-0.104759	-0.101614	-0.127516	-0.131251	-0.08927	-0.0100593	0.096331	0.213868	0.317458	0.373536	0.39715	0.338788	0.286117	0.271261	0.327109	0.387815	0.396483	0.34022	0.255898	0.175835	0.0584284	-0.150797	-0.399441	-0.592487	-0.708692	-0.671446	-0.542356
0.491406	0.413889	0.269719	0.0740807	-0.120972	-0.245893	-0.28849	-0.283919	-0.280796	-0.306522	-0.310232	-0.268535	-0.189861	-0.0841908	0.0325504	0.13544	0.191137	0.214592	0.156625	0.10431	0.0895553	0.145025	0.20532	0.213929	0.158047	0.0742957	-0.00522541	-0.121837	-0.329646	-0.576607	-0.768346	-0.883764	-0.84677	-0.718555	-0.529925	-0.3503	-0.238268	-0.183057	-0.146965	-0.180859	-0.243088	-0.37034	-0.468768	-0.544122	-0.52593	-0.459458	-0.38337	-0.364357	-0.368195	-0.400165
-0.170897	-0.233534	-0.303634	-0.327972	-0.290807	-0.21619	-0.112988	0.00102564	0.101511	0.155908	0.178814	0.122201	0.0711091	0.0566989	0.110873	0.16976	0.178167	0.123591	0.0417958	-0.0358677	-0.149755	-0.35271	-0.593902	-0.781161	-0.893884	-0.857754	-0.732534	-0.548311	-0.372881	-0.263467	-0.209545	-0.174297	-0.207399	-0.268174	-0.392453	-0.488582	-0.562175	-0.544409	-0.47949	-0.405179	-0.38661	-0.390358	-0.421582	-0.470405	-0.506104	-0.522983	-0.548797	-0.599373	-0.58968	-0.54526
-1.08357	-0.86185	-0.593695	-0.336631	-0.200343	-0.170849	-0.22122	-0.317515	-0.447564	-0.67464	-0.92839	-1.19098	-1.35237	-1.28516	-1.04021	-0.694073	-0.409576	-0.259445	-0.296823	-0.437859	-0.586274	-0.713963	-0.705381	-0.57611	-0.411224	-0.294657	-0.321332	-0.461723	-0.659335	-0.760787	-0.730246	-0.541837	-0.196753	0.166606	0.473068	0.59099	0.462193	0.028772	-0.474815	-0.885811	-1.03798	-0.91625	-0.596586	-0.212527	0.0424038	0.0989894	0.0383241	-0.0240705	-0.0313693	-0.0740468
-0.880988	-0.848132	-0.735844	-0.518163	-0.202329	0.128021	0.347945	0.396761	0.344426	0.290599	0.284303	0.247486	0.185988	0.0125559	-0.153789	-0.276227	-0.31879	-0.274095	-0.245917	-0.23394	-0.299819	-0.394615	-0.517315	-0.616436	-0.672683	-0.62236	-0.504333	-0.300572	-0.155158	-0.0885996	-0.0610963	-0.026089	0.0150227	0.0816692	0.173837	0.269502	0.41992	0.554859	0.579739	0.452034	0.152993	-0.268767	-0.609006	-0.847092	-0.91044	-0.886745	-0.799445	-0.630535	-0.417874	-0.212711
0.652661	0.698589	0.708347	0.659179	0.561441	0.446502	0.36867	0.255991	0.163964	0.0959892	0.0201218	-0.0790059	-0.175623	-0.249706	-0.281776	-0.231676	-0.130274	-0.0515001	-0.0501785	-0.08222	-0.0622108	0.048292	0.214448	0.308044	0.299838	0.18171	0.0744709	-0.00201579	-0.0414276	-0.0763294	-0.0724821	-0.0378881	0.0607949	0.230821	0.355908	0.356729	0.190087	-0.0591833	-0.241416	-0.346644	-0.342159	-0.259381	-0.202595	-0.15569	-0.142521	-0.0165979	0.182768	0.349422	0.357431	0.202334
0.545333	0.476123	0.292789	0.0897943	-0.093652	-0.224513	-0.260284	-0.241288	-0.155376	-0.049059	0.0436006	0.139469	0.258854	0.399191	0.479178	0.485595	0.420647	0.335411	0.211362	0.0385675	-0.167278	-0.359147	-0.492676	-0.549009	-0.519418	-0.545275	-0.623815	-0.658192	-0.597259	-0.44843	-0.267344	-0.0881087	0.0667635	0.231915	0.414933	0.580532	0.676848	0.663631	0.542702	0.350585	0.173124	-0.000881634	-0.123491	-0.183712	-0.164915	-0.0275597	0.14853	0.323543	0.419533	0.430659
0.168228	0.164336	0.230548	0.361263	0.493346	0.576138	0.56354	0.448274	0.265154	0.0960042	-0.0698522	-0.186719	-0.24412	-0.226203	-0.0952808	0.0725621	0.239378	0.330873	0.341478	0.330665	0.41282	0.549888	0.701239	0.725267	0.559036	0.259795	-0.103499	-0.327694	-0.433069	-0.374306	-0.253223	-0.113036	-0.0315272	0.0396119	0.118336	0.202814	0.275239	0.270059	0.194942	0.0198747	-0.172986	-0.335417	-0.41945	-0.405889	-0.292878	-0.110559	0.044184	0.119858	0.0429154	-0.14611
-0.539097	-0.396097	-0.268142	-0.144774	-0.0728815	-0.00371854	0.0844591	0.179082	0.260205	0.254402	0.170265	-0.0258259	-0.241847	-0.423784	-0.517908	-0.502719	-0.376136	-0.171923	0.00140262	0.086164	-1.83663e-05	-0.211743	-0.488291	-0.757737	-0.941295	-1.00724	-1.04577	-1.06376	-1.0573	-0.986656	-0.824938	-0.598924	-0.374289	-0.200529	-0.144915	-0.101532	-0.0192591	0.0848573	0.15242	0.212448	0.262764	0.379991	0.589413	0.858543	1.10822	1.20751	1.19383	1.07203	0.936359	0.800079
-0.605387	-0.647072	-0.727614	-0.843889	-0.951842	-0.992245	-0.936685	-0.854743	-0.778339	-0.795994	-0.812911	-0.789341	-0.755659	-0.705175	-0.655063	-0.66923	-0.754356	-0.872322	-0.976997	-1.03016	-1.10694	-1.16634	-1.21996	-1.27802	-1.35845	-1.40094	-1.43435	-1.36809	-1.23439	-1.03689	-0.753523	-0.479247	-0.246388	-0.147956	-0.183829	-0.337965	-0.497014	-0.645571	-0.712263	-0.711703	-0.71962	-0.652539	-0.538045	-0.445827	-0.419943	-0.494168	-0.651916	-0.80478	-0.93508	-0.997133
-0.544424	-0.497209	-0.41532	-0.347351	-0.292475	-0.298181	-0.282551	-0.134847	0.146115	0.489039	0.768482	0.91854	0.947303	0.896017	0.842582	0.777196	0.647142	0.468693	0.207118	0.00450384	-0.0773127	-0.000885686	0.105181	0.184944	0.177533	0.144484	0.183338	0.346265	0.564399	0.747687	0.897062	0.926887	0.84642	0.756823	0.734157	0.735924	0.593395	0.356864	0.0659302	-0.131255	-0.16981	-0.0757629	0.0881017	0.26155	0.376076	0.419647	0.509658	0.546093	0.473757	0.223501
0.268379	0.233257	0.173548	0.126134	0.165627	0.337109	0.555138	0.738337	0.887641	0.91745	0.837023	0.747469	0.724814	0.72658	0.58412	0.347703	0.0569091	-0.140181	-0.178717	-0.0847157	0.0790699	0.252435	0.366905	0.410455	0.500423	0.53684	0.464539	0.214404	-0.0985954	-0.33796	-0.385811	-0.197979	0.135494	0.44103	0.642431	0.650088	0.508205	0.285664	0.129247	0.0472675	0.0911467	0.229483	0.439496	0.626914	0.824871	1.03184	1.21653	1.3078	1.1851	0.848711
0.518358	0.369051	0.19178	-0.00716844	-0.132115	-0.198505	-0.160535	-0.0408284	0.140901	0.303079	0.474376	0.65347	0.813286	0.892264	0.786096	0.495006	0.12471	-0.182395	-0.373879	-0.45588	-0.505643	-0.502844	-0.43689	-0.278847	-0.103396	0.0747551	0.158871	0.152745	0.126983	0.167284	0.369547	0.597748	0.705592	0.599726	0.361183	0.0317536	-0.184212	-0.260687	-0.244653	-0.227415	-0.297527	-0.430568	-0.576753	-0.611158	-0.544131	-0.471319	-0.498081	-0.582828	-0.668576	-0.710558
-1.16047	-0.982481	-0.68926	-0.345183	0.0196119	0.208558	0.160341	-0.0564527	-0.374239	-0.612365	-0.810973	-0.886875	-0.864909	-0.751941	-0.661451	-0.64603	-0.761406	-0.892557	-0.915628	-0.879793	-0.731688	-0.574857	-0.433887	-0.369924	-0.356163	-0.318258	-0.216119	-0.0418263	0.196996	0.449735	0.650189	0.691219	0.6315	0.451552	0.225145	0.0395734	-0.0027377	0.119898	0.293261	0.341449	0.21614	-0.0724156	-0.371904	-0.583482	-0.713339	-0.740276	-0.764523	-0.779657	-0.750363	-0.753623
0.192921	0.0866706	0.0161248	0.0197279	0.0954914	0.247165	0.458059	0.681241	0.858254	0.894485	0.84175	0.682846	0.482915	0.319046	0.281682	0.389976	0.543066	0.585619	0.474964	0.220153	-0.0443123	-0.231148	-0.345818	-0.369605	-0.391017	-0.404381	-0.378513	-0.381391	-0.386112	-0.418816	-0.50408	-0.580194	-0.552163	-0.366677	0.00485839	0.434421	0.783449	0.93903	0.819146	0.495939	0.142882	-0.121819	-0.266658	-0.230631	-0.0920185	0.106105	0.327557	0.521135	0.698997	0.843804
-0.261855	-0.385832	-0.474542	-0.450736	-0.26844	0.0866101	0.505035	0.845014	0.99656	0.879785	0.564958	0.221056	-0.0367832	-0.177867	-0.142773	-0.007755	0.185231	0.400942	0.589501	0.762752	0.903804	0.954993	0.992777	1.0724	1.10739	1.11859	1.12267	1.07147	0.940471	0.686352	0.377206	0.100516	-0.0672197	-0.0687701	0.0571713	0.13649	0.155456	0.0645066	-0.058815	-0.093762	0.0208714	0.242594	0.498886	0.629319	0.556583	0.382362	0.17708	0.114326	0.18594	0.413551
-0.221712	-0.11559	-0.0415781	-0.113011	-0.263593	-0.430439	-0.508061	-0.451683	-0.321766	-0.161317	-0.0411219	-0.0479637	-0.171148	-0.342759	-0.469394	-0.404461	-0.180152	0.0900318	0.27694	0.306805	0.0834991	-0.28335	-0.667571	-0.955498	-1.04352	-0.892962	-0.574997	-0.216007	0.119792	0.334648	0.402497	0.321604	0.125983	-0.0774674	-0.258691	-0.348981	-0.313326	-0.24362	-0.197216	-0.196159	-0.193226	-0.252244	-0.364521	-0.54983	-0.756368	-0.937392	-1.14781	-1.27513	-1.2771	-1.18224
0.159981	0.0274688	-0.0998136	-0.228152	-0.288515	-0.241368	-0.168246	-0.119568	-0.118459	-0.115383	-0.177293	-0.295073	-0.489463	-0.706123	-0.896018	-1.11675	-1.25031	-1.25237	-1.15286	-0.926162	-0.624924	-0.282285	0.0599034	0.230999	0.248496	0.125389	-0.0228171	-0.128144	-0.180595	-0.150523	-0.103913	-0.0315006	0.069513	0.171362	0.237821	0.228537	0.116362	-0.0550821	-0.24124	-0.380306	-0.48801	-0.562129	-0.601352	-0.585161	-0.578071	-0.590404	-0.605536	-0.577259	-0.539296	-0.437007
0.364011	0.328477	0.373385	0.405629	0.426425	0.408175	0.356576	0.211086	-0.0310998	-0.339842	-0.656697	-0.841925	-0.866521	-0.72006	-0.411828	-0.0666358	0.209649	0.397963	0.441148	0.410816	0.284145	0.0738347	-0.131183	-0.299894	-0.417166	-0.491985	-0.460417	-0.354466	-0.189764	-0.0466248	0.0102117	0.0126566	0.0386387	0.0898475	0.193401	0.250879	0.135647	-0.118964	-0.445798	-0.74414	-0.906441	-0.910359	-0.81024	-0.606817	-0.436096	-0.341861	-0.343937	-0.399458	-0.442192	-0.455957
-0.706007	-0.639693	-0.60316	-0.600705	-0.54123	-0.43298	-0.279883	-0.14683	-0.0939989	-0.0917263	-0.067575	-0.0199746	0.0762818	0.12971	0.0225972	-0.214072	-0.517876	-0.795195	-0.94606	-0.949702	-0.856638	-0.667549	-0.508858	-0.421263	-0.423193	-0.474802	-0.514524	-0.527319	-0.45742	-0.333167	-0.136739	0.0216941	0.112712	0.0980433	0.00247282	-0.146999	-0.296639	-0.442703	-0.564751	-0.647411	-0.657141	-0.6165	-0.546222	-0.443576	-0.34595	-0.261846	-0.220134	-0.235526	-0.259405	-0.322099
0.273188	0.189161	0.0861212	-0.0109935	-0.0266327	0.13886	0.444126	0.781194	1.0108	0.990744	0.847889	0.597848	0.394152	0.223007	0.14091	0.176315	0.359264	0.556826	0.674814	0.698954	0.573434	0.398313	0.326354	0.388415	0.556352	0.69639	0.72729	0.671001	0.628341	0.58454	0.546646	0.472814	0.381123	0.259945	0.131086	0.0259678	0.000275209	0.123968	0.31735	0.483217	0.541763	0.446762	0.312179	0.168359	0.0363936	-0.134173	-0.374513	-0.640636	-0.832338	-0.884925
-0.148681	-0.210389	-0.253563	-0.246006	-0.134916	0.0277558	0.16271	0.210345	0.133049	0.0235484	-0.0934683	-0.200839	-0.339618	-0.535166	-0.751692	-0.907667	-0.950453	-0.860316	-0.646602	-0.435653	-0.269856	-0.171675	-0.142833	-0.122135	-0.101945	-0.0516643	0.00804082	0.0510093	0.0670992	0.0236178	-0.0155591	-0.000700479	0.0554487	0.120197	0.191922	0.246149	0.252535	0.191413	0.135905	0.0672533	-0.0952945	-0.300201	-0.458854	-0.553515	-0.533737	-0.367563	-0.104217	0.187878	0.440182	0.557459
0.282136	0.133979	0.0597902	0.0424453	0.0888926	0.162032	0.187421	0.0979406	-0.0808571	-0.270755	-0.461724	-0.605819	-0.655182	-0.610167	-0.538004	-0.438437	-0.382381	-0.403484	-0.451534	-0.486052	-0.386242	-0.255192	-0.178499	-0.237322	-0.419725	-0.605771	-0.671425	-0.591171	-0.408396	-0.22864	-0.0823534	-0.0457737	-0.118251	-0.33588	-0.575756	-0.790657	-0.862404	-0.739037	-0.478268	-0.248015	-0.157408	-0.185051	-0.369701	-0.571055	-0.7491	-0.840735	-0.853182	-0.783665	-0.632402	-0.488701
0.23452	-0.0809456	-0.392548	-0.616106	-0.688068	-0.601919	-0.410017	-0.221285	-0.0676933	-0.029287	-0.105383	-0.333881	-0.585734	-0.811367	-0.886697	-0.757169	-0.483378	-0.241627	-0.146496	-0.175519	-0.36939	-0.580799	-0.767734	-0.863946	-0.877014	-0.804025	-0.645209	-0.494332	-0.355385	-0.227266	-0.155159	-0.145514	-0.191653	-0.372987	-0.656697	-0.920703	-1.11222	-1.16425	-1.18024	-1.16364	-1.15315	-1.10101	-0.987566	-0.838633	-0.639326	-0.433095	-0.240084	-0.273657	-0.523415	-0.901878
-0.922937	-1.02144	-1.09074	-1.09321	-0.992387	-0.804222	-0.56614	-0.377523	-0.236662	-0.0949046	0.0544827	0.286933	0.499315	0.659358	0.691947	0.587982	0.377635	0.169501	0.0016701	-0.100668	-0.147393	-0.125691	-0.0030105	0.179041	0.387587	0.545187	0.666846	0.725369	0.759514	0.824901	0.911767	1.05735	1.19486	1.28908	1.29256	1.21055	1.0218	0.798646	0.574455	0.445345	0.340648	0.231068	0.161549	0.0686367	-0.00386277	-0.0612012	-0.064261	-0.0651823	-0.0649522	-0.0636158
0.57143	0.338246	0.158612	0.026034	-0.0556148	-0.0978093	-0.0772505	0.0389656	0.211424	0.408981	0.558276	0.673525	0.728964	0.76131	0.823252	0.905541	1.04345	1.17372	1.26297	1.26627	1.18858	1.00977	0.79838	0.586002	0.463696	0.364516	0.26071	0.194854	0.106837	0.0381582	-0.0161589	-0.0190574	-0.0199302	-0.0197122	-0.0184462	0.0382777	0.144381	0.326874	0.462935	0.545535	0.54734	0.490021	0.401995	0.260661	0.110559	-0.0516185	-0.264289	-0.459776	-0.629244	-0.801227
-0.904457	-0.795683	-0.704853	-0.63518	-0.533469	-0.451595	-0.332208	-0.235819	-0.157265	-0.166517	-0.245394	-0.431407	-0.632	-0.807518	-0.836649	-0.743925	-0.601441	-0.491499	-0.517602	-0.616296	-0.769668	-0.904272	-1.00028	-0.970342	-0.794608	-0.553732	-0.344009	-0.194536	-0.16989	-0.251009	-0.348903	-0.433831	-0.485797	-0.506904	-0.463321	-0.33567	-0.201479	-0.130549	-0.15255	-0.234623	-0.361135	-0.434951	-0.365085	-0.218392	-0.100216	-0.0976225	-0.204841	-0.400478	-0.536859	-0.557081
-0.261282	-0.309449	-0.262568	-0.180306	-0.0950069	0.0196474	0.0722244	0.0141609	-0.196505	-0.559632	-0.936407	-1.20766	-1.15863	-0.789036	-0.268396	0.111051	0.206713	0.0301922	-0.222411	-0.377286	-0.405208	-0.343326	-0.259603	-0.224569	-0.247173	-0.263297	-0.203011	-0.0923641	0.0317853	0.135867	0.185737	0.194117	0.219075	0.261218	0.294181	0.230629	0.099108	-0.0360973	-0.0907491	-0.104081	-0.0604445	-0.0674885	-0.16083	-0.309668	-0.452717	-0.520361	-0.495193	-0.452124	-0.446629	-0.419145
-0.354545	-0.204889	-0.0730367	0.0429257	0.133585	0.17337	0.180871	0.203212	0.240935	0.27044	0.213553	0.0958264	-0.0251985	-0.0741185	-0.0860518	-0.0469923	-0.0532974	-0.136849	-0.270077	-0.398124	-0.458673	-0.436144	-0.397593	-0.392674	-0.368072	-0.406749	-0.475824	-0.529858	-0.564824	-0.514909	-0.410961	-0.267281	-0.137286	-0.0867417	-0.131979	-0.18423	-0.282244	-0.382228	-0.480973	-0.593407	-0.755652	-0.995624	-1.14871	-1.09425	-0.808512	-0.377502	0.0614092	0.309173	0.378868	0.283195
-0.846392	-0.725315	-0.613446	-0.494936	-0.41733	-0.398108	-0.373273	-0.412316	-0.482048	-0.536595	-0.571893	-0.521504	-0.416569	-0.271525	-0.140295	-0.0892706	-0.134938	-0.187684	-0.286629	-0.387563	-0.487245	-0.600748	-0.764533	-1.00678	-1.16132	-1.10635	-0.817895	-0.382792	0.0602871	0.310403	0.38076	0.284179	0.147855	-0.0133482	-0.225849	-0.516259	-0.744707	-0.779585	-0.635907	-0.36434	-0.142288	-0.0681888	-0.107129	-0.138129	-0.08085	0.0423686	0.119878	0.0951172	-0.00075331	-0.188822
-0.222248	-0.265938	-0.337997	-0.357557	-0.38426	-0.351764	-0.269487	-0.137982	0.034795	0.203528	0.328748	0.46168	0.563637	0.65514	0.696036	0.62405	0.463147	0.288954	0.131986	0.0829463	0.183563	0.339567	0.495858	0.573771	0.525101	0.405555	0.305048	0.317565	0.412364	0.512751	0.583609	0.606661	0.593685	0.528128	0.460916	0.423117	0.404742	0.422633	0.410539	0.390256	0.319356	0.15904	-0.0557057	-0.284412	-0.453787	-0.521894	-0.462234	-0.359314	-0.259684	-0.25254
0.825266	0.784306	0.717837	0.57204	0.395435	0.267606	0.282476	0.395095	0.514353	0.598531	0.625916	0.610501	0.53262	0.452773	0.407869	0.386041	0.407295	0.392926	0.368831	0.284604	0.0941512	-0.160961	-0.432659	-0.633872	-0.714783	-0.643908	-0.521641	-0.403283	-0.394796	-0.491654	-0.598172	-0.687914	-0.673774	-0.528439	-0.368413	-0.253693	-0.198456	-0.170401	-0.209739	-0.214369	-0.18248	-0.0992582	0.0338491	0.143119	0.206991	0.250048	0.245814	0.265147	0.291026	0.304758
-0.929957	-0.787359	-0.628945	-0.43463	-0.249935	-0.118437	-0.0926801	-0.110863	-0.0839598	0.0119775	0.164581	0.311769	0.478955	0.507411	0.363575	0.0863512	-0.228038	-0.369824	-0.293663	-0.0561322	0.191822	0.277689	0.183677	0.0539123	-0.0353068	0.00268993	0.138927	0.308419	0.517915	0.654303	0.628087	0.500031	0.301497	0.218138	0.203129	0.239615	0.254311	0.231969	0.171029	0.0567719	-0.0642671	-0.220661	-0.397688	-0.552737	-0.697642	-0.814706	-0.908575	-0.911979	-0.802451	-0.622431
-0.544603	-0.41502	-0.27856	-0.154122	-0.103014	-0.074203	-0.0284817	0.102117	0.257313	0.390526	0.449195	0.444147	0.373395	0.271291	0.13212	0.0637629	0.125088	0.232737	0.308885	0.272696	0.141149	-0.0527004	-0.253626	-0.371478	-0.440387	-0.484711	-0.498352	-0.385292	-0.241313	-0.0957353	-0.0303088	-0.0556184	-0.0844802	-0.154063	-0.163066	-0.102136	0.006595	0.0793219	0.10104	0.0552717	0.0107866	0.00108815	0.0488767	0.129143	0.269044	0.480928	0.718866	0.925527	0.982555	0.930229
-0.549539	-0.573403	-0.562574	-0.542053	-0.547819	-0.511291	-0.398479	-0.192728	0.0388212	0.234767	0.392223	0.442454	0.426428	0.362958	0.30364	0.231015	0.159055	0.104127	0.116517	0.177405	0.250704	0.336789	0.363334	0.340336	0.306933	0.323955	0.328128	0.261195	0.184041	0.100451	0.0119926	-0.0221689	0.0155982	0.0976127	0.187475	0.194475	0.0985113	-0.108697	-0.38411	-0.663315	-0.869218	-0.944497	-0.917772	-0.80509	-0.562302	-0.297422	-0.133528	-0.0807313	-0.152467	-0.324764
0.346611	0.352063	0.352069	0.31919	0.266163	0.219176	0.231524	0.292204	0.365251	0.451041	0.477495	0.454576	0.421287	0.438251	0.44241	0.375706	0.298817	0.215513	0.127358	0.0933134	0.130951	0.212685	0.302239	0.309215	0.21358	0.00708216	-0.267387	-0.545635	-0.750833	-0.825854	-0.79922	-0.686924	-0.444968	-0.180997	-0.0176645	0.0349517	-0.0365382	-0.208244	-0.3648	-0.40867	-0.343376	-0.26748	-0.194567	-0.113751	-0.0392699	0.106684	0.332207	0.623022	0.825463	0.890581
0.538322	0.550207	0.526881	0.451694	0.32427	0.23645	0.247119	0.407111	0.615879	0.774185	0.841178	0.818284	0.727008	0.632698	0.581003	0.550994	0.485713	0.382243	0.202183	-0.0143805	-0.266789	-0.483935	-0.608804	-0.563806	-0.383726	-0.161667	-0.0180331	-0.0155293	-0.129763	-0.25853	-0.332481	-0.301192	-0.255879	-0.263277	-0.264152	-0.205504	-0.0870871	0.0742121	0.209327	0.251826	0.148577	-0.0776833	-0.312789	-0.409277	-0.350252	-0.161993	0.119839	0.405623	0.591423	0.641345
0.0497878	-0.11084	-0.22859	-0.234982	-0.130489	0.0485128	0.226999	0.27947	0.14529	-0.089811	-0.248519	-0.311897	-0.285696	-0.171098	-0.00553679	0.168283	0.278911	0.336108	0.318306	0.226588	0.0591171	-0.0796709	-0.184679	-0.250241	-0.217458	-0.115405	0.0924102	0.327195	0.435542	0.45925	0.377387	0.270286	0.174158	0.153813	0.134362	0.0879916	0.0281453	0.00950496	0.0561516	0.139432	0.209206	0.153189	-0.0988308	-0.421635	-0.744499	-0.948221	-1.0047	-0.98079	-0.861482	-0.658408
0.233131	0.27403	0.303198	0.276774	0.187823	0.0308819	-0.105479	-0.208651	-0.273066	-0.240856	-0.140588	0.0635928	0.294272	0.400724	0.424017	0.343586	0.238358	0.143911	0.123922	0.104811	0.0592515	0.000451782	-0.0178626	0.0279684	0.109792	0.178346	0.123309	-0.124304	-0.441462	-0.758681	-0.95884	-1.01434	-0.990839	-0.873618	-0.674095	-0.418688	-0.138234	0.111913	0.306933	0.451968	0.523487	0.538878	0.480179	0.344841	0.244847	0.16489	0.142308	0.0694457	-0.0537989	-0.201146
0.314964	0.472487	0.556465	0.553823	0.3602	0.094689	-0.149469	-0.230933	-0.180464	-0.0505192	0.0761778	0.137273	0.104487	0.037752	0.0063513	-0.00546147	0.0485472	0.150304	0.24324	0.278614	0.243271	0.199156	0.122942	0.0878948	-0.00797419	-0.132236	-0.276703	-0.316052	-0.220055	0.0103243	0.290297	0.522088	0.647835	0.589134	0.457345	0.335841	0.202179	0.088013	0.00312928	-0.108873	-0.271863	-0.447628	-0.594303	-0.582671	-0.455416	-0.312921	-0.271381	-0.349375	-0.487737	-0.553363
0.107937	-0.0518708	-0.215718	-0.37519	-0.416399	-0.321065	-0.086642	0.198246	0.434106	0.56206	0.502328	0.368226	0.244589	0.108581	-0.00758946	-0.0939632	-0.207931	-0.373783	-0.552633	-0.701883	-0.690047	-0.560558	-0.415561	-0.373293	-0.452655	-0.593447	-0.660224	-0.568152	-0.378326	-0.160288	-0.0111404	0.147239	0.373324	0.597456	0.801533	0.897905	0.784217	0.480853	0.140713	-0.118551	-0.264095	-0.319369	-0.258351	-0.137217	-0.00306753	0.115039	0.20672	0.209989	0.154721	0.0789626
-0.82307	-0.600863	-0.33866	-0.120597	0.109948	0.259131	0.383794	0.440741	0.446748	0.441442	0.412591	0.381314	0.390749	0.497549	0.645351	0.796327	0.829774	0.786513	0.685985	0.638064	0.71489	0.915255	1.1658	1.27959	1.25119	1.14164	1.01942	0.922148	0.830435	0.754998	0.672067	0.626891	0.586397	0.493598	0.376627	0.25588	0.1865	0.200712	0.311436	0.451084	0.604224	0.735129	0.910468	1.07517	1.17987	1.16679	1.04752	0.779496	0.462737	0.199109
-0.8286	-0.888046	-0.854643	-0.700836	-0.502333	-0.345314	-0.27647	-0.328712	-0.446226	-0.553314	-0.622084	-0.625573	-0.56806	-0.488571	-0.438616	-0.416005	-0.502919	-0.620867	-0.742959	-0.85455	-0.979101	-1.03231	-0.990279	-0.847779	-0.704638	-0.646955	-0.590508	-0.586677	-0.622028	-0.66304	-0.702613	-0.807885	-0.951784	-1.04344	-1.04983	-0.985223	-0.91287	-0.759846	-0.617628	-0.56999	-0.60919	-0.673029	-0.739027	-0.73451	-0.683881	-0.554787	-0.405508	-0.22645	-0.0355537	0.202462
-0.192838	-0.150559	-0.142588	-0.166371	-0.261828	-0.39097	-0.49422	-0.560526	-0.563891	-0.508438	-0.431797	-0.383632	-0.361832	-0.445631	-0.559353	-0.677071	-0.784663	-0.904752	-0.95605	-0.915529	-0.778135	-0.640122	-0.584507	-0.530082	-0.526388	-0.560472	-0.600015	-0.63817	-0.739671	-0.878414	-0.966784	-0.972947	-0.910654	-0.840894	-0.693352	-0.55623	-0.510299	-0.548095	-0.609646	-0.673279	-0.668924	-0.620109	-0.495641	-0.351711	-0.179068	0.00498832	0.234476	0.342188	0.249632	0.0212169
-0.712967	-0.432883	-0.222987	-0.0991124	-0.0703062	-0.13898	-0.202969	-0.19088	-0.0598691	0.126122	0.355961	0.469246	0.440661	0.302473	0.0921954	-0.114455	-0.257699	-0.3181	-0.32368	-0.258257	-0.117337	0.0194387	0.0797197	0.00320796	-0.157389	-0.273985	-0.271042	-0.208276	-0.114538	-0.0811586	-0.0746532	-0.115319	-0.185563	-0.208578	-0.230855	-0.212436	-0.228281	-0.244476	-0.242515	-0.244205	-0.318469	-0.413233	-0.514779	-0.59619	-0.589631	-0.455151	-0.223025	0.035231	0.232503	0.298311
-1.2916	-1.24173	-1.11616	-0.890496	-0.610196	-0.324351	-0.0841894	0.0496668	0.0900881	0.0644125	-0.0214268	-0.134154	-0.251636	-0.365514	-0.332252	-0.220082	-0.0980556	-0.0585178	-0.0835808	-0.126253	-0.218639	-0.296556	-0.350056	-0.419553	-0.453129	-0.475648	-0.468913	-0.491199	-0.487468	-0.404172	-0.268601	-0.0715481	0.101396	0.181864	0.169283	0.0173806	-0.253783	-0.475619	-0.610717	-0.545476	-0.349355	-0.110813	0.0444775	0.0180038	-0.174916	-0.406427	-0.533809	-0.564041	-0.419511	-0.093432
0.512699	0.484278	0.403435	0.336609	0.325586	0.435119	0.656817	0.884124	1.09061	1.26936	1.36924	1.40349	1.32094	1.12233	0.864816	0.685973	0.638351	0.688244	0.759787	0.735324	0.652022	0.552247	0.539397	0.607993	0.720862	0.854987	0.984183	1.10121	1.10927	1.0475	1.00463	0.991804	1.02692	1.07568	1.13027	1.18887	1.23561	1.31296	1.41995	1.44815	1.37342	1.19789	0.942608	0.691446	0.500538	0.405913	0.38669	0.33515	0.203036	0.0208239
0.00623477	-0.129153	-0.21542	-0.246886	-0.244558	-0.283968	-0.406823	-0.576266	-0.703643	-0.714276	-0.559535	-0.326788	-0.0658232	0.155355	0.309094	0.45989	0.562563	0.606227	0.587789	0.504747	0.379891	0.288217	0.25154	0.264581	0.33099	0.447464	0.539133	0.515205	0.338724	0.027772	-0.270448	-0.464152	-0.490672	-0.398465	-0.188175	0.0691346	0.330614	0.521045	0.642123	0.679193	0.662933	0.579171	0.495844	0.467877	0.457388	0.432802	0.400945	0.35539	0.287721	0.247547
-0.0535889	0.0199962	0.100263	0.114143	0.0777178	0.0127556	0.0171966	0.103868	0.286489	0.510434	0.679714	0.706831	0.52443	0.230999	-0.113128	-0.352485	-0.467756	-0.477118	-0.440756	-0.313165	-0.152404	0.0187886	0.139964	0.217708	0.302538	0.360199	0.452301	0.553914	0.690012	0.811927	0.872881	0.845689	0.756688	0.645492	0.540809	0.455476	0.412903	0.368013	0.335736	0.293378	0.242827	0.256567	0.307916	0.367265	0.410035	0.376171	0.348728	0.33099	0.398476	0.491431
0.46496	0.41012	0.350691	0.287108	0.258076	0.212758	0.180555	0.138293	0.0878574	0.101566	0.152798	0.212012	0.254684	0.220897	0.193517	0.17582	0.243152	0.335894	0.470211	0.57914	0.70325	0.793379	0.882008	0.93026	0.9138	0.873551	0.807685	0.795069	0.819639	0.854585	0.864507	0.790017	0.648609	0.494195	0.45257	0.503253	0.550121	0.525388	0.437181	0.331054	0.264518	0.294982	0.372275	0.410006	0.35521	0.24463	0.164367	0.157519	0.245392	0.335989
0.851595	0.818525	0.819061	0.78978	0.765839	0.754317	0.781012	0.860929	0.920638	0.94719	0.892898	0.816183	0.650909	0.455321	0.315155	0.304806	0.420223	0.592932	0.797222	0.900751	0.9372	0.842794	0.749003	0.630986	0.485811	0.345773	0.22572	0.209523	0.278319	0.388959	0.416573	0.368076	0.177555	-0.106204	-0.466131	-0.811118	-1.06506	-1.18845	-1.20315	-1.13962	-1.0899	-1.08685	-1.10093	-1.14309	-1.16742	-1.18251	-1.1764	-1.18247	-1.2067	-1.2388
0.105393	0.108512	0.0436286	-0.0627493	-0.261297	-0.534417	-0.870786	-1.19319	-1.43052	-1.54583	-1.55957	-1.5002	-1.45373	-1.45088	-1.46404	-1.50344	-1.52618	-1.54028	-1.53457	-1.54025	-1.56288	-1.59289	-1.56232	-1.46971	-1.36522	-1.28366	-1.24013	-1.1957	-1.12842	-1.06692	-1.03556	-1.05855	-1.10604	-1.13289	-1.11606	-1.07744	-1.03713	-1.06699	-1.11065	-1.22237	-1.29786	-1.34208	-1.32155	-1.29651	-1.31198	-1.38126	-1.53628	-1.70098	-1.87569	-1.9747
0.966938	1.10153	1.15033	1.05837	0.841885	0.620838	0.484941	0.524142	0.657492	0.764789	0.81933	0.83627	0.845738	0.889433	0.936996	0.990327	1.0558	1.06154	1.01092	0.931164	0.810374	0.671522	0.59437	0.578176	0.618634	0.619092	0.617886	0.591931	0.585168	0.575175	0.541624	0.529968	0.568623	0.609741	0.618422	0.619743	0.673657	0.687267	0.593899	0.433594	0.205193	-0.0303093	-0.309926	-0.536922	-0.678584	-0.696131	-0.56413	-0.322168	-0.0960648	0.0419403
-0.32164	-0.407622	-0.476234	-0.456863	-0.378187	-0.214017	-0.0341605	0.0957524	0.163357	0.124175	0.0350667	-0.0340364	-0.0750908	-0.153427	-0.291677	-0.454163	-0.619646	-0.701579	-0.677816	-0.610853	-0.534171	-0.495841	-0.537318	-0.580722	-0.613049	-0.600363	-0.536867	-0.484249	-0.509001	-0.563224	-0.607	-0.552282	-0.381984	-0.19177	0.0169663	0.14264	0.238109	0.307392	0.395034	0.491042	0.50583	0.418214	0.195643	-0.0816415	-0.357639	-0.46913	-0.456326	-0.322418	-0.181522	-0.0880073
0.25834	0.120817	0.00842798	-0.0130143	0.0257054	0.0639413	0.0267985	-0.0995299	-0.220454	-0.322577	-0.360314	-0.34165	-0.268426	-0.125187	0.0749237	0.257226	0.354816	0.392555	0.395726	0.38641	0.394244	0.365344	0.359651	0.413278	0.462991	0.514689	0.514967	0.418961	0.311097	0.202929	0.141275	0.13853	0.129783	0.0668444	0.0120806	-0.0313785	-0.0222467	0.0252366	0.133762	0.318715	0.46123	0.568434	0.64211	0.677979	0.707738	0.712501	0.651748	0.530161	0.339528	0.0813074
0.208924	0.231365	0.290035	0.35696	0.367999	0.339511	0.27644	0.191973	0.226808	0.363132	0.593509	0.786288	0.847516	0.832619	0.731209	0.580103	0.466278	0.391396	0.312036	0.278075	0.253189	0.264788	0.289404	0.276144	0.231909	0.163514	0.110393	0.12693	0.188112	0.270112	0.374522	0.482882	0.531776	0.507578	0.391346	0.244914	0.141339	0.0577281	0.0266731	0.00738344	-0.0265122	-0.0709087	-0.0677651	-0.0517042	-0.034259	-0.000119177	-0.0111594	-0.0831854	-0.229427	-0.402039
-0.302293	-0.204164	-0.115054	0.0246881	0.111688	0.176178	0.241296	0.237305	0.246535	0.257873	0.335384	0.449292	0.648467	0.89744	1.15513	1.26261	1.10059	0.789212	0.365092	0.00234294	-0.215047	-0.277787	-0.238241	-0.133368	0.0199612	0.12333	0.201843	0.146991	-0.0357729	-0.29667	-0.520848	-0.599104	-0.573793	-0.499526	-0.45628	-0.433416	-0.423346	-0.354278	-0.264681	-0.189882	-0.130571	-0.0621828	0.0574438	0.143913	0.152264	0.123958	0.0941506	0.051182	0.0940027	0.189614
0.0891054	0.173178	0.399791	0.660406	0.922167	1.09699	1.16348	1.06557	0.903654	0.701884	0.491792	0.259382	-0.0271333	-0.225832	-0.271922	-0.167605	-0.0239446	0.101217	0.153965	0.170016	0.127461	0.110609	0.0242204	-0.113708	-0.237369	-0.273277	-0.176765	0.0282195	0.247142	0.389528	0.452082	0.436916	0.421854	0.397101	0.364156	0.236948	0.0198168	-0.239221	-0.423148	-0.463187	-0.432178	-0.3836	-0.337582	-0.287041	-0.27201	-0.250009	-0.263274	-0.23944	-0.275083	-0.328403
0.29263	0.136579	-0.0109802	-0.108259	-0.0983254	-0.0226097	0.0855924	0.155526	0.0887217	-0.0373472	-0.195253	-0.225305	-0.147398	-0.0499995	0.00143728	-0.084228	-0.253135	-0.384193	-0.399055	-0.273073	-0.0595066	0.118001	0.231698	0.315502	0.425016	0.626111	0.910527	1.25721	1.49941	1.60729	1.50508	1.34172	1.23044	1.2154	1.27551	1.31015	1.24633	1.00701	0.707654	0.403701	0.164217	0.0320815	0.0471841	0.214694	0.480791	0.743933	0.910162	0.979432	0.971992	0.973768
0.776416	0.94617	1.11823	1.24345	1.26811	1.24304	1.14562	1.03165	0.91357	0.764213	0.600778	0.491145	0.413029	0.372051	0.407109	0.455988	0.468943	0.423322	0.29624	0.160253	0.0577809	0.0309375	0.126245	0.184812	0.240619	0.288598	0.356373	0.378485	0.351893	0.207382	0.00955504	-0.219771	-0.421056	-0.522001	-0.607648	-0.645969	-0.740233	-0.833161	-0.933467	-0.992972	-0.961412	-0.918761	-0.84577	-0.800373	-0.767872	-0.716485	-0.626783	-0.482403	-0.297086	-0.154681
-0.246751	-0.146613	-0.0539962	0.0195469	-0.00838533	-0.0990378	-0.192025	-0.171597	-0.00530069	0.284291	0.619118	0.867514	0.995536	0.95861	0.766421	0.543973	0.339406	0.182244	0.0545354	-0.0662049	-0.1287	-0.170477	-0.217271	-0.206204	-0.171853	-0.0721156	0.0733037	0.240419	0.35394	0.33421	0.230271	0.106202	-0.0568208	-0.214412	-0.243765	-0.191583	-0.038223	0.132484	0.202314	0.149417	-0.0342063	-0.234569	-0.397987	-0.433374	-0.392461	-0.236511	-0.0670034	0.153559	0.36807	0.488912
0.347587	0.439834	0.469714	0.394315	0.273968	0.144337	-0.0136714	-0.166416	-0.194866	-0.144289	0.00435443	0.169811	0.237494	0.186223	0.00824751	-0.185953	-0.344345	-0.378643	-0.338988	-0.187835	-0.0235408	0.190237	0.398151	0.515276	0.506828	0.34656	0.120965	-0.11721	-0.298923	-0.416011	-0.56558	-0.751665	-0.929226	-1.00303	-0.971802	-0.813602	-0.674046	-0.534551	-0.376075	-0.190889	0.0508661	0.262587	0.413027	0.500336	0.494819	0.475272	0.548559	0.639182	0.712701	0.708265
0.107215	0.0811014	-4.7825e-05	-0.168419	-0.348651	-0.535736	-0.669673	-0.744387	-0.741734	-0.700579	-0.667804	-0.665251	-0.64727	-0.690568	-0.804157	-0.938839	-0.997877	-0.949094	-0.85577	-0.703716	-0.553232	-0.462751	-0.398691	-0.36992	-0.383506	-0.389042	-0.331676	-0.244224	-0.141276	-0.0546003	0.0274635	0.034588	-0.0344871	-0.146755	-0.239935	-0.216144	-0.109008	0.0545893	0.218695	0.266848	0.208219	0.03724	-0.137267	-0.261019	-0.270375	-0.274583	-0.301954	-0.40551	-0.516946	-0.563348
1.54656	1.12828	0.566299	0.0724518	-0.308856	-0.473147	-0.421352	-0.311139	-0.187892	-0.106964	-0.0239123	0.0728036	0.195225	0.272549	0.27127	0.162417	-0.0410584	-0.172484	-0.234831	-0.156448	-0.166284	-0.296864	-0.460248	-0.555959	-0.556889	-0.489086	-0.441419	-0.377759	-0.292767	-0.085839	0.289643	0.77685	1.19934	1.42312	1.41243	1.28412	1.15066	0.972608	0.801766	0.56183	0.305509	0.143692	0.0736473	0.0204302	-0.020119	-0.0232376	-0.00182233	0.0463824	0.0879515	0.140633
0.12636	0.0726588	0.103416	0.140081	0.185389	0.100728	-0.108844	-0.336045	-0.444418	-0.35464	-0.0781635	0.268251	0.536987	0.680345	0.791398	0.788574	0.662736	0.468771	0.240276	0.0203491	-0.0760875	-0.0724568	0.030607	0.311607	0.670036	0.959641	1.21236	1.35499	1.46554	1.49611	1.40434	1.2356	1.02042	0.866072	0.801749	0.778715	0.738127	0.70509	0.684681	0.753384	0.959769	1.21288	1.38145	1.41421	1.30591	1.091	0.895016	0.711294	0.65835	0.647653
1.22664	0.954943	0.715995	0.576991	0.520171	0.495013	0.46326	0.437415	0.421449	0.475196	0.636654	0.834667	0.96654	0.99217	0.907447	0.739314	0.585996	0.442268	0.40085	0.392481	0.428665	0.483401	0.567178	0.681093	0.793611	0.9029	0.942279	0.913145	0.778011	0.615353	0.466899	0.451574	0.510833	0.616561	0.690794	0.747852	0.781976	0.737886	0.601304	0.433254	0.321819	0.396286	0.626491	0.851089	1.00867	1.01307	0.908563	0.765291	0.634975	0.597047
-0.215023	-0.0428317	0.210564	0.485779	0.653653	0.721496	0.6052	0.320756	0.027507	-0.210301	-0.307939	-0.280769	-0.138599	-0.0280876	0.0195343	0.00815339	0.0479186	0.203153	0.378391	0.571148	0.663831	0.612348	0.519088	0.439397	0.30886	0.100536	-0.240464	-0.622722	-0.847224	-0.74967	-0.387363	0.106889	0.49805	0.664047	0.56111	0.26421	-0.074559	-0.346952	-0.537271	-0.619244	-0.61402	-0.570177	-0.40941	-0.213869	-0.0191476	0.145463	0.293961	0.467699	0.696312	0.890005
0.343352	0.459393	0.565889	0.694365	0.750973	0.683527	0.592584	0.514872	0.387577	0.184427	-0.148103	-0.520867	-0.739793	-0.644662	-0.291354	0.190622	0.572068	0.733942	0.633561	0.344036	0.0136808	-0.251946	-0.437538	-0.517476	-0.512381	-0.469627	-0.312853	-0.122169	0.0677159	0.228238	0.373048	0.542471	0.765406	0.954288	1.02251	0.942384	0.814838	0.742129	0.788828	0.884067	0.932656	0.899814	0.868628	0.825505	0.850665	0.861444	0.796134	0.621299	0.371504	0.0946554
0.66405	0.472378	0.208693	-0.148797	-0.516778	-0.734888	-0.644066	-0.30676	0.153385	0.517554	0.672096	0.576262	0.29985	-0.0155417	-0.269138	-0.446323	-0.52264	-0.517776	-0.476959	-0.327286	-0.145238	0.0360459	0.189297	0.327548	0.489297	0.702134	0.882461	0.947593	0.871096	0.749328	0.679912	0.724496	0.815421	0.861809	0.830455	0.800682	0.759511	0.783532	0.793823	0.73147	0.564555	0.326074	0.0617652	-0.0939013	-0.130829	-0.121898	-0.044797	0.0600886	0.207703	0.249962
0.32814	0.276069	0.217556	0.160752	0.137158	0.168637	0.220905	0.269332	0.27714	0.262486	0.248375	0.20528	0.136653	0.0355401	-0.0495985	-0.0805163	-0.0689528	-0.0781891	-0.0383447	0.0186188	0.143618	0.339189	0.582226	0.814468	0.980813	1.08467	1.17234	1.27881	1.40176	1.48085	1.51781	1.48197	1.33621	1.15836	0.995345	0.935649	0.963233	1.01341	1.00943	0.934093	0.760584	0.588324	0.508607	0.525383	0.61864	0.707581	0.748789	0.70129	0.601352	0.491642
-0.344228	-0.304914	-0.246901	-0.189543	-0.180548	-0.133107	-0.0711479	0.0648124	0.277533	0.541882	0.794489	0.975421	1.08838	1.18375	1.29955	1.43328	1.5193	1.55951	1.52052	1.36199	1.16853	0.991228	0.926297	0.956299	1.01087	1.00654	0.924604	0.73588	0.548514	0.461807	0.480054	0.581489	0.678229	0.72305	0.671386	0.562685	0.443355	0.363912	0.323797	0.324277	0.394329	0.490835	0.553482	0.578875	0.51938	0.461632	0.379742	0.223965	0.0144432	-0.181089
0.164383	0.0594439	-0.0853369	-0.215313	-0.260789	-0.20274	-0.0715756	0.087146	0.180541	0.186255	0.110851	0.0138219	-0.0928137	-0.187098	-0.25104	-0.233337	-0.168011	-0.0354378	0.0914113	0.235046	0.321742	0.321286	0.26865	0.185257	0.10391	-0.0118699	-0.218117	-0.510394	-0.802941	-1.07213	-1.25186	-1.34118	-1.34337	-1.18284	-0.933871	-0.669248	-0.49861	-0.425977	-0.421129	-0.411996	-0.41588	-0.439397	-0.459471	-0.497298	-0.538012	-0.541695	-0.503458	-0.44413	-0.350631	-0.27876
-0.691066	-0.750484	-0.727874	-0.601755	-0.412245	-0.226449	-0.096898	-0.0811956	-0.182062	-0.28476	-0.327647	-0.248024	-0.0290292	0.20814	0.393616	0.465451	0.395347	0.266207	0.156496	0.0615158	-0.00324547	-0.0451298	-0.105361	-0.188598	-0.213845	-0.19387	-0.122966	0.00724851	0.188852	0.357832	0.460347	0.526535	0.597422	0.623687	0.572731	0.515486	0.427727	0.362044	0.336037	0.35668	0.395978	0.397643	0.321042	0.214172	0.0817975	-0.135061	-0.318158	-0.474401	-0.586562	-0.615376
-0.133303	-0.0240976	0.0479963	0.0327	-0.0776363	-0.173014	-0.215004	-0.137046	0.07737	0.30958	0.491178	0.561512	0.492873	0.366433	0.259017	0.166022	0.102615	0.061606	0.00263386	-0.0788621	-0.103581	-0.0840238	-0.0146028	0.112889	0.290695	0.456142	0.556514	0.621318	0.690723	0.716439	0.666548	0.6105	0.524576	0.460266	0.434803	0.455014	0.49349	0.495121	0.420122	0.315486	0.185879	-0.0264447	-0.205714	-0.358689	-0.468505	-0.496717	-0.477633	-0.378605	-0.231341	-0.0251072
-0.0274723	0.10118	0.216888	0.300329	0.321263	0.254806	0.149791	0.0197159	-0.193376	-0.373294	-0.526823	-0.637036	-0.665349	-0.646197	-0.54681	-0.399014	-0.192034	0.0379709	0.169283	0.0716968	-0.161053	-0.441138	-0.685692	-0.799666	-0.811022	-0.801452	-0.791178	-0.771305	-0.720235	-0.684955	-0.635342	-0.56315	-0.451475	-0.332421	-0.203079	-0.0817719	-0.0585522	-0.0669485	-0.0912617	-0.100474	-0.138426	-0.208477	-0.306849	-0.377623	-0.429291	-0.526954	-0.598471	-0.567124	-0.47006	-0.328283
-0.00469486	-0.0809348	-0.16872	-0.260441	-0.374858	-0.418973	-0.346098	-0.179157	-0.0438945	-0.0187046	-0.0965001	-0.238308	-0.369507	-0.435617	-0.345925	-0.163722	0.0689331	0.308475	0.459993	0.507031	0.477544	0.406756	0.350912	0.345226	0.388513	0.495671	0.545935	0.561128	0.584202	0.696648	0.89863	1.10437	1.2177	1.13772	1.00578	0.828254	0.733256	0.686936	0.616532	0.516877	0.417919	0.362948	0.345784	0.394716	0.379504	0.434036	0.540555	0.702391	0.931119	1.17944
-0.466637	-0.456752	-0.343749	-0.16715	-0.0342409	-0.0132825	-0.0911278	-0.233027	-0.364309	-0.430463	-0.340713	-0.158393	0.0744114	0.314107	0.465722	0.51279	0.483284	0.412451	0.356571	0.350881	0.394196	0.501423	0.551719	0.566922	0.59001	0.702529	0.90464	1.11051	1.22392	1.14388	1.01186	0.834219	0.73916	0.69281	0.622362	0.522643	0.423621	0.368615	0.35144	0.400403	0.385182	0.439748	0.546336	0.708276	0.93715	1.18563	1.34712	1.35689	1.23699	1.1536
0.744183	0.678441	0.59556	0.566839	0.557859	0.501702	0.406609	0.312182	0.259727	0.243349	0.290041	0.275526	0.327561	0.429203	0.58363	0.801887	1.03884	1.19283	1.20215	1.08781	1.0083	0.95512	0.904022	0.791063	0.628474	0.462196	0.32545	0.304523	0.373436	0.494217	0.578654	0.670557	0.756511	0.819555	0.833479	0.754551	0.60025	0.443933	0.366455	0.383745	0.464671	0.610241	0.697255	0.679944	0.557753	0.398122	0.268986	0.235391	0.281484	0.330432
-0.394331	-0.281722	-0.22429	-0.268059	-0.344424	-0.383692	-0.354483	-0.309637	-0.289315	-0.306196	-0.333503	-0.34622	-0.348575	-0.326338	-0.319761	-0.347395	-0.401716	-0.454	-0.515992	-0.563653	-0.591092	-0.59368	-0.557018	-0.446498	-0.278964	-0.0829962	0.115001	0.240615	0.320163	0.299144	0.239068	0.157808	0.0894977	0.105104	0.237883	0.394593	0.52527	0.526021	0.400698	0.159034	-0.0938932	-0.253874	-0.344744	-0.36069	-0.367547	-0.301648	-0.268453	-0.242948	-0.21604	-0.253757
0.669552	0.61936	0.56379	0.483917	0.410645	0.442022	0.618585	0.826969	1.00074	1.00173	0.835088	0.513735	0.177406	-0.0353279	-0.156161	-0.177365	-0.186483	-0.0988541	-0.0547138	-0.0207992	0.0149823	-0.0351723	-0.162755	-0.359083	-0.515859	-0.566849	-0.429015	-0.165553	0.165863	0.34972	0.40153	0.400484	0.461051	0.695199	1.13336	1.61838	1.95736	1.98009	1.73523	1.29753	0.875297	0.563786	0.364818	0.30461	0.335165	0.506073	0.651817	0.718702	0.580206	0.331558
0.276472	0.284822	0.204994	0.0669509	-0.136705	-0.375518	-0.557604	-0.615398	-0.608249	-0.545196	-0.451198	-0.339214	-0.228019	-0.160699	-0.0947683	-0.032375	0.0608444	0.154889	0.260363	0.307274	0.315535	0.317715	0.323168	0.314549	0.217723	0.0905558	-0.0311561	-0.0590386	0.0583726	0.218156	0.268918	0.163264	-0.0295168	-0.150082	-0.180747	-0.122561	0.0183603	0.197413	0.380152	0.504863	0.579937	0.546351	0.481563	0.391351	0.359709	0.396238	0.429195	0.436799	0.416964	0.38412
-0.973583	-0.778231	-0.593143	-0.370125	-0.106014	0.177131	0.370558	0.417766	0.264741	0.0219888	-0.168234	-0.289562	-0.297279	-0.275493	-0.280671	-0.365973	-0.481522	-0.638167	-0.675089	-0.600015	-0.463541	-0.351935	-0.237179	-0.156673	-0.035637	0.155454	0.324794	0.379272	0.257238	0.0590938	-0.198901	-0.420776	-0.559085	-0.60447	-0.635639	-0.658138	-0.719923	-0.823607	-0.881665	-0.851088	-0.718561	-0.530759	-0.334519	-0.145952	0.00823264	0.121935	0.187236	0.197825	0.223077	0.17903
0.668458	0.515381	0.287562	0.034993	-0.136218	-0.241875	-0.249113	-0.228682	-0.233538	-0.313535	-0.421898	-0.568803	-0.60343	-0.533024	-0.405036	-0.30037	-0.19275	-0.11725	-0.00374033	0.175468	0.334278	0.385369	0.270923	0.0850998	-0.156852	-0.36493	-0.494639	-0.537201	-0.566433	-0.587533	-0.645475	-0.742712	-0.79716	-0.768484	-0.644198	-0.468074	-0.284037	-0.107195	0.0374013	0.144033	0.205274	0.215204	0.238886	0.197578	0.114113	0.0208314	-0.113082	-0.23189	-0.373711	-0.477115
-0.354548	-0.0530283	0.19476	0.369273	0.414696	0.356696	0.205179	0.0617345	-0.0240893	-0.0190167	0.000814811	0.0951186	0.217402	0.33516	0.436287	0.533162	0.576264	0.533235	0.461976	0.41103	0.454976	0.575057	0.692317	0.777339	0.751571	0.66037	0.590998	0.558846	0.593278	0.657528	0.73562	0.770587	0.777572	0.737794	0.698091	0.723863	0.730082	0.698244	0.572708	0.36467	0.123285	-0.0916772	-0.293482	-0.466335	-0.567803	-0.591777	-0.51718	-0.344723	-0.0690746	0.239563
0.8152	0.772504	0.720154	0.677328	0.710174	0.720737	0.686351	0.550769	0.326083	0.0653822	-0.166782	-0.384736	-0.571421	-0.681009	-0.706901	-0.626335	-0.440077	-0.142371	0.190965	0.542981	0.833443	1.04167	1.13525	1.11128	1.05219	1.04037	1.14501	1.28685	1.36928	1.30458	1.10761	0.808601	0.553308	0.395797	0.376025	0.424925	0.520113	0.627084	0.724886	0.786512	0.758155	0.673025	0.534211	0.432538	0.360037	0.34652	0.338152	0.301051	0.187492	0.0165685
-0.738521	-0.666074	-0.50492	-0.241636	0.0608387	0.39467	0.67979	0.884189	0.976043	0.952522	0.894515	0.882914	0.985624	1.12486	1.20578	1.14227	0.948911	0.655405	0.404806	0.250192	0.230784	0.278784	0.372222	0.477226	0.57323	0.633722	0.605887	0.522322	0.386061	0.286258	0.21509	0.201822	0.193607	0.157189	0.0457182	-0.122062	-0.239673	-0.29058	-0.280675	-0.194352	-0.160646	-0.183793	-0.27832	-0.408274	-0.489159	-0.53843	-0.571247	-0.5712	-0.570223	-0.588438
0.402315	0.149325	-0.0550038	-0.194163	-0.310414	-0.407789	-0.503151	-0.537133	-0.550315	-0.572381	-0.632548	-0.698295	-0.667304	-0.528985	-0.224493	0.0877343	0.287613	0.299419	0.176887	0.0746196	0.0478486	0.10269	0.18538	0.328188	0.524097	0.704927	0.796419	0.81904	0.751312	0.645939	0.537152	0.511185	0.568373	0.613245	0.554262	0.424824	0.261615	0.116507	0.0153111	0.0473116	0.101969	0.104242	0.0114365	-0.122505	-0.28222	-0.32563	-0.235332	-0.0444506	0.15414	0.253011
-0.0712862	-0.0114629	0.081223	0.181082	0.299323	0.409218	0.555044	0.755093	0.939745	1.03317	1.05627	0.98711	0.87951	0.768423	0.741908	0.800304	0.846125	0.785895	0.653722	0.487064	0.33889	0.235555	0.268232	0.324044	0.326365	0.231598	0.0948265	-0.0682635	-0.112592	-0.0203847	0.17453	0.377318	0.478278	0.507913	0.477043	0.425172	0.3987	0.408491	0.426212	0.461526	0.554691	0.670971	0.760248	0.765495	0.741309	0.687101	0.635574	0.549783	0.473723	0.456325
-0.588003	-0.741968	-0.887076	-0.993316	-1.07154	-1.04	-0.935163	-0.772628	-0.624124	-0.521643	-0.478657	-0.429729	-0.393523	-0.323344	-0.24837	-0.152713	-0.0513829	0.0862101	0.289259	0.494683	0.627826	0.602666	0.444371	0.193044	-0.0237008	-0.149397	-0.0951927	0.0657438	0.261313	0.408415	0.527694	0.619676	0.620385	0.540466	0.48375	0.378954	0.327006	0.274124	0.203645	0.172077	0.221155	0.311481	0.392272	0.392551	0.27219	0.053222	-0.214426	-0.474936	-0.645272	-0.699314
0.0962887	0.297935	0.538511	0.755588	0.88825	0.865528	0.706362	0.453653	0.235716	0.109328	0.163831	0.325652	0.522297	0.670209	0.790144	0.882632	0.883345	0.802986	0.745958	0.640586	0.588352	0.535179	0.464313	0.432571	0.481918	0.572742	0.653977	0.654257	0.533234	0.313062	0.0439417	-0.218002	-0.389275	-0.443614	-0.394436	-0.246801	-0.0556168	0.0513242	0.0611638	-0.0530777	-0.201028	-0.235149	-0.170738	-0.0514106	0.00465907	-0.0437257	-0.135782	-0.142142	-0.0308152	0.195664
1.29642	1.16212	0.967726	0.727067	0.452537	0.231248	0.106846	0.160492	0.319772	0.513327	0.658915	0.776966	0.868001	0.868703	0.789606	0.733474	0.629758	0.578345	0.526007	0.456254	0.425011	0.473583	0.562979	0.642938	0.643214	0.524092	0.307379	0.042487	-0.215342	-0.383924	-0.437409	-0.389004	-0.243688	-0.0555073	0.0497535	0.0594385	-0.0530082	-0.198634	-0.232219	-0.16882	-0.0513672	0.00382152	-0.0438031	-0.134413	-0.140673	-0.0310954	0.191826	0.441505	0.588818	0.568886
-0.295393	-0.252432	-0.281386	-0.389456	-0.55058	-0.689632	-0.725862	-0.648699	-0.522996	-0.372529	-0.296157	-0.333478	-0.401654	-0.486488	-0.604055	-0.66958	-0.655108	-0.529524	-0.314159	-0.100378	0.107323	0.231905	0.283484	0.272589	0.233906	0.223759	0.258631	0.353694	0.452963	0.520581	0.548937	0.540547	0.475032	0.369982	0.221818	0.0852134	-0.00901319	-0.0583467	-0.0330622	0.0165495	0.0297031	0.0480679	0.0263671	-0.00142575	-0.12152	-0.321387	-0.60112	-0.776181	-0.737755	-0.551483
0.0246017	0.112897	0.176411	0.185156	0.200525	0.174123	0.14439	0.0159112	-0.197909	-0.49717	-0.684452	-0.643344	-0.444068	-0.22375	-0.179905	-0.20237	-0.204349	-0.135142	-0.0715082	-0.0840903	-0.206665	-0.308162	-0.258124	-0.118454	-0.0103465	-0.00564336	-0.0956169	-0.246682	-0.353329	-0.357626	-0.226585	-0.0319066	0.289136	0.625486	0.890231	0.980336	0.90696	0.753658	0.608639	0.455227	0.338641	0.251759	0.169967	0.0835457	-0.0444658	-0.264131	-0.449781	-0.542766	-0.502646	-0.323325
-0.756032	-0.611446	-0.425288	-0.243374	-0.102233	-0.0340495	-0.0403474	-0.11209	-0.17153	-0.202485	-0.259092	-0.272391	-0.217919	-0.0744647	0.0912796	0.207544	0.210276	0.100736	-0.0586422	-0.143436	-0.0570145	0.0919928	0.246689	0.31729	0.349533	0.35559	0.360466	0.482671	0.641304	0.764692	0.836416	0.918338	0.973078	0.933539	0.728202	0.463017	0.207357	-0.00154606	-0.175096	-0.269211	-0.291526	-0.242859	-0.153073	-0.0719734	-0.140099	-0.318028	-0.571844	-0.840633	-0.963004	-0.977175
-0.397708	-0.396755	-0.395561	-0.383178	-0.396066	-0.49236	-0.606819	-0.720415	-0.798174	-0.852872	-0.876753	-0.895298	-0.911578	-0.966283	-0.96787	-0.84898	-0.630164	-0.347084	-0.0982132	0.0590749	0.0904456	-0.0483033	-0.251661	-0.424236	-0.527881	-0.48942	-0.31252	-0.0542678	0.208802	0.423545	0.61243	0.752357	0.733857	0.579835	0.355991	0.166638	0.0868918	0.0671282	0.0693974	0.0286977	-0.10923	-0.281201	-0.428422	-0.501045	-0.490469	-0.424672	-0.33962	-0.213803	-0.122195	-0.0651528
0.270982	0.0906678	-0.0828392	-0.222822	-0.304014	-0.248402	-0.0546853	0.228117	0.516195	0.751351	0.958192	1.11142	1.09116	0.922499	0.677375	0.470022	0.382695	0.361053	0.363538	0.318969	0.16793	-0.0203883	-0.181605	-0.261132	-0.24955	-0.177498	-0.0843615	0.0534164	0.153733	0.216197	0.17812	0.125472	0.0328775	-0.0326434	-0.0311609	0.0841431	0.294441	0.486028	0.646687	0.821415	0.982356	1.17367	1.31043	1.31956	1.16817	0.99485	0.84953	0.804442	0.792682	0.722557
0.246396	0.317529	0.380709	0.422127	0.507719	0.672655	0.869987	1.08237	1.27769	1.35049	1.29481	1.08929	0.806247	0.519122	0.376807	0.33004	0.331958	0.328216	0.30199	0.318535	0.356583	0.503785	0.674	0.822189	0.919612	0.991165	1.03524	1.05915	1.09936	1.16549	1.30057	1.36971	1.35424	1.21569	0.95235	0.659088	0.391726	0.220967	0.135793	0.0768338	-0.0330958	-0.159899	-0.199182	-0.0775953	0.208255	0.506518	0.683802	0.694232	0.534331	0.290796
-0.802386	-0.657956	-0.502344	-0.35195	-0.249425	-0.202843	-0.220878	-0.241444	-0.249473	-0.227665	-0.211792	-0.234628	-0.318302	-0.415608	-0.500107	-0.595296	-0.697899	-0.748749	-0.763254	-0.683231	-0.48368	-0.230439	0.0429953	0.255375	0.457834	0.634405	0.722224	0.768106	0.75166	0.67368	0.572484	0.459508	0.344328	0.204456	0.0510641	-0.0827013	-0.19657	-0.303721	-0.380797	-0.40153	-0.406441	-0.387455	-0.373551	-0.413462	-0.501662	-0.605141	-0.673771	-0.648416	-0.498029	-0.305843
-0.742591	-0.591565	-0.34372	-0.0676211	0.223091	0.453963	0.679521	0.876238	0.974077	1.02519	1.00687	0.919994	0.807252	0.681386	0.553065	0.397234	0.226342	0.0773146	-0.0495461	-0.168922	-0.254792	-0.277891	-0.283361	-0.26221	-0.246719	-0.291183	-0.389447	-0.504732	-0.581192	-0.552944	-0.3854	-0.171285	0.0575323	0.195538	0.233956	0.182501	0.0261558	-0.164226	-0.340001	-0.4571	-0.511526	-0.490315	-0.388846	-0.239344	-0.140369	-0.0974754	-0.131342	-0.185828	-0.324109	-0.486267
-0.214094	-0.0635604	0.0391578	0.155618	0.267098	0.366533	0.409481	0.409537	0.353206	0.234992	0.232743	0.33571	0.529878	0.724731	0.806145	0.772234	0.682836	0.658051	0.634389	0.619247	0.594722	0.621569	0.77443	0.990325	1.17368	1.27728	1.32338	1.25745	1.11163	0.949741	0.825714	0.720302	0.634334	0.640836	0.668691	0.78812	0.943495	1.0608	1.01667	0.775879	0.462686	0.223872	0.14215	0.215363	0.34952	0.434955	0.50314	0.535664	0.575838	0.603228
1.10411	1.09026	1.08611	1.02308	0.899545	0.770466	0.665718	0.576692	0.504086	0.509578	0.533103	0.633968	0.765191	0.864263	0.826995	0.62363	0.359119	0.157426	0.0884073	0.15024	0.263544	0.335699	0.393285	0.420754	0.454683	0.477815	0.484467	0.458987	0.425739	0.437261	0.4475	0.333423	0.109684	-0.187883	-0.418132	-0.484356	-0.47062	-0.383691	-0.366943	-0.446986	-0.614546	-0.728608	-0.759449	-0.586902	-0.29535	-0.0253493	0.100151	0.043133	-0.170736	-0.394512
-0.382947	-0.267129	-0.130014	-0.0149996	0.0938388	0.237678	0.427271	0.618186	0.721235	0.792792	0.77633	0.703332	0.556289	0.389235	0.188402	0.0195963	-0.0573363	-0.0627189	-0.0306237	-0.0117212	0.000660211	0.0156485	0.0346916	0.102679	0.199575	0.337417	0.410377	0.474458	0.562581	0.636215	0.698328	0.655136	0.556181	0.485725	0.543331	0.69185	0.863325	0.982664	1.03116	1.01091	0.909666	0.788242	0.666491	0.585862	0.518404	0.455869	0.391033	0.333158	0.27187	0.231991
0.570765	0.607337	0.584222	0.593362	0.658854	0.724937	0.789888	0.744723	0.641247	0.567572	0.627809	0.783114	0.962423	1.08721	1.13793	1.11675	1.01088	0.88391	0.756596	0.672284	0.601744	0.536352	0.468553	0.408034	0.343946	0.302246	0.201929	0.0857459	-0.0370436	-0.0812735	-0.0407961	0.0971073	0.290496	0.524855	0.704361	0.765483	0.779866	0.859379	0.966061	1.13094	1.27505	1.31885	1.22084	1.02712	0.762987	0.572338	0.472435	0.486474	0.540321	0.593279
-0.486885	-0.331705	-0.302167	-0.388907	-0.516093	-0.648512	-0.675405	-0.545237	-0.340212	-0.16048	-0.0750272	-0.097207	-0.23059	-0.360352	-0.433751	-0.454883	-0.391217	-0.300513	-0.184707	-0.0710928	0.0525236	0.195547	0.352374	0.503556	0.63977	0.746193	0.788723	0.851394	0.911258	0.958333	0.97541	0.921217	0.909488	0.975139	1.07717	1.14287	1.13579	1.03171	0.877521	0.681785	0.47847	0.316302	0.249284	0.239888	0.217403	0.194817	0.177877	0.249221	0.371417	0.499702
-0.885656	-0.77888	-0.65156	-0.556347	-0.513701	-0.536611	-0.595154	-0.620235	-0.579917	-0.473344	-0.327059	-0.215095	-0.158383	-0.198368	-0.349819	-0.542862	-0.756758	-0.850164	-0.775808	-0.666147	-0.623255	-0.646819	-0.75204	-0.892169	-1.01967	-1.10796	-1.10877	-1.00858	-0.890139	-0.813362	-0.757227	-0.690113	-0.630125	-0.53217	-0.399814	-0.277049	-0.173511	-0.179302	-0.230905	-0.375367	-0.524707	-0.614476	-0.591506	-0.47952	-0.331934	-0.186503	0.0106041	0.224783	0.379905	0.499374
0.792786	0.677049	0.502872	0.303428	0.186507	0.18517	0.254177	0.28238	0.265217	0.212101	0.178184	0.221602	0.358356	0.519714	0.610945	0.621571	0.538269	0.467337	0.30382	0.189263	0.116318	0.0734177	0.0512765	0.0242283	0.0216593	0.114238	0.245356	0.409288	0.557258	0.601343	0.57818	0.534938	0.484616	0.435757	0.360903	0.274348	0.224568	0.235132	0.382012	0.570514	0.679463	0.723758	0.724835	0.712307	0.692422	0.650272	0.550349	0.469946	0.451883	0.573266
-0.26628	-0.203826	-0.125233	-0.0149225	0.0294501	-0.0134985	-0.128081	-0.226185	-0.298107	-0.229137	-0.109526	0.0812228	0.277422	0.473078	0.527848	0.402404	0.146225	-0.139655	-0.357679	-0.452701	-0.402149	-0.304139	-0.201692	-0.170735	-0.226891	-0.303123	-0.315232	-0.240248	-0.13299	-0.075203	-0.121207	-0.13417	-0.0728149	-0.00243813	0.00075919	-0.03182	-0.123137	-0.199923	-0.156404	-0.0308373	0.19429	0.402857	0.51604	0.600389	0.6569	0.691566	0.736048	0.778545	0.866757	0.944072
-0.876668	-0.84217	-0.771437	-0.684525	-0.579744	-0.507737	-0.452681	-0.363373	-0.283503	-0.213721	-0.157283	-0.112029	-0.0893192	-0.0196301	0.0881449	0.246538	0.381746	0.463014	0.542006	0.517507	0.471018	0.45567	0.464963	0.480932	0.436019	0.388912	0.342299	0.257612	0.254967	0.337753	0.481887	0.652677	0.713015	0.624237	0.40192	0.160829	-0.0615619	-0.268729	-0.430425	-0.550894	-0.532474	-0.442959	-0.185636	0.124104	0.403176	0.582115	0.609353	0.563296	0.479595	0.417378
0.550339	0.571899	0.570524	0.498877	0.439352	0.382229	0.295243	0.292526	0.37756	0.525606	0.701034	0.76301	0.671822	0.443469	0.195832	-0.0325962	-0.245388	-0.411474	-0.535214	-0.516293	-0.424348	-0.160039	0.15811	0.444759	0.628556	0.656534	0.609226	0.523253	0.459347	0.405728	0.360473	0.304225	0.253777	0.245851	0.256249	0.319854	0.368055	0.41341	0.467136	0.431587	0.327423	0.183881	0.0550683	0.00280121	0.00984242	-0.0145645	-0.117211	-0.272376	-0.392575	-0.426783
-0.123614	-0.294743	-0.415623	-0.54406	-0.618728	-0.659335	-0.690245	-0.738704	-0.788	-0.847319	-0.896045	-0.846659	-0.739753	-0.606031	-0.535217	-0.512394	-0.538896	-0.568406	-0.578263	-0.507952	-0.340904	-0.114994	0.120509	0.338099	0.544548	0.677209	0.75563	0.76615	0.753402	0.719696	0.694675	0.679707	0.617692	0.527506	0.387754	0.230582	0.0991453	0.0163802	-0.0248482	-0.0376959	-0.0153265	-0.00382495	-0.0163236	-0.0875361	-0.183394	-0.202808	-0.14257	0.0227085	0.217551	0.358323
1.10985	1.04435	1.00877	0.989959	0.918511	0.819265	0.666089	0.493819	0.349757	0.259042	0.213853	0.199771	0.224289	0.236896	0.223196	0.145143	0.0400775	0.0187991	0.0848231	0.265978	0.479537	0.633831	0.698363	0.725162	0.779467	0.854598	0.890535	0.881821	0.801953	0.711225	0.640512	0.628295	0.640338	0.588775	0.423143	0.163315	-0.114537	-0.272608	-0.221406	0.00971407	0.320791	0.579997	0.752512	0.797759	0.748964	0.647627	0.581665	0.554039	0.585205	0.619912
0.633933	0.584514	0.501343	0.404016	0.261523	0.0832764	-0.0675174	-0.191427	-0.217882	-0.0916009	0.186667	0.557609	0.837811	0.923076	0.816661	0.540317	0.203065	-0.0514023	-0.220252	-0.237067	-0.143799	-0.0405531	0.018512	-0.0645778	-0.228031	-0.328542	-0.357728	-0.272807	-0.173448	-0.195226	-0.291396	-0.402859	-0.419566	-0.279058	-0.0268079	0.222673	0.373888	0.383483	0.344027	0.359	0.465311	0.597698	0.714228	0.745922	0.685781	0.541214	0.405549	0.312898	0.253267	0.209461
1.06134	0.928831	0.78516	0.723474	0.809515	1.05837	1.31941	1.3949	1.16453	0.679562	0.152779	-0.123976	-0.00798236	0.407601	0.895883	1.23223	1.41788	1.39151	1.25696	1.01571	0.742942	0.475189	0.258377	0.123822	0.0262685	-0.055528	-0.106267	-0.148972	-0.230913	-0.356804	-0.468838	-0.550478	-0.520719	-0.493169	-0.477691	-0.497038	-0.574868	-0.584764	-0.468686	-0.223848	0.0483737	0.275551	0.311911	0.213234	0.0602457	-0.0436112	-0.0965519	-0.0399571	0.103201	0.300613
-0.284379	-0.119859	0.106505	0.279748	0.388016	0.391586	0.296421	0.185271	0.0876247	0.0107119	-0.0689462	-0.166469	-0.21057	-0.181355	-0.102909	-0.00944763	0.0827675	0.154564	0.191331	0.242084	0.294091	0.280715	0.106524	-0.18146	-0.458401	-0.661734	-0.722614	-0.630535	-0.437288	-0.155897	0.1102	0.303357	0.357856	0.362552	0.33649	0.298535	0.248026	0.154824	0.0886377	0.0605459	0.0749159	0.169571	0.261497	0.298005	0.25209	0.0850521	-0.0950442	-0.166208	-0.0744335	0.198369
0.0693201	0.0746541	0.0904492	0.119304	0.159926	0.271165	0.367484	0.405736	0.357627	0.182608	-0.00609428	-0.0806589	0.0155012	0.301339	0.669816	0.938936	1.06374	0.989075	0.788573	0.55182	0.325331	0.21012	0.165904	0.167988	0.230391	0.279113	0.313537	0.308912	0.325729	0.320827	0.294905	0.198965	0.127128	0.0474022	-0.0138103	-0.0223332	0.00555185	0.0192047	0.00607532	-0.0473697	-0.0509755	0.0365795	0.162629	0.279343	0.32359	0.305519	0.249354	0.255119	0.332289	0.433622
0.405408	0.272846	0.152352	0.00395516	-0.0958954	-0.18973	-0.254865	-0.263934	-0.234262	-0.219734	-0.233705	-0.290575	-0.294412	-0.201246	-0.0671183	0.0570766	0.104159	0.0849297	0.025165	0.0312998	0.113416	0.221243	0.255597	0.170595	0.0316605	-0.0656488	-0.0277127	0.0845348	0.265579	0.295784	0.172455	-0.0725736	-0.316631	-0.437627	-0.389999	-0.197601	0.0709965	0.355828	0.574227	0.716372	0.700093	0.601858	0.462668	0.264075	0.0304486	-0.201375	-0.458214	-0.653186	-0.755789	-0.70559
-0.502973	-0.358848	-0.264694	-0.237596	-0.287074	-0.386836	-0.528971	-0.660494	-0.720617	-0.696547	-0.599029	-0.53194	-0.592334	-0.790162	-0.998935	-1.09183	-0.930328	-0.619708	-0.277679	0.0245423	0.236894	0.365445	0.460166	0.499556	0.422522	0.313744	0.195453	0.0847609	-0.00813384	-0.0605026	-0.1184	-0.181666	-0.230067	-0.217857	-0.23061	-0.238571	-0.27356	-0.296885	-0.325334	-0.346715	-0.348061	-0.353497	-0.336674	-0.305018	-0.294699	-0.268233	-0.222078	-0.154983	-0.0237974	0.173706
1.02776	0.915001	0.825841	0.7242	0.575689	0.329935	0.0905574	-0.121253	-0.188481	-0.0721973	0.139454	0.418293	0.551108	0.494704	0.285465	0.0772372	-0.0266879	-0.0530224	0.0256912	0.153762	0.287012	0.369056	0.413556	0.402092	0.340231	0.327115	0.336469	0.416404	0.510103	0.599378	0.589738	0.541718	0.488293	0.417928	0.346959	0.156333	-0.00812277	-0.0805922	-0.0757226	-0.0699637	-0.140132	-0.315444	-0.529199	-0.727664	-0.861501	-0.903238	-0.915872	-0.892578	-0.849357	-0.767151
-0.559494	-0.416702	-0.267645	-0.170314	-0.0443636	0.0871756	0.207857	0.282162	0.322465	0.312082	0.256056	0.244177	0.252648	0.325044	0.409905	0.490758	0.482027	0.438537	0.390152	0.326424	0.262149	0.0895047	-0.0594385	-0.125072	-0.120662	-0.115446	-0.178996	-0.337771	-0.531363	-0.711107	-0.83232	-0.87012	-0.881562	-0.860465	-0.821321	-0.74687	-0.611942	-0.420583	-0.17421	0.0850789	0.369837	0.573655	0.645812	0.506258	0.219708	-0.149402	-0.442145	-0.57622	-0.590998	-0.527458
0.00262237	0.135742	0.237048	0.301382	0.332813	0.320906	0.264781	0.252882	0.261367	0.333891	0.418902	0.499899	0.491153	0.447586	0.399115	0.335274	0.270885	0.0979348	-0.0512723	-0.117022	-0.112604	-0.107379	-0.171041	-0.330098	-0.524033	-0.704095	-0.825523	-0.86339	-0.874852	-0.853718	-0.814505	-0.739922	-0.604754	-0.413057	-0.166247	0.0935011	0.378764	0.582943	0.655228	0.515426	0.228368	-0.141396	-0.434657	-0.56897	-0.583774	-0.520121	-0.462092	-0.399353	-0.293106	-0.105003
-0.160727	-0.119756	-0.00376034	0.29791	0.664336	0.984618	1.23718	1.3144	1.31599	1.26555	1.2258	1.18117	1.19994	1.19721	1.09824	0.906126	0.701473	0.595158	0.566461	0.59644	0.639453	0.634545	0.566199	0.486707	0.419862	0.371534	0.280388	0.11853	-0.110574	-0.387886	-0.486006	-0.33995	-0.045938	0.212782	0.326173	0.297036	0.253067	0.202668	0.199017	0.236036	0.281823	0.394134	0.508542	0.581452	0.605093	0.587863	0.525145	0.437934	0.271339	0.124269
-0.502244	-0.469773	-0.394977	-0.262676	-0.103991	0.0263232	0.0979875	0.0621658	-0.0794865	-0.276351	-0.442204	-0.52958	-0.523528	-0.434495	-0.339318	-0.241539	-0.129294	-0.000393507	0.114487	0.215128	0.327146	0.469729	0.620657	0.72277	0.718741	0.584266	0.399451	0.264603	0.26504	0.391881	0.638902	0.887518	1.04556	1.00808	0.832289	0.565338	0.379077	0.268011	0.179909	0.085036	-0.00778682	-0.0650577	-0.0689175	-0.0477789	0.0176829	0.0426497	0.0702766	0.0935762	0.0718289	-0.0331499
1.51108	1.65165	1.69028	1.5407	1.27219	0.910749	0.666083	0.52019	0.404462	0.279841	0.157913	0.0826837	0.0776135	0.10538	0.191369	0.224164	0.260454	0.291059	0.262493	0.124597	-0.179816	-0.542799	-0.847444	-0.901436	-0.648249	-0.218231	0.168562	0.314915	0.229785	0.0238333	-0.123745	-0.153347	-0.12329	-0.0748143	0.024532	0.142706	0.401792	0.691358	0.989941	1.15646	1.27325	1.33167	1.35633	1.29509	1.04867	0.749948	0.469673	0.355467	0.375706	0.474293
0.279783	0.243037	0.234337	0.245299	0.310964	0.429745	0.495645	0.451132	0.245982	-0.075941	-0.422463	-0.739362	-0.931708	-0.975731	-0.859555	-0.644517	-0.404033	-0.212073	-0.115167	-0.0589796	0.0176217	0.182318	0.383418	0.538869	0.602806	0.588373	0.516926	0.469788	0.506522	0.545123	0.578099	0.565502	0.525589	0.446703	0.348808	0.239484	0.186432	0.168876	0.126526	0.0429288	-0.0325747	-0.0466704	-0.0176416	0.00300595	0.0239672	0.0477722	0.0485658	-0.00570521	-0.113065	-0.218669
0.107302	0.087968	0.104725	0.125677	0.0992864	0.0104307	-0.072952	-0.0885187	-0.0564605	-0.0336583	-0.0105097	0.0157795	0.016656	-0.0432786	-0.161841	-0.278466	-0.275985	-0.177674	-0.0194116	0.101012	0.146947	0.176193	0.185103	0.206003	0.215333	0.122667	0.0438534	0.0770701	0.272975	0.481854	0.52832	0.355969	0.00834705	-0.496884	-0.9869	-1.35596	-1.54925	-1.51614	-1.43329	-1.33331	-1.31841	-1.31912	-1.20846	-0.964634	-0.622087	-0.252076	0.0151843	0.0987232	0.0352431	-0.103901
-0.0438919	-0.219115	-0.348194	-0.462122	-0.519752	-0.541974	-0.507832	-0.404621	-0.218739	-0.0185414	0.114859	0.143993	0.0716022	-0.0370314	-0.162885	-0.192157	-0.10733	0.0542355	0.126272	0.115938	0.0726893	0.0448629	0.0151575	0.00602908	0.040477	0.141592	0.296623	0.464638	0.604123	0.691936	0.681559	0.600034	0.508254	0.433032	0.411327	0.477242	0.596448	0.666835	0.574445	0.367608	0.131792	-0.0296634	-0.0605512	0.0300495	0.205727	0.330591	0.373275	0.333518	0.278899	0.265338
0.383845	0.255601	0.050579	-0.158401	-0.375766	-0.560418	-0.656289	-0.729742	-0.768533	-0.769663	-0.756394	-0.744256	-0.759517	-0.802202	-0.763171	-0.688757	-0.591437	-0.460535	-0.329003	-0.229055	-0.26897	-0.355062	-0.511926	-0.665273	-0.73561	-0.633344	-0.340246	-0.000288375	0.273844	0.419107	0.444254	0.386487	0.300984	0.206759	0.0690831	-0.104277	-0.289008	-0.407507	-0.455583	-0.419928	-0.347557	-0.201459	-0.0872198	-0.0333634	-0.0463921	-0.0483077	-0.0155044	0.0211923	0.0444615	-0.00335272
-0.144338	-0.1688	-0.0868254	0.112384	0.322714	0.46464	0.423962	0.290358	0.203977	0.209383	0.285002	0.423428	0.595323	0.772957	0.909445	0.971996	0.915146	0.705417	0.428606	0.230394	0.173997	0.210084	0.25463	0.176122	0.0443469	-0.162494	-0.276502	-0.245151	-0.0880979	0.129366	0.344364	0.495112	0.50951	0.393299	0.171118	-0.0830692	-0.357858	-0.597304	-0.770776	-0.830684	-0.798941	-0.731127	-0.6246	-0.527709	-0.46464	-0.427615	-0.357313	-0.24259	-0.0683964	0.112303
0.233847	0.189912	0.219829	0.321111	0.4778	0.67379	0.866933	1.00506	1.05982	1.01454	0.872447	0.682103	0.475196	0.247168	0.108657	0.0387414	-0.00112622	-0.0402932	-0.0655144	-0.113272	-0.163893	-0.139272	-0.0288172	0.17084	0.377074	0.550249	0.701968	0.811777	0.88168	0.952739	1.00556	1.00471	1.0041	0.93433	0.845609	0.772251	0.715751	0.719021	0.762851	0.853253	0.961144	1.09208	1.19256	1.27794	1.25616	1.15066	0.975706	0.83393	0.841773	0.911788
0.820198	0.804539	0.82387	0.84727	0.833252	0.82547	0.749831	0.653651	0.574124	0.512874	0.516419	0.563934	0.661938	0.7789	0.920841	1.02977	1.12234	1.09872	0.984347	0.794687	0.640989	0.649492	0.725394	0.767349	0.75692	0.716675	0.687041	0.632004	0.559262	0.497216	0.495981	0.563085	0.716606	0.84131	0.80086	0.655025	0.448132	0.195262	-0.0490229	-0.261483	-0.374533	-0.350602	-0.288128	-0.19466	-0.148193	-0.130257	-0.139544	-0.148988	-0.187352	-0.249936
-0.871868	-0.885669	-0.862644	-0.763035	-0.630071	-0.469726	-0.335799	-0.233717	-0.175322	-0.193876	-0.316207	-0.566649	-0.8757	-1.19129	-1.41341	-1.48894	-1.46277	-1.32199	-1.11373	-0.854689	-0.605883	-0.409673	-0.243553	-0.0788676	0.0420663	0.086743	0.100333	0.0927715	0.069384	0.0811453	0.0833972	0.100025	0.0922493	0.0637844	0.0719518	0.0200884	-0.106875	-0.354527	-0.690015	-1.04655	-1.33185	-1.44012	-1.29482	-0.974278	-0.635964	-0.361583	-0.19181	-0.106581	-0.0627242	-0.0743368
0.688123	0.605789	0.555258	0.526138	0.493491	0.50675	0.509036	0.525913	0.518021	0.489127	0.497418	0.444773	0.315897	0.0645136	-0.276029	-0.637933	-0.92753	-1.03744	-0.889944	-0.564575	-0.221164	0.0573514	0.229682	0.316195	0.360713	0.348925	0.306048	0.176632	-0.0298779	-0.274361	-0.51081	-0.599613	-0.495847	-0.262415	-0.00928749	0.166046	0.262498	0.344578	0.400646	0.404272	0.364775	0.219953	0.0720395	-0.0898901	-0.199233	-0.199229	-0.111116	0.00874658	0.0740122	0.0807835
-0.301838	-0.215513	-0.202548	-0.237465	-0.34833	-0.504093	-0.677819	-0.859225	-1.0374	-1.18918	-1.26802	-1.24695	-1.17754	-1.07247	-0.964082	-0.821225	-0.675816	-0.545517	-0.562164	-0.741905	-0.972008	-1.11943	-1.11319	-0.932303	-0.651627	-0.408078	-0.222189	-0.096493	0.0517404	0.185695	0.345213	0.477995	0.566234	0.62463	0.642015	0.591892	0.526111	0.42275	0.325638	0.252618	0.133564	-0.04094	-0.273861	-0.534617	-0.747261	-0.87686	-0.965026	-0.982768	-0.988185	-0.953831
0.310323	0.434746	0.513375	0.484116	0.411741	0.34159	0.29635	0.373856	0.536881	0.796509	1.09363	1.21373	1.15968	0.974951	0.761946	0.627432	0.625736	0.63408	0.624791	0.471593	0.232044	0.0286832	-0.149503	-0.243548	-0.319324	-0.360042	-0.312662	-0.109887	0.22673	0.545189	0.748779	0.852806	0.957543	1.06202	1.18318	1.23324	1.23429	1.1623	1.09835	1.08465	1.10167	1.08043	0.974856	0.778963	0.583338	0.360585	0.289291	0.340899	0.526682	0.720972
0.0240726	-0.132798	-0.2362	-0.338133	-0.394112	-0.455672	-0.495587	-0.449141	-0.250365	0.0796149	0.391795	0.59137	0.693347	0.796018	0.898431	1.0172	1.06628	1.06731	0.996734	0.934045	0.920614	0.937302	0.916486	0.81299	0.620959	0.429191	0.210831	0.140942	0.191532	0.373652	0.564112	0.684324	0.711391	0.673352	0.629985	0.58331	0.501989	0.32731	0.116811	-0.0307245	-0.0523511	0.00519266	0.0625088	0.0322557	-0.104298	-0.276345	-0.381808	-0.320402	-0.0981803	0.101009
0.533886	0.402954	0.28034	0.168864	0.19653	0.280654	0.425329	0.602567	0.758592	0.913245	1.03534	1.11591	1.10066	0.964599	0.808552	0.733042	0.810936	0.997646	1.22031	1.36035	1.43698	1.41137	1.37572	1.33422	1.22129	1.14729	1.04396	0.90986	0.781319	0.754107	0.81915	0.933816	1.01557	1.03809	1.02226	0.939292	0.824347	0.690889	0.539214	0.419699	0.345396	0.399273	0.516627	0.694627	0.881513	0.990363	0.960983	0.873995	0.798614	0.78581
1.48522	1.26379	1.00486	0.811172	0.717481	0.793528	0.980675	1.20386	1.34423	1.42104	1.39537	1.35964	1.31804	1.20484	1.13067	1.0271	0.892683	0.763841	0.736566	0.801761	0.916695	0.998644	1.02122	1.00535	0.922185	0.806971	0.6732	0.521169	0.401375	0.326898	0.3809	0.49853	0.676947	0.86427	0.973375	0.943926	0.856735	0.781177	0.768343	0.834305	0.853811	0.764603	0.550659	0.303269	0.115887	0.0612786	0.162766	0.359088	0.582343	0.78706
0.0148656	0.177338	0.39175	0.588151	0.792077	0.910474	0.930493	0.766328	0.581524	0.381904	0.343666	0.403399	0.486003	0.50755	0.395688	0.173006	-0.122813	-0.422505	-0.582974	-0.539564	-0.350665	-0.0720549	0.184839	0.350569	0.360777	0.291092	0.184675	0.107629	0.0310209	-0.0988927	-0.197323	-0.310253	-0.414963	-0.525577	-0.618306	-0.717436	-0.802138	-0.823799	-0.817474	-0.769784	-0.740062	-0.697528	-0.622578	-0.587851	-0.604574	-0.71316	-0.782475	-0.72001	-0.481553	-0.259649
0.9247	0.777893	0.635052	0.515741	0.478823	0.563918	0.778731	0.940138	0.99026	0.926277	0.836676	0.763411	0.792533	0.845357	0.828815	0.716564	0.543082	0.429716	0.382572	0.400492	0.42583	0.416451	0.356557	0.307091	0.267833	0.257828	0.351063	0.529951	0.7939	1.03404	1.16009	1.14283	1.04437	0.971149	0.981025	1.00828	1.01366	0.946278	0.83002	0.658406	0.466111	0.297083	0.229831	0.293907	0.461655	0.616025	0.662179	0.612524	0.470471	0.339503
0.502413	0.521102	0.535632	0.580672	0.593369	0.59553	0.581401	0.641632	0.741171	0.803095	0.864262	0.896256	0.934229	0.90044	0.785744	0.591623	0.395974	0.264126	0.218665	0.272263	0.430299	0.609075	0.728464	0.81594	0.865878	0.969381	1.13504	1.34693	1.46506	1.45026	1.33723	1.21886	1.17476	1.24191	1.40015	1.51424	1.54983	1.49547	1.37834	1.2309	1.0273	0.868438	0.789952	0.792474	0.833703	0.830464	0.750266	0.556832	0.396717	0.270339
0.617731	0.618117	0.691481	0.719624	0.713005	0.591589	0.377172	0.118191	-0.184738	-0.459045	-0.669941	-0.800131	-0.817635	-0.671015	-0.399843	-0.14651	-0.0189329	-0.0927267	-0.256337	-0.430506	-0.535376	-0.605884	-0.595433	-0.435116	-0.17525	0.199837	0.623003	0.945273	1.13244	1.18571	1.13999	1.08313	1.06479	1.02053	1.00593	1.07056	1.17445	1.31868	1.37647	1.31841	1.20598	1.02125	0.781989	0.513424	0.274895	0.123539	0.0470487	0.0859707	0.182579	0.305682
-0.203939	-0.0437812	0.0113237	-0.0756807	-0.316896	-0.644293	-0.904253	-1.05033	-1.07838	-1.03231	-0.92562	-0.805144	-0.665878	-0.509852	-0.400621	-0.375429	-0.428457	-0.543917	-0.60157	-0.547675	-0.317058	0.0798543	0.453245	0.65973	0.629116	0.376558	0.0590258	-0.209024	-0.34484	-0.354475	-0.295699	-0.224905	-0.184064	-0.155028	-0.0943339	0.0421539	0.250073	0.461504	0.656102	0.796019	0.870964	0.881138	0.821213	0.703436	0.551915	0.427636	0.357567	0.32582	0.316276	0.27137
0.233148	0.519767	0.732453	0.824261	0.741453	0.483463	0.181826	-0.0728066	-0.201825	-0.210978	-0.155143	-0.0878934	-0.0490962	-0.0215142	0.0361423	0.165798	0.363309	0.564157	0.749015	0.881928	0.953122	0.962787	0.905861	0.793979	0.650043	0.531985	0.465424	0.435265	0.426199	0.38354	0.332171	0.213304	0.0922967	-0.0458776	-0.150326	-0.180273	-0.156621	-0.135766	-0.210308	-0.313504	-0.449229	-0.524827	-0.574606	-0.532399	-0.470105	-0.418865	-0.383403	-0.402182	-0.434772	-0.429654
0.498766	0.574497	0.666057	0.80574	0.904189	0.970771	0.912959	0.747399	0.508089	0.284062	0.242099	0.352814	0.552324	0.734088	0.866902	0.812384	0.608772	0.353267	0.137086	0.073832	0.124783	0.294861	0.405807	0.469423	0.449358	0.388798	0.313357	0.244663	0.16725	0.106254	0.0525229	0.0264509	0.0446554	0.117391	0.206633	0.240396	0.169597	0.120121	0.128799	0.231567	0.361331	0.452061	0.405446	0.256932	0.128545	0.118025	0.127355	0.0525347	-0.137201	-0.348482
0.0826074	0.0685363	-0.0362934	-0.164102	-0.26548	-0.278997	-0.183356	-0.0400685	0.129175	0.223793	0.217588	0.0857875	-0.0753119	-0.183473	-0.209209	-0.173888	-0.182186	-0.183947	-0.155871	0.00603139	0.286433	0.624777	0.811313	0.748257	0.453643	0.120257	-0.096766	-0.118959	0.0250382	0.141405	0.201766	0.172289	0.171548	0.26299	0.497248	0.799883	1.06022	1.18117	1.21054	1.09627	0.772464	0.361269	0.00252589	-0.167368	-0.128235	0.0464322	0.183362	0.226794	0.228087	0.254925
0.918903	0.88387	0.847733	0.762875	0.673098	0.628836	0.61051	0.560104	0.453575	0.303418	0.183331	0.0893198	0.0729848	0.171101	0.311672	0.355561	0.259129	0.0798197	-0.0513887	-0.0666507	0.0927069	0.368789	0.626936	0.761308	0.795371	0.764832	0.763631	0.782098	0.835775	0.832981	0.758766	0.608164	0.449067	0.358903	0.303445	0.329944	0.361821	0.389264	0.316426	0.183071	-0.0487291	-0.280964	-0.456341	-0.460228	-0.303927	-0.0579687	0.180034	0.354733	0.352521	0.245392
0.776966	0.680424	0.603056	0.575207	0.565795	0.520491	0.415863	0.268384	0.15044	0.0581061	0.0420626	0.138428	0.276492	0.319597	0.224885	0.0487755	-0.0800919	-0.0950816	0.0614328	0.33259	0.586131	0.718105	0.75156	0.721566	0.720386	0.738524	0.791243	0.7885	0.715609	0.567693	0.411435	0.32288	0.268411	0.294437	0.325745	0.352699	0.281161	0.150184	-0.0774798	-0.305571	-0.477819	-0.481637	-0.328125	-0.0865545	0.147202	0.318784	0.316612	0.211394	0.0812501	-0.0115142
-0.287166	-0.145916	0.0428794	0.219983	0.275419	0.180927	-0.00158136	-0.135131	-0.150665	0.0115357	0.292544	0.555296	0.692065	0.726736	0.695652	0.69443	0.713226	0.767861	0.765017	0.689478	0.536189	0.374254	0.282481	0.226033	0.253005	0.285451	0.313384	0.239247	0.103512	-0.132424	-0.368802	-0.547307	-0.551264	-0.392174	-0.141828	0.100421	0.278237	0.275985	0.166945	0.0320731	-0.0640614	-0.171058	-0.272874	-0.346901	-0.387615	-0.426121	-0.419775	-0.393388	-0.426388	-0.518391
0.815713	0.561667	0.282872	0.0230728	-0.134579	-0.156925	0.000482607	0.273186	0.528174	0.660901	0.694548	0.664383	0.663196	0.681436	0.734457	0.731698	0.658391	0.509632	0.352482	0.263421	0.208641	0.234816	0.266303	0.293411	0.221464	0.0897405	-0.139222	-0.368615	-0.541846	-0.545686	-0.391297	-0.148349	0.0867407	0.259302	0.257117	0.151299	0.020413	-0.0728805	-0.176715	-0.275522	-0.347362	-0.386872	-0.424241	-0.418082	-0.392475	-0.4245	-0.513784	-0.598705	-0.657588	-0.612342
-0.0644401	-0.00910521	0.0421498	0.071513	0.00931807	-0.019717	-0.064271	-0.0867205	-0.0585799	-0.00444792	0.017256	-0.0169339	-0.0434571	-0.0192917	0.0231639	0.0491236	0.0872703	0.147341	0.269544	0.428321	0.584407	0.688817	0.664739	0.522289	0.302104	0.175371	0.0621372	0.030227	0.0770492	0.119633	0.19089	0.350366	0.582594	0.792278	0.914058	0.842335	0.70614	0.513821	0.381303	0.33864	0.348621	0.446453	0.589729	0.647512	0.599413	0.472014	0.274532	0.104818	-0.0295285	-0.13649
-0.00262079	-0.0131574	-0.0118957	-0.0111919	-0.0599946	-0.13408	-0.191528	-0.174581	-0.0670289	0.0767203	0.216023	0.314376	0.402463	0.413999	0.418844	0.39545	0.380829	0.390776	0.420625	0.448117	0.434237	0.435112	0.425505	0.415325	0.383091	0.34174	0.33812	0.38552	0.557884	0.837627	1.13887	1.32044	1.36123	1.33491	1.26092	1.15122	1.03214	0.959919	0.914832	0.939561	0.962593	0.947492	0.944705	0.938489	0.987179	1.04397	1.08845	1.05118	0.904266	0.734597
0.21708	0.0541651	-0.0848794	-0.168888	-0.162137	-0.0573407	0.08915	0.231109	0.331339	0.421105	0.432861	0.437798	0.413958	0.399059	0.409195	0.439614	0.46763	0.453485	0.454377	0.444586	0.434212	0.401364	0.359224	0.355535	0.403838	0.57949	0.864568	1.17156	1.35659	1.39815	1.37133	1.29593	1.18414	1.06279	0.989193	0.943246	0.968447	0.991918	0.976528	0.973688	0.967354	1.01697	1.07484	1.12018	1.08219	0.932478	0.759574	0.644838	0.71222	0.925284
0.186938	0.223162	0.263454	0.308879	0.306574	0.174082	-0.119632	-0.448295	-0.6731	-0.787921	-0.820237	-0.818436	-0.764439	-0.685397	-0.515718	-0.296662	-0.0626738	0.0838182	0.217181	0.297518	0.295853	0.249438	0.181938	0.131051	0.150384	0.211101	0.26652	0.269679	0.261678	0.338827	0.479828	0.613023	0.676912	0.611377	0.391728	0.0314031	-0.31944	-0.560252	-0.707367	-0.691739	-0.555297	-0.385872	-0.272648	-0.147862	-0.0428966	0.14633	0.316701	0.402902	0.387175	0.24973
0.852154	0.701881	0.553097	0.473448	0.513633	0.637036	0.766605	0.828755	0.765004	0.551335	0.200819	-0.140472	-0.374729	-0.517838	-0.502636	-0.369909	-0.205096	-0.0949546	0.0264345	0.128542	0.312617	0.47835	0.562204	0.546906	0.413202	0.271109	0.169159	0.0942948	0.0479735	0.0504743	0.0451366	0.0454019	0.0691477	0.171561	0.406848	0.737856	1.00529	1.13552	1.11444	0.95668	0.743986	0.494388	0.302033	0.138656	0.026477	-0.0283764	-0.00413527	0.0658259	0.112702	0.125821
-0.114769	-0.135483	-0.126593	-0.123942	-0.123266	-0.0980442	0.00331975	0.236194	0.563809	0.828501	0.9574	0.936535	0.78039	0.569876	0.322837	0.132453	-0.0292484	-0.140278	-0.194569	-0.170576	-0.101332	-0.0549359	-0.0419514	-0.0655353	-0.0647224	-0.02619	0.0413594	0.108082	0.11298	0.0540785	-0.0606242	-0.212048	-0.302394	-0.35015	-0.369289	-0.392755	-0.446964	-0.447719	-0.388071	-0.313372	-0.197652	-0.0381514	0.128939	0.232383	0.195794	0.0587369	-0.112328	-0.196879	-0.211042	-0.192819
-1.05679	-0.935473	-0.798841	-0.678479	-0.596859	-0.562063	-0.556836	-0.560376	-0.645299	-0.805313	-0.984869	-1.10369	-1.1089	-0.836463	-0.3426	0.205648	0.657582	0.850786	0.745194	0.494914	0.200756	0.0425469	-0.0287359	-0.00900556	-0.0180846	-0.0924815	-0.175179	-0.182962	-0.051357	0.165591	0.403901	0.596992	0.711856	0.721529	0.654966	0.494508	0.255021	-0.127665	-0.510999	-0.827637	-0.98656	-1.04013	-0.942313	-0.774099	-0.598555	-0.504565	-0.491278	-0.606833	-0.821962	-1.03582
-0.0717117	-0.0166281	0.022499	0.0746595	0.0625221	0.0164701	-0.0821358	-0.196042	-0.344647	-0.472578	-0.585956	-0.72166	-0.901324	-1.13092	-1.23859	-1.17035	-0.857233	-0.442384	-0.0779424	0.128999	0.0979393	-0.0652648	-0.258391	-0.435415	-0.61358	-0.789372	-0.969103	-1.10631	-1.17705	-1.1819	-1.10652	-0.985197	-0.885097	-0.825304	-0.796187	-0.681638	-0.527263	-0.410821	-0.392988	-0.453422	-0.550328	-0.565259	-0.437282	-0.261171	-0.147255	-0.199307	-0.348444	-0.485653	-0.566738	-0.522823
0.106136	0.0397425	-0.0245825	-0.125108	-0.237462	-0.382093	-0.51161	-0.626394	-0.763781	-0.945673	-1.17811	-1.28712	-1.21804	-0.901035	-0.481041	-0.11208	0.0974274	0.0659825	-0.0992455	-0.294767	-0.473986	-0.65436	-0.832333	-1.01429	-1.1532	-1.22482	-1.22973	-1.15342	-1.03059	-0.929244	-0.86871	-0.839231	-0.723263	-0.566973	-0.449087	-0.431033	-0.492216	-0.590324	-0.605441	-0.475876	-0.297581	-0.182252	-0.23495	-0.385936	-0.524847	-0.606937	-0.562478	-0.440757	-0.312522	-0.219259
0.362636	0.239579	0.0741149	-0.170258	-0.431545	-0.629207	-0.711504	-0.673471	-0.513519	-0.35606	-0.222497	-0.163564	-0.136175	-0.14915	-0.165586	-0.205433	-0.261619	-0.339688	-0.436311	-0.561696	-0.725076	-0.864868	-0.912074	-0.82788	-0.676954	-0.475328	-0.296082	-0.122784	-0.0329777	-0.0683874	-0.2136	-0.392423	-0.526083	-0.587564	-0.599172	-0.602376	-0.63979	-0.687035	-0.699615	-0.665318	-0.625678	-0.643515	-0.727136	-0.825201	-0.866817	-0.805788	-0.706049	-0.561298	-0.365027	-0.18809
-0.770669	-0.807622	-0.778918	-0.684157	-0.510945	-0.352081	-0.219856	-0.161513	-0.134398	-0.147243	-0.163514	-0.202962	-0.258586	-0.335873	-0.431529	-0.555658	-0.717403	-0.855795	-0.902529	-0.819178	-0.669763	-0.470155	-0.292704	-0.121141	-0.0322339	-0.0672891	-0.211048	-0.388081	-0.520402	-0.581268	-0.59276	-0.595931	-0.632971	-0.679743	-0.692197	-0.658243	-0.619	-0.636658	-0.719442	-0.816525	-0.857725	-0.797307	-0.698567	-0.555264	-0.360958	-0.185793	-0.0525259	-0.0238172	-0.0453706	-0.0401443
-0.238563	-0.118652	-0.00420588	0.0907931	0.134742	0.193881	0.300109	0.467117	0.54844	0.575037	0.52676	0.382569	0.195919	-0.0713028	-0.348184	-0.620638	-0.838135	-0.96532	-1.00576	-0.999518	-0.952027	-0.865895	-0.775839	-0.695547	-0.624925	-0.516959	-0.409444	-0.340137	-0.305599	-0.294714	-0.360531	-0.437218	-0.535951	-0.641831	-0.785102	-0.85445	-0.8284	-0.702257	-0.578943	-0.566156	-0.664854	-0.825921	-0.891176	-0.805676	-0.594229	-0.396667	-0.260687	-0.248702	-0.281233	-0.328955
-0.790017	-0.598566	-0.418947	-0.332665	-0.298677	-0.298488	-0.359236	-0.467987	-0.552311	-0.598389	-0.510218	-0.309643	-0.0954676	0.0891464	0.211461	0.310416	0.403479	0.471201	0.430741	0.191478	-0.136172	-0.434774	-0.578682	-0.539135	-0.373581	-0.138984	0.155284	0.446581	0.664151	0.733419	0.573202	0.219691	-0.198104	-0.499151	-0.567895	-0.427219	-0.159667	0.0861814	0.220887	0.212796	0.145703	0.145867	0.235462	0.394609	0.529607	0.488297	0.280856	0.0108941	-0.129457	-0.183038
-0.0858468	-0.0322218	-0.0419969	-0.0679955	-0.10416	-0.0638448	0.103625	0.36423	0.600948	0.754032	0.776966	0.756052	0.715526	0.705797	0.642889	0.513441	0.314416	0.102841	-0.0715334	-0.173483	-0.254529	-0.30655	-0.299246	-0.212814	-0.061559	0.0613945	0.14913	0.118644	0.0407848	-0.0273521	-0.0397724	0.00713356	0.0969116	0.116433	0.0744447	0.0361036	0.0931298	0.270627	0.464781	0.579101	0.540918	0.331872	-0.0433404	-0.434434	-0.708597	-0.746552	-0.632865	-0.45065	-0.267867	-0.162099
1.06404	1.05963	1.04929	1.02097	1.00354	0.955585	0.926003	0.88844	0.867772	0.923077	1.01956	1.09344	1.1179	1.11584	1.14087	1.31925	1.58581	1.90177	2.11319	2.19308	2.16781	2.12208	2.11525	2.12126	2.02863	1.75662	1.35922	0.950742	0.707445	0.666543	0.689224	0.65995	0.46857	0.194068	-0.0309113	-0.0786543	0.0526608	0.269513	0.393589	0.355881	0.205227	0.131959	0.210692	0.469078	0.78209	1.02978	1.17443	1.21522	1.07618	0.831838
-0.156687	0.0543318	0.285571	0.505665	0.655629	0.72099	0.741166	0.805934	0.865956	0.922189	0.923171	0.924446	0.92807	0.944298	0.979993	1.01764	0.983616	0.831513	0.708572	0.614187	0.635022	0.737814	0.869047	0.939133	0.940922	0.798823	0.552205	0.295319	0.0629023	-0.0909478	-0.206269	-0.28126	-0.382758	-0.518494	-0.661958	-0.676557	-0.604917	-0.534349	-0.48529	-0.398097	-0.248186	-0.0882812	0.0443767	0.125744	0.129278	-0.0022974	-0.176287	-0.390316	-0.484894	-0.469219
0.946696	0.840364	0.762173	0.722263	0.673768	0.634931	0.610651	0.572758	0.460422	0.340431	0.260416	0.214321	0.151036	0.0339573	-0.13382	-0.371954	-0.593345	-0.744945	-0.789887	-0.76741	-0.694227	-0.578423	-0.451516	-0.372616	-0.348522	-0.450833	-0.635559	-0.881645	-1.17503	-1.40072	-1.51775	-1.47704	-1.35155	-1.13672	-0.902902	-0.635407	-0.339802	-0.100613	0.0899815	0.176492	0.132014	0.0824225	0.13787	0.352262	0.647426	0.956356	1.2434	1.40371	1.40837	1.19315
0.791234	0.645064	0.442146	0.28239	0.185482	0.12865	0.0656291	-0.0509609	-0.218038	-0.455178	-0.675645	-0.826612	-0.871366	-0.848984	-0.776106	-0.660785	-0.534408	-0.455837	-0.431844	-0.533728	-0.717683	-0.962742	-1.2549	-1.47965	-1.59619	-1.55566	-1.43068	-1.21675	-0.98391	-0.717531	-0.42316	-0.184969	0.00482958	0.0909787	0.0466868	-0.00269794	0.0525179	0.266015	0.559948	0.867588	1.15343	1.31308	1.31771	1.10339	0.74681	0.342192	-0.0396027	-0.373102	-0.655422	-0.906005
-0.795833	-0.678929	-0.543287	-0.411015	-0.331424	-0.304695	-0.407849	-0.594097	-0.84221	-1.13801	-1.36556	-1.48356	-1.44251	-1.31598	-1.09938	-0.863642	-0.593943	-0.295903	-0.0547432	0.137421	0.224644	0.1798	0.1298	0.185704	0.401862	0.699458	1.01093	1.30034	1.46198	1.46667	1.24968	0.88865	0.478988	0.0924349	-0.245222	-0.53106	-0.784766	-0.95305	-0.899913	-0.659757	-0.185437	0.406497	0.921186	1.24631	1.35214	1.30438	1.15592	0.925515	0.687456	0.447707
-0.387063	-0.520254	-0.691813	-0.918563	-1.19894	-1.42085	-1.54151	-1.49954	-1.37014	-1.14863	-0.907546	-0.631733	-0.326936	-0.080309	0.116212	0.205412	0.159551	0.108418	0.165589	0.386648	0.69099	1.00953	1.30549	1.4708	1.47559	1.25368	0.884471	0.465522	0.0702057	-0.275106	-0.567424	-0.826882	-0.998981	-0.944639	-0.699039	-0.213966	0.391388	0.917745	1.25024	1.35847	1.30962	1.1578	0.922172	0.678716	0.433532	0.282462	0.219966	0.256852	0.351648	0.528437
-0.73385	-0.694551	-0.637103	-0.593912	-0.514804	-0.385771	-0.233842	-0.111711	-0.0135274	0.0525839	0.124246	0.190738	0.216255	0.191603	0.146992	0.133237	0.204341	0.380514	0.573606	0.72744	0.792599	0.756704	0.65569	0.550176	0.516936	0.551938	0.60578	0.56192	0.459589	0.309842	0.0919009	-0.204288	-0.549357	-0.851742	-1.0596	-1.06467	-0.907667	-0.668877	-0.453328	-0.391099	-0.461144	-0.624222	-0.788622	-0.875351	-0.926141	-0.95012	-0.975332	-0.954148	-0.885204	-0.774024
0.00176486	0.0379224	0.107686	0.239144	0.454143	0.674439	0.841842	0.912748	0.873687	0.763763	0.648943	0.61277	0.650859	0.709451	0.661722	0.550365	0.387409	0.150244	-0.172071	-0.547577	-0.876635	-1.10283	-1.10835	-0.937493	-0.677641	-0.443078	-0.37536	-0.451583	-0.629047	-0.807947	-0.902326	-0.957597	-0.98369	-1.01113	-0.988074	-0.913048	-0.792062	-0.63114	-0.509244	-0.452301	-0.432628	-0.463463	-0.530671	-0.570379	-0.510477	-0.330585	-0.144855	-0.027786	-0.0350836	-0.145768
0.137527	0.313788	0.546151	0.762564	0.921979	0.989582	0.949218	0.835626	0.716974	0.679595	0.718955	0.779502	0.73018	0.615107	0.446714	0.201636	-0.131433	-0.519468	-0.859505	-1.09325	-1.09895	-0.922395	-0.653872	-0.411482	-0.341506	-0.420272	-0.603656	-0.788526	-0.886054	-0.943169	-0.970133	-0.998485	-0.974663	-0.897134	-0.772111	-0.60582	-0.479856	-0.421013	-0.400684	-0.432548	-0.501998	-0.543032	-0.48113	-0.295236	-0.10331	0.0176658	0.0101248	-0.104252	-0.21483	-0.277942
0.0958328	0.115254	0.152318	0.152438	0.107896	0.0178526	-0.0875631	-0.0889607	0.0154282	0.12057	0.110107	-0.0543603	-0.32144	-0.542261	-0.609112	-0.557581	-0.4644	-0.392509	-0.355977	-0.355624	-0.342369	-0.299122	-0.211928	-0.0699532	0.0943796	0.225471	0.267395	0.196733	-0.00126489	-0.293272	-0.640493	-0.959325	-1.14913	-1.32957	-1.46559	-1.53075	-1.50624	-1.32337	-1.04772	-0.748852	-0.47633	-0.282566	-0.218678	-0.15815	-0.0890079	-0.0175948	0.0386046	-0.0275652	-0.192873	-0.417831
-0.832565	-0.613447	-0.42631	-0.29041	-0.206082	-0.172054	-0.171677	-0.157531	-0.111377	-0.0183237	0.133193	0.30857	0.448471	0.493213	0.417802	0.206497	-0.105134	-0.47569	-0.81595	-1.01851	-1.21108	-1.35624	-1.42577	-1.39962	-1.20446	-0.910285	-0.591332	-0.300495	-0.0937093	-0.0255269	0.0390684	0.112858	0.18907	0.249046	0.17843	0.00201203	-0.238064	-0.556231	-0.864636	-1.03937	-1.03517	-0.938659	-0.835183	-0.828458	-0.924986	-1.03803	-1.08193	-1.07984	-1.05535	-1.04314
-1.12825	-1.31	-1.45774	-1.5306	-1.50493	-1.29417	-0.973186	-0.625166	-0.307824	-0.0821939	-0.00779794	0.062684	0.143198	0.226356	0.291798	0.214745	0.0222506	-0.239704	-0.586866	-0.923377	-1.11404	-1.10945	-1.00415	-0.891239	-0.883902	-0.989226	-1.11257	-1.16047	-1.1582	-1.13147	-1.11815	-1.08985	-0.967578	-0.720187	-0.483579	-0.42317	-0.60009	-0.909994	-1.21696	-1.45746	-1.52127	-1.38609	-1.10456	-0.734807	-0.249202	0.262973	0.77511	1.15639	1.32619	1.24827
-0.0590736	0.00642524	0.0597216	0.0183327	-0.118453	-0.335921	-0.527073	-0.580249	-0.456293	-0.220505	0.0399789	0.310563	0.488989	0.592129	0.634448	0.634554	0.633548	0.643249	0.659655	0.730388	0.807399	0.787305	0.606129	0.227516	-0.287736	-0.779372	-1.02451	-0.967201	-0.696615	-0.339628	0.0270097	0.349463	0.602768	0.719043	0.679961	0.53359	0.331138	0.173554	0.0861343	0.0847891	0.133011	0.160388	0.150295	0.140167	0.150745	0.113466	0.0117503	-0.126641	-0.232793	-0.269143
-0.877431	-0.726686	-0.504043	-0.247746	0.0103129	0.268881	0.446499	0.549172	0.591299	0.591405	0.590404	0.60006	0.616392	0.686805	0.763468	0.743465	0.563109	0.18621	-0.32671	-0.816121	-1.06015	-1.0031	-0.733739	-0.378367	-0.0133895	0.307605	0.559763	0.675512	0.636606	0.490898	0.289362	0.132491	0.0454675	0.0441284	0.0921316	0.119385	0.109338	0.099256	0.109786	0.0726751	-0.0285799	-0.166344	-0.272017	-0.308202	-0.306071	-0.256535	-0.169651	-0.0602076	0.0564607	0.148253
0.927862	1.10813	1.34333	1.48443	1.51226	1.30314	0.937627	0.466658	0.0203028	-0.348424	-0.533395	-0.452525	-0.116709	0.338938	0.778332	1.14242	1.32258	1.43912	1.46719	1.52289	1.58785	1.66046	1.72016	1.76188	1.82766	1.84538	1.84557	1.7669	1.60486	1.31816	0.968206	0.508175	0.0310684	-0.38838	-0.687544	-0.82472	-0.825168	-0.724308	-0.529915	-0.250826	0.0165278	0.178809	0.166768	-0.0840399	-0.447623	-0.86519	-1.18432	-1.33003	-1.21015	-0.884076
1.14143	1.21019	1.20793	1.23193	1.23266	1.27235	1.32967	1.39373	1.4464	1.48322	1.54125	1.55689	1.55705	1.48764	1.34467	1.09173	0.782962	0.37708	-0.0438678	-0.413944	-0.677895	-0.798924	-0.79932	-0.710331	-0.53882	-0.292581	-0.0566968	0.0864828	0.0758592	-0.145427	-0.466214	-0.834631	-1.11619	-1.24475	-1.13899	-0.851293	-0.420826	-0.0268176	0.247154	0.350742	0.340193	0.24399	0.177625	0.114076	0.0868791	0.0896968	0.0897265	0.0412149	-0.0562806	-0.21191
-0.515134	-0.574878	-0.614467	-0.651631	-0.639056	-0.572034	-0.474837	-0.379286	-0.297162	-0.208324	-0.149483	-0.140763	-0.155475	-0.17398	-0.168014	-0.147678	-0.203195	-0.326146	-0.526732	-0.691996	-0.727471	-0.621924	-0.429166	-0.18073	0.0615484	0.291351	0.479186	0.578092	0.558243	0.392431	0.109291	-0.175362	-0.429572	-0.582066	-0.616112	-0.582705	-0.540239	-0.511171	-0.479864	-0.435118	-0.376739	-0.302761	-0.249478	-0.208408	-0.192817	-0.199141	-0.210979	-0.234887	-0.256421	-0.298781
0.170281	0.204607	0.324872	0.499522	0.721678	0.927083	1.04982	1.02519	0.819425	0.468066	0.114829	-0.20063	-0.389865	-0.432114	-0.390659	-0.337961	-0.301889	-0.263039	-0.207512	-0.135067	-0.0432647	0.0228553	0.0738217	0.0931691	0.085321	0.070631	0.0409627	0.0142396	-0.0383262	-0.116778	-0.227894	-0.340392	-0.400698	-0.386782	-0.348488	-0.347369	-0.393725	-0.491565	-0.57947	-0.592869	-0.454115	-0.173268	0.0584873	0.162407	0.114127	-0.0302598	-0.249948	-0.430074	-0.489641	-0.456299
1.25181	1.21662	1.08533	0.831619	0.463998	0.105065	-0.21662	-0.409589	-0.452672	-0.410398	-0.356661	-0.319877	-0.28026	-0.223638	-0.149763	-0.0561491	0.0112757	0.0632478	0.082977	0.074974	0.0599941	0.0297404	0.00248997	-0.0511131	-0.131113	-0.244422	-0.35914	-0.420635	-0.406445	-0.367395	-0.366254	-0.413525	-0.513296	-0.602936	-0.616599	-0.475107	-0.188717	0.0476108	0.153581	0.104348	-0.0428876	-0.266911	-0.450591	-0.511333	-0.477333	-0.428327	-0.402707	-0.4364	-0.510282	-0.592668
-0.565359	-0.576095	-0.591776	-0.529032	-0.482512	-0.474325	-0.545928	-0.605659	-0.577072	-0.411009	-0.222782	-0.112444	-0.143315	-0.247573	-0.266604	-0.181877	-0.0335486	0.10487	0.127024	-0.00402995	-0.250069	-0.483053	-0.619525	-0.595314	-0.428754	-0.166439	0.143423	0.419149	0.592566	0.612153	0.499822	0.309528	0.104317	-0.0241162	-0.0588917	-0.0104376	0.0366936	0.0515768	0.0905765	0.204547	0.333511	0.412275	0.401494	0.265426	-0.0262153	-0.383851	-0.658821	-0.744489	-0.660928	-0.437634
-0.208103	-0.364118	-0.465902	-0.510964	-0.435564	-0.239142	0.0386023	0.366691	0.658635	0.842251	0.86299	0.744052	0.542565	0.325284	0.189296	0.152476	0.20378	0.253683	0.269442	0.310735	0.431409	0.567959	0.651356	0.63994	0.495869	0.187074	-0.191597	-0.482741	-0.573448	-0.484972	-0.248544	0.0755576	0.40278	0.671611	0.836113	0.886076	0.88556	0.769708	0.517122	0.216338	-0.0493279	-0.141783	-0.01273	0.337563	0.901578	1.50841	2.02414	2.30636	2.22415	1.7197
0.143829	0.256187	0.420293	0.569644	0.655323	0.64202	0.501737	0.201061	-0.167653	-0.45114	-0.539463	-0.453313	-0.223102	0.0924774	0.411095	0.672857	0.833033	0.881683	0.88118	0.768375	0.52243	0.229556	-0.0291241	-0.119148	0.00651139	0.347593	0.896778	1.48766	1.98983	2.26462	2.18457	1.69339	0.93723	0.148837	-0.464363	-0.757951	-0.665564	-0.321712	-0.00224335	0.121201	-0.0440514	-0.333422	-0.650241	-0.83856	-0.856507	-0.686763	-0.446996	-0.200879	-0.0621603	-0.0380023
0.610974	0.589304	0.451015	0.148881	-0.219798	-0.510136	-0.604633	-0.51246	-0.266153	0.0714906	0.412385	0.692449	0.863824	0.915876	0.915337	0.794645	0.531505	0.218154	-0.058613	-0.154932	-0.0204859	0.344443	0.932025	1.56422	2.1015	2.3955	2.30985	1.78433	0.975306	0.131791	-0.524283	-0.838398	-0.73955	-0.371657	-0.0298528	0.102222	-0.0745839	-0.384187	-0.723157	-0.924643	-0.943845	-0.762232	-0.505701	-0.242376	-0.0939589	-0.0681119	-0.0920573	-0.0563653	0.0483179	0.131121
0.381632	0.256251	0.18809	0.198943	0.304523	0.477973	0.647139	0.760988	0.788923	0.74642	0.734299	0.767607	0.820569	0.875413	0.899927	0.867742	0.822018	0.770648	0.691457	0.587276	0.427048	0.237268	0.0859598	0.0314179	0.132122	0.349478	0.58564	0.782938	0.893082	0.926139	0.900042	0.807757	0.63856	0.337398	-0.0262085	-0.378336	-0.585033	-0.59945	-0.438065	-0.218647	-0.00832519	0.0908648	0.117099	0.0929889	0.0409193	0.00877895	0.00306278	0.0128597	0.0818707	0.174887
0.318152	0.202886	0.0424278	-0.145832	-0.298265	-0.349563	-0.239568	-0.00215817	0.255792	0.471293	0.591598	0.627705	0.5992	0.498401	0.313594	-0.0153526	-0.412506	-0.797121	-1.02289	-1.03863	-0.86236	-0.622699	-0.392972	-0.284631	-0.255977	-0.282311	-0.339185	-0.37429	-0.380534	-0.369833	-0.294455	-0.192857	-0.105103	-0.108712	-0.192407	-0.315937	-0.388364	-0.343578	-0.206097	-0.0584924	-0.0256865	-0.170196	-0.449489	-0.739767	-1.00439	-1.10789	-1.10446	-1.0477	-0.947742	-0.801198
-0.416222	-0.364608	-0.380871	-0.406731	-0.45567	-0.514459	-0.550772	-0.55723	-0.546161	-0.468191	-0.363099	-0.272326	-0.276059	-0.362633	-0.490412	-0.56533	-0.519003	-0.376794	-0.224112	-0.190178	-0.339658	-0.628557	-0.928819	-1.20254	-1.30961	-1.30605	-1.24734	-1.14395	-0.992362	-0.772547	-0.537492	-0.285485	-0.0628674	0.0734387	0.113574	0.0297161	-0.192984	-0.485002	-0.686976	-0.698276	-0.545663	-0.340418	-0.0966721	0.195159	0.469913	0.603452	0.606714	0.488354	0.333092	0.192193
0.162548	0.203192	0.276658	0.42293	0.654315	0.905506	1.03763	1.04086	0.923751	0.770129	0.630719	0.569808	0.588639	0.621263	0.63151	0.51401	0.263676	-0.0367175	-0.259807	-0.29151	-0.125319	0.162971	0.446376	0.556743	0.462745	0.284814	0.167271	0.185357	0.279339	0.346021	0.284389	0.0595395	-0.253821	-0.472106	-0.562582	-0.564382	-0.574034	-0.663452	-0.783096	-0.901421	-0.957168	-0.989216	-1.03021	-1.10363	-1.17814	-1.27678	-1.32072	-1.28387	-1.14565	-0.939012
1.48258	1.29268	1.11529	0.917539	0.7392	0.59923	0.539721	0.558119	0.589993	0.600004	0.485208	0.240634	-0.0528468	-0.270802	-0.301777	-0.139409	0.142247	0.419129	0.526958	0.435122	0.261286	0.146448	0.164117	0.255937	0.321085	0.260871	0.0411951	-0.264955	-0.478216	-0.566611	-0.568369	-0.577799	-0.665159	-0.78205	-0.897652	-0.952116	-0.983427	-1.02347	-1.09521	-1.16801	-1.26438	-1.3073	-1.2713	-1.13626	-0.934379	-0.672787	-0.409006	-0.219972	-0.114119	-0.0639423
0.196501	0.093407	-0.0167234	-0.105591	-0.21208	-0.379651	-0.666907	-1.01383	-1.3266	-1.50162	-1.57199	-1.59546	-1.6544	-1.82807	-2.08995	-2.43235	-2.83168	-3.27036	-3.59691	-3.72844	-3.65224	-3.46847	-3.26081	-3.05298	-2.77397	-2.33998	-1.81138	-1.29224	-0.923799	-0.815068	-1.00993	-1.427	-1.9207	-2.36293	-2.68112	-2.76102	-2.65298	-2.43886	-2.21251	-2.02837	-1.90413	-1.78803	-1.72833	-1.61407	-1.40155	-1.15455	-0.958063	-0.872741	-0.890824	-0.982071
0.131024	0.229272	0.279874	0.285946	0.25323	0.188777	0.158076	0.153315	0.162354	0.165754	0.162941	0.180204	0.194726	0.175811	0.09546	-0.0276262	-0.182653	-0.282663	-0.339867	-0.328052	-0.291195	-0.247983	-0.184511	-0.127341	-0.120641	-0.160147	-0.199962	-0.219046	-0.170044	-0.0511973	0.0811431	0.215379	0.32138	0.425841	0.502225	0.549186	0.542734	0.481533	0.340193	0.197883	0.0674907	-0.0357392	-0.125601	-0.221958	-0.272799	-0.254841	-0.16295	-0.0339164	0.08553	0.146998
0.74584	0.850475	0.976284	1.06899	1.1303	1.12377	1.04322	0.857195	0.669893	0.498276	0.362409	0.244137	0.117315	0.0504017	0.0740369	0.19498	0.364808	0.522018	0.602919	0.639536	0.606179	0.566404	0.476592	0.40856	0.377183	0.408321	0.48375	0.521326	0.508845	0.415112	0.273557	0.184867	0.156277	0.224355	0.350838	0.473197	0.560776	0.626569	0.62526	0.602333	0.5474	0.552426	0.635564	0.778404	0.962663	1.10676	1.15451	1.10423	1.02228	1.00623
-1.77081	-1.84301	-1.83074	-1.85166	-1.85796	-1.91495	-1.98218	-1.97646	-1.88063	-1.64808	-1.34621	-1.07264	-0.92987	-0.874652	-0.882417	-0.900729	-0.925696	-1.02836	-1.18341	-1.39287	-1.59042	-1.71752	-1.71091	-1.57141	-1.38899	-1.25399	-1.11854	-0.977218	-0.764438	-0.496784	-0.26328	-0.158641	-0.282101	-0.58621	-0.98314	-1.3417	-1.56071	-1.64608	-1.66214	-1.61939	-1.61366	-1.71078	-1.86365	-2.09391	-2.29096	-2.37036	-2.28531	-2.01845	-1.71972	-1.46445
-0.16334	-0.0392375	0.119749	0.260002	0.316255	0.210267	-0.0269877	-0.336657	-0.616395	-0.787252	-0.853857	-0.866392	-0.833037	-0.828566	-0.904339	-1.0236	-1.20324	-1.35697	-1.41891	-1.35256	-1.14437	-0.911307	-0.712154	-0.545405	-0.415298	-0.34795	-0.320873	-0.367439	-0.463521	-0.568704	-0.631721	-0.595952	-0.502584	-0.352928	-0.223277	-0.133223	-0.157137	-0.267704	-0.403601	-0.449775	-0.342453	-0.231246	-0.170751	-0.205518	-0.311831	-0.419441	-0.507412	-0.584735	-0.653343	-0.692299
-0.471567	-0.611575	-0.735991	-0.801531	-0.823914	-0.81976	-0.78614	-0.781633	-0.858009	-0.978214	-1.15929	-1.31424	-1.37667	-1.3098	-1.09995	-0.865032	-0.664295	-0.496221	-0.365079	-0.297196	-0.269904	-0.316839	-0.413685	-0.519704	-0.583223	-0.54717	-0.453059	-0.302213	-0.171531	-0.0807617	-0.104865	-0.216312	-0.353289	-0.39983	-0.291654	-0.179564	-0.118587	-0.153631	-0.260789	-0.369255	-0.457925	-0.535863	-0.605017	-0.644282	-0.627551	-0.538295	-0.366694	-0.170995	0.0736885	0.316438
-0.0115287	0.046201	0.238938	0.530082	0.842287	1.00453	0.989393	0.833339	0.698041	0.677046	0.755343	0.899775	1.02983	1.13427	1.1979	1.27893	1.35032	1.36324	1.32423	1.28987	1.33868	1.51595	1.75331	1.96081	2.04666	1.95445	1.81114	1.64844	1.48952	1.25255	0.883258	0.419702	-0.0472517	-0.43259	-0.681579	-0.825767	-0.902121	-0.869003	-0.775478	-0.605589	-0.398919	-0.180762	-0.00807262	0.0911566	0.144363	0.130032	0.0996994	0.0104354	-0.0930797	-0.202414
-0.26095	-0.31521	-0.375778	-0.443186	-0.532442	-0.605296	-0.669905	-0.722658	-0.743173	-0.764859	-0.800918	-0.837717	-0.865753	-0.841744	-0.781826	-0.706692	-0.678194	-0.658437	-0.637825	-0.584944	-0.565165	-0.55361	-0.549387	-0.514861	-0.411242	-0.257581	-0.0972507	0.0116793	0.0899574	0.102019	0.0751931	-0.0141032	-0.0481777	0.00269308	0.153077	0.340272	0.448946	0.440633	0.35371	0.23042	0.125534	0.0777591	0.040025	0.00838112	-0.0398913	-0.0845857	-0.147568	-0.285486	-0.494133	-0.714592
-0.495134	-0.516969	-0.485879	-0.379623	-0.21711	-0.0516273	0.0643395	0.147674	0.160515	0.131956	0.0368916	0.000615859	0.0547728	0.214871	0.414159	0.529853	0.521004	0.428465	0.297211	0.185549	0.134688	0.0945164	0.0608283	0.00943751	-0.0381441	-0.105196	-0.252023	-0.474148	-0.708848	-0.903895	-1.0011	-0.972963	-0.856347	-0.693327	-0.539066	-0.419249	-0.354452	-0.299581	-0.245281	-0.179166	-0.153914	-0.182618	-0.26997	-0.433134	-0.628671	-0.791112	-0.819616	-0.746491	-0.584348	-0.405799
0.599242	0.521657	0.440114	0.352863	0.285324	0.198156	0.0215095	-0.245727	-0.528093	-0.762752	-0.879703	-0.845848	-0.705548	-0.509419	-0.323829	-0.179679	-0.101722	-0.0357072	0.0296204	0.109163	0.139543	0.105009	-8.29025e-05	-0.196384	-0.431633	-0.627065	-0.661358	-0.573382	-0.378308	-0.163498	-0.00652715	0.0646329	0.0668586	0.0418585	0.055587	0.150123	0.242455	0.312294	0.239629	0.0793909	-0.135021	-0.328329	-0.410234	-0.373277	-0.188172	0.0381248	0.243672	0.310791	0.236165	0.0993381
0.560231	0.40336	0.152042	-0.165152	-0.487261	-0.750171	-0.88107	-0.843177	-0.686145	-0.466626	-0.258903	-0.0975615	-0.0103078	0.0635802	0.136699	0.225727	0.25973	0.221079	0.103453	-0.116259	-0.379563	-0.598302	-0.636684	-0.538217	-0.319879	-0.0794509	0.0962403	0.175887	0.178378	0.150396	0.165762	0.271572	0.374916	0.453083	0.371753	0.192405	-0.0475782	-0.263939	-0.355612	-0.314247	-0.107068	0.146217	0.376278	0.451401	0.367876	0.214731	0.146402	0.210546	0.393258	0.598111
1.26449	1.15838	0.888626	0.491728	0.00588546	-0.516455	-0.963339	-1.34505	-1.59001	-1.7659	-1.93411	-2.10684	-2.25873	-2.39414	-2.42037	-2.30119	-2.0089	-1.70845	-1.53018	-1.50501	-1.63492	-1.83567	-1.97464	-1.94733	-1.71155	-1.34678	-0.99816	-0.777046	-0.819219	-1.08055	-1.39911	-1.58779	-1.6431	-1.52999	-1.27206	-1.00869	-0.703696	-0.433847	-0.0807594	0.347602	0.803765	1.09292	1.14882	0.961813	0.683457	0.494172	0.418016	0.412084	0.429091	0.423237
-1.32921	-1.11175	-0.958958	-0.882494	-0.896755	-1.00574	-1.15466	-1.25774	-1.23749	-1.06258	-0.791996	-0.533392	-0.369369	-0.400654	-0.594509	-0.830818	-0.970781	-1.0118	-0.927905	-0.73657	-0.541205	-0.314959	-0.114786	0.147134	0.464892	0.803273	1.01777	1.05923	0.920513	0.714029	0.573618	0.517126	0.512725	0.52534	0.520998	0.50202	0.424217	0.320595	0.240623	0.262309	0.38438	0.552069	0.673753	0.733898	0.700953	0.636068	0.573887	0.527537	0.495624	0.482845
0.308892	0.304347	0.345861	0.507722	0.760934	1.05666	1.25369	1.29177	1.16435	0.974682	0.845707	0.793816	0.789774	0.801362	0.797373	0.779941	0.708474	0.613292	0.539833	0.559753	0.671882	0.825913	0.937686	0.992933	0.962672	0.903071	0.845954	0.803379	0.774066	0.762327	0.762742	0.863832	1.06723	1.29387	1.44682	1.43578	1.32594	1.16542	1.03441	0.98946	1.02176	1.10995	1.22616	1.36223	1.53761	1.7482	1.9274	2.025	2.02116	1.91319
0.522654	0.135699	-0.260992	-0.633483	-0.956483	-1.1612	-1.27997	-1.35315	-1.45591	-1.56766	-1.59598	-1.50679	-1.26833	-0.99364	-0.743067	-0.526598	-0.273074	0.0370991	0.403402	0.800181	1.20073	1.6004	1.93498	2.17726	2.26454	2.22537	2.1265	1.97574	1.73231	1.37168	0.881341	0.299196	-0.305451	-0.857113	-1.20113	-1.35053	-1.32105	-1.23544	-1.18059	-1.15461	-1.1021	-1.00118	-0.8519	-0.674657	-0.504608	-0.394455	-0.324597	-0.259289	-0.174684	-0.106402
-1.01646	-0.901042	-0.776592	-0.646307	-0.516315	-0.395314	-0.319341	-0.27116	-0.226117	-0.167765	-0.12067	-0.0882929	-0.0809424	-0.0432207	0.00974467	0.0911182	0.1804	0.215975	0.133908	-0.0418105	-0.236183	-0.382969	-0.429519	-0.444635	-0.450583	-0.479684	-0.555049	-0.60735	-0.633411	-0.620072	-0.525108	-0.385294	-0.256896	-0.152404	-0.134271	-0.158093	-0.240209	-0.348557	-0.426809	-0.439517	-0.415515	-0.36329	-0.274617	-0.144161	-0.0234565	0.0385284	0.013513	-0.0664091	-0.143181	-0.179961
-0.327372	-0.490519	-0.549689	-0.498178	-0.340185	-0.131972	-0.00582164	0.0282213	-0.0606826	-0.147524	-0.226904	-0.24441	-0.298819	-0.335872	-0.399545	-0.415076	-0.366852	-0.27594	-0.200845	-0.186322	-0.262892	-0.363383	-0.385468	-0.331083	-0.198594	-0.0987325	-0.0986549	-0.102713	-0.057803	0.0871661	0.220808	0.275784	0.13332	-0.190859	-0.555558	-0.908545	-1.16128	-1.26165	-1.14603	-0.886142	-0.558175	-0.318353	-0.149756	-0.0433057	-0.0164987	0.000375706	-0.019193	-0.0987124	-0.157887	-0.164556
-0.028007	-0.000416636	0.103889	0.300155	0.455972	0.521558	0.37013	0.0255535	-0.362093	-0.737289	-1.00593	-1.11262	-0.989722	-0.713477	-0.364874	-0.109963	0.0692432	0.182391	0.210885	0.228821	0.208021	0.123498	0.0606	0.0535114	0.0988461	0.153485	0.165163	0.111216	-0.0374908	-0.235462	-0.452693	-0.659811	-0.870979	-0.999557	-1.0298	-0.927922	-0.666114	-0.394275	-0.165132	-0.0266346	0.0781382	0.101981	0.0763902	0.00944991	-0.00770561	-0.0122849	-0.0836267	-0.157028	-0.253691	-0.259012
[truncated: 11,831 more rows]
[truncated: 91 more columns]

## Sheet: C-CIE
0.38044	0.366304	0.374059	0.33201	0.273919	0.241703	0.150499	-0.0308881	-0.213857	-0.408288	-0.481991	-0.453948	-0.315268	-0.120145	0.00503467	0.0139527	-0.0478667	-0.0499639	-0.00228979	0.117962	0.223036	0.261866	0.222555	0.14832	0.0831392	-0.0434285	-0.228114	-0.439819	-0.524242	-0.462546	-0.255104	-0.00180445	0.135393	0.0679128	-0.190191	-0.53553	-0.797795	-0.876467	-0.79504	-0.585202	-0.364915	-0.201566	-0.182664	-0.256208	-0.365066	-0.44258	-0.515994	-0.608008	-0.720335	-0.896086
[truncated: 14,870 more rows]
[truncated: 91 more columns]

[truncated: 2 more sheets: D-Air, D-CIE]
