# Supplementary material for: Mechanism for differential recruitment of orbitostriatal transmission during actions and outcomes following chronic alcohol exposure
Source: eLife. 2021 Mar 17;10:e67065. doi: 10.7554/eLife.67065 (PMC8016477; doi:10.7554/eLife.67065)
Supplement: Figure 1—figure supplement 1—source data 2. [file elife-67065-fig1-figsupp1-data2.xlsx]

## Sheet: E-Rewarded
0.809231	-0.746872	-0.483051	-0.183749	0.147673	0.379724	0.519038	0.5352	0.46133	0.337838	0.207289	0.160526	0.167447	0.18406	0.239171	0.402505	0.595183	0.804768	0.992365	1.15703	1.30834	1.42639	1.57344	1.71165	1.7931	1.74178	1.58433	1.3484	1.08278	0.904617	0.828776	0.827099	0.863706	0.864213	0.825245	0.789639	0.777209	0.791695	0.838462	0.895916	0.958377	0.984811	0.999297	1.00145	1.03913	1.04658	1.06815	1.0963	1.10342	1.08607
-0.122983	-0.26131	-0.415254	-0.599757	-0.747976	-0.776855	-0.717103	-0.606436	-0.484949	-0.393606	-0.347393	-0.365328	-0.4272	-0.517256	-0.628337	-0.779626	-0.844395	-0.841549	-0.714843	-0.536041	-0.404138	-0.374584	-0.450953	-0.597679	-0.6763	-0.65191	-0.556115	-0.402766	-0.248803	-0.0914419	0.00035828	0.0154098	-0.0513881	-0.184744	-0.346039	-0.451928	-0.539767	-0.616743	-0.691346	-0.713276	-0.726804	-0.717717	-0.74407	-0.820403	-0.943633	-1.05473	-1.13828	-1.18389	-1.16647	-1.0684
0.987074	0.936522	0.842212	0.675613	0.491552	0.333913	0.217714	0.114445	0.0766764	0.0864739	0.19758	0.315836	0.38741	0.403859	0.305434	0.139996	0.00590262	-0.105812	-0.163175	-0.129322	0.0555659	0.275688	0.463816	0.607681	0.795577	1.03533	1.34562	1.65974	1.92269	2.09462	2.12375	2.15386	2.15828	2.07874	1.83232	1.46204	1.11591	0.908034	0.940265	1.15613	1.43326	1.68332	1.88339	1.99517	2.10685	2.17954	2.23371	2.24802	2.13642	1.98451
0.309287	0.326675	0.340855	0.397517	0.421807	0.406058	0.344502	0.26694	0.216777	0.171998	0.111169	0.031476	-0.0194761	-0.0609254	-0.0942944	-0.153484	-0.137661	-0.0806801	0.0337293	0.211065	0.509263	0.799737	1.05743	1.22735	1.30624	1.26181	1.15911	1.06476	0.962945	0.887208	0.826744	0.797971	0.778069	0.781607	0.820563	0.890697	0.999277	1.16962	1.31998	1.37589	1.30879	1.15462	1.04222	1.03683	1.23978	1.55151	1.79838	1.85721	1.74634	1.59809
-0.871176	-0.703027	-0.573098	-0.459548	-0.38805	-0.346639	-0.381601	-0.423443	-0.464636	-0.451116	-0.39305	-0.256939	-0.0779107	0.100992	0.25184	0.404709	0.528209	0.565417	0.542084	0.465479	0.361241	0.201933	0.089053	0.0493488	0.0719836	0.114979	0.153498	0.199132	0.207391	0.233692	0.229599	0.200241	0.136428	0.044675	-0.0482657	-0.0762183	-0.0388473	0.089023	0.156846	0.189729	0.23514	0.361108	0.506703	0.645198	0.667086	0.636758	0.625778	0.614151	0.63081	0.680844
0.546918	0.839815	1.11836	1.29628	1.40773	1.47338	1.53318	1.5697	1.58284	1.55205	1.48636	1.43598	1.38464	1.44411	1.55339	1.62992	1.59965	1.45838	1.29672	1.229	1.28832	1.40674	1.59131	1.67308	1.67711	1.53954	1.34469	1.15175	1.05676	1.08557	1.19793	1.29428	1.38033	1.3872	1.26925	1.07621	0.864501	0.743768	0.733921	0.881514	1.1163	1.31349	1.4124	1.41087	1.3381	1.30057	1.29599	1.2928	1.37444	1.45051
0.159056	0.155254	0.166927	0.198016	0.21893	0.222333	0.22632	0.260119	0.311133	0.359783	0.381819	0.370755	0.420103	0.593531	0.8658	1.21707	1.47341	1.53515	1.36316	1.05643	0.724115	0.467862	0.335588	0.31159	0.327639	0.367668	0.401863	0.421406	0.486243	0.558837	0.603603	0.623025	0.579227	0.496106	0.466145	0.458903	0.531502	0.613968	0.636708	0.631218	0.555371	0.507559	0.511064	0.544137	0.569346	0.574087	0.509657	0.364506	0.158871	-0.0339068
-1.12278	-1.00644	-0.718351	-0.244404	0.33246	0.823752	1.13701	1.25686	1.20349	1.06639	0.899137	0.73501	0.563449	0.496683	0.494842	0.539602	0.49086	0.279112	0.00424786	-0.175431	-0.0875683	0.175668	0.535265	0.814078	0.850933	0.74779	0.646233	0.613803	0.739338	0.874821	0.945574	0.89728	0.753257	0.599227	0.432241	0.356517	0.405216	0.574741	0.818659	1.12602	1.35456	1.53674	1.57194	1.49552	1.46972	1.48204	1.43852	1.31475	1.03644	0.738342
0.605911	0.632833	0.564781	0.380486	0.165868	-0.066159	-0.223226	-0.215808	-0.0979522	-0.00346553	-0.00959528	-0.104169	-0.243796	-0.365379	-0.451112	-0.492505	-0.487603	-0.461679	-0.407208	-0.315006	-0.204404	-0.0516292	0.0989225	0.274318	0.523806	0.771772	0.945119	1.00396	1.00394	1.05905	1.09299	1.14929	1.15537	1.16168	1.14664	1.10665	1.0529	0.972192	0.871678	0.799963	0.823661	0.865025	0.906123	0.93984	0.986164	1.09525	1.29905	1.56921	1.82261	2.04634
-0.000163776	0.0718948	0.218505	0.405131	0.644419	0.825184	0.991457	1.05328	1.04723	0.971012	0.887249	0.854718	0.828292	0.744722	0.542015	0.198647	-0.207057	-0.503287	-0.616827	-0.553175	-0.377313	-0.13498	0.109564	0.268738	0.326751	0.380851	0.492776	0.640886	0.845695	1.04962	1.15368	1.17172	1.15043	1.14651	1.18522	1.20667	1.2434	1.25494	1.20039	1.07302	0.908593	0.754557	0.688146	0.702157	0.781516	0.915505	1.03702	1.13499	1.24039	1.21771
0.553115	0.730796	0.841729	0.864823	0.849514	0.817293	0.800451	0.735412	0.645591	0.547892	0.473071	0.406103	0.405553	0.401163	0.405771	0.392947	0.377796	0.34676	0.244661	0.0456609	-0.184798	-0.362694	-0.403123	-0.290308	-0.094169	0.0945989	0.247761	0.309628	0.344668	0.362084	0.46049	0.616367	0.810662	0.996029	1.12399	1.2118	1.22949	1.24798	1.26618	1.30633	1.29962	1.28431	1.20449	1.09461	0.991173	0.917477	0.882706	0.84717	0.853165	0.841887
-0.0988819	-0.0932916	-0.0519893	-0.00317898	0.0153411	-0.0599484	-0.216678	-0.405164	-0.571234	-0.601926	-0.53063	-0.408008	-0.283483	-0.24148	-0.240756	-0.274105	-0.301265	-0.371324	-0.491003	-0.648798	-0.756346	-0.76354	-0.659928	-0.429663	-0.221631	-0.0940423	-0.0648625	-0.0937016	-0.0799471	-0.0298899	0.021826	0.146541	0.257426	0.321241	0.269424	0.132717	-0.00204763	-0.0238976	0.101015	0.392372	0.706641	0.89426	0.949433	0.834143	0.599652	0.368746	0.234629	0.183059	0.194221	0.178902
-0.430994	-0.209515	0.0584798	0.31272	0.54082	0.70298	0.792474	0.769476	0.695453	0.559582	0.495939	0.589392	0.834896	1.05354	1.11062	0.935498	0.658085	0.416841	0.320256	0.392533	0.599833	0.847205	1.03992	1.22191	1.25743	1.19756	1.0708	0.960002	0.902394	0.879922	0.886027	0.892056	0.910173	0.851225	0.848662	0.855548	0.851878	0.826045	0.76824	0.755248	0.773282	0.869937	0.929053	0.904141	0.829976	0.775432	0.808234	1.00144	1.27785	1.50712
-1.13552	-0.917519	-0.566716	-0.156023	0.191473	0.364428	0.347496	0.166056	-0.151045	-0.520392	-0.780512	-0.912277	-0.882594	-0.750977	-0.564792	-0.275897	0.0982839	0.421902	0.596339	0.524876	0.3379	0.0841122	-0.0992621	-0.130053	-0.0330591	0.0598208	0.147653	0.203918	0.219231	0.174597	0.0715247	-0.0241141	-0.00482103	0.145356	0.338843	0.55529	0.754141	0.901217	0.95702	0.952376	0.799837	0.526788	0.282253	0.133213	0.197992	0.348821	0.527095	0.607839	0.587151	0.484366
-0.177322	0.0484163	0.265039	0.489542	0.62377	0.682486	0.671086	0.558266	0.373913	0.149305	-0.0642697	-0.197244	-0.208352	-0.0964912	0.133819	0.414962	0.701731	0.959122	1.118	1.11508	0.970692	0.729047	0.508554	0.285279	0.137393	0.0836736	0.0643927	0.0454071	-0.019262	-0.0534859	-0.0394928	-0.0197109	-0.0715448	-0.13433	-0.173274	-0.158895	-0.0639001	0.130768	0.301363	0.431999	0.464153	0.30823	0.0464446	-0.229866	-0.371157	-0.382029	-0.249348	-0.0969091	0.0201248	0.101979
-0.542306	-0.713554	-0.915804	-1.13366	-1.25424	-1.30446	-1.26279	-1.20276	-1.08864	-0.934184	-0.704025	-0.476766	-0.289839	-0.189508	-0.228689	-0.277423	-0.345583	-0.447478	-0.548764	-0.622081	-0.688125	-0.727438	-0.777858	-0.81685	-0.818581	-0.837966	-0.820642	-0.80232	-0.783706	-0.757045	-0.674897	-0.502111	-0.258394	-0.0201835	0.180295	0.267752	0.21227	0.0972464	-0.0938935	-0.199792	-0.176844	-0.0403512	0.116428	0.295252	0.444923	0.600249	0.743472	0.80097	0.720898	0.446681
-0.415942	-0.211814	0.0793707	0.436263	0.79683	1.04273	1.16725	1.13156	0.979474	0.829453	0.737618	0.759728	0.849433	0.867202	0.77242	0.577752	0.403714	0.376853	0.486334	0.589345	0.55196	0.362948	0.0484397	-0.225763	-0.370473	-0.296261	-0.0622769	0.261105	0.537585	0.688109	0.750683	0.790204	0.937431	1.21817	1.56525	1.83681	1.99351	2.00432	1.92336	1.78401	1.6099	1.4096	1.18399	1.00162	0.919516	0.885558	0.889413	0.871396	0.832851	0.829467
-0.928778	-0.962767	-0.939241	-0.839589	-0.735472	-0.721409	-0.830525	-0.980012	-1.12981	-1.17022	-1.122	-0.994845	-0.799805	-0.596566	-0.389627	-0.278242	-0.255028	-0.301173	-0.360922	-0.359529	-0.317565	-0.296234	-0.272288	-0.226108	-0.15435	-0.00785188	0.149496	0.296402	0.385707	0.397494	0.404762	0.42765	0.398763	0.297472	0.145696	-0.0145646	-0.0924471	-0.0361863	0.129895	0.342543	0.498699	0.513837	0.40514	0.258957	0.146855	0.105058	0.124362	0.169098	0.152344	0.063734
1.23606	1.11175	0.974632	0.762257	0.46666	0.167132	-0.0810913	-0.199851	-0.24297	-0.223101	-0.186865	-0.0871871	0.0361673	0.0910287	-0.00769627	-0.248553	-0.459368	-0.671644	-0.785383	-0.755067	-0.690269	-0.673213	-0.72083	-0.749453	-0.700509	-0.555902	-0.481005	-0.434733	-0.475769	-0.497296	-0.394777	-0.202459	0.0858211	0.345735	0.541552	0.58726	0.531246	0.391465	0.250305	0.141058	0.0254932	-0.0287154	0.0254784	0.225723	0.549879	0.843943	0.955638	0.86966	0.659763	0.444928
-0.61769	-0.363432	-0.079013	0.20776	0.407927	0.433539	0.334506	0.0866646	-0.154565	-0.352903	-0.487073	-0.580547	-0.653775	-0.672853	-0.623732	-0.50228	-0.357633	-0.266129	-0.296423	-0.412265	-0.478038	-0.466255	-0.435486	-0.4437	-0.55663	-0.732887	-0.851805	-0.851822	-0.734888	-0.555981	-0.343684	-0.125169	0.0852423	0.19862	0.277968	0.333522	0.386441	0.45221	0.492094	0.488537	0.511668	0.529304	0.626664	0.69748	0.708632	0.630607	0.514995	0.406085	0.327841	0.229037
1.15277	1.06708	0.917757	0.7469	0.627729	0.62469	0.763365	0.959658	1.10497	1.19832	1.17737	1.08506	1.02123	0.992627	1.03748	1.1565	1.25173	1.27724	1.16372	0.956726	0.772637	0.709813	0.774746	0.95026	1.13419	1.29768	1.44185	1.54802	1.57816	1.5623	1.5102	1.50335	1.48488	1.45331	1.42217	1.34381	1.21889	1.03915	0.867219	0.791863	0.767418	0.773821	0.770315	0.768045	0.76297	0.741094	0.69077	0.590373	0.44155	0.305872
-0.354724	-0.255704	-0.151463	-0.0228485	0.117042	0.185646	0.165496	0.0654991	-0.104097	-0.246678	-0.31976	-0.327718	-0.279115	-0.21169	-0.16578	-0.125509	-0.0499409	0.00289714	0.0603226	0.0991989	0.166551	0.254823	0.378476	0.433356	0.37881	0.266446	0.150338	0.136272	0.254262	0.385606	0.501102	0.555744	0.629692	0.714848	0.779479	0.751641	0.667475	0.519373	0.363648	0.295744	0.342245	0.500415	0.695061	0.837935	0.78707	0.522115	0.154714	-0.109159	-0.205052	-0.119706
0.921865	0.974774	0.998414	0.955272	0.869854	0.747006	0.603545	0.478183	0.325647	0.135194	-0.0750612	-0.30859	-0.436266	-0.477393	-0.506698	-0.577546	-0.700588	-0.793909	-0.843641	-0.809415	-0.71561	-0.624128	-0.538799	-0.55566	-0.637367	-0.775552	-0.803354	-0.735835	-0.564262	-0.446981	-0.421865	-0.390472	-0.320899	-0.160182	0.0723617	0.349198	0.594698	0.774262	0.936078	1.02575	1.01829	0.880591	0.735783	0.68461	0.712905	0.811281	0.885281	0.833251	0.695107	0.54877
-0.279176	-0.0981118	0.0360193	0.0925737	0.120429	0.146468	0.23814	0.376577	0.497237	0.483906	0.341388	0.176262	0.0232027	-0.114674	-0.267282	-0.510089	-0.707378	-0.845231	-0.874668	-0.828294	-0.828852	-0.801617	-0.725522	-0.666481	-0.55018	-0.38483	-0.23402	-0.129542	-0.084818	-0.0603684	0.00252076	0.113229	0.224725	0.326103	0.413639	0.51297	0.70797	0.967037	1.22277	1.35685	1.24071	0.991073	0.691203	0.479474	0.402252	0.456712	0.600533	0.815214	1.03867	1.22634
0.0419266	-0.172215	-0.419664	-0.626494	-0.741036	-0.732486	-0.589306	-0.399777	-0.265965	-0.213897	-0.256743	-0.338697	-0.382598	-0.408391	-0.4264	-0.474296	-0.499108	-0.453073	-0.319742	-0.175044	-0.0691121	0.0098577	-0.0230113	-0.189364	-0.461782	-0.716471	-0.842315	-0.715654	-0.36972	0.128294	0.56589	0.887472	1.05163	1.06517	1.0341	1.02031	0.963448	0.848596	0.637822	0.346	0.087973	-0.0836796	-0.206733	-0.390964	-0.594227	-0.747383	-0.821837	-0.758066	-0.657885	-0.550348
-0.808291	-0.624795	-0.408714	-0.245333	-0.114465	-0.0363741	0.00922001	-0.0201508	-0.0909232	-0.206872	-0.340728	-0.467643	-0.549573	-0.52893	-0.428685	-0.157002	0.210478	0.603426	0.876578	1.01272	1.03302	1.05246	1.09132	1.16219	1.2309	1.22909	1.15166	0.993619	0.82389	0.654259	0.505554	0.40053	0.365926	0.417025	0.522356	0.670116	0.814748	0.992721	1.20122	1.32978	1.23422	0.936619	0.57825	0.261421	0.0635229	-0.0175486	-0.0757029	-0.135399	-0.28265	-0.430761
-0.119677	-0.0873882	0.0247449	0.17931	0.34291	0.473967	0.547211	0.535947	0.47282	0.361844	0.204418	0.0576161	-0.0810645	-0.144714	-0.237979	-0.328626	-0.408878	-0.439824	-0.342582	-0.0943305	0.256869	0.611337	0.759815	0.692707	0.48653	0.280393	0.158801	0.137223	0.21678	0.347888	0.517796	0.681427	0.831933	0.893133	0.876571	0.838871	0.803795	0.75132	0.608586	0.44965	0.272904	0.162662	0.220877	0.39138	0.62627	0.752853	0.723117	0.593803	0.477667	0.359788
0.527369	0.658688	0.646589	0.50359	0.205667	-0.207688	-0.543752	-0.778917	-0.841489	-0.818084	-0.731855	-0.565017	-0.354965	-0.152319	0.00675116	0.0636461	0.10401	0.0920688	0.0284187	-0.0895832	-0.240405	-0.298356	-0.195715	0.0392486	0.325793	0.475201	0.406507	0.206021	-0.0365198	-0.223584	-0.24127	-0.110388	0.131335	0.383643	0.555891	0.607273	0.543265	0.367629	0.192201	0.089628	0.151774	0.230507	0.330103	0.378892	0.320233	0.171862	-0.0236418	-0.165134	-0.175093	-0.0678262
0.071791	0.165609	0.179422	0.139597	0.103997	0.141259	0.33315	0.54965	0.651964	0.551528	0.325216	0.0126777	-0.192214	-0.264768	-0.249556	-0.233202	-0.299719	-0.425938	-0.564627	-0.597268	-0.533678	-0.4646	-0.48999	-0.570391	-0.651742	-0.691572	-0.691966	-0.721292	-0.736709	-0.714275	-0.626164	-0.494958	-0.335358	-0.237047	-0.200297	-0.225596	-0.260749	-0.246971	-0.196625	-0.123426	-0.0424504	0.00965638	0.0494059	0.0736649	0.030629	-0.097706	-0.252918	-0.397226	-0.4787	-0.486906
-0.474013	-0.321541	-0.154884	0.0723938	0.22201	0.314433	0.316424	0.253171	0.156031	6.54381e-05	-0.165577	-0.344544	-0.579233	-0.794959	-0.981972	-1.17176	-1.27408	-1.31613	-1.18642	-0.997458	-0.764737	-0.522133	-0.271145	-0.0526238	0.126233	0.240575	0.336595	0.501115	0.773284	1.12435	1.36483	1.39016	1.22368	0.998316	0.813231	0.669557	0.600802	0.582087	0.604828	0.637397	0.637728	0.539626	0.395515	0.296485	0.309972	0.35592	0.399379	0.345535	0.215938	0.0977799
-0.389914	-0.378055	-0.380351	-0.442294	-0.565767	-0.677957	-0.76178	-0.748573	-0.612824	-0.463351	-0.356197	-0.304603	-0.278398	-0.315141	-0.319467	-0.289681	-0.211947	-0.0876187	0.0144446	0.074104	0.114322	0.110367	0.128425	0.152597	0.165423	0.187747	0.222687	0.361519	0.630863	0.941604	1.11584	1.13887	0.993178	0.774325	0.631177	0.634713	0.789158	0.938819	0.933163	0.727314	0.368416	0.00282367	-0.186995	-0.190049	-0.0894695	0.030483	0.105092	0.158228	0.133428	0.0989074
0.0683954	0.177381	0.204158	0.178128	0.0316317	-0.213494	-0.418715	-0.543695	-0.48334	-0.301908	-0.081232	0.062428	0.0379371	-0.140534	-0.354706	-0.472547	-0.500515	-0.36681	-0.0651526	0.333016	0.718047	1.05769	1.30138	1.39531	1.37292	1.28191	1.19772	1.18364	1.2391	1.28026	1.28815	1.21445	1.1605	1.16297	1.16669	1.10295	0.967033	0.791435	0.653657	0.596064	0.591137	0.676073	0.784234	0.8414	0.841515	0.830939	0.821976	0.883691	0.956212	0.978559
-0.622166	-0.626384	-0.609632	-0.568841	-0.521833	-0.482179	-0.509242	-0.548805	-0.650052	-0.718465	-0.758545	-0.73994	-0.717242	-0.731267	-0.794054	-0.934534	-1.0838	-1.24213	-1.33186	-1.28275	-1.18723	-1.05733	-0.906603	-0.77593	-0.681566	-0.589333	-0.53451	-0.490082	-0.408272	-0.286526	-0.146991	0.00992492	0.115091	0.145805	0.106344	0.0426048	0.00460199	-0.00469841	0.00189017	-0.0396166	-0.184949	-0.345124	-0.397884	-0.354395	-0.159913	0.0734661	0.282196	0.477058	0.555433	0.604134
1.84809	2.11089	2.22835	2.25284	2.08397	1.87327	1.73979	1.72174	1.79385	1.83541	1.75885	1.47178	1.1127	0.7481	0.460835	0.302337	0.320453	0.521383	0.840571	1.15621	1.35561	1.4387	1.42977	1.4319	1.52885	1.69764	1.8948	1.88811	1.62837	1.22842	0.806741	0.609497	0.609266	0.783433	0.94102	1.05942	1.11304	1.14843	1.21627	1.25001	1.26845	1.25688	1.19692	1.09381	1.01517	0.975946	0.997212	1.08962	1.18646	1.19541
-1.54758	-1.35744	-1.17478	-0.946279	-0.781182	-0.635633	-0.470344	-0.277198	-0.0250501	0.195772	0.352679	0.443742	0.437987	0.4176	0.494038	0.588556	0.665236	0.660609	0.545496	0.36638	0.243503	0.233742	0.239493	0.172462	-0.0205048	-0.228337	-0.382313	-0.415397	-0.354381	-0.192227	-0.012441	0.238243	0.509077	0.760007	0.898297	0.874747	0.681055	0.448398	0.255371	0.144053	0.115556	0.155042	0.223348	0.26357	0.247913	0.204871	0.183602	0.203467	0.260296	0.314802
-0.593025	-0.619461	-0.582435	-0.425356	-0.171588	0.121263	0.288063	0.335066	0.334118	0.389066	0.601492	0.999007	1.43903	1.74656	1.76718	1.54504	1.14795	0.764881	0.48227	0.30176	0.247138	0.274858	0.429911	0.562134	0.622814	0.497166	0.271586	0.030617	-0.112509	-0.17372	-0.174142	-0.197997	-0.269301	-0.346154	-0.343039	-0.209742	0.0178648	0.242801	0.399643	0.528944	0.643748	0.779761	0.777326	0.634223	0.389438	0.111728	-0.0953419	-0.162753	-0.117376	-0.0882806
-0.0360307	0.112917	0.265699	0.293348	0.250717	0.127259	0.0128591	-0.000352538	0.0281007	0.197146	0.377228	0.540994	0.634208	0.687395	0.708359	0.70498	0.722207	0.773475	0.868898	0.995656	1.08106	1.07283	0.94114	0.789511	0.685754	0.626778	0.5696	0.440633	0.281861	0.141757	0.0872487	0.152462	0.270264	0.40191	0.434008	0.346434	0.0923497	-0.20828	-0.406866	-0.481627	-0.445431	-0.391529	-0.329996	-0.27611	-0.268809	-0.214235	-0.0738579	0.0437556	0.0758255	0.0250771
0.450759	0.379976	0.280375	0.150583	0.0559287	-0.0497888	-0.12349	-0.230733	-0.316247	-0.367636	-0.350722	-0.274235	-0.108458	0.103461	0.27598	0.376393	0.448985	0.540966	0.61809	0.671049	0.6992	0.693967	0.629635	0.525893	0.396795	0.316265	0.362333	0.523417	0.692237	0.793686	0.846775	0.83061	0.77556	0.682015	0.568007	0.511601	0.527129	0.595408	0.712269	0.809284	0.844204	0.867484	0.798522	0.733488	0.608926	0.445391	0.216515	-0.153364	-0.625512	-1.05173
0.107724	-0.0332705	-0.184029	-0.348624	-0.438566	-0.487913	-0.50779	-0.532162	-0.588463	-0.589246	-0.527297	-0.449716	-0.329531	-0.163876	0.00966098	0.117096	0.0790958	-0.0632496	-0.240915	-0.328728	-0.343438	-0.324512	-0.399	-0.551363	-0.725602	-0.862489	-0.879879	-0.803761	-0.676352	-0.525638	-0.384023	-0.233214	-0.0691629	0.0164104	0.00104105	-0.106621	-0.237783	-0.347297	-0.337087	-0.26417	-0.207586	-0.168873	-0.174479	-0.152056	-0.128001	-0.0501169	0.0331877	0.129141	0.242406	0.300051
-1.17965	-1.00137	-0.808782	-0.598247	-0.44062	-0.414083	-0.512018	-0.671841	-0.736591	-0.651751	-0.441939	-0.245904	-0.110975	-0.0990822	-0.131362	-0.178715	-0.167987	-0.111829	0.0129649	0.156821	0.217358	0.18249	0.0739555	-0.0731557	-0.253991	-0.332622	-0.302994	-0.204924	-0.0764119	0.019198	0.048268	-0.0158025	-0.0934813	-0.15337	-0.151587	-0.139015	-0.181402	-0.252491	-0.299952	-0.235424	-0.0593691	0.176915	0.378213	0.479045	0.451595	0.344558	0.200963	0.0534508	-0.0658275	-0.0909801
-0.819475	-0.970351	-1.07218	-1.05182	-0.965318	-0.88672	-0.839505	-0.755592	-0.61132	-0.457431	-0.329763	-0.251456	-0.248055	-0.374681	-0.542126	-0.748104	-0.839125	-0.824039	-0.68596	-0.506678	-0.319277	-0.191943	-0.189185	-0.310112	-0.533162	-0.729859	-0.838894	-0.754682	-0.58682	-0.376584	-0.234077	-0.236866	-0.341169	-0.520977	-0.733122	-0.995844	-1.25166	-1.45365	-1.48498	-1.36854	-1.17048	-1.0394	-0.97476	-0.987154	-1.09161	-1.22181	-1.32338	-1.39978	-1.42748	-1.37757
-0.537478	-0.541011	-0.467566	-0.255006	-0.00598777	0.218073	0.295467	0.209416	0.0516414	-0.0187533	0.0473301	0.235566	0.446611	0.61434	0.645509	0.639423	0.624891	0.673866	0.717242	0.766835	0.77095	0.75078	0.68761	0.547597	0.337297	0.100382	-0.126501	-0.303762	-0.458694	-0.589711	-0.645631	-0.542697	-0.273876	0.0282902	0.291282	0.522316	0.675402	0.747806	0.748143	0.63571	0.38143	0.0369201	-0.343868	-0.745736	-1.1016	-1.38239	-1.52255	-1.48103	-1.3212	-1.16225
0.130691	-0.00460913	-0.213349	-0.451211	-0.631105	-0.671037	-0.52508	-0.269101	-0.00506224	0.288707	0.614273	0.978085	1.33204	1.58709	1.63994	1.53012	1.34582	1.11475	0.889351	0.647384	0.397464	0.132964	-0.0769235	-0.170468	-0.178471	-0.133022	-0.0878662	-0.081982	-0.071072	-0.0424473	0.0793413	0.190905	0.229439	0.195226	0.165816	0.178102	0.271392	0.439632	0.667782	0.955692	1.19268	1.32482	1.30325	1.20687	1.16469	1.2413	1.42427	1.63412	1.79247	1.78186
-0.410324	-0.365972	-0.324727	-0.336253	-0.365163	-0.426077	-0.479102	-0.503621	-0.543284	-0.589905	-0.614126	-0.590919	-0.456298	-0.235979	0.0472397	0.366386	0.543122	0.586855	0.547619	0.51689	0.539393	0.590505	0.588651	0.498487	0.332341	0.165217	0.0920206	0.0976836	0.173426	0.326001	0.472912	0.577367	0.629816	0.616484	0.581033	0.613449	0.850408	1.30665	1.91384	2.40267	2.71498	2.7592	2.6233	2.36873	2.06283	1.73344	1.42075	1.1264	0.881875	0.735544
-0.0423322	-0.0261132	-0.0428817	-0.122084	-0.315932	-0.548856	-0.745825	-0.854057	-0.902839	-0.925344	-0.865478	-0.745963	-0.600835	-0.487667	-0.458802	-0.582849	-0.732789	-0.816248	-0.767069	-0.638648	-0.560716	-0.576498	-0.718139	-0.934802	-1.14956	-1.31294	-1.42203	-1.45815	-1.46824	-1.43607	-1.41407	-1.36299	-1.24745	-1.08072	-0.89505	-0.673579	-0.508146	-0.361003	-0.310246	-0.36431	-0.494484	-0.705692	-0.940405	-1.14147	-1.23502	-1.16056	-0.96544	-0.766611	-0.632043	-0.607594
0.675651	0.774953	0.874356	0.951271	0.994621	1.04195	1.06559	1.1003	1.1214	1.16109	1.18584	1.1776	1.14065	1.11568	1.07119	0.976815	0.770902	0.493114	0.197901	-0.0398432	-0.127048	-0.0896494	-0.00245588	0.0908197	0.136878	0.138574	0.101382	0.0480049	-0.0145008	-0.137289	-0.317949	-0.484108	-0.611514	-0.645669	-0.600278	-0.502362	-0.406091	-0.314065	-0.157348	0.0266394	0.237434	0.360881	0.391597	0.218118	-0.157103	-0.666598	-1.16029	-1.47897	-1.59726	-1.56707
0.362435	0.359435	0.27118	0.116631	-0.0620224	-0.179262	-0.185618	-0.101566	0.00432859	0.0686753	0.16501	0.292857	0.471467	0.670402	0.908828	1.06151	1.12636	1.10194	0.932661	0.642161	0.284306	-0.02866	-0.213263	-0.220752	-0.0596665	0.170203	0.308539	0.336875	0.252526	0.154319	0.15826	0.278687	0.457771	0.592886	0.615837	0.557999	0.411953	0.232342	-0.0518064	-0.399864	-0.773402	-1.10329	-1.3822	-1.5662	-1.63345	-1.55806	-1.35384	-1.12354	-0.924572	-0.856944
0.31501	0.330567	0.294678	0.222876	0.126939	0.0622767	0.014419	-0.075982	-0.215631	-0.378217	-0.468272	-0.49018	-0.450565	-0.37374	-0.260972	-0.123447	-0.0349076	-0.00654678	0.0178954	0.0986416	0.294434	0.502777	0.67782	0.757332	0.725481	0.642158	0.508279	0.395692	0.316315	0.316529	0.429289	0.622914	0.780689	0.883176	0.939055	0.924938	0.910528	0.798144	0.558455	0.191612	-0.183131	-0.508648	-0.700154	-0.779652	-0.776767	-0.744552	-0.72962	-0.723613	-0.732016	-0.752937
0.218178	0.190834	0.157439	0.162788	0.17253	0.205438	0.299093	0.467684	0.632905	0.851899	1.12617	1.35093	1.53833	1.5736	1.42283	1.02746	0.394548	-0.456783	-1.34286	-2.16261	-2.7576	-3.17701	-3.48002	-3.67802	-3.77965	-3.6934	-3.44082	-3.139	-2.90094	-2.75644	-2.69919	-2.67089	-2.65619	-2.62029	-2.5658	-2.56623	-2.60034	-2.73496	-2.90215	-3.0749	-3.2197	-3.3973	-3.61525	-3.83019	-4.07713	-4.28206	-4.40898	-4.40108	-4.2824	-4.05628
-0.0439231	-0.0203161	0.0621618	0.142292	0.205607	0.209298	0.160707	0.0575499	-0.0543328	-0.112116	-0.0679394	0.0264488	0.101551	0.147916	0.166964	0.221386	0.302329	0.383655	0.413726	0.370933	0.270717	0.179534	0.101618	0.0352942	-0.0362956	-0.092891	-0.0522982	0.0799105	0.293193	0.55103	0.761777	0.871084	0.929865	0.914058	0.85623	0.753633	0.66412	0.580237	0.490096	0.331141	0.0978625	-0.203648	-0.509553	-0.705384	-0.781984	-0.778041	-0.780584	-0.799961	-0.798275	-0.746631
1.05916	1.11978	1.09129	0.999793	0.826154	0.611603	0.485163	0.432352	0.462537	0.491352	0.483975	0.455262	0.42628	0.399638	0.378119	0.362093	0.382223	0.468959	0.599331	0.738421	0.861989	0.968994	1.09321	1.18249	1.21412	1.24013	1.2302	1.19012	1.1178	1.0367	0.946101	0.858727	0.81995	0.903785	1.04903	1.21882	1.37964	1.54316	1.68847	1.72507	1.62524	1.38171	1.08642	0.82569	0.69437	0.721894	0.841957	0.926101	0.938683	0.870717
0.813627	0.599993	0.4696	0.467617	0.602856	0.840297	1.10766	1.36865	1.59437	1.79435	1.89154	1.9213	1.86164	1.81856	1.80259	1.81761	1.84643	1.93011	2.05967	2.23516	2.34286	2.31327	2.15179	1.9566	1.80491	1.74285	1.72404	1.72978	1.76092	1.822	1.80899	1.80332	1.86118	1.97538	2.10365	2.22858	2.28076	2.32063	2.35293	2.36131	2.33803	2.16237	1.93746	1.74715	1.65595	1.57584	1.48329	1.35612	1.16652	0.995545
-0.957465	-1.14129	-1.3329	-1.4973	-1.54208	-1.48853	-1.36974	-1.20951	-1.0738	-0.954513	-0.8406	-0.763505	-0.682431	-0.614545	-0.467809	-0.289431	-0.0832965	0.114084	0.262285	0.35637	0.418179	0.504576	0.644701	0.817413	0.953289	1.04077	1.06994	0.982444	0.879834	0.81479	0.758031	0.718276	0.681174	0.670077	0.719662	0.776445	0.89169	0.998034	1.07429	1.00457	0.781868	0.402495	-0.137106	-0.715839	-1.15845	-1.35395	-1.31386	-1.07186	-0.782228	-0.549239
0.479686	0.199965	-0.0225262	-0.128667	-0.0924252	0.0506819	0.0914119	-0.124653	-0.495572	-0.850526	-1.02859	-0.936783	-0.68058	-0.445797	-0.342218	-0.410208	-0.600926	-0.750397	-0.815167	-0.705203	-0.401313	-0.0401874	0.230498	0.238338	0.0295354	-0.241747	-0.357484	-0.213863	0.0989721	0.401912	0.515701	0.380895	0.0733887	-0.313875	-0.590741	-0.697015	-0.645313	-0.450865	-0.291941	-0.20973	-0.284202	-0.468251	-0.731685	-0.912247	-0.946077	-0.805785	-0.628772	-0.524543	-0.463271	-0.434048
0.41304	0.478232	0.51264	0.512058	0.49127	0.482497	0.491058	0.521766	0.610819	0.740778	0.966372	1.12102	1.18858	1.11867	0.974953	0.784391	0.599594	0.414578	0.230579	0.0714388	-0.0156628	0.0226537	0.137891	0.32646	0.47443	0.480565	0.388469	0.268986	0.257175	0.328793	0.465331	0.633438	0.722334	0.662443	0.541947	0.443131	0.43661	0.499877	0.530994	0.471369	0.251443	-0.0322511	-0.241249	-0.301108	-0.275883	-0.237044	-0.198739	-0.199991	-0.239102	-0.286304
-0.470861	-0.394088	-0.305968	-0.202431	-0.126561	-0.0679587	0.0107779	0.142363	0.30933	0.503317	0.661559	0.80703	1.00498	1.26382	1.56931	1.76355	1.84106	1.85152	1.83946	1.84458	1.799	1.69048	1.48306	1.30383	1.18853	1.19931	1.31588	1.44179	1.47516	1.35146	1.16244	0.968624	0.89975	0.970035	1.15494	1.3473	1.49846	1.55119	1.54936	1.52466	1.50869	1.45027	1.33265	1.12256	0.893557	0.702969	0.614551	0.626735	0.676824	0.724686
-0.350041	-0.432724	-0.419637	-0.28977	-0.0697064	0.162382	0.269713	0.262896	0.12136	-0.0884878	-0.295642	-0.501956	-0.644208	-0.70298	-0.678574	-0.556625	-0.33343	-0.0410437	0.299704	0.658244	0.965076	1.22207	1.32991	1.35028	1.30414	1.23994	1.22459	1.2732	1.34471	1.35277	1.40005	1.44358	1.54927	1.6963	1.87517	2.03274	2.16116	2.09582	1.85501	1.45353	0.91746	0.441125	0.10514	-0.0889182	-0.143117	-0.166743	-0.229424	-0.364195	-0.514225	-0.608837
-0.998854	-1.02733	-1.03874	-1.01017	-1.00401	-0.974472	-0.927623	-0.83013	-0.655946	-0.468028	-0.3295	-0.292809	-0.438588	-0.616577	-0.754772	-0.800234	-0.792414	-0.773311	-0.832635	-0.959981	-1.06119	-1.07773	-1.01591	-0.879371	-0.717332	-0.587877	-0.52065	-0.43909	-0.341056	-0.217806	-0.0729259	0.0842083	0.200358	0.258707	0.239512	0.208573	0.218699	0.263351	0.362078	0.448308	0.45082	0.335019	0.0953763	-0.171326	-0.427047	-0.621923	-0.776627	-0.851423	-0.877751	-0.822719
0.407876	0.288175	0.136976	-0.0142967	-0.180341	-0.310668	-0.411789	-0.456891	-0.48041	-0.502685	-0.57125	-0.655825	-0.78525	-0.883166	-0.916993	-0.887674	-0.807464	-0.73715	-0.696941	-0.706143	-0.739339	-0.748795	-0.698878	-0.587582	-0.389715	-0.115932	0.186939	0.421377	0.54793	0.587017	0.564489	0.542204	0.491331	0.431104	0.357739	0.328314	0.309304	0.306386	0.222832	0.0231818	-0.319929	-0.733169	-1.10358	-1.35749	-1.48292	-1.5122	-1.48493	-1.46133	-1.41933	-1.34092
-0.622854	-0.613459	-0.560725	-0.520314	-0.525728	-0.537697	-0.594674	-0.626627	-0.598597	-0.521259	-0.415077	-0.244367	0.0101425	0.361386	0.686794	0.877845	0.897305	0.775922	0.60428	0.503487	0.569267	0.773846	1.039	1.32341	1.55822	1.77315	1.90249	1.9723	1.93448	1.77471	1.56099	1.31393	1.1371	1.05885	1.20171	1.56788	2.10704	2.66964	3.10097	3.29369	3.28254	3.14025	2.96233	2.77091	2.60438	2.42861	2.21999	1.98626	1.7571	1.50205
-0.656147	-0.715162	-0.737582	-0.694493	-0.594439	-0.428847	-0.243566	-0.0756724	0.00370448	0.0691828	0.149192	0.265624	0.344758	0.329588	0.274147	0.22462	0.311839	0.553489	0.93914	1.30631	1.50351	1.50863	1.34781	1.0907	0.837662	0.673204	0.635573	0.668509	0.679975	0.621889	0.500368	0.405449	0.33956	0.369885	0.502258	0.685594	0.848034	0.990612	1.12047	1.20239	1.23786	1.22021	1.14393	0.974157	0.689827	0.434787	0.258225	0.147117	0.138558	0.215622
-0.187052	0.210098	0.556742	0.778719	0.835598	0.74214	0.695955	0.715734	0.801808	0.816228	0.820959	0.831303	0.888704	0.944726	0.92476	0.80332	0.620054	0.516878	0.537539	0.649037	0.694256	0.583393	0.30382	-0.00308818	-0.267941	-0.41981	-0.476043	-0.505515	-0.526812	-0.531657	-0.499686	-0.487033	-0.508189	-0.540268	-0.526012	-0.45941	-0.389283	-0.39637	-0.475848	-0.60615	-0.748604	-0.896399	-1.10838	-1.38361	-1.65286	-1.86892	-1.99076	-2.08211	-2.19853	-2.33648
0.366215	0.555816	0.673836	0.667662	0.543411	0.34118	0.143658	-0.00462894	-0.0607311	-0.0498676	-0.00527891	0.0637539	0.159271	0.238891	0.278999	0.245704	0.149631	0.0377542	-0.0163979	0.0131879	0.179434	0.421761	0.668658	0.876141	0.992644	1.01081	0.913238	0.765183	0.650658	0.560477	0.482526	0.409333	0.33604	0.30856	0.323519	0.378721	0.443633	0.48113	0.458307	0.337168	0.14653	-0.13078	-0.42408	-0.683801	-0.833512	-0.875316	-0.764667	-0.565303	-0.320021	-0.0984369
-1.28102	-1.25816	-1.17904	-1.08558	-1.01137	-1.0093	-1.09625	-1.24019	-1.46653	-1.67403	-1.79852	-1.90201	-1.9866	-2.01052	-1.9762	-1.83953	-1.58373	-1.27452	-0.934396	-0.620004	-0.389374	-0.225171	-0.120097	-0.062394	-0.0364823	-0.13699	-0.341198	-0.627338	-0.882653	-1.0115	-0.994872	-0.880477	-0.71598	-0.539764	-0.343837	-0.17355	-0.0566329	0.0355878	0.103644	0.0608585	-0.105473	-0.447514	-0.879155	-1.33986	-1.73608	-1.97869	-2.05589	-2.03463	-1.93275	-1.84672
-0.272152	-0.259878	-0.169984	-0.0437503	0.0929843	0.258405	0.385292	0.484501	0.595116	0.701165	0.752152	0.730826	0.590248	0.385895	0.174087	-0.0256446	-0.12576	-0.1522	-0.137622	-0.0944037	-0.0183649	0.0969362	0.229236	0.332671	0.336572	0.343288	0.315459	0.328456	0.314358	0.296635	0.260088	0.25249	0.342427	0.53623	0.768282	0.863341	0.853429	0.722907	0.543727	0.265814	-0.166153	-0.726715	-1.36405	-1.93702	-2.40848	-2.71446	-2.84303	-2.8571	-2.77586	-2.63107
0.313907	0.362584	0.415304	0.438594	0.41993	0.350793	0.292204	0.2642	0.257923	0.265927	0.243856	0.209298	0.159146	0.119435	0.0840001	0.108711	0.21369	0.394434	0.644442	0.883797	1.03217	1.06814	0.973582	0.764018	0.497993	0.262538	0.0902067	-0.0138291	-0.0814161	-0.125997	-0.15114	-0.087293	0.0846759	0.235918	0.335831	0.370467	0.281251	0.0688851	-0.292622	-0.733241	-1.20617	-1.59973	-1.87065	-1.89947	-1.75073	-1.47307	-1.17507	-0.834048	-0.454795	-0.108929
0.143125	0.111449	0.176519	0.247178	0.347045	0.38338	0.349523	0.271678	0.161113	0.0588763	-0.0412592	-0.134909	-0.313716	-0.568209	-0.860327	-1.13665	-1.31295	-1.33115	-1.18642	-0.950195	-0.686623	-0.48636	-0.341139	-0.258664	-0.231201	-0.243583	-0.319222	-0.414521	-0.450538	-0.393133	-0.246025	-0.0267131	0.185563	0.337568	0.388233	0.29144	0.0650194	-0.288878	-0.643811	-0.888333	-0.943567	-0.82948	-0.56672	-0.28228	-0.0615404	0.0177741	-0.0937625	-0.291026	-0.436863	-0.512188
0.143125	0.111449	0.176519	0.247178	0.347045	0.38338	0.349523	0.271678	0.161113	0.0588763	-0.0412592	-0.134909	-0.313716	-0.568209	-0.860327	-1.13665	-1.31295	-1.33115	-1.18642	-0.950195	-0.686623	-0.48636	-0.341139	-0.258664	-0.231201	-0.243583	-0.319222	-0.414521	-0.450538	-0.393133	-0.246025	-0.0267131	0.185563	0.337568	0.388233	0.29144	0.0650194	-0.288878	-0.643811	-0.888333	-0.943567	-0.82948	-0.56672	-0.28228	-0.0615404	0.0177741	-0.0937625	-0.291026	-0.436863	-0.512188
-0.664861	-0.74103	-0.786256	-0.780453	-0.760573	-0.735447	-0.752354	-0.845552	-0.926132	-0.932008	-0.875974	-0.72607	-0.582694	-0.555221	-0.607567	-0.694709	-0.703749	-0.626068	-0.478911	-0.382055	-0.328055	-0.347356	-0.395609	-0.415341	-0.512613	-0.593133	-0.698787	-0.775335	-0.828842	-0.790188	-0.77449	-0.790311	-0.834702	-0.930183	-0.998151	-0.963474	-0.874416	-0.726734	-0.62087	-0.516968	-0.402982	-0.337502	-0.297213	-0.33968	-0.398872	-0.433599	-0.392686	-0.233843	0.0693248	0.381288
1.40848	1.3812	1.3005	1.18142	0.988556	0.735205	0.499126	0.344724	0.26819	0.189293	0.121627	0.100076	0.0542823	-0.0301623	-0.162988	-0.287701	-0.378532	-0.401741	-0.405251	-0.387294	-0.407075	-0.465132	-0.486548	-0.4088	-0.259361	-0.166783	-0.123027	-0.188069	-0.274478	-0.364325	-0.37089	-0.404722	-0.470834	-0.525919	-0.567847	-0.514977	-0.457638	-0.349447	-0.218124	-0.0752733	0.0253518	0.101676	0.0649513	-0.0398737	-0.185489	-0.221091	-0.123257	0.0381446	0.0982304	0.0531221
0.35347	0.287529	0.12331	-0.113994	-0.423703	-0.645548	-0.674527	-0.477345	-0.190272	0.111621	0.296728	0.343932	0.228143	-0.025685	-0.329901	-0.669217	-0.900675	-0.986171	-0.879444	-0.702525	-0.575767	-0.588792	-0.681776	-0.819078	-0.956393	-1.05204	-1.18436	-1.33211	-1.49648	-1.66795	-1.71768	-1.57949	-1.28785	-0.985509	-0.774217	-0.729535	-0.823624	-0.982615	-1.09974	-1.15692	-1.17722	-1.14275	-1.1079	-1.04827	-0.93085	-0.753214	-0.497636	-0.316183	-0.264739	-0.355502
-1.22595	-1.03353	-0.873173	-0.7203	-0.555091	-0.445303	-0.311378	-0.168809	-0.0020445	0.198758	0.365746	0.505178	0.581476	0.509419	0.307366	0.0423659	-0.224651	-0.435726	-0.602951	-0.730748	-0.868526	-1.00601	-1.15942	-1.32523	-1.43468	-1.45633	-1.40577	-1.29577	-1.20758	-1.16447	-1.18331	-1.27356	-1.27039	-1.1459	-0.89383	-0.600567	-0.360721	-0.235773	-0.271136	-0.456267	-0.696044	-0.950147	-1.1096	-1.09843	-0.975684	-0.832137	-0.792341	-0.797622	-0.769833	-0.657379
-0.252048	-0.188656	-0.112494	-0.0112162	0.114265	0.264025	0.416755	0.498076	0.476412	0.333811	0.144826	-0.0383564	-0.179628	-0.158996	-0.0616131	0.126237	0.286605	0.319781	0.274744	0.147198	-0.00524232	-0.137405	-0.216751	-0.25908	-0.212088	-0.111692	-0.0324698	-0.0166152	-0.0848471	-0.171493	-0.179603	-0.0416919	0.106243	0.170891	0.142246	0.0386514	-0.0275177	-0.0477591	0.0150527	0.0944687	0.152041	0.156972	0.157108	0.176282	0.236058	0.298877	0.306419	0.32233	0.368251	0.406068
-0.982779	-0.823363	-0.723802	-0.636082	-0.558646	-0.421674	-0.224952	0.132024	0.579975	0.972632	1.22386	1.24703	1.08139	0.83819	0.650394	0.521516	0.477927	0.485123	0.474248	0.449335	0.436553	0.450835	0.498932	0.557643	0.583561	0.68397	0.840358	1.0135	1.1368	1.11411	0.989127	0.819846	0.720903	0.610512	0.481068	0.275164	0.0452648	-0.129585	-0.296911	-0.369031	-0.367491	-0.261525	-0.10815	0.0420765	0.13885	0.111304	0.0835523	0.036073	0.0340782	0.0556254
0.34233	0.35164	0.401872	0.520464	0.65086	0.781479	0.85012	0.789274	0.561717	0.249053	-0.0379513	-0.15741	-0.0628414	0.198992	0.471263	0.621456	0.624246	0.495774	0.350246	0.223508	0.157071	0.137689	0.190774	0.329199	0.529228	0.762504	0.955077	1.06822	1.08836	0.968644	0.692798	0.290585	-0.10409	-0.411723	-0.54946	-0.554255	-0.484837	-0.334151	-0.113566	0.162338	0.443907	0.656295	0.742103	0.710609	0.597686	0.441976	0.254555	0.0609182	-0.0965484	-0.149177
0.624622	0.460911	0.376037	0.395366	0.439844	0.417791	0.326288	0.12208	-0.0523354	-0.12596	0.00102126	0.228597	0.431874	0.52926	0.526405	0.426878	0.333513	0.310951	0.299417	0.250404	0.173126	0.0352853	-0.0573731	-0.0653126	-0.111742	-0.198753	-0.328686	-0.408475	-0.360365	-0.203891	-0.0432828	0.0191121	-0.159121	-0.447849	-0.639451	-0.637644	-0.498034	-0.320228	-0.226378	-0.181131	-0.138587	-0.0807314	0.0114532	0.153111	0.314661	0.456664	0.433771	0.219335	-0.0960051	-0.419666
0.249154	0.372882	0.547616	0.715322	0.803166	0.780154	0.689443	0.576213	0.458523	0.378175	0.294312	0.27246	0.249277	0.240055	0.175148	0.0703108	-0.0567167	-0.175388	-0.291505	-0.420585	-0.455864	-0.407298	-0.324493	-0.324891	-0.408219	-0.533842	-0.65994	-0.764648	-0.868748	-0.942968	-0.965338	-0.93385	-0.866793	-0.802134	-0.822455	-0.85198	-0.875517	-0.822418	-0.6714	-0.480965	-0.333616	-0.354607	-0.454841	-0.595785	-0.628798	-0.614921	-0.537013	-0.475045	-0.444177	-0.448561
-0.376488	-0.361497	-0.353539	-0.2711	-0.116852	0.124839	0.342713	0.492966	0.51949	0.437045	0.344414	0.240355	0.213918	0.237443	0.302094	0.387228	0.477556	0.508711	0.48992	0.472593	0.430276	0.400911	0.332253	0.255596	0.145009	0.0283164	-0.0425833	-0.047715	-0.0189934	9.96389e-05	-0.0437431	-0.166234	-0.28313	-0.366253	-0.315342	-0.184121	0.0177335	0.211494	0.331347	0.35428	0.301987	0.165668	0.0214801	-0.136463	-0.260189	-0.304523	-0.326337	-0.26054	-0.117996	0.0784135
-0.118894	-0.150681	-0.138321	-0.1255	-0.0951355	-0.0650511	-0.0728664	-0.172192	-0.332734	-0.463409	-0.51272	-0.503203	-0.391139	-0.299795	-0.182884	-0.0920746	-0.0212256	0.0196299	0.096771	0.195237	0.259017	0.2358	0.0833308	-0.075639	-0.177562	-0.162764	-0.0472445	0.132247	0.221059	0.194582	0.024384	-0.207113	-0.407611	-0.46042	-0.401792	-0.288911	-0.220239	-0.209177	-0.215802	-0.225659	-0.212854	-0.206156	-0.191013	-0.223291	-0.276544	-0.376294	-0.38795	-0.318429	-0.182129	-0.00548078
-0.636167	-0.663581	-0.615125	-0.493159	-0.286153	-0.0562642	0.132298	0.237998	0.265877	0.208456	0.164763	0.0911461	-0.000203009	-0.10844	-0.168716	-0.174694	-0.186766	-0.198271	-0.192228	-0.150933	-0.111419	-0.0935051	-0.150156	-0.262577	-0.414139	-0.515621	-0.514024	-0.424274	-0.335106	-0.285494	-0.289219	-0.291541	-0.228288	-0.098234	0.0667227	0.185326	0.241648	0.217709	0.11411	-0.0222541	-0.156877	-0.226674	-0.270714	-0.250563	-0.158558	-0.0218704	0.113015	0.186339	0.162496	0.0991511
0.370379	0.481029	0.591384	0.677705	0.703637	0.67497	0.63781	0.635	0.710023	0.819877	0.904108	0.847464	0.651297	0.4583	0.385741	0.507082	0.79352	1.10368	1.35388	1.43868	1.36505	1.14223	0.84894	0.559828	0.309801	0.173751	0.146609	0.186162	0.254314	0.354468	0.406329	0.382208	0.2562	0.0924765	-0.0172711	-0.0410749	0.013939	0.160143	0.348371	0.503208	0.619188	0.689871	0.686482	0.603191	0.445461	0.215757	-0.00794729	-0.178806	-0.258246	-0.224526
0.704303	0.850163	0.982998	1.118	1.22836	1.34168	1.41153	1.40842	1.30228	1.23667	1.22448	1.253	1.27589	1.24599	1.16345	1.08556	1.07162	1.11146	1.12486	1.1007	1.00541	0.900226	0.773569	0.668409	0.580905	0.502389	0.447266	0.397212	0.401501	0.522063	0.625857	0.656544	0.569158	0.40119	0.22841	0.103929	0.0798362	0.0767516	0.0787621	-0.00691007	-0.164151	-0.330347	-0.47238	-0.5606	-0.569944	-0.553076	-0.572578	-0.613006	-0.643126	-0.606666
-1.16307	-1.06348	-0.98782	-0.966622	-0.935209	-0.781555	-0.413336	0.145733	0.738	1.20094	1.40802	1.3688	1.17476	0.920269	0.691813	0.528414	0.35563	0.251071	0.225256	0.346236	0.530443	0.698818	0.827178	0.900774	0.897955	0.83558	0.724858	0.559184	0.33385	0.115796	-0.00833488	-0.0140605	0.106887	0.271861	0.32532	0.221112	-0.0179891	-0.382845	-0.728428	-0.897955	-0.897775	-0.767082	-0.618863	-0.498366	-0.421021	-0.311981	-0.176231	-0.0279856	0.0701196	0.124982
0.0820575	0.223943	0.347395	0.41439	0.424575	0.360641	0.289986	0.251318	0.273352	0.273273	0.228704	0.0489072	-0.235972	-0.539401	-0.773762	-0.812581	-0.617802	-0.305662	0.0174697	0.229661	0.258351	0.200474	0.140375	0.132629	0.15784	0.230059	0.273993	0.326195	0.361628	0.376718	0.298599	0.100018	-0.147353	-0.277007	-0.152802	0.146531	0.477102	0.642937	0.608036	0.430167	0.191766	-0.0254994	-0.217706	-0.412867	-0.581674	-0.693257	-0.692961	-0.542268	-0.307924	-0.0743206
1.56903	1.28324	1.01612	0.80509	0.671767	0.689455	0.752594	0.752535	0.679779	0.568495	0.433191	0.227525	0.0230673	-0.135309	-0.156004	-0.086113	0.0385526	0.159957	0.23337	0.239368	0.26753	0.30907	0.330934	0.366456	0.393586	0.530481	0.715609	0.905408	0.955896	0.927353	0.817418	0.752123	0.670853	0.549717	0.351712	0.0161453	-0.347463	-0.580868	-0.66175	-0.667113	-0.621686	-0.567132	-0.476841	-0.445219	-0.497385	-0.564024	-0.605578	-0.570622	-0.441848	-0.211025
0.694023	0.835522	0.987107	1.12592	1.19375	1.19895	1.18306	1.13605	1.0927	1.04453	0.997018	0.912089	0.79959	0.670527	0.561536	0.49848	0.464891	0.439545	0.354348	0.253693	0.140598	0.053155	-0.0234616	-0.117019	-0.278912	-0.465374	-0.624631	-0.674229	-0.614225	-0.466233	-0.340111	-0.311401	-0.350319	-0.43756	-0.532072	-0.560484	-0.473313	-0.291858	-0.0516136	0.156224	0.28299	0.319412	0.231393	0.136352	0.0569811	0.0571771	0.042238	-0.0406129	-0.16024	-0.234794
-1.18929	-1.0951	-0.984778	-0.832122	-0.734826	-0.801365	-0.972573	-1.21394	-1.40499	-1.48583	-1.50841	-1.45205	-1.35336	-1.26038	-1.10483	-0.879298	-0.734512	-0.666384	-0.722498	-0.827795	-0.913247	-0.914044	-0.795768	-0.588263	-0.435047	-0.422941	-0.572198	-0.79704	-0.98724	-1.07671	-1.02075	-0.92484	-0.856618	-0.919952	-1.05463	-1.19964	-1.32405	-1.40127	-1.41312	-1.33195	-1.18907	-1.01023	-0.890811	-0.83915	-0.902792	-1.01787	-1.13367	-1.21925	-1.23915	-1.17072
-0.261387	-0.0914167	0.0429887	0.180876	0.301723	0.356462	0.367736	0.354756	0.389943	0.494659	0.688931	0.911411	1.09101	1.10706	1.02033	0.925171	0.874993	0.868193	0.781239	0.511153	0.105886	-0.40896	-0.89514	-1.21302	-1.31192	-1.23775	-1.04506	-0.84396	-0.67756	-0.504423	-0.359481	-0.212058	-0.0879335	-0.0684263	-0.167821	-0.369308	-0.63875	-0.919436	-1.14469	-1.28558	-1.32472	-1.38237	-1.47575	-1.62452	-1.84765	-2.06469	-2.23339	-2.26803	-2.15308	-1.9494
0.379937	0.420429	0.405316	0.374663	0.325572	0.292517	0.323161	0.33276	0.282613	0.122494	-0.106462	-0.439031	-0.757899	-1.04664	-1.20117	-1.28503	-1.33542	-1.356	-1.38575	-1.36825	-1.31015	-1.21024	-1.16571	-1.14416	-1.15945	-1.22059	-1.26137	-1.23136	-1.09259	-0.866772	-0.639016	-0.509051	-0.509934	-0.638921	-0.811133	-0.962849	-1.08117	-1.16655	-1.20393	-1.18424	-1.10767	-1.00302	-0.918638	-0.852903	-0.813255	-0.779965	-0.748224	-0.740727	-0.751139	-0.845284
-0.405743	-0.28339	-0.0360543	0.342574	0.745283	1.10133	1.34838	1.43873	1.38976	1.24956	1.0551	0.82991	0.60207	0.394255	0.235676	0.148875	0.126884	0.160144	0.203801	0.200456	0.168338	0.0884014	0.0411828	0.00634487	-0.0265738	-0.133034	-0.300043	-0.518145	-0.667511	-0.750763	-0.770204	-0.775857	-0.814591	-0.91459	-1.03839	-1.15697	-1.21162	-1.19418	-1.15915	-1.16891	-1.25206	-1.30039	-1.26549	-1.07257	-0.865129	-0.650826	-0.502416	-0.42464	-0.409464	-0.471088
-0.513918	-0.657035	-0.776351	-0.808571	-0.725366	-0.559461	-0.404051	-0.31107	-0.276359	-0.281413	-0.30217	-0.333937	-0.369458	-0.361672	-0.37637	-0.436625	-0.452768	-0.457616	-0.400358	-0.308264	-0.210098	-0.117025	-0.0703973	-0.0819001	-0.156206	-0.265399	-0.420471	-0.637636	-0.90119	-1.14734	-1.42794	-1.6701	-1.79954	-1.73751	-1.55018	-1.38156	-1.34914	-1.44233	-1.52468	-1.56549	-1.51172	-1.44588	-1.36929	-1.356	-1.36445	-1.4113	-1.45236	-1.50573	-1.54217	-1.51651
-1.56807	-1.3504	-0.99008	-0.490153	0.016383	0.346918	0.457374	0.389283	0.191024	-0.00718292	-0.144232	-0.15073	-0.0983221	-0.028195	0.0229655	-0.0296628	-0.0709755	-0.0598939	-0.0184852	-0.0327568	-0.0767092	-0.170889	-0.200978	-0.138672	-0.00409869	0.137493	0.174263	0.138114	0.0247021	-0.137535	-0.396748	-0.597146	-0.808202	-0.95341	-1.02642	-1.04579	-1.01643	-0.954456	-0.829385	-0.6605	-0.505548	-0.478608	-0.508512	-0.546827	-0.573353	-0.536636	-0.496358	-0.49748	-0.491704	-0.538606
0.594422	0.464556	0.324597	0.225437	0.177752	0.191389	0.219281	0.264321	0.366621	0.521701	0.759048	1.00693	1.17548	1.17155	1.04675	0.862099	0.741128	0.721523	0.724374	0.645697	0.463313	0.143096	-0.229611	-0.492621	-0.562058	-0.459429	-0.314417	-0.228774	-0.270414	-0.363846	-0.51385	-0.638916	-0.821932	-0.977977	-1.06741	-1.04742	-0.98063	-0.91481	-0.832964	-0.651913	-0.388271	-0.113563	0.113699	0.163512	0.0619104	-0.142975	-0.31398	-0.309129	-0.183113	0.077432
-0.270671	-0.136151	-0.0396124	0.0682492	0.115511	0.0992484	0.0173659	-0.0767912	-0.147824	-0.15381	-0.182494	-0.221156	-0.287938	-0.457297	-0.641668	-0.79995	-0.872799	-0.875772	-0.853224	-0.827773	-0.747362	-0.672941	-0.608506	-0.50518	-0.422007	-0.383638	-0.432487	-0.541489	-0.668208	-0.795612	-0.952634	-1.12282	-1.32395	-1.58067	-1.78772	-1.92088	-2.00181	-2.06812	-2.18175	-2.30715	-2.36327	-2.29079	-2.12059	-1.88468	-1.59978	-1.3043	-1.05357	-0.897693	-0.825321	-0.795751
-0.431334	-0.314636	-0.288242	-0.307137	-0.341831	-0.313048	-0.132897	0.134033	0.453421	0.717108	0.857164	0.850115	0.642675	0.31222	-0.076446	-0.432335	-0.731809	-0.9365	-1.00632	-0.990198	-0.91836	-0.774735	-0.577871	-0.341504	-0.195427	-0.145112	-0.227087	-0.351662	-0.531921	-0.723973	-0.934375	-1.15982	-1.34961	-1.47689	-1.50217	-1.48114	-1.43282	-1.47391	-1.53275	-1.56609	-1.54648	-1.4411	-1.26409	-0.993645	-0.740008	-0.530656	-0.429673	-0.418745	-0.492528	-0.607844
-0.148405	-0.0739691	-0.0303754	-0.0523534	-0.189707	-0.43433	-0.689481	-0.838947	-0.880858	-0.776083	-0.649035	-0.588963	-0.585697	-0.658437	-0.784174	-0.872478	-0.963662	-1.05747	-1.1864	-1.36422	-1.48464	-1.53072	-1.4896	-1.42049	-1.34519	-1.32739	-1.31947	-1.29518	-1.24674	-1.21314	-1.29236	-1.46221	-1.7424	-2.03019	-2.21624	-2.28267	-2.19197	-1.98194	-1.69252	-1.42403	-1.18692	-1.0095	-0.843502	-0.726818	-0.593266	-0.526422	-0.58145	-0.768182	-1.08608	-1.41666
-0.128184	-0.116154	-0.12055	-0.166615	-0.205964	-0.231453	-0.223834	-0.244611	-0.365526	-0.596536	-0.883746	-1.20207	-1.49194	-1.64089	-1.6384	-1.46908	-1.26135	-1.07864	-1.01489	-1.08282	-1.15645	-1.13557	-1.02496	-0.924437	-0.926715	-1.01306	-1.10742	-1.14664	-1.10942	-1.06587	-0.981039	-0.863886	-0.736286	-0.630168	-0.558553	-0.576568	-0.640342	-0.710005	-0.803153	-0.91117	-1.04755	-1.14657	-1.18815	-1.19929	-1.2031	-1.25992	-1.35459	-1.48664	-1.62381	-1.73975
-0.438226	-0.384918	-0.439954	-0.586663	-0.85746	-1.16125	-1.38138	-1.47523	-1.43667	-1.2966	-1.16406	-1.13058	-1.175	-1.29286	-1.31635	-1.29396	-1.19468	-1.05122	-0.920445	-0.828586	-0.77695	-0.697019	-0.612669	-0.489861	-0.297186	-0.000693781	0.259737	0.400854	0.381966	0.254783	0.113086	-0.0117478	-0.150976	-0.288743	-0.485635	-0.703494	-0.878778	-0.990556	-0.992245	-0.919234	-0.834277	-0.793866	-0.742625	-0.725038	-0.701731	-0.727124	-0.756627	-0.81667	-0.896903	-0.964702
-1.42523	-1.36547	-1.28576	-1.17968	-1.00965	-0.79159	-0.526033	-0.269165	-0.0385335	0.117217	0.149621	0.0564615	-0.130812	-0.348254	-0.50232	-0.550032	-0.504273	-0.396307	-0.292003	-0.173798	-0.0605833	0.0271598	0.0446522	-0.0243599	-0.182988	-0.384781	-0.577314	-0.740556	-0.833872	-0.871813	-0.853205	-0.827165	-0.785005	-0.758967	-0.776742	-0.865442	-1.0018	-1.15727	-1.32385	-1.44063	-1.4573	-1.3491	-1.1743	-0.98457	-0.841443	-0.768949	-0.765644	-0.783971	-0.808567	-0.82124
-0.464036	-0.364833	-0.329543	-0.335051	-0.367031	-0.39503	-0.368238	-0.308512	-0.199594	-0.108161	-0.0205275	0.046887	0.0873126	0.0828919	-0.000984495	-0.116615	-0.208464	-0.274215	-0.315283	-0.308511	-0.359284	-0.367288	-0.373357	-0.388758	-0.367173	-0.257042	-0.0730839	0.140817	0.291958	0.286686	0.115349	-0.17857	-0.467672	-0.642395	-0.712617	-0.699818	-0.644973	-0.622925	-0.601885	-0.557536	-0.485319	-0.427009	-0.364772	-0.285554	-0.22718	-0.214292	-0.281178	-0.408618	-0.585922	-0.798664
-0.317184	-0.118302	0.133874	0.460377	0.745758	0.937109	0.921644	0.708745	0.36372	-0.0315788	-0.303409	-0.402497	-0.407237	-0.348515	-0.286434	-0.275934	-0.395507	-0.579047	-0.808231	-1.01224	-1.17836	-1.21275	-1.15568	-1.04899	-0.926468	-0.805705	-0.68157	-0.530629	-0.44346	-0.453556	-0.595621	-0.81729	-1.10051	-1.30108	-1.42582	-1.50994	-1.56334	-1.66599	-1.84535	-2.02908	-2.15061	-2.09118	-1.81772	-1.36969	-0.867263	-0.460293	-0.212641	-0.0860282	-0.066155	-0.110146
0.47071	0.585208	0.643238	0.575678	0.416125	0.204048	0.00634989	-0.15571	-0.270803	-0.30474	-0.255082	-0.124431	0.0615233	0.248509	0.385765	0.449675	0.501945	0.642348	0.863167	1.1066	1.27424	1.33731	1.35918	1.37885	1.40796	1.42602	1.40611	1.33658	1.27007	1.25246	1.30596	1.4427	1.64107	1.8534	2.03941	2.1532	2.18577	2.18202	2.16531	2.17201	2.11758	1.97747	1.74059	1.51291	1.23201	0.895393	0.53131	0.140366	-0.104293	-0.208128
0.0627486	-0.108553	-0.197444	-0.211676	-0.163417	-0.0992805	-0.0644973	-0.0114648	0.0888259	0.18469	0.247725	0.250631	0.259922	0.357519	0.521968	0.732032	0.910626	1.03721	1.11772	1.20127	1.26551	1.30713	1.27909	1.19518	1.12027	1.06287	1.03929	1.03777	1.0232	0.996156	0.928091	0.940702	1.07098	1.29672	1.50082	1.62514	1.66114	1.70663	1.79357	1.87854	1.86054	1.68768	1.39485	1.0798	0.765389	0.472084	0.252183	0.209167	0.341202	0.652024
-0.95984	-0.972756	-1.02966	-1.1115	-1.20705	-1.31652	-1.31852	-1.16228	-0.839116	-0.376006	0.082759	0.460177	0.700844	0.816361	0.832788	0.867718	0.894132	0.961337	1.052	1.13188	1.13097	1.02878	0.918887	0.858949	0.861077	0.875486	0.829284	0.627751	0.309376	0.018424	-0.0905726	-0.0225533	0.130343	0.283538	0.38071	0.439787	0.456127	0.474503	0.505155	0.560115	0.612909	0.678367	0.699913	0.594261	0.328596	-0.0705011	-0.436931	-0.761365	-0.974793	-1.06144
0.529406	0.461506	0.373041	0.338335	0.323897	0.311759	0.256358	0.153629	0.0844152	0.0778104	0.164706	0.218304	0.24334	0.210468	0.188188	0.209097	0.290794	0.409842	0.498275	0.525089	0.481818	0.332218	0.104152	-0.141464	-0.329864	-0.411105	-0.411078	-0.340058	-0.205607	-0.0910086	-0.0161004	-0.0405204	-0.179917	-0.400888	-0.614032	-0.682754	-0.61267	-0.465776	-0.293027	-0.126198	0.00701909	0.11926	0.165898	0.0889234	-0.0885275	-0.281952	-0.409952	-0.436492	-0.424852	-0.437844
-0.902774	-0.876269	-0.836632	-0.779166	-0.690747	-0.594699	-0.482232	-0.364757	-0.207865	-0.0554787	0.0447398	0.116218	0.16282	0.201379	0.252059	0.311582	0.381219	0.479682	0.587267	0.704352	0.782655	0.781111	0.698221	0.552991	0.371284	0.232018	0.182376	0.249882	0.39822	0.532415	0.614069	0.618415	0.575231	0.492921	0.413088	0.358454	0.331949	0.328063	0.36633	0.440045	0.508547	0.554488	0.558962	0.520421	0.45687	0.374897	0.30206	0.240013	0.193699	0.15307
0.290428	0.186635	0.163645	0.206021	0.297431	0.330227	0.378424	0.465744	0.611338	0.779725	0.916898	0.946646	0.879894	0.721498	0.52767	0.397553	0.321671	0.323599	0.305606	0.24557	0.126165	-0.064423	-0.234057	-0.220567	0.0620917	0.549766	1.12853	1.59678	1.86187	1.91028	1.75339	1.43791	1.00148	0.597853	0.313651	0.228478	0.273977	0.3734	0.381676	0.277707	0.0916014	-0.125134	-0.294284	-0.342029	-0.223436	-0.0321929	0.158772	0.262604	0.333369	0.399627
-1.18276	-1.35452	-1.49385	-1.52996	-1.48904	-1.3599	-1.20809	-1.09797	-1.11499	-1.20735	-1.32912	-1.3871	-1.35813	-1.25815	-1.06364	-0.815602	-0.528373	-0.209236	0.0514492	0.183282	0.153017	0.0161777	-0.142897	-0.206603	-0.154032	-0.0120434	0.154026	0.225607	0.168057	0.00193118	-0.296814	-0.673037	-1.0208	-1.22527	-1.16863	-0.857481	-0.423739	-0.0771189	0.0743779	0.0151425	-0.237574	-0.57587	-0.865323	-1.0657	-1.18862	-1.24858	-1.22876	-1.15751	-1.00462	-0.793394
1.0059	1.08124	1.11969	1.0656	0.93374	0.73032	0.594855	0.50381	0.544885	0.704375	0.911351	1.03075	0.961451	0.751672	0.471602	0.302487	0.312391	0.557273	0.904631	1.23911	1.45264	1.55911	1.53904	1.47598	1.43147	1.42783	1.40399	1.354	1.24588	1.03334	0.827024	0.669021	0.588645	0.558952	0.499451	0.400749	0.279769	0.166387	0.107058	0.0452975	-0.0325378	-0.115575	-0.185042	-0.202526	-0.143827	-0.13695	-0.116255	-0.115748	-0.114503	-0.123926
0.887324	0.88406	0.907226	0.964785	1.01738	1.05571	1.04058	0.979456	0.882239	0.776183	0.679265	0.619292	0.630666	0.699153	0.839402	1.01114	1.14676	1.22463	1.25142	1.23894	1.23712	1.25198	1.28448	1.32647	1.35709	1.32935	1.24843	1.1354	1.03143	0.973883	0.955929	0.979656	0.975386	0.961077	0.917226	0.870807	0.830506	0.793711	0.792087	0.82495	0.896867	0.969295	1.04167	1.09751	1.12609	1.12201	1.10122	1.09218	1.05918	1.01374
1.36638	1.16422	0.948536	0.755075	0.605468	0.484372	0.360784	0.199736	-0.0232618	-0.240031	-0.342617	-0.308667	-0.161854	-0.00624705	0.125693	0.17707	0.151361	0.0787916	0.0722401	0.127331	0.189627	0.234135	0.309188	0.40655	0.529753	0.689724	0.863163	1.01866	1.1235	1.11203	1.03634	0.964937	0.974594	1.02648	1.07052	1.06309	0.993345	0.836351	0.682835	0.561539	0.391659	0.134025	-0.179269	-0.510369	-0.809669	-1.08415	-1.28595	-1.34013	-1.30794	-1.17071
-0.160514	-0.0462188	-0.0303606	-0.163722	-0.369125	-0.53102	-0.568908	-0.480928	-0.34003	-0.176928	0.00957759	0.179909	0.301453	0.341751	0.280421	0.108669	-0.188976	-0.521327	-0.815245	-0.932424	-0.822141	-0.561033	-0.275345	-0.0485791	0.0492217	-0.0134141	-0.132218	-0.290725	-0.416069	-0.478433	-0.44643	-0.37111	-0.306566	-0.261771	-0.225823	-0.209579	-0.206285	-0.219932	-0.297796	-0.428919	-0.567001	-0.751163	-0.91793	-1.06088	-1.0796	-1.00948	-0.930449	-0.842095	-0.726854	-0.677114
-0.514632	-0.244793	0.0216618	0.255168	0.397832	0.404801	0.365465	0.290926	0.190731	0.0998697	-0.0156002	-0.0945325	-0.137427	-0.0658902	0.114264	0.317262	0.381104	0.266464	0.02875	-0.195869	-0.2508	-0.172918	-0.13265	-0.146855	-0.238907	-0.333347	-0.336202	-0.25056	-0.185515	-0.153668	-0.164215	-0.212035	-0.313461	-0.359096	-0.394839	-0.307483	-0.179273	0.0499727	0.234829	0.356586	0.451111	0.490591	0.538455	0.515039	0.444731	0.247995	-0.0716777	-0.437954	-0.744003	-0.949534
-2.6051	-2.70444	-2.76321	-2.80025	-2.81756	-2.80887	-2.76255	-2.61696	-2.35611	-2.02398	-1.65776	-1.35754	-1.14567	-1.00044	-0.880257	-0.751522	-0.650535	-0.547824	-0.471052	-0.376391	-0.264481	-0.159112	-0.101278	-0.0653201	-0.0309957	0.0198033	0.083489	0.116606	0.111103	0.0347658	-0.047632	-0.058895	0.00259069	0.115377	0.187198	0.168391	0.0420255	-0.145153	-0.346248	-0.505177	-0.648235	-0.76217	-0.874998	-1.0128	-1.18234	-1.32228	-1.39319	-1.38254	-1.32798	-1.29375
-0.254577	-0.217673	-0.164234	-0.0368607	0.161112	0.389261	0.626759	0.756894	0.788408	0.691775	0.510893	0.336273	0.175078	0.00451123	-0.196363	-0.42279	-0.672383	-0.863229	-0.986474	-0.987617	-0.864094	-0.669863	-0.474917	-0.366671	-0.367236	-0.408108	-0.46569	-0.505214	-0.512133	-0.490134	-0.491612	-0.540245	-0.571024	-0.622039	-0.586064	-0.504344	-0.415706	-0.342045	-0.28528	-0.283848	-0.299634	-0.29714	-0.279838	-0.225346	-0.198634	-0.179184	-0.1627	-0.178449	-0.209523	-0.264056
-1.73216	-1.64729	-1.55568	-1.39907	-1.17151	-0.844197	-0.471051	-0.178468	-0.0285462	-0.0449478	-0.144095	-0.264848	-0.283961	-0.176658	0.0100144	0.193443	0.376324	0.531696	0.622357	0.628593	0.582251	0.509179	0.431138	0.400322	0.400207	0.394899	0.349642	0.335437	0.308674	0.243737	0.120595	-0.0262022	-0.166301	-0.265178	-0.284201	-0.217773	-0.0936731	-0.0303491	-0.0128958	-0.00949255	-0.0420754	-0.0817811	-0.122801	-0.151993	-0.132593	-0.07729	-0.0077665	0.0459855	0.0522768	0.0134173
0.446285	0.502145	0.623248	0.754261	0.841097	0.868496	0.86307	0.877165	0.960098	1.0355	1.04566	0.966076	0.818913	0.683561	0.588783	0.563394	0.578769	0.561143	0.461429	0.269714	0.0417216	-0.0779007	-0.0524553	0.0912774	0.221673	0.235552	0.137479	-0.00557519	-0.114021	-0.122737	-0.0749558	-0.0477818	-0.0371643	-0.0682199	-0.147001	-0.28231	-0.448833	-0.534027	-0.509367	-0.360719	-0.169566	-0.0109244	0.0659471	0.0773801	0.0695333	0.0918886	0.14867	0.18708	0.135938	-0.035971
-0.304111	-0.264082	-0.276132	-0.300815	-0.316445	-0.331749	-0.332442	-0.27224	-0.201789	-0.106453	-0.0191948	0.0616933	0.169148	0.248062	0.271426	0.218468	0.107056	-0.0108695	-0.0224705	0.0287968	0.1375	0.23418	0.374315	0.555788	0.746871	0.944845	1.05076	1.03444	0.950945	0.802501	0.56264	0.234661	-0.0756429	-0.305122	-0.405354	-0.345971	-0.146631	0.11539	0.324374	0.477604	0.499791	0.33775	0.0641625	-0.294478	-0.638607	-0.955352	-1.17118	-1.26083	-1.18147	-1.00495
0.632727	0.61076	0.546988	0.415353	0.245521	0.0329392	-0.183292	-0.424176	-0.588237	-0.724095	-0.782114	-0.814733	-0.824858	-0.793943	-0.731868	-0.641986	-0.518136	-0.35184	-0.208486	-0.130278	-0.210548	-0.424379	-0.700755	-0.91578	-0.998036	-0.901898	-0.711531	-0.424267	-0.150559	0.0829981	0.222632	0.200834	0.0386701	-0.208789	-0.377087	-0.431494	-0.412351	-0.429017	-0.524259	-0.744848	-1.03342	-1.3286	-1.53903	-1.58152	-1.48418	-1.30464	-1.16106	-1.05808	-1.01643	-0.958393
1.02651	0.832724	0.630359	0.473545	0.413959	0.497506	0.720241	1.0073	1.23614	1.33679	1.34866	1.33026	1.29011	1.2193	1.16668	1.13518	1.18261	1.35359	1.57841	1.76527	1.77343	1.65048	1.42574	1.1673	0.89638	0.677417	0.547004	0.522138	0.578465	0.664476	0.792095	0.93873	1.12405	1.3068	1.43936	1.52206	1.48543	1.33091	1.09332	0.846114	0.655216	0.546446	0.483039	0.431254	0.313208	0.136307	-0.0309005	-0.0484111	0.07932	0.351275
-0.0311631	-0.210089	-0.364859	-0.447544	-0.447802	-0.407414	-0.277533	-0.13661	0.0173373	0.141638	0.252896	0.345054	0.411786	0.513543	0.623907	0.794376	0.915401	0.946587	0.821062	0.614664	0.345495	0.0276214	-0.282048	-0.596108	-0.764475	-0.818196	-0.688189	-0.484577	-0.271006	-0.146956	-0.111895	-0.125561	-0.139281	-0.116679	-0.159563	-0.275961	-0.48791	-0.727164	-0.998081	-1.25964	-1.38135	-1.31006	-1.07034	-0.819175	-0.68874	-0.645132	-0.734258	-0.831052	-0.837457	-0.724337
-0.651573	-0.62693	-0.574274	-0.421093	-0.206015	0.0550741	0.274548	0.370087	0.261503	0.0906345	-0.0264786	-0.0463136	0.0876383	0.219675	0.263901	0.121341	-0.15011	-0.509042	-0.886594	-1.21566	-1.47497	-1.54948	-1.44832	-1.31441	-1.25885	-1.35359	-1.61956	-1.9393	-2.20715	-2.2904	-2.22825	-2.06221	-1.85957	-1.67747	-1.51087	-1.28324	-1.03419	-0.816595	-0.660355	-0.651477	-0.743105	-0.871274	-0.920291	-0.881974	-0.709831	-0.521327	-0.338916	-0.241335	-0.284699	-0.350406
1.23802	1.19917	1.19473	1.21516	1.25495	1.18316	1.01534	0.808208	0.602687	0.507713	0.519727	0.628564	0.749745	0.838054	0.818377	0.722752	0.608956	0.523875	0.469236	0.347237	0.0951042	-0.306958	-0.729772	-1.01861	-1.16839	-1.15316	-1.14298	-1.14688	-1.19381	-1.17498	-1.07871	-0.911713	-0.787593	-0.72234	-0.73261	-0.748852	-0.700441	-0.600857	-0.543726	-0.532129	-0.582581	-0.669449	-0.728366	-0.744968	-0.748373	-0.738354	-0.710348	-0.675751	-0.585984	-0.459309
0.270714	0.262767	0.243185	0.195045	0.129033	0.0244574	-0.0842942	-0.127098	-0.0588263	0.104574	0.360707	0.65091	0.886481	1.05062	1.17277	1.22237	1.22416	1.16279	1.05371	0.94717	0.884257	0.833559	0.759782	0.606168	0.439867	0.28747	0.121328	-0.0167103	-0.162605	-0.245519	-0.230841	-0.157355	-0.0791637	0.00150483	0.0697787	0.11765	0.181032	0.196678	0.196859	0.168142	0.0938697	0.0306173	-0.0444498	-0.102179	-0.0915155	-0.0136443	0.158533	0.300182	0.331717	0.258063
-0.0734108	0.0444664	0.166678	0.31189	0.413859	0.439494	0.360121	0.194358	0.0598969	0.0313409	0.0327071	0.0365685	0.0256561	-0.0218063	-0.0792551	-0.104857	-0.0123971	0.141195	0.255189	0.243371	0.124093	-0.0138443	-0.0777655	-0.124731	-0.136287	-0.164973	-0.27419	-0.444501	-0.596852	-0.611001	-0.497285	-0.321605	-0.205339	-0.181477	-0.289378	-0.387804	-0.399021	-0.267902	-0.0452218	0.182018	0.33856	0.412372	0.395015	0.284922	0.117032	-0.0498942	-0.189878	-0.292697	-0.361494	-0.426441
1.48366	1.2494	1.0215	0.780153	0.577212	0.400652	0.226494	0.091546	0.0367428	0.0359587	0.108548	0.135802	0.162672	0.209496	0.268242	0.281802	0.259751	0.168923	0.0542647	-0.0271308	-0.061654	-0.00622504	0.0494792	0.114213	0.229305	0.396464	0.513833	0.515952	0.36661	0.131536	-0.0866256	-0.16104	-0.0449562	0.183239	0.402918	0.485205	0.451039	0.349938	0.28483	0.176588	0.086335	-0.0109803	-0.12145	-0.206784	-0.239726	-0.22994	-0.181677	-0.138324	-0.128842	-0.123462
0.217504	0.238582	0.229652	0.157976	0.0458195	-0.0225806	-0.0694629	-0.0965819	-0.145909	-0.171253	-0.166936	-0.0935187	-0.0626505	-0.0703827	-0.116284	-0.151814	-0.0804823	0.140995	0.489224	0.850811	1.1149	1.20617	1.0948	0.797307	0.395098	0.0841862	-0.0659533	-0.0589054	0.0326952	0.12737	0.18685	0.189776	0.102301	-0.00747659	-0.0506016	0.00985088	0.107313	0.145208	0.120396	0.0537605	0.00724925	-0.0871632	-0.198971	-0.340362	-0.456095	-0.478801	-0.419795	-0.426887	-0.445706	-0.534259
-0.161132	-0.00472459	0.0884176	0.110575	0.00291514	-0.176629	-0.37317	-0.510339	-0.561894	-0.474947	-0.311321	-0.111963	0.0867914	0.194022	0.263826	0.311108	0.304656	0.250195	0.169014	0.0544906	-0.0318546	-0.0343518	0.0825401	0.308364	0.51248	0.591171	0.528416	0.328963	0.0401374	-0.225481	-0.3578	-0.404876	-0.323247	-0.165328	0.032911	0.171174	0.201391	0.16493	0.108805	0.0468953	-0.0336736	-0.116523	-0.319678	-0.51445	-0.609327	-0.571462	-0.39808	-0.0625529	0.314555	0.66657
0.416637	0.452934	0.464693	0.46829	0.481013	0.517072	0.608991	0.743357	0.837092	0.864124	0.800186	0.69513	0.602985	0.549952	0.577425	0.648142	0.724164	0.812456	0.860607	0.836962	0.764944	0.698113	0.718977	0.801906	0.938551	1.10265	1.2009	1.23953	1.21525	1.18344	1.17726	1.18133	1.12612	0.966557	0.726491	0.402201	0.127254	-0.044063	-0.0636163	0.0729316	0.273315	0.484383	0.698386	0.865267	0.9758	1.08957	1.15909	1.19381	1.19282	1.15313
0.199219	0.217691	0.208302	0.244002	0.20004	0.164184	0.0688407	-0.0421321	-0.111214	-0.107993	-0.0280864	0.0868762	0.253113	0.425021	0.551613	0.549406	0.431707	0.23043	0.021853	-0.151028	-0.20284	-0.187927	-0.066145	0.045339	0.119606	0.103234	-0.00946416	-0.221309	-0.373517	-0.511785	-0.490719	-0.434602	-0.356954	-0.183688	0.00566031	0.153192	0.168398	0.00561589	-0.2274	-0.397441	-0.405904	-0.269167	-0.0861834	0.079586	0.184871	0.190621	0.0968675	-0.0769873	-0.277679	-0.472087
0.27934	0.287485	0.238667	0.161576	0.0838493	0.0338123	0.0979843	0.244681	0.475972	0.63698	0.603148	0.391758	0.0824943	-0.194416	-0.346186	-0.366879	-0.22981	-0.0509363	0.105184	0.199814	0.203693	0.110728	0.00239166	-0.107277	-0.146188	-0.180199	-0.254757	-0.335646	-0.404641	-0.400415	-0.331009	-0.201283	-0.105259	-0.0514886	-0.0256582	0.0204331	0.0891085	0.106552	0.0671139	-0.0255868	-0.154283	-0.282274	-0.453357	-0.631311	-0.77272	-0.853242	-0.890821	-0.899933	-0.960099	-1.03638
-0.778612	-0.728416	-0.600286	-0.391055	-0.121207	0.0998836	0.211603	0.228052	0.269314	0.388523	0.550067	0.681031	0.730245	0.690478	0.624723	0.549812	0.531357	0.537473	0.58389	0.600875	0.633076	0.684104	0.745655	0.779904	0.732967	0.566387	0.430769	0.405579	0.576813	0.842266	1.00895	0.935179	0.620559	0.284605	0.0639059	0.0749112	0.224993	0.368574	0.367323	0.227272	0.0219781	-0.0515757	0.0912775	0.442201	0.861911	1.14853	1.23989	1.17438	0.992861	0.758095
0.607736	0.723124	0.748344	0.609894	0.339101	0.118275	0.0313721	0.169765	0.500736	0.886926	1.16128	1.28599	1.24245	1.13117	0.993978	0.849781	0.714174	0.55599	0.44095	0.347774	0.30725	0.369683	0.479698	0.536651	0.503955	0.456654	0.416658	0.417239	0.392697	0.34543	0.244175	0.142553	0.0941246	0.0897816	0.110222	0.162479	0.221625	0.206631	0.123474	-0.0275276	-0.118014	-0.105635	-0.00327827	0.107389	0.154296	0.0769125	-0.141393	-0.384821	-0.577058	-0.694058
-0.65262	-0.669227	-0.55703	-0.367081	-0.16857	0.0216762	0.161015	0.339163	0.543043	0.700975	0.817778	0.901655	0.98905	1.08149	1.15486	1.14236	0.986099	0.693451	0.354852	0.0633952	-0.0524519	0.00221289	0.12853	0.182321	0.0551844	-0.218694	-0.43554	-0.643327	-0.720401	-0.694589	-0.485479	-0.206589	0.0975802	0.321231	0.420167	0.315221	-0.00682604	-0.363275	-0.634359	-0.673352	-0.653298	-0.643269	-0.741917	-0.94211	-1.13769	-1.1718	-0.962712	-0.597708	-0.23744	-0.0294752
1.10138	1.02563	0.934761	0.808097	0.663881	0.505731	0.358449	0.232394	0.130237	-0.0347009	-0.329929	-0.669532	-0.986571	-1.08248	-0.983773	-0.752477	-0.465531	-0.188292	0.0870651	0.298204	0.430027	0.406401	0.305908	0.181978	0.0903273	0.103245	0.188355	0.30217	0.392692	0.446175	0.465088	0.448644	0.420296	0.419331	0.409795	0.324704	0.177212	-0.0271961	-0.218657	-0.310064	-0.345165	-0.354962	-0.30477	-0.194268	-0.000313438	0.171118	0.240586	0.232419	0.175868	0.102413
0.396439	0.294517	0.188858	0.14474	0.143351	0.133988	0.0876851	0.0619821	0.0450903	0.0745545	0.150823	0.281963	0.393777	0.417922	0.322774	0.181934	0.104197	0.132221	0.311572	0.535113	0.729273	0.801278	0.78723	0.756108	0.701706	0.601723	0.393925	0.108632	-0.197046	-0.451997	-0.579845	-0.561264	-0.520048	-0.477139	-0.458632	-0.43711	-0.370273	-0.335201	-0.337441	-0.41457	-0.499422	-0.582623	-0.59742	-0.576663	-0.532211	-0.461715	-0.436588	-0.420795	-0.427551	-0.491634
-0.339139	-0.420657	-0.466791	-0.416414	-0.299693	-0.151922	-0.01905	0.0739445	0.163542	0.285529	0.412622	0.483429	0.52933	0.554626	0.612998	0.691177	0.844674	1.01717	1.19308	1.33001	1.39205	1.36325	1.2099	0.890591	0.493298	0.208695	0.139035	0.265102	0.401082	0.494021	0.511467	0.467918	0.406726	0.321684	0.205099	0.038973	-0.145735	-0.293793	-0.378638	-0.415382	-0.382903	-0.337527	-0.354412	-0.494957	-0.701386	-0.878233	-0.885174	-0.699615	-0.346971	0.0725468
-0.724274	-0.575681	-0.48301	-0.451319	-0.499455	-0.602885	-0.644464	-0.639047	-0.521102	-0.379693	-0.25791	-0.167883	-0.0834374	-0.0430594	-0.0459816	-0.133707	-0.321495	-0.430254	-0.485888	-0.461461	-0.415682	-0.340493	-0.229492	-0.118746	-0.0819174	-0.0726155	0.0137968	0.132548	0.215256	0.21499	0.103977	-0.0914934	-0.246985	-0.306202	-0.271115	-0.197441	-0.130513	-0.106663	-0.104302	-0.126262	-0.16739	-0.248377	-0.328459	-0.368443	-0.361109	-0.324758	-0.303488	-0.296727	-0.304951	-0.314587
-0.724274	-0.575681	-0.48301	-0.451319	-0.499455	-0.602885	-0.644464	-0.639047	-0.521102	-0.379693	-0.25791	-0.167883	-0.0834374	-0.0430594	-0.0459816	-0.133707	-0.321495	-0.430254	-0.485888	-0.461461	-0.415682	-0.340493	-0.229492	-0.118746	-0.0819174	-0.0726155	0.0137968	0.132548	0.215256	0.21499	0.103977	-0.0914934	-0.246985	-0.306202	-0.271115	-0.197441	-0.130513	-0.106663	-0.104302	-0.126262	-0.16739	-0.248377	-0.328459	-0.368443	-0.361109	-0.324758	-0.303488	-0.296727	-0.304951	-0.314587
-0.724274	-0.575681	-0.48301	-0.451319	-0.499455	-0.602885	-0.644464	-0.639047	-0.521102	-0.379693	-0.25791	-0.167883	-0.0834374	-0.0430594	-0.0459816	-0.133707	-0.321495	-0.430254	-0.485888	-0.461461	-0.415682	-0.340493	-0.229492	-0.118746	-0.0819174	-0.0726155	0.0137968	0.132548	0.215256	0.21499	0.103977	-0.0914934	-0.246985	-0.306202	-0.271115	-0.197441	-0.130513	-0.106663	-0.104302	-0.126262	-0.16739	-0.248377	-0.328459	-0.368443	-0.361109	-0.324758	-0.303488	-0.296727	-0.304951	-0.314587
0.631028	0.728522	0.750098	0.674037	0.499884	0.270562	0.0975892	-0.0306068	-0.126271	-0.191237	-0.228128	-0.178658	-0.0144351	0.174141	0.304322	0.358522	0.36284	0.378025	0.393842	0.46349	0.599846	0.763755	0.910422	0.976741	0.932341	0.847969	0.791469	0.739763	0.701626	0.618474	0.501522	0.333454	0.130583	-0.0591292	-0.235057	-0.395135	-0.527881	-0.600153	-0.627545	-0.57963	-0.512309	-0.508347	-0.592541	-0.663443	-0.649162	-0.493933	-0.234043	0.0512131	0.303016	0.486936
-0.0865984	-0.17438	-0.255151	-0.335454	-0.353697	-0.261566	-0.110426	0.0890569	0.231748	0.27819	0.260596	0.27914	0.341747	0.505809	0.710298	0.828564	0.781559	0.595919	0.327833	0.0622626	-0.246859	-0.508343	-0.68864	-0.813152	-0.882063	-0.930513	-0.911177	-0.786632	-0.602474	-0.348048	-0.0791062	0.157913	0.302294	0.35369	0.275524	0.114284	-0.0793599	-0.246997	-0.363628	-0.380188	-0.318655	-0.268345	-0.299436	-0.420673	-0.582807	-0.73223	-0.832024	-0.866184	-0.840534	-0.786614
0.840736	0.672439	0.484655	0.316744	0.165328	0.0664877	0.0119075	0.0188885	0.0679362	0.11206	0.193018	0.28245	0.3773	0.472022	0.545366	0.605665	0.684276	0.738262	0.778439	0.779929	0.791433	0.856113	0.905306	0.924738	0.865907	0.796108	0.64821	0.439496	0.229954	0.129906	0.156706	0.244714	0.355601	0.387252	0.353874	0.320472	0.338455	0.360593	0.352912	0.233057	0.0500506	-0.12309	-0.233407	-0.265499	-0.244094	-0.266188	-0.416306	-0.627147	-0.865774	-1.06095
0.560123	0.206477	-0.132191	-0.281559	-0.223986	0.0177359	0.263419	0.377167	0.381748	0.243023	0.086182	-0.0397034	-0.0488244	-0.0104655	0.0493985	0.0777287	0.0869545	0.100477	0.159057	0.294644	0.385443	0.419683	0.299379	0.12003	-0.0869765	-0.208064	-0.198692	-0.0130066	0.26186	0.495759	0.659801	0.694631	0.62073	0.488324	0.37833	0.299744	0.28169	0.258907	0.253511	0.254485	0.239081	0.131644	-0.0411732	-0.210522	-0.380618	-0.521797	-0.654507	-0.760436	-0.847181	-0.948068
0.185496	0.0399702	-0.0669526	-0.059424	0.0344607	0.142613	0.23345	0.228554	0.131219	0.0283291	-0.0685647	-0.146606	-0.198259	-0.156318	-0.0485834	0.0736571	0.135551	0.143507	0.0860431	-0.0755067	-0.282563	-0.513715	-0.685497	-0.805209	-0.864752	-0.951503	-0.978654	-0.896657	-0.728748	-0.482311	-0.202042	0.048533	0.183936	0.275283	0.314468	0.26744	0.138839	-0.102688	-0.381568	-0.648996	-0.840432	-0.996566	-1.1284	-1.31831	-1.53016	-1.7099	-1.85515	-1.90694	-1.89449	-1.83296
0.969392	0.888571	0.819898	0.711498	0.610248	0.53779	0.371676	0.171788	-0.10126	-0.348537	-0.48125	-0.434517	-0.197548	0.13862	0.449171	0.623344	0.665555	0.606869	0.50472	0.399182	0.338855	0.386766	0.511986	0.657193	0.711575	0.655848	0.525553	0.452796	0.462623	0.517942	0.617928	0.748159	0.907227	0.985257	1.00607	0.915813	0.672184	0.216209	-0.314567	-0.838997	-1.18824	-1.39401	-1.48552	-1.41401	-1.24331	-1.05516	-1.0151	-1.09801	-1.31447	-1.51822
-0.451489	-0.367927	-0.260966	-0.11116	0.0309158	0.0850901	0.0570769	0.0115826	-0.00410903	0.0757424	0.210005	0.305159	0.328449	0.240474	0.110493	-0.025013	-0.162065	-0.256478	-0.28462	-0.231955	-0.148931	-0.0772516	-0.0959771	-0.231302	-0.467054	-0.678718	-0.789373	-0.767287	-0.6427	-0.443937	-0.206657	0.00263035	0.183544	0.304665	0.347711	0.325774	0.256858	0.195844	0.187469	0.189746	0.112881	-0.051915	-0.301265	-0.577557	-0.890979	-1.21543	-1.52621	-1.78993	-1.90393	-1.83015
0.392379	0.5297	0.612221	0.547145	0.403573	0.203072	0.112403	0.142939	0.314264	0.545326	0.705371	0.803401	0.78279	0.709842	0.583425	0.48314	0.352508	0.213836	0.0722097	-0.062692	-0.220631	-0.402779	-0.502437	-0.549589	-0.481265	-0.376177	-0.296038	-0.267402	-0.270868	-0.260904	-0.204455	-0.179898	-0.14313	-0.112772	-0.129798	-0.224149	-0.384254	-0.61884	-0.970119	-1.3543	-1.62701	-1.71924	-1.66812	-1.5458	-1.3924	-1.24453	-1.14872	-1.0173	-0.923938	-0.924379
-0.838353	-0.80414	-0.846025	-0.949787	-1.03933	-1.16697	-1.27101	-1.2778	-1.15063	-0.892593	-0.581073	-0.33441	-0.271691	-0.411578	-0.656368	-0.859698	-0.98137	-0.96181	-0.836193	-0.642246	-0.465938	-0.326754	-0.215506	-0.122237	-0.0524348	0.0334712	0.130681	0.137936	0.0915935	-0.0256723	-0.135187	-0.21859	-0.276267	-0.324636	-0.373356	-0.449319	-0.522883	-0.556019	-0.572036	-0.578409	-0.59315	-0.654066	-0.685992	-0.700891	-0.739877	-0.801568	-0.87466	-0.928641	-0.935582	-0.963397
-0.991999	-0.832492	-0.644617	-0.444598	-0.274604	-0.206732	-0.265874	-0.482156	-0.725233	-0.864732	-0.855907	-0.7191	-0.539944	-0.346291	-0.203959	-0.0665238	-0.0136091	-0.0565813	-0.172092	-0.27078	-0.286018	-0.165031	0.0188104	0.233029	0.400906	0.464885	0.469572	0.435378	0.396296	0.34307	0.275482	0.193314	0.0895868	-0.0617755	-0.189801	-0.281476	-0.275644	-0.147172	-0.0201634	-0.00617026	-0.10407	-0.260673	-0.309366	-0.248808	-0.0965388	0.085573	0.189023	0.265928	0.309931	0.282617
-0.665632	-0.566935	-0.381942	-0.158807	0.00109781	0.0663256	0.0457799	-0.0524704	-0.211606	-0.298123	-0.280426	-0.134925	0.0637778	0.167491	0.0926691	-0.12714	-0.387255	-0.554789	-0.599607	-0.547444	-0.470432	-0.389115	-0.316956	-0.278852	-0.266928	-0.235409	-0.187915	-0.15209	-0.116285	-0.0504792	0.0556728	0.0604921	-0.0303861	-0.218029	-0.416157	-0.607369	-0.740559	-0.892234	-1.06957	-1.31075	-1.54854	-1.70839	-1.73948	-1.67961	-1.5306	-1.38969	-1.27685	-1.24441	-1.20599	-1.16096
1.2294	1.33623	1.46609	1.63553	1.73302	1.79201	1.76322	1.64775	1.40354	1.06105	0.601002	0.193065	-0.0332326	-0.0281554	0.198451	0.506393	0.758083	0.859889	0.764877	0.563814	0.298496	0.0741494	-0.0490303	-0.0504927	0.00888356	0.0114079	-0.125566	-0.370576	-0.650516	-0.820477	-0.767119	-0.575658	-0.310942	-0.165449	-0.167449	-0.301674	-0.510343	-0.743906	-0.925623	-0.952813	-0.883762	-0.70763	-0.513186	-0.358074	-0.308243	-0.324424	-0.31515	-0.231526	-0.139774	-0.144007
0.0361221	0.26854	0.479193	0.605836	0.61527	0.544023	0.482163	0.442423	0.526672	0.669186	0.793003	0.818847	0.670866	0.44334	0.196036	0.00671565	-0.100745	-0.0414044	0.107712	0.309414	0.480887	0.580061	0.618722	0.602367	0.562861	0.41796	0.219075	-0.0394728	-0.289468	-0.425423	-0.400062	-0.305156	-0.162784	-0.0302131	0.0963911	0.201133	0.290895	0.318172	0.312152	0.251648	0.196854	0.100826	-0.0645249	-0.27798	-0.561151	-0.792525	-0.892361	-0.818638	-0.5978	-0.337269
-0.0649607	-0.117071	-0.213118	-0.338583	-0.401611	-0.403399	-0.369719	-0.316176	-0.327408	-0.461618	-0.733668	-1.02822	-1.30622	-1.53358	-1.69433	-1.72251	-1.57129	-1.31501	-1.07858	-0.955526	-0.962228	-1.06189	-1.09599	-1.00528	-0.837693	-0.677406	-0.589477	-0.637717	-0.731222	-0.761305	-0.759646	-0.654358	-0.584949	-0.600061	-0.742747	-0.922385	-1.10684	-1.24041	-1.32996	-1.39678	-1.42431	-1.46791	-1.48296	-1.40752	-1.2966	-1.1691	-1.01466	-0.889804	-0.838284	-0.80798
0.810522	0.906757	0.901287	0.734305	0.420322	0.0597103	-0.202736	-0.3407	-0.36825	-0.366138	-0.33026	-0.18666	0.0508298	0.267392	0.343248	0.222058	-0.000572302	-0.191964	-0.246492	-0.153901	-0.000384274	0.191769	0.360052	0.484986	0.500438	0.448699	0.326338	0.173509	0.0396121	-0.00989204	0.0788537	0.215971	0.347064	0.429383	0.473817	0.526628	0.606491	0.659507	0.612663	0.473746	0.309098	0.140316	0.018072	-0.0386893	-0.023916	0.0168158	0.00392352	-0.11009	-0.235991	-0.379689
0.212565	0.222178	0.304606	0.383259	0.445019	0.485246	0.381943	0.195681	-0.0177794	-0.184014	-0.227204	-0.223781	-0.27232	-0.399482	-0.549046	-0.610946	-0.52843	-0.364744	-0.208576	-0.214474	-0.351271	-0.577744	-0.726952	-0.765289	-0.703682	-0.625271	-0.54894	-0.484679	-0.413849	-0.336717	-0.247743	-0.149247	-0.114751	-0.0978439	-0.108751	-0.0938138	-0.0899351	-0.13303	-0.161652	-0.144789	-0.0647866	0.0293133	0.0605329	-0.105495	-0.446493	-0.842184	-1.08945	-1.12826	-0.955736	-0.718787
-1.80829	-1.75736	-1.70582	-1.65637	-1.62358	-1.61223	-1.64233	-1.71621	-1.84143	-2.00465	-2.18903	-2.37688	-2.56192	-2.7264	-2.86319	-2.9754	-3.07776	-3.19604	-3.34286	-3.51216	-3.68027	-3.81107	-3.8814	-3.90857	-3.8945	-3.84983	-3.7496	-3.56705	-3.28206	-2.87313	-2.35096	-1.75543	-1.14663	-0.608238	-0.231007	-0.0809665	-0.197528	-0.571045	-1.14712	-1.849	-2.5452	-3.11809	-3.50918	-3.72526	-3.8265	-3.88297	-3.93508	-3.97903	-4.0039	-3.9926
0.0887824	0.00128479	-0.0824896	-0.154793	-0.164302	-0.0970564	0.0317374	0.174899	0.293712	0.359444	0.390321	0.416798	0.465306	0.547107	0.659926	0.802469	0.952999	1.07334	1.10227	1.01071	0.809827	0.537902	0.239574	-0.0553417	-0.326769	-0.534456	-0.675037	-0.750943	-0.771316	-0.744035	-0.713702	-0.727721	-0.802121	-0.920282	-1.0694	-1.23396	-1.39895	-1.59478	-1.81865	-2.05301	-2.24079	-2.34704	-2.38165	-2.39294	-2.43446	-2.54749	-2.75735	-3.05466	-3.40899	-3.75894
0.532026	0.532899	0.562741	0.62287	0.734034	0.875108	1.03487	1.19041	1.30983	1.37235	1.38302	1.36145	1.33783	1.32832	1.33068	1.34624	1.3518	1.34462	1.31259	1.23391	1.09964	0.898302	0.639189	0.331664	0.0213066	-0.253359	-0.452279	-0.566586	-0.60417	-0.594829	-0.578673	-0.57361	-0.573024	-0.565226	-0.557549	-0.550236	-0.576032	-0.644187	-0.746401	-0.866856	-0.983902	-1.0904	-1.20483	-1.33953	-1.49057	-1.63335	-1.74915	-1.83891	-1.91029	-1.97725
2.20882	2.17782	2.15667	2.13367	2.11969	2.10258	2.07663	2.03973	2.0006	1.97195	1.97192	1.98152	1.98055	1.92829	1.79599	1.59927	1.37203	1.16403	1.01343	0.936997	0.91995	0.95203	1.01925	1.09317	1.13031	1.09452	0.968592	0.750271	0.462107	0.162256	-0.101369	-0.306878	-0.462712	-0.587107	-0.691812	-0.792041	-0.915219	-1.06837	-1.26032	-1.47088	-1.66683	-1.79655	-1.82507	-1.73448	-1.5512	-1.31295	-1.07348	-0.876159	-0.730293	-0.626077
0.955554	0.937598	0.9288	0.920839	0.941157	0.9771	1.01548	1.0471	1.06478	1.077	1.07634	1.06939	1.02872	0.942271	0.818643	0.711563	0.678114	0.760976	1.02175	1.44107	1.89453	2.21476	2.25186	1.95082	1.38525	0.729193	0.148247	-0.234158	-0.438946	-0.514769	-0.515183	-0.515792	-0.570268	-0.696035	-0.862132	-1.05781	-1.28663	-1.58493	-2.00418	-2.53576	-3.10655	-3.58971	-3.86562	-3.81235	-3.46881	-2.92661	-2.32983	-1.79868	-1.40324	-1.15002
-0.330305	-0.396622	-0.466423	-0.513249	-0.533648	-0.502341	-0.410833	-0.260051	-0.0830798	0.0649608	0.18159	0.268464	0.352495	0.457338	0.580153	0.695161	0.770295	0.787923	0.771175	0.74655	0.728609	0.713605	0.717517	0.711321	0.677404	0.595754	0.429263	0.176337	-0.158809	-0.538919	-0.914652	-1.26137	-1.5536	-1.76272	-1.87667	-1.94931	-2.03778	-2.20799	-2.48441	-2.83316	-3.18739	-3.42598	-3.48387	-3.3336	-3.00956	-2.61713	-2.2649	-2.01694	-1.87659	-1.81899
0.910522	0.847921	0.765577	0.68107	0.624143	0.630703	0.711256	0.825506	0.914838	0.961307	0.963225	0.954567	0.94984	0.944233	0.937013	0.922681	0.910236	0.922433	0.983259	1.10644	1.30854	1.57057	1.84828	2.04758	2.0784	1.90622	1.55883	1.10204	0.635224	0.236469	-0.0722481	-0.286141	-0.421215	-0.47588	-0.491381	-0.51471	-0.588433	-0.730313	-0.94105	-1.17558	-1.34572	-1.38565	-1.26885	-1.02773	-0.718417	-0.397762	-0.13602	0.0569638	0.176523	0.257325
0.910522	0.847921	0.765577	0.68107	0.624143	0.630703	0.711256	0.825506	0.914838	0.961307	0.963225	0.954567	0.94984	0.944233	0.937013	0.922681	0.910236	0.922433	0.983259	1.10644	1.30854	1.57057	1.84828	2.04758	2.0784	1.90622	1.55883	1.10204	0.635224	0.236469	-0.0722481	-0.286141	-0.421215	-0.47588	-0.491381	-0.51471	-0.588433	-0.730313	-0.94105	-1.17558	-1.34572	-1.38565	-1.26885	-1.02773	-0.718417	-0.397762	-0.13602	0.0569638	0.176523	0.257325
-2.21197	-2.0929	-1.90462	-1.65215	-1.37388	-1.12647	-0.939563	-0.832631	-0.789349	-0.778999	-0.750665	-0.650232	-0.459693	-0.218823	0.0223348	0.195099	0.267295	0.265244	0.211896	0.126562	0.0123137	-0.137602	-0.324799	-0.526997	-0.746818	-1.00293	-1.31324	-1.67947	-2.04922	-2.37066	-2.58853	-2.70189	-2.71816	-2.69467	-2.69454	-2.74555	-2.84953	-3.02058	-3.2263	-3.40654	-3.47083	-3.36939	-3.09377	-2.7003	-2.28799	-1.93862	-1.69095	-1.54987	-1.47604	-1.41698
-1.9769	-1.94744	-1.93936	-1.97743	-2.03906	-2.10669	-2.17413	-2.25106	-2.34575	-2.45943	-2.58691	-2.69389	-2.77094	-2.79369	-2.78984	-2.77522	-2.75325	-2.70938	-2.65728	-2.58088	-2.49477	-2.42695	-2.40669	-2.43253	-2.4817	-2.49974	-2.46903	-2.38065	-2.25694	-2.19932	-2.20175	-2.2481	-2.30287	-2.35123	-2.42739	-2.58696	-2.85373	-3.2456	-3.70239	-4.12095	-4.45453	-4.63805	-4.64642	-4.48967	-4.22681	-3.89616	-3.5311	-3.16355	-2.83228	-2.56734
1.09433	1.02384	0.932293	0.797474	0.589369	0.313547	-0.00580195	-0.28702	-0.449326	-0.511538	-0.482975	-0.441013	-0.412583	-0.411055	-0.411602	-0.381298	-0.310682	-0.219134	-0.150389	-0.108547	-0.0957793	-0.0832544	-0.0953212	-0.170892	-0.344479	-0.623554	-0.969556	-1.36207	-1.76044	-2.14289	-2.50531	-2.85547	-3.15363	-3.36017	-3.48422	-3.55681	-3.62112	-3.7269	-3.86481	-4.03768	-4.1769	-4.24542	-4.27018	-4.28377	-4.33746	-4.43063	-4.57268	-4.7411	-4.91857	-5.05024
0.860616	0.774246	0.672873	0.56449	0.467517	0.387852	0.329674	0.304748	0.289633	0.288198	0.297308	0.314586	0.337863	0.342208	0.300726	0.233057	0.185764	0.219312	0.347101	0.540693	0.684215	0.705958	0.545154	0.229351	-0.200705	-0.643506	-1.01778	-1.29482	-1.47724	-1.59083	-1.66408	-1.72384	-1.7687	-1.79753	-1.83754	-1.92437	-2.06029	-2.25495	-2.46493	-2.68268	-2.90507	-3.13592	-3.35671	-3.48478	-3.45539	-3.22873	-2.8432	-2.40348	-2.02654	-1.77481
0.617672	0.43394	0.17076	-0.166733	-0.509805	-0.839194	-1.13728	-1.38836	-1.58288	-1.73307	-1.80832	-1.7898	-1.66298	-1.48789	-1.37256	-1.35913	-1.4993	-1.74105	-2.01903	-2.26337	-2.43268	-2.53396	-2.64799	-2.7976	-2.99437	-3.21082	-3.39586	-3.51228	-3.52321	-3.43415	-3.24348	-2.99234	-2.7398	-2.56391	-2.47999	-2.51362	-2.59593	-2.68086	-2.75009	-2.80833	-2.91495	-3.08483	-3.3131	-3.54736	-3.76141	-3.95569	-4.10847	-4.16573	-4.09324	-3.86668
1.13961	1.246	1.32633	1.35139	1.29753	1.1847	1.0471	0.916472	0.759346	0.555108	0.312829	0.0822242	-0.0499603	-0.0494594	0.0572659	0.247455	0.51078	0.867271	1.29681	1.72052	1.96892	1.91186	1.57338	1.03717	0.449379	-0.0690687	-0.524272	-0.920344	-1.3152	-1.73583	-2.13069	-2.45322	-2.66806	-2.75301	-2.75318	-2.75564	-2.81834	-2.97652	-3.22054	-3.49072	-3.73485	-3.93179	-4.04469	-4.06954	-4.01701	-3.95886	-3.94462	-4.04237	-4.24675	-4.44928
0.248531	0.123369	0.0142137	-0.0410216	-0.029423	0.0551501	0.160276	0.233942	0.256459	0.24094	0.216949	0.240565	0.333209	0.539144	0.836275	1.17968	1.4437	1.58983	1.59934	1.54166	1.46331	1.39573	1.36259	1.358	1.33141	1.21362	0.966435	0.585749	0.0790627	-0.526851	-1.13896	-1.68047	-2.07735	-2.30817	-2.40816	-2.46168	-2.55393	-2.76626	-3.08539	-3.51573	-3.99396	-4.44109	-4.76884	-4.99374	-5.13913	-5.20823	-5.24776	-5.22159	-5.06422	-4.68495
-2.77587	-2.72031	-2.64959	-2.48496	-2.18384	-1.70987	-1.15985	-0.67222	-0.36619	-0.306401	-0.432939	-0.641507	-0.862609	-1.04238	-1.15532	-1.16767	-1.08076	-0.95919	-0.822957	-0.669315	-0.517714	-0.332716	-0.167416	-0.0235979	0.0577016	-0.000250228	-0.228132	-0.580404	-0.950446	-1.23788	-1.38697	-1.43451	-1.39242	-1.29633	-1.21332	-1.18774	-1.23079	-1.40996	-1.74745	-2.18193	-2.60371	-2.91433	-3.02756	-2.90226	-2.54723	-2.09709	-1.69413	-1.41315	-1.18176	-0.917661
0.53229	0.495841	0.443824	0.386102	0.31562	0.232505	0.122941	-0.0100447	-0.149851	-0.253141	-0.313225	-0.347867	-0.400485	-0.520585	-0.71325	-0.962395	-1.20699	-1.40196	-1.5314	-1.59344	-1.5804	-1.49256	-1.35731	-1.20912	-1.10048	-1.03232	-0.994974	-0.978361	-0.963354	-0.946696	-0.944204	-0.93218	-0.890109	-0.825593	-0.762658	-0.760563	-0.850282	-1.01989	-1.22797	-1.42693	-1.58341	-1.67748	-1.71956	-1.71813	-1.669	-1.57737	-1.46431	-1.35869	-1.30889	-1.3346
-0.158515	-0.119757	-0.103864	-0.0957392	-0.0802424	0.00111863	0.161415	0.423903	0.681398	0.890345	0.974792	0.972271	0.948521	0.956035	0.970652	0.994587	1.01725	1.07402	1.22641	1.46532	1.78454	2.10592	2.3449	2.50253	2.59066	2.62601	2.62545	2.6206	2.63527	2.6093	2.49787	2.2343	1.82702	1.26827	0.635901	-0.0253824	-0.607533	-1.0615	-1.32894	-1.37677	-1.2585	-1.10688	-1.04081	-1.05864	-1.09734	-1.07358	-0.88094	-0.629271	-0.327868	-0.0376713
0.415238	0.55724	0.70442	0.846226	0.955596	1.03016	1.1285	1.2364	1.39221	1.60203	1.83436	2.0266	2.16428	2.19848	2.09427	1.82577	1.45752	1.10326	0.85522	0.777766	0.870089	1.03821	1.18436	1.2103	1.07575	0.79119	0.347267	-0.140709	-0.511976	-0.654557	-0.590081	-0.45667	-0.376084	-0.432837	-0.610509	-0.823619	-0.982434	-1.00663	-0.878922	-0.593914	-0.224338	0.0798011	0.22697	0.220727	0.138833	0.093331	0.0934048	0.100106	0.0856085	0.0414692
0.273805	0.499692	0.719044	0.837434	0.808261	0.671677	0.461596	0.271089	0.087525	-0.0566517	-0.153292	-0.233911	-0.266748	-0.218865	-0.129486	-0.0424335	0.0288932	0.0305615	-0.00972679	-0.00518251	0.083716	0.186647	0.2483	0.189916	-0.000928354	-0.187976	-0.28236	-0.204042	-0.00957778	0.261942	0.418941	0.463969	0.381187	0.253719	0.125637	0.0618348	0.0213097	-0.0379231	-0.088189	-0.169432	-0.208174	-0.1869	-0.0677548	0.100157	0.237541	0.246621	0.199173	0.180994	0.213075	0.265636
0.926164	0.983773	1.0101	0.965525	0.846829	0.670636	0.492632	0.381977	0.337777	0.332345	0.309277	0.246314	0.194592	0.144823	0.131683	0.123989	0.147874	0.178197	0.214989	0.222144	0.215015	0.246537	0.31246	0.451038	0.572601	0.65847	0.690321	0.731909	0.747423	0.717335	0.598737	0.353527	0.0342196	-0.312257	-0.562583	-0.613153	-0.505326	-0.2568	0.0154565	0.186776	0.276172	0.266749	0.255047	0.244501	0.252481	0.278948	0.307426	0.234122	0.0450332	-0.160242
-0.682801	-0.645596	-0.628896	-0.670393	-0.739655	-0.84905	-0.853115	-0.712704	-0.426787	-0.13498	0.086768	0.191246	0.218104	0.223875	0.230441	0.230515	0.169023	0.00752686	-0.242276	-0.440555	-0.545441	-0.51752	-0.425221	-0.335433	-0.273937	-0.227853	-0.234211	-0.260534	-0.278946	-0.268842	-0.266332	-0.31684	-0.35791	-0.388314	-0.379379	-0.30483	-0.187121	-0.0405932	0.0780658	0.0942283	0.0288199	-0.116123	-0.272025	-0.370017	-0.319254	-0.150716	0.119127	0.267474	0.23375	0.0648718
1.81495	1.61361	1.33232	1.01563	0.774652	0.710367	0.784534	1.0543	1.39346	1.79623	2.15743	2.25387	2.04953	1.58169	1.04713	0.627846	0.49445	0.509587	0.581386	0.518097	0.34936	0.139883	0.00228627	0.0944401	0.291076	0.493538	0.621807	0.64413	0.510141	0.306229	0.111991	0.0530542	0.170544	0.458853	0.767993	0.925389	0.865971	0.630106	0.276395	-0.0223734	-0.245552	-0.317604	-0.293219	-0.128361	0.0329472	0.0995226	0.0106785	-0.17492	-0.371999	-0.637182
0.497661	0.503218	0.452451	0.291762	0.0716236	-0.221117	-0.415537	-0.488162	-0.356582	-0.13071	0.0997268	0.256785	0.301195	0.231284	-0.00713672	-0.278581	-0.504907	-0.571388	-0.506556	-0.350261	-0.168376	-0.0127294	0.053929	0.0204552	-0.00108126	-0.00620357	0.0485947	0.131051	0.179133	0.154277	0.0817643	0.0238601	-0.00782636	-0.086389	-0.231795	-0.351309	-0.389074	-0.335656	-0.241513	-0.193376	-0.129842	0.00595423	0.179614	0.291217	0.262228	0.0883936	-0.182603	-0.398018	-0.545434	-0.530828
0.754165	0.814817	0.878068	0.848878	0.651693	0.340805	0.0249079	-0.116422	0.0245657	0.351422	0.64626	0.730616	0.614584	0.424727	0.271426	0.229544	0.380111	0.66195	1.00382	1.19489	1.17512	0.973595	0.665975	0.376186	0.173303	0.11904	0.200589	0.356074	0.494747	0.537986	0.528177	0.472165	0.437544	0.446169	0.560727	0.664426	0.731752	0.723442	0.630338	0.499339	0.403535	0.399976	0.495139	0.617745	0.692463	0.671565	0.474637	0.202859	0.0217645	0.0856921
0.437281	0.295017	0.10939	-0.0360559	-0.160837	-0.213361	-0.279049	-0.36867	-0.502576	-0.681936	-0.763628	-0.731288	-0.644839	-0.46346	-0.365352	-0.389297	-0.506602	-0.642017	-0.689547	-0.612229	-0.443919	-0.212523	0.0244951	0.204719	0.326261	0.373536	0.2928	0.111994	-0.0794553	-0.181306	-0.199885	-0.131589	-0.0385315	0.0111415	0.0502731	0.0490063	0.0205879	-0.0427191	-0.132937	-0.216767	-0.238842	-0.272724	-0.266512	-0.249169	-0.261316	-0.314053	-0.470307	-0.694835	-0.916822	-1.0427
-0.666856	-0.518347	-0.359824	-0.177286	0.00118063	0.104249	0.0986854	-0.0397941	-0.229289	-0.469921	-0.762031	-1.09376	-1.25248	-1.23132	-1.08939	-0.849233	-0.650672	-0.501703	-0.450765	-0.447026	-0.459601	-0.54489	-0.725879	-0.779845	-0.770511	-0.652529	-0.507347	-0.3997	-0.311548	-0.247302	-0.168622	-0.0729005	0.0462382	0.211713	0.337579	0.299387	0.12586	-0.103615	-0.319751	-0.46332	-0.533947	-0.516215	-0.404074	-0.187028	0.0805576	0.34431	0.509767	0.478956	0.235507	-0.14516
-0.0465984	-0.151626	-0.262314	-0.317996	-0.282069	-0.142987	0.114719	0.436044	0.755271	1.00729	1.13947	1.1383	1.02688	0.777692	0.45301	0.148702	-0.0228676	-0.00861327	0.14174	0.338956	0.466968	0.473786	0.377221	0.264042	0.218021	0.227834	0.275934	0.349785	0.402467	0.445025	0.430512	0.367555	0.298044	0.270611	0.287397	0.289071	0.297126	0.211219	0.0544594	-0.102454	-0.1873	-0.128852	0.0249506	0.215215	0.336551	0.32571	0.186243	0.0159002	-0.153951	-0.289676
-0.086161	-0.0544087	0.000891434	0.0995728	0.241676	0.418623	0.598023	0.739866	0.825854	0.853634	0.849794	0.825919	0.793786	0.764924	0.746999	0.741315	0.752324	0.772515	0.792453	0.807703	0.810359	0.807319	0.803332	0.794951	0.786898	0.760811	0.712231	0.636276	0.530194	0.411369	0.299532	0.21237	0.158839	0.139146	0.141677	0.151463	0.144163	0.103764	0.0370718	-0.0373585	-0.0937967	-0.125678	-0.138137	-0.155131	-0.206541	-0.310294	-0.455398	-0.612514	-0.753495	-0.872953
0.861576	0.872736	0.878349	0.884808	0.89131	0.896334	0.907338	0.919168	0.935112	0.950883	0.95356	0.934325	0.908948	0.898817	0.939118	1.0527	1.21362	1.37664	1.47488	1.49786	1.45549	1.39247	1.34077	1.3037	1.29546	1.32596	1.40951	1.5238	1.64	1.69417	1.67592	1.58191	1.4331	1.26707	1.099	0.944022	0.794507	0.628975	0.428792	0.181381	-0.108712	-0.414413	-0.695306	-0.922552	-1.0743	-1.16427	-1.2112	-1.23685	-1.25701	-1.27402
-0.251404	-0.222546	-0.189671	-0.155457	-0.110799	-0.0489773	0.0430166	0.154742	0.270255	0.373645	0.459057	0.519276	0.552894	0.575399	0.597159	0.620552	0.640422	0.654498	0.666565	0.699791	0.745315	0.797492	0.834122	0.827208	0.758596	0.628893	0.451975	0.237284	0.00937424	-0.218031	-0.422521	-0.584986	-0.689625	-0.741796	-0.757957	-0.782982	-0.838053	-0.922544	-1.03088	-1.13601	-1.2425	-1.37077	-1.54632	-1.77335	-2.04906	-2.34112	-2.61377	-2.85082	-3.05052	-3.20963
0.660693	0.532679	0.347157	0.0850179	-0.238608	-0.578567	-0.873715	-1.07635	-1.17158	-1.18595	-1.14414	-1.09409	-1.05027	-1.00804	-0.969481	-0.942792	-0.932533	-0.928373	-0.932231	-0.952634	-0.987167	-1.03683	-1.12155	-1.23133	-1.36015	-1.50599	-1.68938	-1.8979	-2.1236	-2.34044	-2.54742	-2.72435	-2.8606	-2.96347	-3.05789	-3.16203	-3.29421	-3.44395	-3.60634	-3.77737	-3.95328	-4.12858	-4.28167	-4.38832	-4.43861	-4.44254	-4.42423	-4.4072	-4.4212	-4.45247
-0.212247	-0.271597	-0.327952	-0.37068	-0.381992	-0.36673	-0.329657	-0.282948	-0.240058	-0.215871	-0.208571	-0.215877	-0.234441	-0.260066	-0.294651	-0.32291	-0.338571	-0.339629	-0.340344	-0.375834	-0.48632	-0.678518	-0.936687	-1.22381	-1.5136	-1.78585	-2.02046	-2.21102	-2.3542	-2.45859	-2.54273	-2.61819	-2.68817	-2.75957	-2.81949	-2.87691	-2.94892	-3.05701	-3.22258	-3.42946	-3.64115	-3.80592	-3.87176	-3.79515	-3.59389	-3.30404	-3.00698	-2.75926	-2.57859	-2.46506
1.02531	0.967857	0.895551	0.829757	0.791645	0.790367	0.817338	0.854931	0.890678	0.92702	0.967891	1.00504	1.03311	1.04104	1.04485	1.0468	1.05096	1.05076	1.0449	1.03787	1.03647	1.03729	1.03376	1.02016	0.975224	0.890062	0.747889	0.56519	0.361973	0.157651	-0.0314323	-0.19237	-0.323432	-0.432525	-0.52761	-0.60798	-0.669057	-0.720488	-0.770699	-0.852229	-0.986895	-1.17626	-1.40438	-1.64747	-1.87419	-2.0689	-2.22663	-2.35883	-2.46466	-2.54005
0.800491	0.820149	0.851388	0.876257	0.894452	0.887372	0.873507	0.857932	0.844272	0.837042	0.845548	0.891982	1.00453	1.20236	1.46175	1.70667	1.85403	1.84489	1.68439	1.42959	1.14496	0.873077	0.606749	0.326918	0.032744	-0.270146	-0.551971	-0.789316	-0.984634	-1.13539	-1.25168	-1.34351	-1.42848	-1.52201	-1.63297	-1.76448	-1.9221	-2.09967	-2.28199	-2.45929	-2.62888	-2.78572	-2.939	-3.08688	-3.19651	-3.23174	-3.15616	-2.93169	-2.57501	-2.12492
0.838936	0.824044	0.80413	0.795497	0.792191	0.79207	0.793727	0.784284	0.755083	0.722643	0.716309	0.742595	0.770447	0.759243	0.673001	0.486923	0.22904	-0.0583248	-0.35122	-0.611145	-0.819851	-0.937092	-0.940974	-0.8405	-0.645087	-0.410117	-0.185393	-0.0440694	-0.0570994	-0.247805	-0.584906	-0.988063	-1.37437	-1.68833	-1.89489	-1.99826	-2.03854	-2.07289	-2.16206	-2.35845	-2.6779	-3.05421	-3.40853	-3.68563	-3.84913	-3.91896	-3.93913	-3.9454	-3.95497	-3.94908
0.183193	0.222114	0.265532	0.29398	0.264831	0.160956	0.0111755	-0.113752	-0.172857	-0.179236	-0.163694	-0.152754	-0.151252	-0.159736	-0.160036	-0.156871	-0.12807	-0.0722382	0.0182213	0.167021	0.367426	0.599609	0.792181	0.885135	0.819837	0.58143	0.191231	-0.292268	-0.788296	-1.23623	-1.60525	-1.89622	-2.1121	-2.26214	-2.35405	-2.39242	-2.38942	-2.35722	-2.33277	-2.33093	-2.36754	-2.44265	-2.56964	-2.74498	-2.93853	-3.1124	-3.23134	-3.29046	-3.30172	-3.28468
0.839976	0.862187	0.88329	0.89659	0.901186	0.896374	0.888399	0.89236	0.911401	0.945598	0.984066	1.01553	1.05673	1.12295	1.23015	1.39438	1.60172	1.82338	2.00291	2.0884	2.04316	1.84567	1.52269	1.13186	0.745241	0.407194	0.143672	-0.0608559	-0.225784	-0.379102	-0.521615	-0.644764	-0.750644	-0.848671	-0.962289	-1.10106	-1.25536	-1.41093	-1.55199	-1.67274	-1.76986	-1.85883	-1.94976	-2.04597	-2.15091	-2.24668	-2.31478	-2.34543	-2.35255	-2.35866
-2.88139	-2.94198	-3.06271	-3.24874	-3.48439	-3.74255	-3.98565	-4.19372	-4.34434	-4.43009	-4.45271	-4.42503	-4.36912	-4.31671	-4.26264	-4.18292	-4.07961	-3.98756	-3.96191	-4.02366	-4.15093	-4.27302	-4.3479	-4.36716	-4.33166	-4.25721	-4.18812	-4.15604	-4.15837	-4.18625	-4.21622	-4.25005	-4.2672	-4.26917	-4.28299	-4.32594	-4.38625	-4.4083	-4.36414	-4.1953	-3.89646	-3.51598	-3.14839	-2.90033	-2.82866	-2.91964	-3.11725	-3.33611	-3.50104	-3.61565
0.58838	0.63163	0.670698	0.689597	0.695255	0.685164	0.673013	0.664854	0.672226	0.697951	0.746364	0.787435	0.818045	0.864718	0.952192	1.08241	1.22641	1.31601	1.28161	1.10477	0.806016	0.441262	0.0653108	-0.294274	-0.620773	-0.904022	-1.14991	-1.35369	-1.53498	-1.71989	-1.92713	-2.17804	-2.46118	-2.73997	-2.99742	-3.20956	-3.37715	-3.50757	-3.59322	-3.6226	-3.61631	-3.58614	-3.56084	-3.55866	-3.57108	-3.59088	-3.61928	-3.64056	-3.67532	-3.70386
0.292094	0.341103	0.36067	0.338907	0.252547	0.150994	0.03607	-0.110245	-0.262475	-0.349773	-0.337454	-0.229813	-0.109924	-0.0474073	-0.084163	-0.214783	-0.465544	-0.777838	-1.05156	-1.21452	-1.1835	-1.00057	-0.81099	-0.64424	-0.546621	-0.500293	-0.437809	-0.341513	-0.191949	-0.0108868	0.085452	0.0989779	0.0277256	-0.0731186	-0.0987125	-0.0622054	0.00189322	-0.0194591	-0.117685	-0.280046	-0.456695	-0.602652	-0.694435	-0.633636	-0.480358	-0.220064	0.0399407	0.225921	0.249731	0.150465
0.81419	0.603119	0.419811	0.292307	0.230394	0.233999	0.282479	0.378152	0.507055	0.56109	0.532584	0.408946	0.285739	0.0970632	-0.0972739	-0.350322	-0.599207	-0.750074	-0.730646	-0.586761	-0.370719	-0.134566	0.0923168	0.280958	0.40607	0.42331	0.344648	0.189565	0.0326118	-0.0778725	-0.0684389	0.068512	0.231535	0.351994	0.422237	0.454542	0.471081	0.425845	0.401379	0.416617	0.386341	0.355402	0.300877	0.289152	0.349779	0.51113	0.694188	0.803477	0.757112	0.627614
0.0371459	0.0133651	-0.0921816	-0.194321	-0.27646	-0.299914	-0.259601	-0.196109	-0.161291	-0.0987775	-0.0197795	0.0295655	0.0362764	0.0189716	-0.0744128	-0.206031	-0.296316	-0.365992	-0.369575	-0.377256	-0.368799	-0.314212	-0.26676	-0.220241	-0.179399	-0.190778	-0.222645	-0.218615	-0.201434	-0.154502	-0.157678	-0.238086	-0.416845	-0.618219	-0.786992	-0.913503	-0.991207	-1.01695	-0.983773	-0.900694	-0.772613	-0.663496	-0.561642	-0.52049	-0.500278	-0.443096	-0.322189	-0.139595	0.0334968	0.115384
0.297197	0.150868	-0.00610277	-0.191882	-0.35786	-0.454124	-0.432055	-0.24028	0.0618289	0.381917	0.568418	0.628807	0.585119	0.504841	0.377518	0.153473	-0.130547	-0.44621	-0.621577	-0.578275	-0.296732	0.141768	0.509677	0.719049	0.726431	0.590021	0.336382	0.0477907	-0.189583	-0.330528	-0.360377	-0.285932	-0.135938	-0.0106085	0.129833	0.265683	0.367998	0.386143	0.300004	0.183471	0.0933668	0.0884484	0.179122	0.396777	0.6485	0.845783	0.913309	0.88682	0.80944	0.742879
-0.261881	-0.319021	-0.289058	-0.175265	-0.0557698	0.0669012	0.125617	0.169735	0.158215	0.124045	0.144741	0.223874	0.332611	0.357902	0.291631	0.162868	0.0722765	0.0527134	0.0439209	-0.0469236	-0.199464	-0.316935	-0.36725	-0.365436	-0.316512	-0.297537	-0.310305	-0.315371	-0.332083	-0.304257	-0.200429	-0.0744195	0.0507378	0.0752995	-0.0492637	-0.24794	-0.445763	-0.517064	-0.403053	-0.226405	-0.0995682	-0.0787694	-0.176398	-0.376198	-0.582798	-0.686461	-0.662543	-0.584922	-0.587823	-0.632854
-0.246356	-0.120825	0.000734104	0.121455	0.240581	0.317686	0.294689	0.0944722	-0.133309	-0.30178	-0.367436	-0.360952	-0.320827	-0.276179	-0.278604	-0.296772	-0.317231	-0.241504	-0.146904	-0.0662079	-0.089528	-0.210348	-0.326065	-0.344242	-0.230347	-0.04892	0.168262	0.399311	0.554379	0.625862	0.564923	0.362906	0.137731	0.0266898	0.000805481	0.0216824	0.057852	0.028672	-0.0143221	-0.0120523	0.0326864	0.0627073	-0.026281	-0.231338	-0.403247	-0.424634	-0.325861	-0.229272	-0.254508	-0.398142
0.206579	0.126145	-0.0124141	-0.158805	-0.362324	-0.540632	-0.606504	-0.576683	-0.422839	-0.195399	0.0438642	0.230171	0.29758	0.237544	0.108777	-0.0333323	-0.0982071	-0.0510156	0.0693573	0.174492	0.165824	0.0593044	-0.143731	-0.354896	-0.463868	-0.462731	-0.377491	-0.23368	-0.115175	-0.0361452	0.0228826	0.0713144	0.146048	0.298266	0.475813	0.675843	0.830206	0.88532	0.835948	0.696263	0.48566	0.273505	0.0929173	0.00327224	-0.0401064	0.0241226	0.10508	0.207417	0.203497	0.063551
0.0177109	0.053385	9.42035e-05	-0.0829621	-0.202219	-0.336482	-0.452685	-0.388651	-0.237039	-0.00776777	0.20727	0.421027	0.570953	0.603651	0.546348	0.434238	0.347081	0.311095	0.342656	0.403238	0.397972	0.266252	0.0791135	-0.117667	-0.310442	-0.46538	-0.54595	-0.559802	-0.487301	-0.358284	-0.209143	-0.089898	-0.0735203	-0.183516	-0.427526	-0.642131	-0.772985	-0.785582	-0.702684	-0.528755	-0.357093	-0.242437	-0.260432	-0.409083	-0.582943	-0.658684	-0.584019	-0.383931	-0.223656	-0.0989745
0.0820944	-0.189623	-0.446229	-0.646166	-0.759186	-0.715591	-0.521436	-0.203309	0.128762	0.387764	0.508911	0.604655	0.645405	0.665427	0.554523	0.344758	0.0847637	-0.156308	-0.251786	-0.252436	-0.136704	0.0250046	0.181303	0.291305	0.310869	0.263456	0.162935	0.0247584	-0.100551	-0.169945	-0.139648	-0.0408631	0.130925	0.315925	0.462344	0.556832	0.594188	0.597539	0.622547	0.64616	0.666062	0.620605	0.547326	0.447901	0.34676	0.248524	0.171232	0.129669	0.0910147	0.122869
-0.622099	-0.42193	-0.263651	-0.186222	-0.239842	-0.359835	-0.487424	-0.519212	-0.473522	-0.380222	-0.260736	-0.118527	0.0304727	0.0878856	0.0515252	-0.081072	-0.244301	-0.407804	-0.428443	-0.309827	-0.11277	0.0855721	0.208107	0.283957	0.332137	0.374976	0.405316	0.4341	0.433948	0.436093	0.396782	0.283554	0.146688	0.0510769	0.0588743	0.131902	0.165326	0.123429	0.0274009	-0.112103	-0.184558	-0.174747	-0.137765	-0.087476	-0.0652041	-0.0218951	0.0289134	0.132789	0.290806	0.46233
1.03143	0.922036	0.888847	0.892026	0.983189	1.05005	1.08853	1.11044	1.0369	0.842625	0.591782	0.349577	0.201936	0.120073	0.117766	0.146028	0.117861	0.0457561	-0.0793132	-0.244733	-0.493141	-0.752879	-0.933112	-0.988194	-0.902732	-0.744374	-0.584965	-0.530646	-0.53922	-0.594699	-0.612974	-0.49358	-0.406071	-0.365498	-0.409958	-0.469691	-0.443881	-0.287391	-0.134217	-0.0820542	-0.115578	-0.123426	-0.012763	0.224506	0.519158	0.708886	0.715176	0.510566	0.189991	-0.176457
0.314609	0.144865	-0.0361803	-0.119334	-0.09608	0.108851	0.364156	0.524528	0.485535	0.293925	0.0277099	-0.184319	-0.248228	-0.253534	-0.226263	-0.181011	-0.105305	0.0403201	0.179067	0.257755	0.270588	0.239135	0.254275	0.313663	0.363886	0.430083	0.503328	0.594202	0.671681	0.69636	0.683682	0.583264	0.460301	0.36055	0.297305	0.215714	0.113414	0.00325782	-0.036673	-0.0150799	0.0336229	0.0307477	-0.0297143	-0.151286	-0.256049	-0.318592	-0.315934	-0.274283	-0.21948	-0.159141
0.540236	0.572346	0.6352	0.646719	0.671152	0.646152	0.553479	0.40439	0.18752	-0.0586137	-0.23323	-0.25669	-0.132772	0.0135511	0.162083	0.209043	0.23026	0.206643	0.118532	-0.0283236	-0.223817	-0.368918	-0.458128	-0.437662	-0.335996	-0.162534	-0.00204755	0.0818967	0.0913377	0.0584047	-0.0188223	-0.161539	-0.248115	-0.261589	-0.191222	-0.0926076	0.00533758	0.0531113	0.0787959	0.0503592	-0.0363692	-0.138128	-0.212757	-0.220499	-0.0631366	0.229456	0.570918	0.884213	1.04221	0.961765
-0.0394036	0.0779874	0.164226	0.202152	0.116909	-0.0947902	-0.331817	-0.472074	-0.431619	-0.269388	-0.115047	-0.0838294	-0.126022	-0.245136	-0.317429	-0.371025	-0.342237	-0.369001	-0.427913	-0.476982	-0.429033	-0.291116	-0.0724592	0.111642	0.174574	0.201446	0.216042	0.310263	0.382394	0.376075	0.24497	0.10209	-0.0378613	-0.102984	-0.0746095	-0.0316208	-0.0369867	-0.0848554	-0.203683	-0.353046	-0.548885	-0.746786	-0.865334	-0.858639	-0.765268	-0.658826	-0.586302	-0.589041	-0.560917	-0.432568
0.584156	0.379631	0.155767	-0.111124	-0.294157	-0.34887	-0.262223	-0.0705886	0.0809424	0.0852337	-0.110096	-0.486629	-0.909969	-1.2349	-1.38111	-1.39882	-1.31123	-1.21898	-1.21344	-1.19683	-1.10004	-0.883183	-0.605503	-0.4519	-0.448095	-0.555004	-0.734113	-0.812827	-0.748354	-0.591489	-0.418035	-0.345199	-0.441042	-0.582257	-0.709995	-0.700651	-0.573963	-0.403498	-0.266734	-0.183795	-0.136132	-0.0558165	0.055227	0.147586	0.257722	0.315397	0.290249	0.183932	0.0188931	-0.157241
0.795905	0.615893	0.399595	0.139494	-0.0955376	-0.267642	-0.332078	-0.305562	-0.197073	-0.0431706	0.0850466	0.152003	0.185475	0.21413	0.137427	0.0280168	-0.222982	-0.523299	-0.785359	-0.888538	-0.842603	-0.723613	-0.699095	-0.695708	-0.673272	-0.601287	-0.457548	-0.292393	-0.150152	-0.1243	-0.201332	-0.346283	-0.442302	-0.450044	-0.358291	-0.149014	0.105704	0.295435	0.442557	0.489338	0.52916	0.48219	0.37441	0.246543	0.0830932	6.12896e-05	0.0316319	0.142611	0.298698	0.434889
-0.600704	-0.648801	-0.688548	-0.691473	-0.657436	-0.558996	-0.421799	-0.281143	-0.169142	-0.124139	-0.146461	-0.183452	-0.202672	-0.230707	-0.269993	-0.291438	-0.310758	-0.280127	-0.201323	-0.0923526	-0.0468924	-0.0425955	-0.0886557	-0.180759	-0.331833	-0.542171	-0.717824	-0.838835	-0.853785	-0.801752	-0.652505	-0.417339	-0.142179	0.153501	0.479668	0.775167	0.912187	0.871883	0.687201	0.495068	0.309009	0.116312	-0.0642097	-0.179731	-0.328745	-0.458673	-0.557584	-0.663528	-0.731838	-0.837301
0.221815	0.303304	0.362072	0.379226	0.347088	0.257522	0.20169	0.170374	0.158999	0.0726023	-0.0368743	-0.0993572	-0.0447746	0.074257	0.12219	0.0473673	-0.145629	-0.354194	-0.488216	-0.509044	-0.469679	-0.460897	-0.499749	-0.529067	-0.544781	-0.517671	-0.403798	-0.199266	0.0459911	0.18147	0.0898403	-0.158831	-0.402277	-0.506745	-0.482902	-0.356969	-0.163985	0.0469783	0.248044	0.371467	0.359638	0.225506	0.0555749	-0.0277803	0.0754455	0.37142	0.675279	0.88006	0.932515	0.906007
0.199429	0.293232	0.321242	0.339583	0.431855	0.485916	0.546491	0.562805	0.49995	0.379793	0.239065	0.0743254	-0.0741132	-0.232457	-0.398968	-0.615839	-0.828814	-0.831824	-0.591784	-0.185067	0.254366	0.443216	0.4251	0.247147	-0.00802622	-0.208283	-0.319398	-0.332306	-0.281938	-0.241951	-0.200318	-0.152026	-0.176451	-0.181833	-0.174856	-0.110661	-0.00214336	0.0829178	0.112279	0.0680728	-0.0097608	-0.126603	-0.233039	-0.318258	-0.326496	-0.286571	-0.21935	-0.144582	-0.0438773	0.0149189
0.183719	0.0257792	-0.156644	-0.305431	-0.37647	-0.454702	-0.529145	-0.560819	-0.562119	-0.467562	-0.328966	-0.173805	0.0375801	0.245496	0.477358	0.646846	0.586366	0.394446	0.180876	0.02081	-0.0330372	-0.018191	-0.0238731	0.0212727	0.102956	0.238455	0.379723	0.423491	0.407148	0.400929	0.421444	0.468343	0.469915	0.374885	0.22902	0.124805	0.0637541	0.0589447	0.0439038	0.0399511	0.00926231	-0.0898612	-0.229946	-0.371328	-0.488725	-0.611392	-0.682213	-0.68103	-0.545294	-0.358327
0.846143	0.742757	0.597851	0.422677	0.226166	0.016341	-0.181954	-0.35826	-0.540974	-0.711389	-0.830646	-0.884133	-0.860966	-0.815517	-0.809037	-0.88797	-1.05191	-1.28198	-1.53801	-1.79955	-2.03309	-2.20253	-2.30356	-2.31503	-2.27191	-2.21132	-2.19648	-2.2587	-2.38303	-2.52856	-2.65919	-2.77685	-2.89175	-3.04667	-3.25253	-3.49651	-3.73049	-3.93135	-4.06232	-4.12461	-4.09943	-3.99575	-3.82059	-3.60556	-3.3618	-3.1061	-2.85181	-2.60939	-2.40672	-2.26442
0.570835	0.606186	0.61223	0.54588	0.370055	0.122386	-0.117577	-0.251037	-0.25362	-0.141846	0.00297154	0.146829	0.27396	0.402247	0.520041	0.565835	0.499495	0.312421	0.0810195	-0.121784	-0.243092	-0.301075	-0.364761	-0.493409	-0.666109	-0.792388	-0.846268	-0.822033	-0.760621	-0.683065	-0.581469	-0.449232	-0.313521	-0.214927	-0.178928	-0.212842	-0.29144	-0.419017	-0.617826	-0.90798	-1.28841	-1.71674	-2.14174	-2.53079	-2.87528	-3.18932	-3.48375	-3.71951	-3.83331	-3.77352
0.521381	0.403269	0.305156	0.227813	0.151552	0.086473	0.0426845	0.0985441	0.160283	0.205053	0.219495	0.214063	0.179072	0.150367	0.132725	0.174997	0.24424	0.284613	0.22584	0.110626	0.0346843	-0.000890048	0.0066146	-0.0291754	-0.0669168	-0.1113	-0.134562	-0.1045	-0.00187352	0.118561	0.308121	0.516458	0.731078	0.911535	0.945244	0.737216	0.418217	0.112453	-0.0155916	0.0231801	0.170682	0.294038	0.382952	0.437765	0.437184	0.42599	0.362659	0.306239	0.253168	0.246628
-0.240249	-0.280047	-0.345624	-0.445914	-0.571027	-0.710569	-0.824522	-0.845232	-0.840547	-0.767643	-0.62525	-0.406738	-0.228488	-0.159947	-0.226386	-0.414024	-0.648701	-0.811549	-0.831235	-0.702585	-0.449924	-0.114354	0.17837	0.371811	0.411638	0.292579	0.091556	-0.0818469	-0.124357	-0.0332227	0.151918	0.32753	0.376203	0.318208	0.181655	0.0208312	-0.18244	-0.305399	-0.390889	-0.353053	-0.232103	-0.0785023	0.0438636	0.125906	0.141887	0.0935519	0.00284631	-0.0929979	-0.163648	-0.237822
-0.168783	-0.238419	-0.336773	-0.431023	-0.496419	-0.458027	-0.390498	-0.235132	-0.0407298	0.108038	0.209007	0.229525	0.185912	0.0902219	0.0204467	0.0540706	0.190445	0.347831	0.437303	0.44288	0.432479	0.403423	0.389402	0.392065	0.336825	0.231125	0.128612	0.0907119	0.117764	0.202658	0.284829	0.299799	0.181236	-0.0175349	-0.19399	-0.293114	-0.281358	-0.179723	-0.0773846	-0.0413283	-0.0904596	-0.204049	-0.272847	-0.326768	-0.391598	-0.454264	-0.518063	-0.567395	-0.52358	-0.445291
-0.127107	0.00498802	0.14484	0.240211	0.265866	0.241209	0.160976	0.0655725	-0.00956512	-0.0467726	-0.0766684	-0.0968523	-0.0687744	0.0298951	0.158746	0.23245	0.215009	0.0448937	-0.142995	-0.272414	-0.311371	-0.295158	-0.276362	-0.252077	-0.244826	-0.222125	-0.212381	-0.187593	-0.229267	-0.290118	-0.329119	-0.333898	-0.28224	-0.21817	-0.17243	-0.268862	-0.388994	-0.554915	-0.656672	-0.658888	-0.567634	-0.455013	-0.338613	-0.282976	-0.327162	-0.380053	-0.440307	-0.455958	-0.399784	-0.27232
0.465667	0.33146	0.149308	-0.0438846	-0.16901	-0.308146	-0.457193	-0.549475	-0.576929	-0.501775	-0.318266	-0.114641	0.0805145	0.181498	0.194438	0.185085	0.214724	0.341055	0.477754	0.565846	0.617641	0.684041	0.713503	0.711336	0.67746	0.640152	0.643803	0.760744	0.908814	1.05246	1.01063	0.796171	0.516544	0.247451	0.0896175	0.0244528	0.0312733	0.0113153	-0.0319903	-0.0923357	-0.0817914	-0.071206	-0.0180469	0.0476457	0.0881984	0.117361	0.106452	0.1435	0.286099	0.5317
-0.660138	-0.337807	-0.0725759	0.079125	0.0852038	-0.0253094	-0.146245	-0.293028	-0.446704	-0.60646	-0.72417	-0.705268	-0.57685	-0.439642	-0.30205	-0.141971	0.0724005	0.25876	0.301694	0.204932	-0.0262409	-0.187245	-0.21477	-0.0928506	0.134913	0.266996	0.273326	0.15207	0.060046	0.102146	0.25248	0.373931	0.429204	0.406627	0.378426	0.378122	0.32739	0.249703	0.189221	0.194587	0.237997	0.29066	0.277756	0.249568	0.240526	0.352994	0.55395	0.716083	0.767057	0.755984
0.331769	0.392598	0.302578	0.107109	-0.103674	-0.295281	-0.366594	-0.351879	-0.321097	-0.334075	-0.405729	-0.444116	-0.385629	-0.220929	-0.0375982	0.149696	0.248534	0.25796	0.153958	-0.0870206	-0.39001	-0.715452	-0.92373	-0.950922	-0.813773	-0.543715	-0.252947	-0.0764065	-0.0788224	-0.175073	-0.240303	-0.213166	-0.110607	0.000514174	0.0749996	0.127637	0.129143	0.106732	0.0354723	-0.0583833	-0.207285	-0.371859	-0.549557	-0.681009	-0.788425	-0.880843	-0.872611	-0.744199	-0.500046	-0.168041
-0.201728	-0.107566	-0.108249	-0.140746	-0.187388	-0.236565	-0.306248	-0.435278	-0.516048	-0.487202	-0.324916	-0.0886862	0.0689018	0.0323428	-0.181793	-0.446981	-0.670332	-0.725326	-0.644879	-0.482401	-0.312596	-0.195014	-0.155541	-0.192749	-0.291491	-0.396829	-0.436779	-0.31348	-0.103364	0.178729	0.449925	0.641996	0.724669	0.746962	0.747555	0.710113	0.6451	0.535364	0.417374	0.35725	0.384875	0.397077	0.311459	0.212065	0.0383143	-0.0833477	-0.06619	0.0783213	0.398801	0.721758
-0.576771	-0.329009	-0.0807967	0.0615755	0.0105753	-0.192639	-0.494851	-0.741521	-0.843299	-0.846526	-0.743177	-0.655071	-0.613303	-0.628931	-0.672452	-0.670542	-0.60389	-0.505844	-0.398903	-0.348317	-0.371151	-0.395869	-0.393138	-0.322302	-0.353187	-0.525394	-0.793933	-0.984668	-1.05055	-0.97772	-0.761384	-0.481866	-0.263805	-0.153538	-0.181494	-0.292164	-0.367501	-0.398214	-0.364836	-0.278485	-0.185219	-0.0699442	0.0707783	0.183272	0.253481	0.293348	0.259237	0.198341	0.0911639	-0.0271388
0.497978	0.300242	0.145616	0.0186069	-0.0767755	-0.187702	-0.260426	-0.287386	-0.228598	-0.172053	-0.109465	-0.0277802	0.0317747	0.0786359	0.0965732	0.167988	0.30764	0.479394	0.618392	0.678554	0.682976	0.616344	0.552051	0.479285	0.440484	0.456664	0.532401	0.612124	0.670315	0.68954	0.654759	0.601234	0.577194	0.646142	0.755867	0.872078	0.948573	0.957038	0.881989	0.740481	0.589932	0.463945	0.474909	0.603906	0.766861	0.825479	0.753981	0.60491	0.455459	0.334459
-0.0604887	0.0219024	0.102735	0.123187	0.12223	0.141027	0.231636	0.323444	0.415294	0.433643	0.329502	0.0903122	-0.174091	-0.429098	-0.608529	-0.641333	-0.537391	-0.290303	-0.0556542	0.0388704	-0.0484047	-0.266169	-0.404267	-0.335254	-0.0865441	0.25335	0.551021	0.664326	0.615456	0.447514	0.249435	0.17587	0.200154	0.254883	0.309901	0.252872	0.123633	0.00427975	-0.158445	-0.269406	-0.332382	-0.298397	-0.256112	-0.25255	-0.246542	-0.160136	-0.00353364	0.211869	0.483228	0.64932
0.345404	0.201327	0.145259	0.24962	0.47775	0.768793	1.00791	1.0908	0.946934	0.684554	0.460413	0.367741	0.375699	0.390558	0.380401	0.32739	0.289632	0.2172	0.140287	0.0579379	-0.0106915	0.0360925	0.170051	0.335295	0.453263	0.473153	0.439504	0.373627	0.314025	0.313157	0.273163	0.264571	0.20548	0.098994	-0.0404622	-0.133155	-0.177585	-0.0832565	0.0558549	0.198557	0.283738	0.2848	0.276583	0.298991	0.43311	0.610992	0.708887	0.705703	0.63832	0.553964
-0.0551741	-0.18016	-0.296298	-0.388279	-0.389295	-0.254961	-0.0604859	0.0803059	0.106532	0.021442	-0.114039	-0.163675	-0.0881512	0.0648958	0.155269	0.187415	0.126946	0.00799796	-0.119156	-0.215672	-0.219389	-0.0895576	0.106848	0.313294	0.396057	0.41056	0.299865	0.121783	-0.0758184	-0.290354	-0.437096	-0.497634	-0.391858	-0.176097	0.126217	0.383663	0.61483	0.789043	0.887888	0.983584	1.00661	0.966587	0.836592	0.657241	0.449051	0.285886	0.181482	0.144314	0.207133	0.236607
1.34678	1.04134	0.78848	0.601002	0.437511	0.202668	-0.0410102	-0.198065	-0.23367	-0.127009	0.0709848	0.259828	0.349647	0.382002	0.381954	0.367483	0.300579	0.157323	-0.0286442	-0.165025	-0.205612	-0.0951713	0.057442	0.153854	0.22773	0.283465	0.407469	0.537817	0.678025	0.752124	0.757194	0.646047	0.502892	0.361597	0.334013	0.410044	0.494281	0.594941	0.616122	0.633994	0.633857	0.591214	0.523515	0.447518	0.336597	0.198213	-0.00289798	-0.21098	-0.371547	-0.406516
0.345082	0.0636713	-0.120037	-0.235381	-0.304625	-0.404209	-0.54285	-0.635247	-0.648212	-0.511406	-0.233498	0.101254	0.390258	0.610861	0.707862	0.634249	0.439678	0.225003	0.0121772	-0.165506	-0.331676	-0.426803	-0.408346	-0.247706	-0.0285049	0.240565	0.513241	0.724806	0.8228	0.76304	0.610426	0.440532	0.317835	0.349288	0.542974	0.78779	0.924222	0.904357	0.738622	0.536621	0.401033	0.380793	0.454474	0.502348	0.440164	0.204222	-0.158838	-0.48245	-0.680925	-0.727456
-1.22336	-0.843919	-0.472536	-0.0967545	0.216387	0.480797	0.682428	0.828749	0.952782	0.991742	1.03788	1.04409	1.01585	0.93168	0.793044	0.640051	0.48484	0.349002	0.280502	0.347752	0.483452	0.688163	0.83082	0.879485	0.790103	0.597613	0.422638	0.337338	0.402028	0.535595	0.778396	1.07963	1.38311	1.65675	1.81437	1.82233	1.71017	1.49054	1.26222	1.09986	1.0588	1.14102	1.24767	1.28617	1.26989	1.11947	0.876387	0.661863	0.50858	0.462538
-0.589307	-0.578298	-0.479705	-0.299359	-0.0601455	0.193456	0.385231	0.498748	0.503783	0.40679	0.267016	0.18084	0.203245	0.288007	0.441418	0.57987	0.69435	0.824967	0.986707	1.13943	1.27	1.33361	1.39406	1.4209	1.46756	1.54797	1.62562	1.68756	1.7364	1.73003	1.67305	1.60333	1.52437	1.52878	1.62083	1.68055	1.70458	1.63346	1.50077	1.34101	1.17704	1.08358	1.0315	1.04852	1.1156	1.22191	1.28523	1.31589	1.2916	1.23433
-0.304475	-0.142014	0.0135411	0.160506	0.203222	0.141463	0.0541287	0.0155413	0.0911782	0.214741	0.340296	0.411589	0.399431	0.304741	0.169497	0.0626661	0.0341152	0.122496	0.326396	0.562888	0.754125	0.806523	0.702458	0.505526	0.345422	0.260765	0.266004	0.33949	0.462019	0.611071	0.727272	0.824758	0.889069	0.861847	0.727043	0.542548	0.353756	0.211703	0.1224	0.0717759	0.0468421	0.02617	0.00274625	-0.0750133	-0.175029	-0.272391	-0.363216	-0.41597	-0.435349	-0.462709
-0.0595748	-0.112493	-0.20335	-0.361005	-0.498402	-0.55648	-0.510509	-0.33894	-0.1081	0.103104	0.246467	0.281987	0.205187	0.0957976	0.0186975	0.0203897	0.0867419	0.130862	0.125745	0.0447229	-0.0253273	-0.0240721	0.048788	0.110133	0.0993089	0.0594582	-0.0211185	-0.140531	-0.273579	-0.401173	-0.550033	-0.696029	-0.796145	-0.846611	-0.83494	-0.820197	-0.792552	-0.771535	-0.728691	-0.650126	-0.577832	-0.501662	-0.45453	-0.425658	-0.456158	-0.462303	-0.423788	-0.310497	-0.192446	-0.104044
0.338821	0.148557	-0.00505521	-0.0959245	-0.126683	-0.115201	-0.123671	-0.107918	-0.0995791	-0.0496945	-0.00167964	0.0980447	0.201228	0.313504	0.482384	0.748409	1.08561	1.4566	1.71857	1.79281	1.65726	1.47687	1.3203	1.30024	1.44314	1.65754	1.82527	1.94721	1.99683	1.98012	1.92819	1.84803	1.80369	1.81659	1.90453	2.00346	2.02034	1.88492	1.76375	1.73566	1.92846	2.22095	2.49252	2.60414	2.51589	2.3243	2.11392	2.06653	2.16954	2.3842
0.338821	0.148557	-0.00505521	-0.0959245	-0.126683	-0.115201	-0.123671	-0.107918	-0.0995791	-0.0496945	-0.00167964	0.0980447	0.201228	0.313504	0.482384	0.748409	1.08561	1.4566	1.71857	1.79281	1.65726	1.47687	1.3203	1.30024	1.44314	1.65754	1.82527	1.94721	1.99683	1.98012	1.92819	1.84803	1.80369	1.81659	1.90453	2.00346	2.02034	1.88492	1.76375	1.73566	1.92846	2.22095	2.49252	2.60414	2.51589	2.3243	2.11392	2.06653	2.16954	2.3842
1.09584	1.17428	1.24106	1.23796	1.06118	0.692008	0.219937	-0.230537	-0.507814	-0.581832	-0.569074	-0.547353	-0.538494	-0.538217	-0.48505	-0.307535	-0.0572062	0.172179	0.284848	0.277158	0.155969	0.054476	0.0674689	0.197865	0.411733	0.601947	0.723538	0.812717	0.887792	0.965271	1.00709	0.990554	0.959665	0.954975	0.990983	1.10476	1.22728	1.33676	1.42195	1.46984	1.50291	1.46036	1.39625	1.32254	1.29615	1.29261	1.28283	1.24404	1.16133	1.10848
0.0815727	0.120644	0.280306	0.552293	0.904456	1.2334	1.44048	1.43253	1.29957	1.05162	0.880975	0.800984	0.854425	1.01979	1.29978	1.56042	1.75197	1.76848	1.58526	1.33555	1.10492	0.914663	0.778401	0.709739	0.782535	0.933495	1.03488	1.02248	0.86768	0.646272	0.500112	0.530641	0.691797	0.912475	1.11516	1.26019	1.28504	1.18921	1.02547	0.920168	0.889273	0.971877	1.18645	1.37086	1.39968	1.30415	1.1299	0.924041	0.778685	0.722367
0.410057	0.496312	0.588867	0.697111	0.730808	0.70579	0.532696	0.327006	0.18505	0.186032	0.237567	0.345605	0.49913	0.68854	0.927115	1.11182	1.23513	1.20318	1.04575	0.869943	0.696013	0.544264	0.434737	0.409278	0.378419	0.343674	0.250565	0.115466	-0.0265717	-0.126497	-0.137482	-0.086854	0.0289482	0.172304	0.31182	0.313239	0.177909	-0.0149542	-0.0687874	0.0675321	0.312828	0.444907	0.3937	0.115258	-0.212789	-0.458282	-0.501497	-0.319709	0.0305334	0.407018
0.749172	0.736025	0.665038	0.564934	0.423601	0.308844	0.224893	0.306243	0.511154	0.781603	1.0611	1.27778	1.44481	1.4842	1.46615	1.47922	1.59563	1.81309	2.11208	2.39156	2.5443	2.58084	2.63723	2.67951	2.64427	2.51616	2.23853	1.95113	1.76106	1.70106	1.76146	1.87266	1.92723	1.92892	1.94779	2.01856	2.16709	2.33458	2.47418	2.54832	2.54412	2.45128	2.28729	2.13956	1.96354	1.84159	1.76948	1.70477	1.64168	1.59717
-0.103547	-0.0542247	0.072665	0.287269	0.436755	0.461553	0.339015	0.123446	-0.0885103	-0.316804	-0.525674	-0.710832	-0.823933	-0.757056	-0.50174	-0.113132	0.320534	0.729863	1.06832	1.28577	1.3768	1.35378	1.25891	1.08779	0.930836	0.821045	0.776688	0.76434	0.797398	0.909208	1.07973	1.23503	1.35519	1.38947	1.39829	1.37562	1.39227	1.36329	1.34021	1.35651	1.4471	1.52861	1.58156	1.54992	1.42712	1.26808	1.14494	1.11144	1.13805	1.2634
1.05725	1.05787	0.997205	0.831178	0.59876	0.31675	0.100897	-0.0429281	-0.00455725	0.10933	0.234747	0.30957	0.276715	0.184166	0.11092	0.0869057	0.0661009	0.0102804	-0.101035	-0.18493	-0.27175	-0.317759	-0.30746	-0.248014	-0.185205	-0.188571	-0.274008	-0.44304	-0.626502	-0.743118	-0.746565	-0.639067	-0.477978	-0.390959	-0.40979	-0.538458	-0.753208	-0.950587	-1.05331	-1.04433	-0.907142	-0.718126	-0.498039	-0.319285	-0.300083	-0.34497	-0.487635	-0.633197	-0.776078	-0.909976
-0.308382	-0.4355	-0.576702	-0.688936	-0.786502	-0.858055	-0.872394	-0.87599	-0.804164	-0.668143	-0.479876	-0.306775	-0.246835	-0.271664	-0.279291	-0.201216	-0.0480695	0.201743	0.401845	0.486655	0.512886	0.525691	0.579087	0.647607	0.729959	0.825406	0.877408	0.802106	0.633593	0.504679	0.475443	0.583954	0.737763	0.86381	0.948348	1.02858	1.12543	1.25648	1.39592	1.41134	1.30809	1.12963	0.989832	0.952209	1.01733	1.11135	1.18263	1.21185	1.15145	1.02914
1.39459	1.44327	1.50745	1.57145	1.65542	1.7271	1.79757	1.83085	1.82584	1.78008	1.71239	1.65075	1.60407	1.56289	1.50537	1.46267	1.43112	1.42022	1.42312	1.43135	1.45458	1.49403	1.58108	1.72685	1.92916	2.1582	2.41206	2.65291	2.86734	3.03684	3.13343	3.16507	3.14777	3.10694	3.05691	3.04014	3.06677	3.12489	3.18663	3.22462	3.20338	3.11049	2.94546	2.74312	2.54642	2.3916	2.28669	2.24432	2.25201	2.29148
2.50627	2.5296	2.54446	2.53997	2.52319	2.50212	2.50682	2.53865	2.5815	2.63297	2.66703	2.68512	2.67168	2.68005	2.7258	2.81495	2.90336	2.9987	3.06217	3.104	3.10813	3.05385	2.97731	2.9161	2.92095	2.99479	3.06037	3.06329	2.99192	2.83519	2.66233	2.51943	2.44149	2.41025	2.36474	2.28509	2.11761	1.88117	1.61797	1.33746	1.05714	0.804549	0.622657	0.525524	0.535764	0.622061	0.765124	0.901067	1.03572	1.15437
1.04209	1.05295	1.06005	1.06344	1.06531	1.06447	1.06353	1.05595	1.0578	1.0705	1.0901	1.11257	1.12421	1.12782	1.112	1.07653	1.01686	0.945793	0.888087	0.841477	0.813537	0.806246	0.836637	0.911796	1.04243	1.22263	1.42968	1.61648	1.75841	1.83704	1.84367	1.78114	1.65988	1.49339	1.29039	1.08329	0.899482	0.752039	0.638498	0.547793	0.45362	0.355803	0.241871	0.134327	0.0332371	-0.039196	-0.0635282	-0.0534764	-0.0387826	-0.0468192
0.659502	0.713143	0.743466	0.73953	0.698871	0.642343	0.611487	0.599067	0.624193	0.654103	0.697781	0.709435	0.656726	0.544747	0.388689	0.219074	0.166789	0.260074	0.503564	0.791016	1.02637	1.17375	1.24816	1.28727	1.38123	1.55013	1.70411	1.76353	1.6754	1.5043	1.2863	1.08733	0.9048	0.694298	0.390871	0.00665428	-0.448497	-0.912368	-1.32497	-1.68379	-1.98503	-2.2338	-2.42728	-2.56969	-2.63384	-2.59532	-2.4458	-2.18024	-1.84665	-1.51502
-1.50068	-1.51926	-1.53378	-1.52549	-1.45022	-1.29565	-1.07216	-0.82634	-0.60647	-0.42393	-0.289391	-0.194755	-0.130142	-0.0897066	-0.0796448	-0.0806369	-0.0827158	-0.0627399	-0.00517239	0.0825388	0.193253	0.312635	0.416978	0.495421	0.53213	0.541431	0.520964	0.481674	0.43248	0.379635	0.320451	0.259465	0.202614	0.152073	0.0870084	0.00593383	-0.0964513	-0.220706	-0.359458	-0.497818	-0.616029	-0.719777	-0.832673	-0.969011	-1.12392	-1.27989	-1.42277	-1.55957	-1.69372	-1.82963
-2.94645	-2.87174	-2.71536	-2.49097	-2.20087	-1.88866	-1.57813	-1.27313	-0.992357	-0.738427	-0.510025	-0.329767	-0.2072	-0.115225	-0.0414821	0.0373973	0.126779	0.203616	0.272643	0.322629	0.372785	0.425263	0.49011	0.572994	0.688774	0.803007	0.873619	0.87	0.796394	0.678871	0.521389	0.356264	0.188768	0.0306793	-0.115665	-0.233985	-0.325488	-0.414402	-0.51281	-0.62908	-0.735617	-0.827466	-0.887803	-0.918407	-0.912394	-0.863486	-0.761202	-0.625565	-0.482659	-0.367372
-2.29996	-2.24116	-2.16514	-2.08056	-2.01657	-1.9585	-1.93815	-1.97077	-2.05533	-2.15659	-2.25786	-2.31384	-2.28315	-2.12903	-1.81237	-1.36697	-0.847593	-0.345797	0.0587807	0.361646	0.56734	0.723566	0.85289	0.967316	1.09426	1.23841	1.35418	1.43607	1.49737	1.57205	1.69922	1.8511	1.95498	1.93093	1.76896	1.54315	1.316	1.11957	0.960184	0.834586	0.760305	0.740602	0.782564	0.885267	1.00036	1.09287	1.15551	1.24772	1.41443	1.64089
-1.32314	-1.2715	-1.23358	-1.18543	-1.1423	-1.13603	-1.18208	-1.24583	-1.23292	-1.11084	-0.831825	-0.509775	-0.307147	-0.277034	-0.355179	-0.401265	-0.340568	-0.12984	0.179663	0.56269	0.956128	1.3643	1.76531	2.11384	2.37535	2.58453	2.75386	2.92375	3.12328	3.37702	3.70536	4.08322	4.37516	4.51301	4.40208	4.09791	3.67608	3.20964	2.81293	2.44546	2.14772	1.905	1.67495	1.44316	1.23341	1.05547	0.949036	0.934569	0.970233	1.02007
-0.129653	-0.139502	-0.165196	-0.211468	-0.274443	-0.315156	-0.301044	-0.209294	-0.0919926	0.0202357	0.0688719	0.0110361	-0.121453	-0.303618	-0.46449	-0.560461	-0.574428	-0.50066	-0.35084	-0.157187	0.0411912	0.206471	0.324442	0.412076	0.493596	0.584577	0.720533	0.90562	1.11937	1.33636	1.51858	1.60279	1.57107	1.44283	1.27026	1.07652	0.843011	0.547573	0.201439	-0.170384	-0.516808	-0.786292	-0.943901	-1.00286	-0.990056	-0.916755	-0.787749	-0.624947	-0.436202	-0.260076
-0.544953	-0.506746	-0.490816	-0.489915	-0.506119	-0.530519	-0.551915	-0.572246	-0.568024	-0.545726	-0.524906	-0.518673	-0.528833	-0.540875	-0.525805	-0.480932	-0.401198	-0.304977	-0.226903	-0.171491	-0.12781	-0.0937792	-0.0309587	0.0891453	0.275127	0.50333	0.719817	0.858947	0.881346	0.791404	0.640329	0.486299	0.362636	0.251166	0.121808	-0.047181	-0.223283	-0.39452	-0.539908	-0.651068	-0.71956	-0.787246	-0.864056	-0.936145	-0.999375	-1.04026	-1.05529	-1.04356	-1.02071	-0.999041
-0.923378	-1.03611	-1.14568	-1.21913	-1.24332	-1.2056	-1.16189	-1.12569	-1.10315	-1.1103	-1.12089	-1.13056	-1.1202	-1.0843	-0.994895	-0.864042	-0.693004	-0.499147	-0.29927	-0.112065	0.0568637	0.20314	0.312172	0.379914	0.403347	0.463323	0.5759	0.753379	0.951587	1.10697	1.20198	1.21407	1.14934	1.03062	0.866144	0.671276	0.428446	0.142166	-0.18434	-0.556643	-0.96047	-1.34056	-1.6492	-1.86516	-1.99292	-2.0725	-2.12998	-2.17315	-2.17298	-2.14043
-0.785809	-0.611339	-0.387057	-0.149584	0.0431292	0.172332	0.215825	0.190508	0.102501	-0.000645794	-0.0671088	-0.0997018	-0.11133	-0.130819	-0.134801	-0.160018	-0.19771	-0.234072	-0.204502	-0.0815091	0.0864408	0.29661	0.512697	0.719516	0.910088	1.1103	1.30426	1.49018	1.67133	1.82731	1.92016	1.86564	1.68613	1.41526	1.12888	0.863904	0.635578	0.369372	0.0237834	-0.450177	-0.952594	-1.40425	-1.70035	-1.83479	-1.80683	-1.65478	-1.44794	-1.22922	-1.03119	-0.854352
-0.512439	-0.364265	-0.176564	0.043199	0.267986	0.468272	0.630386	0.768523	0.903406	1.04762	1.1846	1.31481	1.42993	1.53645	1.61389	1.66589	1.7101	1.76496	1.851	1.96064	2.09628	2.22897	2.33188	2.40678	2.44837	2.43216	2.34327	2.18872	2.00033	1.82567	1.68532	1.60589	1.57539	1.55562	1.52181	1.45774	1.36809	1.263	1.14243	1.02174	0.895705	0.770555	0.655957	0.572462	0.530674	0.520169	0.550635	0.623779	0.751636	0.899046
-1.96326	-1.86065	-1.74618	-1.62716	-1.50238	-1.34283	-1.12931	-0.873308	-0.588958	-0.292429	0.000499792	0.290359	0.552906	0.751425	0.873059	0.92586	0.960238	1.01572	1.11706	1.2524	1.4005	1.53573	1.65094	1.75252	1.8379	1.93029	2.01826	2.10235	2.17687	2.22428	2.22039	2.16985	2.10082	2.00606	1.89917	1.7721	1.61434	1.43979	1.28233	1.15275	1.06252	1.00877	0.98461	0.987706	1.0087	1.02983	1.02499	1.00005	0.956389	0.924236
-0.841991	-0.76354	-0.678348	-0.606149	-0.554464	-0.50513	-0.460319	-0.395915	-0.317419	-0.241984	-0.191058	-0.18359	-0.215393	-0.250371	-0.26938	-0.270919	-0.260215	-0.2434	-0.212129	-0.161599	-0.0817774	0.0356263	0.174004	0.341774	0.519316	0.699237	0.903217	1.13858	1.37979	1.59214	1.75805	1.85951	1.86586	1.77283	1.63415	1.47537	1.30866	1.12774	0.902092	0.633341	0.324189	-0.0114073	-0.321627	-0.594851	-0.827081	-1.0237	-1.19295	-1.33054	-1.46361	-1.60399
0.763508	0.810501	0.822035	0.798673	0.728761	0.646309	0.582693	0.579341	0.611204	0.661739	0.685296	0.659507	0.579796	0.455729	0.342908	0.291162	0.314632	0.391747	0.500444	0.611531	0.71479	0.81356	0.893138	0.974185	1.07134	1.19994	1.37097	1.57443	1.79885	2.02765	2.23422	2.36444	2.42987	2.402	2.29396	2.11603	1.89154	1.63277	1.33406	1.01668	0.703039	0.424569	0.197936	0.00679565	-0.156056	-0.264072	-0.336906	-0.368031	-0.349741	-0.268984
0.185815	0.136793	0.0804454	0.00682126	-0.0654106	-0.170503	-0.307188	-0.472098	-0.620021	-0.721479	-0.740973	-0.750694	-0.789663	-0.886133	-0.998536	-1.06093	-1.06378	-1.01223	-0.904081	-0.753963	-0.598477	-0.478703	-0.415356	-0.408839	-0.381669	-0.27866	-0.0538375	0.266962	0.616177	0.934691	1.17756	1.32993	1.39051	1.36824	1.2694	1.1208	0.937742	0.744051	0.525176	0.274041	-0.00825644	-0.299596	-0.541815	-0.709789	-0.772497	-0.760193	-0.722621	-0.689434	-0.696526	-0.767341
-0.329377	-0.314886	-0.268679	-0.183187	-0.0835272	-0.0332962	-0.0438721	-0.100145	-0.165947	-0.224222	-0.269351	-0.292073	-0.290204	-0.242127	-0.142761	0.00693148	0.190619	0.423174	0.675362	0.943036	1.24455	1.54424	1.83246	2.04214	2.1371	2.05949	1.80521	1.39933	0.946153	0.519636	0.147265	-0.139666	-0.361584	-0.483989	-0.535289	-0.566216	-0.643849	-0.784869	-1.00553	-1.26378	-1.5524	-1.86849	-2.17407	-2.44948	-2.62906	-2.72053	-2.77653	-2.81407	-2.83731	-2.79208
1.41193	1.37055	1.29595	1.19583	1.07133	0.929558	0.804426	0.722286	0.694001	0.702684	0.735694	0.780693	0.815046	0.835664	0.852533	0.904246	1.02272	1.19897	1.40849	1.59982	1.73034	1.77795	1.77065	1.7549	1.78042	1.86983	2.01575	2.18389	2.3344	2.441	2.50007	2.56136	2.64229	2.75726	2.85261	2.86391	2.76613	2.606	2.44636	2.34553	2.32019	2.32873	2.32254	2.25897	2.13946	1.99293	1.83505	1.69163	1.5654	1.47059
-0.996888	-0.897167	-0.859733	-0.914439	-1.02484	-1.12663	-1.14625	-0.943913	-0.517346	0.0960673	0.75997	1.32164	1.75124	2.03218	2.22122	2.3629	2.52737	2.68303	2.86742	3.06484	3.31059	3.59777	3.89306	4.13281	4.19867	3.99324	3.49345	2.73441	1.9052	1.13955	0.549617	0.178392	-0.00290171	-0.0881629	-0.189292	-0.365164	-0.614017	-0.851165	-1.08195	-1.2931	-1.48705	-1.66321	-1.80612	-1.92923	-2.0219	-2.07922	-2.0792	-1.99295	-1.8027	-1.4907
-0.158499	0.00284646	0.206596	0.434596	0.599291	0.622036	0.494941	0.254048	0.038112	-0.0921424	-0.0988525	0.0355131	0.268546	0.584394	0.938153	1.31912	1.70292	2.07195	2.34969	2.51456	2.59905	2.67211	2.7891	2.96598	3.17595	3.37873	3.50102	3.5094	3.39073	3.17971	2.84981	2.39988	1.81862	1.11143	0.333874	-0.367512	-0.918989	-1.29741	-1.54895	-1.77681	-2.02148	-2.30536	-2.60423	-2.81389	-2.86731	-2.68174	-2.26191	-1.73323	-1.23538	-0.851832
-0.214073	-0.21183	-0.189179	-0.111369	0.0183618	0.187823	0.346302	0.478112	0.536106	0.538623	0.511392	0.472628	0.428487	0.338845	0.211588	0.0449543	-0.109206	-0.218641	-0.2675	-0.229572	-0.0887375	0.117021	0.33569	0.490876	0.527857	0.461772	0.390162	0.417581	0.615476	0.994793	1.42927	1.84177	2.1251	2.25332	2.2449	2.11597	1.85831	1.5303	1.16193	0.773027	0.382017	0.0170233	-0.289803	-0.517686	-0.670372	-0.771202	-0.861232	-0.984494	-1.12916	-1.23868
-0.941441	-0.842911	-0.744904	-0.655621	-0.601511	-0.595784	-0.622336	-0.631951	-0.594536	-0.492726	-0.362619	-0.206903	-0.0308245	0.142788	0.253879	0.286438	0.257901	0.205654	0.192833	0.253098	0.401412	0.611409	0.81676	1.00565	1.1634	1.2915	1.4146	1.56785	1.75924	1.94544	2.05351	2.0243	1.84351	1.53978	1.17685	0.790799	0.395128	-0.0127799	-0.445989	-0.870672	-1.24177	-1.51543	-1.67714	-1.76278	-1.79045	-1.7688	-1.70144	-1.57174	-1.37123	-1.11719
0.31194	0.292026	0.267862	0.248155	0.267513	0.300035	0.312476	0.263558	0.173834	0.12258	0.158043	0.287588	0.476902	0.682747	0.857291	0.985383	1.05721	1.11822	1.23655	1.47596	1.81398	2.207	2.56421	2.82447	2.91654	2.83091	2.59502	2.25268	1.84439	1.38994	0.943038	0.532542	0.20324	-0.029232	-0.169289	-0.244267	-0.282329	-0.325805	-0.367255	-0.411971	-0.443291	-0.394012	-0.302954	-0.194644	-0.0689018	0.0347044	0.0851358	0.089647	0.0836882	0.102252
1.6316	1.66578	1.71157	1.75828	1.79534	1.80114	1.75635	1.65996	1.54258	1.43865	1.37561	1.35286	1.36301	1.39223	1.43063	1.48143	1.54976	1.63062	1.71238	1.77775	1.81653	1.82555	1.8009	1.74559	1.66736	1.58749	1.53325	1.53374	1.58605	1.67061	1.74494	1.77539	1.74366	1.66563	1.57416	1.49339	1.43865	1.40944	1.40472	1.41399	1.44366	1.49546	1.5794	1.69305	1.82423	1.95433	2.05497	2.11301	2.12104	2.09067
0.796722	0.752714	0.684872	0.600974	0.516614	0.444884	0.395585	0.369285	0.365031	0.373382	0.400095	0.446745	0.522343	0.624682	0.742818	0.859978	0.950606	1.00288	1.01011	0.98276	0.941001	0.904549	0.879051	0.862029	0.849974	0.840009	0.838449	0.840469	0.845716	0.848707	0.843491	0.818334	0.767699	0.68977	0.60255	0.525242	0.466255	0.427475	0.406049	0.407648	0.434638	0.497437	0.602298	0.748679	0.917352	1.08688	1.23336	1.33883	1.40394	1.43656
-0.323313	-0.341673	-0.311063	-0.259509	-0.143381	-0.000524172	0.129745	0.2794	0.398554	0.456374	0.477683	0.412733	0.304093	0.231953	0.194714	0.232072	0.291658	0.365069	0.43955	0.457027	0.377491	0.265129	0.155886	0.0913127	0.0972423	0.164679	0.223642	0.237043	0.181393	0.129348	0.148283	0.231282	0.41737	0.544636	0.626918	0.627495	0.628592	0.661984	0.713106	0.768229	0.864603	0.98146	1.10994	1.21174	1.27374	1.29625	1.2427	1.11668	0.97652	0.864857
0.899016	0.666741	0.400749	0.121884	-0.0663228	-0.150104	-0.0762184	0.0944337	0.255002	0.293225	0.249871	0.218324	0.21216	0.317469	0.360987	0.410506	0.41726	0.398585	0.336338	0.304436	0.293205	0.294118	0.336836	0.352931	0.379563	0.365699	0.429988	0.584355	0.862127	1.14612	1.35622	1.36832	1.30216	1.24021	1.22879	1.29779	1.43495	1.55437	1.65381	1.68483	1.62042	1.4403	1.21921	1.07881	1.06077	1.13271	1.21198	1.26758	1.30656	1.3567
0.139143	0.0383502	-0.0941747	-0.266253	-0.406367	-0.486537	-0.48057	-0.434602	-0.36478	-0.308748	-0.253942	-0.238279	-0.170653	-0.0783135	-0.0485788	-0.138092	-0.259821	-0.310214	-0.253189	-0.130778	0.0153116	0.123298	0.127968	0.0396982	-0.00889264	0.0472032	0.200557	0.371002	0.528136	0.583251	0.558271	0.470676	0.357523	0.318003	0.397546	0.591957	0.825164	1.04322	1.11326	1.02218	0.824936	0.65465	0.612399	0.716572	0.876504	0.977744	0.929447	0.797951	0.660888	0.606111
1.8893	1.92322	1.92741	1.86765	1.73343	1.55804	1.3814	1.30946	1.38313	1.60758	1.89534	2.12865	2.25367	2.27269	2.22734	2.18377	2.17793	2.21586	2.3109	2.46735	2.6455	2.84077	3.01144	3.0895	3.02478	2.85403	2.63424	2.434	2.34795	2.33551	2.33325	2.26529	2.09659	1.8612	1.6023	1.3151	0.989808	0.607538	0.230957	-0.0930855	-0.321928	-0.450526	-0.533935	-0.611886	-0.680489	-0.74107	-0.785954	-0.818482	-0.86516	-0.90931
1.8893	1.92322	1.92741	1.86765	1.73343	1.55804	1.3814	1.30946	1.38313	1.60758	1.89534	2.12865	2.25367	2.27269	2.22734	2.18377	2.17793	2.21586	2.3109	2.46735	2.6455	2.84077	3.01144	3.0895	3.02478	2.85403	2.63424	2.434	2.34795	2.33551	2.33325	2.26529	2.09659	1.8612	1.6023	1.3151	0.989808	0.607538	0.230957	-0.0930855	-0.321928	-0.450526	-0.533935	-0.611886	-0.680489	-0.74107	-0.785954	-0.818482	-0.86516	-0.90931
-0.923371	-1.00629	-1.10901	-1.18194	-1.16873	-1.03316	-0.772205	-0.441428	-0.117367	0.169803	0.427294	0.674649	0.905128	1.12762	1.30636	1.41342	1.42436	1.34713	1.21523	1.08858	0.993262	0.956798	0.97831	1.03613	1.09806	1.13541	1.12818	1.08062	0.990373	0.886653	0.78739	0.684754	0.585808	0.487179	0.392047	0.279465	0.159795	0.0460241	-0.077885	-0.218118	-0.380733	-0.541954	-0.683718	-0.795071	-0.851325	-0.84725	-0.797199	-0.717269	-0.626521	-0.554819
0.170622	0.206392	0.270305	0.410737	0.544376	0.636269	0.675342	0.646456	0.575657	0.493535	0.452276	0.552603	0.725525	0.912296	1.08189	1.19586	1.22499	1.20576	1.13343	1.05499	0.976431	0.877622	0.809735	0.776107	0.824811	0.973999	1.16999	1.35886	1.46701	1.43286	1.25651	1.10538	1.04775	1.09632	1.24253	1.44591	1.62301	1.71744	1.75916	1.73539	1.70753	1.6654	1.64123	1.61042	1.63834	1.72985	1.88435	2.08854	2.26753	2.39865
0.219764	0.384631	0.513438	0.64047	0.78454	0.939196	1.12505	1.26869	1.28518	1.08464	0.749972	0.454631	0.24443	0.163471	0.163387	0.258216	0.41422	0.674385	1.00571	1.26018	1.31383	1.16103	0.920231	0.650589	0.449488	0.393812	0.462738	0.645044	0.887775	1.11685	1.27862	1.39806	1.46926	1.57939	1.67173	1.77021	1.85325	1.92673	1.98389	2.04836	2.09536	2.07443	1.97407	1.83773	1.69016	1.58763	1.55295	1.57862	1.59243	1.57617
0.520976	0.384642	0.145775	-0.213663	-0.641555	-0.968801	-1.07651	-0.877773	-0.483042	-0.126137	0.117905	0.264562	0.322116	0.375541	0.41509	0.525103	0.605251	0.6471	0.606819	0.525637	0.542522	0.646684	0.783299	0.908677	1.01709	1.04064	0.954719	0.809612	0.663056	0.588421	0.537793	0.452772	0.307332	0.110226	-0.0738242	-0.115733	0.026292	0.337841	0.703141	1.05618	1.35355	1.58198	1.75042	1.86461	1.90319	1.90043	1.84505	1.69689	1.49198	1.2715
-0.264166	-0.187088	-0.0617067	0.0284078	0.0594204	0.000858006	-0.069134	-0.0505681	0.02397	0.190798	0.339831	0.414121	0.30676	0.106787	-0.104275	-0.187802	-0.162303	-0.0360257	0.130095	0.295429	0.441778	0.498155	0.598621	0.720917	0.944525	1.30689	1.7262	2.08554	2.24976	2.20867	2.00984	1.81284	1.63874	1.5675	1.54841	1.62026	1.81066	2.08085	2.35621	2.51173	2.50029	2.40226	2.32494	2.3228	2.31503	2.20791	2.03866	1.90575	1.85876	1.96904
0.332302	0.175828	0.0535492	-0.032532	-0.0246114	0.07135	0.194972	0.32465	0.408489	0.424153	0.406514	0.439247	0.540181	0.725408	0.893549	1.03736	1.11183	1.16926	1.16562	1.17808	1.23047	1.28246	1.35961	1.37675	1.34352	1.26846	1.19292	1.15059	1.14951	1.16686	1.2336	1.28235	1.25329	1.18651	1.10332	1.04506	1.05473	1.07732	1.13412	1.1056	0.982421	0.802879	0.658718	0.595544	0.651562	0.808607	1.01492	1.15478	1.1685	1.06943
0.517207	0.667118	0.751723	0.668666	0.433508	0.139175	-0.101863	-0.282329	-0.365881	-0.378041	-0.311099	-0.0988003	0.198284	0.509726	0.735127	0.883511	0.928363	0.915609	0.900207	0.883928	0.863698	0.817233	0.790705	0.775829	0.785781	0.738009	0.665484	0.552021	0.459572	0.465781	0.575434	0.710057	0.807743	0.879628	0.864546	0.799129	0.744001	0.716149	0.762284	0.913847	1.14682	1.38592	1.60136	1.71776	1.78146	1.74072	1.60181	1.4641	1.39984	1.41151
0.39197	0.337873	0.287237	0.236917	0.242398	0.258069	0.243288	0.129576	0.00447477	-0.0492654	0.0857539	0.32896	0.580369	0.757629	0.813705	0.714655	0.53392	0.292269	0.0599658	-0.169411	-0.306377	-0.298631	-0.170017	-0.0228629	0.101588	0.193868	0.274905	0.327109	0.321758	0.410311	0.66992	0.990185	1.40229	1.6954	1.79947	1.72279	1.45932	1.15639	0.886672	0.693012	0.547007	0.504692	0.52831	0.596135	0.678462	0.668913	0.617498	0.539915	0.45388	0.308738
0.0730728	0.139555	0.151929	0.12149	0.0488016	-0.0570763	-0.125723	-0.140882	-0.0750934	0.0140633	0.078904	0.114161	0.0993772	0.0128415	-0.029558	0.0574215	0.190418	0.376576	0.526592	0.682961	0.855196	1.03445	1.20596	1.39502	1.54853	1.64932	1.70068	1.70986	1.75549	1.80693	1.76221	1.60341	1.36609	1.14	1.0176	0.959078	0.895547	0.862143	0.850171	0.86366	0.917256	1.02971	1.15193	1.28578	1.41265	1.47703	1.48363	1.32349	1.02825	0.732922
1.64172	1.54037	1.33186	1.04622	0.765593	0.588012	0.508444	0.491932	0.554907	0.610741	0.592713	0.479437	0.37357	0.227183	0.203266	0.287144	0.526681	0.832199	1.12902	1.33094	1.43704	1.47789	1.48724	1.53872	1.61314	1.70907	1.77417	1.83463	1.88051	1.9087	1.93183	1.96031	2.03403	2.17189	2.39557	2.58879	2.70952	2.75051	2.77951	2.78482	2.82816	2.88699	2.89643	2.87229	2.7632	2.60223	2.39698	2.17643	2.00785	1.84699
1.83924	1.79512	1.75084	1.74532	1.80572	1.94513	2.13872	2.33171	2.44042	2.43749	2.34903	2.18258	2.00099	1.84318	1.7464	1.70782	1.67563	1.58917	1.45462	1.27606	1.08228	0.918746	0.787271	0.74002	0.726862	0.701344	0.626068	0.516479	0.431693	0.391475	0.363225	0.288952	0.178042	0.0437749	-0.0839515	-0.168081	-0.228335	-0.306784	-0.386169	-0.459011	-0.465835	-0.431017	-0.342624	-0.197868	-0.0475555	0.101836	0.229313	0.329055	0.40221	0.456414
-0.464686	-0.441629	-0.420453	-0.38936	-0.339228	-0.271599	-0.202999	-0.14037	-0.0891128	-0.0504042	-0.0243323	-0.0259412	-0.0521199	-0.101465	-0.13529	-0.128979	-0.0737292	0.00209842	0.0675865	0.0993715	0.0937053	0.070658	0.0523412	0.0486891	0.0468026	0.0534563	0.0696819	0.116278	0.174986	0.232196	0.279668	0.302264	0.308557	0.319549	0.340667	0.349144	0.32401	0.258112	0.160732	0.0660577	0.000320592	-0.0193371	0.0103251	0.0673913	0.123539	0.160945	0.161819	0.121951	0.0362743	-0.0734713
1.08285	1.06704	1.03111	0.938821	0.825304	0.715566	0.62941	0.591973	0.610803	0.668048	0.728797	0.785047	0.804978	0.773659	0.709866	0.629689	0.559566	0.542474	0.605084	0.746414	0.93208	1.11268	1.23019	1.2304	1.11062	0.923592	0.725478	0.558233	0.459377	0.386951	0.293471	0.162129	0.00959016	-0.136881	-0.278787	-0.425794	-0.593019	-0.764823	-0.956518	-1.1324	-1.27586	-1.35041	-1.35768	-1.33206	-1.31732	-1.32939	-1.35521	-1.3898	-1.42251	-1.42701
0.643051	0.420825	0.201654	0.0151644	-0.138257	-0.284359	-0.451723	-0.621499	-0.806369	-0.928876	-0.962626	-0.951352	-0.901463	-0.85078	-0.780439	-0.684797	-0.542197	-0.338963	-0.0799799	0.19129	0.44486	0.685799	0.945793	1.30475	1.78549	2.35482	2.83973	3.0699	3.00057	2.72178	2.35423	1.98941	1.6656	1.4085	1.19477	0.999677	0.810411	0.607633	0.346603	0.0567308	-0.256863	-0.533832	-0.723846	-0.82901	-0.852467	-0.843316	-0.812262	-0.743652	-0.640191	-0.525287
0.538024	0.716583	0.888012	1.00287	1.05332	1.05339	1.04613	1.05955	1.10721	1.18683	1.28588	1.39117	1.48018	1.56022	1.63708	1.71902	1.78669	1.82008	1.80923	1.77183	1.75274	1.78129	1.83883	1.8867	1.87599	1.78616	1.66987	1.56043	1.47401	1.39309	1.28039	1.10524	0.876574	0.626729	0.401755	0.239679	0.143457	0.102001	0.0775187	0.00639553	-0.140897	-0.34966	-0.59465	-0.806427	-0.953952	-1.03695	-1.07328	-1.1123	-1.16105	-1.21422
-0.566105	-0.541308	-0.469137	-0.344698	-0.186324	-0.0394438	0.0705427	0.118485	0.113383	0.0757432	0.0396115	0.0190122	0.0190235	0.0355133	0.0559877	0.0685149	0.0721577	0.0927077	0.13664	0.203213	0.26869	0.318159	0.340077	0.334119	0.337568	0.348822	0.358075	0.363631	0.344696	0.289896	0.217256	0.130567	0.0507247	-0.0235445	-0.109116	-0.214226	-0.34326	-0.482988	-0.616766	-0.73361	-0.833932	-0.92035	-0.994768	-1.03925	-1.05394	-1.04546	-1.03513	-1.03813	-1.08279	-1.16808
0.384057	0.38976	0.426431	0.539503	0.715792	0.934676	1.19533	1.42423	1.61157	1.76107	1.8824	1.97068	2.02948	2.03011	1.95802	1.79149	1.51739	1.15517	0.736066	0.320592	-0.0320218	-0.280883	-0.398814	-0.392267	-0.294278	-0.191027	-0.104374	-0.0586151	-0.0321976	-0.0106981	0.00678495	0.0148846	0.0150953	0.013654	-0.00255283	-0.0446323	-0.136412	-0.278816	-0.478706	-0.694346	-0.885013	-1.01836	-1.09767	-1.1506	-1.20664	-1.27919	-1.35036	-1.42192	-1.43848	-1.38905
1.81264	1.78538	1.75044	1.65939	1.47743	1.1758	0.688539	0.11061	-0.492848	-0.983175	-1.36238	-1.64571	-1.8717	-2.08212	-2.31586	-2.55268	-2.71636	-2.85297	-2.96123	-3.14276	-3.39176	-3.65702	-3.84786	-3.97785	-4.04817	-4.07763	-4.06095	-4.01593	-3.95621	-3.85948	-3.75278	-3.60555	-3.4385	-3.26897	-3.12902	-3.09193	-3.13903	-3.24013	-3.29141	-3.25498	-3.1473	-3.04708	-2.96452	-2.91401	-2.93	-2.98369	-3.02356	-2.95744	-2.76311	-2.51551
0.163485	0.26823	0.405704	0.570048	0.739895	0.888132	1.00775	1.10172	1.16671	1.20599	1.22076	1.21938	1.17616	1.12596	1.10745	1.14197	1.22464	1.34829	1.4883	1.59998	1.67932	1.70478	1.7075	1.70083	1.70848	1.71277	1.65066	1.50275	1.28604	1.0737	0.945768	0.961705	1.08876	1.26184	1.4096	1.50668	1.5472	1.53365	1.49839	1.44467	1.38897	1.31217	1.19962	1.03926	0.841982	0.632619	0.442808	0.300439	0.213673	0.168638
0.399826	0.713375	1.11402	1.57356	1.9892	2.23999	2.24799	2.02303	1.6232	1.13452	0.655007	0.2386	-0.0827794	-0.333684	-0.53011	-0.667962	-0.743783	-0.784397	-0.81162	-0.859666	-0.914127	-0.919908	-0.842253	-0.677169	-0.474138	-0.257338	-0.0532033	0.11903	0.226187	0.219646	0.10716	-0.0745154	-0.266206	-0.432729	-0.578056	-0.738195	-0.922123	-1.11137	-1.29245	-1.45136	-1.56973	-1.63301	-1.6738	-1.70184	-1.73102	-1.75136	-1.80142	-1.88561	-2.00427	-2.13062
1.03709	1.19595	1.37828	1.55779	1.75384	1.95835	2.17884	2.39379	2.57628	2.68542	2.64817	2.44953	2.09532	1.64224	1.16594	0.777913	0.545719	0.492423	0.597508	0.790863	1.04095	1.29728	1.54783	1.78203	2.00027	2.18581	2.33418	2.39748	2.36382	2.18391	1.85564	1.40031	0.866978	0.34344	-0.0837116	-0.404511	-0.662775	-0.872819	-1.07717	-1.30131	-1.50262	-1.65075	-1.6961	-1.58568	-1.33736	-0.956325	-0.518561	-0.122706	0.185842	0.368544
2.79183	2.91996	3.00251	3.04455	3.05135	3.015	2.92606	2.73658	2.43137	2.00801	1.49965	0.966887	0.488892	0.127729	-0.0945756	-0.207384	-0.297807	-0.378702	-0.494394	-0.616785	-0.721869	-0.766378	-0.706317	-0.528194	-0.227933	0.17433	0.608175	1.00793	1.29616	1.42127	1.36415	1.19144	0.972494	0.723682	0.462482	0.157817	-0.157825	-0.481438	-0.799388	-1.1242	-1.45211	-1.77516	-2.06532	-2.31906	-2.56268	-2.81423	-3.07517	-3.30057	-3.43191	-3.5213
0.966357	1.07433	1.18686	1.2794	1.35521	1.41517	1.44898	1.45133	1.43583	1.45964	1.53504	1.66569	1.82292	1.94455	1.96459	1.88043	1.69329	1.47514	1.28719	1.17308	1.14574	1.199	1.32315	1.48137	1.62298	1.70341	1.7012	1.61078	1.48608	1.36694	1.28325	1.21506	1.13004	1.0167	0.863266	0.664366	0.438429	0.223015	0.00878126	-0.197865	-0.422472	-0.66799	-0.947202	-1.22807	-1.45079	-1.5692	-1.57733	-1.51339	-1.42521	-1.38361
0.133884	-0.0559741	-0.232939	-0.354599	-0.395958	-0.384654	-0.34567	-0.337209	-0.375106	-0.425214	-0.458627	-0.451307	-0.376658	-0.25619	-0.0962918	0.100746	0.341049	0.627582	0.959235	1.28797	1.55161	1.68526	1.66554	1.51851	1.29781	1.0305	0.740752	0.443491	0.172761	-0.0296609	-0.170795	-0.276483	-0.342075	-0.406811	-0.475012	-0.539995	-0.574285	-0.589416	-0.608548	-0.666168	-0.764911	-0.902407	-1.03464	-1.15521	-1.25885	-1.35574	-1.4412	-1.50243	-1.56997	-1.62237
1.22358	1.29036	1.37961	1.45201	1.47711	1.40135	1.23889	1.03611	0.81936	0.601807	0.380848	0.165652	-0.0206151	-0.135152	-0.144576	-0.0331778	0.159968	0.378553	0.572432	0.713251	0.792533	0.813048	0.815252	0.838413	0.890888	0.953205	0.982322	0.97667	0.921599	0.854762	0.801217	0.802768	0.851784	0.916086	0.946486	0.905971	0.799519	0.649859	0.481561	0.292953	0.104239	-0.059708	-0.17884	-0.259437	-0.315333	-0.36881	-0.436908	-0.516314	-0.616985	-0.719449
-0.97252	-1.04771	-1.18749	-1.40075	-1.63053	-1.80916	-1.8611	-1.71071	-1.32663	-0.750838	-0.0920196	0.499573	0.910386	1.11507	1.1389	1.03699	0.860991	0.657896	0.445839	0.28646	0.242881	0.339778	0.552534	0.83219	1.11415	1.33218	1.47704	1.54828	1.53932	1.45114	1.28876	1.08893	0.883959	0.699018	0.509121	0.313592	0.112963	-0.08778	-0.246382	-0.351042	-0.411378	-0.44445	-0.466796	-0.476263	-0.468206	-0.42828	-0.386888	-0.356792	-0.355208	-0.370625
0.555502	0.836308	1.05848	1.22592	1.29133	1.28874	1.19986	1.03846	0.810632	0.582411	0.37394	0.24291	0.233314	0.327656	0.48408	0.536605	0.454184	0.257151	0.0627344	-0.0127331	0.00651377	0.0595711	0.115741	0.214824	0.35688	0.561994	0.701747	0.719593	0.550459	0.284081	0.00890691	-0.104028	-0.016446	0.171796	0.309099	0.3784	0.392469	0.365207	0.409026	0.501048	0.668275	0.843297	0.909529	0.895562	0.793076	0.725702	0.726345	0.74078	0.649994	0.513269
0.372708	0.423613	0.419047	0.394832	0.300341	0.182603	0.0585889	-0.0463756	-0.16061	-0.202996	-0.191682	-0.113531	-0.00266391	0.0235556	0.0473942	0.0748619	0.223469	0.501579	0.793247	1.02541	1.17746	1.30189	1.35879	1.38384	1.42181	1.4651	1.42265	1.2932	1.07395	0.823953	0.598761	0.46327	0.396357	0.384162	0.391027	0.438317	0.533005	0.611621	0.676133	0.703227	0.637286	0.496819	0.366238	0.28676	0.350397	0.502523	0.65689	0.775037	0.836587	0.896417
0.176236	0.0561094	-0.0419771	-0.0801041	-0.0716605	-0.00532168	0.118513	0.285192	0.485631	0.650031	0.742754	0.752167	0.718976	0.715086	0.689851	0.707126	0.750912	0.831825	0.907867	0.865017	0.694623	0.477983	0.307889	0.23428	0.258248	0.345535	0.484968	0.657877	0.812883	0.976318	1.13007	1.20709	1.2432	1.1789	1.12118	1.09883	1.13228	1.22278	1.30667	1.32858	1.31132	1.24079	1.17699	1.12374	1.1522	1.21628	1.28576	1.32612	1.30088	1.22336
0.391784	0.442079	0.468394	0.451507	0.472441	0.608634	0.847546	1.10817	1.39643	1.57742	1.63864	1.53956	1.32766	1.04302	0.73022	0.477564	0.315519	0.257119	0.264024	0.365099	0.506711	0.690538	0.826445	0.907245	0.921584	0.992726	1.10863	1.26223	1.38859	1.42151	1.33324	1.11529	0.882265	0.693165	0.595876	0.557375	0.613629	0.740955	0.816218	0.849844	0.821276	0.792456	0.714595	0.667951	0.620419	0.536206	0.426336	0.271373	0.182855	0.191206
-0.366344	-0.365385	-0.366259	-0.416343	-0.482454	-0.513522	-0.506862	-0.502773	-0.417426	-0.239851	0.0206599	0.329931	0.644308	0.877286	0.941075	0.828243	0.647291	0.511272	0.483116	0.642367	0.969238	1.36392	1.7322	1.95268	2.0165	1.96837	1.84122	1.74358	1.7117	1.7567	1.83387	1.95228	2.08134	2.2703	2.44267	2.48653	2.38985	2.13097	1.8381	1.63941	1.60317	1.68102	1.77337	1.83791	1.80373	1.69168	1.5582	1.50618	1.51904	1.52306
0.261219	0.335767	0.44206	0.566378	0.646305	0.658151	0.586397	0.51538	0.478212	0.557485	0.732192	0.970765	1.18962	1.34323	1.40328	1.32622	1.2147	1.10072	1.07642	1.14156	1.24371	1.39253	1.51516	1.60517	1.64536	1.67477	1.69539	1.74779	1.75424	1.7501	1.70431	1.60441	1.47836	1.4094	1.42322	1.54372	1.76437	2.01662	2.24661	2.4162	2.46842	2.42571	2.27439	2.04958	1.78803	1.56725	1.44501	1.39366	1.38222	1.37354
0.508052	0.494657	0.494902	0.45765	0.39344	0.316906	0.224245	0.144793	0.127574	0.165814	0.218671	0.245327	0.316386	0.45159	0.582429	0.640729	0.596282	0.481174	0.396903	0.345892	0.457393	0.670972	0.857737	0.93316	0.862208	0.63199	0.404703	0.29039	0.296722	0.349783	0.370991	0.315672	0.199255	0.11342	0.106075	0.163561	0.181812	0.137088	0.129807	0.321598	0.675997	1.16867	1.62965	1.89362	1.88164	1.64883	1.29499	0.939746	0.69467	0.45082
1.18909	1.16425	1.14234	1.13653	1.14751	1.20805	1.29284	1.32437	1.2306	1.00674	0.755661	0.567283	0.55552	0.602948	0.739196	0.874602	0.966544	1.0429	1.04293	0.933428	0.772561	0.606089	0.57106	0.653458	0.798415	0.912595	0.884895	0.744366	0.619889	0.580402	0.614077	0.728617	0.85642	0.959569	1.06405	1.17994	1.26238	1.34827	1.41514	1.47311	1.53734	1.59216	1.58399	1.53374	1.42408	1.23426	1.00265	0.701076	0.384472	0.196664
0.0969292	-0.134691	-0.192499	0.0321668	0.543322	1.13805	1.50321	1.59599	1.48622	1.32731	1.29461	1.3551	1.42132	1.39343	1.25398	1.11282	1.01232	1.00578	0.991769	1.01415	0.984724	0.954435	0.910471	0.879109	0.829326	0.747722	0.596638	0.372423	0.158172	0.0392924	0.0794737	0.255067	0.461617	0.568915	0.502337	0.398038	0.293519	0.267163	0.34045	0.469941	0.659835	0.850463	1.059	1.27192	1.48206	1.56953	1.55874	1.44486	1.3319	1.33985
0.795709	0.790981	0.802246	0.808453	0.808616	0.77079	0.683535	0.542857	0.383591	0.250769	0.182733	0.170671	0.20094	0.24241	0.278129	0.29871	0.293074	0.246643	0.149966	0.0382842	-0.0433267	-0.0558322	0.0121075	0.116222	0.207755	0.215687	0.131381	0.0039637	-0.125963	-0.215173	-0.242804	-0.206436	-0.12628	0.00475725	0.152216	0.279579	0.362313	0.403779	0.446521	0.506065	0.601087	0.681024	0.676784	0.543677	0.28612	-0.0373421	-0.345299	-0.567918	-0.704886	-0.760508
0.15129	0.115374	0.0773552	0.042862	0.0385427	0.0701416	0.127123	0.193786	0.250208	0.30034	0.352989	0.399549	0.444791	0.494272	0.572338	0.679053	0.806195	0.938873	1.05118	1.11598	1.1191	1.06833	0.978082	0.87498	0.758052	0.632365	0.500872	0.379668	0.289949	0.247358	0.272832	0.350655	0.445434	0.515666	0.543892	0.527335	0.473793	0.384788	0.261404	0.106177	-0.0660533	-0.233915	-0.385497	-0.523689	-0.682714	-0.85398	-1.03618	-1.20696	-1.36062	-1.49966
0.997313	1.03014	1.07113	1.11898	1.16813	1.22551	1.30303	1.39065	1.4679	1.53308	1.5905	1.65179	1.74948	1.87699	2.03355	2.19165	2.32591	2.40947	2.42806	2.42968	2.43077	2.42324	2.39145	2.31739	2.19947	2.04781	1.87236	1.68933	1.52166	1.38853	1.2998	1.2451	1.22917	1.24821	1.30134	1.36645	1.43198	1.46108	1.44729	1.38543	1.31088	1.2427	1.18614	1.13635	1.07332	0.986467	0.895878	0.788498	0.664022	0.545039
-1.81076	-1.97853	-2.11224	-2.13874	-2.01813	-1.74911	-1.36866	-0.950592	-0.554374	-0.221514	0.0207116	0.176845	0.246828	0.257796	0.27676	0.368759	0.557523	0.852884	1.25141	1.6955	2.1418	2.5086	2.7579	2.85999	2.83724	2.7506	2.64179	2.53674	2.45143	2.41461	2.42387	2.47531	2.54918	2.61874	2.63264	2.5356	2.33723	2.07443	1.81131	1.61643	1.49121	1.43195	1.38277	1.31928	1.22644	1.11615	1.01509	0.92974	0.859127	0.816616
-0.500452	-0.45552	-0.405998	-0.351088	-0.296325	-0.236059	-0.162402	-0.0701265	0.0328921	0.127826	0.215545	0.304765	0.419059	0.567635	0.74	0.892447	1.02194	1.14421	1.29724	1.47599	1.64543	1.7646	1.78824	1.70957	1.55586	1.37131	1.18091	0.995374	0.825758	0.693813	0.618631	0.61943	0.678402	0.764791	0.825246	0.836075	0.787984	0.690319	0.571235	0.458636	0.366876	0.290578	0.21967	0.138111	0.0605475	0.00390566	-0.0328461	-0.0653037	-0.120767	-0.212514
1.54869	1.55712	1.57311	1.59835	1.65993	1.75435	1.86493	1.94804	1.93937	1.79866	1.54486	1.21648	0.878568	0.60177	0.422872	0.348111	0.378651	0.481213	0.6324	0.780379	0.896779	0.968991	1.00417	1.03726	1.05372	1.06053	1.02969	0.950081	0.815646	0.650606	0.476516	0.334078	0.223531	0.156978	0.12778	0.10586	0.0807596	0.0161678	-0.0719143	-0.180588	-0.266585	-0.290676	-0.213453	-0.0176315	0.268766	0.591729	0.856208	1.00888	1.03078	0.95442
-1.31885	-1.32639	-1.327	-1.29499	-1.19479	-1.00519	-0.704996	-0.323144	0.0745983	0.445894	0.744166	0.974029	1.15344	1.23365	1.22416	1.14079	1.02992	0.937636	0.890797	0.873299	0.897895	0.981267	1.15449	1.4292	1.76017	2.06916	2.26812	2.3257	2.24459	2.07878	1.8715	1.65601	1.48081	1.35474	1.30471	1.29275	1.27198	1.21536	1.10841	0.967512	0.807904	0.652999	0.523403	0.448752	0.425437	0.446088	0.496777	0.559472	0.617452	0.662622
0.37447	0.377698	0.390963	0.413345	0.450402	0.499839	0.557691	0.615222	0.6783	0.74486	0.819886	0.893197	0.970509	1.08151	1.227	1.39114	1.56151	1.70192	1.79221	1.83673	1.83981	1.84055	1.8571	1.91461	2.01874	2.15616	2.28021	2.35528	2.3524	2.25123	2.09177	1.90351	1.71985	1.53594	1.32469	1.05986	0.756686	0.448195	0.1784	-0.018604	-0.148833	-0.227763	-0.269846	-0.280307	-0.255629	-0.219835	-0.166863	-0.112708	-0.0691088	-0.04323
0.345921	0.34079	0.307529	0.228481	0.129639	0.0516813	0.0478654	0.133189	0.285385	0.478895	0.664519	0.816902	0.916754	0.989736	1.05543	1.12594	1.20906	1.30267	1.40308	1.48849	1.5701	1.65382	1.71816	1.73799	1.70725	1.65653	1.60542	1.58751	1.58298	1.58102	1.5574	1.50754	1.45521	1.39493	1.33398	1.26148	1.14983	0.99312	0.811836	0.625623	0.440104	0.25325	0.0562487	-0.136394	-0.312503	-0.451696	-0.554135	-0.656584	-0.801078	-0.982404
-0.639576	-0.626213	-0.604342	-0.587178	-0.57967	-0.588459	-0.640801	-0.715027	-0.745033	-0.71245	-0.587733	-0.423651	-0.265966	-0.143867	-0.07921	-0.0561992	-0.0384106	-0.00371327	0.0569338	0.139909	0.219422	0.293146	0.334404	0.370669	0.438317	0.563621	0.767458	1.00735	1.19858	1.27437	1.20714	1.04353	0.866349	0.71575	0.606203	0.468428	0.242452	-0.0964328	-0.491955	-0.888618	-1.21414	-1.43483	-1.55527	-1.59398	-1.58854	-1.58927	-1.62546	-1.69617	-1.74967	-1.74561
-0.55608	-0.700213	-0.846026	-1.00261	-1.16493	-1.36489	-1.59666	-1.77901	-1.8416	-1.68539	-1.27642	-0.703477	-0.0772432	0.570002	1.12861	1.5405	1.7676	1.84712	1.84103	1.80935	1.78655	1.7836	1.79183	1.79241	1.83059	1.92262	2.11741	2.40143	2.74223	3.05522	3.22468	3.23445	3.09329	2.90344	2.68055	2.36623	1.94285	1.43326	0.905317	0.43554	0.0903443	-0.126621	-0.222346	-0.184626	0.00901684	0.314486	0.69871	1.05399	1.30126	1.40868
2.60511	2.82061	3.04719	3.27811	3.48193	3.66341	3.85855	4.07706	4.26937	4.37655	4.37689	4.30734	4.23204	4.20733	4.25674	4.36268	4.47043	4.54441	4.56023	4.54107	4.50621	4.51004	4.54504	4.58186	4.56599	4.47305	4.31875	4.1365	3.98779	3.89438	3.82141	3.74663	3.65409	3.55997	3.48569	3.45938	3.45612	3.46924	3.46068	3.41289	3.32657	3.22153	3.11355	2.99986	2.89554	2.79422	2.7276	2.69866	2.68685	2.66801
-0.039951	-0.0882351	-0.150552	-0.231796	-0.292625	-0.323861	-0.300156	-0.258997	-0.255783	-0.285851	-0.317022	-0.313218	-0.246862	-0.12986	0.0149893	0.169243	0.300508	0.429302	0.553154	0.662978	0.772223	0.868778	0.965235	1.07924	1.21698	1.38379	1.55779	1.69369	1.76303	1.74587	1.61976	1.41837	1.17534	0.941731	0.751304	0.605418	0.472944	0.310312	0.0828783	-0.204064	-0.530489	-0.848294	-1.09611	-1.2454	-1.25352	-1.14397	-0.975667	-0.813122	-0.68069	-0.577185
-2.22094	-2.15717	-2.12671	-2.13116	-2.15857	-2.16478	-2.11808	-2.03156	-1.90383	-1.72272	-1.49499	-1.24949	-1.00769	-0.77052	-0.57653	-0.405745	-0.208805	0.0487209	0.357454	0.660435	0.937603	1.13385	1.21201	1.14016	0.979486	0.816299	0.762513	0.860855	1.12436	1.49231	1.82099	2.00638	2.00753	1.85993	1.61261	1.32717	1.01203	0.691224	0.389182	0.134258	-0.0591536	-0.206298	-0.326405	-0.404102	-0.421398	-0.41219	-0.395459	-0.403496	-0.44192	-0.495715
-1.29529	-1.2821	-1.25405	-1.22994	-1.20767	-1.20093	-1.19813	-1.17529	-1.09523	-0.907301	-0.581458	-0.167012	0.266997	0.609012	0.783741	0.804451	0.724627	0.645255	0.650471	0.760566	0.956832	1.18072	1.3862	1.57292	1.7424	1.90028	2.04823	2.17673	2.29901	2.40326	2.43911	2.38957	2.25433	2.07549	1.87851	1.6654	1.45411	1.22503	0.969337	0.69728	0.407077	0.110873	-0.17088	-0.40498	-0.589537	-0.688636	-0.74079	-0.755381	-0.820552	-0.947141
0.665328	0.503996	0.359018	0.320861	0.418742	0.624955	0.843822	0.960479	0.908913	0.767283	0.645661	0.632044	0.719599	0.807104	0.833265	0.796751	0.6797	0.584091	0.605933	0.732912	0.936617	1.21103	1.48088	1.71351	1.84866	1.88792	1.91163	1.94287	1.94805	1.91291	1.85794	1.81624	1.77697	1.8255	1.95343	2.13239	2.30141	2.4078	2.46436	2.48745	2.51667	2.54405	2.53373	2.47068	2.38052	2.24895	2.15793	2.17347	2.26419	2.42629
0.376042	0.41642	0.44265	0.427355	0.296979	0.0773565	-0.147005	-0.276195	-0.208323	-0.0716738	0.0431619	0.0779405	0.0550456	0.0353351	0.0505846	0.195066	0.336139	0.408671	0.405536	0.337563	0.319564	0.452614	0.748404	1.14603	1.48502	1.67326	1.69047	1.65369	1.67207	1.81204	2.06647	2.42646	2.81206	3.21158	3.62644	3.92017	4.05572	4.01754	3.82291	3.57835	3.35432	3.26073	3.28605	3.34916	3.38855	3.33228	3.18776	3.01679	2.85913	2.73873
1.1853	1.33789	1.54678	1.71153	1.84908	1.85693	1.75055	1.52188	1.2665	1.0512	0.924543	0.924073	1.0521	1.22614	1.36816	1.47329	1.48565	1.41811	1.31039	1.24396	1.25921	1.35805	1.38703	1.29197	1.05887	0.766149	0.586559	0.568585	0.745065	1.06502	1.41934	1.73327	1.99817	2.18634	2.3275	2.48989	2.71696	3.06534	3.43447	3.8085	4.07525	4.20316	4.32391	4.44688	4.63882	4.83672	4.98451	4.9654	4.77613	4.43696
1.84004	1.86308	1.93382	2.0438	2.12904	2.22375	2.29646	2.37592	2.48025	2.63548	2.77837	2.86808	2.84546	2.73668	2.58127	2.42116	2.29379	2.20417	2.13296	2.08779	2.09152	2.0683	2.01996	1.91219	1.79489	1.76223	1.84655	2.05774	2.31888	2.50574	2.56757	2.52643	2.44439	2.40196	2.42527	2.48953	2.53368	2.51422	2.43396	2.30899	2.1818	2.11413	2.11984	2.14126	2.12169	2.05338	1.94094	1.74072	1.54327	1.38795
0.475558	0.511317	0.607116	0.675815	0.717267	0.672823	0.558729	0.389027	0.241893	0.133434	0.0591928	-0.0105594	-0.0761392	-0.084505	-0.0986047	-0.0578211	0.0163822	0.164535	0.40021	0.651078	0.833551	0.929812	0.965008	0.945116	0.924831	0.982416	1.08455	1.25229	1.49728	1.73805	1.98866	2.14335	2.16216	2.11603	2.07965	2.10883	2.22403	2.35737	2.46115	2.51836	2.53368	2.49246	2.37179	2.24122	2.1185	2.03055	1.92636	1.73194	1.46839	1.20589
0.549516	0.373858	0.265677	0.223553	0.281397	0.371151	0.41756	0.317789	0.0948785	-0.139119	-0.294312	-0.342865	-0.364067	-0.355041	-0.372775	-0.358345	-0.304878	-0.250321	-0.186653	-0.122658	-0.0611391	-0.0834228	-0.157396	-0.288578	-0.394977	-0.401075	-0.239131	0.024322	0.266522	0.380448	0.383375	0.36322	0.3548	0.468809	0.67291	0.985283	1.35518	1.59845	1.67957	1.67008	1.69089	1.78694	1.89978	1.91184	1.81739	1.68744	1.55455	1.4965	1.39753	1.18052
1.25911	1.14185	1.02992	0.994811	1.03086	1.1192	1.19599	1.17914	0.966682	0.651212	0.287546	0.0543227	0.0380259	0.180452	0.43542	0.6809	0.8504	0.876303	0.783838	0.650339	0.518249	0.467389	0.540444	0.746056	0.999635	1.21528	1.3323	1.39489	1.36329	1.28095	1.24999	1.28441	1.36027	1.52459	1.63103	1.6279	1.54611	1.47635	1.52789	1.68616	1.85563	2.01144	2.12745	2.15064	2.11877	1.9804	1.78022	1.56352	1.35084	1.25667
-0.963036	-0.858852	-0.723422	-0.557523	-0.322225	-0.0644769	0.185754	0.300714	0.239815	0.0324193	-0.292824	-0.623728	-0.868154	-1.01435	-1.04818	-1.00786	-0.964639	-0.946275	-1.01607	-1.15263	-1.29227	-1.36589	-1.3529	-1.26015	-1.10471	-0.917448	-0.770362	-0.735847	-0.771737	-0.802416	-0.761278	-0.586201	-0.298517	0.0161677	0.360585	0.664303	0.88866	1.03017	1.13291	1.20212	1.27059	1.32557	1.40303	1.41414	1.41905	1.39699	1.39523	1.38911	1.34227	1.27678
-0.269398	-0.327532	-0.388443	-0.436772	-0.44598	-0.425764	-0.359813	-0.280617	-0.230702	-0.152358	-0.00295659	0.196053	0.361152	0.487648	0.504184	0.518121	0.533209	0.595774	0.713663	0.805764	0.873342	0.947254	1.0722	1.28392	1.57746	1.82404	1.98301	1.99908	1.90615	1.84463	1.8756	2.02886	2.20554	2.34864	2.44797	2.54065	2.64401	2.734	2.81779	2.8781	2.94274	2.97125	2.93055	2.84977	2.73336	2.60537	2.49523	2.34124	2.09882	1.78397
0.165377	-0.0242992	-0.244693	-0.494653	-0.629308	-0.671627	-0.620917	-0.542577	-0.529541	-0.555588	-0.583599	-0.580693	-0.563462	-0.587794	-0.658633	-0.720216	-0.685885	-0.576504	-0.401593	-0.249155	-0.175379	-0.188562	-0.203752	-0.101472	0.157339	0.504591	0.880907	1.24104	1.6059	1.9391	2.18539	2.31875	2.35419	2.3462	2.34791	2.44651	2.58082	2.68146	2.7419	2.76126	2.73272	2.60138	2.36334	2.08743	1.85282	1.74918	1.86254	2.07151	2.2356	2.24931
0.850345	1.12769	1.37273	1.62238	1.77815	1.88969	1.99002	2.06977	2.11191	2.13222	2.17574	2.30875	2.51824	2.72001	2.83424	2.76241	2.46896	2.01732	1.50388	1.11858	0.974641	1.10352	1.37686	1.60991	1.70999	1.70964	1.71657	1.7807	1.89196	1.96098	1.95592	1.85144	1.71673	1.58409	1.55949	1.76475	2.13351	2.56609	2.91468	3.12338	3.20096	3.16844	3.07618	2.99792	2.92601	2.83913	2.6879	2.48528	2.32153	2.15648
-0.128384	-0.10511	-0.13683	-0.186058	-0.241915	-0.269794	-0.24119	-0.207659	-0.188149	-0.203615	-0.206105	-0.212729	-0.223795	-0.26754	-0.267239	-0.142467	0.0953503	0.368974	0.592211	0.737881	0.751192	0.706422	0.637099	0.622644	0.710833	0.938423	1.26279	1.54898	1.70426	1.75328	1.75781	1.76978	1.80227	1.87192	1.96107	2.02228	2.03101	1.99123	1.91189	1.78366	1.62054	1.46848	1.3379	1.24685	1.1925	1.18818	1.19184	1.18213	1.09572	0.924731
0.711389	0.746228	0.746843	0.681898	0.594759	0.556223	0.635637	0.782096	0.93252	0.983357	0.872155	0.640195	0.405074	0.230247	0.118487	0.0713292	0.0103911	0.0137284	0.123524	0.368869	0.757953	1.19144	1.61815	1.97559	2.27252	2.48413	2.5939	2.54963	2.41732	2.33134	2.26073	2.24934	2.32563	2.50593	2.76295	3.01929	3.19991	3.23517	3.13796	2.99764	2.93818	2.96861	3.05828	3.2125	3.37608	3.57549	3.73257	3.80552	3.7809	3.69666
0.114188	0.155083	0.134107	0.0541368	-0.0980063	-0.242635	-0.313578	-0.346794	-0.32515	-0.362938	-0.468194	-0.598863	-0.670942	-0.619061	-0.501424	-0.314137	-0.0898299	0.0915682	0.242021	0.338265	0.448244	0.616566	0.817403	0.983827	1.13147	1.16462	1.13686	1.09659	1.04264	0.999647	0.976029	1.03101	1.1755	1.3685	1.54953	1.67936	1.79293	1.89244	2.00325	2.09452	2.1374	2.10778	2.00313	1.88334	1.78237	1.76113	1.79266	1.84378	1.87212	1.84232
-0.681261	-0.682093	-0.710024	-0.730933	-0.691562	-0.515517	-0.21275	0.126328	0.388862	0.453381	0.350922	0.171025	-0.0137357	-0.160808	-0.223441	-0.224519	-0.142629	-0.0402429	0.0195355	-0.00197415	-0.105769	-0.263587	-0.419971	-0.569827	-0.679429	-0.674352	-0.539667	-0.319676	-0.0642236	0.176254	0.404775	0.639946	0.894905	1.12551	1.34819	1.59276	1.88405	2.10866	2.18978	2.15933	2.12072	2.17036	2.30923	2.45208	2.4952	2.47049	2.40331	2.42436	2.56223	2.75302
0.266005	0.151013	0.076113	0.0145534	-0.00615935	0.0209853	0.0529143	0.0814348	0.137791	0.263974	0.428319	0.570558	0.65141	0.661458	0.648649	0.630501	0.624535	0.719935	0.845002	1.01767	1.21626	1.44471	1.77029	2.18853	2.66042	3.08594	3.33672	3.36482	3.37949	3.46564	3.67835	3.97312	4.25554	4.43796	4.45156	4.31288	4.11628	3.97466	3.90947	3.85171	3.80478	3.75336	3.71641	3.69534	3.65269	3.60796	3.49125	3.23516	2.88619	2.50447
0.420755	0.279479	0.160433	0.060161	-0.00546018	-0.0688695	-0.121241	-0.0920237	0.00937934	0.224345	0.495766	0.709078	0.891232	1.0496	1.20897	1.41422	1.63615	1.79174	1.96507	2.08788	2.1146	2.04704	1.89393	1.72587	1.56492	1.43623	1.35842	1.34541	1.40959	1.63126	1.96307	2.29656	2.57634	2.78187	2.9974	3.1888	3.37217	3.6177	3.97156	4.34828	4.68612	4.86206	4.83254	4.7059	4.45941	4.17081	3.82978	3.52121	3.29295	3.19758
0.525362	0.460356	0.391311	0.301282	0.227735	0.193811	0.226752	0.336	0.518312	0.712446	0.894785	1.06071	1.18543	1.34944	1.57251	1.78512	1.98789	2.0767	2.06553	1.9425	1.76431	1.54936	1.38055	1.26643	1.25834	1.37565	1.56389	1.80564	2.05652	2.28174	2.42119	2.47791	2.46742	2.45675	2.45057	2.4794	2.56294	2.64809	2.74901	2.80855	2.7869	2.6717	2.50058	2.35977	2.2928	2.27269	2.24279	2.15863	1.98447	1.82509
0.712602	0.918743	1.11387	1.24218	1.27175	1.24328	1.17797	1.12862	1.09078	1.14743	1.24578	1.33854	1.27144	1.04108	0.799164	0.623297	0.612084	0.76192	0.917004	0.964523	0.851624	0.636605	0.43903	0.35528	0.440245	0.557345	0.626063	0.626402	0.594526	0.627446	0.746808	1.00944	1.24308	1.53228	1.87875	2.25805	2.61389	2.92559	3.11823	3.22232	3.1764	3.01065	2.69547	2.34611	2.03607	1.84872	1.80594	1.87839	1.92124	1.89496
0.605382	0.495487	0.440428	0.44092	0.55651	0.805393	1.00918	1.06069	0.895829	0.549826	0.148226	-0.218857	-0.451688	-0.486642	-0.350997	-0.141503	0.0679071	0.150516	0.144913	0.113747	0.11477	0.208731	0.345252	0.463927	0.544785	0.609941	0.743778	1.00196	1.44689	1.94695	2.47057	2.91348	3.25996	3.47211	3.51902	3.40529	3.23707	3.04033	2.93513	2.93642	3.03331	3.25126	3.46083	3.6221	3.67486	3.54699	3.29657	2.97405	2.64758	2.37441
-0.965599	-0.798469	-0.578073	-0.328633	-0.0267362	0.246822	0.455867	0.521182	0.471339	0.342554	0.17102	0.0259213	-0.102571	-0.239639	-0.342417	-0.390165	-0.391765	-0.361424	-0.30471	-0.197711	-0.0245876	0.17324	0.406465	0.566766	0.691127	0.870752	1.10248	1.35762	1.60301	1.85419	2.01769	2.16013	2.34189	2.58676	2.86794	3.05939	3.19281	3.1897	3.14616	3.10887	3.07412	3.03303	2.93094	2.84745	2.77767	2.68232	2.55929	2.41933	2.26631	2.14625
0.830507	1.04323	1.28547	1.51424	1.66509	1.75648	1.80114	1.7857	1.80929	1.89211	2.10331	2.34593	2.55536	2.67016	2.74716	2.7311	2.67197	2.58352	2.56231	2.60918	2.76306	2.8822	3.03153	3.17939	3.29369	3.38695	3.42177	3.38244	3.35254	3.41534	3.59804	3.85955	4.09841	4.34324	4.54453	4.63212	4.72055	4.79215	4.82976	4.88264	4.90018	4.90862	4.84722	4.71206	4.48988	4.2315	4.01786	3.8907	3.85736	3.90163
0.830507	1.04323	1.28547	1.51424	1.66509	1.75648	1.80114	1.7857	1.80929	1.89211	2.10331	2.34593	2.55536	2.67016	2.74716	2.7311	2.67197	2.58352	2.56231	2.60918	2.76306	2.8822	3.03153	3.17939	3.29369	3.38695	3.42177	3.38244	3.35254	3.41534	3.59804	3.85955	4.09841	4.34324	4.54453	4.63212	4.72055	4.79215	4.82976	4.88264	4.90018	4.90862	4.84722	4.71206	4.48988	4.2315	4.01786	3.8907	3.85736	3.90163
-0.561584	-0.571271	-0.532952	-0.427851	-0.303005	-0.181705	-0.136694	-0.161428	-0.262544	-0.343945	-0.392355	-0.393198	-0.401649	-0.428155	-0.438106	-0.407271	-0.311817	-0.157748	0.00427164	0.163754	0.207151	0.180145	0.0722375	-0.0758781	-0.168311	-0.141139	0.0190546	0.259735	0.515869	0.690539	0.770942	0.701107	0.588757	0.508383	0.511971	0.589454	0.757162	0.990017	1.2955	1.67589	2.00166	2.20667	2.21783	2.08986	1.92846	1.81974	1.80836	1.90117	1.99416	2.08089
0.321948	0.226726	0.195421	0.231931	0.317011	0.376706	0.422933	0.471227	0.55854	0.658076	0.746814	0.844061	0.920341	0.988282	1.02198	0.990371	0.94457	0.90735	0.935135	1.02589	1.11421	1.1561	1.15218	1.14302	1.15167	1.18493	1.21313	1.20609	1.13653	1.03548	0.931369	0.89698	0.928753	1.06102	1.21276	1.36405	1.49351	1.59278	1.76271	1.95551	2.14028	2.22235	2.16431	1.97254	1.74494	1.53341	1.42115	1.42258	1.468	1.51586
0.321948	0.226726	0.195421	0.231931	0.317011	0.376706	0.422933	0.471227	0.55854	0.658076	0.746814	0.844061	0.920341	0.988282	1.02198	0.990371	0.94457	0.90735	0.935135	1.02589	1.11421	1.1561	1.15218	1.14302	1.15167	1.18493	1.21313	1.20609	1.13653	1.03548	0.931369	0.89698	0.928753	1.06102	1.21276	1.36405	1.49351	1.59278	1.76271	1.95551	2.14028	2.22235	2.16431	1.97254	1.74494	1.53341	1.42115	1.42258	1.468	1.51586
0.321948	0.226726	0.195421	0.231931	0.317011	0.376706	0.422933	0.471227	0.55854	0.658076	0.746814	0.844061	0.920341	0.988282	1.02198	0.990371	0.94457	0.90735	0.935135	1.02589	1.11421	1.1561	1.15218	1.14302	1.15167	1.18493	1.21313	1.20609	1.13653	1.03548	0.931369	0.89698	0.928753	1.06102	1.21276	1.36405	1.49351	1.59278	1.76271	1.95551	2.14028	2.22235	2.16431	1.97254	1.74494	1.53341	1.42115	1.42258	1.468	1.51586
0.321948	0.226726	0.195421	0.231931	0.317011	0.376706	0.422933	0.471227	0.55854	0.658076	0.746814	0.844061	0.920341	0.988282	1.02198	0.990371	0.94457	0.90735	0.935135	1.02589	1.11421	1.1561	1.15218	1.14302	1.15167	1.18493	1.21313	1.20609	1.13653	1.03548	0.931369	0.89698	0.928753	1.06102	1.21276	1.36405	1.49351	1.59278	1.76271	1.95551	2.14028	2.22235	2.16431	1.97254	1.74494	1.53341	1.42115	1.42258	1.468	1.51586
0.0639434	0.187042	0.350005	0.530185	0.743976	0.982048	1.14182	1.20585	1.20969	1.19796	1.18749	1.15808	1.09546	1.02799	0.994649	1.07568	1.19474	1.27484	1.2776	1.13012	0.941285	0.68845	0.492143	0.296542	0.169503	0.0215448	-0.10805	-0.244817	-0.344244	-0.414722	-0.415499	-0.3082	-0.117882	0.105099	0.30854	0.395505	0.391079	0.291112	0.178237	0.0731714	-0.0994826	-0.271269	-0.451841	-0.619872	-0.684279	-0.721853	-0.753927	-0.778845	-0.814395	-0.79667
-0.866538	-0.67198	-0.508011	-0.388342	-0.382732	-0.554047	-0.803097	-0.989304	-1.06102	-0.992244	-0.890599	-0.817471	-0.837479	-0.970985	-1.16166	-1.32966	-1.43493	-1.43594	-1.33026	-1.11932	-0.839178	-0.554494	-0.33793	-0.185368	-0.0915603	-0.00232431	0.0467566	-0.0445765	-0.226847	-0.410223	-0.481984	-0.494377	-0.520445	-0.625638	-0.732109	-0.767502	-0.676329	-0.513969	-0.367532	-0.284145	-0.292576	-0.316821	-0.409798	-0.541669	-0.6588	-0.739303	-0.751443	-0.67806	-0.539455	-0.410343
-0.743382	-0.711544	-0.681298	-0.661734	-0.660507	-0.676734	-0.69864	-0.710302	-0.699056	-0.650271	-0.563864	-0.433345	-0.261836	-0.0335665	0.243063	0.528919	0.764998	0.90995	0.923928	0.810883	0.598429	0.330018	0.0737417	-0.112588	-0.184217	-0.154927	-0.0751752	-0.0109889	0.00334206	-0.0594368	-0.212691	-0.465475	-0.802249	-1.18631	-1.54085	-1.81692	-1.99671	-2.11426	-2.20288	-2.29447	-2.41205	-2.55471	-2.71551	-2.86744	-3.0053	-3.11418	-3.19557	-3.25805	-3.29434	-3.29435
0.292856	0.191739	0.0677021	-0.0531836	-0.127243	-0.0541846	0.258953	0.844602	1.62623	2.42223	3.03879	3.34993	3.34886	3.10005	2.70563	2.24402	1.78898	1.41062	1.15279	1.02246	0.999442	1.06681	1.19072	1.3379	1.46081	1.51211	1.44447	1.28814	1.06393	0.79855	0.501032	0.184614	-0.139793	-0.447592	-0.711392	-0.909187	-1.05729	-1.17028	-1.23327	-1.24221	-1.22692	-1.22216	-1.22352	-1.20891	-1.16801	-1.10118	-1.00014	-0.887986	-0.783429	-0.682622
1.14342	1.00732	0.850733	0.691032	0.580146	0.55174	0.609707	0.705503	0.78485	0.82121	0.825628	0.817387	0.815015	0.833131	0.879909	0.963637	1.09045	1.25017	1.44913	1.65481	1.8441	2.01717	2.1818	2.32868	2.42498	2.4125	2.25965	1.98163	1.64924	1.35017	1.15935	1.08984	1.07459	1.04821	0.953161	0.775412	0.532129	0.2506	-0.0577953	-0.365533	-0.658865	-0.903437	-1.07082	-1.17893	-1.25619	-1.32571	-1.39258	-1.45113	-1.51976	-1.62913
-0.502525	-0.432703	-0.372753	-0.332106	-0.311183	-0.299215	-0.291326	-0.282161	-0.265133	-0.253394	-0.243283	-0.240792	-0.245826	-0.255782	-0.269251	-0.294779	-0.340545	-0.417859	-0.513968	-0.539813	-0.425893	-0.109889	0.391959	0.989505	1.52579	1.85508	1.91226	1.72479	1.40017	1.0581	0.840721	0.812276	0.976949	1.25571	1.53819	1.76002	1.8748	1.86162	1.70495	1.38124	0.891069	0.278254	-0.376906	-0.982266	-1.42931	-1.6801	-1.75133	-1.73028	-1.69787	-1.69961
-0.514039	-0.61393	-0.75734	-0.88498	-0.979547	-0.983484	-0.87288	-0.696152	-0.551192	-0.527251	-0.639735	-0.845668	-1.0701	-1.26966	-1.35923	-1.24801	-0.850043	-0.11626	0.912387	2.06114	3.08225	3.73061	3.86992	3.55437	2.89572	2.10568	1.3731	0.871189	0.702706	0.845781	1.20699	1.64538	2.03192	2.26835	2.31237	2.19005	1.9865	1.72736	1.4227	1.02113	0.497477	-0.135489	-0.811132	-1.44028	-1.94523	-2.28907	-2.47333	-2.49122	-2.38355	-2.21411
-0.514039	-0.61393	-0.75734	-0.88498	-0.979547	-0.983484	-0.87288	-0.696152	-0.551192	-0.527251	-0.639735	-0.845668	-1.0701	-1.26966	-1.35923	-1.24801	-0.850043	-0.11626	0.912387	2.06114	3.08225	3.73061	3.86992	3.55437	2.89572	2.10568	1.3731	0.871189	0.702706	0.845781	1.20699	1.64538	2.03192	2.26835	2.31237	2.19005	1.9865	1.72736	1.4227	1.02113	0.497477	-0.135489	-0.811132	-1.44028	-1.94523	-2.28907	-2.47333	-2.49122	-2.38355	-2.21411
0.581729	0.585098	0.526553	0.363246	0.0941064	-0.224566	-0.485002	-0.625642	-0.637594	-0.665965	-0.824336	-1.15684	-1.57718	-1.98427	-2.28092	-2.40661	-2.35355	-2.09828	-1.66304	-1.11941	-0.549236	-0.0490295	0.311245	0.494053	0.451979	0.193128	-0.262754	-0.839331	-1.40926	-1.86166	-2.13381	-2.26457	-2.28487	-2.22662	-2.10583	-1.94271	-1.75131	-1.54658	-1.34455	-1.15366	-0.998405	-0.882044	-0.834559	-0.867589	-0.955135	-1.06564	-1.13562	-1.1848	-1.22259	-1.3264
0.280556	0.212656	0.119309	0.014245	-0.0823899	-0.158784	-0.222385	-0.253473	-0.245305	-0.200751	-0.146684	-0.108524	-0.0943387	-0.116482	-0.124051	-0.0823745	-0.00951646	0.0676472	0.144291	0.213508	0.282726	0.33804	0.430552	0.608625	0.880115	1.25537	1.68332	2.07843	2.30178	2.3582	2.3194	2.32908	2.43636	2.65491	2.92626	3.15622	3.26646	3.17403	2.85479	2.36984	1.83504	1.35195	0.987632	0.783082	0.69151	0.667766	0.632253	0.55484	0.435469	0.317548
-0.553814	-0.548799	-0.536302	-0.526868	-0.527493	-0.523056	-0.527672	-0.535536	-0.548116	-0.566458	-0.589332	-0.607008	-0.613173	-0.596717	-0.570493	-0.56257	-0.579998	-0.629483	-0.67644	-0.700948	-0.650616	-0.515709	-0.280616	0.0390105	0.424979	0.86484	1.30358	1.71062	2.04215	2.31762	2.55807	2.81355	3.05609	3.24705	3.32607	3.22172	2.9319	2.51867	2.07889	1.69108	1.36776	1.09348	0.860556	0.642218	0.435519	0.224279	0.0155976	-0.206809	-0.395748	-0.529055
0.630497	0.629764	0.634998	0.648629	0.652556	0.657578	0.675394	0.670069	0.633235	0.574546	0.571278	0.643003	0.793152	0.97495	1.12222	1.22771	1.28551	1.30664	1.31568	1.31905	1.32108	1.34496	1.40757	1.58864	1.90755	2.38498	2.93826	3.45333	3.83411	4.05273	4.13637	4.13182	4.07904	3.97565	3.79983	3.51745	3.11344	2.60681	2.05354	1.5448	1.13449	0.853193	0.679053	0.577506	0.471296	0.33873	0.149191	-0.0787958	-0.289531	-0.447914
1.64205	1.64636	1.60193	1.5061	1.33088	1.16124	1.05256	0.986496	0.970341	0.962987	1.00619	1.06455	1.1032	1.11055	1.12351	1.15633	1.24067	1.33298	1.43227	1.48037	1.46754	1.43166	1.37513	1.28622	1.17606	1.04341	0.920239	0.841835	0.763726	0.704031	0.655346	0.654228	0.717486	0.808102	0.941671	1.05886	1.13339	1.14827	1.13089	1.13611	1.20203	1.30005	1.32515	1.32032	1.28259	1.24758	1.18827	1.11764	1.05756	1.00349
0.172562	0.0327016	-0.12754	-0.294299	-0.369597	-0.363843	-0.282439	-0.189821	-0.0946128	-0.0903021	-0.11788	-0.102591	-0.0357551	0.0513696	0.0595167	0.0702842	0.136917	0.260328	0.401022	0.467115	0.435078	0.321281	0.180255	0.110877	0.1032	0.189978	0.304743	0.433361	0.583849	0.735697	0.812474	0.834423	0.835804	0.872222	1.00105	1.21617	1.44588	1.66319	1.81635	2.00701	2.15165	2.28168	2.32589	2.24715	2.00818	1.6695	1.29743	1.00788	0.802125	0.640554
-0.955582	-0.491767	-0.00172083	0.436629	0.69201	0.588525	0.275718	-0.0196737	-0.125007	0.0100656	0.276599	0.521104	0.673713	0.758361	0.815655	0.887184	0.882392	0.771903	0.589993	0.403188	0.286264	0.211628	0.168	0.0365495	-0.0742925	-0.130226	-0.0976204	0.0307555	0.219448	0.44528	0.704274	0.967987	1.2283	1.41825	1.54512	1.59206	1.60729	1.60598	1.68966	1.89843	2.22778	2.58266	2.80836	2.88676	2.85223	2.72782	2.60189	2.509	2.41377	2.3982
-0.892514	-0.96518	-1.07465	-1.16874	-1.19364	-1.11655	-0.967137	-0.749642	-0.533223	-0.428891	-0.380852	-0.373572	-0.337093	-0.259933	-0.172499	-0.0223791	0.115611	0.183077	0.110161	-0.0792849	-0.278618	-0.48089	-0.633762	-0.761008	-0.846971	-0.87735	-0.873937	-0.882499	-0.858748	-0.841238	-0.81993	-0.746815	-0.671451	-0.618659	-0.525307	-0.37766	-0.176915	0.118766	0.425247	0.729795	0.972145	1.1104	1.24587	1.40032	1.54729	1.65652	1.70933	1.70126	1.62938	1.53416
1.38749	1.60555	1.7522	1.80517	1.83483	1.87069	2.01365	2.26216	2.51044	2.70639	2.78372	2.74623	2.63098	2.54565	2.54832	2.63391	2.79867	3.01185	3.23543	3.45646	3.60338	3.68053	3.72261	3.73941	3.78373	3.82209	3.86962	3.91671	3.91602	3.92902	3.96306	4.00717	4.07718	4.12805	4.1248	4.07456	4.03406	4.07174	4.14989	4.28884	4.43075	4.55126	4.59308	4.50735	4.34125	4.18797	4.04725	3.94484	3.88133	3.78924
-0.729797	-0.749342	-0.739314	-0.678475	-0.607506	-0.527158	-0.538901	-0.643971	-0.778625	-0.889346	-0.953632	-0.937016	-0.873818	-0.800972	-0.712261	-0.566	-0.361506	-0.135983	0.108594	0.330362	0.44864	0.449608	0.451894	0.496811	0.643665	0.904809	1.19123	1.47175	1.67446	1.76023	1.78395	1.76591	1.73559	1.74816	1.77517	1.80187	1.84202	1.84259	1.84417	1.87793	1.92515	1.9863	2.092	2.27307	2.50447	2.74275	2.94081	3.02672	2.97408	2.80586
1.08304	0.879346	0.66962	0.431154	0.236732	0.186303	0.224582	0.338165	0.36927	0.312975	0.284062	0.31126	0.460687	0.631741	0.73741	0.711814	0.598874	0.471457	0.401248	0.376218	0.403376	0.503513	0.654198	0.749307	0.721984	0.595277	0.41216	0.253447	0.139961	0.0722476	0.0529546	0.00272067	0.0317226	0.140756	0.355678	0.60025	0.958962	1.36347	1.7678	2.10951	2.35944	2.49039	2.54958	2.6248	2.76168	2.91503	3.02666	3.09526	2.97278	2.738
1.08304	0.879346	0.66962	0.431154	0.236732	0.186303	0.224582	0.338165	0.36927	0.312975	0.284062	0.31126	0.460687	0.631741	0.73741	0.711814	0.598874	0.471457	0.401248	0.376218	0.403376	0.503513	0.654198	0.749307	0.721984	0.595277	0.41216	0.253447	0.139961	0.0722476	0.0529546	0.00272067	0.0317226	0.140756	0.355678	0.60025	0.958962	1.36347	1.7678	2.10951	2.35944	2.49039	2.54958	2.6248	2.76168	2.91503	3.02666	3.09526	2.97278	2.738
0.499149	0.397238	0.333635	0.270583	0.290129	0.394851	0.566372	0.812991	1.04825	1.28598	1.48723	1.65679	1.85965	2.07155	2.21468	2.26902	2.23026	2.10035	1.96345	1.88351	1.99502	2.26513	2.59317	2.87511	2.96563	2.86943	2.63709	2.42147	2.24705	2.15061	2.06421	1.99487	1.96903	2.00064	2.13658	2.3719	2.67337	2.98582	3.25127	3.42529	3.52125	3.54173	3.53342	3.52533	3.58767	3.69112	3.82667	3.8565	3.79041	3.63471
0.499149	0.397238	0.333635	0.270583	0.290129	0.394851	0.566372	0.812991	1.04825	1.28598	1.48723	1.65679	1.85965	2.07155	2.21468	2.26902	2.23026	2.10035	1.96345	1.88351	1.99502	2.26513	2.59317	2.87511	2.96563	2.86943	2.63709	2.42147	2.24705	2.15061	2.06421	1.99487	1.96903	2.00064	2.13658	2.3719	2.67337	2.98582	3.25127	3.42529	3.52125	3.54173	3.53342	3.52533	3.58767	3.69112	3.82667	3.8565	3.79041	3.63471
-0.567092	-0.420447	-0.225439	0.0266657	0.212746	0.30592	0.352072	0.453137	0.631358	0.848279	1.05109	1.18656	1.22869	1.19399	1.14179	1.11781	1.18022	1.30446	1.44757	1.54234	1.56142	1.58415	1.61526	1.69424	1.86132	1.98508	2.08123	2.16526	2.30259	2.39059	2.32907	2.1587	1.8834	1.68954	1.64048	1.74918	1.9609	2.20313	2.34603	2.35142	2.2395	2.0946	1.90254	1.70621	1.49432	1.34369	1.23787	1.21874	1.33967	1.56994
0.640076	0.504331	0.479259	0.626214	0.793383	0.902874	0.837941	0.667855	0.476382	0.395989	0.420891	0.609212	0.783294	0.932359	1.0146	1.02834	1.01672	1.04732	1.18708	1.41438	1.63774	1.77847	1.86484	1.93905	2.07845	2.22433	2.32929	2.29708	2.18648	2.07181	2.0557	2.19861	2.42579	2.66008	2.8016	2.85341	2.82195	2.75436	2.62318	2.50628	2.44579	2.4329	2.47133	2.48155	2.40261	2.28976	2.25016	2.34437	2.59627	2.90925
1.38308	1.57699	1.7187	1.78196	1.75364	1.66723	1.59971	1.56111	1.63007	1.90787	2.24616	2.55271	2.70593	2.77549	2.8527	3.03343	3.17977	3.30828	3.41891	3.56791	3.72443	3.80748	3.81618	3.74154	3.69665	3.7425	3.86243	3.97074	4.01708	3.99553	3.96275	3.97308	4.01088	4.02265	3.98904	3.92909	3.88062	3.81783	3.73839	3.63085	3.46851	3.24586	2.94661	2.69647	2.52622	2.48284	2.46409	2.38447	2.29819	2.15422
1.5057	1.51186	1.58958	1.69933	1.77967	1.72789	1.53395	1.26241	1.02787	0.879153	0.822736	0.876191	1.0455	1.28083	1.53186	1.72696	1.91035	2.03702	2.09055	2.07858	2.01925	1.92415	1.87398	1.9236	2.02407	2.08152	2.04405	1.9834	1.92066	1.88168	1.93935	2.01691	2.06666	2.01568	1.92729	1.84027	1.83162	1.94106	2.16513	2.44398	2.72956	2.94766	3.03362	3.06219	3.00832	2.91596	2.81634	2.73633	2.66557	2.60043
1.38446	1.41076	1.40828	1.40005	1.43447	1.53923	1.69402	1.7842	1.82263	1.76678	1.73531	1.74258	1.80142	1.86981	1.90805	1.90659	1.88567	1.80291	1.62938	1.31871	0.980542	0.693823	0.522819	0.465372	0.468853	0.447782	0.381225	0.280468	0.226597	0.249697	0.3421	0.471973	0.631013	0.721399	0.715825	0.634857	0.513807	0.38806	0.29644	0.279244	0.313384	0.323682	0.210602	0.0157665	-0.244074	-0.479021	-0.672612	-0.751527	-0.786644	-0.80201
1.48245	1.53078	1.59676	1.6752	1.75314	1.79287	1.71722	1.56756	1.39443	1.30367	1.26359	1.29722	1.40904	1.54112	1.63031	1.68089	1.68738	1.66072	1.64471	1.58602	1.49489	1.36392	1.29238	1.32399	1.51196	1.82038	2.15548	2.42529	2.54144	2.52729	2.43731	2.25853	2.07509	1.94531	1.90575	1.9813	2.09183	2.15835	2.13128	2.01024	1.81055	1.62549	1.40103	1.17179	0.963061	0.779714	0.675469	0.657421	0.692038	0.756261
1.48245	1.53078	1.59676	1.6752	1.75314	1.79287	1.71722	1.56756	1.39443	1.30367	1.26359	1.29722	1.40904	1.54112	1.63031	1.68089	1.68738	1.66072	1.64471	1.58602	1.49489	1.36392	1.29238	1.32399	1.51196	1.82038	2.15548	2.42529	2.54144	2.52729	2.43731	2.25853	2.07509	1.94531	1.90575	1.9813	2.09183	2.15835	2.13128	2.01024	1.81055	1.62549	1.40103	1.17179	0.963061	0.779714	0.675469	0.657421	0.692038	0.756261
-0.521447	-0.339235	-0.0944307	0.171808	0.413353	0.611043	0.744792	0.881482	1.08255	1.36156	1.69584	2.01424	2.26875	2.45635	2.51742	2.44342	2.23863	2.02094	1.92904	1.98813	2.14969	2.35727	2.5014	2.51653	2.39875	2.26076	2.23578	2.27712	2.40406	2.53841	2.54267	2.41978	2.31926	2.3267	2.48962	2.74299	2.94875	3.07364	3.08774	3.04449	2.9325	2.8242	2.74736	2.73297	2.70465	2.63718	2.57644	2.50683	2.42382	2.32185
0.123042	0.182366	0.261168	0.44405	0.624905	0.723498	0.759305	0.674309	0.532485	0.483434	0.531548	0.698418	0.981343	1.32483	1.64524	1.91386	2.07379	2.12682	2.14415	2.14372	2.18436	2.24349	2.29797	2.34195	2.30926	2.21267	2.13685	2.22329	2.44801	2.63794	2.75141	2.72707	2.58009	2.40338	2.27596	2.21053	2.14635	2.0752	2.00802	1.98278	1.99334	2.01876	2.05865	2.06911	2.07508	2.06487	2.05485	1.95607	1.90244	1.84013
2.30601	2.47819	2.66319	2.84644	2.95845	2.958	2.8169	2.55701	2.25647	2.02927	1.94889	2.0354	2.22859	2.44139	2.59929	2.6698	2.69821	2.70698	2.71944	2.72718	2.75866	2.80654	2.81047	2.73416	2.62989	2.54792	2.54679	2.62582	2.74711	2.8612	2.96952	3.0478	3.09229	3.08378	3.02339	2.88697	2.6437	2.33167	1.95841	1.55754	1.12744	0.644863	0.149646	-0.294358	-0.637885	-0.828537	-0.878917	-0.842588	-0.769304	-0.684908
0.7955	0.956849	1.15639	1.39402	1.64129	1.86795	2.06661	2.24895	2.43322	2.61896	2.76108	2.80315	2.72193	2.51434	2.23736	1.94317	1.67913	1.47281	1.33416	1.27862	1.30721	1.38649	1.47823	1.54701	1.60242	1.67662	1.77188	1.85761	1.90333	1.8896	1.83261	1.71085	1.52337	1.2847	1.00528	0.723752	0.48449	0.30534	0.181771	0.10034	0.0303357	-0.0332036	-0.103826	-0.181919	-0.251146	-0.321366	-0.3932	-0.447757	-0.485437	-0.518134
2.60958	2.70163	2.75647	2.75275	2.66208	2.52279	2.39699	2.33733	2.35341	2.35973	2.30786	2.2099	2.14145	2.18326	2.41542	2.77663	3.11416	3.2263	3.01671	2.56705	2.10605	1.87244	1.95288	2.27206	2.71072	3.11048	3.36839	3.44715	3.38692	3.2151	2.96333	2.61098	2.18555	1.70492	1.2804	0.934678	0.678183	0.456418	0.211314	-0.116928	-0.53305	-0.956172	-1.33375	-1.60339	-1.76653	-1.75202	-1.53711	-1.12142	-0.5702	-0.0468077
-0.503878	-0.470393	-0.414384	-0.342391	-0.247894	-0.130947	0.0133973	0.170337	0.330104	0.467708	0.559605	0.590041	0.556562	0.47635	0.369053	0.26044	0.168518	0.104406	0.0670902	0.0679135	0.102023	0.165338	0.238396	0.292772	0.297264	0.249303	0.164791	0.0806677	0.0322941	0.0432865	0.101353	0.172798	0.218276	0.222185	0.194985	0.163661	0.146177	0.136367	0.115623	0.0590869	-0.0465284	-0.195323	-0.368196	-0.545045	-0.702591	-0.841577	-0.965481	-1.07602	-1.16422	-1.23374
0.81733	0.523631	0.165021	-0.225048	-0.610621	-0.953224	-1.28843	-1.61656	-1.89706	-2.03986	-1.98124	-1.70615	-1.27864	-0.806386	-0.404221	-0.117211	0.0569498	0.155325	0.22461	0.313281	0.432339	0.580758	0.746545	0.917929	1.08958	1.24865	1.38425	1.47265	1.49447	1.43606	1.30332	1.13332	0.955599	0.790744	0.62509	0.43575	0.196281	-0.0996589	-0.443096	-0.797537	-1.10282	-1.31239	-1.40617	-1.37226	-1.2115	-0.9833	-0.75659	-0.617448	-0.596166	-0.662775
1.96362	2.07637	2.19364	2.30176	2.35397	2.33296	2.24907	2.14662	2.05427	1.97531	1.90315	1.81244	1.69572	1.59485	1.53693	1.5119	1.50089	1.4715	1.39171	1.28181	1.16802	1.09049	1.07616	1.11344	1.19603	1.29788	1.36914	1.38957	1.36967	1.34076	1.31334	1.28816	1.2542	1.18877	1.05575	0.866467	0.631869	0.382902	0.131247	-0.110592	-0.36879	-0.650926	-0.924343	-1.15397	-1.31824	-1.43472	-1.54562	-1.676	-1.8308	-1.99632
-0.114486	-0.0756917	-0.0452344	0.0705822	0.260547	0.477301	0.602683	0.615001	0.491027	0.334623	0.252704	0.239386	0.255634	0.240267	0.182977	0.144936	0.161654	0.266442	0.435328	0.66126	0.823819	0.875709	0.779717	0.627944	0.444621	0.314172	0.279919	0.282778	0.30683	0.324184	0.327742	0.321036	0.33732	0.415572	0.554224	0.736796	0.985411	1.23603	1.43396	1.54352	1.56013	1.50148	1.40866	1.3333	1.39853	1.51826	1.60868	1.55835	1.34576	1.00972
-0.168636	-0.176641	-0.0614129	0.108349	0.303917	0.451534	0.476996	0.346375	0.108469	-0.166231	-0.415846	-0.605657	-0.709013	-0.754524	-0.759763	-0.747143	-0.68795	-0.641921	-0.563498	-0.40124	-0.149049	0.146588	0.368743	0.402093	0.252016	0.0166405	-0.238916	-0.469855	-0.63499	-0.762932	-0.836648	-0.75484	-0.462803	0.0752548	0.706788	1.2621	1.61196	1.74396	1.69308	1.59195	1.47106	1.44032	1.44965	1.3704	1.29301	1.18008	1.10173	1.06686	1.07894	1.06466
1.78803	1.91933	2.04978	2.1739	2.26681	2.31859	2.39919	2.46852	2.52771	2.53288	2.41789	2.30965	2.23973	2.2701	2.37646	2.49198	2.54147	2.49904	2.40711	2.32213	2.31413	2.39814	2.52783	2.69995	2.90433	3.12297	3.32072	3.53309	3.67536	3.78986	3.92695	4.10214	4.31385	4.44374	4.43942	4.24396	3.95633	3.73189	3.68884	3.7979	3.89931	3.8332	3.55413	3.12205	2.68846	2.31698	2.08186	1.89072	1.74984	1.57828
0.400601	0.205513	-0.0514746	-0.307807	-0.458186	-0.455664	-0.297826	-0.0305092	0.253939	0.399203	0.428466	0.44787	0.517131	0.734456	1.01442	1.17613	1.18661	1.01111	0.789106	0.570778	0.413549	0.317891	0.336506	0.420159	0.514015	0.569637	0.51831	0.440772	0.432437	0.550992	0.751058	0.94455	1.0177	1.00156	0.979174	1.04375	1.21315	1.41125	1.601	1.72693	1.79756	1.8559	1.93184	2.06682	2.27067	2.48783	2.73858	2.93921	2.98209	2.84483
0.459633	0.337153	0.201935	0.0964082	-6.41839e-06	-0.118696	-0.283315	-0.497462	-0.701031	-0.883559	-0.96535	-0.925748	-0.745971	-0.489348	-0.203864	0.01278	0.111385	0.0662958	-0.00495779	-0.0690475	-0.0536997	-0.00543693	0.0476975	0.0260483	-0.055986	-0.19286	-0.293352	-0.282943	-0.223328	-0.114148	-0.00239265	0.0996745	0.171378	0.223042	0.295887	0.372281	0.449198	0.573024	0.834809	1.18494	1.55509	1.9122	2.20681	2.45223	2.6497	2.81469	2.96598	3.05479	3.0196	2.87541
1.05081	0.938219	0.838211	0.77531	0.750324	0.726149	0.709154	0.634459	0.587348	0.529711	0.520086	0.498379	0.420694	0.270459	0.04607	-0.192411	-0.351115	-0.44727	-0.471787	-0.465402	-0.416038	-0.315291	-0.204896	-0.0967771	-0.00319941	0.0659252	0.202675	0.49271	0.87835	1.24275	1.55508	1.79189	1.91907	2.00567	2.0753	2.17878	2.32227	2.49809	2.63761	2.69546	2.59528	2.43507	2.30935	2.23851	2.21053	2.14177	1.97585	1.78011	1.6189	1.58085
-0.602713	-0.804078	-0.979025	-1.10764	-1.08173	-0.859799	-0.561199	-0.336401	-0.277687	-0.367662	-0.486743	-0.581597	-0.573369	-0.516501	-0.454078	-0.465961	-0.540763	-0.61948	-0.620807	-0.5464	-0.434594	-0.240726	-0.0125904	0.295724	0.680105	1.12728	1.54503	1.88836	2.10716	2.18657	2.21342	2.23748	2.34209	2.45279	2.56187	2.5879	2.52993	2.38565	2.19663	2.1261	2.13598	2.20792	2.30959	2.32824	2.23736	2.1081	2.01981	1.9319	1.85318	1.72062
-0.239946	-0.127653	0.00392758	0.113351	0.138281	0.0609477	-0.126065	-0.335335	-0.490436	-0.519485	-0.393507	-0.178827	0.0219161	0.105692	0.0599955	-0.0427147	-0.1057	-0.0940688	-0.00194875	0.0439761	0.0281958	-0.0433742	-0.137807	-0.192395	-0.170763	-0.0971146	0.0339233	0.107915	0.15103	0.249475	0.414875	0.59243	0.763073	0.873669	0.967247	1.03357	1.06938	1.09502	1.05524	0.968679	0.817185	0.64889	0.504215	0.4249	0.440068	0.507244	0.646421	0.795079	0.946494	1.06756
-0.0772863	0.0362887	0.188803	0.290054	0.334119	0.346267	0.353537	0.321174	0.269178	0.166444	0.0406978	-0.0859121	-0.147118	-0.0511887	0.144895	0.342031	0.467288	0.518316	0.522533	0.551214	0.606862	0.668691	0.663354	0.584543	0.468103	0.34319	0.192806	0.0851828	0.0366782	0.0778324	0.203244	0.365257	0.629831	0.970861	1.34777	1.60793	1.70854	1.61659	1.47043	1.35649	1.36659	1.52805	1.76426	1.95537	2.0227	1.96513	1.82221	1.6874	1.59295	1.53051
-1.04879	-0.866075	-0.684047	-0.482329	-0.276515	-0.137091	-0.100653	-0.126982	-0.173046	-0.256439	-0.350058	-0.448585	-0.526219	-0.588437	-0.623612	-0.559027	-0.434764	-0.313816	-0.244735	-0.237112	-0.319236	-0.468969	-0.6744	-0.882103	-1.01754	-1.08296	-1.03109	-0.910543	-0.712751	-0.477083	-0.269202	-0.114927	0.0290668	0.19167	0.383552	0.619992	0.824376	0.895473	0.821232	0.688362	0.60326	0.687512	0.849034	1.09413	1.32155	1.51148	1.62486	1.72795	1.82918	1.9094
-0.234209	-0.197708	-0.103172	0.0782099	0.295702	0.529563	0.748334	0.894543	0.958805	0.96576	0.890923	0.801433	0.705757	0.627726	0.564943	0.497684	0.430617	0.355148	0.366017	0.427496	0.498826	0.527669	0.489411	0.434802	0.379872	0.355063	0.390882	0.448738	0.590053	0.892584	1.37959	1.90195	2.40087	2.80038	3.04565	3.09533	3.0214	2.84337	2.6243	2.45576	2.33901	2.2554	2.17015	2.07206	1.95617	1.85591	1.79566	1.71427	1.55608	1.38985
0.425309	0.475454	0.599342	0.673756	0.73281	0.735783	0.78584	0.882725	1.00992	1.15778	1.25994	1.26825	1.13906	0.960247	0.665797	0.374738	0.0956906	-0.072349	-0.110682	0.102607	0.516778	1.03142	1.54964	1.94377	2.17752	2.27076	2.33844	2.45326	2.69124	2.98906	3.32056	3.53409	3.60552	3.62241	3.71249	3.89758	4.15442	4.43266	4.65244	4.76057	4.77748	4.73409	4.71034	4.71446	4.68161	4.60207	4.52265	4.49172	4.49493	4.52132
0.425309	0.475454	0.599342	0.673756	0.73281	0.735783	0.78584	0.882725	1.00992	1.15778	1.25994	1.26825	1.13906	0.960247	0.665797	0.374738	0.0956906	-0.072349	-0.110682	0.102607	0.516778	1.03142	1.54964	1.94377	2.17752	2.27076	2.33844	2.45326	2.69124	2.98906	3.32056	3.53409	3.60552	3.62241	3.71249	3.89758	4.15442	4.43266	4.65244	4.76057	4.77748	4.73409	4.71034	4.71446	4.68161	4.60207	4.52265	4.49172	4.49493	4.52132
0.425309	0.475454	0.599342	0.673756	0.73281	0.735783	0.78584	0.882725	1.00992	1.15778	1.25994	1.26825	1.13906	0.960247	0.665797	0.374738	0.0956906	-0.072349	-0.110682	0.102607	0.516778	1.03142	1.54964	1.94377	2.17752	2.27076	2.33844	2.45326	2.69124	2.98906	3.32056	3.53409	3.60552	3.62241	3.71249	3.89758	4.15442	4.43266	4.65244	4.76057	4.77748	4.73409	4.71034	4.71446	4.68161	4.60207	4.52265	4.49172	4.49493	4.52132
0.508819	0.529453	0.502196	0.384878	0.171822	-0.105138	-0.405732	-0.680123	-0.828803	-0.914655	-0.895861	-0.725847	-0.402002	-0.0176848	0.297279	0.415008	0.36517	0.155584	-0.103129	-0.328692	-0.479766	-0.452572	-0.315976	-0.180511	-0.128805	-0.179102	-0.20539	-0.0935684	0.195577	0.568384	0.914868	1.16746	1.31992	1.37453	1.37229	1.34555	1.26809	1.21517	1.18916	1.13205	0.992883	0.738274	0.521472	0.468131	0.594535	0.750549	0.881203	0.931864	1.0017	1.08546
0.634062	0.794503	0.927294	1.01309	0.982823	0.801725	0.554779	0.339111	0.215374	0.166713	0.182136	0.224521	0.297501	0.378103	0.46165	0.482958	0.437831	0.330535	0.161996	-0.0255104	-0.187303	-0.313971	-0.387241	-0.424955	-0.445638	-0.416511	-0.324298	-0.0780562	0.230123	0.573514	0.82577	0.969058	1.08808	1.25571	1.4087	1.60333	1.80301	1.97849	2.14327	2.30968	2.47589	2.66411	2.80079	2.88779	2.87219	2.79775	2.67356	2.53086	2.30125	2.02086
1.32132	1.12061	0.975801	0.886683	0.820157	0.819753	0.854454	0.925593	1.01971	1.12615	1.24658	1.34518	1.32849	1.2397	1.13977	1.07431	1.04279	1.02774	1.1001	1.33421	1.66098	1.94709	2.18305	2.31948	2.41907	2.54499	2.76101	2.97238	3.14441	3.19087	3.18752	3.23578	3.34304	3.46255	3.53518	3.53977	3.55942	3.60356	3.64694	3.65249	3.64225	3.58826	3.46202	3.28561	3.06483	2.81896	2.5499	2.33824	2.27401	2.43276
0.863575	0.772965	0.715277	0.665827	0.646565	0.625427	0.682786	0.805312	0.931106	0.979074	0.974252	0.850777	0.567554	0.165106	-0.224035	-0.48166	-0.54611	-0.390486	-0.0776537	0.205094	0.418637	0.547854	0.617404	0.625684	0.599185	0.578222	0.534323	0.465708	0.408848	0.365077	0.348167	0.384958	0.54201	0.859688	1.18667	1.40843	1.48383	1.49905	1.45529	1.44762	1.5446	1.65573	1.64399	1.57032	1.49112	1.42818	1.46664	1.52135	1.60105	1.66201
-0.366628	-0.32212	-0.338785	-0.371091	-0.395906	-0.324659	-0.18386	-0.0218607	0.0859453	0.179021	0.2191	0.227691	0.1976	0.161129	0.158125	0.200519	0.350431	0.538252	0.741342	0.939459	1.14645	1.32525	1.52448	1.72078	1.95675	2.27153	2.55534	2.79647	2.87402	2.85407	2.78542	2.79634	2.8707	2.98237	3.06505	3.06205	3.08715	3.20138	3.41452	3.64186	3.86751	4.01055	3.99332	3.9199	3.76277	3.47065	3.01623	2.50991	2.02254	1.69233
-0.166114	-0.146612	-0.162571	-0.130444	-0.0474091	0.103588	0.26254	0.408134	0.460452	0.404911	0.269111	0.134568	0.0242108	0.0102547	0.129769	0.358147	0.650539	0.874256	0.974598	0.920016	0.763338	0.627415	0.592948	0.665673	0.781977	0.871695	0.889834	0.781484	0.669706	0.620359	0.689488	0.787923	0.969749	1.15144	1.37629	1.6076	1.83845	2.05415	2.16427	2.15145	2.06019	1.96198	1.88921	1.85462	1.82083	1.76531	1.72848	1.77981	1.88998	1.97503
-0.101334	-0.0335868	0.0473208	0.104621	0.130547	0.0784074	0.0075282	-0.0833868	-0.115301	-0.101878	-0.0571087	-0.0138161	0.0211309	0.0653196	0.108751	0.034009	-0.114805	-0.260741	-0.338415	-0.333749	-0.192211	0.0957741	0.465829	0.806286	1.05912	1.22236	1.36319	1.5816	1.91906	2.34933	2.77261	3.05454	3.12139	2.94727	2.67062	2.41779	2.28525	2.26053	2.33236	2.40098	2.44499	2.51113	2.54155	2.61571	2.71177	2.85172	2.97833	3.01907	2.92635	2.64743
1.0803	1.08171	1.07719	1.03021	0.908603	0.8099	0.732272	0.68238	0.654925	0.615039	0.608512	0.583985	0.530695	0.514975	0.517246	0.528044	0.530911	0.552127	0.549365	0.527177	0.474654	0.447592	0.442624	0.475478	0.496338	0.497576	0.48151	0.41464	0.409912	0.477676	0.577255	0.6974	0.729209	0.693088	0.667925	0.694967	0.770784	0.89105	0.972935	1.00523	1.00701	1.01658	1.09792	1.26226	1.41921	1.56326	1.59764	1.5637	1.47846	1.45085
-0.119247	-0.255347	-0.431499	-0.634474	-0.839065	-1.03811	-1.17352	-1.20459	-1.12448	-0.938312	-0.768107	-0.641499	-0.575022	-0.588666	-0.620018	-0.604651	-0.539891	-0.414267	-0.263495	-0.119205	-0.0450208	-0.0546016	-0.0343738	0.0587411	0.289678	0.61152	0.906735	1.11126	1.22656	1.26819	1.35231	1.45061	1.60334	1.72952	1.71784	1.5725	1.4145	1.36488	1.45756	1.65064	1.82229	1.89564	1.90503	1.88421	1.88435	1.9393	2.0931	2.35725	2.65441	2.94573
-0.587169	-0.677356	-0.773271	-0.837163	-0.769866	-0.527348	-0.106487	0.426246	0.92837	1.31411	1.52033	1.58695	1.52995	1.42407	1.30147	1.20693	1.12082	1.08316	1.06768	1.02573	1.02613	1.04226	1.1119	1.19189	1.2705	1.33014	1.30915	1.19556	1.06519	0.986526	0.977812	1.02749	1.13818	1.24665	1.33611	1.35911	1.35819	1.32823	1.27908	1.26392	1.28652	1.36386	1.43892	1.43731	1.36026	1.24553	1.15588	1.13882	1.15393	1.2082
-0.452949	-0.457906	-0.457435	-0.449036	-0.429926	-0.39602	-0.337646	-0.249747	-0.14638	-0.0431675	0.0313809	0.0642609	0.0540528	0.0141657	-0.048727	-0.125227	-0.21392	-0.318409	-0.430138	-0.536558	-0.611897	-0.649193	-0.651124	-0.638303	-0.630432	-0.636489	-0.657131	-0.688474	-0.727764	-0.763873	-0.798812	-0.836524	-0.884348	-0.941079	-1.00133	-1.05781	-1.11262	-1.16223	-1.21023	-1.24775	-1.27078	-1.28034	-1.27182	-1.24272	-1.18958	-1.10437	-0.980167	-0.82472	-0.654665	-0.489429
0.167996	0.118694	0.037973	-0.0868014	-0.240291	-0.406437	-0.536252	-0.588874	-0.515946	-0.307021	-0.00123737	0.322768	0.607521	0.830767	0.99489	1.11417	1.21497	1.32	1.42686	1.5175	1.58301	1.61696	1.62383	1.60763	1.58576	1.57145	1.56718	1.55828	1.54043	1.51537	1.48674	1.44484	1.37458	1.25438	1.06915	0.818422	0.517984	0.205254	-0.0766561	-0.310727	-0.488611	-0.600291	-0.656566	-0.683029	-0.704494	-0.736402	-0.768003	-0.786472	-0.774942	-0.719748
-1.14303	-1.17174	-1.19669	-1.23119	-1.27727	-1.33028	-1.37221	-1.36454	-1.26241	-1.04221	-0.664301	-0.163016	0.376722	0.826298	1.08273	1.13877	1.08894	1.0271	1.03158	1.14369	1.32717	1.5559	1.77919	1.95959	2.04007	2.00918	1.87419	1.68486	1.47748	1.28409	1.14642	1.06899	1.06911	1.10198	1.16151	1.16728	1.08038	0.911416	0.71428	0.51693	0.324803	0.139239	-0.0612281	-0.285202	-0.538819	-0.810626	-1.07937	-1.34764	-1.57714	-1.7484
-0.816997	-0.795468	-0.784279	-0.800396	-0.843461	-0.897826	-0.939121	-0.952929	-0.94513	-0.93384	-0.928358	-0.925849	-0.887326	-0.780194	-0.571496	-0.253047	0.16703	0.652841	1.14442	1.5889	1.92467	2.10945	2.11499	1.9548	1.68758	1.39007	1.12834	0.978891	0.940761	0.974871	1.01706	1.02329	0.968503	0.867049	0.715231	0.525037	0.309908	0.0791898	-0.148096	-0.34812	-0.525884	-0.680986	-0.852211	-1.05168	-1.25254	-1.40708	-1.45888	-1.38433	-1.18109	-0.90692
-0.744839	-0.714995	-0.680005	-0.63652	-0.607193	-0.595747	-0.604767	-0.603221	-0.566592	-0.488899	-0.340911	-0.0910516	0.318193	0.89349	1.57862	2.23885	2.74676	3.04846	3.13905	3.08341	2.95688	2.80695	2.65213	2.49095	2.30101	2.0889	1.88176	1.73227	1.67983	1.70204	1.75375	1.77839	1.73314	1.581	1.32723	0.984291	0.606556	0.254394	-0.0169938	-0.189966	-0.3083	-0.386214	-0.457481	-0.523426	-0.56486	-0.568564	-0.54813	-0.536052	-0.560793	-0.628805
-0.0383614	-0.099129	-0.106433	-0.00985294	0.134081	0.248323	0.200488	0.0714367	-0.143727	-0.337208	-0.40468	-0.392024	-0.328136	-0.288688	-0.246525	-0.19532	-0.212698	-0.310804	-0.375792	-0.384042	-0.268499	-0.0722562	0.194858	0.518784	0.838024	1.10566	1.34157	1.52297	1.68685	1.85555	2.07195	2.2792	2.44611	2.51925	2.50243	2.47903	2.41462	2.34881	2.29769	2.23013	2.22561	2.28328	2.35374	2.36987	2.31	2.15111	1.93417	1.74884	1.58825	1.429
1.217	1.1581	1.15671	1.19672	1.21231	1.1229	0.916267	0.661015	0.439991	0.277415	0.213428	0.229027	0.189842	0.106922	0.0168285	-0.0642446	-0.144578	-0.246763	-0.332552	-0.398703	-0.433055	-0.501377	-0.637352	-0.795361	-0.865876	-0.831698	-0.593052	-0.251918	0.101096	0.30452	0.345914	0.322018	0.320265	0.412829	0.571627	0.786831	1.02627	1.29256	1.56278	1.92171	2.25425	2.50816	2.62105	2.56989	2.43626	2.30789	2.2659	2.34581	2.50094	2.6795
-0.587292	-0.599275	-0.472727	-0.230179	0.0712388	0.314176	0.421744	0.387064	0.27483	0.168112	0.133027	0.173123	0.275715	0.452282	0.665093	0.89465	1.09556	1.19415	1.17176	1.03351	0.81827	0.580443	0.406373	0.333372	0.341366	0.389822	0.420504	0.432418	0.433399	0.479293	0.583049	0.774187	0.953149	1.05097	1.04554	0.980621	0.930437	0.929027	0.950925	1.01438	1.06564	1.13428	1.31855	1.56727	1.79786	1.9484	1.9664	1.89983	1.83509	1.82192
0.324216	0.355571	0.301467	0.211496	0.087696	-0.0457652	-0.115311	-0.0926734	0.0239541	0.219231	0.474419	0.700428	0.832337	0.862798	0.7827	0.646151	0.46432	0.312361	0.280023	0.300318	0.363938	0.43641	0.431724	0.30471	0.0128647	-0.300844	-0.528313	-0.580634	-0.433813	-0.164049	0.0703037	0.320421	0.620541	0.924522	1.20267	1.46525	1.62405	1.68612	1.66983	1.62421	1.4633	1.27946	1.07345	0.927156	0.88284	0.91947	1.11185	1.28482	1.4222	1.4849
1.53787	1.57282	1.6143	1.68051	1.69338	1.65896	1.59419	1.55086	1.49383	1.40835	1.27929	1.11676	0.948669	0.832296	0.728862	0.627091	0.489655	0.362398	0.31902	0.364199	0.41294	0.419378	0.399732	0.329179	0.278694	0.261167	0.245864	0.20044	0.0915197	-0.0402267	-0.159199	-0.221639	-0.183278	-0.0957838	0.0116474	0.10588	0.179899	0.175684	0.131835	0.0935545	0.0950881	0.176273	0.317566	0.506237	0.6392	0.672545	0.628438	0.545379	0.403405	0.252648
0.952459	1.0229	1.15625	1.29402	1.34752	1.29211	1.10517	0.873576	0.707222	0.663821	0.695305	0.719767	0.671785	0.617752	0.544602	0.452092	0.38517	0.392123	0.438369	0.556804	0.720401	0.834067	0.859617	0.776183	0.650666	0.441062	0.171768	-0.11168	-0.367334	-0.541081	-0.527953	-0.329312	0.0236574	0.458161	0.850973	1.16665	1.40886	1.62056	1.78476	1.91909	2.0342	2.14072	2.22726	2.37694	2.55586	2.80012	3.01424	3.11706	3.07979	2.84941
-1.15289	-1.11119	-0.931839	-0.681317	-0.419896	-0.263053	-0.202342	-0.216524	-0.185632	-0.122779	-0.0542383	0.00128539	0.0859393	0.212619	0.260838	0.204908	0.0608523	-0.138512	-0.296567	-0.427465	-0.499088	-0.526051	-0.504624	-0.429511	-0.329679	-0.23732	-0.259283	-0.337914	-0.434403	-0.497792	-0.486192	-0.331527	-0.112488	0.0486498	0.0114676	-0.149969	-0.355031	-0.44071	-0.36412	-0.0993891	0.228823	0.547446	0.834627	1.11101	1.33779	1.52376	1.62686	1.57101	1.37463	1.09938
1.31313	1.2442	1.07042	0.785984	0.451211	0.10055	-0.210969	-0.422423	-0.592177	-0.73118	-0.843296	-0.868218	-0.825184	-0.753541	-0.717239	-0.678185	-0.644307	-0.662935	-0.71198	-0.765297	-0.741406	-0.645459	-0.457249	-0.215723	-0.0209336	0.126462	0.274868	0.410895	0.492259	0.509253	0.403008	0.224017	0.0806084	0.140187	0.450863	0.842561	1.17838	1.39422	1.46723	1.46464	1.51979	1.61718	1.72575	1.82045	1.89657	1.95466	2.01842	2.05562	2.07729	2.02111
0.239863	0.303638	0.388393	0.474047	0.548897	0.589698	0.614439	0.665886	0.780573	1.01708	1.33023	1.60484	1.80481	1.93506	2.02236	2.02631	1.9117	1.65624	1.3478	1.14084	1.13269	1.33071	1.62057	1.89459	2.07187	2.15319	2.2225	2.26348	2.32903	2.41259	2.50689	2.60446	2.70794	2.8123	2.8631	2.84671	2.77368	2.70199	2.56795	2.44964	2.38394	2.39127	2.43951	2.46542	2.44586	2.4047	2.36903	2.32459	2.27479	2.17872
0.224797	0.292774	0.369847	0.407951	0.419142	0.384309	0.348502	0.296417	0.229645	0.188163	0.146218	0.0877034	-0.0393773	-0.251314	-0.497596	-0.708811	-0.835356	-0.865156	-0.789002	-0.669104	-0.549749	-0.414827	-0.329312	-0.34467	-0.480066	-0.672231	-0.834584	-0.862789	-0.759539	-0.584229	-0.446726	-0.359916	-0.276989	-0.143278	0.0835094	0.402891	0.751281	1.04405	1.26511	1.37796	1.47169	1.56014	1.68893	1.78814	1.79651	1.78147	1.78105	1.7839	1.73352	1.59897
-0.66947	-0.563931	-0.495971	-0.489767	-0.494623	-0.42769	-0.236833	0.00557219	0.22905	0.340894	0.403762	0.509948	0.682529	0.827011	0.920715	0.860984	0.643983	0.308626	-0.0314985	-0.350412	-0.561607	-0.701691	-0.811562	-0.881526	-0.928126	-0.842547	-0.656177	-0.379504	-0.130008	0.0338961	0.0605541	-0.00690152	-0.0984605	-0.167414	-0.171318	-0.138979	-0.0291404	0.108538	0.286794	0.480588	0.697323	0.907773	1.02624	1.16682	1.26854	1.31125	1.33974	1.39543	1.48862	1.59727
1.54392	1.35377	1.1267	1.02347	1.09846	1.28293	1.45831	1.59194	1.65751	1.72564	1.8097	1.90337	1.94774	1.90972	1.79871	1.69008	1.67413	1.72917	1.79276	1.84068	1.75148	1.55973	1.27353	1.01253	0.876595	0.873873	0.919859	0.989437	1.01578	1.01451	0.953527	0.876029	0.84405	0.804896	0.81308	0.925438	1.08828	1.25018	1.44022	1.67492	1.89237	2.06317	2.1618	2.2169	2.22384	2.18419	2.12072	2.06836	1.99248	1.92791
1.54392	1.35377	1.1267	1.02347	1.09846	1.28293	1.45831	1.59194	1.65751	1.72564	1.8097	1.90337	1.94774	1.90972	1.79871	1.69008	1.67413	1.72917	1.79276	1.84068	1.75148	1.55973	1.27353	1.01253	0.876595	0.873873	0.919859	0.989437	1.01578	1.01451	0.953527	0.876029	0.84405	0.804896	0.81308	0.925438	1.08828	1.25018	1.44022	1.67492	1.89237	2.06317	2.1618	2.2169	2.22384	2.18419	2.12072	2.06836	1.99248	1.92791
0.388577	0.255803	0.215549	0.200123	0.223848	0.248191	0.280973	0.359508	0.498603	0.646551	0.776755	0.83326	0.826789	0.720801	0.599124	0.4894	0.447913	0.507006	0.621614	0.742193	0.84708	0.952853	0.975042	0.953469	0.849939	0.717353	0.598045	0.569509	0.60868	0.672275	0.744966	0.9085	1.14156	1.45915	1.82136	2.08229	2.20064	2.20431	2.19345	2.29597	2.45897	2.64761	2.7052	2.61269	2.43383	2.29571	2.3061	2.40561	2.49765	2.60001
-0.732309	-0.843382	-0.970594	-1.05433	-1.01371	-0.861711	-0.584945	-0.256666	0.0566651	0.335264	0.611317	0.830693	0.975664	1.04615	0.932206	0.692911	0.350077	0.0608509	-0.07072	-0.0747391	-0.0481968	-0.0419604	-0.131869	-0.268189	-0.36778	-0.410898	-0.315709	-0.0954973	0.183073	0.502327	0.766319	0.983287	1.0394	0.993119	0.819957	0.689116	0.672888	0.951391	1.3375	1.677	1.87771	1.87171	1.82276	1.69576	1.51902	1.29736	1.09266	0.946411	0.856176	0.891579
0.771893	0.794169	0.713394	0.59115	0.439722	0.312244	0.222902	0.187262	0.212269	0.290932	0.448147	0.612645	0.723436	0.686241	0.495077	0.205469	-0.0483565	-0.176265	-0.188579	-0.110732	-0.0359038	-0.0104775	-0.0742742	-0.150267	-0.206918	-0.213785	-0.122165	0.0566623	0.164284	0.144088	0.0232714	-0.0136462	0.0616522	0.300301	0.553314	0.703341	0.726586	0.792461	0.958491	1.2296	1.44109	1.56636	1.58843	1.56747	1.62666	1.77053	1.89144	1.99012	2.05164	2.07794
-0.382618	-0.417588	-0.388954	-0.332194	-0.282023	-0.263174	-0.314185	-0.383764	-0.438263	-0.416063	-0.29354	-0.176149	-0.104118	-0.102758	-0.119767	-0.170889	-0.19394	-0.175391	-0.0841411	-0.00318289	-0.0310703	-0.0595162	-0.0927725	-0.0856813	-0.0925335	-0.124325	-0.197525	-0.203139	-0.176793	-0.108987	-0.0046731	0.103932	0.193923	0.291448	0.511987	0.797655	1.19916	1.59753	1.9707	2.22467	2.35231	2.41007	2.45157	2.57919	2.75181	2.92524	3.01036	2.98845	2.88583	2.70376
0.427101	0.461981	0.532577	0.576324	0.590455	0.55146	0.489612	0.426428	0.37395	0.328944	0.309613	0.340851	0.406959	0.515129	0.613237	0.6553	0.610948	0.512684	0.377355	0.230399	0.0939422	-0.0369208	-0.13239	-0.141172	-0.124435	-0.112149	-0.128929	-0.164472	-0.179265	-0.161553	-0.146004	-0.101541	-0.0520699	-0.0236074	-0.00734888	0.0072601	0.0466806	0.0859788	0.125572	0.10159	0.0578849	-0.00512802	-0.0903987	-0.133331	-0.159877	-0.165306	-0.150388	-0.127679	-0.102273	-0.108516
2.16589	2.11483	2.08742	2.09309	2.11325	2.10367	2.09003	2.06398	2.00552	1.97487	1.99658	2.08746	2.16287	2.20146	2.12507	1.97752	1.82966	1.71111	1.62084	1.52116	1.34751	1.18692	1.03166	0.941154	0.876186	0.839928	0.797602	0.806706	0.852565	0.953036	1.09999	1.20475	1.2742	1.33603	1.43729	1.53147	1.60747	1.65602	1.64782	1.65903	1.63735	1.62332	1.6289	1.61822	1.65784	1.72844	1.79016	1.84814	1.87489	1.84597
1.22452	1.12269	0.999885	0.88151	0.77213	0.683943	0.616628	0.612446	0.681012	0.767403	0.869145	0.932398	0.954775	0.899022	0.768525	0.664339	0.622408	0.691499	0.886282	1.10914	1.32684	1.41539	1.37855	1.2854	1.25655	1.30742	1.46549	1.66476	1.84735	1.94579	1.92109	1.85353	1.81485	1.80021	1.83958	1.90962	2.00102	2.12327	2.22933	2.30089	2.32383	2.35398	2.42257	2.47042	2.49793	2.524	2.49803	2.43466	2.34435	2.18727
-0.164532	-0.110453	-0.165312	-0.19193	-0.201169	-0.188611	-0.140746	-0.0834637	-0.0842126	-0.149306	-0.305025	-0.506532	-0.665656	-0.808498	-0.968841	-1.11675	-1.22733	-1.17929	-0.988141	-0.723749	-0.392654	-0.0639283	0.245216	0.559483	0.807244	1.0944	1.4872	1.92164	2.30323	2.52812	2.60945	2.63136	2.58014	2.51417	2.467	2.39652	2.36238	2.3125	2.28372	2.24659	2.24686	2.27108	2.34471	2.31368	2.21375	2.15556	2.18459	2.33784	2.47854	2.52674
1.14563	1.08684	0.99296	0.82262	0.598456	0.279799	-0.0488425	-0.275784	-0.361311	-0.310382	-0.190615	-0.0803085	-0.11164	-0.258898	-0.466806	-0.607248	-0.603223	-0.476305	-0.293502	-0.113572	0.0433928	0.136112	0.0959551	0.00750844	-0.0218517	0.0291573	0.179898	0.404712	0.604932	0.690976	0.626605	0.49088	0.301711	0.101363	0.033089	0.0824627	0.246205	0.439133	0.654626	0.782462	0.865628	0.908283	0.919258	0.914777	0.988784	1.11381	1.28584	1.45226	1.52981	1.49465
-0.152073	-0.104483	-0.0228973	0.0757519	0.108575	0.0297186	-0.199281	-0.430704	-0.581982	-0.547718	-0.399336	-0.218388	-0.107725	-0.0907279	-0.192138	-0.345974	-0.458303	-0.53873	-0.515779	-0.507812	-0.421596	-0.330891	-0.228316	-0.10681	-0.0336639	0.0232848	0.0220688	0.0375641	0.0988526	0.227391	0.410361	0.640191	0.8096	0.925657	1.01706	1.12907	1.31835	1.56557	1.85333	2.01584	2.06579	2.09238	2.15242	2.23859	2.34628	2.42108	2.40745	2.26209	1.99537	1.67555
0.331058	0.487758	0.689038	0.889945	1.06202	1.20402	1.27121	1.2248	1.0887	0.921477	0.732601	0.615407	0.553193	0.52183	0.409917	0.292608	0.214742	0.207015	0.331794	0.588813	0.910917	1.23182	1.44494	1.54382	1.57341	1.50648	1.51244	1.59786	1.77929	1.9696	2.14262	2.29268	2.4647	2.58276	2.58983	2.41656	2.1184	1.87117	1.76071	1.82394	1.99104	2.10672	2.15102	2.19166	2.22041	2.1899	2.06375	1.82702	1.54042	1.27328
0.279429	0.252435	0.198588	0.0821424	-0.0330128	-0.078032	-0.0155755	0.11344	0.264789	0.264092	0.12084	-0.0520782	-0.137063	-0.0524952	0.184733	0.510437	0.716806	0.778185	0.689989	0.568167	0.478065	0.420048	0.305206	0.140757	-0.0735213	-0.326807	-0.498598	-0.516507	-0.450071	-0.275791	-0.072316	0.141457	0.341659	0.514012	0.676051	0.828863	1.02191	1.26321	1.5862	1.86902	2.04279	2.07222	1.95501	1.83201	1.81488	1.90303	1.84211	1.66697	1.34136	1.05281
-0.583078	-0.583668	-0.572946	-0.527821	-0.491423	-0.510578	-0.601734	-0.759942	-0.869618	-0.938471	-0.94311	-0.883501	-0.805913	-0.726427	-0.704316	-0.758421	-0.882911	-1.021	-1.11229	-1.09204	-1.04068	-0.938238	-0.840935	-0.764197	-0.728346	-0.710643	-0.738643	-0.719728	-0.613085	-0.404062	-0.160469	0.104161	0.384871	0.660277	0.951463	1.22638	1.40849	1.47483	1.5235	1.57368	1.68255	1.78606	1.9175	2.03818	2.10572	2.16621	2.20112	2.19212	2.13811	2.04977
-0.583078	-0.583668	-0.572946	-0.527821	-0.491423	-0.510578	-0.601734	-0.759942	-0.869618	-0.938471	-0.94311	-0.883501	-0.805913	-0.726427	-0.704316	-0.758421	-0.882911	-1.021	-1.11229	-1.09204	-1.04068	-0.938238	-0.840935	-0.764197	-0.728346	-0.710643	-0.738643	-0.719728	-0.613085	-0.404062	-0.160469	0.104161	0.384871	0.660277	0.951463	1.22638	1.40849	1.47483	1.5235	1.57368	1.68255	1.78606	1.9175	2.03818	2.10572	2.16621	2.20112	2.19212	2.13811	2.04977
1.86879	1.77978	1.65183	1.54393	1.44141	1.34962	1.26849	1.18476	1.09103	0.980867	0.814102	0.695661	0.574774	0.567326	0.672285	0.889363	1.16637	1.41016	1.44284	1.27448	0.971614	0.632053	0.413181	0.311491	0.395183	0.629961	0.980176	1.40474	1.7902	2.08981	2.20836	2.25731	2.21202	2.14676	2.13176	2.18837	2.34223	2.52841	2.73818	2.94488	3.12256	3.19801	3.26495	3.31759	3.30078	3.16355	2.96755	2.85676	2.83074	2.97455
-1.05204	-0.924473	-0.751396	-0.54707	-0.373582	-0.190642	-0.0191524	0.192472	0.303125	0.210052	-0.0885374	-0.553272	-0.997747	-1.34899	-1.4619	-1.28856	-0.930661	-0.568399	-0.277272	-0.0992295	-0.0284047	0.00665839	0.0319329	0.0845079	0.118922	0.0927719	0.0393567	-0.0871702	-0.175222	-0.150253	-0.0323388	0.269593	0.680919	1.09211	1.35242	1.46931	1.44868	1.43847	1.50836	1.66003	1.92353	2.16668	2.32527	2.38368	2.45446	2.60086	2.82077	3.09311	3.46371	3.80777
1.13814	1.05703	0.933982	0.792159	0.600059	0.40112	0.203606	0.0843131	0.0339838	0.0624911	0.102198	0.168226	0.221927	0.24271	0.227122	0.205979	0.224673	0.288748	0.378386	0.465996	0.52139	0.530686	0.550972	0.637286	0.797373	0.992282	1.18751	1.34448	1.44626	1.51204	1.57512	1.61019	1.61441	1.60145	1.61475	1.6787	1.76629	1.85168	1.92515	1.96791	1.99009	2.03992	2.08344	2.14964	2.18905	2.17878	2.1183	2.04861	1.89859	1.68222
0.77574	0.701241	0.589686	0.450418	0.294396	0.150393	0.0479722	-0.000465179	-0.00278424	0.013601	0.0349963	0.048442	0.0640735	0.0772682	0.0804008	0.0671518	0.0389039	0.00100853	-0.0300045	-0.0435411	-0.0435578	-0.0235674	0.0044374	0.0538543	0.151679	0.304915	0.506435	0.731157	0.953078	1.15791	1.34247	1.49482	1.60382	1.65065	1.6221	1.52244	1.34561	1.10652	0.816566	0.521582	0.262057	0.0722405	-0.0409849	-0.0995453	-0.124326	-0.140998	-0.16444	-0.195752	-0.260058	-0.382261
2.12271	2.17352	2.21671	2.24981	2.26404	2.26665	2.27254	2.27846	2.27718	2.24027	2.15516	1.98599	1.71282	1.35925	0.967611	0.607616	0.313809	0.127754	0.0489427	0.0583327	0.138162	0.27381	0.460246	0.67948	0.879919	1.06689	1.22192	1.34224	1.4296	1.44278	1.4003	1.3235	1.21878	1.10649	0.958499	0.755143	0.504089	0.228037	-0.0508155	-0.329477	-0.632098	-0.974247	-1.35217	-1.71648	-2.04311	-2.30798	-2.49312	-2.59428	-2.62558	-2.62462
-1.07434	-1.10101	-1.13458	-1.173	-1.22048	-1.25754	-1.27872	-1.27421	-1.25653	-1.23719	-1.22582	-1.22831	-1.25516	-1.29856	-1.33793	-1.35487	-1.31056	-1.19276	-0.996725	-0.724121	-0.39075	-0.0192294	0.366147	0.730612	1.04444	1.28433	1.45407	1.56087	1.62912	1.65758	1.64381	1.57923	1.46817	1.3339	1.19199	1.03597	0.861725	0.657359	0.42198	0.171312	-0.0679821	-0.267007	-0.401795	-0.4806	-0.511206	-0.514382	-0.50635	-0.501888	-0.500041	-0.490709
-0.766855	-0.618578	-0.455582	-0.288234	-0.129629	-0.00741928	0.0493041	0.0194811	-0.080699	-0.202719	-0.283429	-0.273844	-0.182257	-0.0454494	0.0957919	0.217094	0.332221	0.453807	0.598691	0.78329	1.02834	1.34229	1.70687	2.05958	2.31707	2.44822	2.46441	2.40289	2.31736	2.24252	2.19298	2.15019	2.08939	1.98938	1.83503	1.59074	1.26459	0.872388	0.463571	0.090313	-0.207149	-0.4047	-0.511896	-0.505951	-0.384972	-0.130758	0.221394	0.610347	0.970858	1.26504
1.78138	1.75999	1.73454	1.70793	1.70485	1.73607	1.78921	1.83022	1.82367	1.75465	1.63149	1.48883	1.33906	1.20565	1.0875	0.982672	0.895948	0.826161	0.762578	0.697537	0.617143	0.522929	0.398426	0.242175	0.079365	-0.0478384	-0.103831	-0.05597	0.0832943	0.282437	0.49258	0.65419	0.739729	0.738964	0.664415	0.537985	0.372824	0.193381	0.0345122	-0.0823353	-0.127875	-0.133143	-0.124667	-0.126054	-0.134502	-0.113719	-0.0344053	0.0969619	0.260545	0.41017
0.347477	0.323821	0.308366	0.29332	0.275302	0.258113	0.236948	0.240605	0.292416	0.409752	0.569683	0.749989	0.925296	1.08334	1.21854	1.31359	1.35314	1.3055	1.17525	0.999519	0.836792	0.731117	0.685312	0.657824	0.618392	0.554459	0.480221	0.405857	0.336602	0.264474	0.1778	0.0670796	-0.0664913	-0.215232	-0.378963	-0.521078	-0.613453	-0.634583	-0.60281	-0.551313	-0.540679	-0.580503	-0.657373	-0.733801	-0.800259	-0.83322	-0.836669	-0.830083	-0.828092	-0.819358
1.09311	1.04313	1.00742	0.989215	1.00322	1.05646	1.12915	1.20505	1.253	1.26016	1.22285	1.16643	1.11734	1.10026	1.10948	1.12851	1.14946	1.16128	1.17083	1.15525	1.13656	1.12937	1.12954	1.17508	1.29528	1.48422	1.73835	2.0298	2.32338	2.58941	2.80787	2.96986	3.07775	3.13301	3.13039	3.07035	2.94339	2.74958	2.48805	2.18121	1.84459	1.51411	1.22147	0.995601	0.846966	0.78653	0.789506	0.816913	0.838732	0.838111
0.333189	0.306202	0.25637	0.192066	0.107325	0.020393	-0.0597507	-0.127236	-0.17271	-0.195976	-0.210478	-0.229089	-0.253742	-0.28223	-0.297792	-0.290016	-0.224996	-0.0934393	0.114292	0.372277	0.637928	0.872542	1.06515	1.22266	1.40199	1.6086	1.81099	1.97632	2.07471	2.12594	2.16939	2.22521	2.28774	2.30751	2.23797	2.06295	1.79391	1.4456	1.06233	0.684428	0.343105	0.068808	-0.123393	-0.206438	-0.151838	0.0441213	0.364186	0.754786	1.13017	1.44342
0.333189	0.306202	0.25637	0.192066	0.107325	0.020393	-0.0597507	-0.127236	-0.17271	-0.195976	-0.210478	-0.229089	-0.253742	-0.28223	-0.297792	-0.290016	-0.224996	-0.0934393	0.114292	0.372277	0.637928	0.872542	1.06515	1.22266	1.40199	1.6086	1.81099	1.97632	2.07471	2.12594	2.16939	2.22521	2.28774	2.30751	2.23797	2.06295	1.79391	1.4456	1.06233	0.684428	0.343105	0.068808	-0.123393	-0.206438	-0.151838	0.0441213	0.364186	0.754786	1.13017	1.44342
-0.369938	-0.334652	-0.265747	-0.219862	-0.20915	-0.212534	-0.243296	-0.239374	-0.209111	-0.179819	-0.17115	-0.227695	-0.308958	-0.434284	-0.559727	-0.617444	-0.676029	-0.716063	-0.788664	-0.816491	-0.769341	-0.643921	-0.472759	-0.305523	-0.17445	-0.132612	-0.135238	-0.131427	-0.0691403	0.0228516	0.107752	0.135589	0.125274	0.122873	0.146781	0.177431	0.204658	0.153362	0.077799	0.0493984	0.119746	0.287318	0.504786	0.718412	0.858964	0.856201	0.715182	0.487298	0.17993	-0.0985939
0.632765	0.783023	0.96937	1.07346	1.03389	0.782175	0.441012	0.166616	0.0809198	0.141143	0.251842	0.339407	0.366189	0.340816	0.237653	0.14504	0.120061	0.157961	0.232813	0.282043	0.265948	0.18767	0.0869699	0.0490961	0.0567437	0.0917602	0.116109	0.089728	-0.00348413	-0.172148	-0.344848	-0.455425	-0.481059	-0.413917	-0.321573	-0.248211	-0.280169	-0.363553	-0.436893	-0.420083	-0.265593	0.014742	0.404568	0.798788	1.11164	1.25049	1.1435	0.832913	0.501466	0.270182
-0.546451	-0.285754	-0.0378891	0.168985	0.242064	0.15088	-0.058432	-0.230664	-0.278296	-0.234566	-0.118109	-0.0717502	-0.0891956	-0.166819	-0.241188	-0.197562	-0.0549453	0.142196	0.297846	0.346332	0.257004	0.0996545	-0.110277	-0.246917	-0.281685	-0.236021	-0.133797	-0.0528031	-0.00723681	-0.00958915	-0.068665	-0.129099	-0.154015	-0.126745	-0.0213604	0.101589	0.138027	0.0804885	-0.0516561	-0.200135	-0.284811	-0.271293	-0.210316	-0.159203	-0.181359	-0.266972	-0.382418	-0.453726	-0.416004	-0.371346
0.190544	0.18757	0.211866	0.233073	0.234337	0.189374	0.0892748	-0.0745046	-0.225536	-0.268294	-0.231624	-0.116153	0.0684295	0.310924	0.598417	0.883029	1.08643	1.19131	1.18933	1.06176	0.911744	0.785628	0.725758	0.729912	0.746363	0.680327	0.583427	0.489617	0.370682	0.307539	0.276388	0.269274	0.311289	0.337017	0.305138	0.201921	0.0600908	-0.014882	-0.0531492	-0.0913437	-0.132368	-0.132881	-0.0637019	0.0444161	0.158907	0.226983	0.213546	0.147477	0.052149	-0.0453169
-0.592512	-0.633357	-0.682862	-0.698452	-0.66713	-0.622887	-0.624663	-0.693587	-0.813724	-0.911646	-0.955114	-0.960866	-0.961095	-0.976015	-1.00041	-1.01249	-0.988374	-0.962522	-0.896608	-0.880721	-0.970926	-1.13594	-1.33603	-1.47841	-1.53769	-1.52057	-1.44716	-1.35579	-1.27761	-1.2383	-1.23342	-1.18984	-1.06862	-0.904759	-0.719213	-0.566641	-0.44738	-0.359915	-0.334671	-0.380016	-0.521578	-0.738239	-1.02615	-1.22336	-1.27736	-1.20941	-1.0899	-1.01645	-1.06028	-1.13492
0.359279	0.504136	0.652896	0.756926	0.814172	0.883291	0.944112	0.983744	0.972148	0.893973	0.832944	0.773873	0.770067	0.826122	0.904651	0.899694	0.810664	0.583996	0.358142	0.0891126	-0.139257	-0.223787	-0.131707	0.0938362	0.39898	0.652559	0.794938	0.816974	0.839322	0.867248	0.919138	0.962973	0.944958	0.827816	0.678787	0.498996	0.389651	0.356199	0.387099	0.495315	0.615958	0.732848	0.804878	0.770266	0.595556	0.354557	0.0836707	-0.164566	-0.306835	-0.32867
0.359279	0.504136	0.652896	0.756926	0.814172	0.883291	0.944112	0.983744	0.972148	0.893973	0.832944	0.773873	0.770067	0.826122	0.904651	0.899694	0.810664	0.583996	0.358142	0.0891126	-0.139257	-0.223787	-0.131707	0.0938362	0.39898	0.652559	0.794938	0.816974	0.839322	0.867248	0.919138	0.962973	0.944958	0.827816	0.678787	0.498996	0.389651	0.356199	0.387099	0.495315	0.615958	0.732848	0.804878	0.770266	0.595556	0.354557	0.0836707	-0.164566	-0.306835	-0.32867
0.707457	0.787027	0.834528	0.87575	0.956605	1.06194	1.17687	1.23593	1.18148	1.04299	0.907939	0.835738	0.844966	0.903922	0.963363	1.02133	1.06753	1.09082	1.07133	1.05517	1.06197	1.11517	1.20802	1.25289	1.26819	1.19331	1.09587	1.00539	0.893575	0.742242	0.543692	0.310475	0.100785	-0.0554224	-0.128543	-0.186056	-0.243251	-0.297895	-0.377494	-0.443998	-0.576621	-0.782258	-0.980444	-1.07977	-0.990665	-0.749572	-0.474899	-0.281774	-0.229308	-0.314632
-0.823932	-0.483671	-0.11005	0.286548	0.635114	0.847755	0.935617	0.8976	0.807272	0.743695	0.774137	0.860398	0.921008	0.944258	0.921493	0.883299	0.879019	0.887672	0.869461	0.82778	0.717052	0.5786	0.411703	0.28428	0.174341	0.0959686	0.0804157	0.170827	0.275831	0.299975	0.268442	0.296995	0.479361	0.756028	1.04808	1.30862	1.43666	1.41682	1.28705	1.08619	0.898738	0.722951	0.667754	0.681203	0.722737	0.755587	0.705392	0.580055	0.408888	0.270976
-0.715517	-0.731915	-0.737746	-0.680968	-0.513188	-0.256624	0.0411835	0.351445	0.617515	0.762144	0.818721	0.806545	0.768899	0.72236	0.643716	0.576794	0.546853	0.56013	0.59706	0.654865	0.720653	0.774817	0.79383	0.734594	0.547616	0.313346	0.0496924	-0.134837	-0.235352	-0.226733	-0.159783	-0.0374015	0.0241356	-0.00535025	-0.130558	-0.302898	-0.399525	-0.333184	-0.0987785	0.147555	0.244971	0.118565	-0.100233	-0.357209	-0.538099	-0.65007	-0.685587	-0.602361	-0.397069	-0.108303
-0.773755	-0.598937	-0.334117	0.0186199	0.313177	0.504155	0.576317	0.533522	0.460471	0.365467	0.307055	0.311283	0.369743	0.428953	0.535677	0.617374	0.629857	0.519309	0.374241	0.23468	0.112757	0.00375662	-0.00389833	0.114476	0.279768	0.395992	0.413033	0.383667	0.218218	-0.00589065	-0.205751	-0.279621	-0.215061	0.00939495	0.331808	0.630855	0.807319	0.842932	0.770154	0.661154	0.621567	0.675093	0.746925	0.792121	0.788601	0.747332	0.698681	0.625077	0.593824	0.601036
-0.1532	-0.417661	-0.622711	-0.713761	-0.678565	-0.487829	-0.245097	0.0263649	0.273655	0.493309	0.700122	0.930556	1.11176	1.1641	1.0548	0.90296	0.821119	0.799467	0.82246	0.780528	0.73272	0.736116	0.771843	0.860759	0.934119	0.940694	0.835742	0.620085	0.342433	0.146069	0.165755	0.369777	0.662783	0.955038	1.20949	1.41973	1.59091	1.60285	1.50986	1.24418	0.832206	0.39833	-0.000490446	-0.299747	-0.451376	-0.432272	-0.293914	-0.161411	-0.101106	0.0439827
0.903354	0.845513	0.73983	0.540143	0.348939	0.262778	0.344757	0.583112	0.883404	1.20973	1.54343	1.76453	1.87357	1.90552	1.82179	1.63105	1.38641	1.14414	0.888922	0.655206	0.506664	0.446075	0.44043	0.462115	0.560069	0.672657	0.733918	0.736283	0.664759	0.516816	0.290317	0.0959477	0.0212954	0.101307	0.272447	0.429598	0.483272	0.459546	0.418163	0.403111	0.396918	0.403106	0.407642	0.465783	0.642013	0.859559	0.975001	0.938611	0.72263	0.497712
-0.768283	-0.745743	-0.696224	-0.634572	-0.559475	-0.478045	-0.393093	-0.31405	-0.200502	-0.0833903	0.0427136	0.093144	0.0743392	-0.00891692	-0.160422	-0.30763	-0.400574	-0.418132	-0.358662	-0.265776	-0.193367	-0.173336	-0.204219	-0.287804	-0.430838	-0.580341	-0.691133	-0.729414	-0.732968	-0.736467	-0.747228	-0.735187	-0.74691	-0.785371	-0.870391	-0.939189	-0.978328	-0.9897	-0.919905	-0.818245	-0.708453	-0.582537	-0.46946	-0.427006	-0.439403	-0.50079	-0.54136	-0.56424	-0.62399	-0.710228
-0.779952	-0.589602	-0.466314	-0.440939	-0.529244	-0.739624	-0.989693	-1.26543	-1.47807	-1.5392	-1.38024	-1.03656	-0.641274	-0.396679	-0.344357	-0.381889	-0.430287	-0.354304	-0.233343	-0.0896712	0.0321759	0.1378	0.231591	0.275176	0.174581	-0.140081	-0.561304	-0.976347	-1.21362	-1.28109	-1.20995	-1.05492	-0.879327	-0.788936	-0.762989	-0.768744	-0.746422	-0.765599	-0.734424	-0.632083	-0.449839	-0.22495	-0.0328994	0.0807639	0.0877591	0.0361105	-0.0540736	-0.104949	-0.103687	-0.0970849
2.25109	2.34456	2.33813	2.1708	1.85622	1.40675	0.935763	0.555148	0.318576	0.175109	0.0831916	-0.0431991	-0.140345	-0.195051	-0.174334	-0.0419434	0.136365	0.322056	0.42977	0.476482	0.458555	0.46695	0.489348	0.491151	0.39762	0.200372	-0.0308971	-0.32414	-0.519247	-0.609067	-0.558244	-0.401691	-0.203808	-0.0647755	-0.0695172	-0.23216	-0.459525	-0.608934	-0.645989	-0.620391	-0.609739	-0.548945	-0.46021	-0.346382	-0.180422	0.0145206	0.26091	0.424664	0.461302	0.343867
0.0865805	0.153811	0.209466	0.168992	0.0526307	-0.0536387	-0.137658	-0.139016	-0.095578	-0.107276	-0.211997	-0.408644	-0.590175	-0.71988	-0.834532	-1.05922	-1.33826	-1.56519	-1.6726	-1.62083	-1.45262	-1.2315	-1.018	-0.802582	-0.683406	-0.655607	-0.771459	-0.964808	-1.13889	-1.16676	-1.10215	-0.969592	-0.851354	-0.814745	-0.882831	-0.9954	-1.0924	-1.11954	-1.10331	-1.07946	-1.06158	-1.14317	-1.37808	-1.67577	-1.90408	-1.95211	-1.79675	-1.47174	-1.11474	-0.83641
-0.699288	-0.604696	-0.490233	-0.364603	-0.289842	-0.281861	-0.310146	-0.359253	-0.317285	-0.212831	-0.00812022	0.217589	0.388186	0.463731	0.468602	0.400076	0.307738	0.207307	0.130733	0.0903901	0.0564342	0.0655855	0.0442448	-0.0482076	-0.173031	-0.219802	-0.218006	-0.108802	-0.020324	0.0221972	0.00622304	-0.0596063	-0.093452	-0.0545791	0.107644	0.294654	0.451025	0.449351	0.309127	0.0920201	-0.140811	-0.393087	-0.623178	-0.79153	-0.77865	-0.57784	-0.303853	-0.118594	-0.0935415	-0.207848
0.123384	-0.00513815	-0.180517	-0.283413	-0.331177	-0.336197	-0.33408	-0.392295	-0.490001	-0.572417	-0.636779	-0.657042	-0.703349	-0.752016	-0.753523	-0.674516	-0.533943	-0.32681	-0.065985	0.0884175	0.167854	0.178482	0.103594	-0.00641574	-0.082072	-0.0718206	-0.0113616	0.0659328	0.156622	0.227059	0.234857	0.15316	0.00225589	-0.226514	-0.41651	-0.445406	-0.309367	-0.071246	0.143623	0.251193	0.194586	0.088609	-0.0237976	0.000696541	0.0577825	0.0899907	0.0471712	-0.0786116	-0.212613	-0.353236
-0.120197	-0.123572	-0.103751	-0.0887699	-0.0284644	0.0606013	0.187671	0.302131	0.382362	0.42796	0.490255	0.560595	0.590376	0.519124	0.378328	0.28158	0.273518	0.416483	0.567769	0.749042	0.831137	0.82819	0.783998	0.69154	0.526262	0.340607	0.149997	-0.00261895	-0.101542	-0.199346	-0.278851	-0.398961	-0.55546	-0.597475	-0.580721	-0.460201	-0.278579	-0.139238	-0.0782328	-0.100603	-0.224944	-0.353106	-0.417365	-0.412782	-0.338114	-0.313202	-0.425865	-0.717042	-1.10944	-1.43305
0.10735	0.13925	0.243833	0.380216	0.498255	0.544158	0.48684	0.381321	0.252867	0.0968794	-0.0517757	-0.183154	-0.290185	-0.348627	-0.339416	-0.22066	-0.0390297	0.176451	0.355894	0.463458	0.47658	0.379583	0.251206	0.123962	0.0299783	-0.0666728	-0.118681	-0.172503	-0.232437	-0.320283	-0.415552	-0.518279	-0.554351	-0.467001	-0.271613	0.0411691	0.34568	0.61571	0.842826	0.962491	0.957587	0.898978	0.834741	0.812013	0.834252	0.882635	0.879439	0.843388	0.713187	0.553958
0.0896082	-0.0635717	-0.232727	-0.404541	-0.618814	-0.83118	-1.03655	-1.20852	-1.34024	-1.43796	-1.49646	-1.53076	-1.4808	-1.32595	-1.14227	-1.02776	-0.969426	-0.981523	-1.0052	-0.993744	-0.92225	-0.805818	-0.652494	-0.466441	-0.253228	-0.0762926	0.0654851	0.194979	0.23592	0.193137	0.0626456	-0.111239	-0.306444	-0.404064	-0.42713	-0.42589	-0.462236	-0.532805	-0.587662	-0.589043	-0.474842	-0.303159	-0.134399	-0.0397075	-0.0620664	-0.191457	-0.407232	-0.678013	-0.96847	-1.23691
-0.0649423	0.172765	0.478576	0.779187	0.983419	1.01945	0.903622	0.680556	0.479923	0.296126	0.211054	0.199524	0.195701	0.175715	0.122301	0.0556991	0.0498225	0.0738224	0.0895739	0.0634094	-0.0585866	-0.252604	-0.494346	-0.653996	-0.712171	-0.646439	-0.52096	-0.359094	-0.22563	-0.0804134	0.00976797	0.0759886	0.151216	0.269841	0.415868	0.53507	0.542886	0.456448	0.328984	0.19733	0.0932329	0.019351	-0.0373544	-0.0651084	-0.0748363	-0.0953987	-0.106861	-0.0720452	-0.0460464	-0.0681593
1.03955	0.701959	0.275507	-0.158286	-0.417219	-0.50456	-0.395899	-0.15459	0.117546	0.342307	0.476212	0.474285	0.385696	0.229181	0.0858386	0.0236776	0.0749657	0.235209	0.45554	0.681991	0.867828	0.988987	1.07525	1.07234	1.0474	0.9957	0.987653	1.05204	1.13224	1.11276	1.00496	0.837205	0.650418	0.594765	0.60538	0.702907	0.752044	0.67908	0.493179	0.254855	0.0394877	-0.0578739	-0.0856156	-0.0131112	0.143567	0.258754	0.271193	0.132255	-0.0224388	-0.13577
-1.0368	-0.973058	-0.897635	-0.78593	-0.681925	-0.607144	-0.549214	-0.504408	-0.467545	-0.482501	-0.490265	-0.532203	-0.571896	-0.554819	-0.485546	-0.373645	-0.305186	-0.276137	-0.310819	-0.329834	-0.289269	-0.19288	-0.103693	-0.0501497	0.0401699	0.123669	0.183693	0.155777	0.000767232	-0.259087	-0.50134	-0.633732	-0.634574	-0.419673	-0.0673455	0.407281	0.857263	1.19267	1.4359	1.53744	1.46043	1.20838	0.825962	0.476684	0.23354	0.113952	0.072787	0.0106085	-0.0792514	-0.15702
-0.370288	-0.337026	-0.340834	-0.384621	-0.485411	-0.561737	-0.616127	-0.609321	-0.53735	-0.466417	-0.405373	-0.332226	-0.209252	-0.0728804	0.0420989	0.0575511	-0.0183724	-0.117272	-0.197589	-0.195344	-0.122168	-0.0230044	0.0296798	-0.00252713	-0.171824	-0.408334	-0.616064	-0.696779	-0.577618	-0.26699	0.173924	0.61754	0.897595	0.933652	0.805226	0.602748	0.455164	0.367721	0.294565	0.185055	0.060846	-0.0843357	-0.156903	-0.221377	-0.214518	-0.169031	-0.0853095	-0.0458123	0.0248036	0.144882
0.201834	0.0674082	-0.0608414	-0.153165	-0.241431	-0.286543	-0.350516	-0.398086	-0.487132	-0.637121	-0.77923	-0.909842	-0.955081	-0.939877	-0.805481	-0.598675	-0.354353	-0.118839	0.0556414	0.131684	0.0885544	0.0429027	0.012989	0.00368189	-0.0650355	-0.175034	-0.248662	-0.223327	-0.0404676	0.271233	0.669606	1.05063	1.35322	1.50675	1.53574	1.4814	1.39742	1.26613	1.1008	0.949804	0.879887	0.922347	0.914702	0.769744	0.525999	0.269148	0.113996	0.0895742	0.149165	0.185774
0.519582	0.537499	0.460425	0.29016	0.0217111	-0.265709	-0.47741	-0.508512	-0.402168	-0.176281	0.0735782	0.265588	0.406565	0.462055	0.470403	0.351897	0.161376	-0.0975004	-0.360431	-0.598292	-0.743521	-0.76975	-0.726756	-0.673333	-0.608372	-0.554604	-0.497402	-0.433948	-0.416464	-0.499729	-0.672961	-0.862055	-1.0065	-1.07983	-1.00088	-0.743233	-0.427041	-0.134122	0.0795959	0.212042	0.262418	0.245991	0.193521	0.131126	0.0391578	-0.080014	-0.217355	-0.36469	-0.507865	-0.672716
-0.931058	-0.813441	-0.744529	-0.678608	-0.613023	-0.511384	-0.374699	-0.267846	-0.238807	-0.282991	-0.361008	-0.436923	-0.470318	-0.491192	-0.499393	-0.418513	-0.314177	-0.161917	0.0359969	0.243744	0.377017	0.473533	0.478877	0.41978	0.347882	0.278666	0.225372	0.180651	0.180199	0.195738	0.225833	0.24935	0.290695	0.366278	0.456117	0.566849	0.645711	0.676715	0.671493	0.568775	0.370989	0.176154	0.0513901	0.0189979	0.0236504	0.0180462	-0.0125836	-0.0411991	-0.018116	0.0687978
-0.992326	-1.01494	-1.03168	-1.0196	-0.930742	-0.819419	-0.751797	-0.784809	-0.929872	-1.13148	-1.31319	-1.40789	-1.40587	-1.29733	-1.13577	-0.93535	-0.721932	-0.482961	-0.275134	-0.15787	-0.1603	-0.235224	-0.403832	-0.583869	-0.749014	-0.887463	-0.92511	-0.830513	-0.608733	-0.334697	-0.0962225	-0.0136832	-0.00440479	-0.081169	-0.114454	-0.122504	-0.174779	-0.258243	-0.322579	-0.423885	-0.52367	-0.66294	-0.792056	-0.853485	-0.854799	-0.76218	-0.664414	-0.654571	-0.701583	-0.78287
1.26888	0.966839	0.703318	0.498353	0.401367	0.371408	0.375768	0.398702	0.36618	0.311076	0.199908	0.0528132	-0.0941259	-0.232356	-0.357066	-0.403161	-0.441501	-0.406413	-0.366649	-0.311212	-0.284323	-0.294303	-0.373043	-0.478392	-0.568856	-0.649819	-0.668215	-0.65873	-0.584102	-0.526507	-0.521981	-0.559264	-0.622281	-0.640422	-0.658967	-0.650297	-0.57268	-0.440631	-0.296381	-0.196014	-0.151504	-0.113882	0.00493787	0.143144	0.288755	0.367517	0.340367	0.229081	0.0881241	-0.0477482
-0.828263	-0.76465	-0.686624	-0.537099	-0.344515	-0.0776716	0.212461	0.39361	0.48755	0.417491	0.238424	0.0468893	-0.0218225	0.0849347	0.25383	0.39768	0.439698	0.454261	0.532213	0.678671	0.821486	0.996744	1.14031	1.22686	1.21923	1.12039	0.960879	0.785009	0.557678	0.363845	0.238939	0.233335	0.309141	0.377873	0.370952	0.231634	0.0371572	-0.123881	-0.218866	-0.256371	-0.315395	-0.514343	-0.852026	-1.29086	-1.64839	-1.7732	-1.68179	-1.49755	-1.30652	-1.16671
0.399965	0.363746	0.318949	0.199645	0.079029	-0.0220562	-0.0319971	0.0872508	0.282639	0.473298	0.542494	0.491309	0.420823	0.453659	0.532983	0.643175	0.753242	0.885643	1.05377	1.21323	1.33572	1.39283	1.31483	1.12186	0.884341	0.691916	0.599817	0.638587	0.778129	0.948969	1.02972	1.01256	0.891169	0.748635	0.613623	0.471347	0.335694	0.145822	-0.0676026	-0.237394	-0.348099	-0.448236	-0.532651	-0.635208	-0.722811	-0.843567	-0.966284	-1.01752	-1.02901	-0.989567
0.399965	0.363746	0.318949	0.199645	0.079029	-0.0220562	-0.0319971	0.0872508	0.282639	0.473298	0.542494	0.491309	0.420823	0.453659	0.532983	0.643175	0.753242	0.885643	1.05377	1.21323	1.33572	1.39283	1.31483	1.12186	0.884341	0.691916	0.599817	0.638587	0.778129	0.948969	1.02972	1.01256	0.891169	0.748635	0.613623	0.471347	0.335694	0.145822	-0.0676026	-0.237394	-0.348099	-0.448236	-0.532651	-0.635208	-0.722811	-0.843567	-0.966284	-1.01752	-1.02901	-0.989567
-0.343421	-0.340505	-0.251231	-0.0764146	0.159039	0.371925	0.470083	0.398881	0.179289	-0.0886196	-0.372678	-0.636253	-0.838679	-1.01488	-1.11217	-1.11425	-1.05957	-0.948626	-0.764517	-0.529766	-0.283952	-0.114095	-0.0232817	-0.122314	-0.29384	-0.383345	-0.360756	-0.24908	-0.0895652	0.0309122	0.135012	0.194019	0.243166	0.270403	0.170967	-0.0987185	-0.494687	-0.918782	-1.28772	-1.57952	-1.74257	-1.82419	-1.8523	-1.85067	-1.83961	-1.8408	-1.8966	-2.01952	-2.1408	-2.101
0.531503	0.364915	0.212061	0.0992384	0.055732	0.045402	0.091225	0.110588	0.0906952	0.0632403	0.0541182	0.0670829	0.106128	0.167081	0.172973	0.140651	0.00588694	-0.198045	-0.452592	-0.734078	-0.98594	-1.14849	-1.19798	-1.184	-1.09526	-0.962561	-0.866473	-0.933277	-1.12061	-1.44667	-1.83722	-2.1596	-2.40648	-2.53747	-2.6582	-2.76287	-2.81528	-2.75776	-2.6935	-2.62194	-2.56177	-2.52607	-2.52752	-2.5726	-2.64284	-2.73967	-2.79395	-2.7456	-2.53929	-2.25961
0.582622	0.664069	0.766191	0.788512	0.809774	0.839852	0.942118	1.13006	1.28857	1.39873	1.39862	1.29367	1.12921	1.01105	0.894517	0.803367	0.672539	0.443606	0.194439	0.0264655	0.0131767	0.156542	0.314499	0.371704	0.3364	0.266344	0.279234	0.35659	0.44795	0.433603	0.350774	0.247173	0.231145	0.336427	0.582454	0.86487	1.12403	1.25229	1.25983	1.20797	1.14579	1.09512	1.03641	0.944338	0.810303	0.624861	0.475551	0.452172	0.561058	0.740527
0.405944	0.507476	0.577879	0.57934	0.529505	0.506052	0.549948	0.679985	0.798439	0.856543	0.844547	0.747049	0.627837	0.598673	0.623261	0.752867	0.932295	1.11625	1.32208	1.49104	1.58395	1.53579	1.33943	1.00409	0.645169	0.366714	0.327621	0.53504	0.893898	1.31771	1.55869	1.54162	1.37347	1.15177	0.969186	0.842743	0.745209	0.673669	0.588255	0.460763	0.305359	0.134296	-0.0354628	-0.150385	-0.184972	-0.131498	-0.0419766	0.0641376	0.184338	0.258046
1.09852	0.927011	0.730119	0.50533	0.308879	0.130102	0.0209253	-0.0351836	-0.111647	-0.19663	-0.282513	-0.401759	-0.53441	-0.643241	-0.764946	-0.851669	-0.912486	-0.878935	-0.813158	-0.741081	-0.740645	-0.817718	-0.929397	-1.0179	-1.11245	-1.18386	-1.2227	-1.26497	-1.28362	-1.33471	-1.37679	-1.43818	-1.44984	-1.42629	-1.35705	-1.27067	-1.24734	-1.32446	-1.42034	-1.50517	-1.48647	-1.36869	-1.18525	-1.0001	-0.747027	-0.519622	-0.330696	-0.230156	-0.24301	-0.36421
0.676729	0.697024	0.654721	0.560316	0.391681	0.223759	0.0619103	-0.0499244	-0.101717	-0.118498	-0.0816534	-0.0360254	0.0305683	0.0913308	0.195611	0.359464	0.667351	1.06515	1.47716	1.81336	1.98304	2.07473	2.10462	2.10927	2.15833	2.23836	2.26514	2.24914	2.18261	2.01289	1.83819	1.63308	1.40089	1.15684	0.928348	0.72792	0.536082	0.333271	0.125787	-0.0313785	-0.121314	-0.128331	-0.0825025	-0.0247362	0.0541587	0.172503	0.345958	0.568968	0.74942	0.961131
0.45686	0.478056	0.478122	0.519955	0.593458	0.71478	0.827866	0.915179	0.902856	0.82584	0.791202	0.825797	0.878895	0.907148	0.843036	0.745317	0.731547	0.760126	0.783556	0.711	0.451319	0.129988	-0.145669	-0.243271	-0.100375	0.148243	0.344215	0.413777	0.33479	0.201544	0.00858658	-0.220738	-0.406113	-0.525138	-0.544301	-0.464721	-0.367123	-0.328942	-0.358578	-0.367326	-0.308998	-0.220581	-0.0780967	0.0226645	-0.0166641	-0.152853	-0.307365	-0.354204	-0.270923	-0.147664
0.237724	0.245593	0.217215	0.15878	0.0077523	-0.177542	-0.339215	-0.413287	-0.381381	-0.294276	-0.158843	-0.0524577	0.0290174	0.109775	0.2067	0.247285	0.297603	0.384236	0.55811	0.797685	1.0086	1.15852	1.23915	1.26211	1.1828	1.05395	0.945522	0.845691	0.732297	0.61777	0.614578	0.75159	0.948254	1.12123	1.19624	1.09237	0.82527	0.46348	0.116392	-0.164335	-0.334909	-0.473047	-0.489319	-0.459182	-0.315795	-0.129427	0.105082	0.31789	0.464732	0.594256
-0.50446	-0.350372	-0.197269	-0.0947775	-0.0262227	0.00529693	0.0418329	0.0798904	0.149916	0.2638	0.402073	0.501392	0.49192	0.323287	0.0787734	-0.142009	-0.249662	-0.236001	-0.103589	0.145278	0.404751	0.626305	0.791211	0.882042	0.845138	0.729159	0.596417	0.518976	0.550474	0.581206	0.575494	0.469069	0.272552	0.019851	-0.212335	-0.380855	-0.474431	-0.544355	-0.531387	-0.472873	-0.415539	-0.300641	-0.214857	-0.139492	-0.149475	-0.198008	-0.237748	-0.239485	-0.216604	-0.145509
-0.50446	-0.350372	-0.197269	-0.0947775	-0.0262227	0.00529693	0.0418329	0.0798904	0.149916	0.2638	0.402073	0.501392	0.49192	0.323287	0.0787734	-0.142009	-0.249662	-0.236001	-0.103589	0.145278	0.404751	0.626305	0.791211	0.882042	0.845138	0.729159	0.596417	0.518976	0.550474	0.581206	0.575494	0.469069	0.272552	0.019851	-0.212335	-0.380855	-0.474431	-0.544355	-0.531387	-0.472873	-0.415539	-0.300641	-0.214857	-0.139492	-0.149475	-0.198008	-0.237748	-0.239485	-0.216604	-0.145509
-0.200888	-0.116254	0.0104662	0.106298	0.142952	0.0800662	-0.0651787	-0.24854	-0.420688	-0.499078	-0.487963	-0.431018	-0.381764	-0.331194	-0.269258	-0.070964	0.190385	0.547066	0.835007	0.970237	0.890484	0.691418	0.491673	0.369377	0.397251	0.563709	0.777906	0.993415	1.07739	1.04226	0.97046	0.815513	0.679009	0.439767	0.0959514	-0.30349	-0.671018	-0.917627	-0.999917	-0.961101	-0.892038	-0.87392	-0.964083	-1.09131	-1.19196	-1.23086	-1.19867	-1.13268	-1.04044	-0.971763
-0.667095	-0.474207	-0.312383	-0.189574	-0.145218	-0.1352	-0.056395	0.0713757	0.204424	0.262861	0.238419	0.0876051	-0.0748248	-0.194862	-0.203487	-0.172444	-0.0872181	0.0474946	0.210406	0.423092	0.603671	0.70687	0.714447	0.653738	0.52467	0.441766	0.389056	0.402515	0.448365	0.484498	0.521282	0.568971	0.645233	0.654907	0.591737	0.386297	0.116089	-0.211831	-0.470897	-0.630102	-0.670498	-0.629876	-0.587817	-0.595225	-0.686698	-0.799474	-0.882467	-0.9081	-0.918874	-0.942808
0.12311	0.0817479	0.116715	0.192804	0.424145	0.736546	0.978489	0.989374	0.771582	0.47796	0.338283	0.380215	0.51378	0.717206	0.864926	1.02627	1.25315	1.50171	1.75964	1.97114	2.06646	2.05644	1.94856	1.77994	1.58916	1.42344	1.26615	1.18074	1.10511	1.09137	1.09571	1.12909	1.19492	1.16458	1.02762	0.709239	0.2188	-0.382887	-0.969852	-1.43007	-1.67501	-1.79646	-1.84327	-1.8905	-1.90712	-1.72398	-1.3476	-0.787441	-0.233843	0.233085
0.798174	0.842604	0.830544	0.756656	0.626724	0.494163	0.482566	0.562122	0.763194	0.954581	1.16748	1.33424	1.45798	1.52578	1.58378	1.48462	1.27604	1.01759	0.776867	0.649492	0.690856	0.853062	1.0272	1.11292	1.03371	0.838815	0.521928	0.206601	-0.0491907	-0.221423	-0.285495	-0.274843	-0.271813	-0.266973	-0.221302	-0.126048	-0.0419326	-0.028646	-0.100114	-0.214619	-0.357172	-0.359794	-0.216242	0.00614918	0.197504	0.280668	0.290276	0.257774	0.246546	0.265354
0.692688	0.837315	0.935401	0.914507	0.803683	0.665843	0.527307	0.324378	0.0576882	-0.19492	-0.451747	-0.560156	-0.468934	-0.197033	0.160009	0.56876	0.916741	1.12355	1.16892	1.16507	1.15112	1.14966	1.20543	1.28196	1.37102	1.42317	1.4648	1.51447	1.54673	1.50953	1.43483	1.35089	1.25245	1.10076	0.90457	0.635633	0.354812	0.0303426	-0.293457	-0.578096	-0.744584	-0.743571	-0.539598	-0.119084	0.365476	0.785188	0.905585	0.734891	0.450879	0.287466
-2.13186	-2.14857	-2.06544	-1.88531	-1.63018	-1.36592	-1.10591	-0.978652	-0.971851	-1.03473	-1.06594	-0.997201	-0.894381	-0.806661	-0.771964	-0.746531	-0.665369	-0.518612	-0.346674	-0.193237	-0.0560617	0.0744741	0.19963	0.352688	0.531818	0.608273	0.578062	0.474161	0.28325	0.128201	0.0477033	0.0595127	0.139054	0.224736	0.250784	0.247395	0.142357	-0.00365851	-0.108903	-0.216561	-0.284731	-0.319455	-0.294065	-0.220026	-0.0994709	-0.048417	-0.126197	-0.338905	-0.543788	-0.620095
0.0219433	-0.0176318	0.0507741	0.163658	0.376597	0.581368	0.747944	0.836999	0.80766	0.679888	0.46548	0.229052	-0.016662	-0.272254	-0.434584	-0.446267	-0.252699	0.012766	0.326118	0.662701	0.968594	1.25851	1.4668	1.5365	1.44455	1.27294	1.0835	0.976729	0.965004	1.02126	1.12167	1.10523	0.913185	0.514856	0.0639874	-0.302232	-0.565857	-0.766932	-0.956445	-1.15092	-1.24264	-1.20827	-1.06154	-0.858819	-0.66142	-0.520717	-0.406146	-0.335539	-0.30158	-0.312122
-0.00785002	0.0342398	0.0900897	0.180361	0.27876	0.330186	0.356808	0.37689	0.409234	0.468111	0.528308	0.5601	0.532262	0.469781	0.452241	0.499953	0.546478	0.565648	0.563243	0.537067	0.600195	0.713101	0.865155	1.00136	1.12757	1.25495	1.32283	1.29581	1.13099	0.9069	0.680062	0.483988	0.364639	0.312134	0.325521	0.312287	0.243852	0.150376	0.0770522	0.0257575	-0.0687262	-0.259737	-0.475857	-0.67165	-0.730052	-0.650951	-0.518778	-0.398796	-0.359079	-0.37693
-0.644737	-0.576958	-0.458749	-0.353145	-0.229838	-0.0382612	0.169064	0.359351	0.409762	0.339588	0.219508	0.0592714	-0.0143182	0.0184648	0.105432	0.212184	0.244452	0.165905	0.12124	0.149201	0.292176	0.552949	0.812427	1.0453	1.11846	1.10389	1.05941	1.04471	1.13182	1.30375	1.47757	1.63098	1.74192	1.83916	1.89898	1.85922	1.69812	1.42293	1.03844	0.660466	0.346551	0.164098	0.0983809	0.0473282	0.0163356	0.0581644	0.232884	0.466956	0.610921	0.523639
-0.230107	-0.255068	-0.207106	-0.127689	-0.0151078	0.11786	0.239178	0.339183	0.408499	0.519102	0.705836	0.976899	1.23808	1.44749	1.57883	1.51193	1.31704	1.10447	0.934113	0.826785	0.741952	0.667538	0.643492	0.6473	0.691547	0.756916	0.88555	0.99767	1.06972	1.10786	1.0813	0.984823	0.828056	0.720958	0.733	0.788368	0.815028	0.798364	0.713529	0.575377	0.503075	0.518499	0.635808	0.700923	0.643369	0.489977	0.228563	-0.0324997	-0.177018	-0.219572
1.0876	0.922838	0.777645	0.675865	0.655085	0.682939	0.743695	0.781145	0.801118	0.816883	0.820291	0.850133	0.795736	0.68019	0.505204	0.322311	0.195758	0.143012	0.187103	0.270263	0.315452	0.277601	0.160494	-0.0519694	-0.28079	-0.501916	-0.629917	-0.604222	-0.543848	-0.440054	-0.370953	-0.328969	-0.305015	-0.344268	-0.457784	-0.598077	-0.743723	-0.862569	-0.935443	-0.997105	-1.03962	-1.10337	-1.13409	-1.10564	-1.06671	-1.01856	-0.956126	-0.819868	-0.608083	-0.375858
0.0631467	0.0390247	0.0491933	0.0631358	0.122311	0.217996	0.324291	0.409585	0.43301	0.486928	0.57342	0.665209	0.7129	0.686207	0.610093	0.492353	0.404973	0.335906	0.345355	0.37395	0.474855	0.615285	0.755945	0.851132	0.884491	0.878152	0.786793	0.646462	0.488547	0.368127	0.334413	0.308366	0.259668	0.169006	0.0359252	-0.14563	-0.279349	-0.358205	-0.355481	-0.410987	-0.527024	-0.722869	-0.881131	-0.955308	-0.88916	-0.739036	-0.514092	-0.29561	-0.119706	-0.015511
-0.0856837	-0.251809	-0.39446	-0.45831	-0.394269	-0.279645	-0.115906	0.0337013	0.172272	0.197539	0.10632	-0.0905954	-0.284584	-0.420555	-0.48981	-0.490209	-0.421995	-0.292468	-0.143126	-0.0224635	0.0419522	0.103537	0.105854	0.0983234	0.114883	0.200158	0.274686	0.294957	0.267513	0.188238	0.0970968	0.00392602	-0.0607524	-0.171155	-0.328994	-0.618326	-0.984587	-1.4032	-1.77124	-1.97936	-1.9919	-1.79256	-1.4264	-0.978781	-0.530095	-0.117233	0.186415	0.381367	0.421937	0.417173
0.130989	0.281847	0.429727	0.572192	0.686441	0.758635	0.788239	0.764896	0.707829	0.616174	0.530948	0.343545	0.119731	-0.0917669	-0.14247	-0.0336041	0.257644	0.590094	0.789303	0.830145	0.694581	0.540044	0.397744	0.297531	0.174261	0.0649489	-0.0110676	0.0721888	0.334404	0.796886	1.31327	1.74694	1.96918	1.96244	1.77786	1.49149	1.13881	0.831211	0.597036	0.465627	0.428867	0.36052	0.165734	-0.190777	-0.567315	-0.903615	-1.02636	-0.930787	-0.642031	-0.336383
-0.03762	0.13583	0.420289	0.717275	1.04603	1.33203	1.49635	1.47041	1.24764	0.887952	0.555025	0.33709	0.23826	0.22472	0.214281	0.204522	0.22516	0.350058	0.589199	0.835655	1.01336	1.10482	1.11911	1.08512	0.95169	0.74908	0.489101	0.224681	0.0685481	0.0572456	0.199238	0.385983	0.562443	0.595989	0.508247	0.333316	0.111265	-0.166086	-0.463794	-0.709849	-0.88662	-1.03337	-1.14698	-1.25031	-1.3988	-1.52534	-1.59559	-1.6029	-1.58039	-1.53836
0.01221	-0.0916342	-0.1886	-0.264536	-0.249866	-0.130667	0.0809926	0.276271	0.386166	0.320847	0.0766806	-0.126412	-0.244197	-0.257216	-0.19793	-0.108381	-0.0325227	0.115165	0.248838	0.366184	0.413326	0.341474	0.172931	-0.00624439	-0.192536	-0.314873	-0.385459	-0.479325	-0.529212	-0.490934	-0.335511	-0.147028	0.0700978	0.208349	0.334008	0.315866	0.234766	0.103059	0.0346507	-0.0325853	-0.135917	-0.205751	-0.286065	-0.252928	-0.0723948	0.19026	0.443905	0.557218	0.505669	0.36474
0.254615	0.559232	0.799365	0.894394	0.810665	0.556124	0.275718	0.0518997	-0.0480441	-0.037196	0.0789711	0.229272	0.380419	0.480572	0.438339	0.3538	0.291153	0.262312	0.22843	0.187402	0.0734942	-0.0207235	-0.118404	-0.192283	-0.303688	-0.467947	-0.626748	-0.734905	-0.67188	-0.482139	-0.262557	-0.152045	-0.183985	-0.354591	-0.543225	-0.662713	-0.707317	-0.680034	-0.585342	-0.464719	-0.316494	-0.190384	-0.140796	-0.140579	-0.180492	-0.189313	-0.154245	-0.160259	-0.238327	-0.415731
0.254615	0.559232	0.799365	0.894394	0.810665	0.556124	0.275718	0.0518997	-0.0480441	-0.037196	0.0789711	0.229272	0.380419	0.480572	0.438339	0.3538	0.291153	0.262312	0.22843	0.187402	0.0734942	-0.0207235	-0.118404	-0.192283	-0.303688	-0.467947	-0.626748	-0.734905	-0.67188	-0.482139	-0.262557	-0.152045	-0.183985	-0.354591	-0.543225	-0.662713	-0.707317	-0.680034	-0.585342	-0.464719	-0.316494	-0.190384	-0.140796	-0.140579	-0.180492	-0.189313	-0.154245	-0.160259	-0.238327	-0.415731
-1.21728	-1.12553	-1.03036	-0.966695	-0.94883	-0.990106	-1.05095	-1.04928	-0.96738	-0.842821	-0.68343	-0.516983	-0.384563	-0.313785	-0.293763	-0.288826	-0.265034	-0.207539	-0.140629	-0.126894	-0.189285	-0.30456	-0.443903	-0.554371	-0.621183	-0.625906	-0.596728	-0.5561	-0.505564	-0.465272	-0.444175	-0.435444	-0.414782	-0.347522	-0.264097	-0.18877	-0.154078	-0.14758	-0.141438	-0.168295	-0.20608	-0.253255	-0.305209	-0.348879	-0.385883	-0.422231	-0.427664	-0.419094	-0.378019	-0.327612
-0.568029	-0.635975	-0.700494	-0.76818	-0.827699	-0.866223	-0.898466	-0.901291	-0.907773	-0.917421	-0.901259	-0.88432	-0.857918	-0.880633	-0.94549	-1.0196	-1.06474	-1.09933	-1.11756	-1.11342	-1.06464	-0.999738	-0.942535	-0.906313	-0.881167	-0.788103	-0.617794	-0.436365	-0.329222	-0.384637	-0.567271	-0.778973	-0.940063	-1.0029	-0.983042	-0.955004	-1.00312	-1.12296	-1.33186	-1.58419	-1.77551	-1.82801	-1.75942	-1.62659	-1.52759	-1.48105	-1.54154	-1.66773	-1.80708	-1.89347
0.621505	0.405267	0.205719	0.0183885	-0.125842	-0.221515	-0.27025	-0.336576	-0.428422	-0.565639	-0.662103	-0.747045	-0.739389	-0.672559	-0.580314	-0.522302	-0.476798	-0.423024	-0.411623	-0.388385	-0.375688	-0.304682	-0.202073	-0.0316726	0.108778	0.177242	0.171637	0.11595	0.011762	-0.127917	-0.26764	-0.312168	-0.223269	-0.0246792	0.190707	0.385835	0.470393	0.478424	0.445198	0.429577	0.408282	0.314213	0.262093	0.205252	0.13893	0.0228798	-0.10047	-0.1769	-0.179748	-0.0961635
0.245783	0.126063	0.0246911	-0.0822219	-0.209164	-0.340947	-0.532073	-0.746099	-1.07912	-1.43164	-1.68708	-1.7779	-1.7418	-1.6336	-1.56108	-1.57839	-1.62026	-1.63779	-1.48231	-1.11789	-0.585634	-0.0908829	0.196414	0.197224	-0.0576138	-0.425058	-0.818041	-1.08221	-1.21879	-1.3091	-1.36348	-1.40086	-1.4181	-1.4034	-1.35091	-1.30602	-1.17645	-1.06106	-0.880378	-0.724893	-0.559191	-0.289081	0.0397983	0.277016	0.451652	0.509892	0.40787	0.231492	0.00689757	-0.11943
-0.416996	-0.421591	-0.482826	-0.581295	-0.6834	-0.757262	-0.750769	-0.677902	-0.551549	-0.489452	-0.514686	-0.627567	-0.724874	-0.786268	-0.760898	-0.66006	-0.510011	-0.27992	-0.0530765	0.123259	0.204077	0.171131	0.124761	0.0573683	0.0184973	0.0109244	-0.00772493	-0.00298045	-0.0563828	-0.105149	-0.146106	-0.0986101	0.0117098	0.177741	0.313805	0.370961	0.342649	0.243981	0.12628	-0.0323105	-0.150191	-0.212049	-0.231037	-0.216523	-0.152174	-0.0789751	0.0453985	0.172342	0.212938	0.167591
0.976111	0.763013	0.616101	0.474657	0.430731	0.373943	0.316619	0.26601	0.287255	0.360864	0.451716	0.489448	0.441105	0.344071	0.208209	0.168689	0.155814	0.168684	0.189243	0.242131	0.29748	0.362861	0.409394	0.496041	0.560659	0.646206	0.765899	0.92986	1.10394	1.25951	1.29282	1.1231	0.867585	0.593192	0.425639	0.339034	0.334348	0.405582	0.539645	0.635302	0.631763	0.526291	0.347948	0.274649	0.306375	0.408116	0.511931	0.611868	0.665079	0.661596
-0.967716	-0.980773	-1.02228	-1.09098	-1.16459	-1.23433	-1.28369	-1.30768	-1.3054	-1.27623	-1.23836	-1.20223	-1.16075	-1.1472	-1.15533	-1.15737	-1.14863	-1.1173	-1.0915	-1.10794	-1.17585	-1.27059	-1.33728	-1.3474	-1.33055	-1.31279	-1.30077	-1.29715	-1.28193	-1.24098	-1.20335	-1.23686	-1.35077	-1.50267	-1.62339	-1.6659	-1.63681	-1.5568	-1.45681	-1.38288	-1.35109	-1.3774	-1.44326	-1.52434	-1.58177	-1.5816	-1.54523	-1.4804	-1.44451	-1.43771
-0.354964	-0.345518	-0.285133	-0.198714	-0.0695224	0.137788	0.391158	0.628056	0.759659	0.794096	0.742964	0.704674	0.746991	0.864549	1.07552	1.32378	1.56822	1.75153	1.83054	1.8305	1.79483	1.75266	1.71749	1.68363	1.66149	1.6049	1.58218	1.50763	1.36558	1.19553	1.04128	0.932836	0.880723	0.911501	0.949787	0.956444	0.891008	0.760369	0.608782	0.444994	0.252715	0.0424029	-0.125375	-0.198038	-0.215572	-0.259959	-0.358019	-0.451602	-0.458417	-0.336955
-0.149796	-0.0745192	-0.0839926	-0.115598	-0.199331	-0.292461	-0.38419	-0.479952	-0.533162	-0.583521	-0.663177	-0.71211	-0.723861	-0.725121	-0.714795	-0.659538	-0.57541	-0.444378	-0.340475	-0.244383	-0.175697	-0.125319	-0.130379	-0.180668	-0.290076	-0.390818	-0.439084	-0.38351	-0.195415	0.0911362	0.376425	0.61524	0.741784	0.707379	0.515152	0.315323	0.192638	0.199411	0.339555	0.529483	0.59694	0.549475	0.411603	0.272792	0.120261	-0.079135	-0.304683	-0.532506	-0.712316	-0.712763
-1.31057	-1.29241	-1.26513	-1.20862	-1.12364	-1.00024	-0.879386	-0.792795	-0.732336	-0.742915	-0.800929	-0.875541	-0.940454	-0.962187	-0.941909	-0.959411	-1.03049	-1.16829	-1.29291	-1.34188	-1.33142	-1.32104	-1.31973	-1.36664	-1.42347	-1.46243	-1.45587	-1.36463	-1.18366	-0.976266	-0.775682	-0.611766	-0.523358	-0.469747	-0.50188	-0.614934	-0.808561	-1.02472	-1.19351	-1.26866	-1.23783	-1.13422	-1.01187	-0.947581	-0.925921	-0.955749	-1.02701	-1.10566	-1.16734	-1.21113
-1.20614	-1.20954	-1.09501	-0.850154	-0.495252	-0.0630492	0.319173	0.557004	0.582458	0.436033	0.224516	0.067044	0.0403664	0.077245	0.0655988	-0.0687989	-0.200274	-0.326776	-0.410864	-0.393487	-0.338848	-0.350569	-0.412405	-0.426117	-0.336962	-0.172224	-0.0196329	0.0677662	0.043997	-0.0659868	-0.205908	-0.309366	-0.342038	-0.300239	-0.16404	0.0605685	0.31527	0.605916	0.887574	1.07588	1.12664	1.06351	0.891755	0.667777	0.412515	0.201455	0.0375825	-0.0945603	-0.121811	-0.0620824
0.00357416	0.0446597	-0.0432808	-0.264681	-0.586206	-0.892765	-1.12816	-1.17599	-1.0225	-0.766409	-0.478645	-0.252464	-0.155841	-0.21974	-0.406569	-0.623159	-0.853514	-1.06008	-1.19914	-1.24143	-1.19068	-1.0512	-0.87287	-0.72747	-0.598149	-0.488758	-0.397816	-0.302105	-0.234786	-0.264352	-0.34375	-0.452981	-0.465999	-0.347402	-0.127136	0.139193	0.411174	0.60536	0.666913	0.613504	0.530538	0.52181	0.622722	0.790377	1.02215	1.23094	1.36366	1.41477	1.37986	1.27614
2.02947	1.96623	1.90853	1.8699	1.83393	1.74813	1.60548	1.47902	1.40224	1.41667	1.48245	1.50656	1.46335	1.34242	1.17157	1.01107	0.961969	1.00672	1.13998	1.29897	1.39639	1.47035	1.47805	1.44623	1.39898	1.31507	1.21236	1.10352	0.975457	0.836865	0.685531	0.544365	0.412203	0.263952	0.092141	-0.0978492	-0.25415	-0.332946	-0.336558	-0.273331	-0.152776	-0.0576691	-0.0780289	-0.182709	-0.268251	-0.310293	-0.280685	-0.249958	-0.24368	-0.280643
0.0778456	0.112702	0.142399	0.203926	0.25439	0.322292	0.443936	0.567757	0.68709	0.722515	0.677803	0.571848	0.46074	0.355981	0.277881	0.226583	0.207508	0.241816	0.315649	0.412353	0.479072	0.486454	0.431332	0.312256	0.129096	-0.0767866	-0.246115	-0.308097	-0.251376	-0.139367	-0.0164525	0.00773915	-0.00469588	-0.051814	-0.10742	-0.189731	-0.324333	-0.4801	-0.605605	-0.628218	-0.591725	-0.503523	-0.431141	-0.409649	-0.428997	-0.409939	-0.249921	-0.0382951	0.143871	0.197811
1.70621	1.68083	1.65845	1.67914	1.73382	1.85983	1.94472	1.9578	1.83771	1.60347	1.35234	1.23112	1.29137	1.55795	1.87776	2.11787	2.21747	2.18496	2.13507	2.06022	1.92294	1.70683	1.4338	1.14907	1.00751	1.03259	1.13371	1.26807	1.37845	1.42534	1.36073	1.2755	1.20972	1.12853	1.0072	0.81144	0.624752	0.520817	0.572198	0.768037	0.996282	1.16827	1.15746	1.06872	0.989018	0.919817	0.88342	0.855771	0.896076	0.979095
0.419439	0.404965	0.353861	0.18876	-0.0243587	-0.22635	-0.323706	-0.241954	-0.0402531	0.207985	0.393989	0.464089	0.447207	0.375716	0.230955	0.033675	-0.158152	-0.295176	-0.367723	-0.311356	-0.19755	-0.0933567	-0.0390438	-0.0922442	-0.200037	-0.319546	-0.448747	-0.55181	-0.658197	-0.813179	-0.956411	-1.00891	-0.884527	-0.60675	-0.302222	-0.104974	-0.085916	-0.233265	-0.383252	-0.431685	-0.33583	-0.145554	-0.00806314	-0.00967376	-0.106357	-0.187409	-0.140535	0.0142233	0.196947	0.319156
1.91804	1.94504	1.99616	2.03988	2.04293	1.96952	1.82397	1.67582	1.5619	1.51218	1.53274	1.57955	1.63899	1.68387	1.70244	1.69702	1.60926	1.47139	1.33164	1.20266	1.10547	1.05177	1.02422	1.00593	0.982138	0.932257	0.834414	0.68784	0.527684	0.391976	0.265278	0.165543	0.115161	0.0852051	0.104737	0.139207	0.176661	0.168082	0.0871262	-0.0710015	-0.231217	-0.35964	-0.434631	-0.483428	-0.519524	-0.559183	-0.616765	-0.723183	-0.881409	-1.07795
-0.901884	-0.983216	-1.12061	-1.20855	-1.20771	-1.0894	-0.825944	-0.509581	-0.284052	-0.106805	0.0138603	0.138563	0.267666	0.310522	0.21293	-0.0480145	-0.364775	-0.588138	-0.608437	-0.452732	-0.278203	-0.205075	-0.2497	-0.306832	-0.294281	-0.211419	-0.106289	-0.0450868	0.00283671	0.0308076	0.0575946	0.00905588	-0.190265	-0.481459	-0.765295	-0.9633	-0.997094	-0.938193	-0.878064	-0.842178	-0.892769	-0.995639	-1.17464	-1.38012	-1.54365	-1.5846	-1.54149	-1.43808	-1.30857	-1.23197
-0.556377	-0.481386	-0.421778	-0.429031	-0.465273	-0.533068	-0.589742	-0.625464	-0.607705	-0.543617	-0.437487	-0.349474	-0.295293	-0.242891	-0.210517	-0.179628	-0.169475	-0.192094	-0.258812	-0.364618	-0.488736	-0.570695	-0.603404	-0.552631	-0.430984	-0.300468	-0.176926	-0.102041	-0.0956116	-0.155424	-0.235114	-0.249995	-0.175222	-0.0223088	0.157805	0.331769	0.459165	0.538799	0.553186	0.486916	0.311909	0.0531482	-0.177116	-0.341108	-0.445384	-0.542379	-0.65707	-0.805631	-0.945732	-1.06601
-0.8073	-0.795163	-0.841041	-0.916998	-1.08719	-1.31569	-1.54649	-1.69292	-1.70346	-1.65865	-1.60312	-1.59788	-1.63249	-1.72496	-1.8284	-1.92573	-1.95127	-1.89725	-1.75593	-1.51157	-1.26294	-1.03491	-0.842124	-0.76909	-0.826603	-1.0127	-1.29909	-1.55912	-1.77414	-1.8796	-1.79806	-1.55729	-1.23603	-0.942191	-0.762688	-0.663034	-0.575052	-0.432041	-0.297447	-0.231564	-0.236645	-0.237649	-0.208072	-0.0826987	0.0635045	0.194666	0.264648	0.376305	0.538775	0.713651
-1.07361	-1.04989	-1.03211	-1.02136	-1.01247	-1.0143	-0.990581	-0.956116	-0.925908	-0.891257	-0.873399	-0.862761	-0.862768	-0.899457	-0.950125	-1.01122	-1.07085	-1.09787	-1.08316	-1.03929	-0.959473	-0.897106	-0.858203	-0.8524	-0.855306	-0.854389	-0.846985	-0.839482	-0.838344	-0.847534	-0.867222	-0.888143	-0.904031	-0.919639	-0.927129	-0.945659	-0.978306	-1.02848	-1.07477	-1.09403	-1.07724	-1.07289	-1.09939	-1.14925	-1.22209	-1.28276	-1.30011	-1.26961	-1.23036	-1.20284
-1.13039	-1.13877	-1.1726	-1.22268	-1.26668	-1.33513	-1.40356	-1.48899	-1.53152	-1.50612	-1.41472	-1.31785	-1.18785	-1.03103	-0.854	-0.594527	-0.300012	0.0214697	0.249907	0.400066	0.519697	0.66146	0.762834	0.829195	0.818848	0.727805	0.564286	0.346961	0.143845	-0.0226496	-0.119906	-0.132258	2.28537e-05	0.241569	0.522462	0.764994	0.869288	0.832528	0.658534	0.514417	0.472577	0.615438	0.857983	1.073	1.15663	1.08624	0.951025	0.757039	0.562893	0.376888
-0.164796	0.217003	0.610407	0.931303	1.11144	1.14899	1.16987	1.19188	1.22785	1.18021	1.01317	0.81626	0.707781	0.769483	0.978772	1.1559	1.23251	1.14482	0.948011	0.720116	0.534716	0.436709	0.460189	0.570605	0.761765	0.956725	1.05841	1.0786	1.02242	0.928384	0.785321	0.603897	0.389561	0.167749	-0.00750628	-0.13901	-0.265381	-0.486946	-0.816467	-1.20258	-1.55007	-1.69916	-1.66524	-1.5551	-1.47823	-1.44637	-1.45344	-1.34238	-1.08795	-0.752511
1.22854	1.09309	0.896759	0.6067	0.306721	0.0820462	-0.0102098	0.00521304	0.106737	0.244089	0.40314	0.520045	0.59448	0.58136	0.451145	0.235037	0.115289	0.140173	0.295199	0.416922	0.403205	0.287514	0.124264	-0.0174573	-0.0876904	-0.110789	-0.09266	-0.0577143	-0.0264509	0.00962178	0.0708185	0.181706	0.313138	0.3809	0.377267	0.320131	0.251868	0.232013	0.198013	0.117022	-0.0527434	-0.226952	-0.288902	-0.242991	-0.126186	-0.0283414	0.062054	0.0839594	0.0207767	-0.0713202
-0.075373	0.00485995	0.0578299	0.112841	0.140639	0.206482	0.317948	0.486153	0.719967	0.999501	1.18328	1.22208	1.17632	1.14267	1.23699	1.39531	1.54735	1.58757	1.4875	1.2821	1.09674	0.982576	0.992909	1.08745	1.1583	1.17929	1.05021	0.848271	0.605037	0.36627	0.190992	0.0855428	0.0304706	-0.0130712	-0.0352634	-0.0407711	0.0271073	0.112302	0.253907	0.414206	0.539457	0.661018	0.72515	0.725125	0.65787	0.503141	0.251484	0.0255968	-0.105094	-0.111435
0.552273	0.547195	0.513582	0.443477	0.351001	0.222294	0.107994	0.035756	0.0547561	0.116547	0.161706	0.150678	0.011654	-0.211708	-0.389336	-0.442451	-0.3769	-0.22975	-0.0973677	0.00208702	0.0130675	-0.052809	-0.119468	-0.175291	-0.201819	-0.177164	-0.114433	-0.0571686	-0.0426337	-0.13705	-0.288531	-0.445693	-0.554633	-0.576684	-0.541134	-0.528745	-0.511597	-0.499604	-0.4467	-0.371908	-0.332704	-0.353426	-0.394818	-0.436219	-0.46269	-0.458918	-0.441024	-0.393487	-0.295241	-0.223022
-0.877506	-0.687612	-0.429894	-0.10888	0.177246	0.336142	0.360768	0.26505	0.09991	-0.0745153	-0.187636	-0.267714	-0.245157	-0.119605	0.0361244	0.160428	0.18887	0.094553	-0.0468677	-0.199136	-0.345537	-0.505316	-0.756459	-1.02095	-1.26543	-1.44191	-1.51132	-1.50157	-1.44909	-1.37769	-1.33697	-1.24317	-1.10297	-0.967943	-0.877707	-0.822642	-0.79624	-0.731264	-0.574512	-0.38133	-0.240169	-0.203771	-0.192635	-0.15882	-0.0362803	0.0461236	0.0621751	-0.0393362	-0.165656	-0.241678
-0.611768	-0.591246	-0.507644	-0.362681	-0.113236	0.123322	0.302922	0.390298	0.350894	0.253124	0.193665	0.18378	0.226227	0.274749	0.289259	0.2751	0.192148	0.0912205	0.0415605	-0.0819138	-0.250046	-0.520865	-0.84089	-1.11284	-1.17259	-1.00007	-0.660657	-0.291781	-0.0106826	0.0892353	0.0116944	-0.164558	-0.281734	-0.237958	-0.0521207	0.221056	0.463047	0.576731	0.556443	0.470396	0.295925	0.0827448	-0.135445	-0.275158	-0.352374	-0.389714	-0.426167	-0.448023	-0.407863	-0.286502
0.373674	0.340695	0.347871	0.465367	0.641754	0.849655	1.02717	1.16124	1.18488	1.08756	0.98122	0.822593	0.633877	0.425128	0.243508	0.0986378	0.0712813	0.137072	0.29586	0.511625	0.708883	0.871745	0.901902	0.830524	0.660104	0.425485	0.255987	0.22063	0.294378	0.354653	0.229574	-0.0235778	-0.314219	-0.550177	-0.547111	-0.335686	0.0407878	0.491785	0.893068	1.19162	1.34745	1.29392	1.11299	0.88289	0.687674	0.581072	0.463901	0.361115	0.290587	0.273313
1.04325	1.01822	0.965555	0.954047	0.946035	0.965208	0.938894	0.841598	0.721803	0.625669	0.509015	0.395104	0.272484	0.169672	0.104265	0.0891691	0.201729	0.377313	0.54844	0.65142	0.6132	0.495753	0.348532	0.208458	0.0745559	-0.0916577	-0.296717	-0.458713	-0.544832	-0.450098	-0.180598	0.176255	0.567081	0.922587	1.15249	1.19151	1.07008	0.89974	0.783031	0.784577	0.90442	1.05871	1.16653	1.1873	1.14009	1.08643	1.11198	1.22793	1.37481	1.51994
0.764665	0.740008	0.732138	0.749298	0.735627	0.693891	0.609285	0.493551	0.336006	0.258631	0.262252	0.32745	0.4191	0.398967	0.274726	0.124648	0.027112	0.00694895	0.110051	0.290675	0.553672	0.784901	0.936007	1.0396	1.16682	1.32152	1.51541	1.6267	1.5591	1.33584	0.992443	0.610533	0.302494	0.0891384	0.00787401	0.0302958	0.11042	0.283242	0.518941	0.718845	0.871724	1.02754	1.16568	1.32256	1.51464	1.70411	1.88806	1.97395	1.94476	1.81083
-1.08539	-0.782764	-0.551818	-0.439722	-0.485956	-0.650464	-0.802884	-0.811149	-0.670198	-0.460605	-0.300425	-0.256351	-0.314037	-0.432965	-0.559976	-0.699071	-0.873454	-1.05037	-1.16229	-1.16299	-1.14806	-1.09992	-1.06619	-0.994214	-0.883621	-0.767546	-0.67323	-0.655899	-0.693686	-0.79665	-0.879621	-0.925995	-0.85752	-0.72263	-0.594388	-0.451994	-0.411657	-0.502138	-0.730139	-0.992497	-1.28882	-1.586	-1.80346	-1.85343	-1.75127	-1.52518	-1.27357	-1.05588	-0.893254	-0.761017
-0.7857	-0.809402	-0.826859	-0.908888	-0.947906	-0.942254	-0.90814	-0.812122	-0.703451	-0.491937	-0.279261	-0.0916139	0.0329944	0.142866	0.179816	0.171223	0.076744	-0.0374007	-0.138741	-0.222188	-0.229836	-0.204136	-0.167993	-0.21897	-0.302136	-0.446315	-0.556594	-0.602626	-0.566345	-0.542607	-0.591165	-0.672992	-0.721	-0.621083	-0.503274	-0.391041	-0.386024	-0.48112	-0.566053	-0.598146	-0.572385	-0.584434	-0.634153	-0.775443	-0.909954	-1.00382	-0.991052	-0.921789	-0.850615	-0.775135
1.17069	1.10539	1.1266	1.17274	1.19452	1.11669	0.95512	0.781088	0.636413	0.566115	0.549227	0.546575	0.519012	0.488444	0.398313	0.310467	0.290712	0.313458	0.363296	0.371329	0.332761	0.299839	0.30186	0.341605	0.442956	0.498982	0.55997	0.663195	0.780181	0.917721	1.04799	1.13559	1.17934	1.16908	1.12431	1.05224	0.972297	0.919081	0.898732	0.882994	0.846504	0.76407	0.731843	0.757813	0.781058	0.749816	0.651656	0.476689	0.331005	0.217355
-0.487003	-0.275067	0.0188934	0.375077	0.742075	1.0209	1.09792	0.950104	0.657545	0.310976	-0.0342421	-0.374583	-0.655854	-0.928415	-1.18885	-1.35403	-1.39354	-1.31605	-1.19618	-1.082	-0.980611	-0.881716	-0.765249	-0.593533	-0.35503	-0.0757353	0.186646	0.338231	0.363985	0.277036	0.0848947	-0.132872	-0.307724	-0.376322	-0.363801	-0.284569	-0.210491	-0.160837	-0.124672	-0.0912869	-0.132225	-0.219994	-0.286276	-0.309054	-0.265424	-0.163058	0.0383773	0.308151	0.532072	0.620171
0.479212	0.460706	0.419621	0.391639	0.399641	0.449293	0.4883	0.434557	0.307484	0.11284	0.00798851	-0.094115	-0.165732	-0.275287	-0.451318	-0.566586	-0.628695	-0.547044	-0.378001	-0.132131	0.163776	0.473785	0.773832	0.992962	1.12267	1.09059	0.951371	0.736025	0.567683	0.470812	0.48797	0.535752	0.560385	0.47785	0.299413	0.0205116	-0.302562	-0.584718	-0.715495	-0.668094	-0.490843	-0.266069	-0.130937	-0.127072	-0.242079	-0.348722	-0.392191	-0.39911	-0.440554	-0.520359
-0.279977	-0.320703	-0.325829	-0.363231	-0.479301	-0.691812	-0.9252	-1.12528	-1.18013	-1.03958	-0.77224	-0.469348	-0.234058	-0.0693305	-0.0181905	-0.0767174	-0.277168	-0.543625	-0.805479	-1.05387	-1.25964	-1.3368	-1.26117	-1.04364	-0.699414	-0.35702	-0.091241	-0.0120349	-0.0969981	-0.207483	-0.196241	-0.100305	0.0849428	0.205793	0.197363	0.128165	0.0609676	0.0349549	0.0133907	-0.00216395	-0.112444	-0.401681	-0.789711	-1.09009	-1.1919	-1.1149	-0.910507	-0.694427	-0.514175	-0.44662
-1.37836	-0.950124	-0.524931	-0.180388	0.0253179	0.0774193	0.111328	0.145078	0.233091	0.343607	0.445039	0.52967	0.594754	0.657152	0.683522	0.737199	0.729135	0.664788	0.558537	0.450647	0.398138	0.350085	0.278714	0.26099	0.248997	0.246087	0.213752	0.176689	0.205405	0.307581	0.476524	0.689844	0.894413	1.04368	1.05462	0.990672	0.898873	0.757101	0.586914	0.42896	0.276071	0.203691	0.229347	0.389227	0.580158	0.747548	0.796656	0.754441	0.649483	0.492497
-0.238082	-0.22013	-0.231862	-0.266779	-0.276041	-0.294136	-0.386111	-0.534024	-0.665581	-0.726048	-0.636845	-0.455535	-0.197687	0.0213315	0.0942274	0.0709554	-0.0474864	-0.2395	-0.423245	-0.552059	-0.601563	-0.595524	-0.579841	-0.608256	-0.640362	-0.691779	-0.748162	-0.770852	-0.776288	-0.718994	-0.557779	-0.302961	-0.110362	-0.05055	-0.175116	-0.421494	-0.728577	-0.97508	-1.09427	-1.15044	-1.21008	-1.31735	-1.41329	-1.54969	-1.62465	-1.64904	-1.62688	-1.56285	-1.51436	-1.52842
1.58381	1.52905	1.39035	1.2202	1.04465	0.956767	1.0062	1.09017	1.12513	1.06958	0.896997	0.662733	0.458734	0.317563	0.251179	0.300992	0.378179	0.510198	0.650624	0.790968	0.87168	0.896478	0.831064	0.682283	0.541799	0.440929	0.49295	0.546531	0.615358	0.570394	0.402977	0.155649	-0.0445715	-0.25409	-0.373362	-0.405582	-0.348246	-0.278971	-0.133638	0.0556815	0.157592	0.117368	-0.010692	-0.109204	-0.199192	-0.265416	-0.355606	-0.480479	-0.618367	-0.659803
-0.0313893	-0.161107	-0.296709	-0.41307	-0.44917	-0.401598	-0.270865	-0.0698746	0.115662	0.237896	0.322886	0.33185	0.262358	0.168157	0.125136	0.123438	0.182975	0.309045	0.476312	0.580187	0.577859	0.491277	0.367305	0.212556	0.0659866	-0.0396895	-0.0800724	-0.0728658	-0.0350784	-0.0537322	-0.170757	-0.264524	-0.23307	-0.0744924	0.147684	0.39511	0.601231	0.809058	1.00872	1.21634	1.34816	1.36659	1.22862	0.970151	0.624811	0.284063	-0.017009	-0.167876	-0.254355	-0.276396
-0.407616	-0.244766	-0.178425	-0.176407	-0.209268	-0.207719	-0.104652	0.0364325	0.1629	0.272643	0.365776	0.438014	0.481536	0.448651	0.414451	0.500106	0.669336	0.885214	0.92188	0.762455	0.497983	0.266226	0.177458	0.222735	0.361804	0.504893	0.648792	0.796555	0.920346	1.00308	1.03339	0.94322	0.707605	0.361502	-0.0957982	-0.566846	-0.953465	-1.11589	-1.03756	-0.875937	-0.688203	-0.52628	-0.495223	-0.593589	-0.664333	-0.675561	-0.577859	-0.416153	-0.265772	-0.127922
[truncated: 91 more columns]

## Sheet: E-Non-rewarded
0.0628074	0.243833	0.437859	0.620886	0.78288	0.945963	1.09576	1.1742	1.17528	1.04097	0.814725	0.598261	0.408326	0.29826	0.201894	0.163131	0.170752	0.169586	0.177331	0.131821	0.0203146	-0.148743	-0.251909	-0.229744	-0.12397	-0.04664	-0.0656799	-0.141336	-0.29436	-0.465018	-0.612277	-0.733701	-0.850982	-0.944821	-0.995652	-0.968488	-0.851934	-0.716188	-0.53933	-0.373128	-0.276837	-0.22483	-0.180591	-0.133078	-0.0643947	0.0378407	0.0863146	0.0303476	-0.143812	-0.390738
-1.13837	-1.05405	-0.933929	-0.811653	-0.737837	-0.695245	-0.652774	-0.607161	-0.541224	-0.443076	-0.39654	-0.450269	-0.617466	-0.854519	-1.08589	-1.24293	-1.28609	-1.18324	-0.935707	-0.628657	-0.288701	-0.0550057	0.0787557	0.0942739	0.0233478	-0.0952223	-0.220567	-0.265466	-0.258822	-0.242871	-0.189956	-0.0331325	0.151866	0.353097	0.533217	0.691315	0.836597	0.949939	1.09113	1.22384	1.30204	1.25276	1.10159	0.875062	0.620028	0.448967	0.376148	0.374538	0.409686	0.410173
-0.292855	-0.537663	-0.793023	-1.0583	-1.29677	-1.45122	-1.49497	-1.3907	-1.13974	-0.82844	-0.483777	-0.246845	-0.111231	-0.0954982	-0.167406	-0.287618	-0.414699	-0.46022	-0.453483	-0.437311	-0.383664	-0.224669	-0.0371091	0.166909	0.349523	0.50981	0.657104	0.772016	0.915163	1.04971	1.12899	1.07903	0.925765	0.696102	0.437536	0.264106	0.190279	0.188647	0.224282	0.224775	0.186842	0.152182	0.140082	0.154184	0.199708	0.255636	0.316438	0.342169	0.356271	0.358366
-0.883632	-1.01543	-1.17824	-1.34652	-1.46371	-1.48862	-1.38566	-1.13789	-0.830532	-0.490238	-0.256309	-0.122415	-0.106881	-0.177878	-0.296566	-0.422036	-0.46698	-0.460328	-0.444362	-0.391394	-0.234414	-0.0492322	0.1522	0.332499	0.490754	0.636181	0.749636	0.89097	1.02381	1.10209	1.05276	0.901436	0.674685	0.419397	0.248165	0.175274	0.173663	0.208845	0.209333	0.17188	0.137659	0.125713	0.139636	0.184583	0.239802	0.299833	0.325239	0.339161	0.34123	0.377446
0.279598	0.407686	0.570371	0.709281	0.790761	0.74757	0.598551	0.375255	0.123856	-0.0447664	-0.116547	-0.118134	-0.083487	-0.0830069	-0.119889	-0.153588	-0.165353	-0.151642	-0.107379	-0.0530016	0.00611489	0.0311329	0.0448433	0.0468805	0.0825445	0.089592	0.110014	0.136657	0.143391	0.126969	0.0316349	-0.132123	-0.381107	-0.537456	-0.498722	-0.291305	0.0390504	0.427049	0.799026	1.05661	1.21479	1.24219	1.13429	0.917734	0.584251	0.194381	-0.168295	-0.379714	-0.431582	-0.390887
0.331823	0.261097	0.141765	-0.0469827	-0.16521	-0.122188	0.0553512	0.338119	0.670226	0.98862	1.2091	1.34449	1.36795	1.27559	1.09023	0.804783	0.471074	0.160642	-0.020323	-0.0647193	-0.0298859	0.0540322	0.136885	0.159883	0.0959849	-0.0267952	-0.201669	-0.43025	-0.637615	-0.793182	-0.805847	-0.730075	-0.604771	-0.512208	-0.510439	-0.598563	-0.759915	-0.875307	-0.914215	-0.893473	-0.853368	-0.759684	-0.574268	-0.325147	-0.0541447	0.0929322	0.126531	0.00801794	-0.170497	-0.320834
0.266297	0.329286	0.427081	0.511199	0.524877	0.445696	0.29233	0.0738943	-0.211629	-0.47065	-0.66497	-0.68079	-0.586142	-0.429625	-0.314003	-0.311793	-0.421869	-0.623416	-0.767554	-0.816154	-0.790245	-0.740149	-0.623127	-0.391523	-0.0803431	0.258168	0.441883	0.483852	0.335816	0.112832	-0.0749562	-0.115725	-0.00386641	0.216906	0.484191	0.648906	0.739699	0.727014	0.698195	0.638901	0.542498	0.346302	0.128353	-0.0460515	-0.0992016	-0.0383636	0.0716377	0.211917	0.266531	0.254441
-0.386337	-0.44139	-0.46975	-0.409246	-0.205012	0.0959877	0.440277	0.627128	0.669814	0.51925	0.29246	0.101467	0.060002	0.17377	0.398311	0.670159	0.837685	0.930029	0.917127	0.887816	0.82751	0.729461	0.529916	0.308246	0.130865	0.0768073	0.138684	0.250563	0.393237	0.448783	0.436487	0.426847	0.466021	0.542449	0.588916	0.546729	0.409212	0.191982	-0.0682054	-0.348358	-0.569484	-0.705689	-0.76337	-0.761669	-0.785439	-0.7736	-0.735957	-0.686549	-0.632019	-0.576819
-0.541052	-0.613627	-0.645463	-0.614877	-0.531531	-0.427094	-0.255552	-0.0588759	0.117823	0.234329	0.208994	0.152485	0.0965341	0.0700312	0.0641479	-0.0263242	-0.181922	-0.36277	-0.452937	-0.422965	-0.263656	-0.136591	-0.0835966	-0.0667385	-0.0332355	0.0342681	0.0656571	0.0684422	0.049266	0.0904682	0.14097	0.148952	0.0226916	-0.246772	-0.538585	-0.797659	-0.893625	-0.852729	-0.661113	-0.486824	-0.318083	-0.187936	-0.0602943	0.0454255	0.175884	0.29505	0.388287	0.465008	0.46777	0.49867
0.609992	0.524356	0.491354	0.51724	0.542456	0.499596	0.381631	0.167851	-0.0423886	-0.212992	-0.324783	-0.372198	-0.420249	-0.480444	-0.53193	-0.534411	-0.447628	-0.247744	0.0159621	0.312213	0.44101	0.41115	0.258835	0.11485	0.00740801	-0.0325771	-0.0132472	0.00907988	0.0413765	0.147029	0.360085	0.54763	0.619176	0.472839	0.206896	-0.0843049	-0.198695	-0.136125	0.0101277	0.094374	0.0585949	-0.0667713	-0.212382	-0.235746	-0.107983	0.0978545	0.190327	0.0786817	-0.137756	-0.293339
0.180221	0.0139351	-0.123007	-0.237116	-0.319059	-0.356808	-0.403963	-0.463038	-0.513565	-0.516	-0.430833	-0.23467	0.0241266	0.314862	0.441262	0.411958	0.262478	0.121174	0.0157317	-0.0235089	-0.00453893	0.0173725	0.0490679	0.152754	0.361843	0.545897	0.61611	0.472498	0.211506	-0.0742738	-0.186534	-0.125129	0.0184008	0.101079	0.0659657	-0.0570665	-0.199966	-0.222895	-0.0975109	0.104494	0.195245	0.0856785	-0.126729	-0.279416	-0.330979	-0.27229	-0.177115	-0.0917309	-0.103343	-0.194088
-1.22183	-1.02622	-0.809566	-0.623916	-0.443926	-0.303834	-0.204976	-0.199058	-0.2179	-0.267285	-0.327122	-0.367105	-0.417803	-0.373164	-0.278194	-0.102934	0.07178	0.201549	0.206822	0.171086	0.118241	0.135348	0.250329	0.331207	0.449739	0.551029	0.588879	0.584418	0.538094	0.507874	0.496913	0.486453	0.481662	0.450529	0.431441	0.375323	0.351151	0.342125	0.351084	0.375473	0.407484	0.379125	0.253893	0.080426	-0.117547	-0.247013	-0.273653	-0.197243	-0.0840921	0.00547645
0.268057	0.29339	0.367921	0.479404	0.591393	0.673081	0.734805	0.816894	0.853077	0.800573	0.707819	0.60842	0.508371	0.431828	0.349992	0.293992	0.29603	0.346413	0.435571	0.473998	0.42394	0.24488	0.0575322	-0.0630189	-0.0773836	-0.0144838	0.0788035	0.140274	0.0653953	-0.0433897	-0.152153	-0.179184	-0.166585	-0.198211	-0.271209	-0.390404	-0.497535	-0.542227	-0.523427	-0.4641	-0.329666	-0.120344	-0.000829413	-0.0276283	-0.21664	-0.512773	-0.735287	-0.78805	-0.648771	-0.394109
0.423469	0.187083	0.0260538	-0.0845619	-0.112645	-0.0966719	-0.125904	-0.193378	-0.303553	-0.402577	-0.443886	-0.426509	-0.371672	-0.247411	-0.0539305	0.0565401	0.0317693	-0.142939	-0.416661	-0.622337	-0.671107	-0.542368	-0.306978	-0.0925962	-0.0392419	-0.131535	-0.326323	-0.544007	-0.602507	-0.536981	-0.368985	-0.213099	-0.11604	-0.0788957	-0.0757114	-0.0676481	-0.116816	-0.221496	-0.398836	-0.565654	-0.6618	-0.662697	-0.533569	-0.306454	-0.0548362	0.17159	0.304299	0.311551	0.319997	0.393615
-0.266947	-0.0869089	-0.033905	-0.0978247	-0.275392	-0.537786	-0.72965	-0.775145	-0.655051	-0.435468	-0.235482	-0.185711	-0.271807	-0.453514	-0.65658	-0.711152	-0.650026	-0.493311	-0.347893	-0.257352	-0.222702	-0.219731	-0.21221	-0.258076	-0.355726	-0.521158	-0.676773	-0.766463	-0.7673	-0.646843	-0.43498	-0.200258	0.0109638	0.134761	0.141526	0.149405	0.21808	0.346696	0.509571	0.642733	0.713059	0.752045	0.733694	0.686308	0.688714	0.706025	0.714501	0.705786	0.619045	0.546574
-1.14457	-0.903066	-0.682191	-0.529117	-0.442362	-0.411024	-0.408028	-0.400443	-0.446697	-0.545175	-0.712009	-0.868943	-0.959392	-0.960237	-0.838759	-0.6251	-0.38839	-0.175379	-0.0505329	-0.04371	-0.0357645	0.033492	0.163198	0.327453	0.461743	0.532665	0.571981	0.553475	0.505688	0.508114	0.525571	0.53412	0.52533	0.437854	0.364769	0.394245	0.453073	0.532104	0.593128	0.562476	0.463673	0.274934	0.0756232	-0.0745053	-0.182008	-0.262992	-0.288887	-0.334321	-0.374856	-0.41872
-0.712947	-0.751128	-0.794742	-0.81245	-0.794316	-0.685671	-0.448277	-0.148319	0.196113	0.511181	0.77993	0.956188	1.02468	0.98209	0.814526	0.549473	0.248314	-0.0118376	-0.173954	-0.218203	-0.277086	-0.332831	-0.364598	-0.253288	0.0102742	0.300162	0.527887	0.608366	0.565886	0.481583	0.394275	0.267465	0.0685742	-0.252136	-0.611575	-0.851158	-0.941532	-0.91954	-0.855707	-0.82616	-0.804048	-0.749854	-0.646945	-0.494911	-0.307402	-0.144309	0.0329141	0.203043	0.362808	0.499876
-1.34819	-1.19507	-1.07788	-0.990137	-0.96101	-0.945614	-0.889835	-0.783916	-0.627434	-0.434439	-0.266576	-0.0841684	0.0909375	0.255376	0.396453	0.403476	0.312549	0.238797	0.201278	0.222144	0.283758	0.336055	0.308096	0.268522	0.196075	0.13009	0.0763163	0.00501363	-0.0344223	-0.0607256	-0.0571471	-0.0343866	-0.0110087	-0.00691715	-0.00974681	-0.0135598	-0.0838563	-0.148307	-0.183588	-0.144737	-0.0704028	0.0263216	0.102493	0.189975	0.238376	0.309741	0.396299	0.463419	0.452985	0.339586
0.123029	0.0543859	-0.137695	-0.439988	-0.789582	-1.08394	-1.21047	-1.15966	-0.977443	-0.733458	-0.480665	-0.303608	-0.191383	-0.0919152	-0.00272054	0.105329	0.202184	0.298276	0.312902	0.268852	0.154082	0.021588	-0.142834	-0.232753	-0.277611	-0.249872	-0.170711	-0.0614729	-0.0233384	-0.0867093	-0.17253	-0.237112	-0.229095	-0.125197	0.0149664	0.0977133	0.0768095	-0.0225542	-0.168774	-0.257676	-0.206497	0.0409104	0.440462	0.905008	1.26699	1.36487	1.21099	0.933169	0.597518	0.340265
-0.389395	-0.267705	-0.160743	-0.0421611	0.0620901	0.161456	0.176614	0.13096	0.0120125	-0.125306	-0.295714	-0.388907	-0.435398	-0.40665	-0.324606	-0.211391	-0.171868	-0.237546	-0.326491	-0.393425	-0.385115	-0.277434	-0.132168	-0.0464089	-0.0680737	-0.171055	-0.322598	-0.414737	-0.361695	-0.10528	0.308819	0.790277	1.16544	1.26688	1.1074	0.819464	0.471592	0.204973	0.0334428	-0.0110951	-0.0420688	-0.0415182	-0.0415755	-0.0386848	-0.0187318	-0.0369388	-0.0783352	-0.194394	-0.356507	-0.459389
0.0349666	0.0448164	0.072148	0.127249	0.119296	0.067589	-0.0497032	-0.18511	-0.353147	-0.445042	-0.490887	-0.462539	-0.381637	-0.269997	-0.231024	-0.295788	-0.383495	-0.449498	-0.441304	-0.335122	-0.191877	-0.107312	-0.128675	-0.230223	-0.379657	-0.470513	-0.41821	-0.165363	0.242973	0.71773	1.08767	1.1877	1.03044	0.74651	0.403481	0.140572	-0.0285711	-0.0724892	-0.103032	-0.102489	-0.102545	-0.099695	-0.0800196	-0.0979732	-0.138793	-0.253237	-0.413094	-0.514544	-0.542162	-0.492015
0.360399	0.221424	0.0934525	-0.0562326	-0.20302	-0.37062	-0.461416	-0.506712	-0.478703	-0.398769	-0.288465	-0.249958	-0.313948	-0.400605	-0.465818	-0.457722	-0.35281	-0.21128	-0.127726	-0.148833	-0.249166	-0.396813	-0.486582	-0.434904	-0.185083	0.218368	0.687445	1.05296	1.15179	0.996417	0.715881	0.376955	0.117192	-0.0499273	-0.0933199	-0.123497	-0.122961	-0.123017	-0.1202	-0.10076	-0.118499	-0.158831	-0.271906	-0.429849	-0.530086	-0.557374	-0.507826	-0.410131	-0.271312	-0.126136
-0.643704	-0.60591	-0.491801	-0.371284	-0.303462	-0.331267	-0.428121	-0.570648	-0.657304	-0.607418	-0.366259	0.0232019	0.476015	0.828853	0.924262	0.774274	0.503465	0.176291	-0.0744653	-0.23579	-0.277678	-0.306809	-0.306291	-0.306345	-0.303626	-0.284861	-0.301984	-0.340918	-0.450072	-0.602539	-0.6993	-0.725642	-0.677812	-0.583504	-0.449499	-0.309356	-0.158052	-0.0451231	0.0669951	0.220192	0.369794	0.473711	0.48908	0.419145	0.344724	0.345053	0.383082	0.432783	0.418529	0.388224
-0.105021	-0.153812	-0.218097	-0.273813	-0.28818	-0.228888	-0.1141	0.0370774	0.199766	0.346055	0.425436	0.4822	0.488758	0.461943	0.431079	0.456468	0.519749	0.63504	0.767248	0.852762	0.888096	0.870687	0.828335	0.787417	0.710166	0.628743	0.593579	0.510853	0.384934	0.21307	0.0623832	-0.0171283	0.0159135	0.159392	0.403153	0.628712	0.758658	0.769232	0.644326	0.356867	-0.0507274	-0.56179	-1.0423	-1.40548	-1.62523	-1.67187	-1.56411	-1.34845	-1.09003	-0.823733
0.806249	0.92039	0.946766	0.906047	0.802107	0.669983	0.528184	0.379012	0.233558	0.115499	0.00872182	-0.0678041	-0.150613	-0.228515	-0.286084	-0.280108	-0.161378	-0.0555696	0.0245021	-0.0483432	-0.218736	-0.383741	-0.441857	-0.42001	-0.296055	-0.111916	0.0538292	0.192862	0.26296	0.297393	0.353062	0.409296	0.398712	0.381242	0.293749	0.215033	0.123279	0.0915334	0.0613555	0.0822291	0.0882788	0.0961862	0.0407083	-0.0774567	-0.150245	-0.140424	-0.0736329	-0.0463655	0.011172	0.02479
0.624646	0.540943	0.441301	0.324614	0.213359	0.108537	0.0268853	-0.0614708	-0.144591	-0.206016	-0.199639	-0.072956	0.0399393	0.125374	0.0476497	-0.134157	-0.310214	-0.372223	-0.348912	-0.216654	-0.0201812	0.156666	0.305012	0.379804	0.416544	0.475942	0.535942	0.52465	0.506009	0.412656	0.328667	0.230767	0.196895	0.164696	0.186968	0.193423	0.20186	0.142666	0.0165861	-0.0610777	-0.0505994	0.0206661	0.0497598	0.111151	0.125682	0.0749743	-0.0827579	-0.296796	-0.499526	-0.58294
0.276012	0.318737	0.331047	0.214973	0.0295134	-0.135429	-0.192068	-0.170775	-0.0499726	0.129484	0.291014	0.426511	0.494826	0.528384	0.582637	0.637441	0.627126	0.6101	0.524833	0.448118	0.358697	0.327759	0.298349	0.318691	0.324587	0.332294	0.278226	0.163066	0.092129	0.1017	0.166793	0.193367	0.249441	0.262713	0.216398	0.0723266	-0.123173	-0.308345	-0.384534	-0.38729	-0.351407	-0.315828	-0.34208	-0.370132	-0.369861	-0.316647	-0.259094	-0.190801	-0.197141	-0.270957
0.501557	0.432771	0.339545	0.314621	0.283489	0.301205	0.307476	0.315672	0.258164	0.135675	0.0602225	0.0704025	0.139639	0.167904	0.227547	0.241663	0.1924	0.0391598	-0.168783	-0.36574	-0.446778	-0.44971	-0.411543	-0.373699	-0.401622	-0.43146	-0.431171	-0.374571	-0.313354	-0.240715	-0.247458	-0.325972	-0.435814	-0.548035	-0.606752	-0.641065	-0.614065	-0.606739	-0.576211	-0.561851	-0.469954	-0.284895	-0.000190628	0.274309	0.429979	0.470821	0.394668	0.2404	0.0470882	-0.121437
-0.609371	-0.639472	-0.654123	-0.63527	-0.568816	-0.505341	-0.434365	-0.440953	-0.51767	-0.624998	-0.73465	-0.792023	-0.82555	-0.799168	-0.79201	-0.762181	-0.748149	-0.658356	-0.477533	-0.199346	0.0688695	0.220977	0.260884	0.186473	0.0357367	-0.15315	-0.317817	-0.420437	-0.407768	-0.29971	-0.166053	-0.0493073	0.0625889	0.187906	0.370392	0.681636	1.0723	1.43867	1.67994	1.72592	1.52199	1.18514	0.816913	0.499483	0.25817	0.13915	0.117482	0.178695	0.209515	0.217187
0.509386	0.484387	0.488949	0.473191	0.372804	0.175114	-0.0943654	-0.293208	-0.354039	-0.310553	-0.142665	0.0801887	0.327136	0.514825	0.635773	0.637688	0.54617	0.419786	0.396048	0.460262	0.610245	0.806456	0.952658	0.989964	0.965496	0.865433	0.707566	0.511011	0.290054	0.076856	-0.0756189	-0.192058	-0.326571	-0.510075	-0.725942	-0.889245	-0.945889	-0.853706	-0.743756	-0.610771	-0.528461	-0.479401	-0.456342	-0.415932	-0.384868	-0.334458	-0.243074	-0.134149	-0.0532859	-0.048764
0.540354	0.372815	0.142939	-0.11579	-0.309025	-0.404844	-0.451221	-0.413384	-0.354564	-0.282291	-0.229313	-0.244457	-0.297007	-0.382002	-0.377987	-0.327128	-0.217883	-0.0895938	0.00936586	0.0861127	0.106574	0.0995307	0.0678642	0.077795	0.121734	0.210087	0.274489	0.333948	0.435233	0.584488	0.702802	0.761011	0.751782	0.624927	0.467383	0.306276	0.171931	0.0605186	0.0351559	0.0700614	0.117119	0.0809383	0.00871627	-0.0111652	0.059921	0.295321	0.550953	0.680777	0.697488	0.577959
-0.11539	-0.23305	-0.26162	-0.251835	-0.208837	-0.168881	-0.184054	-0.236707	-0.321869	-0.317847	-0.266887	-0.157428	-0.0288864	0.0702677	0.147165	0.167667	0.16061	0.128881	0.138831	0.182857	0.271383	0.335912	0.395487	0.496972	0.646519	0.765066	0.82339	0.814143	0.687038	0.529184	0.367762	0.233152	0.121521	0.0961084	0.131083	0.178233	0.141981	0.0696168	0.0496963	0.120922	0.356784	0.612919	0.742998	0.759742	0.639978	0.456445	0.250376	-0.000917908	-0.249839	-0.496587
-0.313203	-0.485165	-0.686047	-0.913886	-1.07601	-1.07276	-0.851279	-0.50211	-0.10066	0.203748	0.33042	0.335919	0.27509	0.188774	0.0734204	0.0453779	0.0897129	0.172724	0.201873	0.179219	0.115231	0.0295785	-0.0265151	-0.0801276	-0.123866	-0.140511	-0.113429	-0.0284994	0.0980777	0.245354	0.338116	0.307264	0.232223	0.176267	0.193726	0.318823	0.495148	0.726773	0.838238	0.789046	0.628717	0.37625	0.086467	-0.132578	-0.196201	-0.0765984	0.148999	0.304099	0.323856	0.157765
0.739203	0.636889	0.574418	0.50898	0.441303	0.32792	0.197363	0.0910378	-0.0329928	-0.153896	-0.233928	-0.272105	-0.265936	-0.253799	-0.274984	-0.312404	-0.400727	-0.525262	-0.597685	-0.59692	-0.585716	-0.581804	-0.554307	-0.475067	-0.369428	-0.217361	-0.0773724	0.0618503	0.134197	0.161457	0.109863	-0.00515092	-0.129298	-0.175179	-0.131972	-0.0445538	0.0462751	0.0943804	0.0979273	0.0667044	0.073657	0.0867981	0.0260428	-0.109812	-0.299491	-0.478827	-0.617161	-0.715577	-0.764284	-0.796182
-0.399942	-0.331945	-0.181551	0.0131443	0.197646	0.295646	0.247968	0.0845872	-0.12919	-0.308999	-0.430623	-0.495292	-0.560005	-0.586841	-0.630622	-0.69514	-0.712553	-0.668573	-0.599097	-0.495569	-0.423817	-0.436973	-0.541622	-0.661417	-0.743536	-0.742901	-0.656569	-0.54466	-0.435008	-0.389239	-0.305754	-0.0950804	0.288172	0.749659	1.19199	1.43101	1.4344	1.30722	1.17624	1.08324	1.0222	0.977536	0.89659	0.726546	0.532687	0.38907	0.334415	0.344274	0.350707	0.356389
0.710229	0.644566	0.550181	0.481144	0.462427	0.476414	0.532157	0.435409	0.259877	0.0347744	-0.173853	-0.304606	-0.303198	-0.220541	-0.137381	-0.163759	-0.288944	-0.371957	-0.410896	-0.336705	-0.218711	-0.128172	-0.129158	-0.135648	-0.146424	-0.111167	-0.0744859	-0.0734425	-0.0649748	-0.0280678	0.0415169	0.159061	0.302129	0.384733	0.422096	0.334424	0.116728	-0.188967	-0.449338	-0.619898	-0.660175	-0.596547	-0.519166	-0.385252	-0.24733	-0.152884	-0.0805752	-0.0973185	-0.204139	-0.296771
0.0923663	0.123632	0.157543	0.146474	0.133954	0.180104	0.247584	0.315585	0.267579	0.140267	-0.0710741	-0.254861	-0.350887	-0.268351	-0.0867402	0.120841	0.291643	0.380237	0.348297	0.305603	0.268577	0.314192	0.405439	0.486182	0.628613	0.74623	0.87815	0.999016	0.998247	0.86912	0.618905	0.328026	0.0482635	-0.101713	-0.237346	-0.257069	-0.275861	-0.279159	-0.241193	-0.163393	-0.075774	-0.00477898	0.0182629	-0.0646231	-0.195153	-0.348641	-0.434578	-0.444524	-0.428024	-0.44463
-0.421325	-0.163449	0.077632	0.29124	0.449367	0.532963	0.502015	0.460646	0.424768	0.468968	0.557384	0.635621	0.773632	0.887599	1.01543	1.13254	1.1318	1.00668	0.764226	0.482373	0.211292	0.065969	-0.0654549	-0.0845661	-0.102775	-0.105971	-0.0691831	0.00620264	0.0911031	0.159895	0.182222	0.101908	-0.0245717	-0.173296	-0.256567	-0.266204	-0.250216	-0.266307	-0.315838	-0.377491	-0.444889	-0.454322	-0.429754	-0.399075	-0.365835	-0.300705	-0.21409	-0.120427	-0.108787	-0.152192
0.245257	0.151919	0.0236425	-0.10147	-0.166257	-0.166817	-0.138243	-0.161452	-0.245452	-0.402567	-0.570446	-0.72485	-0.816224	-0.8006	-0.661832	-0.439524	-0.280916	-0.224084	-0.32799	-0.443443	-0.559219	-0.544205	-0.412399	-0.124398	0.224401	0.527437	0.731183	0.784899	0.707309	0.596594	0.551785	0.585794	0.675996	0.692564	0.64431	0.578001	0.482428	0.330444	0.166442	0.00571743	-0.156596	-0.269105	-0.276606	-0.231787	-0.126609	-0.0355366	0.0469359	0.128906	0.135752	0.0416133
0.470756	0.637854	0.743795	0.751139	0.648555	0.53653	0.489435	0.525179	0.61998	0.637392	0.586678	0.516989	0.416543	0.25681	0.0844479	-0.0844709	-0.25506	-0.373304	-0.381187	-0.334084	-0.223544	-0.127828	-0.0411511	0.0449982	0.0521925	-0.046745	-0.248107	-0.427939	-0.47488	-0.377905	-0.146643	0.0786632	0.178639	0.157318	0.110612	0.0781409	0.0403143	-0.0456695	-0.177479	-0.32123	-0.492852	-0.598083	-0.572915	-0.495533	-0.441682	-0.463429	-0.49428	-0.4989	-0.44349	-0.382768
0.119588	-0.0744968	-0.256907	-0.365297	-0.401004	-0.350134	-0.285984	-0.231647	-0.258202	-0.328669	-0.344612	-0.247323	0.00418251	0.308693	0.583147	0.721043	0.719568	0.507494	0.197158	-0.117457	-0.319062	-0.302787	0.00165544	0.415325	0.779811	0.980451	1.0071	0.958784	0.931881	0.979806	1.01439	0.959477	0.760579	0.465343	0.152961	-0.102393	-0.237889	-0.283049	-0.313254	-0.354347	-0.316291	-0.181654	0.0344113	0.21275	0.290402	0.233109	0.0465961	-0.22327	-0.516072	-0.743061
0.469922	0.62451	0.754934	0.803372	0.763124	0.554791	0.262586	-0.0336474	-0.223473	-0.208149	0.0785063	0.468007	0.811197	1.00012	1.0252	0.979714	0.954383	0.999508	1.03207	0.980366	0.793089	0.515103	0.220972	-0.0194634	-0.147043	-0.189564	-0.218004	-0.256697	-0.220864	-0.0940932	0.109348	0.277268	0.350382	0.296437	0.120821	-0.133278	-0.408973	-0.6227	-0.735648	-0.705559	-0.595031	-0.480843	-0.372592	-0.331409	-0.343214	-0.386145	-0.457141	-0.568263	-0.704148	-0.872492
-0.702263	-0.528988	-0.339834	-0.158273	-0.0198602	0.0989125	0.149381	0.176512	0.213055	0.213744	0.130082	-0.0569737	-0.257781	-0.400187	-0.469463	-0.469564	-0.381746	-0.338575	-0.264497	-0.166206	-0.0289888	0.0482381	0.0076344	-0.0796154	-0.119129	-0.0761503	0.0480087	0.232785	0.432491	0.608677	0.709435	0.784461	0.797163	0.740171	0.590745	0.430765	0.345913	0.377042	0.505531	0.64629	0.680295	0.607204	0.509941	0.41924	0.289782	0.0879673	-0.209403	-0.481494	-0.696266	-0.782464
-0.51879	-0.58025	-0.59516	-0.527396	-0.432629	-0.333654	-0.313479	-0.402586	-0.638684	-0.890461	-1.04571	-1.02118	-0.872578	-0.69994	-0.565517	-0.580195	-0.642991	-0.699969	-0.718587	-0.663013	-0.554552	-0.417398	-0.234654	-0.0570481	0.0827635	0.161121	0.163467	0.113652	0.0398586	-0.10197	-0.251661	-0.348767	-0.353282	-0.275514	-0.112879	0.0463218	0.133493	0.133345	0.0929772	0.0803704	0.10622	0.183558	0.248388	0.296696	0.288482	0.289908	0.30579	0.354581	0.364728	0.34075
-0.183561	-0.0710549	0.0660499	0.187015	0.236627	0.15478	0.000358688	-0.149974	-0.228151	-0.291421	-0.343103	-0.339376	-0.329785	-0.386893	-0.518998	-0.651577	-0.736265	-0.701065	-0.594503	-0.492768	-0.397679	-0.357248	-0.276758	-0.101723	0.128245	0.358035	0.490855	0.481016	0.409059	0.385406	0.452593	0.592109	0.720286	0.722771	0.604004	0.407917	0.214566	0.0854292	0.0625886	0.13468	0.273454	0.422905	0.542427	0.556024	0.526236	0.445429	0.400614	0.334051	0.219835	0.0635335
0.4663	0.476711	0.421119	0.36965	0.297106	0.259372	0.208023	0.119911	-0.000668242	-0.107624	-0.0998458	0.0137872	0.123213	0.144652	0.0163585	-0.20504	-0.462549	-0.695977	-0.843258	-0.886794	-0.858147	-0.828457	-0.827701	-0.899722	-0.991811	-1.00235	-0.925022	-0.728345	-0.476771	-0.264481	-0.101794	-0.0209387	-0.0293095	-0.0745364	-0.13017	-0.188696	-0.216428	-0.283731	-0.42596	-0.579926	-0.656383	-0.579788	-0.354511	-0.0958914	0.150475	0.375805	0.575279	0.801243	1.04457	1.25008
-0.00852169	-0.01813	-0.0230314	-0.0214314	-0.0192075	-0.0211359	0.00847258	0.0905282	0.212662	0.338235	0.396433	0.458488	0.54862	0.578983	0.538099	0.447272	0.296692	0.126246	-0.0140425	-0.156945	-0.301286	-0.454643	-0.614288	-0.72709	-0.766447	-0.799158	-0.834374	-0.826394	-0.750863	-0.569575	-0.327319	-0.0995024	0.0492208	0.0571712	-0.0666342	-0.200167	-0.279567	-0.227099	-0.063995	0.102991	0.192274	0.193981	0.0647783	-0.0481693	-0.126108	-0.0431743	0.132764	0.258742	0.275273	0.168129
-0.362887	-0.488256	-0.539493	-0.50036	-0.379385	-0.227616	-0.109234	-0.0525208	-0.079611	-0.113911	-0.151739	-0.169801	-0.16954	-0.195534	-0.243142	-0.291593	-0.313182	-0.319659	-0.338014	-0.409071	-0.45728	-0.527721	-0.561812	-0.665101	-0.859049	-1.12309	-1.36545	-1.44679	-1.31473	-1	-0.642395	-0.33507	-0.167119	-0.0983581	-0.109386	-0.148408	-0.166004	-0.158566	-0.0938425	0.0513246	0.232201	0.447395	0.649287	0.867542	1.06868	1.1828	1.14553	0.938837	0.662589	0.409084
-0.39314	-0.275737	-0.105887	0.0590651	0.249441	0.387613	0.440639	0.400566	0.27415	0.175739	0.133671	0.145	0.148439	0.16943	0.19058	0.250069	0.26527	0.248713	0.192911	0.111006	0.0333962	0.049891	0.131169	0.246249	0.306541	0.214106	0.0683642	-0.0829622	-0.171187	-0.188445	-0.206882	-0.230434	-0.257281	-0.331978	-0.374102	-0.330648	-0.23599	-0.126201	0.0277207	0.163706	0.342692	0.539789	0.671615	0.669473	0.422063	0.101881	-0.213026	-0.414685	-0.452885	-0.387102
0.256958	0.0753621	-0.0755602	-0.19857	-0.264919	-0.271928	-0.288903	-0.310588	-0.335307	-0.404081	-0.442866	-0.402857	-0.315703	-0.214618	-0.0729002	0.0523042	0.2171	0.39857	0.519944	0.517972	0.290178	-0.0046192	-0.29456	-0.480231	-0.515402	-0.454834	-0.425934	-0.467133	-0.53192	-0.61684	-0.581571	-0.483751	-0.331928	-0.159082	-0.0122881	0.0582659	0.0929875	0.151264	0.221956	0.307155	0.305253	0.200323	0.0173071	-0.208544	-0.365447	-0.38643	-0.316576	-0.161041	-0.0263841	0.106709
0.976497	0.928345	0.890683	0.817968	0.677708	0.488701	0.269039	0.104839	-0.00449209	0.0221124	0.126464	0.209209	0.236212	0.207011	0.0951242	-0.105991	-0.335496	-0.529622	-0.61688	-0.607779	-0.553724	-0.50261	-0.476293	-0.414895	-0.233995	-0.0113477	0.245957	0.451398	0.534156	0.586578	0.60435	0.553606	0.483466	0.392858	0.342383	0.324293	0.271594	0.155714	-0.0550621	-0.296142	-0.444552	-0.445829	-0.367787	-0.274432	-0.267874	-0.259522	-0.254408	-0.289655	-0.365385	-0.405826
0.268207	0.0199945	-0.198845	-0.365252	-0.44063	-0.420672	-0.365508	-0.313346	-0.286488	-0.223831	-0.0392195	0.187995	0.450578	0.660235	0.744691	0.798188	0.816324	0.76454	0.69296	0.600494	0.548983	0.530521	0.476742	0.358484	0.143384	-0.102642	-0.254097	-0.255399	-0.175757	-0.0804865	-0.0737941	-0.0652705	-0.0600521	-0.0960214	-0.173306	-0.214576	-0.165407	-0.0799385	-0.0495277	-0.114387	-0.183032	-0.225604	-0.185842	-0.0885855	-0.0168909	-0.0256578	-0.15518	-0.325558	-0.426881	-0.413659
0.389736	0.370717	0.303013	0.187789	0.0937826	0.0474746	0.0842064	0.17405	0.24028	0.232182	0.112531	-0.0448604	-0.138461	-0.126247	-0.049562	0.0728397	0.130065	0.0586352	-0.0912728	-0.200182	-0.173588	-0.0608661	0.0716839	0.200233	0.197711	0.0857789	-0.0622386	-0.222626	-0.330075	-0.387336	-0.373817	-0.296969	-0.322554	-0.39315	-0.488252	-0.531198	-0.466408	-0.287145	-0.023875	0.18105	0.301927	0.268513	0.210124	0.109401	0.0863291	0.0753492	0.0635403	0.0351963	-0.132534	-0.388906
-0.231896	-0.316508	-0.406789	-0.459462	-0.396461	-0.310264	-0.20994	-0.132138	-0.0553235	0.0426087	0.226197	0.475735	0.69995	0.817748	0.835325	0.766484	0.628209	0.461371	0.263827	0.149247	0.0821448	0.00348329	-0.0540565	-0.0443836	0.0195835	0.10893	0.176711	0.164624	0.144328	0.150362	0.181388	0.244341	0.218677	0.116287	0.00148943	-0.0993699	-0.117365	-0.0640364	0.00582898	0.0934436	0.179464	0.201836	0.175938	0.0611459	-0.0686244	-0.157525	-0.204186	-0.172878	-0.0243258	0.150546
-0.927719	-0.906078	-0.83382	-0.676867	-0.46434	-0.286546	-0.142127	-0.0284166	0.114813	0.196696	0.259219	0.276358	0.266528	0.274188	0.357458	0.510721	0.615692	0.674396	0.65888	0.616713	0.512339	0.37515	0.245927	0.158263	0.112569	0.12202	0.123524	0.0527454	-0.0855894	-0.199581	-0.226323	-0.146997	0.00615515	0.240982	0.487033	0.641363	0.664191	0.542322	0.348608	0.211137	0.223746	0.38298	0.578331	0.611641	0.391506	-0.00376088	-0.436983	-0.728682	-0.896787	-0.919995
0.574817	0.709229	0.805494	0.87728	0.89804	0.911036	0.965521	1.00201	1.05097	1.07145	1.04247	0.981685	0.904074	0.818455	0.641269	0.356625	-0.0273635	-0.41126	-0.70342	-0.842087	-0.846887	-0.743002	-0.629235	-0.556391	-0.421825	-0.236711	-0.0368858	0.0868014	0.0905181	-0.0280023	-0.231464	-0.493029	-0.710116	-0.888729	-1.04276	-1.10095	-1.083	-0.980153	-0.816274	-0.650404	-0.521796	-0.370918	-0.196999	8.12744e-05	0.174557	0.21935	0.163291	0.0531371	-0.0520279	-0.0852811
0.834195	0.950357	0.998928	0.875664	0.596417	0.18508	-0.2458	-0.573716	-0.729354	-0.734741	-0.618142	-0.490452	-0.408693	-0.257658	-0.0498889	0.174392	0.313217	0.317388	0.184363	-0.0439994	-0.337577	-0.581231	-0.781705	-0.954588	-1.0199	-0.999748	-0.884317	-0.700382	-0.514211	-0.369864	-0.200521	-0.00531645	0.215883	0.411712	0.461987	0.399067	0.275432	0.157397	0.120074	0.130696	0.131701	0.0302611	-0.0861085	-0.149855	-0.0531827	0.180412	0.438042	0.607028	0.638228	0.556128
-0.490678	-0.426986	-0.385944	-0.307458	-0.20839	-0.0684984	0.117631	0.297469	0.50969	0.715358	0.854829	0.899837	0.902945	0.885909	0.879166	0.862283	0.810696	0.629395	0.304426	-0.100317	-0.44947	-0.62061	-0.593763	-0.388375	-0.112523	0.137524	0.266513	0.320529	0.356676	0.4472	0.583761	0.668908	0.688407	0.593453	0.402158	0.255439	0.170453	0.140352	0.0465747	-0.0799968	-0.294041	-0.483026	-0.617911	-0.629597	-0.549996	-0.468312	-0.357724	-0.294373	-0.290462	-0.381227
-0.474234	-0.369215	-0.253231	-0.105472	0.079566	0.26084	0.473241	0.679083	0.818672	0.863718	0.866828	0.849777	0.84303	0.826132	0.774501	0.593047	0.267803	-0.137282	-0.48673	-0.658015	-0.631145	-0.425584	-0.149499	0.10076	0.229858	0.28392	0.320098	0.410698	0.547374	0.632593	0.652109	0.557075	0.365618	0.218775	0.133717	0.10359	0.0097338	-0.116945	-0.33117	-0.520314	-0.655314	-0.667009	-0.587341	-0.505588	-0.394907	-0.331502	-0.327588	-0.41843	-0.60654	-0.761212
0.122078	0.183727	0.269774	0.421628	0.594077	0.720055	0.764027	0.767063	0.750419	0.743832	0.727337	0.676937	0.499809	0.182318	-0.213111	-0.554228	-0.72143	-0.695201	-0.49454	-0.225036	0.0192566	0.145277	0.19805	0.233366	0.321806	0.455224	0.538412	0.557463	0.464694	0.277801	0.134458	0.0514281	0.0220197	-0.0695995	-0.193258	-0.402376	-0.587012	-0.718794	-0.73021	-0.652441	-0.572637	-0.464594	-0.402701	-0.39888	-0.487556	-0.671183	-0.822168	-0.883297	-0.836309	-0.771083
0.0891332	0.241652	0.429278	0.612849	0.739339	0.781885	0.784924	0.768268	0.761677	0.745171	0.694737	0.517491	0.199788	-0.195905	-0.53725	-0.704564	-0.678317	-0.477522	-0.207838	0.0366178	0.162722	0.215531	0.25087	0.339369	0.472877	0.55612	0.575183	0.482353	0.295335	0.151897	0.0688107	0.0393827	-0.0522977	-0.176039	-0.385297	-0.570056	-0.701925	-0.71335	-0.635528	-0.555671	-0.447556	-0.385621	-0.381798	-0.470534	-0.654283	-0.805369	-0.866539	-0.819519	-0.75425	-0.690454
0.527241	0.424023	0.324774	0.236841	0.209706	0.181167	0.2379	0.304239	0.403996	0.511938	0.528556	0.445805	0.336076	0.250484	0.254814	0.280487	0.22999	0.0726745	-0.229335	-0.525091	-0.735958	-0.780174	-0.653978	-0.390632	-0.116935	0.113622	0.201041	0.193876	0.0317515	-0.178406	-0.39501	-0.531723	-0.575353	-0.484304	-0.309659	-0.137071	-0.0941797	-0.191459	-0.363303	-0.53486	-0.620529	-0.621237	-0.592158	-0.509865	-0.323723	-0.0312932	0.294158	0.530932	0.618018	0.555481
-0.830905	-0.655068	-0.422437	-0.197148	-0.00595665	0.0661065	0.0592705	-0.0954091	-0.295915	-0.502573	-0.633008	-0.674635	-0.587766	-0.421142	-0.256479	-0.215557	-0.30837	-0.472323	-0.636001	-0.717735	-0.718412	-0.690667	-0.612154	-0.43456	-0.155559	0.154947	0.380848	0.463935	0.404269	0.263213	0.0644055	-0.130467	-0.258397	-0.294721	-0.171436	-0.0104422	0.137455	0.198982	0.240978	0.293731	0.39917	0.560416	0.721778	0.848905	0.869105	0.783188	0.660606	0.57961	0.550392	0.571489
-0.727923	-0.445778	-0.133815	0.158148	0.363349	0.435657	0.38146	0.253334	0.0727489	-0.104261	-0.220465	-0.25346	-0.141475	0.00476183	0.139102	0.19499	0.233136	0.281054	0.376829	0.523295	0.669866	0.78534	0.803689	0.725647	0.614301	0.540729	0.514189	0.533352	0.577268	0.673025	0.719791	0.7074	0.606048	0.419657	0.198484	-0.0230841	-0.199989	-0.236546	-0.113203	0.159219	0.438978	0.587283	0.516348	0.277932	-0.0844645	-0.390953	-0.550108	-0.576324	-0.504033	-0.494754
1.01727	0.93801	0.827234	0.677148	0.541422	0.457407	0.43073	0.449992	0.494134	0.590383	0.637389	0.624935	0.523061	0.335711	0.113401	-0.109307	-0.287122	-0.323867	-0.199889	0.0739334	0.355131	0.5042	0.4329	0.193257	-0.171003	-0.479068	-0.639042	-0.665393	-0.592729	-0.583403	-0.607705	-0.670568	-0.691403	-0.716399	-0.780387	-0.856654	-0.981094	-1.09871	-1.12995	-1.04394	-0.886184	-0.648063	-0.411004	-0.21156	-0.0350476	0.0703252	0.0993045	0.0920078	0.0613878	0.049361
0.703876	0.585151	0.494838	0.445865	0.437978	0.46419	0.508401	0.604803	0.651884	0.63941	0.537375	0.349728	0.127066	-0.0959945	-0.274091	-0.310894	-0.18672	0.0875361	0.369179	0.518484	0.447071	0.207049	-0.157788	-0.466341	-0.626568	-0.65296	-0.580182	-0.570841	-0.595182	-0.658144	-0.679012	-0.704047	-0.768137	-0.844525	-0.969162	-1.08696	-1.11825	-1.03211	-0.874101	-0.635603	-0.398169	-0.198409	-0.0216175	0.0839221	0.112947	0.105639	0.0749706	0.0629247	0.101126	0.213496
-0.256816	-0.125387	-0.0546888	-0.0925339	-0.196809	-0.335257	-0.399596	-0.355798	-0.2215	-0.0798556	-0.00149518	-0.0148146	-0.0731315	-0.132205	-0.109881	-0.0529681	0.0308174	0.167667	0.314185	0.525404	0.723395	0.842014	0.804235	0.621048	0.324558	0.0389077	-0.169783	-0.26731	-0.270506	-0.210191	-0.113081	0.0473371	0.220608	0.341821	0.420762	0.373817	0.193983	0.0147089	-0.0346566	0.0348605	0.15557	0.208869	0.146884	0.00700135	-0.136974	-0.198878	-0.206799	-0.25121	-0.329956	-0.402226
0.000126767	-0.00338417	0.0291374	0.0698223	0.13929	0.318324	0.530753	0.654474	0.631766	0.481228	0.292764	0.124219	-0.0419842	-0.176835	-0.27871	-0.34893	-0.32628	-0.246999	-0.101168	0.0654498	0.217121	0.337895	0.393238	0.36908	0.26013	0.105486	-0.0871394	-0.332749	-0.615316	-0.924363	-1.14577	-1.23592	-1.1242	-0.878868	-0.542081	-0.149259	0.172223	0.404148	0.478021	0.481924	0.44045	0.447268	0.428552	0.373725	0.22302	0.0705921	-0.0184784	-0.0824799	-0.0710436	-0.0123558
0.621021	0.52984	0.357867	0.132332	-0.179788	-0.544315	-0.850513	-1.01244	-0.998471	-0.830951	-0.525901	-0.144175	0.220829	0.504931	0.626947	0.570509	0.400171	0.232526	0.0637668	-0.0657072	-0.10524	-0.0424896	0.0997052	0.23948	0.326602	0.322532	0.334886	0.355926	0.449856	0.466454	0.380168	0.23306	0.0122852	-0.208495	-0.35226	-0.44208	-0.428831	-0.389168	-0.318345	-0.248137	-0.131637	-0.0155121	0.103947	0.195493	0.234429	0.191088	0.0938902	-0.00148292	-0.119375	-0.230274
0.0571745	0.199389	0.304047	0.366002	0.363656	0.29799	0.252901	0.251101	0.282676	0.334212	0.381817	0.404529	0.334905	0.174815	-0.0335542	-0.189225	-0.271771	-0.223823	-0.0890796	0.0884744	0.189912	0.227916	0.216233	0.179128	0.179814	0.17686	0.172128	0.104948	-0.030729	-0.196903	-0.289355	-0.2701	-0.118111	0.167271	0.554307	0.880334	1.04679	1.01151	0.83607	0.578372	0.294243	0.0304477	-0.164508	-0.245605	-0.272388	-0.326764	-0.382972	-0.40257	-0.382966	-0.328325
1.87711	1.79626	1.67877	1.49433	1.26289	0.994686	0.719923	0.464824	0.276295	0.197871	0.171972	0.119387	0.0650322	0.0460808	0.0650382	0.117878	0.128498	0.146204	0.145165	0.0842437	0.0343377	0.0149892	0.000961493	-0.0247969	-0.117577	-0.26936	-0.332097	-0.283569	-0.18672	-0.113119	-0.0929323	-0.0963971	-0.12253	-0.166988	-0.272824	-0.41692	-0.571602	-0.641695	-0.671209	-0.657757	-0.666152	-0.668725	-0.637544	-0.566964	-0.491475	-0.461153	-0.484125	-0.540808	-0.525704	-0.463214
0.474473	0.43464	0.335594	0.270589	0.242239	0.225149	0.193794	0.080856	-0.103906	-0.180274	-0.121201	-0.00331041	0.0862828	0.110855	0.106637	0.0748266	0.0207085	-0.108122	-0.283526	-0.471817	-0.557139	-0.593065	-0.576691	-0.586909	-0.590042	-0.552085	-0.466171	-0.37428	-0.33737	-0.365332	-0.434332	-0.415946	-0.339878	-0.256438	-0.20268	-0.157019	-0.111973	-0.0509131	0.0298811	0.109359	0.241796	0.411686	0.626136	0.825774	0.98751	1.09911	1.13477	1.09363	0.968183	0.782664
0.143244	0.186017	0.22516	0.289196	0.292483	0.253543	0.088894	-0.124093	-0.357936	-0.497594	-0.431917	-0.208759	0.139644	0.434831	0.581884	0.517252	0.299963	-0.0233918	-0.316344	-0.55412	-0.617348	-0.555276	-0.392804	-0.23628	-0.142558	-0.147109	-0.237412	-0.349485	-0.45285	-0.508943	-0.532263	-0.417027	-0.25394	-0.0205776	0.154722	0.259316	0.323951	0.350186	0.390605	0.406996	0.405719	0.401333	0.352819	0.217987	0.00114065	-0.196143	-0.359446	-0.44767	-0.445658	-0.316122
-0.820676	-0.792342	-0.724076	-0.590978	-0.432879	-0.270049	-0.0909103	0.0358771	0.0424793	-0.0322975	-0.171105	-0.273578	-0.266854	-0.173203	-0.033993	0.0444813	0.111265	0.146426	0.174041	0.198768	0.260303	0.386406	0.58912	0.82238	1.02549	1.11314	1.05228	0.907623	0.754856	0.608769	0.462551	0.248536	-0.0055671	-0.20461	-0.328084	-0.318077	-0.239239	-0.0606819	0.134854	0.305326	0.390715	0.416432	0.358151	0.24564	0.154811	0.134932	0.096344	0.00246703	-0.227112	-0.501971
0.57761	0.592758	0.622328	0.627035	0.61373	0.541448	0.427742	0.335948	0.315858	0.27686	0.181987	-0.0500303	-0.327807	-0.516017	-0.514532	-0.37979	-0.202694	-0.0471005	0.0750039	0.100313	0.0471745	-0.0479937	-0.195409	-0.256678	-0.224289	-0.0615993	0.0869193	0.204487	0.264396	0.269713	0.241772	0.291383	0.396107	0.525476	0.628632	0.651589	0.544821	0.322717	0.0862172	-0.0938672	-0.201862	-0.212487	-0.158379	-0.117709	-0.113261	-0.167689	-0.274658	-0.455155	-0.662965	-0.858099
0.503928	0.562412	0.536799	0.455918	0.38201	0.372454	0.333412	0.238428	0.0061417	-0.271958	-0.460386	-0.458899	-0.324	-0.146699	0.0090749	0.131321	0.156659	0.103459	0.00818071	-0.139406	-0.200746	-0.168319	-0.00544071	0.14325	0.260954	0.320932	0.326256	0.298283	0.347951	0.452796	0.582316	0.685592	0.708575	0.601684	0.379321	0.142547	-0.037746	-0.145866	-0.156503	-0.102333	-0.061615	-0.0571622	-0.111654	-0.218746	-0.399453	-0.607504	-0.802865	-0.912711	-0.912427	-0.818144
0.0313648	0.0949139	0.105084	0.0802736	0.00844899	-0.11538	-0.311467	-0.537227	-0.749217	-0.868413	-0.868105	-0.765797	-0.639526	-0.475488	-0.226091	0.0733502	0.377401	0.523897	0.500006	0.344306	0.0729958	-0.184096	-0.379856	-0.434822	-0.370604	-0.144021	0.120199	0.372349	0.526644	0.577608	0.511311	0.399313	0.283239	0.203912	0.130854	0.0228735	-0.115419	-0.225958	-0.275367	-0.300079	-0.322875	-0.331327	-0.327455	-0.272369	-0.19431	-0.0261084	0.191089	0.400172	0.48745	0.414971
-0.507045	-0.659298	-0.8018	-0.895231	-0.869481	-0.792001	-0.675775	-0.516882	-0.316006	-0.134607	-0.0251777	-0.0224799	-0.0627802	-0.0442993	0.0246632	0.114721	0.169953	0.182892	0.206318	0.240771	0.313121	0.463237	0.556555	0.553485	0.397427	0.123271	-0.171164	-0.377872	-0.524895	-0.55986	-0.502819	-0.424108	-0.336588	-0.254219	-0.102548	0.165322	0.482891	0.733535	0.804592	0.680943	0.479164	0.227072	0.0210389	-0.0622802	-0.109793	-0.148331	-0.203108	-0.263663	-0.271602	-0.230289
-0.229947	-0.182317	-0.169983	-0.148781	-0.0629668	0.148121	0.400694	0.579924	0.617389	0.458248	0.173146	-0.11114	-0.294565	-0.361171	-0.324084	-0.238603	-0.127922	0.0389929	0.264276	0.511099	0.672948	0.717002	0.636282	0.421085	0.0469619	-0.318067	-0.638307	-0.837263	-0.943256	-0.906868	-0.764972	-0.580915	-0.490227	-0.561594	-0.715437	-0.828305	-0.786918	-0.578926	-0.280383	-0.0121795	0.190669	0.306316	0.340356	0.321071	0.29361	0.292385	0.366776	0.46339	0.514439	0.476577
0.721394	0.683027	0.656418	0.645898	0.60541	0.581527	0.492424	0.320824	0.0557191	-0.203195	-0.38365	-0.481626	-0.527575	-0.540708	-0.512025	-0.457551	-0.420899	-0.394908	-0.430323	-0.432537	-0.350413	-0.186776	-0.0544711	0.0103308	-0.0683997	-0.197346	-0.281811	-0.299073	-0.256785	-0.191794	-0.135596	-0.0834949	-0.0856162	-0.135875	-0.256098	-0.395185	-0.519538	-0.590651	-0.615758	-0.575131	-0.468335	-0.238365	0.0513517	0.338312	0.475699	0.458269	0.336815	0.250396	0.19182	0.163712
0.737597	0.600962	0.388272	0.106073	-0.154141	-0.338966	-0.438059	-0.484531	-0.497815	-0.468805	-0.413709	-0.37664	-0.350353	-0.386171	-0.38841	-0.305351	-0.139849	-0.00603649	0.0595039	-0.0201237	-0.15054	-0.235967	-0.253426	-0.210656	-0.144924	-0.088086	-0.0353909	-0.0375365	-0.0883682	-0.209961	-0.350633	-0.476403	-0.548326	-0.573719	-0.53263	-0.424616	-0.192026	0.100992	0.391222	0.530175	0.512546	0.389708	0.302304	0.243062	0.214633	0.200555	0.215465	0.248387	0.311338	0.355844
-0.132611	-0.140529	-0.172462	-0.240789	-0.318729	-0.370054	-0.359078	-0.303528	-0.167829	-0.060553	0.00806581	0.00528305	-0.122165	-0.317605	-0.463157	-0.450251	-0.310476	-0.108257	0.0679673	0.213529	0.244513	0.267411	0.294527	0.299853	0.219134	0.0055052	-0.202339	-0.400148	-0.514588	-0.443128	-0.26797	-0.0967494	0.019673	0.0153687	-0.0429894	-0.137601	-0.249549	-0.270482	-0.177995	-0.0332119	0.110829	0.195921	0.219923	0.127203	-0.0615502	-0.299072	-0.468384	-0.470443	-0.25934	0.0764914
-1.1767	-1.13731	-1.13042	-1.12078	-1.07902	-0.942691	-0.78894	-0.657537	-0.55705	-0.425808	-0.258346	-0.0416127	0.177791	0.361454	0.481544	0.50189	0.522923	0.526012	0.470453	0.298337	0.0397045	-0.20206	-0.347259	-0.324747	-0.173966	0.0196011	0.19426	0.334003	0.412081	0.49009	0.540864	0.578697	0.58869	0.510745	0.404637	0.226144	0.0506758	-0.0914504	-0.161217	-0.163166	-0.0531618	0.111652	0.294957	0.451545	0.564274	0.709234	0.84813	0.994209	1.10797	1.10023
0.702712	0.678143	0.634741	0.522045	0.396868	0.199771	0.0102623	-0.143236	-0.218585	-0.220691	-0.101884	0.076118	0.27409	0.443207	0.564957	0.721516	0.871527	1.02929	1.15216	1.1438	0.97678	0.673187	0.233248	-0.217281	-0.551544	-0.762841	-0.846746	-0.850587	-0.857309	-0.902865	-0.967605	-0.996334	-0.905296	-0.712509	-0.559339	-0.425879	-0.370013	-0.27632	-0.176524	-0.0599695	-0.0103755	-0.0488329	-0.0996782	-0.14681	-0.131907	-0.114685	-0.0896243	-0.0879375	-0.0577517	0.0317605
0.236539	0.231537	0.195348	0.174319	0.184857	0.190674	0.263733	0.363317	0.467709	0.565929	0.643307	0.722558	0.760747	0.755777	0.773104	0.772914	0.664176	0.48861	0.307865	0.19173	0.164967	0.221198	0.309622	0.362062	0.310468	0.304954	0.327334	0.315673	0.301128	0.256203	0.195971	0.105376	0.0162207	-0.0415255	-0.0902152	-0.163061	-0.247951	-0.327457	-0.387902	-0.470396	-0.617239	-0.826217	-1.05756	-1.2003	-1.22293	-1.1384	-1.0868	-1.04306	-0.98505	-0.85398
0.186037	0.363208	0.485806	0.538213	0.485919	0.478723	0.501357	0.489563	0.474854	0.42942	0.368506	0.276885	0.186719	0.128319	0.0790774	0.00540617	-0.0804458	-0.160852	-0.221982	-0.305411	-0.453917	-0.665263	-0.899228	-1.04359	-1.06647	-0.980981	-0.928798	-0.884564	-0.825895	-0.69334	-0.484954	-0.215327	0.018155	0.164834	0.196864	0.146964	0.115982	0.145092	0.255454	0.395865	0.452294	0.337399	0.0813436	-0.168104	-0.28591	-0.242445	-0.0358731	0.206962	0.426183	0.617688
-0.222001	-0.10703	-0.0920265	-0.251754	-0.529907	-0.830887	-1.02957	-1.06059	-0.931505	-0.726773	-0.477172	-0.205272	0.00111318	0.0895165	0.0398904	-0.0860989	-0.198157	-0.287367	-0.375768	-0.507274	-0.69619	-0.924652	-1.08903	-1.1179	-0.960436	-0.622961	-0.206535	0.166088	0.421459	0.543879	0.544357	0.505439	0.400531	0.317167	0.224751	0.144133	0.0855391	0.0863384	0.169043	0.296735	0.446265	0.475233	0.405963	0.315743	0.251012	0.334309	0.493831	0.672472	0.815265	0.88509
0.448441	0.629746	0.699405	0.656779	0.465982	0.245861	0.0783797	0.0152095	0.061612	0.112582	0.0794493	0.0208476	-0.0624116	-0.0652827	0.0328922	0.161379	0.294062	0.367431	0.431872	0.494102	0.535205	0.561073	0.62692	0.650601	0.587103	0.456992	0.230699	-0.0337603	-0.252323	-0.385231	-0.452042	-0.508589	-0.587335	-0.657387	-0.647156	-0.612238	-0.538095	-0.488254	-0.407337	-0.256532	-0.0469597	0.143298	0.207837	0.0900116	-0.136624	-0.38092	-0.548036	-0.656926	-0.690397	-0.665413
-0.937496	-0.757976	-0.613685	-0.521685	-0.430504	-0.289167	-0.0552686	0.167591	0.352216	0.432907	0.445464	0.347845	0.198847	0.0242012	-0.129142	-0.258016	-0.31554	-0.318865	-0.163957	0.102739	0.359579	0.552615	0.578662	0.522278	0.42521	0.345198	0.344352	0.332246	0.210119	-0.00635387	-0.237301	-0.416898	-0.416798	-0.264769	-0.0844536	0.0693213	0.140744	0.0996969	-0.000434568	-0.13884	-0.247653	-0.257641	-0.234811	-0.162368	-0.104082	-0.0489584	0.00660002	0.135486	0.303618	0.465546
0.804681	0.58986	0.419144	0.308315	0.30357	0.280712	0.148568	-0.0856593	-0.335548	-0.529875	-0.529767	-0.365269	-0.170164	-0.00377752	0.0735033	0.0290894	-0.0792545	-0.229011	-0.346749	-0.357556	-0.332853	-0.254469	-0.191402	-0.131758	-0.071643	0.0678135	0.249735	0.424944	0.481805	0.443284	0.35178	0.287357	0.250758	0.229266	0.0883307	-0.155779	-0.383097	-0.530638	-0.508217	-0.376244	-0.16123	0.032663	0.164113	0.191621	0.137295	0.101892	0.0835785	0.148304	0.258107	0.347497
-0.694262	-0.60599	-0.520778	-0.444019	-0.371534	-0.301022	-0.188769	-0.062369	0.0560382	0.187876	0.351382	0.433873	0.391944	0.248772	0.083018	-0.0300767	-0.0568144	0.0327365	0.150593	0.263527	0.38176	0.492472	0.632087	0.833272	0.994181	0.988563	0.766797	0.397187	0.0733902	-0.116799	-0.0792237	0.199614	0.483402	0.68327	0.665068	0.47904	0.243905	0.0943537	-0.0236738	-0.0929414	-0.135717	-0.180038	-0.165991	-0.0860463	0.0434316	0.127057	0.147698	0.0912825	-0.0272372	-0.201675
-0.130314	-0.0224247	0.063324	0.12301	0.125673	0.0545863	0.0217388	0.0417846	0.128722	0.253806	0.27488	0.163343	-0.0384539	-0.197564	-0.26353	-0.254547	-0.160647	-0.00738513	0.177993	0.310799	0.375353	0.327901	0.216135	0.0783063	-0.0225758	-0.0991468	-0.11918	-0.177218	-0.272023	-0.393183	-0.510747	-0.574374	-0.595017	-0.6153	-0.580321	-0.515669	-0.465082	-0.353623	-0.242069	-0.101732	0.0337895	0.100013	0.122317	0.137851	0.224031	0.327913	0.352107	0.295702	0.195266	0.158654
0.871964	0.831979	0.849652	0.899309	0.956263	1.04835	1.09906	1.10826	1.07701	0.9904	0.840208	0.647627	0.455197	0.24622	0.0263297	-0.196128	-0.352473	-0.333172	-0.132408	0.140558	0.283843	0.222805	-0.0275999	-0.286234	-0.499029	-0.556363	-0.545752	-0.496368	-0.452357	-0.420556	-0.412405	-0.438626	-0.496614	-0.591318	-0.70113	-0.797398	-0.839671	-0.786819	-0.719096	-0.618718	-0.530239	-0.395791	-0.241032	-0.0981172	-0.0360968	-0.0845585	-0.164182	-0.186948	-0.0873217	0.0717275
-0.829471	-0.843581	-0.816436	-0.711505	-0.506904	-0.235925	0.0518209	0.239623	0.327921	0.354086	0.359617	0.362628	0.420468	0.459189	0.453461	0.392737	0.2823	0.114075	-0.071218	-0.289805	-0.457693	-0.618548	-0.696225	-0.630459	-0.41115	-0.206017	-0.0746243	-0.0766385	-0.158937	-0.198917	-0.135644	0.0457132	0.325524	0.628475	0.865326	0.929143	0.732574	0.331103	-0.0668039	-0.296487	-0.283612	-0.115862	0.102007	0.320177	0.528337	0.696794	0.791873	0.730835	0.530707	0.247582
-0.137267	0.110961	0.358781	0.638002	0.909582	1.11971	1.17678	1.00099	0.641953	0.286104	0.0806985	0.092212	0.242232	0.437072	0.632181	0.818339	0.96899	1.05402	0.999433	0.820459	0.567259	0.267102	-0.0148266	-0.197791	-0.237542	-0.160729	-0.0380992	0.0979939	0.239848	0.322193	0.328753	0.204717	-0.035697	-0.342531	-0.542586	-0.549569	-0.441552	-0.353156	-0.419483	-0.578886	-0.704348	-0.688596	-0.526948	-0.29479	-0.115221	-0.0838305	-0.202341	-0.411514	-0.572964	-0.624842
-1.32864	-1.07334	-0.758115	-0.479187	-0.317199	-0.373781	-0.556369	-0.70008	-0.682037	-0.496877	-0.230951	-0.0252648	0.0106917	-0.125056	-0.364654	-0.549586	-0.609009	-0.562469	-0.465507	-0.439853	-0.478615	-0.576917	-0.667224	-0.684859	-0.614083	-0.44178	-0.2181	0.0720025	0.343556	0.564332	0.683067	0.627995	0.435912	0.241954	0.157964	0.230573	0.413135	0.619586	0.788207	0.901099	0.932377	0.95346	0.932909	0.824616	0.604522	0.338603	0.124501	-0.0165375	-0.0792824	-0.133245
-0.31543	-0.379991	-0.425101	-0.440774	-0.399838	-0.341011	-0.228896	-0.0929104	0.0750869	0.174079	0.185411	0.075545	-0.0943634	-0.278194	-0.430092	-0.526857	-0.641749	-0.757887	-0.886348	-0.974544	-1.00115	-0.849581	-0.597621	-0.346192	-0.128027	0.0662603	0.294993	0.457987	0.495715	0.3767	0.176188	0.0458008	0.0293648	0.127906	0.217457	0.189952	0.0336375	-0.124206	-0.19315	-0.103482	0.0503561	0.0967762	0.00861681	-0.217842	-0.400689	-0.422175	-0.304716	-0.109977	0.0673543	0.187974
-1.01991	-0.942397	-0.846611	-0.764734	-0.716693	-0.721009	-0.681892	-0.611711	-0.474347	-0.401041	-0.440886	-0.561456	-0.63371	-0.570111	-0.366219	-0.0602629	0.239826	0.473504	0.565963	0.561143	0.532825	0.509107	0.513597	0.586346	0.687508	0.756771	0.822903	0.83578	0.835703	0.793084	0.676965	0.518082	0.356395	0.247869	0.140532	-0.0446255	-0.27145	-0.392181	-0.327071	-0.106129	0.208273	0.478191	0.602239	0.535006	0.382581	0.197059	0.0335129	-0.0923704	-0.119292	-0.102898
0.671945	0.503837	0.35487	0.197097	0.0561399	-0.0579645	-0.085313	-0.0686588	-0.0755933	-0.0827847	-0.110972	-0.177126	-0.274939	-0.323789	-0.296143	-0.198966	-0.104765	-0.0807424	-0.110778	-0.0954361	0.0135403	0.197943	0.387082	0.501354	0.533856	0.524487	0.485528	0.426082	0.369078	0.261323	0.17424	0.0585282	-0.101294	-0.237509	-0.303379	-0.235207	-0.0417259	0.185967	0.459169	0.729034	0.876275	0.864915	0.662402	0.332053	0.0274586	-0.141107	-0.219523	-0.270245	-0.300132	-0.288811
0.497779	0.432464	0.392786	0.354013	0.302598	0.253921	0.157655	0.079857	-0.0235169	-0.166298	-0.287989	-0.346836	-0.285932	-0.113082	0.0903338	0.334405	0.575497	0.707038	0.69689	0.515969	0.220844	-0.0512738	-0.201866	-0.271921	-0.317235	-0.343935	-0.333821	-0.326301	-0.361406	-0.441324	-0.529075	-0.652779	-0.741658	-0.737355	-0.74362	-0.782842	-0.78848	-0.776463	-0.700901	-0.559267	-0.386886	-0.25346	-0.199391	-0.188966	-0.122724	-0.0333916	0.08176	0.159387	0.179334	0.145095
-0.422031	-0.388429	-0.243756	-0.0555469	0.108681	0.177302	0.230668	0.330045	0.43042	0.507096	0.576283	0.604538	0.574315	0.471225	0.283339	0.0751663	-0.0931035	-0.163527	-0.146142	-0.078289	0.0276793	0.161921	0.279597	0.354573	0.37136	0.322356	0.229175	0.0798723	-0.108264	-0.31635	-0.471074	-0.44311	-0.196709	0.12975	0.416975	0.4897	0.410705	0.255835	0.0717091	-0.0725122	-0.152682	-0.21812	-0.258497	-0.253505	-0.268913	-0.2384	-0.197226	-0.179082	-0.167017	-0.223634
0.190141	-0.0030581	-0.113822	-0.0516716	0.202718	0.526456	0.809317	0.880936	0.803142	0.650626	0.469297	0.327268	0.248317	0.183873	0.144109	0.149026	0.133852	0.163901	0.204449	0.222317	0.234199	0.178442	0.0496315	-0.11209	-0.260623	-0.284983	-0.221888	-0.0915155	0.125403	0.352528	0.479942	0.551776	0.515004	0.460133	0.385708	0.359158	0.363902	0.331023	0.245908	0.124267	-0.0150446	-0.142942	-0.242398	-0.34397	-0.461275	-0.588119	-0.682766	-0.669534	-0.579964	-0.485566
-1.18977	-1.24059	-1.26	-1.31352	-1.32097	-1.25548	-1.11508	-0.921525	-0.648829	-0.367342	-0.145425	-0.0519985	-0.0536691	-0.127613	-0.229436	-0.320994	-0.366625	-0.385221	-0.37362	-0.261618	-0.0347934	0.283321	0.605599	0.791625	0.83701	0.76041	0.625807	0.483764	0.367269	0.291338	0.31329	0.390941	0.525897	0.651464	0.734229	0.759499	0.792294	0.765845	0.744076	0.661597	0.497821	0.296081	0.142418	0.134563	0.204316	0.302647	0.336057	0.272774	0.119685	0.0370053
-0.427686	-0.513802	-0.531373	-0.469262	-0.345723	-0.230174	-0.127743	-0.0542535	0.0520516	0.254649	0.583506	0.921896	1.06962	0.949921	0.609522	0.145351	-0.317975	-0.716149	-0.96813	-1.06115	-0.975117	-0.71596	-0.433355	-0.242975	-0.197134	-0.241982	-0.343472	-0.437669	-0.538887	-0.602695	-0.643032	-0.569004	-0.389739	-0.126519	0.110286	0.23529	0.17963	0.0379251	-0.0331906	-0.0196245	0.123218	0.261806	0.360399	0.395217	0.372943	0.360486	0.333801	0.281921	0.230622	0.186925
-0.126083	-0.102539	-0.0836059	-0.00191189	0.184379	0.497951	0.824465	0.967004	0.851508	0.523054	0.075172	-0.371895	-0.756095	-0.999234	-1.08899	-1.00598	-0.755913	-0.483226	-0.299526	-0.255294	-0.298569	-0.396496	-0.487388	-0.585054	-0.646623	-0.685545	-0.614114	-0.44114	-0.187158	0.0413378	0.161955	0.108248	-0.0284839	-0.0971039	-0.0840139	0.0538156	0.18754	0.282673	0.316269	0.294777	0.282757	0.257008	0.206949	0.15745	0.115288	0.0935423	0.118248	0.188409	0.292492	0.365128
0.16894	0.0717691	-0.11017	-0.291319	-0.370417	-0.355459	-0.21679	-0.0822517	0.0134606	0.0472614	0.0256378	0.0135448	-0.0123604	-0.0627245	-0.112524	-0.154944	-0.176822	-0.151965	-0.081377	0.0233389	0.0964172	0.148883	0.13974	0.0769612	0.025659	0.0304354	0.0378701	0.0313866	-0.0123304	0.0497854	0.230511	0.50859	0.728614	0.767087	0.641701	0.488252	0.334333	0.203678	0.0826844	-0.0652177	-0.18162	-0.234759	-0.289563	-0.283721	-0.229361	-0.182098	-0.100155	-0.0425556	-0.0619984	-0.123135
-0.0572143	-0.0878728	-0.114006	-0.115814	-0.0849379	-0.0113965	0.0918934	0.163977	0.215728	0.206709	0.144785	0.0941819	0.0988933	0.106227	0.0998316	0.0567099	0.11798	0.296244	0.570536	0.787565	0.825513	0.701835	0.550475	0.398653	0.269777	0.150431	0.00454273	-0.110275	-0.162689	-0.216747	-0.210985	-0.157365	-0.110746	-0.0299186	0.0268963	0.00771823	-0.0525854	-0.2268	-0.376272	-0.457794	-0.435146	-0.288696	-0.0684455	0.164994	0.263947	0.229186	0.0298805	-0.186871	-0.400979	-0.512383
0.821625	1.01884	1.10919	1.0604	0.904884	0.748974	0.606302	0.485195	0.373042	0.235948	0.128051	0.0787954	0.0279961	0.0334106	0.0837986	0.127608	0.203563	0.256954	0.238932	0.182263	0.0185495	-0.121914	-0.198522	-0.177239	-0.0396162	0.167359	0.386727	0.479716	0.44705	0.259758	0.0560715	-0.145131	-0.249821	-0.287033	-0.273549	-0.208776	-0.071288	0.0871017	0.182239	0.216069	0.141067	0.0594859	-0.00162354	-0.0278635	-0.0557959	-0.0714291	-0.123922	-0.208222	-0.306252	-0.39364
0.957156	0.759112	0.580261	0.343394	0.174125	0.0789013	0.101563	0.2481	0.468481	0.702058	0.80107	0.766288	0.566865	0.349985	0.13575	0.0242799	-0.0153432	-0.000985057	0.0679833	0.214376	0.383025	0.484325	0.520346	0.440486	0.353621	0.288553	0.260614	0.230872	0.214226	0.158333	0.0685727	-0.0358069	-0.128855	-0.212716	-0.329998	-0.459571	-0.585471	-0.656607	-0.710485	-0.65986	-0.544735	-0.437356	-0.366185	-0.330143	-0.318002	-0.32949	-0.38795	-0.465247	-0.580595	-0.594748
0.673357	0.517877	0.30887	0.168796	0.0906003	0.123119	0.271283	0.494111	0.730282	0.830394	0.795226	0.593588	0.3743	0.157686	0.0449774	0.00491428	0.0194319	0.0891662	0.237185	0.407707	0.510131	0.546553	0.465806	0.377976	0.312185	0.283936	0.253864	0.237033	0.180519	0.0897621	-0.0157767	-0.109858	-0.19465	-0.313235	-0.444247	-0.571545	-0.643471	-0.697948	-0.64676	-0.530357	-0.421785	-0.349824	-0.313382	-0.301106	-0.312722	-0.371831	-0.449986	-0.566615	-0.580925	-0.472841
0.170336	0.241794	0.400226	0.565619	0.670251	0.702743	0.613265	0.515937	0.443032	0.411728	0.378404	0.359753	0.297128	0.196557	0.0796053	-0.0246498	-0.118611	-0.250019	-0.395199	-0.536262	-0.615966	-0.676334	-0.619611	-0.49062	-0.370307	-0.290564	-0.250182	-0.236578	-0.24945	-0.314952	-0.401558	-0.530799	-0.546656	-0.426884	-0.171572	0.0243932	0.0614509	-0.0166295	-0.147585	-0.209384	-0.199195	-0.142755	-0.0703261	0.0663176	0.259768	0.4466	0.588441	0.582128	0.460021	0.325718
1.01107	0.909461	0.815481	0.667151	0.546516	0.47329	0.44233	0.409372	0.390927	0.32899	0.229525	0.113859	0.0107501	-0.082178	-0.212141	-0.355724	-0.495237	-0.574065	-0.633768	-0.57767	-0.450097	-0.331107	-0.252241	-0.212302	-0.198848	-0.211579	-0.27636	-0.362014	-0.489834	-0.505517	-0.387062	-0.134556	0.0592538	0.0959041	0.0186822	-0.110834	-0.171953	-0.161876	-0.106056	-0.034424	0.100717	0.292041	0.476818	0.6171	0.610857	0.490092	0.357266	0.215775	0.0884471	-0.0360268
-0.382304	-0.428719	-0.443864	-0.467234	-0.398182	-0.268829	-0.14962	-0.0706084	-0.0305965	-0.0171178	-0.0298716	-0.0947721	-0.180584	-0.30864	-0.324351	-0.205678	0.0472926	0.24146	0.278177	0.200813	0.0710588	0.00982726	0.0199227	0.0758451	0.147609	0.283	0.474675	0.659793	0.800333	0.794079	0.673091	0.54002	0.398269	0.270707	0.146004	0.0907357	0.0870852	0.166166	0.23846	0.251578	0.12719	-0.0558118	-0.194848	-0.195121	-0.078055	0.145298	0.309464	0.286849	0.129036	-0.0455884
-0.332566	-0.234891	-0.164357	-0.135591	-0.174158	-0.240873	-0.359166	-0.373679	-0.264054	-0.0303698	0.148994	0.182912	0.111446	-0.00841547	-0.0649787	-0.055653	-0.0039941	0.0622988	0.187367	0.364429	0.535433	0.665258	0.659481	0.547718	0.424792	0.293848	0.176011	0.0608155	0.00976128	0.00638906	0.0794403	0.146223	0.15834	0.043436	-0.125613	-0.25405	-0.254301	-0.146161	0.060164	0.211814	0.190923	0.0451413	-0.116169	-0.211607	-0.253152	-0.27985	-0.301538	-0.354322	-0.44157	-0.503266
0.00357869	-0.0458552	-0.100172	-0.185792	-0.272257	-0.398657	-0.413148	-0.303688	-0.0703552	0.108739	0.142606	0.0712479	-0.0484339	-0.104912	-0.0956004	-0.0440192	0.0221741	0.147054	0.32385	0.494597	0.624227	0.618458	0.506863	0.384123	0.253376	0.135715	0.020693	-0.0302845	-0.0336516	0.0392898	0.105972	0.118071	0.00333965	-0.165456	-0.293699	-0.29395	-0.185972	0.0200425	0.171464	0.150605	0.00504231	-0.156026	-0.251319	-0.292803	-0.319461	-0.341115	-0.39382	-0.480937	-0.542541	-0.5972
-0.0280249	0.013879	0.00280388	-0.0448378	-0.12667	-0.166052	-0.169403	-0.0968209	-0.0304674	-0.0184277	-0.132594	-0.300557	-0.428168	-0.428418	-0.320972	-0.115973	0.0347017	0.0139452	-0.1309	-0.291174	-0.385998	-0.427276	-0.453803	-0.475351	-0.527796	-0.614483	-0.675783	-0.730173	-0.725705	-0.656484	-0.477238	-0.202219	0.140872	0.395131	0.480137	0.403149	0.337469	0.342061	0.427204	0.487049	0.48853	0.427564	0.308003	0.212493	0.10127	0.0053483	-0.0257112	0.042582	0.17078	0.275757
-0.4546	-0.261689	-0.0451453	0.0781384	0.0451099	-0.0995357	-0.2532	-0.344114	-0.38369	-0.409123	-0.429782	-0.480065	-0.563177	-0.621949	-0.674096	-0.669812	-0.603446	-0.431592	-0.167914	0.161029	0.404803	0.486302	0.41249	0.349518	0.353921	0.435552	0.49293	0.494349	0.435897	0.321268	0.229696	0.12306	0.0310935	0.00131488	0.0667918	0.189703	0.290351	0.291626	0.20989	0.102659	0.0756006	0.201967	0.452518	0.632068	0.684623	0.599486	0.404459	0.210702	0.00723524	-0.0901847
0.624731	0.5358	0.436576	0.368969	0.286433	0.209598	0.183938	0.24036	0.346275	0.433006	0.434105	0.363671	0.271268	0.247951	0.356844	0.572748	0.727471	0.772758	0.699394	0.531335	0.364371	0.189039	0.10509	0.0969941	0.125736	0.12301	0.133891	0.140489	0.12622	0.111513	0.100003	0.0771859	0.0428109	0.0588741	0.133359	0.174642	0.163453	0.0754035	-0.0489062	-0.134932	-0.175027	-0.150799	-0.162261	-0.270957	-0.489121	-0.780073	-1.02229	-1.07907	-0.870387	-0.524863
-0.0673877	-0.108324	-0.189264	-0.328541	-0.53571	-0.795031	-1.00375	-1.05267	-0.872852	-0.575119	-0.333311	-0.269575	-0.418838	-0.688726	-0.945154	-1.08761	-1.0579	-0.871353	-0.571369	-0.247754	0.0194901	0.178232	0.359098	0.523719	0.655912	0.718475	0.704915	0.625578	0.601547	0.633277	0.771781	0.921545	0.974967	0.980758	0.948915	0.908564	0.8315	0.729682	0.582703	0.462668	0.367631	0.295885	0.200334	0.0896968	0.0158155	-0.00126828	-0.0103131	-0.0433224	-0.0733892	-0.0832529
-0.287008	-0.27383	-0.208424	-0.122516	-0.090225	-0.128384	-0.193158	-0.19675	-0.0721477	0.138374	0.412758	0.627069	0.638733	0.487014	0.20821	-0.105948	-0.381166	-0.579569	-0.659301	-0.632945	-0.50814	-0.3408	-0.153765	0.000358653	0.159406	0.299816	0.408683	0.51205	0.570399	0.586073	0.543247	0.509227	0.488457	0.501482	0.412922	0.290126	0.108867	-0.045882	-0.0713333	-0.00794054	0.0803676	0.131541	0.144983	0.128482	0.0712832	-0.00821911	-0.200762	-0.462259	-0.735047	-0.883535
-0.570389	-0.587499	-0.491823	-0.328318	-0.122867	0.027546	0.0583135	0.00785303	-0.0860581	-0.160085	-0.201755	-0.212837	-0.16751	-0.0315038	0.0848143	0.133414	0.149266	0.101312	0.0555963	-0.0130847	-0.0896773	-0.157824	-0.27575	-0.393665	-0.470413	-0.425665	-0.314631	-0.137437	0.0377425	0.170014	0.29906	0.422624	0.574566	0.572835	0.447879	0.293756	0.180021	0.111155	-0.027547	-0.225536	-0.448479	-0.620539	-0.624003	-0.461297	-0.218068	-0.0297086	0.0798348	0.181384	0.321024	0.473773
-0.0965874	-0.272296	-0.449431	-0.580862	-0.611328	-0.577246	-0.492953	-0.370105	-0.263452	-0.223716	-0.228929	-0.2779	-0.325829	-0.388317	-0.481798	-0.553799	-0.588994	-0.606299	-0.54686	-0.439955	-0.285087	-0.027044	0.215793	0.386813	0.490231	0.523718	0.50626	0.496467	0.506281	0.509014	0.443229	0.378056	0.348901	0.43611	0.596404	0.769238	0.832931	0.735879	0.542548	0.340272	0.187337	0.0706611	0.0329007	0.0693376	0.0774258	0.00151717	-0.168793	-0.436116	-0.687126	-0.84533
0.25338	0.321283	0.41773	0.556841	0.66322	0.655098	0.564152	0.354945	0.113405	-0.0852489	-0.195025	-0.200643	-0.186196	-0.23599	-0.273961	-0.312216	-0.326832	-0.318617	-0.224404	-0.123896	0.00620838	0.0929114	0.156288	0.191416	0.178831	0.0446299	-0.21958	-0.601883	-0.958943	-1.13861	-1.10383	-0.886031	-0.622707	-0.43761	-0.395072	-0.418039	-0.450437	-0.425255	-0.302076	-0.142224	-0.0327622	0.0863516	0.220057	0.383375	0.5332	0.584588	0.522095	0.39561	0.315543	0.324612
0.090591	0.254854	0.424652	0.573628	0.641853	0.602739	0.532535	0.402784	0.276847	0.206144	0.14916	0.115452	0.0739515	0.0220318	-0.0731828	-0.157697	-0.223854	-0.187823	-0.140223	-0.165138	-0.271288	-0.448949	-0.604506	-0.626686	-0.545258	-0.439094	-0.341856	-0.344715	-0.446831	-0.574981	-0.65525	-0.631364	-0.52795	-0.358099	-0.207098	0.0217115	0.298738	0.555265	0.699821	0.70403	0.646425	0.546285	0.453568	0.363111	0.228853	0.0757378	0.00280518	0.035149	0.0824536	0.086273
1.14	1.1605	1.12728	1.0481	0.966198	0.87455	0.801298	0.729832	0.623761	0.502791	0.445171	0.470724	0.508097	0.511115	0.493349	0.473403	0.478427	0.497663	0.494022	0.407858	0.323656	0.266676	0.179493	0.0826528	-0.063575	-0.218749	-0.338769	-0.376849	-0.315927	-0.203503	-0.0683065	0.0753244	0.189378	0.207783	0.12332	-0.0253529	-0.164113	-0.212788	-0.203653	-0.13329	-0.0543286	0.00135139	0.061488	0.0952666	0.151789	0.150534	0.108907	-0.00267524	-0.202559	-0.475809
0.813402	0.527229	0.255806	0.00734035	-0.153465	-0.26713	-0.399171	-0.574327	-0.725814	-0.866429	-0.927195	-0.910562	-0.807791	-0.651826	-0.510075	-0.441126	-0.424651	-0.376013	-0.232961	-0.0282474	0.183885	0.348852	0.511641	0.585971	0.606466	0.594028	0.588374	0.588672	0.595125	0.591299	0.553498	0.458365	0.31293	0.184427	0.129668	0.172251	0.284901	0.346891	0.276681	0.0495425	-0.17089	-0.317349	-0.397403	-0.371527	-0.346201	-0.271038	-0.181508	-0.0660686	0.0563871	0.205762
0.816226	0.671005	0.457928	0.165564	-0.0710842	-0.219337	-0.296902	-0.27183	-0.247292	-0.174467	-0.0877209	0.0241277	0.142775	0.287504	0.443374	0.622916	0.705124	0.636807	0.431127	0.158788	-0.108217	-0.242259	-0.304544	-0.244385	-0.163949	-0.0974413	-0.0447452	-0.0089287	-0.017894	-0.0101862	-0.0140822	-0.0519191	-0.158998	-0.375549	-0.619644	-0.843063	-0.975592	-0.91853	-0.687352	-0.343308	-0.000137177	0.222164	0.287712	0.262898	0.169746	0.0643214	-0.0290153	-0.0945697	-0.160517	-0.233988
0.799898	0.682756	0.546212	0.360765	0.1326	-0.0662746	-0.22714	-0.280314	-0.257939	-0.21546	-0.176742	-0.0836031	0.0342889	0.167754	0.272145	0.281816	0.200862	0.0218215	-0.154679	-0.262231	-0.330634	-0.372942	-0.38265	-0.404369	-0.365858	-0.393525	-0.451702	-0.499118	-0.477444	-0.284007	-0.00205936	0.219697	0.256114	0.166376	0.0642275	0.0799747	0.189843	0.323361	0.400208	0.312336	0.10259	-0.174211	-0.414281	-0.542742	-0.434113	-0.140884	0.233067	0.56242	0.72226	0.689495
0.923838	0.808226	0.708923	0.622599	0.61209	0.719867	0.91173	1.03481	1.01976	0.817267	0.512994	0.181936	-0.114535	-0.338514	-0.524724	-0.575736	-0.540066	-0.377457	-0.178369	-0.0237818	0.094419	0.157408	0.217302	0.269951	0.306894	0.32352	0.297295	0.154739	-0.0201913	-0.249251	-0.455012	-0.522698	-0.463819	-0.302503	-0.0923358	0.0979282	0.262662	0.324683	0.282812	0.20714	0.0782841	0.00785365	0.00327709	0.0401762	0.0609946	-0.0295116	-0.215442	-0.433431	-0.639528	-0.725228
0.743457	0.656417	0.589193	0.595447	0.711393	0.905094	1.02772	1.01273	0.810978	0.507824	0.177983	-0.117398	-0.340553	-0.526079	-0.576903	-0.541364	-0.379353	-0.180997	-0.0269783	0.0907879	0.153546	0.213219	0.265675	0.302482	0.319046	0.292918	0.150886	-0.023401	-0.251619	-0.456623	-0.52406	-0.465397	-0.304675	-0.0952802	0.0942842	0.258412	0.320205	0.278489	0.203095	0.0747123	0.00454085	-1.8887e-05	0.0367446	0.0574864	-0.032687	-0.217934	-0.435121	-0.640461	-0.725845	-0.751479
0.516098	0.506546	0.560445	0.704581	0.909052	1.03421	1.01917	0.816751	0.512596	0.181664	-0.114692	-0.338585	-0.524723	-0.575716	-0.540059	-0.377513	-0.178501	-0.0239737	0.0941816	0.157147	0.217017	0.269646	0.306575	0.323194	0.29698	0.154478	-0.0203846	-0.249357	-0.455038	-0.522698	-0.463842	-0.302588	-0.0925013	0.0976895	0.26236	0.324357	0.282503	0.20686	0.078053	0.00764961	0.00307481	0.0399598	0.0607701	-0.0297012	-0.21556	-0.433465	-0.639483	-0.72515	-0.750868	-0.716368
1.6493	1.46648	1.23676	0.925921	0.58178	0.239914	-0.0557009	-0.279033	-0.464705	-0.51557	-0.480003	-0.317864	-0.11935	0.0347904	0.15265	0.215458	0.275178	0.327675	0.364512	0.381089	0.35494	0.212796	0.0383705	-0.190028	-0.395195	-0.462686	-0.403976	-0.243126	-0.0335656	0.156149	0.320407	0.382249	0.340499	0.265046	0.136562	0.0663345	0.0617712	0.0985638	0.119322	0.0290772	-0.156317	-0.373676	-0.579178	-0.66463	-0.690284	-0.65587	-0.600094	-0.500101	-0.409366	-0.308533
-0.30744	-0.356052	-0.437861	-0.516606	-0.547715	-0.47908	-0.292951	-0.0240434	0.220587	0.427749	0.543729	0.639977	0.78743	0.944117	1.04272	0.984743	0.824112	0.578692	0.36948	0.191115	0.0750291	0.0247199	0.0677595	0.18492	0.320452	0.356497	0.301885	0.184022	0.056397	-0.101681	-0.179227	-0.211458	-0.2444	-0.255868	-0.250264	-0.147011	-0.0200145	0.105877	0.222354	0.177397	-0.000401588	-0.220282	-0.374954	-0.392054	-0.367648	-0.321743	-0.332419	-0.370498	-0.412745	-0.366167
0.186831	0.178218	0.237227	0.342282	0.459789	0.487945	0.440164	0.33704	0.225376	0.0870677	0.0192198	-0.00897987	-0.037802	-0.047836	-0.0429327	0.0474068	0.158521	0.268668	0.370579	0.331244	0.175681	-0.0167003	-0.152029	-0.16699	-0.145637	-0.105472	-0.114814	-0.148131	-0.185093	-0.144341	-0.064626	0.0152727	0.0558339	0.0155657	-0.0644693	-0.130001	-0.120028	-0.0872911	0.0131756	0.0851316	0.126804	0.191746	0.226726	0.220433	0.227487	0.299111	0.411994	0.559525	0.629216	0.624574
-0.16126	-0.177827	-0.0845024	0.0747895	0.225277	0.333851	0.353541	0.270338	0.154965	0.0705826	-0.0153851	-0.0920504	-0.130221	-0.0808309	0.0968694	0.315379	0.482202	0.497365	0.373913	0.0676888	-0.298959	-0.591796	-0.743755	-0.736916	-0.646955	-0.581959	-0.621398	-0.745678	-0.911856	-1.01528	-0.977217	-0.847739	-0.633974	-0.446175	-0.292926	-0.244876	-0.181032	-0.0365879	0.16784	0.33377	0.384574	0.312461	0.169417	0.0395255	-0.0399641	-0.0517685	-0.013182	0.0837519	0.244809	0.402022
-0.829633	-0.790063	-0.723074	-0.61371	-0.489837	-0.420404	-0.456297	-0.569403	-0.72064	-0.814769	-0.780124	-0.662288	-0.467742	-0.296828	-0.157358	-0.113628	-0.0555245	0.0759326	0.26198	0.412991	0.459227	0.393598	0.263416	0.145203	0.0728599	0.0621169	0.097234	0.185453	0.332029	0.475107	0.609617	0.70928	0.735102	0.745777	0.723426	0.707372	0.680016	0.679252	0.649768	0.64347	0.642838	0.645491	0.561754	0.378305	0.15457	0.00417743	-0.0604723	-0.072235	-0.169768	-0.314948
0.781701	0.818011	0.851612	0.853949	0.867339	0.845507	0.839403	0.838791	0.841362	0.760215	0.582441	0.365627	0.219887	0.157237	0.145839	0.0513227	-0.0893656	-0.258062	-0.330232	-0.199733	0.0125628	0.17452	0.22386	0.169762	0.0432592	-0.0765404	-0.204695	-0.257005	-0.253925	-0.233287	-0.209745	-0.21244	-0.251392	-0.248248	-0.187154	-0.0877202	-0.00812084	-0.0112253	-0.0431423	-0.10019	-0.170872	-0.236449	-0.271285	-0.256884	-0.179879	-0.131873	-0.0902058	-0.140311	-0.264727	-0.432256
0.872285	0.871859	0.893022	0.875713	0.872572	0.875344	0.87795	0.795697	0.6155	0.395731	0.248004	0.184501	0.172946	0.0771421	-0.0654638	-0.23646	-0.309613	-0.177335	0.037854	0.202019	0.252031	0.197196	0.0689688	-0.0524638	-0.182365	-0.235388	-0.232266	-0.211347	-0.187484	-0.190215	-0.229698	-0.226512	-0.164585	-0.0637959	0.0168884	0.0137417	-0.0186104	-0.0764361	-0.148082	-0.214552	-0.249863	-0.235266	-0.157211	-0.108551	-0.0663154	-0.117104	-0.243215	-0.413028	-0.587229	-0.700468
-0.156726	-0.232279	-0.304082	-0.375373	-0.388004	-0.338849	-0.248328	-0.175863	-0.178689	-0.207745	-0.25968	-0.324027	-0.383726	-0.41544	-0.402329	-0.332226	-0.288523	-0.25059	-0.296205	-0.409469	-0.561983	-0.718438	-0.820141	-0.812716	-0.682271	-0.546977	-0.418564	-0.338344	-0.347521	-0.420121	-0.453327	-0.394363	-0.262722	-0.161491	-0.149179	-0.21635	-0.355809	-0.448968	-0.463624	-0.358777	-0.186555	-0.0207975	0.135101	0.267463	0.377679	0.537232	0.686151	0.709539	0.678207	0.594746
0.19448	0.068781	0.0251537	0.0967144	0.268766	0.516569	0.754942	0.911514	0.934803	0.817803	0.619977	0.477938	0.395369	0.330017	0.268211	0.203688	0.185533	0.238326	0.349875	0.444888	0.419609	0.266318	0.107213	0.0922545	0.236147	0.444672	0.604814	0.657197	0.549216	0.385569	0.171996	-0.0478239	-0.224192	-0.354309	-0.405878	-0.396349	-0.358069	-0.366102	-0.423419	-0.52211	-0.557849	-0.518639	-0.475775	-0.34319	-0.261012	-0.231554	-0.284393	-0.350966	-0.404159	-0.399918
0.812615	0.949587	1.01962	0.991719	0.869558	0.68023	0.546677	0.469041	0.407593	0.349479	0.28881	0.27174	0.321379	0.426265	0.515601	0.491833	0.347699	0.198099	0.184034	0.31933	0.515398	0.665974	0.715227	0.613697	0.459826	0.259012	0.052324	-0.113508	-0.235851	-0.28434	-0.27538	-0.239387	-0.24694	-0.300833	-0.393628	-0.427232	-0.390365	-0.350062	-0.225396	-0.148128	-0.12043	-0.170112	-0.232708	-0.282723	-0.278736	-0.267807	-0.214693	-0.185672	-0.229634	-0.326216
-0.2091	-0.0984445	0.0382209	0.20793	0.387834	0.48694	0.45447	0.3039	0.144097	0.0715223	0.0462837	0.103532	0.259406	0.507207	0.817561	1.04463	1.07931	0.860468	0.549467	0.337543	0.31706	0.418591	0.558672	0.677372	0.714316	0.719602	0.700129	0.646778	0.482602	0.237754	0.0127785	-0.107594	-0.0960133	-0.0661888	-0.0984408	-0.216949	-0.399407	-0.558732	-0.614534	-0.59169	-0.54994	-0.524586	-0.559227	-0.621903	-0.661876	-0.67586	-0.643859	-0.567006	-0.491214	-0.475467
0.24885	0.097244	-0.00426158	-0.0363269	0.0200471	0.0690266	0.0369665	-0.0808364	-0.262208	-0.420584	-0.476055	-0.453347	-0.411845	-0.386642	-0.421077	-0.48338	-0.523115	-0.537015	-0.505205	-0.428809	-0.353469	-0.337815	-0.435339	-0.502225	-0.493683	-0.36177	-0.186741	-0.0603586	-0.0137919	-0.103252	-0.223833	-0.329336	-0.360792	-0.266544	-0.124483	-0.042596	-0.0473842	-0.162832	-0.306976	-0.33621	-0.192565	0.0799878	0.380311	0.600836	0.683522	0.579404	0.398303	0.189952	0.0809141	0.0410278
0.641371	0.78566	0.848055	0.872892	0.797382	0.621565	0.384342	0.0694855	-0.236298	-0.462807	-0.645739	-0.736756	-0.732357	-0.664605	-0.563169	-0.478423	-0.417859	-0.315311	-0.186678	-0.0327118	0.122744	0.201085	0.217983	0.220936	0.202735	0.107662	-0.00261283	-0.0687002	-0.0593523	0.0719448	0.198467	0.315609	0.293783	0.163368	0.0101305	-0.109762	-0.160916	-0.118031	0.0310805	0.155783	0.215657	0.126901	0.00958122	-0.0326159	0.011232	0.0808881	0.111531	0.0773364	-0.0971464	-0.341466
-0.681291	-0.730088	-0.712902	-0.638764	-0.540816	-0.456417	-0.394095	-0.28857	-0.156203	0.00223267	0.162201	0.242817	0.260205	0.263244	0.244514	0.146682	0.0332054	-0.0348005	-0.0251812	0.109927	0.240122	0.360665	0.338206	0.204005	0.0463187	-0.0770542	-0.129693	-0.085563	0.0678769	0.196199	0.257811	0.166479	0.0457535	0.00233143	0.0474521	0.11913	0.150662	0.115476	-0.0640725	-0.315484	-0.536728	-0.638915	-0.562349	-0.399919	-0.209988	-0.0250024	0.0848544	0.192519	0.313427	0.425301
-0.174689	-0.166345	-0.179716	-0.166922	-0.0980974	-0.0525514	-0.0690512	-0.182383	-0.26953	-0.357876	-0.415074	-0.442321	-0.402465	-0.348198	-0.324703	-0.31969	-0.2893	-0.1271	0.15087	0.503615	0.806004	0.921632	0.879599	0.692115	0.473348	0.227595	-0.0095916	-0.243751	-0.413341	-0.437875	-0.329879	-0.176371	-0.117142	-0.120153	-0.177298	-0.255761	-0.287922	-0.294272	-0.233216	-0.0967822	0.0995936	0.302906	0.435008	0.449522	0.348888	0.181253	0.027082	-0.110147	-0.212477	-0.239725
-0.645152	-0.778022	-0.856897	-0.861817	-0.77956	-0.604715	-0.354666	-0.105198	0.0550006	0.103901	0.0550619	0.02119	0.0249079	0.0916991	0.1882	0.281216	0.288573	0.256262	0.156336	0.0853841	0.0781532	0.179928	0.395149	0.620086	0.815418	0.89516	0.890478	0.83529	0.827007	0.867205	0.978756	1.0016	0.867379	0.577372	0.143281	-0.335218	-0.803564	-1.05862	-1.07688	-0.918043	-0.599941	-0.246303	0.0164809	0.166793	0.213831	0.183153	0.121971	0.0441808	-0.00699809	-0.00443822
0.793005	0.968623	1.12892	1.29611	1.3394	1.2135	0.924638	0.49226	0.0156495	-0.450849	-0.704894	-0.723085	-0.564876	-0.248029	0.104214	0.36596	0.515679	0.562532	0.531975	0.471034	0.393551	0.342574	0.345124	0.352566	0.400259	0.452012	0.453541	0.353857	0.154596	-0.0578981	-0.208097	-0.258693	-0.229719	-0.157814	-0.122639	-0.144408	-0.229729	-0.365917	-0.541094	-0.715633	-0.777072	-0.731963	-0.539737	-0.289907	-0.0541292	0.0619015	0.0292961	-0.10137	-0.285925	-0.430821
-0.891488	-0.897218	-0.819452	-0.643967	-0.39264	-0.178266	-0.0483201	-0.0840594	-0.290322	-0.548595	-0.734666	-0.795851	-0.67814	-0.429619	-0.16058	0.00248562	-0.0382352	-0.221583	-0.432692	-0.489257	-0.34354	-0.04985	0.257936	0.421092	0.530235	0.617939	0.700631	0.716858	0.647875	0.520263	0.432537	0.421563	0.466745	0.484677	0.402596	0.216475	0.00375911	-0.162909	-0.235947	-0.283936	-0.245099	-0.0713727	0.162327	0.339954	0.378098	0.269655	0.0659662	-0.107933	-0.170773	-0.109179
-0.631198	-0.626726	-0.585404	-0.532618	-0.470475	-0.345959	-0.139302	0.142351	0.35855	0.474129	0.439943	0.276147	0.130324	0.0122531	-0.0663706	-0.115471	-0.145237	-0.133308	-0.0927419	-0.0301296	0.0777462	0.271756	0.435353	0.575295	0.640982	0.645679	0.620034	0.555571	0.524258	0.433591	0.290664	0.164625	0.0833915	-0.0326902	-0.160661	-0.294142	-0.455759	-0.605318	-0.664198	-0.613318	-0.499431	-0.359896	-0.263913	-0.219843	-0.231765	-0.246716	-0.246324	-0.2709	-0.278734	-0.2722
-0.690493	-0.603223	-0.5167	-0.41224	-0.341837	-0.314549	-0.32609	-0.340562	-0.340183	-0.363973	-0.371556	-0.365232	-0.273011	-0.0746672	0.193082	0.398001	0.461563	0.430176	0.271323	0.080187	-0.080523	-0.136611	-0.120198	-0.102596	-0.053501	0.0433481	0.102015	0.116117	0.0465931	-0.0505181	-0.108848	-0.0474349	0.0801986	0.184314	0.226307	0.168722	0.0485961	-0.168629	-0.396407	-0.55453	-0.570525	-0.477965	-0.290025	-0.0572921	0.122781	0.186792	0.216494	0.244562	0.307833	0.316099
-0.431292	-0.352709	-0.222009	-0.0546036	0.0823034	0.127557	0.154225	0.179425	0.236231	0.243652	0.224727	0.25773	0.337044	0.462394	0.61344	0.704322	0.624219	0.36826	0.0381414	-0.313867	-0.65302	-0.866473	-0.934275	-0.895616	-0.805428	-0.723337	-0.66491	-0.584127	-0.481789	-0.317022	-0.140164	-0.0429811	-0.00741853	-0.0355543	-0.0220921	0.0545281	0.119939	0.161803	0.18868	0.214038	0.295959	0.437969	0.589084	0.66459	0.614988	0.507211	0.446576	0.427658	0.412512	0.459943
0.298192	0.206092	0.125103	0.038569	0.0345936	0.109543	0.178349	0.222384	0.250656	0.27733	0.363501	0.51288	0.671836	0.751261	0.699085	0.585715	0.521934	0.502034	0.486102	0.535994	0.582328	0.546465	0.42191	0.270279	0.0767499	-0.104612	-0.285948	-0.451056	-0.528451	-0.533217	-0.460043	-0.379062	-0.38677	-0.538468	-0.644178	-0.623739	-0.378836	-0.0467702	0.193536	0.219845	0.00743032	-0.326805	-0.621428	-0.758717	-0.767529	-0.643192	-0.497253	-0.367871	-0.273055	-0.209772
-1.36287	-1.2954	-1.16315	-1.005	-0.780812	-0.567139	-0.394311	-0.267657	-0.183124	-0.161647	-0.198318	-0.259433	-0.324131	-0.341708	-0.284338	-0.105853	0.139766	0.4088	0.56186	0.577567	0.549778	0.520143	0.578072	0.611842	0.575061	0.497541	0.362176	0.182882	-0.00749805	-0.169575	-0.289984	-0.368409	-0.438323	-0.444261	-0.387389	-0.290037	-0.14101	0.0156037	0.164971	0.274711	0.378795	0.411255	0.369199	0.271695	0.152093	0.126067	0.108234	0.119635	0.138462	0.139784
-1.86284	-1.52871	-1.14494	-0.775615	-0.516342	-0.385294	-0.374316	-0.384141	-0.361228	-0.307166	-0.232166	-0.17635	-0.116132	-0.086838	-0.129196	-0.229358	-0.374838	-0.526316	-0.601854	-0.590636	-0.502141	-0.388187	-0.289272	-0.263521	-0.216238	-0.12889	-0.00863976	0.0599209	0.0067753	-0.148486	-0.324971	-0.410504	-0.423345	-0.346491	-0.303592	-0.311427	-0.370597	-0.371274	-0.268772	-0.0645323	0.168164	0.405578	0.611072	0.742914	0.836578	0.913232	0.957464	0.979136	1.01892	1.12892
0.158117	0.149091	0.118174	0.0220581	-0.132689	-0.3098	-0.472238	-0.607195	-0.687169	-0.705993	-0.69931	-0.6265	-0.44789	-0.202738	0.0267513	0.141329	0.159499	0.0791964	-0.163622	-0.493902	-0.80416	-1.04289	-1.08001	-0.924346	-0.661286	-0.448013	-0.359643	-0.309379	-0.226288	-0.0733793	0.151189	0.304263	0.285181	0.115913	-0.10602	-0.253324	-0.266622	-0.173912	0.00808313	0.2056	0.360875	0.453894	0.412456	0.299596	0.167571	0.117837	0.187537	0.388544	0.63485	0.888632
-0.578996	-0.572014	-0.540381	-0.46046	-0.338903	-0.172176	-0.000787705	0.133946	0.214661	0.178705	0.0807743	-0.033786	-0.0769414	-0.0164616	0.157956	0.371679	0.59189	0.78241	0.851246	0.791373	0.625947	0.464185	0.296393	0.167412	0.106535	0.0962588	0.0904051	0.125364	0.249734	0.403374	0.556543	0.710734	0.804803	0.748818	0.595124	0.437094	0.241675	-0.0339132	-0.33834	-0.637962	-0.859127	-1.05395	-1.10692	-1.02877	-0.786763	-0.475988	-0.195625	-0.015055	0.00836404	0.00376182
-0.552103	-0.69717	-0.85708	-0.887474	-0.803629	-0.549791	-0.219038	0.0793487	0.271527	0.296451	0.291553	0.275701	0.316937	0.368034	0.390477	0.31932	0.202131	0.0767994	-0.0307502	-0.0884814	-0.12238	-0.0925203	-0.0302574	0.0337531	0.0834598	0.0793397	0.0364801	-0.0418853	-0.142854	-0.290542	-0.459769	-0.656787	-0.81011	-0.887121	-0.839142	-0.687041	-0.484471	-0.2285	0.0487255	0.263248	0.421216	0.513805	0.501427	0.439168	0.328498	0.277836	0.299191	0.333595	0.313607	0.217466
0.172844	0.143905	0.0911899	-0.112281	-0.384829	-0.62294	-0.760235	-0.769006	-0.644644	-0.511906	-0.362897	-0.273158	-0.271235	-0.356327	-0.478063	-0.55817	-0.475799	-0.267595	0.0141324	0.310052	0.532832	0.656408	0.68954	0.712441	0.773472	0.875621	0.934303	0.938157	0.83512	0.613188	0.344853	0.104005	-0.0506839	-0.12129	-0.204428	-0.318798	-0.468216	-0.599767	-0.62702	-0.553353	-0.426915	-0.332197	-0.357798	-0.444663	-0.543954	-0.538599	-0.481946	-0.432174	-0.359037	-0.280789
1.19825	1.15702	1.0587	0.892324	0.657051	0.362405	0.0166559	-0.275702	-0.489683	-0.519134	-0.383504	-0.163825	0.0130187	0.0332394	-0.0319746	-0.12574	-0.177988	-0.196517	-0.203889	-0.190966	-0.175917	-0.182959	-0.224149	-0.234206	-0.162836	0.0602892	0.355419	0.580199	0.658404	0.498002	0.242797	0.00193103	-0.202903	-0.366303	-0.490098	-0.618625	-0.733037	-0.817344	-0.848945	-0.811706	-0.713261	-0.571772	-0.471395	-0.368487	-0.299626	-0.235891	-0.0973885	0.132714	0.411224	0.594926
0.61821	0.517616	0.391143	0.176917	-0.0861191	-0.392249	-0.618408	-0.651846	-0.535611	-0.338436	-0.20924	-0.164274	-0.197025	-0.297941	-0.403541	-0.505275	-0.5572	-0.495351	-0.329741	-0.140075	-0.00720679	0.0437932	0.0952972	0.167176	0.274478	0.342732	0.341185	0.205918	0.00696179	-0.153649	-0.205473	-0.12266	0.01994	0.204245	0.364854	0.541806	0.70124	0.876819	1.01667	1.03691	0.862905	0.508439	0.121578	-0.159659	-0.289482	-0.300601	-0.294135	-0.304666	-0.289765	-0.236725
1.26826	1.1381	0.950538	0.718408	0.521137	0.36465	0.229309	0.117518	0.0030926	-0.0845483	-0.153626	-0.199225	-0.183877	-0.0974688	0.0631108	0.256405	0.34665	0.327997	0.233518	0.113266	0.086441	0.156993	0.248909	0.378595	0.384338	0.275928	0.0423845	-0.208057	-0.331101	-0.31659	-0.246671	-0.185963	-0.208449	-0.27098	-0.380268	-0.400708	-0.324202	-0.194095	-0.10082	-0.0798402	-0.0820097	-0.110006	-0.128249	-0.146377	-0.193033	-0.287185	-0.390264	-0.454247	-0.414704	-0.311583
0.339099	0.374238	0.368404	0.309673	0.232479	0.121723	0.0299909	-0.0423114	-0.0900387	-0.073974	0.0164673	0.184543	0.38686	0.481318	0.461794	0.362905	0.237039	0.208962	0.282807	0.379014	0.514754	0.520765	0.407294	0.162849	-0.0992836	-0.228071	-0.212882	-0.1397	-0.0761581	-0.099694	-0.165144	-0.279533	-0.300927	-0.22085	-0.084669	0.0129596	0.0349187	0.032648	0.00334494	-0.0157501	-0.0347245	-0.0835584	-0.182105	-0.289996	-0.356965	-0.315577	-0.207642	-0.08836	0.0504713	0.156268
0.707955	0.520011	0.355852	0.221714	0.198117	0.274415	0.368554	0.501377	0.507259	0.396227	0.157036	-0.0994628	-0.225482	-0.21062	-0.13901	-0.0768344	-0.0998644	-0.163907	-0.275838	-0.296772	-0.218417	-0.0851624	0.0103678	0.031855	0.0296331	0.000959831	-0.0177248	-0.0362913	-0.0840756	-0.180504	-0.286076	-0.351606	-0.311107	-0.205492	-0.0887741	0.0470733	0.150596	0.195864	0.169306	0.0873304	-0.0665346	-0.135775	-0.187238	-0.251904	-0.342193	-0.456233	-0.498455	-0.428876	-0.326072	-0.25964
0.451769	0.300955	0.167292	0.0896116	0.0342935	0.00768911	-0.00923231	-0.0527825	-0.140667	-0.236884	-0.296607	-0.259697	-0.16344	-0.0570646	0.0667455	0.161095	0.202352	0.178147	0.103436	-0.0367958	-0.0999005	-0.146803	-0.20574	-0.288028	-0.391964	-0.430444	-0.36703	-0.273336	-0.212791	-0.151612	-0.114731	-0.0395348	0.0560784	0.166999	0.259397	0.288272	0.254493	0.178082	0.122394	0.0352441	-0.0293584	-0.0712789	0.0250138	0.230733	0.485169	0.573596	0.461618	0.181442	-0.153463	-0.305044
-0.0256024	-0.12302	-0.205123	-0.247837	-0.240677	-0.239906	-0.244625	-0.275114	-0.399822	-0.530864	-0.561836	-0.456727	-0.239806	-0.0159954	0.0336954	-0.0481886	-0.136666	-0.160757	-0.0810848	0.0198799	0.010937	-0.132914	-0.370501	-0.547461	-0.538439	-0.364006	-0.170076	-0.0394955	-0.083962	-0.245336	-0.40487	-0.518126	-0.46847	-0.283945	-0.012858	0.223787	0.360528	0.393583	0.371149	0.338915	0.335452	0.413075	0.53494	0.648863	0.723356	0.733843	0.691668	0.617261	0.551185	0.408222
0.0301088	0.0421704	0.0311648	-0.00258572	-0.0299097	-0.024244	0.0575919	0.186071	0.306177	0.384712	0.395769	0.351305	0.27286	0.203198	0.052476	-0.132465	-0.339629	-0.432252	-0.410578	-0.345398	-0.28441	-0.253182	-0.301094	-0.357601	-0.375293	-0.324622	-0.19164	-0.0161951	0.105057	0.102709	-0.0313386	-0.205504	-0.399464	-0.534538	-0.561711	-0.465322	-0.220782	0.0698023	0.349719	0.496894	0.519367	0.46013	0.509599	0.670725	0.933139	1.20576	1.32044	1.2534	0.990123	0.609844
-0.263692	-0.178062	-0.0638806	0.0759758	0.167012	0.158353	0.0451385	-0.101958	-0.265774	-0.379855	-0.402804	-0.321395	-0.114862	0.13056	0.366972	0.491274	0.510254	0.460224	0.502004	0.638088	0.859718	1.08997	1.18683	1.13021	0.907846	0.586669	0.218208	-0.16951	-0.477893	-0.617969	-0.609683	-0.546096	-0.462991	-0.430326	-0.413981	-0.420897	-0.447803	-0.478569	-0.482094	-0.428422	-0.313553	-0.111674	0.0929917	0.207413	0.122077	-0.12014	-0.382487	-0.532791	-0.463464	-0.284134
0.789332	0.520757	0.255357	0.0606254	-0.0165617	-0.022575	0.00670759	0.0354145	0.0242234	-0.0158201	-0.0591253	-0.114761	-0.158208	-0.105798	-0.00610864	0.10933	0.174959	0.14426	0.025495	-0.15283	-0.307099	-0.379849	-0.32301	-0.217557	-0.156056	-0.139638	-0.184948	-0.271485	-0.335954	-0.33698	-0.267448	-0.217702	-0.314393	-0.474449	-0.756913	-1.026	-1.17159	-1.10475	-0.864071	-0.571525	-0.322207	-0.154958	-0.0898443	-0.0567986	-0.0270311	0.0745027	0.188492	0.271803	0.269249	0.260583
0.156641	0.266737	0.376447	0.483524	0.532046	0.482956	0.304201	0.0534974	-0.187424	-0.342515	-0.453822	-0.512816	-0.54859	-0.572626	-0.534006	-0.442514	-0.324201	-0.267297	-0.289153	-0.388382	-0.464016	-0.479804	-0.456765	-0.396135	-0.313636	-0.234744	-0.175586	-0.0362892	0.180689	0.471214	0.696354	0.818966	0.856306	0.850113	0.897209	0.981968	1.0318	1.04441	0.96189	0.763245	0.559204	0.452691	0.455775	0.468555	0.420334	0.28215	0.0995279	-0.0331788	-0.130805	-0.16188
-0.250694	-0.297989	-0.329833	-0.29838	-0.215074	-0.107678	-0.0545215	-0.0749384	-0.167633	-0.238285	-0.253034	-0.231512	-0.174875	-0.0978092	-0.0241126	0.0311498	0.161273	0.363961	0.635353	0.845666	0.960204	0.995084	0.989299	1.03329	1.11247	1.15902	1.1708	1.09371	0.908152	0.717548	0.61805	0.620931	0.632869	0.587824	0.458741	0.288145	0.164178	0.0729813	0.0439532	-0.0033495	-0.0399596	-0.10233	-0.209772	-0.357006	-0.549639	-0.717135	-0.802736	-0.797203	-0.749018	-0.743047
-0.319017	-0.338466	-0.291914	-0.20143	-0.0931281	-0.0409781	-0.0612396	-0.153228	-0.223343	-0.23798	-0.216622	-0.160416	-0.0839364	-0.0108005	0.0440415	0.173174	0.37432	0.643648	0.852361	0.966026	1.00064	0.994901	1.03856	1.11713	1.16333	1.17502	1.09852	0.914371	0.725217	0.626476	0.629336	0.641183	0.596481	0.468379	0.299082	0.176058	0.0855547	0.0567474	0.00980461	-0.026527	-0.088423	-0.195047	-0.341161	-0.532328	-0.69855	-0.7835	-0.778009	-0.73019	-0.724265	-0.812505
-0.158626	-0.126275	-0.0768228	-0.0096252	0.054192	0.106476	0.233562	0.43152	0.696578	0.901983	1.01385	1.04791	1.04226	1.08523	1.16256	1.20802	1.21953	1.14424	0.96301	0.776854	0.679679	0.682493	0.694152	0.650158	0.524087	0.357473	0.236399	0.147331	0.11898	0.0727815	0.0370258	-0.0238892	-0.128824	-0.272621	-0.460758	-0.624345	-0.707949	-0.702545	-0.655484	-0.649652	-0.736494	-0.813211	-0.830756	-0.743763	-0.591587	-0.455663	-0.376874	-0.379048	-0.475013	-0.617134
1.68821	1.53975	1.34215	1.12517	0.986719	0.881644	0.845365	0.786246	0.740491	0.66254	0.528259	0.344247	0.103495	-0.105842	-0.212826	-0.205911	-0.145689	-0.138227	-0.249355	-0.347527	-0.369978	-0.258657	-0.0639224	0.110014	0.210837	0.208056	0.0852529	-0.0966137	-0.230417	-0.254335	-0.147344	0.0350697	0.218827	0.328093	0.296823	0.171705	-0.0139218	-0.176596	-0.265886	-0.253471	-0.178065	-0.10801	-0.0517466	-0.00747585	0.0462326	0.0794769	0.0801323	0.0480817	-0.0117575	-0.168767
-0.549274	-0.318639	-0.103716	0.0723912	0.114633	0.000796138	-0.113661	-0.139836	-0.0100488	0.216988	0.419777	0.537324	0.534081	0.390908	0.178874	0.0228758	-0.00500936	0.119729	0.3324	0.546639	0.674029	0.637573	0.4917	0.275282	0.0856243	-0.0184766	-0.00400259	0.0839118	0.165588	0.231183	0.282797	0.345415	0.384174	0.384938	0.347571	0.277806	0.0947517	-0.139221	-0.330209	-0.493105	-0.595432	-0.664111	-0.767981	-0.861155	-0.895658	-0.813166	-0.581406	-0.263163	0.0241481	0.135951
-0.582916	-0.609256	-0.638465	-0.670015	-0.74467	-0.817173	-0.84345	-0.780626	-0.604123	-0.361756	-0.142946	-0.0577994	-0.158059	-0.333613	-0.465504	-0.498438	-0.375041	-0.145802	0.0577711	0.156197	0.0814062	-0.09811	-0.322111	-0.491543	-0.603307	-0.638472	-0.61237	-0.508085	-0.274689	0.0225041	0.304677	0.4941	0.540039	0.488328	0.318954	0.177186	0.113928	0.158461	0.360739	0.623156	0.883808	0.951674	0.857829	0.631996	0.422099	0.281559	0.257609	0.342479	0.432366	0.495647
-0.275437	-0.105365	0.181884	0.481175	0.765954	0.836869	0.730335	0.473967	0.235689	0.076147	0.0489591	0.145304	0.247345	0.319182	0.31755	0.308692	0.19435	0.0312381	-0.166598	-0.3038	-0.288127	-0.132474	0.0799983	0.209823	0.268726	0.239771	0.150405	0.0212398	-0.143754	-0.360314	-0.562481	-0.643601	-0.568316	-0.350017	-0.092336	0.0929588	0.115339	-0.0146489	-0.145685	-0.173524	-0.147225	-0.109623	-0.123967	-0.18486	-0.257247	-0.31258	-0.304614	-0.229195	-0.124563	-0.0440053
-0.0463256	-0.133704	-0.238187	-0.386285	-0.596641	-0.796732	-0.879446	-0.802682	-0.580094	-0.317349	-0.128413	-0.105593	-0.238135	-0.371746	-0.400132	-0.373316	-0.334976	-0.349602	-0.411691	-0.4855	-0.541921	-0.533798	-0.456897	-0.350209	-0.268068	-0.239237	-0.290661	-0.340475	-0.364768	-0.361115	-0.293503	-0.177723	-0.0558127	-0.0227458	-0.0548088	-0.0854711	-0.0777856	0.0250543	0.168718	0.328376	0.433915	0.46558	0.44125	0.426424	0.515755	0.683448	0.794138	0.790981	0.732934	0.570418
0.78577	0.645506	0.482865	0.345503	0.159367	0.0114153	-0.0809136	-0.141972	-0.117751	-0.00983976	0.193032	0.398225	0.531455	0.538463	0.448767	0.385934	0.400252	0.466572	0.584992	0.71306	0.795258	0.813727	0.734802	0.560109	0.323596	0.130552	0.0022637	-0.0402819	-0.0309539	0.0137541	0.0385961	-0.0285177	-0.16865	-0.32718	-0.475751	-0.580218	-0.594542	-0.49995	-0.381096	-0.271748	-0.181198	-0.157031	-0.169755	-0.254518	-0.377641	-0.539135	-0.68727	-0.707117	-0.638123	-0.503778
0.0467841	0.0411948	0.0642678	0.107408	0.125491	0.0534802	-0.0943426	-0.261573	-0.418297	-0.528498	-0.543608	-0.443825	-0.318448	-0.203099	-0.107579	-0.0820859	-0.0955085	-0.184923	-0.314803	-0.48516	-0.641425	-0.66236	-0.589581	-0.447862	-0.369196	-0.316686	-0.280766	-0.252024	-0.252228	-0.307151	-0.357863	-0.353387	-0.265854	-0.174481	-0.139307	-0.157446	-0.114641	0.0218763	0.199572	0.315022	0.362994	0.32531	0.215763	0.0689671	-0.0308507	0.0314079	0.181208	0.368688	0.458964	0.428753
-0.627035	-0.422304	-0.231927	-0.0941282	-0.0464662	-0.0563984	-0.0177539	0.105493	0.265917	0.370145	0.413454	0.379433	0.280534	0.148007	0.0578915	0.114099	0.249337	0.418595	0.500096	0.472821	0.373908	0.286384	0.276268	0.397929	0.538308	0.633498	0.672212	0.648945	0.671536	0.743524	0.8431	0.923945	0.964891	0.99141	0.99637	0.922791	0.752157	0.514703	0.202435	-0.0961307	-0.377478	-0.546173	-0.53787	-0.41767	-0.241157	-0.182674	-0.264452	-0.415074	-0.546269	-0.635924
1.46872	1.43023	1.39048	1.35498	1.34878	1.33752	1.26557	1.09873	0.866554	0.561225	0.269294	-0.00580118	-0.170748	-0.162629	-0.0451005	0.127491	0.184673	0.104713	-0.0425616	-0.170842	-0.258504	-0.287829	-0.328098	-0.387561	-0.462148	-0.545758	-0.601233	-0.641886	-0.675411	-0.623752	-0.444954	-0.139782	0.256859	0.622568	0.822645	0.781414	0.501237	0.0752202	-0.360911	-0.673686	-0.794243	-0.744526	-0.575022	-0.360413	-0.203733	-0.169041	-0.266887	-0.480646	-0.674585	-0.771223
1.55401	1.36328	1.05591	0.618977	0.0951236	-0.414154	-0.775817	-0.915219	-0.85773	-0.661732	-0.413578	-0.232408	-0.192293	-0.305433	-0.552605	-0.776857	-0.888601	-0.868672	-0.706297	-0.447584	-0.240668	-0.132949	-0.131111	-0.187322	-0.252189	-0.306779	-0.313401	-0.263425	-0.202608	-0.147682	-0.0937339	0.00539831	0.159927	0.249613	0.268629	0.203649	0.0804775	0.0181341	0.133117	0.321695	0.529374	0.628558	0.572499	0.382975	0.15614	-0.0103003	-0.14268	-0.228127	-0.280477	-0.229549
-0.960792	-0.829884	-0.631715	-0.370241	-0.170359	-0.0679733	-0.0660285	-0.125492	-0.194111	-0.251858	-0.258864	-0.205997	-0.141662	-0.0835586	-0.0264896	0.0783771	0.241845	0.336719	0.356835	0.288096	0.157799	0.0918497	0.213484	0.412971	0.632664	0.737585	0.678283	0.477795	0.237838	0.0617704	-0.0782677	-0.168657	-0.224035	-0.170162	-0.0531979	0.0881222	0.216872	0.350033	0.472949	0.575062	0.657684	0.663582	0.573903	0.387594	0.173332	-0.0337217	-0.194412	-0.238163	-0.187665	-0.0287868
-0.26025	-0.121904	0.0193557	0.153384	0.270535	0.39086	0.5098	0.608611	0.68856	0.694267	0.607489	0.427206	0.219875	0.0195183	-0.135974	-0.17831	-0.129446	0.0242935	0.156246	0.283006	0.348797	0.3182	0.146658	-0.0927022	-0.375144	-0.605478	-0.694373	-0.622178	-0.370617	-0.0815469	0.191029	0.396966	0.512813	0.602422	0.621081	0.600536	0.586378	0.603955	0.611458	0.608529	0.464436	0.151516	-0.269216	-0.672296	-0.895567	-0.900605	-0.748521	-0.472565	-0.194631	-0.0235046
0.376799	0.375065	0.335465	0.293732	0.272522	0.282124	0.288302	0.28589	0.167241	-0.0904239	-0.436864	-0.76877	-0.952616	-0.956764	-0.831535	-0.604307	-0.37545	-0.23454	-0.220733	-0.318501	-0.403912	-0.430819	-0.396585	-0.385133	-0.474601	-0.638675	-0.735349	-0.739176	-0.649419	-0.55649	-0.4459	-0.319213	-0.176307	-0.0552472	0.0295758	0.0107552	-0.108939	-0.197641	-0.120082	0.099636	0.331385	0.501087	0.518411	0.464397	0.41922	0.402643	0.439172	0.492459	0.494345	0.409412
-0.383525	-0.575388	-0.643638	-0.518476	-0.268163	-0.0111087	0.169981	0.188468	0.130829	0.0826205	0.0649312	0.103912	0.160775	0.162787	0.0721542	0.0158009	0.0332703	0.128825	0.227642	0.268068	0.26139	0.222269	0.213325	0.237036	0.245983	0.229077	0.244014	0.266202	0.285825	0.336124	0.415588	0.499962	0.522552	0.547162	0.553631	0.546721	0.510292	0.432022	0.257734	-0.0217501	-0.362376	-0.659328	-0.865165	-0.967893	-0.890728	-0.708917	-0.492232	-0.291563	-0.175573	-0.116648
0.467869	0.340772	0.245683	0.219394	0.238781	0.242609	0.225182	0.24058	0.263452	0.28368	0.335529	0.417442	0.504417	0.527704	0.553073	0.55974	0.552617	0.515066	0.434383	0.254723	-0.0333764	-0.384502	-0.690608	-0.902789	-1.00868	-0.929141	-0.741725	-0.518361	-0.311506	-0.191941	-0.131199	-0.157368	-0.274737	-0.396472	-0.435669	-0.4211	-0.284503	-0.134596	0.0504655	0.159186	0.192436	0.081683	-0.0993858	-0.242195	-0.303805	-0.294102	-0.23028	-0.174087	-0.171107	-0.27063
-0.382352	-0.514991	-0.636347	-0.738496	-0.787589	-0.698166	-0.519744	-0.307097	-0.110168	0.00365992	0.0614874	0.0365744	-0.0751629	-0.191057	-0.228374	-0.214504	-0.0844607	0.0582533	0.234435	0.337938	0.369593	0.264155	0.091774	-0.0441825	-0.102836	-0.0935987	-0.0328397	0.0206577	0.0234942	-0.0712532	-0.200176	-0.257273	-0.212849	-0.0857716	0.0956245	0.297003	0.527254	0.720459	0.799772	0.713155	0.515072	0.23187	-0.024802	-0.182866	-0.224108	-0.165964	-0.0680283	-0.0210612	-0.00843846	0.0343842
0.652881	0.387383	0.15611	0.0122455	-0.0430506	-0.0370323	0.01981	0.0698589	0.0725125	-0.0161272	-0.13674	-0.190156	-0.148595	-0.0297097	0.139993	0.32839	0.543798	0.724549	0.798749	0.717716	0.532402	0.267455	0.0273296	-0.120545	-0.159128	-0.104733	-0.0131102	0.0308293	0.0426383	0.0827005	0.12866	0.189576	0.245877	0.312936	0.347047	0.244077	0.0943866	-0.00138051	0.0439216	0.21052	0.413949	0.493254	0.401868	0.149008	-0.132735	-0.384232	-0.558499	-0.598306	-0.544147	-0.472905
1.13501	0.942181	0.735204	0.477755	0.249336	0.108546	0.0684802	0.124966	0.220108	0.265736	0.277999	0.3196	0.367326	0.430582	0.489046	0.558682	0.594103	0.487177	0.331735	0.232289	0.279331	0.45233	0.663576	0.745927	0.65103	0.388456	0.0958878	-0.165272	-0.346235	-0.38757	-0.331331	-0.257351	-0.237872	-0.258921	-0.2417	-0.138461	-0.0346949	-0.0330789	-0.129945	-0.270471	-0.405101	-0.439622	-0.377578	-0.313985	-0.310758	-0.419628	-0.529572	-0.61612	-0.642567	-0.541893
-0.0926572	-0.26375	-0.506263	-0.781469	-1.02768	-1.15349	-1.13758	-1.02443	-0.892544	-0.783182	-0.701687	-0.598335	-0.469187	-0.367406	-0.329612	-0.375741	-0.442883	-0.440534	-0.387462	-0.288461	-0.16663	-0.0738568	0.0233398	0.0866427	0.127732	0.180591	0.206888	0.256725	0.316514	0.377643	0.444351	0.519498	0.606162	0.740939	0.846677	0.898562	0.819677	0.636169	0.447951	0.304389	0.238344	0.242123	0.339421	0.572568	0.841927	1.0511	1.09739	0.924413	0.649941	0.291413
-0.296923	-0.367095	-0.409915	-0.380204	-0.314522	-0.213682	-0.0987179	-0.0111738	0.0805444	0.140279	0.179053	0.228932	0.253747	0.300775	0.357194	0.414878	0.477825	0.548738	0.630516	0.757697	0.857475	0.906436	0.831997	0.658833	0.481223	0.345753	0.28343	0.286996	0.37881	0.598816	0.852993	1.05038	1.09406	0.93083	0.671828	0.333508	0.110948	0.00658466	-0.0273621	-0.0456191	-0.0718052	-0.146495	-0.23441	-0.232072	-0.193314	-0.156189	-0.242782	-0.42937	-0.679468	-0.872263
0.762076	0.915854	1.0149	1.06252	0.995943	0.848649	0.693596	0.575329	0.520921	0.524034	0.604188	0.796255	1.01815	1.19047	1.2286	1.0861	0.859995	0.564639	0.370344	0.279234	0.249598	0.233659	0.210799	0.145594	0.0688437	0.0708847	0.104721	0.137131	0.0615347	-0.101357	-0.319694	-0.488005	-0.537596	-0.487031	-0.37124	-0.289941	-0.252637	-0.296831	-0.387035	-0.502432	-0.620766	-0.69474	-0.729321	-0.668772	-0.605857	-0.527753	-0.487422	-0.490917	-0.539564	-0.604867
1.73825	1.49038	1.24937	0.95528	0.770772	0.682207	0.649499	0.631909	0.606678	0.534714	0.450007	0.45226	0.489603	0.525373	0.44194	0.262162	0.0211906	-0.164569	-0.219301	-0.163493	-0.035699	0.0540284	0.0951997	0.0464242	-0.0531314	-0.180491	-0.311092	-0.392736	-0.430901	-0.364075	-0.294638	-0.208437	-0.163926	-0.167782	-0.221472	-0.293545	-0.343055	-0.332018	-0.304024	-0.336852	-0.446215	-0.597375	-0.681172	-0.655924	-0.466926	-0.20127	0.0320636	0.106552	0.11628	0.0825177
-0.17451	-0.00384922	0.160934	0.333993	0.441449	0.481682	0.424876	0.308929	0.1606	0.0084965	-0.0865894	-0.131039	-0.0532098	0.0276596	0.128054	0.179893	0.175402	0.112872	0.0289328	-0.0287296	-0.0158748	0.0167285	-0.0215048	-0.148874	-0.324922	-0.422516	-0.393111	-0.172995	0.136401	0.408151	0.494904	0.506233	0.466912	0.397577	0.27119	0.0663905	-0.164868	-0.358936	-0.430892	-0.376467	-0.20338	-0.0403921	0.0712377	0.0963767	0.00135311	-0.175282	-0.416214	-0.600581	-0.614216	-0.489224
-0.697164	-0.539349	-0.367272	-0.166157	-0.00144093	0.0997798	0.123052	0.0350836	-0.128438	-0.351482	-0.522161	-0.534784	-0.419072	-0.317463	-0.206118	-0.161047	-0.0610441	0.0755594	0.252102	0.389635	0.331927	0.107586	-0.210048	-0.490641	-0.65496	-0.682091	-0.635953	-0.597131	-0.587276	-0.636393	-0.646782	-0.561865	-0.391955	-0.18682	-0.00423237	0.153782	0.32787	0.537418	0.70437	0.76893	0.698486	0.533103	0.430372	0.40991	0.507719	0.623984	0.661486	0.553158	0.413543	0.269883
0.410345	0.0560418	-0.278687	-0.542255	-0.680438	-0.702033	-0.654717	-0.614902	-0.604795	-0.655168	-0.665822	-0.578734	-0.40448	-0.1941	-0.00684416	0.15521	0.333749	0.548655	0.719875	0.786085	0.713841	0.544229	0.438872	0.417886	0.518196	0.637433	0.675895	0.564797	0.421613	0.274279	0.253116	0.320708	0.456374	0.551193	0.520151	0.369932	0.156672	-0.0528557	-0.247291	-0.44879	-0.610163	-0.688388	-0.637897	-0.455501	-0.278592	-0.207973	-0.242777	-0.287078	-0.287997	-0.211758
0.56041	0.757636	0.834	0.773694	0.592655	0.349285	0.111138	-0.109856	-0.338878	-0.522294	-0.611203	-0.553815	-0.346506	-0.145432	-0.065167	-0.104726	-0.155077	-0.156122	-0.0694692	0.118412	0.348992	0.485237	0.486656	0.418594	0.303948	0.164512	-0.0237325	-0.215818	-0.399405	-0.540021	-0.609993	-0.616617	-0.560073	-0.49631	-0.43377	-0.376968	-0.302535	-0.156653	0.01684	0.202808	0.35955	0.497515	0.519477	0.395194	0.155975	-0.0594591	-0.208673	-0.297244	-0.320383	-0.298588
0.106632	0.0950378	0.00152367	-0.13787	-0.229464	-0.23924	-0.146011	0.0561311	0.304212	0.450798	0.452325	0.379097	0.25575	0.10573	-0.0968026	-0.303468	-0.500989	-0.652278	-0.727561	-0.734688	-0.673851	-0.605249	-0.537962	-0.476849	-0.396766	-0.239812	-0.0531506	0.146933	0.315571	0.464008	0.487637	0.353921	0.0965451	-0.135241	-0.29578	-0.391074	-0.415969	-0.39252	-0.294591	-0.158524	0.0613213	0.231614	0.274554	0.175322	0.0670083	0.0426203	0.123902	0.23352	0.316727	0.347467
-0.209047	-0.373186	-0.477381	-0.549442	-0.594293	-0.603149	-0.581887	-0.493091	-0.369712	-0.170369	-0.0159569	0.0229791	-0.0669992	-0.165212	-0.187326	-0.113624	-0.0142279	0.0612192	0.0890928	0.0133714	-0.13557	-0.209625	-0.176382	-0.0836008	0.00671307	0.0720356	0.0738294	0.0198641	-0.105427	-0.216977	-0.287679	-0.284813	-0.184102	-0.132361	-0.131659	-0.175559	-0.131438	-0.0475088	0.0739474	0.111066	0.0668234	-0.0168262	0.00937441	0.161319	0.346507	0.475138	0.514296	0.480744	0.435205	0.436397
-0.0141468	0.11615	0.216503	0.263737	0.263939	0.21346	0.172966	0.174026	0.212134	0.271153	0.277942	0.268585	0.200878	0.0530466	-0.0593004	-0.11958	-0.166237	-0.158867	-0.116628	-0.0176834	0.120207	0.255578	0.325833	0.325106	0.304319	0.315183	0.303268	0.208286	0.0493038	-0.160126	-0.397931	-0.588826	-0.691152	-0.711172	-0.674216	-0.629152	-0.573591	-0.426116	-0.273909	-0.240937	-0.351268	-0.505993	-0.556119	-0.415092	-0.107797	0.23886	0.492887	0.513373	0.42969	0.246794
0.804914	0.617745	0.453995	0.31494	0.240361	0.268362	0.340174	0.409006	0.416893	0.457569	0.55657	0.676841	0.769928	0.797749	0.69206	0.445778	0.092999	-0.214337	-0.385347	-0.445357	-0.368861	-0.220812	0.0149913	0.297612	0.612414	0.825486	0.885753	0.747023	0.43527	0.11228	-0.126738	-0.137191	-0.0485785	0.068643	0.0965275	0.0631665	-0.0217533	-0.116655	-0.186713	-0.26034	-0.3303	-0.358931	-0.353694	-0.317171	-0.276689	-0.253796	-0.251141	-0.270347	-0.311562	-0.387493
0.464305	0.415638	0.354816	0.34833	0.36038	0.411644	0.460874	0.488713	0.491942	0.468587	0.418465	0.326127	0.143671	-0.0880877	-0.323119	-0.490658	-0.507455	-0.34826	-0.0775801	0.147293	0.284232	0.341599	0.369751	0.407344	0.46854	0.532264	0.604665	0.550941	0.414963	0.265095	0.208435	0.186685	0.130831	0.0584171	-0.0321863	-0.0977142	-0.202235	-0.348495	-0.580693	-0.811704	-0.967528	-0.956839	-0.753281	-0.476879	-0.189248	-0.00334442	0.0556909	0.0654026	-0.0124479	-0.100961
0.717923	0.54644	0.428187	0.410604	0.409264	0.367598	0.30079	0.2172	0.156745	0.060316	-0.0746216	-0.288845	-0.501972	-0.645733	-0.635872	-0.448072	-0.193067	0.0722977	0.243809	0.298275	0.307235	0.235411	0.153749	0.066207	0.0412324	0.0422613	0.0358393	0.0649862	0.0588463	0.0305592	0.0267625	0.0734137	0.147527	0.269822	0.353882	0.384233	0.302678	0.141543	-0.040565	-0.13294	-0.154022	-0.107365	-0.0445535	0.00986596	0.0824334	0.126426	0.175046	0.143215	0.068648	-0.0275649
0.0259724	-0.0509842	-0.0541094	-0.0288046	0.026176	0.0821603	0.127961	0.189035	0.22606	0.26698	0.24019	0.177433	0.0964582	0.0583045	0.0432245	0.106599	0.190233	0.255331	0.222519	0.0307386	-0.25185	-0.517373	-0.632814	-0.500186	-0.186117	0.195298	0.46898	0.609764	0.621822	0.533454	0.397035	0.249358	0.194095	0.138398	0.0979002	0.0702347	0.0279952	-0.000420771	-0.0310009	-0.0366895	-0.0286213	-0.0363258	-0.151746	-0.266755	-0.40858	-0.488361	-0.420416	-0.229733	-0.0236599	0.183942
0.406518	0.41275	0.377458	0.28987	0.17392	0.0453828	-0.00515168	-0.0560839	-0.0931165	-0.118415	-0.157041	-0.183025	-0.210989	-0.216191	-0.208813	-0.215859	-0.321404	-0.426573	-0.556264	-0.629218	-0.567087	-0.392718	-0.204276	-0.0144364	0.112803	0.19481	0.178584	0.00662138	-0.26304	-0.520887	-0.716356	-0.726453	-0.640681	-0.545254	-0.521751	-0.552311	-0.552505	-0.518381	-0.456377	-0.364161	-0.268129	-0.201015	-0.158504	-0.0430431	0.168503	0.422417	0.611154	0.663106	0.591872	0.42746
-0.185134	-0.0887399	-0.00761465	0.0613365	0.0390787	-0.125388	-0.399257	-0.661127	-0.859647	-0.869902	-0.782791	-0.685875	-0.662006	-0.693042	-0.693239	-0.658583	-0.595611	-0.501956	-0.404426	-0.336264	-0.29309	-0.175827	0.0390196	0.296896	0.488578	0.541341	0.468995	0.302018	0.18562	0.168136	0.298032	0.48106	0.609804	0.663398	0.676529	0.648473	0.625613	0.618087	0.639269	0.73475	0.816987	0.798968	0.676959	0.572573	0.49764	0.45665	0.388803	0.297851	0.171028	0.0266495
0.409225	0.504232	0.549657	0.502368	0.375134	0.17816	0.0500887	0.0308518	0.173775	0.375158	0.516813	0.575781	0.59023	0.559361	0.534208	0.525927	0.549233	0.654289	0.744774	0.724947	0.590703	0.475849	0.3934	0.348299	0.273649	0.173576	0.0340339	-0.124824	-0.228974	-0.301637	-0.355234	-0.4343	-0.522905	-0.640948	-0.746087	-0.756225	-0.608646	-0.414423	-0.172907	-0.0336679	0.0354576	0.0089605	-0.0643013	-0.169547	-0.277798	-0.384481	-0.436926	-0.501942	-0.578634	-0.669624
0.883289	0.753537	0.685626	0.68586	0.78191	0.876705	0.855199	0.709583	0.585001	0.495569	0.446648	0.365673	0.257124	0.105762	-0.0665517	-0.179524	-0.258342	-0.316478	-0.402242	-0.498352	-0.626394	-0.740438	-0.751435	-0.591356	-0.380681	-0.118708	0.0323258	0.107306	0.078565	-0.00090252	-0.115063	-0.232484	-0.348203	-0.405091	-0.475614	-0.558801	-0.657499	-0.717077	-0.705462	-0.613615	-0.478739	-0.355024	-0.213416	-0.0858802	0.0492885	0.169318	0.277239	0.348262	0.361167	0.32589
-0.154937	-0.13733	-0.0964003	-0.0897654	-0.113235	-0.186078	-0.2892	-0.426584	-0.54895	-0.560749	-0.38899	-0.162944	0.118143	0.280196	0.360648	0.329809	0.244544	0.122054	-0.00393369	-0.128096	-0.189134	-0.264803	-0.35406	-0.459959	-0.523884	-0.511422	-0.412873	-0.268156	-0.135415	0.016525	0.153366	0.298397	0.427184	0.542979	0.619184	0.63303	0.595179	0.489124	0.331508	0.182898	0.132063	0.200576	0.319453	0.432338	0.464274	0.339532	0.12512	-0.156495	-0.404199	-0.606646
-0.272578	-0.266365	-0.20514	-0.0848262	0.0444985	0.152512	0.181181	0.0691995	-0.123278	-0.376084	-0.598449	-0.780186	-0.891405	-0.940837	-0.88547	-0.740276	-0.543354	-0.380224	-0.214246	-0.0351472	0.165869	0.324689	0.312242	0.209474	0.0876181	0.072218	0.21563	0.506702	0.769236	0.883426	0.780966	0.534844	0.217499	-0.0574238	-0.239704	-0.342229	-0.384126	-0.255586	-0.028907	0.221968	0.427209	0.514359	0.454108	0.355583	0.286547	0.346972	0.494007	0.610645	0.625206	0.522971
0.363812	0.184049	0.0667278	0.0714701	0.22227	0.501049	0.751032	0.859763	0.762201	0.527846	0.225672	-0.0361084	-0.209674	-0.307299	-0.347193	-0.224797	-0.00895483	0.229927	0.425356	0.50834	0.450969	0.357154	0.291419	0.348955	0.488961	0.600023	0.613888	0.51654	0.343377	0.165955	0.0242943	-0.122582	-0.251063	-0.310501	-0.313572	-0.250017	-0.160686	-0.0791808	-0.0275953	-0.00101059	-0.0305932	-0.0869784	-0.147851	-0.231444	-0.361267	-0.531171	-0.67743	-0.693662	-0.620217	-0.54045
-0.18856	-0.287633	-0.341948	-0.396602	-0.39988	-0.391727	-0.345762	-0.182173	0.0652461	0.297661	0.348548	0.213163	0.016898	-0.117132	-0.128114	-0.0262671	0.127087	0.236265	0.360426	0.487514	0.593407	0.628615	0.63529	0.569566	0.438543	0.210651	-0.0634547	-0.298043	-0.501515	-0.671782	-0.772372	-0.836586	-0.743867	-0.535203	-0.299089	-0.025362	0.178512	0.295955	0.318286	0.260858	0.150583	0.0620821	0.00752168	0.0400757	0.123343	0.207509	0.232225	0.248522	0.292575	0.386507
0.799059	0.60235	0.42051	0.253616	0.0946716	-0.0216783	-0.0814816	-0.0457994	0.0454691	0.137723	0.164814	0.182677	0.230962	0.333921	0.417454	0.403075	0.318893	0.138808	-0.0704874	-0.284626	-0.451184	-0.52955	-0.531415	-0.546569	-0.578019	-0.698306	-0.86491	-0.992145	-1.04411	-1.01524	-0.917729	-0.844032	-0.772857	-0.701096	-0.596686	-0.43456	-0.303684	-0.188126	-0.0448656	0.146102	0.345407	0.518957	0.573865	0.586488	0.496297	0.411525	0.389975	0.378517	0.393846	0.392642
0.702014	0.718768	0.740218	0.755208	0.766316	0.753045	0.698134	0.518927	0.29312	0.0204319	-0.289759	-0.518401	-0.639858	-0.675242	-0.631192	-0.570089	-0.517093	-0.473532	-0.461781	-0.484535	-0.488769	-0.373819	-0.174315	0.123615	0.433467	0.675475	0.810408	0.791328	0.727734	0.639092	0.531186	0.332618	0.109228	-0.108747	-0.260395	-0.322946	-0.33986	-0.306956	-0.21912	-0.0655268	0.0785862	0.122027	-0.0254621	-0.282907	-0.556437	-0.637675	-0.539277	-0.328093	-0.0875362	0.080659
-0.610287	-0.606425	-0.632853	-0.637615	-0.515749	-0.31579	-0.0163931	0.294983	0.538183	0.67378	0.654606	0.590699	0.50162	0.393184	0.193638	-0.0308508	-0.249899	-0.402294	-0.465152	-0.482149	-0.449083	-0.360815	-0.206466	-0.0616438	-0.0179892	-0.166204	-0.424916	-0.699792	-0.78143	-0.682548	-0.470324	-0.228584	-0.0595608	-0.0492288	-0.173679	-0.373513	-0.585633	-0.698693	-0.683097	-0.495544	-0.213246	0.0436269	0.225157	0.339553	0.456645	0.59689	0.798697	0.965116	1.06367	1.08206
0.389136	0.412571	0.370877	0.203149	-0.0204184	-0.245004	-0.407916	-0.475112	-0.493282	-0.457934	-0.363574	-0.198574	-0.043758	0.00290914	-0.155534	-0.432099	-0.725944	-0.813216	-0.707509	-0.480641	-0.222218	-0.0415313	-0.0304863	-0.163524	-0.377149	-0.603907	-0.724769	-0.708097	-0.507601	-0.205822	0.0687771	0.262835	0.385125	0.510297	0.66022	0.875953	1.05386	1.15921	1.17887	1.1073	0.977775	0.787669	0.597633	0.448552	0.351192	0.241033	0.117413	-0.0453823	-0.158789	-0.275515
-0.815056	-0.877904	-0.966874	-1.00716	-0.954664	-0.769835	-0.502011	-0.258309	-0.0860862	0.0224443	0.133533	0.266587	0.458047	0.615933	0.709432	0.72688	0.663364	0.548412	0.379696	0.211042	0.0787352	-0.00767073	-0.105435	-0.215145	-0.359624	-0.460271	-0.563862	-0.654743	-0.751809	-0.809707	-0.772842	-0.62238	-0.441614	-0.292433	-0.132104	-0.022117	0.130132	0.328662	0.504663	0.672199	0.825677	0.952247	0.997381	0.927806	0.742256	0.491763	0.270682	0.129111	0.0268188	-0.129653
-0.550064	-0.594265	-0.650177	-0.728881	-0.777684	-0.744952	-0.608707	-0.44502	-0.309934	-0.164754	-0.0651592	0.0727051	0.252477	0.411848	0.563554	0.702531	0.817142	0.858013	0.795011	0.626993	0.400167	0.199975	0.0717806	-0.020847	-0.162535	-0.314305	-0.386314	-0.290587	-0.0495666	0.260408	0.47077	0.467989	0.343896	0.221514	0.20668	0.320603	0.446263	0.437976	0.254151	-0.0993238	-0.473492	-0.681213	-0.688077	-0.569218	-0.404412	-0.284772	-0.174422	-0.08744	0.0205492	0.0504647
0.32824	0.55611	0.74077	0.817616	0.770142	0.607876	0.369311	0.158759	0.0239308	-0.0734903	-0.22251	-0.382135	-0.45787	-0.357189	-0.103696	0.22232	0.443568	0.440643	0.310128	0.181413	0.165811	0.28563	0.417793	0.409077	0.215739	-0.156028	-0.54956	-0.76803	-0.77525	-0.65024	-0.476905	-0.351074	-0.235013	-0.14353	-0.0299519	0.00151179	-0.03836	-0.159081	-0.204291	-0.13378	0.0114575	0.203214	0.318903	0.347583	0.289295	0.208771	0.135293	0.0864798	0.0381667	-0.0532631
0.755384	0.757919	0.730638	0.655177	0.512882	0.33375	0.173833	0.0646554	0.0982833	0.275322	0.461861	0.510188	0.441431	0.313907	0.188126	0.177015	0.287201	0.459733	0.576629	0.607161	0.580088	0.496743	0.300819	0.103789	-0.0645677	-0.186154	-0.250813	-0.252159	-0.209955	-0.111992	0.0516567	0.23236	0.398889	0.444344	0.411664	0.296702	0.157033	-0.0137502	-0.0883826	-0.101271	-0.0780512	-0.0585922	-0.12884	-0.268572	-0.439008	-0.601765	-0.74558	-0.91455	-1.00734	-1.03268
0.0589981	0.173462	0.27427	0.396839	0.567731	0.748333	0.912195	0.956922	0.924766	0.811645	0.674213	0.506164	0.432727	0.420045	0.442893	0.46204	0.392917	0.255423	0.0877157	-0.0724351	-0.213946	-0.380211	-0.471517	-0.496452	-0.467349	-0.411661	-0.321508	-0.213224	-0.0784557	0.104395	0.291621	0.427437	0.453853	0.346857	0.181757	0.0222346	-0.13743	-0.248257	-0.363241	-0.406679	-0.39909	-0.351117	-0.281242	-0.246579	-0.263305	-0.228767	-0.159454	-0.105215	-0.0687699	-0.0957755
0.817967	0.728277	0.604809	0.565819	0.568649	0.597363	0.617068	0.545933	0.404438	0.231851	0.0670401	-0.0785889	-0.249692	-0.343654	-0.369315	-0.339365	-0.282057	-0.18928	-0.0778452	0.0608443	0.249016	0.44169	0.581458	0.608643	0.498532	0.328629	0.164464	0.000154209	-0.113899	-0.232228	-0.27693	-0.26912	-0.219751	-0.147843	-0.112171	-0.129384	-0.0938404	-0.0225113	0.033306	0.0708119	0.0430205	-0.0515254	-0.138963	-0.226398	-0.27293	-0.393856	-0.517294	-0.582947	-0.52388	-0.349472
0.228965	0.182584	0.105691	-0.0468441	-0.126948	-0.155041	-0.123285	-0.06252	0.0358535	0.154011	0.301067	0.50059	0.704888	0.853087	0.881912	0.765159	0.585006	0.410938	0.236716	0.115783	-0.00968492	-0.0570832	-0.0488026	0.00354438	0.0797907	0.117615	0.0993637	0.137051	0.212683	0.271868	0.311636	0.282168	0.181919	0.0892067	-0.00350369	-0.0528423	-0.181064	-0.311948	-0.381561	-0.318931	-0.134002	0.0539211	0.198019	0.243839	0.231871	0.154338	-0.00016295	-0.131555	-0.225343	-0.280755
1.27677	1.14009	0.942476	0.747234	0.579416	0.416028	0.298697	0.176966	0.13098	0.139014	0.189802	0.263777	0.300474	0.282767	0.319332	0.392711	0.450132	0.488716	0.460126	0.362863	0.272912	0.182963	0.135094	0.0106922	-0.116293	-0.183833	-0.123069	0.056352	0.238678	0.378484	0.422938	0.411327	0.336104	0.186205	0.0587259	-0.0322685	-0.08603	-0.144435	-0.214189	-0.288564	-0.355193	-0.387077	-0.401817	-0.404723	-0.454577	-0.497406	-0.521894	-0.546041	-0.620323	-0.752799
1.06015	0.88588	0.725059	0.585687	0.43675	0.327407	0.203168	0.156234	0.164433	0.216268	0.291767	0.329221	0.311149	0.348467	0.423358	0.481963	0.521343	0.492163	0.392895	0.301091	0.209289	0.160433	0.0334673	-0.0961352	-0.165067	-0.103051	0.0800681	0.266151	0.408838	0.454209	0.442358	0.365585	0.212597	0.0824908	-0.0103788	-0.0652481	-0.124856	-0.196049	-0.271956	-0.339958	-0.372499	-0.387543	-0.390508	-0.44139	-0.485102	-0.510094	-0.534739	-0.610552	-0.745757	-0.913734
0.540045	0.480913	0.372084	0.289887	0.211806	0.167091	0.0461962	-0.0772095	-0.142845	-0.0837942	0.0905687	0.267754	0.403619	0.44682	0.435536	0.362434	0.21676	0.0928757	0.00444657	-0.0477992	-0.104557	-0.172345	-0.244623	-0.309374	-0.340359	-0.354683	-0.357507	-0.405957	-0.447578	-0.471375	-0.494842	-0.56703	-0.69577	-0.855715	-0.956856	-0.975753	-0.88637	-0.674241	-0.469938	-0.309643	-0.202702	-0.0770906	0.0310636	0.151287	0.234131	0.21096	0.135538	0.00588604	-0.0749942	-0.0868172
0.0263366	0.0209933	0.011851	0.00343383	-0.0343855	-0.103011	-0.182082	-0.252919	-0.286816	-0.302487	-0.305576	-0.358579	-0.404113	-0.430147	-0.455819	-0.534792	-0.675633	-0.850611	-0.961259	-0.981931	-0.884148	-0.65208	-0.428574	-0.253213	-0.13622	0.00119714	0.119517	0.25104	0.341671	0.316323	0.233811	0.0919728	0.00349055	-0.00944376	0.11796	0.312087	0.547703	0.769811	0.881205	0.955613	0.93436	0.813881	0.641539	0.445656	0.274808	0.14726	0.0614979	-0.0203533	-0.0892169	-0.160721
-0.277625	-0.272899	-0.285131	-0.342132	-0.393654	-0.42123	-0.446753	-0.525266	-0.665288	-0.839248	-0.949252	-0.969804	-0.87259	-0.641872	-0.419667	-0.245326	-0.129013	0.00760471	0.125236	0.255994	0.346098	0.320897	0.238865	0.0978523	0.00988478	-0.00297429	0.123689	0.316686	0.550932	0.771747	0.882493	0.956468	0.935339	0.81556	0.644221	0.449477	0.279624	0.152818	0.0675546	-0.0138203	-0.0822833	-0.153372	-0.219789	-0.23952	-0.162456	0.0290988	0.206152	0.265975	0.270961	0.249143
-0.130308	-0.216309	-0.320068	-0.392963	-0.428455	-0.457326	-0.536197	-0.676858	-0.851613	-0.962119	-0.982764	-0.885106	-0.653335	-0.430116	-0.254979	-0.138136	-0.000894128	0.117274	0.248629	0.339144	0.313828	0.231422	0.0897654	0.00139635	-0.0115214	0.11572	0.309598	0.544913	0.766736	0.877987	0.9523	0.931075	0.810749	0.638628	0.442996	0.272367	0.144982	0.0593294	-0.0224169	-0.0911925	-0.162605	-0.229326	-0.249146	-0.171731	0.0206981	0.198559	0.258655	0.263664	0.241747	0.267538
0.313189	0.287915	0.175143	0.0559301	-0.0879941	-0.177036	-0.189269	-0.0687746	0.114823	0.33766	0.547721	0.653073	0.723446	0.703346	0.589401	0.426406	0.241147	0.0795661	-0.0410642	-0.122175	-0.199586	-0.264715	-0.332341	-0.395524	-0.414293	-0.340983	-0.158758	0.00967236	0.066582	0.071325	0.0505701	0.0749938	0.147846	0.270488	0.32325	0.263261	0.0846422	-0.177516	-0.411498	-0.636945	-0.789386	-0.876473	-0.875465	-0.717721	-0.440395	-0.112297	0.141426	0.285207	0.27367	0.153993
-0.0203309	-0.0683546	-0.0940847	-0.143458	-0.209051	-0.275115	-0.347215	-0.368634	-0.284977	-0.0770321	0.11517	0.180112	0.185524	0.16184	0.189711	0.272846	0.412797	0.473006	0.40455	0.200721	-0.0984386	-0.365444	-0.62271	-0.796667	-0.896044	-0.894895	-0.714887	-0.398419	-0.0240138	0.265519	0.429593	0.416427	0.27986	0.0944775	-0.165594	-0.387337	-0.48326	-0.456905	-0.296281	-0.0194163	0.287853	0.542725	0.681054	0.618289	0.41149	0.15607	-0.0750973	-0.180776	-0.220219	-0.191844
-0.68832	-0.606758	-0.556905	-0.547546	-0.602239	-0.639947	-0.716535	-0.772483	-0.831013	-0.891264	-0.897084	-0.818785	-0.664825	-0.430048	-0.182122	0.0232765	0.235627	0.435948	0.653941	0.844172	0.921724	0.879396	0.694713	0.43708	0.25432	0.225503	0.336577	0.500763	0.651684	0.776297	0.844481	0.902751	0.87504	0.776346	0.548662	0.2596	-0.0265674	-0.26271	-0.384851	-0.415173	-0.325649	-0.165188	0.0325013	0.210453	0.322826	0.330278	0.21355	0.0862269	-0.000871044	0.0714497
-0.691535	-0.688288	-0.740925	-0.776362	-0.825054	-0.882748	-0.888557	-0.810404	-0.656731	-0.422392	-0.174927	0.0300882	0.242043	0.441991	0.659577	0.849454	0.926862	0.884613	0.700273	0.44312	0.260701	0.231938	0.342805	0.506685	0.657325	0.781705	0.849762	0.907924	0.880264	0.781754	0.554494	0.265972	-0.0196628	-0.255366	-0.377278	-0.407544	-0.318187	-0.158025	0.0392958	0.216916	0.32908	0.336517	0.220007	0.0929213	0.00598565	0.0781716	0.236971	0.348185	0.316497	0.151468
1.03889	1.00496	0.894111	0.672713	0.402846	0.213297	0.182886	0.300104	0.473373	0.632642	0.764148	0.836104	0.897598	0.868353	0.7642	0.523921	0.218869	-0.0831286	-0.332334	-0.461231	-0.493231	-0.398755	-0.229417	-0.0207924	0.167003	0.285593	0.293456	0.170271	0.0359052	-0.0560108	0.0203106	0.188207	0.305793	0.27229	0.0978064	-0.195981	-0.465438	-0.581333	-0.550842	-0.479964	-0.475285	-0.537407	-0.59213	-0.634275	-0.656186	-0.595056	-0.475334	-0.329299	-0.169849	-0.0504748
-0.293266	-0.147625	0.03897	0.250266	0.464818	0.657798	0.776736	0.784622	0.661076	0.526316	0.434131	0.510676	0.679065	0.796995	0.763394	0.588399	0.29375	0.0235034	-0.0927314	-0.0621503	0.00893547	0.0136275	-0.0486766	-0.10356	-0.145828	-0.167803	-0.106494	0.0135789	0.160042	0.319959	0.439683	0.460114	0.349771	0.171006	0.029607	-0.0171484	0.0383532	0.0942289	0.109553	0.080312	0.0380423	-0.0189116	-0.0978472	-0.167334	-0.208755	-0.28242	-0.389037	-0.492064	-0.572122	-0.517584
0.929297	0.723377	0.592353	0.526422	0.611233	0.779462	0.892273	0.860131	0.692732	0.410873	0.152357	0.0411676	0.0704213	0.138421	0.14291	0.0833101	0.0308091	-0.00962441	-0.0306454	0.0280025	0.142863	0.282968	0.435944	0.550472	0.570016	0.464462	0.293457	0.158196	0.11347	0.166562	0.220013	0.234671	0.2067	0.166265	0.111783	0.0362738	-0.0301963	-0.06982	-0.140287	-0.242276	-0.340831	-0.417414	-0.365243	-0.25879	-0.209709	-0.22002	-0.260656	-0.312606	-0.312291	-0.350815
0.241712	0.274627	0.260999	0.203164	0.143502	0.102187	0.0275458	-0.0804852	-0.184878	-0.265998	-0.210736	-0.0979776	-0.0459883	-0.0569102	-0.0999534	-0.154981	-0.154648	-0.195453	-0.315714	-0.500057	-0.75226	-0.962787	-1.03657	-0.952048	-0.773833	-0.549133	-0.370307	-0.20148	-0.0464818	0.106999	0.240336	0.305319	0.275016	0.207495	0.132179	0.054598	-0.0721027	-0.230094	-0.372112	-0.396801	-0.228294	0.040633	0.327108	0.533146	0.668671	0.729379	0.758788	0.798418	0.874997	0.965249
-0.486533	-0.43543	-0.343237	-0.249896	-0.127202	0.012149	0.16871	0.304723	0.371009	0.340098	0.271222	0.194395	0.115257	-0.013986	-0.175148	-0.320016	-0.3452	-0.173312	0.101012	0.393236	0.603409	0.741654	0.803579	0.833578	0.874004	0.95212	1.04418	1.01116	0.881271	0.717796	0.559565	0.460555	0.355771	0.165179	-0.146828	-0.532093	-0.87242	-1.11556	-1.21715	-1.14022	-0.91591	-0.626252	-0.330534	-0.0980705	0.00965801	0.00374366	-0.0838636	-0.15335	-0.192554	-0.18457
-1.07314	-1.16866	-1.25978	-1.35717	-1.38524	-1.27717	-1.04303	-0.740687	-0.432019	-0.189375	-0.0769286	-0.0831019	-0.174546	-0.247075	-0.287996	-0.279662	-0.241208	-0.203612	-0.170376	-0.218691	-0.294713	-0.421624	-0.511655	-0.416208	-0.182599	0.0639462	0.199657	0.219238	0.130405	-0.000703216	-0.12752	-0.204614	-0.245837	-0.220593	-0.134338	0.051034	0.27319	0.421505	0.455216	0.384838	0.236703	0.119427	0.0829775	0.14089	0.282662	0.469873	0.657137	0.845621	1.02065	1.10069
-0.728068	-0.695538	-0.658605	-0.630258	-0.601958	-0.658191	-0.741533	-0.880663	-0.979363	-0.874726	-0.618624	-0.348341	-0.199563	-0.178096	-0.275483	-0.419215	-0.558242	-0.642759	-0.687951	-0.660277	-0.565716	-0.362496	-0.11895	0.0436451	0.0806022	0.00344742	-0.15895	-0.287519	-0.327477	-0.263988	-0.108566	0.0966698	0.301964	0.508597	0.700475	0.788221	0.790866	0.669087	0.491404	0.381974	0.349647	0.380302	0.379064	0.327892	0.202981	0.124955	0.116071	0.17503	0.267852	0.368665
0.135898	0.0767533	-0.0368025	-0.18871	-0.380618	-0.517901	-0.559256	-0.493548	-0.332692	-0.120282	0.0921893	0.306046	0.504631	0.595445	0.598182	0.472145	0.288252	0.174996	0.141539	0.173266	0.171984	0.119023	-0.0102546	-0.0910083	-0.100203	-0.0391823	0.0568849	0.161221	0.279408	0.386568	0.463746	0.512972	0.558376	0.54648	0.517648	0.469662	0.367741	0.295695	0.246705	0.175174	0.109077	-0.00343236	-0.0410592	-0.0077516	0.145227	0.331863	0.382705	0.208831	-0.100036	-0.444615
0.149335	0.0345744	0.00304665	0.0171736	0.0668395	0.0695508	0.0210791	-0.0972414	-0.171151	-0.179566	-0.123717	-0.0357926	0.0597006	0.16787	0.265947	0.336584	0.381637	0.423193	0.412305	0.385916	0.341998	0.248716	0.182776	0.137939	0.07247	0.0119758	-0.0909974	-0.125435	-0.0949506	0.0450616	0.215878	0.262411	0.103275	-0.179413	-0.494786	-0.697757	-0.808097	-0.874074	-0.891848	-0.841364	-0.744298	-0.629932	-0.55873	-0.483951	-0.448927	-0.401381	-0.320245	-0.141452	0.150254	0.471592
-0.32159	-0.118896	0.0316735	0.0761275	0.0451485	-0.0675439	-0.141572	-0.150001	-0.0940624	-0.00599605	0.0896509	0.197995	0.29623	0.36698	0.412106	0.453728	0.442823	0.416392	0.372403	0.278971	0.212925	0.168015	0.102441	0.0418492	-0.0612898	-0.095783	-0.0652493	0.0749883	0.24608	0.292688	0.133295	-0.149847	-0.465728	-0.669026	-0.779544	-0.845628	-0.86343	-0.812865	-0.715643	-0.601093	-0.529776	-0.454876	-0.419796	-0.372174	-0.290907	-0.111826	0.18035	0.502206	0.793362	1.01137
0.365945	0.306713	0.198912	0.082071	-0.0701444	-0.161379	-0.169992	-0.112827	-0.0228304	0.0749133	0.185632	0.286021	0.358322	0.404437	0.446972	0.435828	0.408817	0.363864	0.268384	0.20089	0.154996	0.0879837	0.0260637	-0.0793364	-0.114586	-0.0833827	0.0599293	0.234772	0.282402	0.119514	-0.169835	-0.492641	-0.700396	-0.813337	-0.880869	-0.899062	-0.847388	-0.748035	-0.630973	-0.558093	-0.481551	-0.445702	-0.397035	-0.313987	-0.13098	0.167601	0.496513	0.794051	1.01684	1.04654
-0.587959	-0.662257	-0.708042	-0.720361	-0.610064	-0.387851	-0.0851719	0.261161	0.525588	0.646444	0.617393	0.480638	0.273342	0.0813119	-0.024855	-0.129623	-0.257345	-0.464768	-0.630424	-0.648232	-0.523073	-0.26232	0.0607288	0.333682	0.544758	0.65506	0.635523	0.54774	0.391841	0.206251	0.0193319	-0.211195	-0.493978	-0.726329	-0.818651	-0.723473	-0.530786	-0.344553	-0.189548	-0.139817	-0.0962298	-0.00501447	0.154204	0.379937	0.618689	0.793104	0.821167	0.69736	0.435963	0.171541
0.217126	-0.022767	-0.231031	-0.348483	-0.376147	-0.326189	-0.244167	-0.172283	-0.101461	-0.0320552	-0.00904995	-0.0229508	-0.109417	-0.213095	-0.296008	-0.289313	-0.227165	-0.101829	0.0804475	0.312694	0.526703	0.692253	0.747748	0.67949	0.563719	0.48474	0.442705	0.453571	0.395864	0.239454	-0.0623101	-0.454018	-0.76925	-0.93013	-0.829304	-0.50793	-0.120496	0.115774	0.103747	-0.0545324	-0.211427	-0.251541	-0.104903	0.138937	0.30093	0.268619	0.120449	-0.0642317	-0.210715	-0.317943
-1.09268	-0.915917	-0.623841	-0.243954	0.128263	0.349383	0.33842	0.194143	0.0511281	0.0145629	0.148229	0.370497	0.518159	0.488706	0.353645	0.185302	0.0517776	-0.0459646	-0.0654813	-0.0337729	0.00165048	0.0549155	0.12364	0.254748	0.453882	0.651225	0.736232	0.731931	0.693187	0.652657	0.5971	0.546682	0.505911	0.418683	0.247451	0.0115863	-0.240692	-0.447764	-0.537962	-0.506209	-0.377943	-0.217032	-0.040134	0.101356	0.200222	0.209369	0.176216	0.139591	0.184303	0.246497
0.430765	0.648185	0.813423	0.860222	0.830178	0.779425	0.735057	0.674239	0.619047	0.574415	0.478927	0.29148	0.0332802	-0.242887	-0.469568	-0.568307	-0.533547	-0.393136	-0.216988	-0.0233378	0.13155	0.239778	0.249792	0.213499	0.173407	0.222352	0.290436	0.242238	0.0775263	-0.182772	-0.485829	-0.723337	-0.86201	-0.925771	-0.844072	-0.696135	-0.495648	-0.351086	-0.309451	-0.32558	-0.354058	-0.313702	-0.142599	0.114206	0.377462	0.512781	0.511896	0.364238	0.169678	0.0915147
0.427016	0.224697	-0.00618509	-0.249434	-0.450582	-0.536367	-0.501954	-0.362944	-0.188553	0.0031645	0.156507	0.263655	0.273569	0.237639	0.197946	0.246403	0.313808	0.26609	0.103022	-0.154679	-0.454712	-0.68985	-0.82714	-0.890264	-0.809381	-0.66292	-0.464433	-0.321314	-0.280094	-0.296062	-0.324256	-0.284303	-0.114907	0.139336	0.399965	0.533934	0.533058	0.386873	0.194255	0.116871	0.156074	0.248335	0.289793	0.206347	-0.00869046	-0.265598	-0.47315	-0.562488	-0.53994	-0.488524
0.230522	0.0828748	-0.0251496	-0.0909469	-0.059909	-0.0063879	-0.0468812	-0.185261	-0.403947	-0.658556	-0.858095	-0.974599	-1.02817	-0.959529	-0.835241	-0.666805	-0.545354	-0.510375	-0.523925	-0.54785	-0.513946	-0.370196	-0.154445	0.0667257	0.180412	0.179668	0.0556154	-0.107841	-0.173509	-0.140241	-0.0619486	-0.0267673	-0.0975798	-0.280061	-0.498073	-0.674202	-0.750015	-0.73088	-0.687249	-0.639511	-0.553531	-0.405742	-0.201568	0.0101799	0.178442	0.273536	0.373591	0.565969	0.830812	1.10219
0.193318	0.0110208	-0.212798	-0.415965	-0.486364	-0.448343	-0.360823	-0.321495	-0.400654	-0.604642	-0.84835	-1.04524	-1.12999	-1.1086	-1.05982	-1.00646	-0.910344	-0.745136	-0.516898	-0.280193	-0.0920999	0.0142018	0.12605	0.341101	0.637159	0.940518	1.11463	1.13497	1.02106	0.868862	0.726085	0.616375	0.6084	0.714384	0.851027	0.911656	0.847996	0.61243	0.293719	0.0159136	-0.146154	-0.128951	0.0160687	0.158855	0.221008	0.153166	0.00701418	-0.173157	-0.322173	-0.368865
-0.547638	-0.371306	-0.209145	-0.0774317	-0.000947705	0.101794	0.32779	0.638915	0.957714	1.14068	1.16207	1.04236	0.882411	0.732367	0.617073	0.608692	0.720071	0.863668	0.927383	0.860483	0.612928	0.277996	-0.0139481	-0.184264	-0.166186	-0.0137852	0.136268	0.201584	0.13029	-0.0233005	-0.212641	-0.369242	-0.41831	-0.385688	-0.328624	-0.273988	-0.157491	-0.000535677	0.129451	0.196484	0.207417	0.145406	0.0953261	0.0541042	0.0255109	-0.0454476	-0.132031	-0.225051	-0.30302	-0.352535
0.246471	0.46545	0.673481	0.81723	0.890749	0.899922	0.836299	0.784919	0.742626	0.71329	0.640488	0.551655	0.456219	0.376225	0.325423	0.297111	0.288185	0.205477	0.0878446	-0.0829167	-0.281028	-0.432275	-0.452001	-0.352777	-0.204475	-0.055855	0.00870078	0.0291214	-0.053902	-0.143606	-0.188589	-0.190693	-0.146998	-0.108421	-0.101017	-0.110914	-0.0826573	0.0406575	0.188991	0.283545	0.330325	0.239663	0.0440551	-0.289865	-0.602724	-0.818201	-0.795224	-0.592172	-0.319935	-0.0564448
0.163361	0.141771	0.110135	0.0719722	0.0432774	0.0575196	0.167222	0.299182	0.383297	0.424914	0.34426	0.170244	-0.126815	-0.405138	-0.596829	-0.576388	-0.395751	-0.153566	0.0808385	0.209126	0.213726	0.143885	0.0430876	-0.0638146	-0.161107	-0.255403	-0.327789	-0.44367	-0.587833	-0.674158	-0.708008	-0.662353	-0.537082	-0.38261	-0.160417	-0.0215762	-0.069564	-0.21924	-0.417139	-0.500272	-0.346017	-0.0078007	0.421393	0.748024	0.826598	0.700323	0.451939	0.193149	-0.010016	-0.118759
-0.0145454	0.126249	0.260307	0.326035	0.297367	0.223749	0.123122	0.0164012	-0.0807263	-0.174862	-0.247126	-0.362811	-0.506729	-0.592908	-0.626701	-0.581123	-0.456064	-0.301854	-0.0800376	0.0585681	0.0106616	-0.138761	-0.336325	-0.419316	-0.265323	0.0723203	0.500787	0.826864	0.905306	0.779244	0.531281	0.272929	0.0701087	-0.0384499	-0.0354962	0.043078	0.12634	0.239537	0.33665	0.403299	0.449544	0.442234	0.382198	0.251635	0.102932	-0.0148063	-0.0964887	-0.122185	-0.113182	-0.110029
-0.307363	0.176779	0.616021	0.900432	0.948123	0.787364	0.510594	0.222227	-0.00415633	-0.125327	-0.12203	-0.0343274	0.0586072	0.184955	0.293351	0.367743	0.419361	0.411201	0.34419	0.198459	0.0324803	-0.0989365	-0.190109	-0.21879	-0.208741	-0.205222	-0.164636	-0.0519028	-0.00420971	0.010987	-0.0926775	-0.214207	-0.33477	-0.414068	-0.455327	-0.497797	-0.498799	-0.433597	-0.326432	-0.193846	-0.0724215	0.0550885	0.103122	0.117555	0.124531	0.154216	0.201498	0.270358	0.345609	0.345478
0.308899	0.147783	0.0122316	-0.180728	-0.342925	-0.483195	-0.565373	-0.608129	-0.652141	-0.653179	-0.58561	-0.474555	-0.337156	-0.211324	-0.0791857	-0.0294084	-0.0144512	-0.00722266	0.0235397	0.0725383	0.143898	0.221881	0.221745	0.138664	-0.0283514	-0.164507	-0.290004	-0.36935	-0.406203	-0.433749	-0.436016	-0.400522	-0.403353	-0.398026	-0.343071	-0.247741	-0.087737	0.112244	0.32564	0.480998	0.511542	0.413043	0.293449	0.287349	0.433835	0.701893	0.925736	1.07304	1.06761	0.91836
-0.0134376	-0.169483	-0.331903	-0.449121	-0.55181	-0.618269	-0.652816	-0.678637	-0.680763	-0.64749	-0.650144	-0.645151	-0.593634	-0.504271	-0.35428	-0.166815	0.0332262	0.178861	0.207494	0.115159	0.00305025	-0.00266853	0.13465	0.385932	0.595766	0.733849	0.728763	0.588852	0.361801	0.092609	-0.216675	-0.516894	-0.709415	-0.755282	-0.628076	-0.400018	-0.12917	0.093471	0.27391	0.421565	0.600938	0.787067	0.924291	1.0808	1.16772	1.2014	1.16664	1.09443	1.0006	0.865249
-0.0364577	-0.108075	-0.278534	-0.492295	-0.644787	-0.67409	-0.542677	-0.307076	-0.0272709	0.202734	0.38914	0.541679	0.726984	0.919269	1.06103	1.22271	1.31251	1.34731	1.31139	1.2368	1.13986	1.00004	0.847243	0.63884	0.370645	0.0493607	-0.272846	-0.551524	-0.719122	-0.790272	-0.771398	-0.657087	-0.443476	-0.172941	0.051106	0.152172	0.0839636	-0.113749	-0.300895	-0.433333	-0.483941	-0.495818	-0.480775	-0.466668	-0.424329	-0.304031	-0.106644	0.118331	0.298523	0.324707
0.457826	0.615626	0.720001	0.740808	0.627835	0.406194	0.209842	0.0708885	0.0177905	0.0053288	0.0211126	0.0359133	0.0803356	0.206551	0.413649	0.649692	0.838748	0.866221	0.742532	0.51908	0.324555	0.156134	0.0104618	-0.130464	-0.208681	-0.23362	-0.169169	-0.0337317	0.0753295	0.148396	0.153981	0.0808233	-0.0414706	-0.187907	-0.3142	-0.439003	-0.584975	-0.68199	-0.791814	-0.91807	-1.02654	-0.996431	-0.873596	-0.689069	-0.492964	-0.341468	-0.34976	-0.489753	-0.648867	-0.672081
-0.502201	-0.412872	-0.28866	-0.0781858	0.148628	0.363279	0.524359	0.570246	0.55712	0.475931	0.348669	0.254286	0.250348	0.279025	0.381903	0.400835	0.334201	0.196711	0.0651336	-0.0318399	-0.137004	-0.200412	-0.231659	-0.214944	-0.161206	-0.0898334	-0.0198757	0.03957	0.118467	0.232028	0.267295	0.120177	-0.183324	-0.542584	-0.791725	-0.878748	-0.789735	-0.663484	-0.452397	-0.243122	-0.039161	0.139553	0.276518	0.379029	0.397384	0.304792	0.138185	-0.0396446	-0.188579	-0.23802
0.233298	0.37688	0.554189	0.731817	0.82552	0.83266	0.739128	0.618778	0.559316	0.570593	0.684404	0.822249	0.92133	0.962559	1.01301	1.02319	0.997687	0.85702	0.66274	0.462509	0.309937	0.261672	0.321166	0.412636	0.489446	0.512234	0.452855	0.278479	0.0350524	-0.194901	-0.306143	-0.339155	-0.349747	-0.344583	-0.301503	-0.213434	-0.0914375	0.0215655	0.0205264	-0.139436	-0.433817	-0.779875	-1.03964	-1.14268	-1.0956	-0.961542	-0.82727	-0.792743	-0.807131	-0.811767
1.18024	1.0994	1.0483	0.981964	0.867962	0.629258	0.318118	0.024199	-0.117987	-0.160182	-0.17372	-0.167119	-0.112056	0.000510249	0.156443	0.30088	0.299551	0.0950923	-0.281176	-0.723496	-1.05552	-1.18722	-1.12705	-0.955697	-0.784075	-0.739944	-0.758334	-0.764259	-0.644578	-0.496376	-0.385723	-0.40645	-0.517051	-0.62671	-0.651911	-0.568282	-0.424948	-0.266608	-0.144693	-0.0510928	0.00394646	0.0497377	0.0797506	0.113907	0.148982	0.223262	0.36928	0.561415	0.724517	0.854524
-0.8767	-0.760012	-0.678422	-0.70961	-0.769	-0.787994	-0.653101	-0.486062	-0.361345	-0.384706	-0.509365	-0.632962	-0.661366	-0.567108	-0.405556	-0.227091	-0.0896803	0.0158169	0.0778517	0.129463	0.163291	0.201789	0.241321	0.325042	0.48962	0.706175	0.890008	1.03654	1.07482	0.981692	0.801469	0.590154	0.421969	0.348035	0.337826	0.375945	0.370701	0.24672	0.107887	-0.00108245	-0.0721547	-0.0475788	0.0365535	0.113194	0.125529	0.0921117	0.0568285	0.0682116	0.0638682	0.0553687
-1.31238	-1.08374	-0.856033	-0.643313	-0.461047	-0.326567	-0.227423	-0.169125	-0.120622	-0.0888321	-0.0526527	-0.0155013	0.0631775	0.217842	0.421355	0.594115	0.73182	0.767795	0.680277	0.510909	0.312322	0.154266	0.0847852	0.0751911	0.111014	0.106086	-0.0104274	-0.140899	-0.243305	-0.310097	-0.287001	-0.207936	-0.135912	-0.12432	-0.155724	-0.188882	-0.178185	-0.182266	-0.190254	-0.167131	-0.101096	0.0255469	0.162135	0.208291	0.14967	-0.0272628	-0.322348	-0.646823	-0.969096	-1.08235
-0.0777507	-0.0941853	-0.113065	-0.101934	-0.076382	-0.0320458	-0.0366857	-0.146383	-0.269222	-0.365638	-0.428522	-0.406778	-0.332338	-0.264527	-0.253613	-0.28318	-0.314399	-0.304327	-0.30817	-0.31569	-0.29392	-0.231748	-0.112513	0.0160842	0.0595401	0.00434845	-0.162234	-0.440057	-0.745551	-1.04897	-1.1556	-1.01896	-0.665575	-0.235995	0.162988	0.429398	0.553044	0.628645	0.718392	0.873272	1.00244	1.06273	0.996912	0.842696	0.736592	0.662746	0.650982	0.617625	0.520524	0.432231
-0.197176	-0.262761	-0.314489	-0.321675	-0.274859	-0.168984	-0.0491663	-0.00867724	-0.0601008	-0.21531	-0.474165	-0.758802	-1.04151	-1.14086	-1.01354	-0.684287	-0.284035	0.0877076	0.33593	0.451133	0.521573	0.605193	0.749498	0.869849	0.926025	0.864698	0.72101	0.62215	0.553346	0.542386	0.511306	0.420834	0.338569	0.284556	0.273985	0.280456	0.221824	0.0232574	-0.249571	-0.491579	-0.565019	-0.464356	-0.284412	-0.161659	-0.22025	-0.422091	-0.687341	-0.865309	-0.873545	-0.659023
0.661811	0.607807	0.619398	0.693529	0.831254	0.954687	1.01053	0.949567	0.806727	0.708451	0.640053	0.629158	0.598261	0.508324	0.426544	0.372851	0.362341	0.368774	0.310488	0.113095	-0.158123	-0.398702	-0.471709	-0.37164	-0.192758	-0.0707295	-0.128975	-0.329624	-0.593308	-0.770225	-0.778413	-0.565157	-0.209096	0.15691	0.43116	0.54159	0.465312	0.287169	0.186012	0.150281	0.193348	0.22222	0.149851	-0.0379503	-0.286891	-0.53624	-0.670213	-0.69248	-0.692904	-0.687085
0.912455	1.02757	1.0954	1.1056	1.02225	0.869647	0.771402	0.703025	0.692133	0.661247	0.571338	0.489584	0.435907	0.425401	0.431832	0.373565	0.176233	-0.0948987	-0.335402	-0.408385	-0.308348	-0.129523	-0.00753262	-0.0657595	-0.266346	-0.529946	-0.706807	-0.714992	-0.501804	-0.145855	0.220035	0.494198	0.604593	0.52834	0.350252	0.249128	0.213408	0.256461	0.285324	0.212978	0.0252362	-0.223625	-0.472896	-0.606827	-0.629087	-0.62951	-0.623693	-0.644189	-0.699444	-0.729905
0.854567	0.456558	0.0854376	-0.181435	-0.256536	-0.149886	0.0415373	0.172122	0.109793	-0.104924	-0.387095	-0.576416	-0.585177	-0.35697	0.0240547	0.415721	0.709199	0.827371	0.745745	0.555112	0.446863	0.408627	0.454714	0.48561	0.408167	0.207199	-0.0591944	-0.326026	-0.469392	-0.49322	-0.493674	-0.487446	-0.509386	-0.568534	-0.601141	-0.536143	-0.387304	-0.25728	-0.202841	-0.208658	-0.225223	-0.280751	-0.33254	-0.358318	-0.340317	-0.273978	-0.124524	0.0156513	0.143429	0.179386
-0.0188614	-0.0567197	-0.116154	-0.189075	-0.239763	-0.190255	-0.0411084	0.123932	0.268181	0.329696	0.342863	0.289301	0.246564	0.199324	0.206138	0.260294	0.353346	0.48399	0.652318	0.860124	0.973103	0.978132	0.811062	0.611851	0.481785	0.497752	0.614012	0.717122	0.742887	0.641632	0.540661	0.523618	0.589319	0.663814	0.666354	0.554758	0.391877	0.278693	0.170059	0.109743	0.0650124	-0.0269293	-0.177599	-0.330386	-0.454892	-0.554047	-0.64239	-0.707254	-0.706518	-0.673883
0.730549	0.960779	1.15173	1.27886	1.29561	1.18384	1.01736	0.901679	0.790647	0.728999	0.683281	0.58931	0.435314	0.279154	0.1519	0.0505565	-0.039737	-0.106033	-0.10528	-0.0719252	-0.0597996	-0.112524	-0.232483	-0.395884	-0.53669	-0.58703	-0.566316	-0.490979	-0.451718	-0.431719	-0.460925	-0.48711	-0.55155	-0.624632	-0.684134	-0.79488	-0.895458	-0.956632	-0.909929	-0.777539	-0.55389	-0.28545	-0.0147516	0.200475	0.381309	0.54597	0.60945	0.581386	0.459698	0.269183
-0.0991592	-0.167028	-0.203169	-0.275037	-0.355212	-0.421467	-0.544898	-0.656995	-0.725176	-0.673124	-0.52557	-0.276306	0.0228797	0.324583	0.564461	0.766006	0.949526	1.02028	0.988999	0.853373	0.641038	0.462256	0.268799	0.0848629	-0.0404448	-0.139544	-0.194657	-0.207097	-0.174058	-0.107558	0.00512358	0.044273	0.0336517	-0.00742987	-0.0354728	-0.0879382	-0.18	-0.30204	-0.363085	-0.310982	-0.122067	0.116447	0.319984	0.454976	0.411697	0.300227	0.139587	0.0632235	0.0782029	0.133839
0.30503	0.217426	0.163223	0.144333	0.103111	0.031696	-0.0707374	-0.121975	-0.0782429	0.0803216	0.280516	0.451353	0.564657	0.528332	0.43477	0.299938	0.235843	0.248416	0.295114	0.295632	0.271098	0.208515	0.110348	-0.0167496	-0.148669	-0.206723	-0.220554	-0.150923	-0.0429587	0.0892609	0.283084	0.52462	0.708747	0.81887	0.832593	0.71231	0.53469	0.344682	0.148121	-0.035158	-0.183968	-0.298618	-0.371917	-0.38547	-0.324205	-0.155123	0.00162258	0.0719568	-0.014818	-0.17372
0.745367	0.724792	0.601122	0.473014	0.331248	0.265086	0.277728	0.324683	0.325204	0.300535	0.237607	0.1389	0.011103	-0.121543	-0.179916	-0.193824	-0.123809	-0.0152504	0.117697	0.312587	0.555453	0.740593	0.851323	0.865121	0.744176	0.565578	0.374525	0.176881	-0.00740678	-0.157036	-0.272317	-0.34602	-0.359647	-0.298045	-0.128032	0.0295763	0.100298	0.0130452	-0.146732	-0.242945	-0.257	-0.231203	-0.23262	-0.372261	-0.657654	-0.985524	-1.20979	-1.18286	-0.915648	-0.571959
-0.331251	-0.269853	-0.219977	-0.1197	0.000631585	0.135954	0.338669	0.591287	0.783861	0.899037	0.913389	0.787588	0.601819	0.403094	0.197515	0.00582668	-0.149811	-0.269721	-0.346383	-0.360557	-0.296481	-0.119642	0.0442947	0.117856	0.0270999	-0.139093	-0.239169	-0.253789	-0.226956	-0.22843	-0.373678	-0.67053	-1.01157	-1.24484	-1.21683	-0.938884	-0.581394	-0.279076	-0.0990936	-0.0109782	0.022664	0.05415	0.0462939	-0.010602	-0.101125	-0.14309	-0.0634061	0.0893139	0.221036	0.299243
0.428	0.450372	0.398888	0.223094	0.0158912	-0.0982242	-0.113805	-0.085208	-0.0867791	-0.24158	-0.557956	-0.921422	-1.17004	-1.14019	-0.84396	-0.462958	-0.140756	0.051064	0.144975	0.18083	0.214387	0.206014	0.145376	0.048899	0.00417391	0.0890987	0.251863	0.392249	0.4756	0.474605	0.440685	0.376464	0.304814	0.260239	0.299097	0.409883	0.59911	0.731535	0.650152	0.34293	-0.108276	-0.540183	-0.786075	-0.804522	-0.610074	-0.323934	-0.08009	0.0921043	0.171808	0.190078
-0.836655	-1.02546	-1.06768	-0.954924	-0.666097	-0.310008	-0.00924135	0.203149	0.301459	0.323994	0.299017	0.195306	0.0873664	0.0303585	0.0747634	0.122365	0.149077	0.139429	0.151089	0.17349	0.221872	0.302514	0.316942	0.212521	0.0273558	-0.181606	-0.318199	-0.30766	-0.176646	-0.0285886	0.0993143	0.21627	0.328077	0.431245	0.523709	0.563495	0.487085	0.332821	0.18529	0.112108	0.090169	0.0853829	0.0641401	-0.0820893	-0.281607	-0.470147	-0.510372	-0.441928	-0.288842	-0.170631
0.318869	0.286645	0.2279	0.0986165	-0.0193742	-0.0858495	-0.0382975	0.0126777	0.0412828	0.0309517	0.0434373	0.0674258	0.119237	0.205595	0.221045	0.109224	-0.089065	-0.312837	-0.45911	-0.447824	-0.307525	-0.148974	-0.0120066	0.113238	0.23297	0.343449	0.442467	0.485073	0.403247	0.238049	0.0800624	0.0016937	-0.0218	-0.0269253	-0.0496737	-0.206267	-0.419925	-0.621828	-0.664904	-0.591609	-0.427673	-0.301084	-0.135428	0.00492917	0.175883	0.357294	0.432495	0.362052	0.181966	-0.0287918
0.112424	0.0235908	-0.020789	0.00230464	0.0692948	0.15747	0.250891	0.291089	0.213888	0.0580266	-0.0910317	-0.164971	-0.187137	-0.191973	-0.213436	-0.361179	-0.562762	-0.753254	-0.793895	-0.724743	-0.570072	-0.450637	-0.294343	-0.161919	-0.000626249	0.170532	0.241483	0.175021	0.00511278	-0.193734	-0.376049	-0.511639	-0.543567	-0.406904	-0.209323	-0.0115702	0.139229	0.172781	0.101585	-0.0328875	-0.149117	-0.191865	-0.186083	-0.178691	-0.121519	0.0373144	0.229023	0.462929	0.648841	0.733707
-0.208562	-0.0242999	0.13022	0.188417	0.121819	-0.0282553	-0.205015	-0.36708	-0.487609	-0.515991	-0.394508	-0.218872	-0.0430852	0.090964	0.120789	0.0575017	-0.0620347	-0.165354	-0.203354	-0.198214	-0.191644	-0.140821	0.000369563	0.170785	0.378709	0.543971	0.619411	0.638227	0.57628	0.472215	0.329189	0.233468	0.203493	0.230094	0.217324	0.208948	0.216477	0.210814	0.224503	0.135302	0.00673191	-0.12698	-0.209126	-0.275519	-0.315997	-0.340124	-0.316626	-0.313806	-0.368942	-0.399262
-0.171926	0.00111933	0.149286	0.261896	0.289414	0.293063	0.300818	0.294985	0.309086	0.217201	0.0847629	-0.0529722	-0.137589	-0.20598	-0.247676	-0.272529	-0.248324	-0.245419	-0.302214	-0.333446	-0.339692	-0.167605	0.132672	0.486194	0.73799	0.779932	0.568347	0.235795	-0.0826178	-0.279818	-0.29317	-0.20274	-0.0933555	-0.0490219	-0.123269	-0.272459	-0.361324	-0.320007	-0.122582	0.192076	0.460408	0.6	0.50582	0.279097	0.00204908	-0.26851	-0.492768	-0.660764	-0.762208	-0.725976
0.533567	0.562288	0.518493	0.324072	0.0653831	-0.218106	-0.485813	-0.707706	-0.873932	-0.974306	-0.938457	-0.732904	-0.437597	-0.119693	0.0276327	-0.0193328	-0.182703	-0.291956	-0.247354	-0.0528168	0.217626	0.452068	0.594894	0.623643	0.56925	0.415382	0.2381	0.111545	-0.0205087	-0.144632	-0.220002	-0.289552	-0.408301	-0.558505	-0.681583	-0.748441	-0.683857	-0.506109	-0.254782	-0.0348734	0.073373	0.0985753	0.121223	0.146572	0.202962	0.26089	0.25698	0.265685	0.306698	0.384019
-0.879074	-0.636037	-0.354372	-0.040319	0.282766	0.534915	0.684152	0.714191	0.657357	0.496582	0.311342	0.179107	0.041125	-0.0885705	-0.167323	-0.239995	-0.364074	-0.521021	-0.649624	-0.719483	-0.652	-0.466273	-0.203664	0.0261154	0.139221	0.165554	0.189219	0.215706	0.274627	0.335155	0.331069	0.340165	0.38302	0.463811	0.613421	0.750364	0.838754	0.822727	0.714542	0.483174	0.223533	-0.0199023	-0.177623	-0.179097	-0.164633	-0.185749	-0.264855	-0.341802	-0.461586	-0.554567
0.508525	0.45312	0.27847	0.0686952	-0.137036	-0.279604	-0.281038	-0.266962	-0.287512	-0.364495	-0.439377	-0.555946	-0.646432	-0.670793	-0.653106	-0.59175	-0.537258	-0.49202	-0.469368	-0.398234	-0.308388	-0.170741	-0.0385372	0.0602314	0.0816074	0.0517469	-0.0710109	-0.197246	-0.355814	-0.395327	-0.328723	-0.196411	-0.0652909	0.00569297	0.0242572	-0.0267299	-0.146089	-0.241913	-0.267227	-0.221408	-0.0776575	0.055915	0.175585	0.234451	0.277196	0.365704	0.491419	0.593525	0.661166	0.652599
0.664112	0.358493	0.0858074	-0.141396	-0.288046	-0.289479	-0.2754	-0.295954	-0.372956	-0.447856	-0.564453	-0.654961	-0.679327	-0.661636	-0.600265	-0.54576	-0.500512	-0.477854	-0.406703	-0.316836	-0.179155	-0.0469199	0.0518725	0.0732536	0.043386	-0.0794014	-0.205666	-0.364273	-0.403795	-0.337175	-0.204832	-0.07368	-0.00267903	0.0158896	-0.0351097	-0.154497	-0.250345	-0.275665	-0.229835	-0.0860495	0.0475551	0.167254	0.226135	0.268889	0.357419	0.483164	0.585295	0.652951	0.644382	0.55746
-0.608298	-0.503127	-0.430038	-0.389247	-0.306596	-0.207741	-0.0677979	0.0666108	0.167027	0.188759	0.158401	0.0335955	-0.0947447	-0.255958	-0.29613	-0.228415	-0.0938967	0.0394109	0.111579	0.130453	0.0786151	-0.0427349	-0.140157	-0.165893	-0.119311	0.0268381	0.162639	0.284305	0.344153	0.387611	0.477595	0.605407	0.709216	0.777985	0.769275	0.680924	0.578461	0.501205	0.516001	0.633027	0.777545	0.898581	0.908156	0.743133	0.452099	0.216383	0.0984293	0.0511863	0.00518223	-0.119927
0.203001	0.209272	0.251167	0.349899	0.476694	0.583234	0.649075	0.640736	0.556146	0.458043	0.384076	0.398242	0.510287	0.648655	0.764539	0.773706	0.615707	0.33706	0.111376	-0.00155745	-0.0467897	-0.0908358	-0.21062	-0.424668	-0.684004	-0.922739	-1.08565	-1.12191	-1.09828	-0.986017	-0.868948	-0.758343	-0.607389	-0.451076	-0.268673	-0.098883	0.00566472	0.0251951	0.0667648	0.14633	0.300911	0.489758	0.569052	0.580243	0.489344	0.414402	0.352637	0.289132	0.181847	0.0149993
-0.734369	-0.762919	-0.730748	-0.682526	-0.570127	-0.460437	-0.352589	-0.205396	-0.0529784	0.12488	0.290438	0.392381	0.411424	0.451958	0.529541	0.680269	0.864411	0.941729	0.952641	0.864007	0.790932	0.730707	0.668784	0.564173	0.401483	0.163601	-0.134603	-0.380886	-0.513683	-0.469559	-0.220087	0.148444	0.485039	0.65932	0.629514	0.514738	0.344339	0.234812	0.171847	0.176162	0.169031	0.110056	0.056462	-0.0109822	-0.0181762	-0.0120925	-0.00397106	-0.0545268	-0.132116	-0.252441
-0.63096	-0.79807	-0.92048	-1.03145	-1.10755	-1.09315	-0.975792	-0.712859	-0.282773	0.196023	0.554624	0.660833	0.493345	0.182616	-0.11997	-0.3215	-0.358733	-0.245372	-0.038815	0.141805	0.297561	0.40917	0.497587	0.598108	0.671163	0.707067	0.720946	0.730128	0.708427	0.732969	0.730812	0.706305	0.589671	0.455038	0.312763	0.199911	0.148399	0.0916189	0.0102317	-0.0904974	-0.200674	-0.259469	-0.212697	-0.0978825	0.0608985	0.226938	0.313617	0.249157	0.0592256	-0.180189
0.676344	0.59629	0.589661	0.57023	0.533302	0.40596	0.26425	0.114494	-0.0042895	-0.0585106	-0.118275	-0.203941	-0.309966	-0.425935	-0.487821	-0.43859	-0.317739	-0.150611	0.0241581	0.115394	0.0475454	-0.152372	-0.404373	-0.617136	-0.728058	-0.754526	-0.747411	-0.673489	-0.598596	-0.500204	-0.354754	-0.219127	-0.197681	-0.254394	-0.339154	-0.397972	-0.425524	-0.426364	-0.449671	-0.476262	-0.474683	-0.334419	-0.111363	0.121728	0.311301	0.496767	0.624941	0.719563	0.693965	0.59753
[truncated: 7,741 more rows]
[truncated: 151 more columns]

## Sheet: F-Rewarded
0.324903	0.151394	-0.0690688	-0.382927	-0.729631	-1.08859	-1.37423	-1.53346	-1.61488	-1.63969	-1.66337	-1.58326	-1.37904	-1.17611	-0.995458	-0.882332	-0.788539	-0.733206	-0.741939	-0.818672	-0.937258	-1.07098	-1.11147	-0.997345	-0.866065	-0.77644	-0.780197	-0.838036	-0.861921	-0.858589	-0.794951	-0.638688	-0.468454	-0.314037	-0.166775	-0.111447	-0.0660752	-0.10842	-0.214015	-0.356072	-0.458149	-0.500694	-0.459996	-0.41634	-0.344341	-0.238155	-0.0923514	0.00384472	0.0515968	0.00566336
[truncated: 708 more rows]
[truncated: 91 more columns]

[truncated: 9 more sheets: F-Non-rewarded, G-Air, G-CIE, H-Air, H-CIE, I-Rewarded, I-Non-rewarded, J-Rewarded, J-Non-rewarded]
