# Supplementary material for: Mechanism for differential recruitment of orbitostriatal transmission during actions and outcomes following chronic alcohol exposure
Source: eLife. 2021 Mar 17;10:e67065. doi: 10.7554/eLife.67065 (PMC8016477; doi:10.7554/eLife.67065)
Supplement: Figure 1—source data 1. [file elife-67065-fig1-data1.xlsx]

## Sheet: Figure 1F-M
Training Day	F. Air lever presses													F. CIE lever presses
CRF	6	5	5	5	5	6	5	5	7	4				6	5	5	5	7	8	5	5	6	7	5	3
CRF	15	10	15	15	16	11	8	17	15	16				15	15	15	15	15	16	4	15	13	8	15	15
CRF	4	23	31	31	32	12	31	30	31	30				31	21	30	30	30	30	31	31	32	31	30	30
1	15	272	270	242	322	60	358	451	47	242				46	7	294	288	318	278	213	159	269	273	291	188
2	333	304	276	204	140	30	20	265	30	25				156	5	108	199	356	29	131	79	243	92	302	183
3	410	557	122	230	180	118	254	593	89	236				590	58	533	555	370	277	264	35	108	392	574	323
4	399	517	216	233	406	143	701	568	249	334				135	10	586	660	808	288	126	52	393	229	716	514
5	728	489	461	113	349	164	570	468	403	277				274	18	539	730	555	458	465	35	436	441	686	576
6	473	105	593	172	486	275	705	603	642	568				485	54	379	659	545	729	234	223	578	662	554	538
Training Day	G. Air response rate													G. CIE response rate
CRF	1.06825	0.70588	0.10741	0.33784	0.50167	0.15491	0.45732	0.1827	0.746	0.06667				0.53019	0.29557	0.44978	0.11025	1.07692	0.29091	0.42076	0.12782	0.54217	0.42726	0.30303	0.05
CRF	0.433944	0.166667	0.269461	0.287265	0.766773	0.183333	0.133333	0.310881	0.632911	0.468979				1.31579	0.668151	0.889328	0.711462	0.456853	0.288983	0.066667	0.717131	0.216667	0.133333	0.902708	0.365854
CRF	0.0666667	0.383333	0.85282	0.666428	1.38428	0.2	0.641379	0.83682	0.577999	0.566394				0.74579	0.35	1.45513	1.84049	1.40845	0.773861	0.644491	0.949949	1.91045	0.83935	2.1102	2.12264
1	0.25	5.3649	7.9961	4.0333	6.3365	1	9.8262	8.0945	0.7833	4.0333				0.7667	0.1167	15.406	10.8	15.576	4.6333	2.3667	2.65	7.1543	4.55	8.0535	6.2982
2	5.55	5.8015	4.6	3.4	2.3333	0.5	0.3333	4.4167	0.5	0.4167				2.6	0.0833	1.8	3.3167	5.9333	0.4833	2.1833	1.3167	4.05	1.5333	5.8603	3.05
3	6.8333	10.427	2.0333	3.8333	3	1.9667	4.2333	10.555	1.4833	3.9333				10.258	0.9667	9.6587	9.25	6.1667	4.6167	4.4	0.5833	1.8	6.5333	17.177	5.3833
4	6.65	8.6167	3.6	3.8833	6.7667	2.3833	11.683	12.397	4.15	5.5667				2.25	0.1667	9.7667	14.738	14.736	4.8	2.1	0.8667	6.55	3.8167	27.155	8.5667
5	12.1333	12.139	7.68333	1.88333	5.81667	2.73333	10.5458	7.8	6.71667	4.61667				4.56667	0.34297	8.98333	15.0464	14.0329	7.73867	7.75	0.58333	10.1435	7.35	16.9592	9.6
6	7.88333	1.75	9.88333	2.86667	8.1	4.58333	15.0964	13.2917	11.0817	9.46667				8.08333	0.9	6.31667	22.0524	15.6011	17.5381	3.9	3.71667	18.2815	11.0333	26.2352	18.4986
Training Day	H. Air head entries													H. CIE head entries
CRF5	12	51	297	0	75	28	12	156	3	2				215	167	140	747	128	22	71	24	106	89	0	1
CRF15	101	705	442	223	222	519	567	502	3	13				130	216	212	253	388	595	214	130	717	491	113	327
CRF30	263	489	161	547	266	498	343	161	16	513				181	83	164	134	281	426	245	170	139	248	126	115
1	136	289	387	479	460	425	252	474	554	513				346	207	166	242	138	532	264	458	375	461	364	219
2	138	234	215	369	411	257	232	551	292	172				326	158	223	665	646	350	448	185	201	164	389	615
3	130	289	808	363	166	182	505	289	453	186				375	309	384	361	457	265	449	107	175	139	184	649
4	345	176	426	363	488	265	213	205	439	119				275	672	262	197	194	267	132	136	110	76	104	346
5	61	105	235	433	374	143	154	265	131	223				587	201	254	130	172	309	175	54	142	123	84	426
6	247	137	199	354	242	62	199	113	117	459				243	467	232	117	70	197	218	68	92	149	66	172
Training Day	I. Air reinforcers earned													I. CIE reinforcers earned
CRF	5	5	5	5	5	6	5	5	6	4				5	5	5	5	7	8	5	5	6	7	5	3
CRF	15	10	15	15	16	11	8	17	15	16				15	15	15	15	15	16	4	15	13	8	15	15
CRF	4	23	31	31	31	12	31	30	31	30				31	21	30	30	30	30	31	30	31	31	30	30
1	15	30	30	20	30	5	30	30	7	21				46	1	30	30	30	24	24	20	30	27	30	30
2	23	30	19	16	14	2	3	27	3	3				18	0	6	25	23	6	11	5	19	7	30	19
3	23	30	4	16	9	3	19	30	5	15				30	2	30	26	23	10	16	0	3	18	30	21
4	20	13	11	4	20	9	27	30	16	11				9	2	29	30	30	18	7	1	24	8	30	20
5	26	30	26	8	15	9	30	21	20	15				17	1	23	30	30	30	22	3	30	29	30	25
6	19	6	27	7	29	13	31	30	31	25				20	2	19	30	30	30	12	11	30	29	30	30
	J. Lever press bouts			K. Presses per bout			L. IPI			M. Bout duration
	Air	CIE		Air	CIE		Air	CIE		Air	CIE
	11	103		20	4		1.69096	0.038263		47.8441	4.27196
	17	27		34	3		3.05382	0.200928		125.043	2.76063
	38	30		6	11		8.53332	0.489426		49.8552	10.5099
	84	53		3	3		7.31522	0.278522		19.1319	2.12987
	49	26		6	3		4.82499	0.239616		29.6501	2.53944
	28	24		12	7		3.11507	0.333139		41.6592	4.43991
	37	48		8	4		3.9186	0.188437		54.9708	2.67871
	23	26		6	7		5.24599	0.250534		46.001	2.87119
	47	4		3	3		2.02946	0.7352		10.7067	2.6828
	19	27		4	3		10.1114	0.413683		31.8783	1.78167
	41	66		5	3		3.16928	0.21504		14.6103	1.97009
	13	78		4	3		1.14141	0.305146		7.11048	1.03209
	20	12		11	5		2.68362	0.288752		35.7897	4.78806
	58	67		6	4		2.67298	0.473835		68.3931	2.51896
	41	15		6	6		4.1999	0.097498		25.1733	2.03976
	59	41		4	3		7.15008	0.614374		22.8592	1.88
	48	51		5	3		4.61195	0.575475		38.2514	2.28957
	29	52		10	4		4.77079	0.072337		46.304	1.76122
	39	54		3	5		0.069568	0.163834		1.97019	2.78927
	13	72		17	4		1.81781	0.511296		39.7792	2.87937
	9	37		5	4		3.33304	0.983002		17.9113	5.86934
	17	2		3	3		0.409498	0.50583		3.27674	1.63014
	21	84		8	8		3.96657	0.668818		36.7319	6.23392
	23	68		40	5		1.71618	0.720886		89.6755	5.00104
	36	37		4	4		2.11899	0.285329		8.48251	2.09711
	111	64		16	3		1.91141	0.528352		35.6547	1.34755
	66	52		57	5		1.54539	0.273395		114.312	3.11287
	32	64		3	3		1.71	0.585709		4.03038	1.79397
	24	69		3	5		5.76091	1.0329		13.3812	5.70965
	91	69		3	3		2.59677	0.552941		7.15133	1.91273
	28	63		14	5		2.09016	0.114621		36.5106	1.59739
	85	37		3	5		2.44113	0.11152		8.08937	2.25271
	19	30		11	4		1.47659	0.274415		21.8433	3.01039
	59	113		10	3		2.06114	0.561421		25.3413	2.24044
	76	51		10	6		2.48984	0.835564		28.1715	7.08134
	69	60		11	6		1.29388	0.906007		17.9808	6.11925
	34	66		17	5		1.35292	0.930768		31.0796	4.99692
				33	3		1.48002	0.067808		66.0952	2.02752
				5	5		2.19436	0.100349		11.5914	1.99059
				4	3		2.01109	0.159744		7.33161	2.12989
				15	3		1.57718	0.161798		31.5998	1.87181
				16	10		2.55066	0.94842		47.672	13.2501
				6	4		1.8824	0.256666		12.3778	3.4815
				32	7		1.75425	0.202743		71.1373	3.60027
				8	4		3.12928	0.094217		27.7005	1.79398
				4	6		3.18932	0.738061		11.833	6.88516
				48	3		1.77299	0.354291		122.065	2.53532
				8	13		2.72958	0.339951		24.8497	9.94474
				12	4		2.24451	0.591164		34.4504	4.57918
				8	5		2.33643	1.01269		23.187	5.8489
				13	3		1.59604	0.243667		30.1006	1.31885
				5	3		1.33732	0.096256		7.59788	1.72365
				7	6		2.09641	0.304719		16.5719	3.87059
				3	3		2.2507	0.352224		5.8038	1.7612
				4	10		2.24044	0.414145		11.1407	8.65046
				7	14		2.83795	0.493404		25.4806	19.0622
				8	7		1.94729	0.49081		18.5421	5.9308
				8	3		0.95904	0.102381		11.3702	0.888819
				24	5		1.80558	0.282602		59.038	3.9689
				7	4		1.852	0.034133		23.4203	1.7489
				14	4		1.95624	0.944768		41.4421	5.45158
				7	3		2.05132	0.153626		20.5408	1.70798
				6	4		2.33385	0.244399		16.4737	2.44936
				5	23		1.17041	0.269612		5.64818	17.5098
				5	6		0.944707	0.182684		7.16783	2.14213
				3	3		2.4985	0.407514		6.18066	1.87589
				4	6		0.218428	0.235912		2.21181	2.87122
				6	3		0.655329	0.450541		5.4843	2.03971
				14	6		0.891289	0.639764		19.8199	6.74997
				3	5		0.08391	0.493555		4.0385	4.74296
				3	5		0.141318	0.050173		2.06846	1.54824
				5	4		0.131107	0.806916		4.73078	5.47208
				22	7		1.1484	0.482583		41.8597	5.23043
				4	4		0.6608	0.051861		9.80966	0.942029
				4	16		0.619861	0.618187		8.61352	16.2483
				8	4		0.5289	0.303113		7.27825	2.66641
				7	4		0.589747	0.705873		13.1231	3.02687
				14	3		1.40455	0.13719		43.6823	1.22058
				14	12		0.613412	0.654967		16.9895	16.2114
				4	12		1.4145	0.465779		6.71718	9.21158
				9	4		1.35566	0.259401		19.3284	1.62609
				3	8		0.200774	0.710923		4.78817	8.67093
				8	16		0.522545	0.608347		16.3998	14.5608
				15	13		0.727891	0.397297		20.7579	11.0957
				10	7		1.19643	0.70858		17.7433	6.70084
				7	4		2.13394	1.06492		18.7384	4.37028
				3	3		0.548909	0.163834		4.42762	1.21235
				3	8		0.849843	0.431815		3.887	8.74875
				17	22		1.58971	0.434556		38.2716	19.1522
				3	4		0.626566	0.055983		3.06772	2.08888
				8	9		0.942051	0.352253		13.2133	7.73298
				9	3		0.752074	0.499667		12.3573	1.73251
				7	30		1.18099	0.587522		12.2834	29.2485
				7	6		0.295543	1.03298		5.41053	8.44974
				10	7		1.2761	0.68743		22.0807	8.19172
				3	13		0.299085	0.42017		6.02094	11.6241
				3	26		0.436192	0.473164		3.73135	25.5991
				5	13		0.586762	0.373059		4.70625	11.8288
				6	14		1.59493	0.465361		12.7423	14.2781
				4	9		0.587017	0.573914		6.70895	10.1127
				3	4		1.21242	0.304452		4.46854	1.85549
				9	6		1.58453	0.493962		15.5192	4.56279
				13	5		1.11442	0.927712		25.0789	4.84952
				9	3		1.06643	0.155642		20.8234	12.4719
				17	8		1.52137	5.08459		37.7924	48.1509
				14	3		1.37997	4.76143		31.5542	13.1231
				3	3		0.796698	5.39424		3.70261	13.2419
				10	4		1.12567	6.05369		14.4216	18.9884
				4	3		0.271667	8.24497		3.73948	17.1166
				9	8		1.02397	5.69339		14.442	43.0639
				6	8		1.35164	3.07194		10.4076	26.0415
				4	3		1.42261	6.61071		6.81146	14.999
				3	3		0.933901	4.20444		2.88758	11.6691
				13	3		1.63394	8.62383		30.5798	19.0417
				11	4		0.910918	5.24407		19.5822	17.0879
				4	25		1.54408	3.96231		5.69729	105.853
				6	7		1.85215	3.65282		13.5409	26.1806
				9	3		1.67163	2.89169		23.2317	10.0348
				10	5		1.01032	5.03384		16.6619	22.1136
				13	6		1.23185	3.86649		26.4551	21.8023
				10	5		1.60242	4.83414		21.2412	22.8631
				12	8		0.913008	3.87411		26.0006	30.6534
				6	18		1.52941	4.75263		23.6823	87.2828
				5	4		2.01821	2.49162		18.7017	8.36381
				10	11		0.860582	5.80301		12.1197	60.205
				6	36		1.66042	2.12563		16.2279	91.0919
				5	17		1.23801	3.90157		9.84417	71.2434
				17	3		0.892893	0.221171		34.2782	2.93262
				16	23		1.37922	2.73064		35.0442	68.5851
				22	11		1.06298	3.18862		41.7737	38.2021
				6	9		1.40077	2.44318		9.85869	23.8215
				9	5		2.01155	4.0723		19.6602	18.4478
				4	4		1.26424	4.83994		5.19354	16.707
				4	3		1.91145	0.315392		7.16781	5.7178
				4	8		0.707251	5.75117		4.19014	48.4213
				11	3		1.09567	0.39008		13.7743	2.24863
				3	12		1.35573	2.81684		3.67812	35.1916
				4	5		0.647164	1.1478		6.87283	7.29052
				13	25		0.735188	3.27483		23.6701	103.281
				3	6		1.05673	4.44402		4.22287	26.2299
				3	8		1.42117	3.82904		5.19754	33.9219
				3	5		2.8139	3.91757		7.47916	19.4881
				3	5		2.22813	2.19028		5.43103	12.5416
				5	20		0.47201	3.6201		8.49064	83.0231
				5	11		2.18922	3.10835		15.294	37.8335
				6	11		0.98955	3.48556		10.9769	40.9381
				3	12		0.415629	3.26887		2.93257	50.4815
				3	5		1.18165	4.19518		9.14203	19.1932
				6	6		0.677445	1.86527		11.9722	11.4111
				3	8		1.42535	3.96887		9.60067	31.5135
				4	3		1.12086	4.09995		6.51233	9.51877
				5	9		2.03053	6.0143		9.37955	55.1057
				3	4		2.65816	4.02485		11.4725	14.9826
				3	15		0.499706	4.15115		2.27717	65.5624
				18	15		1.22537	3.12894		25.7793	54.2333
				8	3		1.42244	0.724947		12.8896	1.85133
				3	3		1.34959	8.22243		3.46912	18.7017
				16	8		1.63643	6.67099		37.2314	50.2316
				8	6		0.890556	4.5677		10.9481	26.7623
				9	11		0.369182	5.39916		14.7124	61.8024
				19	5		1.18325	1.48578		43.4699	7.16365
				25	3		1.12092	3.42006		51.8126	10.1004
				3	5		0.372698	4.39892		6.21759	20.7087
				15	6		2.72724	3.1874		52.386	19.4635
				6	4		2.74912	3.5033		17.2272	14.8107
				26	8		0.911418	2.6623		136.355	22.8508
				10	4		1.74847	2.37696		24.3334	8.56854
				3	4		0.583725	4.37302		2.96536	14.0693
				9	7		2.20867	2.07325		31.6201	14.7779
				22	8		1.46301	2.50315		57.6615	20.4834
				3	16		0.475078	2.12002		3.8624	41.9334
				12	3		2.79189	0.704486		36.2525	1.71208
				5	5		1.60763	0.856035		8.39665	6.18888
				10	4		1.3689	2.28002		18.7795	10.6411
				3	6		2.36127	0.366162		6.65171	6.74179
				30	7		0.644463	1.26489		54.4298	10.7107
				10	3		0.786714	0.92976		13.2009	4.79209
				4	15		2.05207	1.3051		7.3111	24.2024
				4	4		3.25621	3.7395		11.8821	13.889
				6	11		0.904346	1.45977		9.39177	20.381
				4	15		1.66417	2.47976		10.6821	40.6227
				20	10		1.51417	1.19461		66.0458	15.679
				5	4		2.46673	2.44529		12.3695	9.04366
				9	8		1.72382	0.940286		18.1038	12.0378
				5	7		0.210941	1.03351		5.93494	12.8815
				5	10		2.62646	0.69306		12.6194	8.92901
				6	20		1.42782	1.69439		11.8124	42.9124
				7	3		1.62945	1.00556		19.4307	2.58037
				4	24		0.273088	1.74466		11.0628	51.104
				3	9		0.710611	2.59015		2.63771	24.8864
				18	7		1.74412	1.794		42.9491	14.229
				3	4		0.174086	1.33931		3.57161	5.15259
				3	8		2.08477	3.80615		8.10569	29.781
				6	5		2.17652	2.36741		13.0617	15.1505
				4	3		2.07386	0.516026		7.58565	3.4692
				12	6		1.28757	0.924024		19.8321	7.66333
				5	3		2.39199	2.77498		12.218	6.49193
				3	3		3.1743	5.42499		13.9423	15.1383
				3	5		0.94615	2.19025		3.67811	10.7803
				13	28		2.22101	1.88591		33.8522	68.925
				4	3		1.19741	0.565248		7.47899	4.62017
				10	8		3.98435	1.59272		57.51	14.7328
				7	9		0.410246	1.51906		17.8087	17.7679
				9	12		3.15101	2.09111		35.9248	24.9438
				5	10		2.24248	2.18629		20.9216	21.5728
				15	5		2.12514	0.831488		42.4291	3.82143
				4	6		2.90805	0.425142		14.0324	6.36905
				5	11		1.05876	1.42617		8.31052	17.3132
				3	3		2.01745	2.75037		7.76987	6.87695
				5	9		3.16712	1.87542		19.3693	20.0984
				6	10		1.31478	1.71252		14.0119	25.2018
				12	4		1.73744	2.36062		33.9096	9.3509
				11	14		1.26767	1.53401		21.7818	28.3474
				3	18		0.415686	3.02953		4.48907	61.2415
				12	13		2.0874	4.76726		32.1607	62.8226
				3	5		0.153587	3.1405		5.31642	14.7125
				4	15		0.327654	4.63504		3.35043	68.6142
				3	4		5.66048	5.35736		13.1108	17.7515
				5	4		1.09462	5.09695		11.6609	17.0635
				10	7		0.78506	5.84005		19.6315	38.3374
				6	3		1.98322	6.12537		32.2303	14.1267
				5	3		0.52839	9.52888		32.6029	22.4412
				5	5		0.859114	8.20642		15.4005	35.4457
				3	9		0.100358	6.74232		3.15793	63.4533
				8	11		1.56875	6.32976		16.3466	109.208
				5	5		1.85953	4.12457		10.9441	45.5338
				3	4		0.405491	4.39755		4.67743	20.9301
				16	5		2.20082	6.65275		51.1942	38.2718
				5	14		3.56032	7.02446		18.03	113.005
				8	27		2.40486	3.20045		24.1124	90.8137
				9	6		3.31049	2.6181		36.5022	14.6017
				7	5		3.39339	6.47768		28.2574	30.1006
				13	4		1.226	4.63515		26.1726	26.2586
				19	13		1.08676	6.94113		28.0035	95.0529
				5	7		3.54699	5.07612		18.6648	34.0041
				3	8		3.32584	6.86235		9.12154	57.6413
				9	3		2.58465	9.54955		30.1045	20.4507
				9	4		2.2031	5.13895		25.0134	16.4612
				20	15		1.33526	3.66434		29.8383	92.0917
				8	3		2.49734	1.15098		21.962	3.26852
				17	11		2.29444	4.42439		46.8894	52.4314
				3	3		3.28076	1.45812		8.75288	4.19823
				7	15		3.05826	4.07159		40.59	63.5557
				13	6		3.09578	3.837		44.0509	22.2816
				5	5		2.24045	6.47255		26.0702	28.2696
				7	7		4.95938	4.58256		34.6183	31.3826
				20	3		2.06862	1.6793		65.8533	4.29237
				4	3		1.92095	8.47023		7.60198	17.9522
				9	16		1.90612	3.88393		25.1035	64.4731
				4	33		2.78112	3.20785		10.6616	119.194
				4	11		3.8692	2.36457		12.8037	27.549
				6	9		3.67644	3.45317		23.2727	29.6787
				6	5		4.14585	3.90843		26.2012	17.6902
				4	5		1.54408	3.64224		6.66392	16.359
				14	5		2.75809	2.61315		41.4173	12.3204
				6	6		1.82845	3.16037		14.7287	17.1986
				4	21		3.22344	2.2255		10.461	56.22
				23	7		2.24829	1.77489		66.0848	13.5082
				21	14		3.01332	2.05393		80.6474	32.3901
				3	8		0.884653	3.46863		5.97994	26.6806
				7	4		1.10249	6.32944		11.2021	20.7129
				4	8		3.10603	3.5125		11.7182	28.245
				9	28		1.96348	2.75926		18.3003	89.6547
				14	4		3.63772	1.09627		54.2046	5.01321
				46	3		2.85952	0.823264		209.601	2.58034
				4	11		3.72316	1.84602		15.1915	26.5617
				11	15		2.27893	1.48364		33.0538	27.8437
				11	20		1.92384	2.27281		58.624	54.2909
				7	8		3.78456	2.13801		38.542	20.5368
				6	6		2.53861	0.776545		21.0732	9.53112
				5	12		4.53309	3.06113		27.1719	48.6589
				4	4		5.8325	3.86515		22.9573	14.1841
				7	3		3.88627	0.921581		30.1906	7.53225
				3	3		6.57591	0.434214		17.7801	2.58034
				19	11		2.98425	2.23962		83.1624	29.5189
				5	9		1.5984	2.74423		12.3982	26.1396
				9	5		5.5591	1.44088		56.6334	7.34378
				3	8		1.2737	3.36333		5.2673	27.4997
				6	21		3.60354	2.42824		25.0011	60.1808
				10	3		3.69809	0.264218		42.1136	3.01457
				5	22		8.20606	2.25255		37.2109	59.513
				3	3		1.50524	2.65403		7.46263	7.48325
				14	3		2.75116	1.026		42.0891	5.07066
				4	7		6.55883	2.69712		36.3712	21.356
				4	7		1.7735	3.06644		7.64699	20.721
				6	10		4.52019	2.58947		25.591	27.8232
				17	5		3.08237	3.74251		61.1839	16.1583
				3	4		0.39321	2.82756		9.55981	10.0186
				17	35		3.3645	2.45702		67.7701	100.947
				6	10		3.203	3.78776		18.5215	36.9898
				9	5		2.64899	3.30945		28.2737	14.8914
				4	5		0.249822	4.41531		1.8432	18.4683
				3	3		2.47188	5.45775		11.7224	11.5504
				8	6		2.13576	0.643036		23.1909	4.75934
				11	24		3.08216	2.19772		33.5697	58.1655
				3	3		3.43633	1.66291		7.10231	4.05491
				9	4		1.77964	4.59005		18.673	15.3104
				3	3		1.04854	3.41797		4.03035	7.73717
				5	3		2.32029	0.055283		14.5895	0.532454
				8	5		1.64188	3.55833		15.0482	15.9002
				5	14		2.46158	2.29433		13.3484	37.4691
				7	4		1.92984	1.94007		17.6327	6.56972
				4	22		2.691	1.97328		17.2804	54.2826
				10	5		3.3445	2.42984		32.4024	13.7703
				6	4		1.01413	3.80373		7.20058	13.4099
				7	3		0.855343	1.93526		7.47899	4.39084
				5	8		3.62076	4.32172		16.7315	32.3124
				4	3		2.10389	4.77989		7.08983	10.2313
				5	5		0.795578	2.41759		4.63253	12.3492
				4	5		3.70402	4.76451		18.2717	20.2214
				5	18		3.39146	2.27317		14.3396	44.9237
				10	3		3.16158	6.33441		38.3537	17.3012
				3	10		0.874394	2.30323		2.12169	30.5399
				6	5		2.4346	0.273386		13.7908	23.3424
				6	20		0.7471	5.00847		5.05015	129.394
				14	4		1.84408	5.91451		28.2041	19.3984
				4	4		2.22949	2.10801		8.05249	10.2767
				11	5		3.36682	4.55058		36.06	21.1431
				5	4		3.49686	4.50003		18.927	22.7897
				3	3		2.57839	7.64918		8.26138	32.5709
				7	7		3.89992	4.03582		27.1187	28.3192
				7	3		2.29296	1.51756		22.5273	8.0485
				3	6		4.5914	3.00555		9.62117	26.4638
				5	10		3.32279	3.08242		15.7813	37.4491
				9	13		2.96386	2.77089		29.6541	40.3817
				3	11		0.604147	2.90194		4.57088	36.1998
				8	26		2.98765	2.98263		30.1087	103.656
				3	4		0.503763	1.48681		3.58798	12.7629
				9	7		3.00535	1.45473		32.603	16.3919
				7	3		2.44112	0.530381		19.2096	4.23114
				33	11		1.75145	5.47623		88.5893	68.1112
				16	8		2.28521	7.09811		48.6424	68.0497
				15	14		2.16206	2.76443		38.7345	53.7508
				6	4		2.41082	4.66388		13.4631	17.5428
				5	10		8.39752	3.06509		42.8921	48.9628
				3	4		2.62955	7.45192		9.7195	26.9717
				4	7		2.69646	6.90435		10.3093	63.3147
				5	3		9.88127	7.82736		54.5527	17.9319
				3	3		12.3982	20.9425		28.9086	42.569
				4	9		0.749564	20.2932		20.2131	172.545
				6	4		11.5732	8.22325		77.2029	32.4316
				6	8		7.27342	1.31715		43.2728	10.801
				3	14		0.067642	1.72564		1.59739	30.924
				3	11		8.56854	2.00122		22.433	30.7027
				11	13		10.4108	1.04476		120.865	23.7889
				3	10		2.93062	1.66151		10.342	33.9425
				3	9		8.47636	1.75302		18.9597	29.4903
				3	7		0.233466	2.4036		3.10879	17.0102
				6	9		3.90824	3.86394		49.0397	37.1415
				3	4		0.225274	3.64801		2.33874	12.3655
				3	22		8.98418	2.71481		19.3693	69.9044
				3	17		3.76406	1.90842		10.3175	51.9152
				3	3		1.07517	0.987117		5.91854	4.41951
				3	3		0.432141	2.25889		9.87105	7.02875
				3	3		1.03418	1.751		15.2409	6.25843
				6	6		1.86936	2.64022		19.9222	15.72
				3	8		0.188365	3.21937		14.7616	30.1825
				5	3		0.990234	2.84666		10.1127	10.5101
				12	5		0.677697	1.40081		29.265	8.82253
				17	3		1.13174	3.63512		40.2298	8.72018
				4	4		1.33659	1.73808		5.45978	5.68918
				10	3		1.11179	1.08548		24.9398	2.78934
				4	6		1.51403	2.97932		8.35976	28.5114
				21	3		1.64287	0.669626		52.6401	2.04782
				12	11		1.07309	2.2552		25.9474	29.8794
				11	14		1.35821	2.25235		25.2838	35.6219
				11	7		1.06531	4.47814		24.6818	28.663
				14	18		1.3923	1.59065		37.7394	35.4295
				9	6		1.07518	0.506281		13.7989	3.73138
				11	3		1.69863	2.87733		31.141	7.55273
				6	4		0.566088	3.60439		4.33754	12.6482
				5	5		1.38549	3.56233		9.74054	26.2423
				3	6		0.114694	2.89252		6.58208	16.4696
				4	5		1.36393	0.428048		7.67148	4.03864
				3	3		1.22872	0.256128		11.4316	1.57682
				3	3		0.757696	4.16145		8.08111	10.6002
				6	5		0.564413	0.354288		10.9113	10.9975
				7	4		1.0253	1.99197		12.8612	10.0431
				25	6		1.38938	2.34363		57.1827	14.7698
				19	11		1.18168	2.27771		40.1846	28.11
				33	5		1.22941	1.47352		76.4945	8.13025
				3	3		2.61109	2.85489		6.68856	8.2491
				7	19		1.99058	2.19519		14.1144	56.6993
				11	11		1.3028	1.59905		23.6946	25.161
				4	5		1.19192	0.657392		5.83245	3.15798
				15	3		1.43532	0.344083		33.3815	1.24917
				3	3		1.07723	0.759763		4.41114	1.99882
				10	3		0.903393	2.9716		17.3502	7.27009
				3	3		0.825344	1.17953		4.64064	3.33812
				6	8		0.702733	0.432987		6.59845	5.42702
				3	3		1.64236	0.133069		4.87002	1.41717
				38	3		1.23717	0.204755		78.3747	4.89055
				37	6		1.07709	0.467709		68.307	5.19354
				7	3		0.985758	0.208819		11.0671	1.40892
				4	6		0.775479	0.394852		22.6134	4.313
				5	3		7.44631	1.3066		81.8644	3.71912
				10	22		4.07726	1.1125		106.222	27.5857
				4	7		11.078	1.19125		42.2449	8.85116
				17	5		5.34386	0.263142		229.406	2.0807
				3	5		3.14977	0.145408		44.8211	1.91681
				5	4		4.64584	0.494272		78.1288	3.21527
				7	5		4.73279	0.300022		121.213	3.11297
				15	5		3.58566	0.518128		226.4	3.57158
				5	12		2.47288	1.00499		74.201	14.4994
				4	9		2.82076	0.360986		15.7406	4.00987
				3	6		5.57449	0.354714		52.0464	2.91622
				13	4		3.30093	1.58921		87.3734	5.48031
				3	6		1.2042	0.492301		2.85893	3.22761
				12	3		3.54923	0.403469		44.0469	1.67103
				4	14		11.5832	0.576236		36.0601	13.2665
				4	3		3.76817	0.962458		12.2426	2.64996
				8	5		7.32579	0.575526		54.8314	3.69461
				13	7		3.82557	0.459439		63.642	5.15265
				3	11		7.2518	1.77515		16.3139	20.205
				4	4		7.54595	0.060045		43.5883	0.790515
				4	3		14.0926	0.049203		43.8667	0.888781
				16	9		3.09263	0.920011		69.3392	10.9687
				5	9		2.27217	0.585208		12.8488	14.8681
				15	9		4.43845	2.36179		70.8053	31.7718
				3	6		2.22001	3.08503		5.20991	17.8991
				4	4		7.3289	0.212962		25.4314	1.93731
				19	3		2.58632	0.137248		54.6348	1.15506
				16	23		4.52868	1.8508		77.707	55.2535
				9	9		2.59115	1.64656		34.6143	19.1074
				3	15		5.67892	1.12667		12.2385	24.7309
				3	6		0.58569	2.15282		5.52047	12.8079
				5	3		2.84868	0.030682		26.6149	0.827277
				7	6		2.11824	0.715185		22.9697	4.55864
				4	13		1.0922	0.9789		12.5785	14.837
				9	21		1.8841	1.67931		25.4642	38.5749
				3	5		2.44533	0.208883		10.5756	2.68695
				3	13		0.147469	2.88827		2.08069	41.95
				9	6		1.61073	1.97587		20.5491	12.1771
				4	7		0.165141	1.75302		3.14161	14.1308
				3	4		2.43706	0.611635		8.39251	2.30182
				3	3		3.23167	0.319411		9.71944	1.6998
				3	3		0.198701	0.493613		1.37219	1.51957
				12	5		1.87294	2.82519		26.2177	21.0119
				5	11		1.67933	1.34509		11.2841	23.9076
				10	4		1.21146	0.765939		21.6591	5.21001
				7	5		1.84993	1.78786		22.13	7.64699
				14	8		1.61508	0.630173		31.6611	5.27542
				7	12		1.87526	1.14985		20.1599	14.9746
				6	3		1.38938	0.749594		16.4081	2.58047
				4	5		1.20011	1.07109		10.0268	4.82081
				4	12		2.05064	0.918905		10.9197	13.9711
				21	3		1.95539	0.096307		78.8253	0.794534
				19	3		2.04863	0.796627		67.2707	3.77222
				18	12		1.39332	1.12259		57.5431	17.0061
				4	3		1.49634	0.497638		9.71127	1.61379
				3	5		2.04387	1.31991		7.17997	5.97184
				10	4		2.7306	0.300305		41.012	1.22066
				9	3		2.42271	0.348205		31.0796	1.33117
				21	7		2.09646	1.01237		67.746	9.3018
				17	5		2.08097	0.521213		61.9052	3.65764
				3	7		2.24459	1.52711		7.15146	11.9886
				5	5		1.1131	1.23186		12.4801	6.36093
				18	19		2.1043	0.992592		64.0309	23.0188
				12	5		0.901851	0.381955		31.4891	2.51898
				7	4		1.44655	0.839612		18.4315	3.3586
				20	4		1.48055	0.607509		56.8919	4.28426
				5	4		0.712643	0.404143		14.221	4.30076
				12	4		1.18295	0.150182		36.4656	2.77297
				9	7		0.84324	0.447164		19.8035	4.80864
				3	5		0.290765	0.444403		4.0019	3.08822
				4	3		0.77277	0.444384		15.2203	1.56867
				3	5		1.2676	0.297978		7.90916	2.28956
				7	6		1.56464	0.395689		24.141	3.57976
				6	6		2.40507	0.726589		17.7024	5.27953
				5	10		0.789434	0.746812		7.42994	9.50241
				4	5		1.8254	0.603107		14.5035	3.83791
				8	3		2.35982	0.690163		26.3897	2.24044
				6	5		2.29618	0.633824		19.3204	3.74762
				6	28		1.72767	1.43615		14.8025	48.0815
				12	11		1.15838	0.674592		29.1216	9.3918
				11	8		1.42537	0.210035		31.6694	4.68155
				4	9		0.40413	1.0593		10.1415	10.4199
				6	10		1.54411	0.740918		15.6504	9.53103
				14	3		1.34405	0.33175		40.2011	1.74079
				7	9		1.35025	0.301549		23.1336	4.84128
				12	7		1.32932	1.2977		29.265	9.78916
				11	11		0.931423	0.885114		24.432	12.9429
				12	3		1.18147	0.57959		26.4388	1.91683
				6	4		1.24593	0.53382		13.5328	2.33867
				6	5		1.14191	0.456634		9.24029	3.08835
				32	14		2.19828	1.14086		73.9959	19.5537
				4	3		3.3763	0.370688		10.8499	1.69969
				3	4		2.82003	0.673114		6.4387	2.5234
				10	4		1.87456	0.446511		22.0849	3.44049
				6	17		1.36799	0.873423		22.7403	19.0417
				22	12		1.96173	0.25358		51.7226	6.05783
				12	6		2.15144	0.276083		27.8601	2.6091
				26	4		1.98765	0.129715		56.4329	0.91753
				3	3		0.274438	0.841645		2.06019	2.87932
				10	3		1.60879	0.737235		16.7317	1.76945
				4	4		0.678528	0.677201		2.76069	2.49034
				5	17		2.31004	0.782294		10.6411	18.6322
				3	4		0.450573	0.554308		9.3508	2.12169
				3	11		0.413709	0.198227		1.98243	4.41126
				4	5		1.0171	0.203795		5.57029	2.01105
				3	3		2.03975	0.931795		6.69673	2.62961
				10	12		2.57014	0.582357		36.3304	11.4971
				5	3		1.58412	1.75508		11.6979	4.75957
				10	20		1.92961	1.01447		27.5734	25.7099
				23	4		1.38721	0.069645		44.2641	1.78582
				5	3		2.70534	1.36392		11.7511	4.41952
				3	3		2.66026	0.468947		7.44637	1.3188
				10	15		1.9765	1.96104		20.2993	32.1731
				12	4		1.40415	2.86983		22.5027	10.2929
				12	5		1.88255	2.04589		24.7187	10.0594
				4	4		2.27732	0.349547		8.49902	3.10885
				3	3		0.268307	0.946163		1.63017	2.76886
				3	3		0.282637	1.21242		1.08128	3.76013
				15	3		2.0193	3.13532		33.9343	6.54107
				38	4		1.39803	8.3146		67.5493	25.6156
				8	3		1.61145	9.20554		18.9107	19.2998
				5	6		1.27581	5.74163		6.97121	29.8222
				3	15		0.264205	4.92851		4.78803	78.2558
				14	6		1.41498	3.87308		25.5295	20.4425
				4	7		0.543343	6.60326		6.36919	46.3817
				3	12		0.247757	5.31799		1.94163	76.2448
				8	27		2.90455	3.95978		22.2037	119.432
				7	17		0.857446	3.3494		7.37248	69.6996
				5	3		1.69673	15.1609		11.6774	33.324
				16	6		1.46412	0.296581		35.4006	2.81795
				3	9		0.925715	0.363477		2.6992	5.06652
				5	10		3.63919	0.511902		20.0902	9.33044
				8	7		1.45756	0.2608		28.4705	2.87947
				8	14		2.33696	0.36613		42.5111	9.96952
				3	15		3.91776	0.318877		12.5416	9.77282
				8	5		1.06964	0.524326		17.604	5.34104
				6	6		1.48679	0.627476		24.4032	5.63194
				7	28		1.84311	0.448114		12.4596	24.2025
				6	20		1.6359	0.596245		19.4882	21.4295
				6	12		3.2161	0.373449		18.2717	10.7312
				5	10		1.55236	0.536546		8.19987	9.66217
				13	37		1.58783	0.488438		37.084	32.64
				5	6		1.3711	0.729892		16.1501	5.84878
				19	5		1.57259	0.433114		66.1036	2.50258
				3	9		0.645139	0.389629		7.72901	7.18824
				13	4		2.25852	0.694874		31.2308	3.38735
				6	5		0.780639	0.232451		18.8697	2.04599
				24	9		2.0636	0.143867		94.1765	6.20932
				4	10		2.12302	0.363164		15.6135	7.99925
				3	11		0.67584	0.378092		6.54121	12.9921
				5	3		1.87899	0.167962		21.4502	2.0602
				5	9		1.20805	0.663579		11.8494	9.84655
				10	7		1.62743	0.544019		29.8508	6.23379
				6	3		1.6171	0.640877		19.4145	2.28143
				9	3		1.39056	0.786394		31.4522	7.24973
				5	3		1.752	1.2799		30.3956	4.9316
				12	6		2.72494	0.345695		55.1018	4.30891
				4	10		2.50935	0.452356		12.6194	14.9582
				8	3		2.16674	0.180262		24.1821	2.14218
				5	7		1.28305	0.836873		16.7194	11.9148
				14	5		2.63496	0.5396		47.1108	3.08421
				7	6		2.28755	0.344128		21.9744	3.62083
				5	31		2.59882	0.447404		23.2236	40.4549
				20	7		1.99879	0.581606		56.1218	9.25267
				6	10		1.30988	0.246192		14.5362	15.7857
				6	7		1.06324	0.266903		9.3714	5.31228
				3	5		0.718899	0.320499		5.82034	4.07139
				24	3		2.46216	0.083808		85.8455	1.05668
				20	3		1.75281	0.213011		66.7137	2.47795
				3	6		3.66173	1.07642		10.6862	9.76868
				7	3		1.78926	0.360506		17.6655	2.26916
				5	3		1.21131	0.370637		13.1437	1.97832
				3	6		2.38383	0.965806		11.1982	9.85869
				15	4		1.459	0.390468		50.5596	4.59151
				9	5		2.12783	0.36864		41.6634	4.81266
				4	4		1.32159	0.307196		36.8835	4.72664
				4	3		3.57568	0.648832		16.3139	3.39133
				3	3		3.25413	1.235		7.90911	3.5799
				5	4		2.88752	0.786402		17.0838	4.14912
				3	11		3.25617	0.120854		7.06121	8.51945
				3	3		3.16412	0.604109		6.93021	4.27203
				3	6		1.49085	0.132682		4.12863	4.25965
				3	6		2.55377	0.26293		6.84837	3.22751
				3	5		2.31619	0.188406		5.86531	3.91976
				6	9		1.74078	0.586237		10.5101	15.3514
				3	11		1.24102	0.7487		4.05901	20.3032
				4	5		3.09785	0.268224		10.2111	5.32865
				17	7		1.69799	0.234146		43.6702	6.65986
				19	7		1.24037	0.523582		58.227	7.86824
				4	4		0.965278	0.266189		7.73711	1.58917
				5	3		1.41717	0.170003		8.32284	0.83936
				3	3		2.34079	0.249798		5.41879	1.73626
				10	6		1.74209	0.39893		17.8825	15.1916
				8	5		1.63342	0.206851		13.5614	9.56385
				3	3		1.43767	0.212998		3.59624	2.03157
				6	3		2.31418	0.725075		13.4427	6.72133
				4	11		0.479215	6.19867		2.22406	66.4187
				4	4		0.962496	0.376887		4.99283	1.99878
				23	3		1.70668	11.9394		44.9236	25.6607
				3	14		0.812998	2.52342		3.12938	38.9148
				11	4		0.641412	0.688038		11.2021	7.73311
				6	7		1.62446	7.74187		9.91204	51.8825
				3	12		0.729024	3.69597		1.80619	72.284
				6	3		3.06864	0.985075		17.3214	3.5511
				9	3		1.68703	0.561171		16.4573	2.11759
				6	6		1.79072	6.15446		11.9396	32.9718
				16	8		1.43192	1.80392		26.9919	27.8193
				5	3		2.41451	0.16585		14.6715	12.5784
				3	3		0.315424	0.174054		1.60957	3.66177
				3	6		0.534515	3.91978		1.79808	23.113
				5	3		1.62819	2.56225		10.0103	6.16019
				3	20		4.07133	1.10915		11.62	30.3299
				5	11		4.38771	2.25685		22.1505	29.4248
				9	5		2.92139	1.45503		27.4751	9.97756
				9	6		1.76431	2.85397		18.5213	27.2007
				5	4		2.19029	1.64652		9.74818	13.074
				3	3		0.259853	3.47942		1.44181	12.0009
				7	5		1.37826	0.527363		13.0085	3.94024
				4	3		0.386338	0.202739		2.08068	5.98007
				3	5		3.29515	1.9598		8.68325	17.7188
				3	4		0.52839	4.46449		2.60909	15.634
				6	3		1.23286	4.00575		9.56791	8.63002
				6	12		2.372	3.23389		15.0688	40.7006
				3	11		3.7252	2.94497		12.4924	36.1337
				5	5		2.14421	3.14874		11.0589	15.7076
				11	8		2.10567	3.045		28.5114	26.1071
				21	5		1.21155	2.92041		33.84	14.5199
				9	18		1.15652	2.71961		14.7983	58.0426
				4	14		5.79972	2.09042		20.8685	38.2226
				4	3		4.29112	0.188448		13.8604	1.99059
				3	7		1.62404	0.849924		8.83887	63.3427
				4	10		0.121553	2.24182		1.13047	27.2212
				5	3		0.655389	0.720896		4.82911	7.22922
				4	8		2.42612	1.36217		8.25327	22.5315
				15	27		1.66385	1.37183		30.8542	215.078
				7	6		0.748179	1.83825		8.04027	27.8192
				3	3		4.1	0.276448		8.97004	1.24917
				7	4		1.12499	1.33662		12.1483	21.6877
				3	4		5.04202	0.613013		15.1463	15.802
				11	6		3.8792	0.19988		44.301	1.81046
				3	4		7.7903	0.47648		16.1582	22.0522
				6	6		6.50182	0.294856		33.4429	12.1935
				4	4		7.73846	1.75035		25.7097	9.50241
				6	7		8.15161	0.873111		44.0142	16.1787
				6	4		5.22378	2.48893		31.2597	13.2705
				6	4		7.42989	1.97969		40.5041	11.1407
				9	10		5.57913	2.30278		48.4624	27.9913
				7	8		4.91715	2.29665		35.2819	25.3617
				3	6		3.45491	3.79444		10.5592	23.0311
				22	22		3.58644	1.15738		87.025	51.1452
				8	9		6.49138	0.994283		49.1014	16.7932
				11	47		2.48494	1.23972		29.5804	97.064
				11	31		6.8823	0.732212		76.3923	42.8224
				5	3		5.01024	1.05885		23.1907	4.42751
				10	6		3.09009	0.924119		30.6903	12.001
				7	3		3.60163	0.09424		25.8818	6.44695
				4	3		2.6118	0.602106		10.0472	5.37389
				4	14		6.64358	1.32896		26.7216	30.9116
				15	6		3.91653	1.76126		69.0974	10.5918
				4	10		5.17853	2.36743		18.6116	25.4108
				5	8		6.05878	1.9432		28.0773	17.002
				6	13		3.42986	1.61107		48.3641	24.2435
				8	3		4.76935	1.69356		45.243	6.31995
				6	8		4.36782	2.47565		27.9134	20.1025
				5	3		2.29983	2.49853		14.9582	6.10696
				4	5		2.44934	1.97216		8.61777	9.24026
				7	14		8.98704	1.99907		69.2858	31.1287
				5	7		0.56624	1.19465		4.00987	13.7908
				3	3		3.22957	1.81045		7.67149	7.84769
				5	6		2.31006	1.59414		12.6604	19.8076
				62	8		1.93439	1.20535		134.955	10.6492
				23	5		1.19078	2.78311		36.0028	15.2202
				11	6		1.87056	1.91029		22.2979	14.5813
				7	4		2.68553	1.53458		18.2594	6.95071
				13	8		2.09303	1.23633		26.7788	13.7908
				3	13		0.430086	1.09978		1.51959	21.3313
				6	7		3.32908	1.16935		18.6117	10.9196
				4	4		1.13458	0.950246		6.07416	8.08114
				4	3		2.16403	0.204838		7.74122	1.95782
				5	4		2.46679	0.283934		10.7148	1.9578
				8	5		2.36099	0.234499		22.3307	4.82089
				3	4		3.02074	0.199296		7.11858	6.07859
				7	10		2.05479	1.1004		14.1594	14.7083
				39	8		1.67047	1.2522		73.5128	13.713
				16	9		1.91116	0.868334		31.8905	12.7095
				10	4		2.20722	1.5605		21.9293	6.15208
				54	17		1.17295	1.00784		73.2016	28.4335
				25	13		1.56259	1.45674		45.6726	26.3284
				7	3		2.08274	2.11959		16.3508	6.16015
				4	8		2.95182	1.01578		14.221	12.5007
				15	10		1.34433	2.08254		22.4536	23.9894
				8	9		1.75302	1.53333		14.307	19.4307
				3	3		2.50264	0.276493		5.45976	2.62958
				8	4		1.96778	0.221124		16.961	4.71853
				38	5		1.0853	2.55789		57.8829	12.4391
				11	5		1.53719	1.44889		17.6983	10.3016
				9	5		3.00583	1.81347		27.344	9.79319
				28	5		1.50351	0.454634		57.5922	3.53887
				7	5		2.10942	1.72333		17.0922	9.8834
				14	6		1.25145	1.78982		22.2242	11.6773
				6	11		1.23937	1.29876		8.47027	18.9884
				16	3		1.0712	2.39816		21.0979	6.85231
				13	4		1.91654	3.17285		27.7988	11.7019
				45	8		1.03777	2.11352		60.1806	15.9332
				44	16		1.05434	0.282342		57.8419	8.56863
				4	6		1.10862	0.865897		3.89115	5.39037
				13	6		3.92145	0.382569		66.4597	2.85901
				5	11		2.34179	1.15708		27.2335	13.6067
				3	17		0.038867	0.478958		3.42012	11.4727
				3	3		5.00315	1.39465		11.1612	3.37088
				8	3		8.74525	1.34348		74.5041	3.19886
				6	4		2.19537	0.423215		15.0441	2.02744
				4	3		2.89858	0.679994		10.5223	1.63832
				8	3		0.919834	0.528333		9.95707	1.94155
				3	8		9.11534	0.43477		22.2898	3.83791
				8	3		4.85362	0.360397		46.2425	1.01992
				31	4		0.973663	0.338594		44.5017	1.65069
				4	5		1.36258	0.159725		6.22171	1.66707
				6	5		4.52104	0.221226		50.8298	1.81065
				8	6		0.908118	1.85234		7.9461	9.96964
				5	4		9.4031	0.487394		41.6018	2.1872
				9	4		0.591837	0.412352		7.16785	1.87173
				4	3		0.726366	2.06438		7.63473	4.9274
				4	5		0.608922	0.441216		2.38753	2.69094
				24	3		2.63741	0.470989		67.3935	1.35992
				3	3		14.3745	3.71086		29.1913	7.88874
				22	7		3.16378	1.14274		83.9941	7.81914
				6	8		9.77446	1.33879		54.0614	10.3991
				3	9		2.57021	2.2459		7.45047	18.9231
				5	3		6.43874	0.135194		28.9045	0.66359
				7	4		1.37283	0.346799		10.0718	1.76945
				4	6		1.18773	2.28877		13.5287	13.9098
				7	5		6.42301	0.241626		44.5508	1.69302
				7	4		6.21413	0.264909		45.9844	1.40073
				7	11		3.65012	1.70348		27.598	19.0911
				9	4		4.57713	0.158391		41.7616	0.782374
				9	5		5.4137	0.203741		50.9527	1.76129
				5	11		1.77958	2.40923		10.3216	25.8125
				4	12		13.186	1.24055		40.7336	15.2697
				6	6		7.31035	0.750441		42.9207	4.62423
				3	3		11.7756	0.346138		27.643	1.22066
				13	5		10.4621	0.225254		140.697	2.26925
				7	6		5.24613	4.65626		37.383	24.1127
				10	5		5.63099	2.04795		60.1889	9.55994
				11	3		8.90605	0.118758		97.5064	0.770074
				9	4		3.42619	2.24733		32.0216	7.72904
				4	5		1.9033	1.70493		7.40931	7.97464
				7	12		2.90873	2.28368		19.2424	27.2911
				23	42		2.18107	1.76806		52.6034	83.5816
				10	3		1.48548	0.231424		15.6176	1.47039
				7	8		1.94744	0.836176		17.1987	9.87124
				12	4		3.35561	0.227998		40.4509	1.2001
				14	4		4.25624	0.701815		58.6733	3.31772
				4	7		6.53292	0.163881		20.1727	2.24045
				18	6		1.74459	1.05835		37.9073	6.35281
				6	19		8.62425	1.1878		45.5134	28.9168
				7	3		5.56561	0.522208		35.7611	2.01508
				7	19		6.79094	1.27951		43.1008	34.1267
				4	3		4.33756	0.683891		14.4707	6.62308
				8	5		2.18195	1.6936		19.1316	8.58092
				25	3		3.60196	1.5238		96.2326	6.46733
				11	4		5.46678	1.68752		57.2193	11.5872
				6	4		4.52432	0.711313		24.9685	6.67634
				25	10		3.90302	1.11		102.294	11.9845
				14	5		5.53541	2.3982		75.8146	10.94
				11	18		3.58312	0.736311		40.1108	16.0764
				3	3		13.1867	1.45537		27.4506	3.23159
				4	16		5.73563	0.791311		19.6398	22.863
				3	8		16.3897	0.542971		33.8155	11.321
				3	21		9.1256	0.772697		19.2997	23.2236
				3	24		6.05585	0.866916		13.3443	30.0922
				5	4		7.54666	0.894323		31.821	7.18822
				9	3		4.34215	0.608275		40.7662	1.61793
				4	10		2.51893	0.526527		11.7225	8.48681
				6	8		11.5782	1.47569		63.4329	12.3449
				12	9		5.83255	1.54566		73.3818	15.0112
				7	29		6.87147	0.697033		44.5018	27.2826
				7	29		7.3466	0.967632		48.3519	36.3139
				4	6		2.88362	2.05694		13.9011	16.9281
				8	7		3.83494	1.28062		31.5587	8.46614
				10	3		5.7957	0.03687		57.334	1.50301
				3	7		1.7735	0.838908		4.91081	7.15561
				6	3		4.94043	0.27863		27.7905	2.85485
				4	17		5.54434	0.847824		20.5204	22.2774
				6	15		7.84122	0.344364		46.1932	12.0051
				7	6		6.79706	0.185912		77.2115	5.17304
				4	7		3.80918	0.65325		13.3812	7.24974
				5	8		4.72667	1.87703		20.6433	18.4682
				11	7		8.83533	0.918839		95.0162	16.5678
				3	7		6.02303	0.909948		13.2131	14.0569
				3	21		1.59119	0.956775		4.33391	29.5231
				9	11		5.35279	1.0309		55.5396	14.1143
				3	8		0.956429	1.10584		46.1395	11.3742
				3	35		3.29518	0.940707		9.84242	41.8516
				10	34		2.1649	0.68994		25.9187	35.7813
				9	31		3.96737	0.626112		34.5814	28.3065
				14	22		2.6718	0.609505		39.8941	23.2851
				11	21		4.25766	0.640018		49.6707	19.6889
				8	3		1.3808	0.235494		13.201	0.835533
				3	19		5.01748	0.513284		11.1612	12.9346
				15	4		3.06898	0.121463		49.601	2.47395
				5	5		2.75944	1.28505		11.8985	19.0007
				9	4		3.14203	0.75639		28.753	3.51825
				11	8		2.03809	1.1439		22.3675	19.8607
				5	6		3.38187	0.421699		14.6918	6.08648
				3	18		3.1191	1.34392		7.12271	29.355
				4	4		1.48404	1.39537		5.86118	10.1577
				12	7		3.7801	1.06218		45.1816	7.85586
				21	13		2.94599	0.421907		65.5013	9.26478
				39	3		2.70799	0.40144		115.135	1.26962
				7	13		3.889	0.452615		25.3943	7.0122
				9	10		3.53783	1.03035		31.4727	11.0345
				12	5		2.39722	0.37679		29.1626	2.22415
				5	6		1.52047	0.208873		8.0075	1.81856
				8	3		2.08069	0.167949		17.3419	1.07306
				14	5		2.12514	0.260099		34.7248	1.65873
				3	3		3.71501	0.516019		8.81016	1.25756
				8	4		3.87938	0.625434		29.2815	2.58442
				9	6		1.60866	0.501184		15.9494	3.26016
				58	7		1.48105	1.29296		97.277	8.38847
				10	16		2.58816	1.13866		24.9112	20.1642
				7	7		2.99682	0.230063		18.9434	2.33053
				5	6		5.00215	1.49997		21.5238	8.1141
				12	13		3.35524	1.32708		38.8779	18.1408
				16	9		1.9723	1.0614		32.9882	9.71123
				3	3		0.862157	0.751539		2.92059	1.84732
				9	5		0.595438	0.538656		6.13981	2.74844
				6	4		0.614413	1.17277		5.3493	4.39087
				4	17		0.20745	1.0652		2.83021	20.3444
				10	5		0.43331	0.623568		7.51183	3.30962
				7	3		0.486679	0.649235		6.615	1.54825
				5	4		0.902147	0.084689		4.08787	0.880614
				6	8		0.150717	0.475074		2.03981	4.41951
				4	4		0.550225	0.64986		3.35849	2.58853
				5	3		0.459802	0.487322		3.74359	1.43766
				3	3		0.210944	3.43041		1.2165	7.27839
				3	8		0.452576	1.1188		2.19135	8.76115
				6	3		0.20982	0.659597		2.3183	1.98665
				3	3		0.190368	0.679814		0.74967	1.65884
				5	11		0.200701	0.468148		2.10929	6.67218
				6	6		0.238374	0.470953		2.54774	3.70689
				5	6		0.335846	0.740557		2.09713	5.18954
				3	3		0.731136	0.71481		2.19942	1.6793
				4	7		0.655356	1.47319		3.15383	9.53943
				6	3		0.136356	1.02814		2.13807	2.43712
				6	7		0.563556	0.41027		4.1779	3.62904
				7	6		0.352913	0.706816		3.13751	4.52994
				4	15		0.346778	0.748098		2.76056	12.0913
				3	3		0.085997	1.11002		0.618573	2.50671
				3	5		0.299008	2.46885		1.00768	10.4077
				5	4		0.23455	0.924267		3.06785	3.39955
				5	5		0.107523	1.47331		1.97016	6.82812
				3	3		0.284672	3.61049		1.24917	7.8192
				4	11		0.722249	0.694273		2.97775	8.26139
				4	3		0.805551	1.81647		3.91967	3.95654
				6	11		0.400543	1.35698		3.33408	15.2
				3	5		0.547469	2.54569		2.07242	11.3335
				3	10		1.42129	1.70752		4.09185	16.8712
				3	5		0.282662	0.485315		0.917478	2.54351
				6	15		0.132936	1.52106		2.19957	24.809
				5	5		0.820214	2.01723		4.76763	9.34277
				3	4		0.835635	2.28701		3.48974	7.40134
				6	6		0.11713	0.478433		3.05146	3.14967
				4	3		1.04173	0.239648		3.90751	0.950272
				7	8		0.324222	1.65826		3.3996	12.5499
				3	3		1.22794	2.55182		2.98182	5.53704
				3	11		0.64105	1.93184		2.62959	20.6885
				3	6		0.434144	0.108982		1.76937	1.47039
				7	8		0.171326	1.31025		2.54775	10.2398
				8	3		0.436515	2.72789		4.96842	5.92257
				3	6		1.30038	2.51326		3.30947	13.6845
				6	7		0.624151	2.21319		4.84141	14.1432
				8	22		0.272591	1.37116		4.95191	32.3578
				3	15		0.940038	0.635774		3.09244	12.2509
				3	3		0.309293	1.09162		4.04268	2.42885
				3	11		0.765984	0.7139		2.5313	9.20769
				5	12		0.604755	0.669548		4.9314	8.79802
				5	6		0.570355	0.416131		5.61955	3.0228
				3	4		0.628736	0.457404		3.17848	1.62607
				3	4		0.258067	0.70042		1.58097	2.89173
				3	6		0.531462	0.352264		2.51081	2.44119
				10	6		0.648037	0.18592		9.15029	3.69025
				4	8		1.62194	0.163845		6.82799	3.33011
				6	7		0.502159	1.66696		6.63118	14.3437
				5	5		0.25295	1.55019		3.79283	8.35191
				3	9		0.21088	1.12027		2.65834	26.6927
				3	14		0.606195	1.86871		5.30829	39.1482
				3	4		0.851974	2.16141		2.20358	9.78106
				3	7		0.116698	0.791138		1.40078	16.7971
				3	4		1.40701	1.4704		5.64411	15.2366
				5	7		1.366	1.99404		7.47913	19.9552
				4	6		0.913404	1.08291		4.89052	23.4733
				8	14		0.385055	2.73417		6.05795	69.093
				3	4		1.00765	1.05807		8.10986	7.74125
				3	5		0.798771	0.828026		5.77115	4.91101
				3	6		0.466912	1.22292		2.26911	10.596
				9	3		0.485867	0.790368		8.41243	7.68374
				7	4		0.84784	2.37972		7.81096	7.87629
				3	16		0.241613	1.94426		1.40504	58.8207
				8	6		0.389144	0.387448		4.76353	15.4497
				6	8		0.372677	0.581575		3.02267	8.122
				4	39		0.103804	1.09852		2.80984	88.3068
				4	4		0.505182	1.64242		4.87825	11.0915
				3	7		0.505824	1.96533		2.53123	41.3723
				5	8		0.631846	1.92858		7.47099	24.2762
				6	9		0.736456	0.580635		8.42939	6.90559
				3	7		2.28556	3.27518		7.06958	45.0669
				7	4		0.848535	1.23701		6.95899	5.11977
				5	4		0.764957	2.50533		4.28019	18.5218
				3	18		0.311264	2.27021		2.19957	74.6266
				7	44		0.617114	1.45981		13.6395	116.781
				4	15		0.79997	1.64829		7.48324	30.2069
				5	4		0.159741	1.05261		6.36092	6.42633
				3	4		1.71834	0.921724		5.41882	8.23675
				8	12		0.198367	1.918		4.30889	36.3918
				8	8		0.394957	1.35636		5.48035	39.8527
				5	18		0.825382	1.56167		5.72625	52.902
				8	18		0.291478	1.62993		5.49262	88.401
				3	44		0.323578	1.04682		1.45006	78.3088
				6	10		0.414548	0.649411		3.69048	12.9717
				6	6		1.04361	0.396436		7.93789	3.38725
				10	3		0.412416	0.966714		8.87987	2.69106
				5	3		0.596003	0.176128		4.19421	1.13866
				6	4		1.16812	0.357769		8.26958	2.15032
				60	8		0.26743	0.190142		36.5232	2.49033
				3	4		1.03226	0.447799		8.40888	2.01107
				8	9		0.094766	0.836581		2.92867	8.29423
				4	4		1.04313	0.675849		4.30076	2.76886
				3	8		0.270342	0.337605		1.55227	2.94084
				7	4		0.6151	0.862903		6.81973	3.01873
				9	4		0.285686	0.660843		5.21815	2.6992
				11	10		0.751613	0.931584		11.2392	9.94081
				5	4		0.465971	0.325018		5.24698	1.83094
				5	5		0.398294	0.399382		4.1003	2.41245
				3	10		0.710637	0.350451		2.49029	4.46053
				9	8		0.167067	0.544208		3.78047	4.70202
				3	16		2.46353	0.783414		6.16435	13.9712
				7	3		0.12704	1.33116		2.22821	3.2276
				3	3		0.274394	0.700461		0.778278	2.05206
				5	4		0.973802	0.604847		5.42293	2.21996
				38	3		1.15647	0.507898		55.8306	1.45005
				3	10		0.153594	0.762286		1.14278	7.93786
				7	12		0.447814	0.665392		8.38828	9.07666
				5	5		0.222166	0.970691		3.46098	4.57926
				20	5		0.578586	0.232474		17.9603	1.5483
				13	8		1.13046	0.338787		16.9118	3.5306
				4	13		0.389137	0.693895		2.5314	10.0965
				9	6		0.906802	0.453814		14.8395	3.11709
				15	4		0.724995	0.432806		16.1705	1.6138
				3	3		0.75975	0.751597		2.51082	1.82268
				4	3		0.426022	0.708512		2.9121	2.03557
				14	8		1.03686	1.00115		16.5883	7.98701
				3	4		0.769965	0.237598		2.87121	1.0609
				11	26		0.464525	1.15505		7.89677	31.7639
				11	6		0.301533	0.509583		6.16434	3.91974
				6	5		0.684024	1.69464		5.00088	7.41359
				5	14		0.708515	1.46666		3.27262	20.5903
				11	7		0.690131	0.269585		13.4303	2.17082
				3	13		2.14017	1.06391		7.02034	14.1801
				3	7		1.35985	1.25539		4.81265	8.13051
				4	4		1.04583	0.572062		5.61133	2.29782
				7	3		0.71136	0.939853		5.97182	2.15031
				3	8		0.067488	1.03509		1.12639	8.34339
				5	9		0.371677	1.03988		2.87105	9.34277
				35	3		0.862296	0.681965		39.9101	1.80631
				6	4		0.163725	0.606195		8.23676	2.53946
				26	3		1.2535	0.661517		47.7127	1.87195
				3	5		1.7858	1.58509		4.30074	8.06075
				6	7		1.01495	0.289466		7.54851	3.16209
				12	6		0.640876	1.50451		15.8263	8.8513
				3	4		0.294938	0.28535		2.85485	1.38003
				9	6		0.850896	1.48104		11.8698	7.89272
				5	3		0.142371	0.714778		2.96534	1.78181
				7	3		1.09362	0.778214		9.17067	1.75706
				4	22		0.083255	1.15017		2.81376	26.9019
				8	3		1.1281	0.860083		11.7961	2.55985
				6	4		1.44577	0.415014		11.4156	2.01106
				4	6		0.748139	1.26562		3.63313	7.2416
				6	3		1.31321	0.217082		7.74537	1.04851
				12	6		0.723086	1.36557		12.5741	7.56924
				3	3		0.845862	0.942022		2.45347	2.39208
				12	11		0.743941	0.908083		15.6175	10.9893
				5	3		1.68032	2.94908		8.04416	6.6601
				6	12		1.10418	1.18634		7.89686	14.4505
				3	5		0.903168	0.373728		3.82149	2.09718
				4	5		1.05402	0.314358		3.59199	2.03982
				4	5		0.608892	1.92502		4.16536	8.94965
				4	6		0.312678	0.670098		2.90795	4.46866
				9	4		0.877034	0.514722		10.8418	2.71158
				3	3		0.512	0.563194		2.32233	1.33115
				11	3		1.08622	1.21442		15.6587	2.81797
				7	5		0.485404	0.710586		5.57029	3.38321
				3	13		0.399315	0.859827		1.90043	11.8209
				5	6		0.119818	0.390735		2.79767	3.50198
				13	3		0.823862	0.378893		11.4521	1.40092
				6	7		1.22701	0.312698		10.8255	2.57233
				3	4		0.13312	0.126925		1.69156	2.26094
				10	5		1.07764	0.302061		18.9106	1.90867
				5	4		1.18474	0.425975		6.96296	1.77354
				4	3		0.430025	0.890822		3.32998	2.07244
				6	4		0.867525	0.11462		7.22921	1.06904
				12	4		1.28126	0.525687		20.2048	2.17907
				6	4		0.462011	0.427345		5.32067	1.76943
				7	7		4.26729	0.307913		30.4695	2.7771
				7	3		0.464211	0.815104		5.71798	1.97016
				3	7		0.245715	0.22806		1.15905	2.85491
				7	6		4.43862	0.989609		35.7123	6.3487
				5	3		5.44144	0.466918		25.1529	1.87181
				13	3		2.2995	0.362413		51.6784	1.35978
				3	4		0.729107	0.389039		8.0444	1.68342
				6	6		0.239245	0.355507		4.42346	2.76892
				5	3		0.168934	1.09359		5.52945	2.48216
				4	4		0.563738	0.935253		2.80986	3.25216
				10	3		0.920686	1.43565		15.2286	3.20714
				5	5		0.222186	0.327699		3.19895	2.28966
				9	4		1.69214	0.839723		27.6721	3.21938
				4	10		3.7437	0.276718		16.6786	3.96904
				6	7		3.88051	1.25269		21.991	7.9911
				4	9		1.64515	0.40087		8.94139	3.98948
				12	10		3.72728	0.164328		50.9941	2.44945
				5	4		0.365549	0.471006		3.85427	1.89229
				11	3		1.42208	0.880666		19.1812	2.04796
				10	5		0.336774	0.311245		5.6897	1.94561
				13	12		1.65371	0.410011		22.4129	5.85303
				4	9		1.03489	1.31734		5.55818	11.6938
				3	4		1.80635	1.12905		3.96073	3.78065
				9	6		2.39662	0.56523		24.7436	3.4201
				3	8		1.55031	1.26097		3.73134	9.81792
				25	4		2.62565	0.550234		71.3839	2.16256
				3	10		0.761805	0.884772		2.31021	8.90052
				17	8		3.1275	1.52019		55.7536	11.399
				9	3		3.3617	0.464819		29.1712	1.29016
				4	4		0.349414	0.187059		2.13801	3.33811
				4	4		3.45289	0.262118		12.2386	2.42057
				7	3		2.26505	0.335866		33.3484	1.01175
				6	8		2.57956	1.1176		19.7666	9.18712
				4	13		5.67414	0.793232		19.0006	10.7518
				7	7		2.12982	0.423262		16.7398	3.30954
				4	5		1.34338	0.439376		6.1643	2.50721
				5	18		1.2881	0.873202		13.713	16.8424
				5	6		4.89865	0.193331		23.5512	1.60141
				9	3		3.66682	0.276518		36.3344	0.757773
				12	13		2.08975	1.03391		27.5079	13.6353
				10	5		1.42717	0.270301		18.3986	1.76117
				6	15		1.88323	0.994764		11.7919	16.1625
				6	5		3.95659	1.49502		28.024	6.7993
				3	14		3.61456	1.09428		14.8762	15.2288
				10	16		3.69901	0.89673		45.7139	15.1591
				3	3		10.0636	0.428064		42.9697	1.83908
				6	4		5.84767	0.200461		34.4708	1.40904
				24	4		2.91428	0.237606		82.6382	1.47869
				3	6		2.65409	0.474276		6.94244	3.11274
				4	4		2.0944	0.420599		9.35904	1.60968
				25	5		3.03061	0.240614		90.3588	1.87181
				22	16		3.02159	1.66215		80.0864	26.9227
				3	8		0.647162	1.01283		1.93732	8.43763
				10	24		3.66804	0.945461		42.0031	25.0712
				5	10		2.10728	0.92386		11.108	9.67454
				4	15		2.39617	1.05469		7.78637	16.9037
				11	5		0.820412	0.256989		11.1982	1.55231
				22	3		0.421111	3.31971		14.7412	16.6335
				4	6		1.18645	1.05842		4.81249	6.54932
				13	5		0.261135	0.206816		6.84835	1.78166
				16	5		0.512101	0.248861		10.4815	1.82682
				7	7		0.579563	0.365246		5.0953	3.27258
				10	4		0.348163	0.872457		4.91503	3.35873
				8	27		0.631965	0.994651		8.59727	33.7997
				13	6		0.544065	0.620964		11.571	3.8706
				8	18		0.880004	0.835331		8.63827	18.0795
				7	5		1.48269	0.981984		10.8132	4.67754
				4	3		1.39397	0.362496		5.23871	1.24106
				7	3		0.554332	1.07512		4.75127	2.69921
				7	3		0.677235	0.62064		6.34871	1.54418
				5	8		0.836614	1.62777		4.03852	13.414
				4	4		1.63151	0.196591		6.00056	9.17065
				8	3		0.389678	1.91275		5.02979	6.62291
				4	5		0.383671	3.36167		1.58916	13.926
				3	5		1.23076	2.41552		3.52247	11.2227
				3	4		0.50583	1.03349		1.24104	4.77577
				5	15		0.906214	1.84315		4.39076	28.5358
				10	3		0.547479	2.35107		7.27037	5.61129
				7	9		1.01374	1.32193		7.13098	12.2877
				4	3		0.143343	5.97168		1.58917	12.2139
				3	3		0.045062	0.383053		1.06917	3.21536
				4	13		1.08133	0.596316		4.21877	8.80603
				7	16		1.02124	1.43656		8.14275	24.3704
				3	37		1.55642	1.12158		7.67985	47.959
				4	10		0.733103	1.50452		4.30888	15.8879
				3	5		1.749	0.366608		5.02977	3.55529
				3	15		1.08947	1.18928		2.70332	19.1933
				7	4		0.852661	2.04798		6.27082	7.11447
				3	4		0.620518	5.42159		2.15045	19.6517
				4	13		0.91616	2.15817		3.44874	28.0402
				4	10		0.916113	0.599792		3.32184	7.09398
				13	6		0.998053	2.10445		16.1297	11.9108
				6	16		1.96441	0.935759		11.403	16.0352
				7	32		1.09492	0.63549		7.92978	28.8758
				8	12		1.27733	1.07013		9.97354	15.4823
				4	8		0.197918	1.03802		1.81857	9.24855
				6	19		0.431716	1.36457		3.75186	28.2327
				7	31		0.565894	1.35065		6.43058	49.6706
				4	5		0.576175	2.79645		2.47808	13.5614
				7	25		0.850581	1.33632		6.27907	42.343
				12	27		0.586825	1.36611		9.28128	42.134
				10	4		0.730893	2.94763		9.0519	10.5387
				5	11		0.125926	0.806495		1.24917	11.0343
				8	5		0.67465	2.82922		7.7495	11.9682
				3	20		0.231386	1.95501		1.29829	46.3038
				11	5		0.688502	2.61009		8.3025	18.4149
				8	16		0.631333	0.60649		5.95956	13.201
				10	8		0.713136	0.572286		9.34276	6.0496
				6	13		0.149133	0.596962		1.99881	9.7892
				8	5		0.75657	0.425978		7.74962	3.03909
				6	9		0.985441	0.342514		5.93082	5.5008
				4	26		0.617143	0.465286		2.84257	19.5619
				10	6		1.07996	0.609503		12.001	4.55051
				8	3		0.899953	0.356314		7.62245	1.56879
				3	5		0.069638	0.315907		1.35167	2.2694
				13	5		0.418158	0.67175		9.11754	4.85766
				6	3		0.332531	1.11816		4.43977	2.76058
				8	13		0.699207	0.518804		6.57809	10.6288
				5	12		0.441325	0.411444		2.53944	7.02035
				6	21		0.909302	0.333037		5.41892	11.2105
				8	22		0.435344	0.414272		4.53018	14.3601
				3	4		0.438272	1.25746		1.33129	4.82488
				3	3		0.258061	1.86975		1.10179	4.57515
				5	14		0.68808	0.914596		3.84598	16.2811
				11	16		1.05226	0.562502		14.0818	11.8781
				4	10		0.69498	0.322231		2.53946	5.75058
				14	3		0.935119	0.831366		15.4292	2.69921
				3	3		0.200736	0.229402		1.32719	0.712678
				5	6		1.05169	0.754447		14.1515	5.36966
				5	15		1.63326	0.361022		7.4996	7.60203
				3	3		0.159661	0.176147		0.888883	1.33115
				4	4		0.419191	0.483264		2.10947	3.13748
				5	3		0.529376	1.05059		2.77693	2.75245
				3	11		0.735168	0.668032		1.99068	9.21167
				3	4		2.45558	0.983019		5.43119	5.63194
				4	15		0.435516	0.422457		2.19546	9.6418
				5	8		0.992192	0.117601		5.31242	2.54346
				5	6		0.459734	0.575967		2.67469	5.27141
				8	5		0.200735	1.07928		3.38737	5.19767
				4	9		0.832815	0.979963		3.23173	9.53117
				3	5		1.83899	0.246778		3.9552	3.30947
				7	6		0.841681	0.211292		6.66406	2.23229
				3	15		2.07051	0.732583		4.44001	13.7089
				7	15		0.382276	0.281717		3.2112	7.22111
				9	10		0.667157	0.180211		7.19661	4.50552
				4	4		2.41249	0.810978		14.4299	3.66989
				5	8		2.41657	0.399636		13.9628	4.61602
				15	8		2.75908	0.497931		54.9419	5.99218
				3	11		0.278451	0.238801		6.79082	4.62013
				4	10		3.03771	0.122426		12.5579	3.29309
				5	4		3.16301	1.11681		14.1143	3.801
				4	10		0.774178	0.463242		8.4661	7.81088
				3	4		1.26564	1.35437		18.9844	4.57102
				14	13		3.19068	0.322229		54.0613	7.38083
				4	7		3.28639	0.98301		15.6545	7.23748
				12	19		2.03191	0.508134		33.8604	12.8202
				6	16		3.55028	0.546641		22.3348	11.5422
				4	7		1.35171	0.203445		4.7184	3.05972
				6	7		1.97094	0.860119		25.2059	6.76233
				4	4		0.062793	0.505139		7.58964	2.59684
				5	7		1.72047	0.466244		15.0276	4.98876
				22	6		2.98373	1.1566		85.7918	6.25032
				17	6		2.7788	1.03132		55.0729	6.75007
				16	3		2.83185	1.04861		58.8575	2.76872
				10	23		2.85755	0.647338		32.2425	18.7591
				4	14		1.64243	0.28262		7.87621	6.00856
				9	7		5.29602	0.670353		50.1252	5.74241
				9	21		4.63445	0.378469		51.1163	12.3979
				4	25		1.6875	0.628533		12.3244	21.0243
				15	7		3.14294	0.248482		57.125	4.00175
				18	3		2.97623	2.66645		67.2663	6.72131
				23	4		2.29126	2.06568		68.8064	6.8319
				64	5		1.51109	1.48166		128.786	7.72074
				5	5		3.84597	0.472048		22.982	3.36274
				4	4		0.169259	1.74487		1.27379	8.70362
				4	8		0.058684	1.2124		1.5524	14.6427
				7	3		0.793193	1.65476		6.56982	4.08362
				6	3		0.599631	0.34407		4.00174	3.5551
				9	4		0.703973	1.43355		8.38854	4.64065
				4	4		1.44183	0.875226		5.93091	3.76009
				6	3		0.635671	0.214938		4.26802	0.741261
				17	3		0.303858	0.769933		8.33112	3.51009
				8	8		0.579268	1.54768		5.73832	15.3391
				4	13		0.581606	1.24309		3.0106	21.0529
				4	19		0.35901	1.3134		2.75245	32.7999
				4	29		0.719522	1.16219		3.32997	45.6978
				4	3		0.929796	0.657408		4.04677	2.50257
				3	3		1.23085	0.059379		3.11296	2.40021
				5	3		0.168042	0.532467		2.37969	1.39323
				4	5		0.135044	0.403526		1.17962	3.53885
				5	3		0.57649	0.190515		3.4816	1.24917
				3	4		1.16539	1.57688		4.96845	7.60198
				3	7		0.40551	2.25209		1.1099	19.0992
				3	7		0.569325	0.603503		2.80159	9.30991
				5	11		0.536544	1.95867		10.7928	26.8895
				7	3		0.798726	4.39277		10.3013	13.0781
				9	3		1.0393	1.80426		21.7084	4.9314
				7	9		0.542016	1.43611		19.1319	14.3192
				3	11		1.3721	1.24883		2.93269	15.5602
				7	3		0.356382	2.96744		3.96073	8.6505
				5	3		0.991286	2.39202		5.44376	5.02977
				4	4		1.56743	2.51342		5.74657	8.90028
				23	10		0.832222	2.69237		24.7435	28.527
				6	13		0.825674	1.99057		5.47215	28.6097
				6	27		1.86931	1.14338		10.7313	39.6522
				8	39		1.29778	1.33784		10.8175	65.5915
				5	7		0.500739	2.83026		3.87886	19.091
				3	7		2.96339	2.17832		6.79519	16.0231
				3	3		2.25889	3.57572		10.5183	8.17134
				3	9		2.04999	1.11104		4.97652	15.1507
				12	22		1.49464	1.37699		19.1197	35.7611
				7	12		0.331061	1.41979		4.80855	20.2419
				5	17		0.26936	1.41331		2.45756	33.2996
				9	33		0.730595	1.32604		7.00397	52.9805
				4	22		0.118844	1.48353		1.77769	39.3614
				7	6		0.222387	0.731584		2.63057	5.07881
				8	10		1.21477	1.66616		11.1369	19.6889
				6	16		0.863721	1.64081		5.83669	35.1508
				5	48		0.367606	1.43008		3.5226	84.5104
				3	6		1.89237	2.01608		5.91044	14.0612
				5	4		1.42737	3.93074		6.5126	13.1805
				3	6		0.5424	1.53022		3.17847	9.74007
				3	9		0.786387	0.636914		3.12923	8.60124
				4	6		1.76943	0.322714		7.1106	5.09116
				5	4		0.921597	0.229385		6.60672	3.13334
				5	5		1.22172	1.06291		13.493	7.81074
				3	3		0.675782	0.685869		5.39016	3.66173
				4	3		0.460105	0.14521		16.7892	2.50257
				5	3		1.26973	0.198637		5.99229	2.58857
				3	8		0.75984	0.255091		3.88286	6.79922
				6	4		1.38197	0.61443		8.17131	3.98538
				4	4		0.69635	0.095543		2.84684	3.41998
				6	30		0.451331	0.648286		3.97299	32.7302
				3	5		0.675898	0.99329		3.00635	5.76691
				3	3		0.649242	0.694208		1.5769	4.62825
				6	6		0.947825	0.878126		6.15622	9.06428
				8	3		0.835584	0.161766		7.38912	3.19486
				12	6		0.998338	0.924083		14.4872	9.2399
				4	8		0.806729	0.919852		4.02225	10.588
				17	5		0.537587	0.402422		12.4721	3.48973
				7	25		0.292898	1.08626		2.63784	35.3352
				5	6		0.263155	0.571779		2.15437	5.56741
				3	3		2.16268	0.786451		4.77989	4.39902
				3	10		0.534522	1.41947		2.15841	17.2395
				9	7		0.356853	0.732442		5.0134	6.85247
				9	14		1.38389	0.723389		18.7429	14.6304
				4	6		0.47514	0.164626		2.6828	2.79345
				4	4		0.580228	1.20283		3.55933	7.49134
				10	6		1.26064	0.249879		35.8516	6.49208
				8	5		0.265655	0.286723		3.7109	2.86308
				4	8		0.577634	0.784662		4.33765	9.98572
				6	4		0.235919	0.750848		3.15383	3.94024
				7	8		0.385015	0.899926		6.62307	9.98172
				4	28		0.333171	1.09437		3.48562	42.3433
				7	31		0.980962	0.766744		13.8482	36.3429
				4	15		0.147426	0.994737		3.07195	18.2513
				4	17		0.596651	0.501771		3.91574	12.8201
				3	6		0.137216	1.01989		0.471027	6.488
				3	3		0.76185	0.229382		2.8917	0.880512
				16	5		2.97086	0.430141		54.2906	4.48079
				4	4		2.89169	0.289455		12.2138	1.91281
				59	17		2.41154	1.01244		192.534	21.1471
				4	10		4.03308	0.92023		22.679	14.2823
				3	6		0.153581	1.25417		14.8188	8.48265
				4	3		5.84753	0.196621		25.8899	2.94084
				10	5		3.98026	1.1745		43.9035	9.14603
				26	15		2.3574	1.13642		81.5321	20.5121
				4	5		0.221205	0.954387		5.15267	5.8613
				3	16		4.11014	1.60555		11.7552	31.5137
				10	17		2.90445	1.03858		32.5703	21.5976
				4	12		1.02403	0.998285		4.54639	13.3198
				4	5		5.3083	1.27801		18.1692	6.9876
				5	3		4.16244	1.73867		19.5577	3.73962
				4	3		6.96843	0.122874		27.4136	1.3188
				10	12		1.65518	1.21444		20.1639	18.0997
				33	34		1.53799	0.835056		62.4332	42.8798
				3	17		2.34691	1.01143		7.72485	24.7514
				30	3		1.78635	0.299027		64.0142	1.76946
				11	3		0.724166	0.444467		10.9114	2.4902
				9	13		0.588274	0.720193		7.53228	14.7165
				22	5		0.755013	0.9		24.0715	4.00987
				10	6		1.15866	0.792957		12.8324	5.91045
				4	27		0.692237	1.07882		2.96116	37.8132
				17	15		1.03525	0.858683		21.3478	16.6989
				3	4		0.315373	1.08819		1.0198	4.31702
				6	3		0.95243	0.505824		5.6073	1.41304
				5	4		0.489389	1.48815		2.859	6.31181
				21	7		0.897004	0.615053		22.0277	6.89336
				3	23		1.665	0.499712		4.10003	15.081
				9	3		0.858062	0.569389		9.39181	3.28086
				5	3		0.887866	2.095		4.34976	5.90632
				11	4		0.826551	1.1332		11.0138	4.39089
				7	4		0.8888	0.574788		6.30769	2.87121
				4	16		0.707226	0.674718		3.19073	18.6074
				8	4		0.984205	2.04381		9.21155	7.63884
				10	15		0.974851	1.03799		11.62	23.4407
				11	11		0.794588	0.871226		11.2513	15.8798
				6	6		0.79543	1.22633		6.45521	8.94129
				10	11		1.37348	1.41556		14.4093	19.9223
				10	4		0.781858	0.584311		9.81782	3.01852
				4	6		0.346807	1.21074		2.47139	7.93787
				12	24		0.906715	0.459452		12.7383	19.4269
				4	9		0.779605	0.813494		3.04323	8.35981
				5	3		0.847824	1.15503		3.69449	3.98938
				9	4		1.43814	0.296303		14.2208	2.12156
				7	4		0.99369	0.663552		7.79034	4.3989
				9	7		1.58152	1.18916		15.9084	11.1121
				4	4		0.76186	0.66493		3.00233	4.73064
				8	5		0.652401	0.261075		7.3521	6.72961
				7	5		0.354987	1.11509		3.93212	7.86812
				26	11		0.748573	0.853732		26.0293	14.4216
				11	6		0.438691	0.311237		7.40119	9.86294
				14	3		0.79146	2.38789		12.0214	11.5791
				10	8		0.89017	0.701563		10.4036	12.4679
				4	3		0.730441	1.2288		2.49847	5.07891
				3	5		1.05266	0.321542		2.42895	12.5744
				4	12		0.495595	0.696669		3.19885	14.1103
				7	5		0.625999	0.306128		7.27025	6.56969
				11	3		1.1354	1.40486		15.5316	4.58742
				16	23		0.860708	0.632643		19.9839	25.3412
				20	3		0.682698	0.309171		22.72	1.90857
				4	10		0.308582	0.587964		1.69166	11.5914
				7	20		0.468909	0.564787		4.272	17.2395
				24	3		0.854642	1.51962		26.6396	4.145
				12	13		0.83592	0.519151		11.1121	10.5223
				4	8		0.805525	0.881803		3.98125	10.6001
				15	10		0.745779	0.841013		15.2243	10.8416
				14	58		0.515764	0.691783		12.3081	63.9696
				7	11		0.937873	0.797883		6.84021	11.9478
				8	18		0.839042	1.08035		9.23213	27.1885
				12	5		1.00609	0.261101		13.5001	2.73193
				3	4		0.708512	2.12303		1.8187	8.47852
				5	5		0.963542	1.58306		4.73894	9.43692
				12	5		0.870172	1.95171		16.7891	9.94079
				18	3		1.16325	0.468954		24.178	2.18321
				14	3		1.19096	1.3291		20.5531	4.93138
				5	6		0.273446	1.3828		3.37911	11.6896
				7	27		1.16735	0.892104		9.58016	34.7004
				7	9		0.19725	0.245762		3.52648	3.75187
				3	13		0.303155	0.955387		1.26968	16.0312
				11	7		0.314145	0.353626		7.06961	5.20991
				11	14		0.774509	0.589214		12.0213	11.4643
				7	7		0.469728	1.71959		4.25973	12.4433
				14	20		0.266805	1.03777		5.66059	26.0744
				3	7		0.503859	0.663499		1.75293	7.99092
				5	7		1.49605	0.8089		7.66749	8.42112
				6	3		0.66677	0.241626		4.68558	1.72019
				6	7		0.304694	1.02531		5.6482	9.13802
				4	19		0.416457	0.526793		3.08823	15.9411
				5	8		0.270365	1.03784		6.83203	9.89983
				4	14		0.662199	0.607784		4.17786	13.8892
				3	7		0.268314	1.28882		1.93738	11.1531
				4	9		0.526959	1.28302		4.97253	11.1122
				9	22		0.354794	0.842036		7.47858	25.1242
				6	34		0.090888	0.624127		2.58846	30.9936
				8	8		0.430084	1.08072		7.25784	9.41227
				7	13		0.516783	0.956417		10.002	16.5104
				3	3		0.63049	1.30861		2.01107	6.59023
				5	4		0.568182	0.465532		5.70968	1.84723
				12	4		0.43188	0.428698		16.5801	1.78997
				5	3		0.339942	2.05408		3.1006	13.9997
				3	4		0.309203	1.25742		4.75124	6.10285
				9	3		0.623418	0.208902		10.6821	2.20361
				5	3		0.319485	0.516077		4.65289	3.64947
				3	6		0.468992	1.25333		1.98659	9.2935
				7	5		0.337901	0.997331		3.66172	4.55864
				9	5		0.45355	1.2134		7.9214	5.94721
				12	7		0.623329	1.29226		13.1519	12.734
				8	5		0.550636	1.34651		8.55227	7.20876
				11	3		0.890922	1.75917		13.3322	6.80324
				6	7		0.641352	1.65062		6.18894	12.0705
				8	6		0.321812	1.07149		5.38203	7.47904
				4	11		0.228006	0.990806		1.13052	15.2202
				8	13		0.561145	0.761506		5.51304	15.339
				3	18		0.632826	0.817732		1.8308	25.1609
				12	5		0.558154	0.338957		8.8758	3.21116
				8	8		0.73845	0.297267		9.33855	9.60069
				9	11		0.370154	0.610277		7.13096	10.8294
				5	3		0.65735	1.43969		6.53292	4.81263
				7	3		0.478537	0.098304		4.6774	1.85952
				12	5		0.501193	0.489453		9.85883	3.8583
				4	8		0.297634	0.923333		1.51557	12.0009
				5	7		0.290784	0.888823		2.90808	9.07232
				4	4		0.483311	0.806874		2.88762	5.08708
				6	4		0.497167	0.821858		4.3499	4.22698
				17	4		0.58671	0.587072		15.1588	5.82842
				3	7		0.489459	1.03625		2.37973	9.73174
				7	7		0.464864	0.23005		6.48371	2.99816
				10	4		0.404562	0.327693		7.38895	2.0725
				11	7		1.28324	1.14959		18.0095	14.2617
				6	16		0.457108	0.852488		7.03672	27.6307
				4	10		0.503821	0.819625		14.9869	12.6194
				4	4		0.686763	0.477833		3.07599	3.46917
				8	16		0.414866	0.954102		7.15135	24.6612
				4	7		0.450547	0.258739		4.42762	2.85889
				12	3		0.547314	0.995296		10.1988	4.39898
				8	12		0.494971	0.36193		6.29942	12.1401
				7	5		0.718121	0.162806		9.13865	5.88984
				19	3		0.351101	1.61581		12.4596	4.80855
				10	7		0.335423	0.808945		6.7584	9.19932
				7	25		0.741335	0.922599		10.4405	38.9025
				3	5		0.276454	0.176115		1.38856	6.21751
				7	4		0.574131	1.32024		7.33972	15.9329
				6	5		0.42846	0.832483		6.60658	5.29184
				7	3		0.303004	0.106458		3.58798	4.58739
				6	4		0.64201	0.520192		6.26257	4.37029
				8	8		0.360388	0.793993		6.51644	12.2466
				7	22		0.707147	0.715046		7.45039	29.695
				13	5		0.545761	0.866304		11.3006	5.92673
				11	3		0.351409	0.122848		8.48248	1.91712
				9	9		0.48129	1.03626		6.63141	16.6415
				22	4		0.61438	1.54685		22.1914	7.45033
				13	7		0.596384	1.07583		10.3712	12.9184
				6	7		0.283425	1.13109		3.47735	14.8229
				4	12		0.330423	1.68935		3.28899	28.241
				3	4		0.40144	1.36665		1.60557	6.19294
				5	4		0.53247	1.79534		4.12038	9.55157
				9	3		0.508866	0.468973		8.66276	3.08415
				6	4		0.930552	0.804271		12.5415	2.95722
				3	3		0.581664	0.925651		2.11343	2.80975
				11	4		0.516521	1.36801		7.99927	8.95354
				17	4		0.47897	0.412331		14.0571	1.96189
				8	6		0.375638	0.758566		7.38901	6.53697
				12	6		0.488902	0.710228		9.36728	8.39653
				3	6		0.411558	0.588851		3.73135	4.01398
				3	8		0.219123	0.169126		1.4458	4.46854
				6	7		0.706967	0.446413		5.21027	5.27141
				6	4		0.357166	0.708621		4.91092	3.13748
				5	4		0.219101	0.102426		3.35046	1.49491
				3	7		1.13261	0.191844		3.23162	2.4902
				7	8		0.531791	0.107165		7.3521	4.4809
				13	22		0.431082	0.261192		10.4405	14.5198
				14	10		0.491215	0.182525		11.489	3.04323
				3	4		0.651213	0.339955		2.0602	1.47855
				4	5		0.860143	0.239616		3.75174	1.33119
				13	10		0.808958	0.140672		14.7821	2.53121
				17	3		1.03242	0.104512		21.8843	0.589773
				6	12		0.489083	0.175353		4.20244	5.48442
				4	9		0.832781	0.14691		4.1287	2.90798
				4	6		1.01994	0.198254		4.18187	1.91282
				6	5		0.969132	0.088096		6.11917	1.4704
				6	36		0.698796	0.290798		5.47205	18.0013
				7	8		0.807661	0.509645		7.22925	4.26788
				4	15		0.52297	0.422194		2.62945	9.23205
				6	11		0.631542	0.304337		6.00868	4.7184
				11	3		0.446058	0.149536		10.719	0.454656
				7	3		0.573427	0.36041		5.9718	1.01172
				5	7		0.497456	0.387727		4.82902	4.24741
				3	4		1.04648	0.053141		3.05972	2.51095
				21	20		0.531665	0.480323		15.2202	13.0413
				14	16		0.491161	0.217598		9.64993	6.45916
				9	7		0.768491	0.177513		8.48247	3.35863
				3	5		1.35993	0.352259		3.14972	3.51022
				13	8		0.72019	0.286698		12.1689	3.5511
				7	31		0.421195	0.392242		4.74303	18.0463
				6	5		0.44727	0.173075		6.02093	3.35859
				11	12		0.785992	0.595008		13.7908	9.12965
				10	10		0.404097	0.626219		6.80735	6.97934
				10	21		0.395476	0.601892		6.43058	16.019
				15	8		0.542394	0.167386		11.6487	2.87932
				8	4		0.286704	0.436873		7.54048	3.08823
				4	7		0.522889	0.27651		4.19	2.46982
				6	10		0.684828	0.38277		5.45979	5.16079
				4	3		1.80359	0.518106		6.86058	1.51144
				8	10		1.06901	0.788469		11.5955	8.98214
				4	6		0.770014	0.46528		2.69924	3.36273
				3	5		0.938029	0.578541		2.37971	3.35045
				4	4		0.469649	0.206208		4.14913	2.19131
				3	9		1.08341	0.294933		2.44925	4.66513
				10	3		0.73272	0.995232		8.72014	2.31423
				17	4		0.505314	0.159821		12.7219	1.71197
				8	3		0.588652	0.260141		5.91447	0.974771
				12	5		0.356342	0.175066		9.03965	2.28955
				11	4		0.455008	0.240307		7.29893	1.29842
				13	4		0.396626	1.22874		9.03951	5.84068
				3	18		0.600083	0.333219		1.99881	9.16652
				7	6		0.75296	0.149932		7.74111	1.96608
				10	4		0.971602	0.225246		10.8213	0.983002
				20	3		0.984304	0.395213		24.2312	1.13035
				7	4		0.913342	0.774029		7.58974	3.14147
				10	3		1.1	0.571386		11.1695	2.28957
				6	11		0.711857	0.369841		4.40713	5.41478
				18	7		0.900853	0.531814		17.4403	4.38251
				16	3		0.306398	0.450547		9.23617	1.31066
				4	6		0.632158	0.71841		2.10104	5.31242
				33	3		0.885567	0.124947		36.1215	0.557018
				4	4		0.733188	0.316838		2.58031	1.56055
				6	4		0.597199	2.83566		4.96015	11.4356
				3	14		1.99667	2.40712		4.40713	44.69
				10	5		1.80311	1.4223		17.3707	11.6118
				28	13		0.612076	1.10762		22.2612	24.2803
				6	10		2.31252	1.12747		12.0992	17.731
				7	3		0.679883	2.19948		6.05384	7.56909
				12	6		0.49708	0.323579		10.592	4.59149
				8	14		0.749583	1.32075		6.56984	28.032
				14	36		0.939831	1.91213		16.5024	96.0152
				3	3		0.839654	4.29247		2.40011	10.1413
				11	7		1.46593	3.59481		16.9119	25.1609
				23	20		0.783081	1.87483		27.5817	68.9292
				11	8		1.03665	1.78167		11.3004	15.5069
				22	3		1.37075	5.39219		32.7508	13.6188
				3	12		0.632762	1.76277		1.38031	27.4476
				7	10		0.606161	0.647603		6.98344	16.3752
				12	11		1.67335	3.12227		23.5226	44.1002
				10	3		1.19355	0.262118		12.4393	6.79094
				5	3		0.657389	0.554989		3.0186	4.60792
				27	14		0.957341	2.09201		31.2229	40.7825
				19	22		0.97962	1.76083		21.3191	55.7611
				4	11		0.673088	2.68197		2.75245	37.6327
				46	3		0.866778	0.19456		52.1324	9.22801
				4	24		0.421888	1.63158		3.19886	61.573
				21	9		0.755251	2.06993		20.93	27.5078
				23	4		1.02714	0.383654		27.1228	5.55803
				14	14		1.25869	1.35889		18.3782	29.0314
				4	3		0.988484	0.250112		3.4773	3.3217
				17	18		1.15556	1.5287		20.6392	40.762
					4			1.29158			10.8909
					4			0.692194			11.8904
					5			1.30243			10.0185
					5			1.36597			12.0705
					3			0.348134			6.25848
					3			0.815072			8.96171
					10			2.61908			32.9184
					4			1.57005			11.1858
					37			0.782722			41.6999
					6			0.198267			2.58858
					5			0.145434			1.3639
					20			1.0947			26.3119
					7			0.881276			9.42045
					14			0.803756			14.2494
					7			0.146752			2.03562
					3			0.165875			1.44991
					4			0.273092			1.63016
					3			0.188326			1.91681
					3			0.26832			1.71205
					8			2.00228			16.6825
					14			1.56246			28.0894
					36			0.983585			45.7425
					3			0.163782			1.21229
					10			0.622561			9.00264
					6			0.366159			3.37908
					19			1.37755			29.9899
					28			1.34103			45.2512
					5			2.21384			10.8212
					4			2.71014			10.6082
					4			2.64046			10.1701
					12			2.43853			33.07
					6			1.37867			8.87988
					13			0.688118			10.8705
					3			0.602099			1.92908
					4			0.318161			4.18198
					4			0.1488			2.60082
					3			0.059386			2.62947
					4			0.453338			2.36332
					4			1.07857			5.26728
					4			0.815066			5.57037
					4			1.12362			5.49253
					4			0.649873			4.49307
					5			1.27382			9.58847
					4			0.521459			3.67398
					5			0.580579			6.43049
					9			0.973525			13.3115
					3			0.210944			1.74893
					4			0.819187			4.14908
					12			0.537303			10.6492
					5			0.35223			3.40797
					5			0.779232			6.8278
					3			0.565248			2.19945
					5			0.27135			3.64125
					3			1.48271			5.16077
					4			1.0431			4.29249
					6			0.876518			6.68855
					5			0.488406			3.30947
					13			0.61881			12.73
					4			1.25605			7.17183
					3			1.6158			5.16078
					3			0.524256			3.44461
					3			1.98648			6.24207
					4			1.39805			6.77865
					4			1.30795			5.59087
					5			1.13864			7.84764
					3			0.778214			2.73192
					7			0.875145			8.1999
					3			0.495571			2.42889
					3			0.159725			2.007
					3			1.72641			5.69733
					6			0.561004			5.34922
					6			1.42537			10.2396
					6			1.51385			10.5223
					6			1.02559			8.49073
					4			1.05811			6.62711
					7			1.14821			10.1495
					3			0.247795			3.96891
					3			1.52777			9.19112
					3			0.872435			2.96132
					3			1.01987			5.03381
					3			1.93121			5.60723
					3			1.93946			5.31233
					9			1.47656			18.808
					3			0.116736			0.835558
					5			1.33934			8.55212
					6			1.40406			13.4221
					7			2.16125			19.7584
					3			1.04038			3.39137
					7			1.26017			12.5906
					4			0.371366			4.37028
					19			0.77002			26.6108
					5			0.255987			3.8706
					5			1.28611			9.13376
					9			0.737762			16.4899
					10			0.706297			20.0533
					3			1.06081			5.40657
					8			0.879044			11.6692
					14			0.988988			22.732
					5			1.16526			6.07825
					17			0.719844			24.5915
					14			0.84501			21.921
					4			1.00483			10.8212
					6			0.7569			9.32216
					3			0.57136			3.40366
					5			0.189424			2.65001
					6			1.15585			13.4098
					7			0.923614			8.74058
					4			0.577506			5.10755
					4			1.19054			7.74938
					5			1.02603			6.7295
					18			1.01578			30.0923
					13			0.778572			19.2382
					3			1.58101			4.43176
					6			0.191695			7.72074
					3			0.176122			5.80794
					4			1.87464			8.0975
					3			1.32708			3.8624
					3			0.32151			4.96006
					5			0.764864			4.11224
					3			0.206848			3.91158
					10			1.10859			19.0212
					11			0.979722			13.2174
					9			1.20777			14.9376
					3			1.25744			4.41943
					4			0.176119			2.89987
					8			0.920993			10.6902
					4			0.966626			6.90153
					5			0.879603			10.211
					13			0.952976			20.6185
					10			0.961587			14.7779
					11			0.372307			13.1477
					4			0.633485			3.98116
					4			0.563861			3.34223
					5			0.151536			3.28074
					3			0.749619			2.6828
					8			1.14978			11.153
					8			0.779392			9.58842
					10			0.731361			10.2397
					11			0.559482			14.4584
					6			0.921562			9.0887
					4			1.13591			5.74228
					4			0.046396			1.28205
					4			2.47257			8.19171
					4			1.49224			7.84764
					20			1.17445			35.9739
					5			1.49602			8.929
					3			1.40894			4.16139
					6			1.29591			10.0472
					6			2.12077			12.5375
					10			1.42217			15.0686
					5			0.876518			10.0676
					71			0.347688			44.092
					18			0.411939			10.8908
					6			0.119562			1.56054
					24			0.56684			17.1084
					5			0.326698			2.28129
					7			0.981711			8.1999
					17			1.53132			31.7101
					3			0.112531			0.643008
					9			0.102925			3.5675
					7			2.51557			18.972
					5			1.02497			5.73003
					3			1.21029			3.10058
					3			0.186381			1.54831
					12			0.78268			13.9136
					4			0.07782			2.91203
					12			0.841862			12.8405
					4			0.094221			1.26155
					5			0.138221			2.28143
					26			0.776416			31.3129
					3			0.434189			1.92095
					7			0.165905			2.55995
					5			0.730096			4.89051
					3			0.081805			1.35989
					4			0.088734			1.45803
					3			0.278451			1.48681
					3			0.505766			2.99008
					11			0.7336			15.4413
					5			1.10594			5.52132
					4			0.937911			4.49311
					5			0.248899			10.8294
					5			0.28256			2.09293
					6			3.2292			18.0421
					5			1.65573			7.47085
					3			0.276454			1.11818
					3			1.37626			8.18349
					4			0.233557			1.42949
					6			0.271148			2.72782
					10			0.939733			11.3497
					5			0.241622			1.62191
					5			0.369629			2.29784
					31			0.982031			34.3028
					4			0.628028			2.71162
					3			0.712653			1.85958
					5			0.368666			2.27729
					3			0.192563			0.647219
					4			1.04858			4.4275
					10			1.18643			12.308
					6			0.097426			1.45819
					3			0.385005			1.69964
					28			0.589398			28.0526
					26			0.519877			20.9013
					4			1.26154			6.25847
					4			0.623936			4.74299
					6			1.52775			14.8434
					12			1.01911			19.6192
					3			0.341971			4.13267
					7			0.845786			9.94883
					10			1.13228			15.2939
					4			1.56296			7.82307
					11			0.92198			14.0242
					4			1.27245			8.67093
					4			0.58025			4.399
					11			1.80871			29.4001
					3			0.534368			2.53965
					4			1.09225			9.01089
					7			0.954351			9.34262
					6			0.625039			7.34385
					16			0.788319			19.611
					4			2.51757			9.2812
					9			1.05264			13.6188
					25			1.05183			40.0534
					11			1.31886			22.6624
					24			0.792115			37.7721
					4			0.737254			4.39894
					23			1.12502			38.3495
					3			2.15443			6.02091
					3			0.903155			3.63713
					28			1.14351			53.5902
					7			1.22058			10.2765
					3			0.46903			1.22056
					3			1.08953			4.82081
					17			0.967657			25.5336
					5			1.10384			17.6818
					5			0.853968			11.0015
					3			0.206842			15.4496
					4			1.09905			13.7129
					20			0.947873			67.7168
					10			0.286265			19.6315
					3			1.59537			6.07832
					4			0.881967			7.70019
					6			0.379256			15.4987
					4			0.671753			7.39706
					7			0.293534			13.7867
					4			0.120128			4.77987
					3			0.215034			5.5499
					8			1.5342			20.766
					4			0.419162			4.14093
					12			0.675064			16.5718
					3			1.71615			4.39076
					4			1.14821			10.1004
					11			0.957208			14.229
					11			0.555843			27.9788
					12			1.13454			23.4528
					16			0.735076			23.1536
					3			0.313306			1.1878
					3			0.180211			1.67932
					14			0.910224			19.0211
					3			0.114701			1.4581
					30			1.16821			52.6727
					7			1.13249			10.5305
					11			0.766348			15.8223
					10			0.957547			11.3372
					11			1.18573			16.8135
					3			0.116672			1.4089
					3			0.32151			1.3188
					8			0.136353			3.03921
					7			0.080514			2.44932
					11			0.09625			3.62072
					7			0.223247			3.1785
					3			1.33524			3.62074
					8			0.089523			4.54228
					13			0.501075			9.42054
					31			0.690429			28.7202
					10			1.12226			15.0318
					3			0.086099			2.59251
					7			0.819838			7.74935
					18			0.634367			14.6836
					9			0.265742			4.18239
					5			0.209901			2.94083
					8			0.410211			5.20989
					18			0.799402			15.8591
					6			0.328492			3.66175
					6			0.223636			1.6998
					6			0.156452			2.48619
					4			0.251243			1.09354
					5			0.560042			2.74013
					5			0.493565			3.78144
					4			0.243004			1.63827
					5			0.079805			2.41245
					10			0.115137			4.3989
					8			0.192528			2.87121
					4			0.40288			2.19946
					4			0.578859			4.42764
					9			0.194019			4.46039
					4			0.352265			3.59198
					16			0.396772			11.8207
					6			0.321956			2.44922
					10			0.385913			5.63995
					9			0.346608			4.80038
					19			0.657834			18.3125
					4			0.095586			1.51957
					11			0.285068			6.67218
					3			0.40752			1.54002
					15			0.544454			11.0425
					8			0.272084			5.27141
					23			0.457046			13.5368
					5			0.58671			4.06714
					9			0.190467			4.50127
					3			0.448454			1.41734
					3			0.094144			1.33116
					6			0.598008			3.87062
					5			0.103482			1.53179
					3			0.110624			1.13042
					7			0.866246			6.47561
					6			0.125302			1.84316
					4			0.050556			0.728691
					8			0.18901			2.87933
					4			0.555631			2.85883
					4			0.570743			2.3223
					4			0.506543			1.84305
					9			0.400387			6.02918
					14			0.267198			5.70955
					3			0.133146			0.581363
					25			0.785045			24.0018
					9			0.358283			4.15734
					6			1.58431			8.90853
					6			0.315346			2.01099

## Sheet: Figure 1N-Air
-0.26407	-0.313506	-0.35951	-0.340353	-0.236025	-0.175304	-0.189302	-0.310317	-0.497367	-0.761215	-1.02033	-1.15039	-1.09253	-0.908002	-0.648425	-0.360243	-0.0693647	0.283288	0.609488	0.911441	1.08847	1.1692	1.2063	1.29962	1.45645	1.69357	1.92435	2.15096	2.32866	2.4511	2.53286	2.57853	2.48656	2.3236	2.17691	2.01994	1.87532	1.60812	1.27336	0.928148	0.693818	0.587119	0.650389	0.815353	1.00578	1.17967	1.32042	1.4631	1.61403	1.7494
-0.115755	-0.413855	-0.639776	-0.787206	-0.865409	-0.883433	-0.898079	-0.877783	-0.936415	-1.08833	-1.25762	-1.41382	-1.51952	-1.59821	-1.67594	-1.77873	-1.86315	-1.85489	-1.74648	-1.54209	-1.40115	-1.34742	-1.40596	-1.52999	-1.70601	-1.85588	-1.94171	-2.0237	-2.11877	-2.26545	-2.37277	-2.3641	-2.21349	-1.8958	-1.58043	-1.33926	-1.2543	-1.33162	-1.579	-1.90905	-2.18198	-2.28039	-2.19968	-1.99239	-1.72422	-1.5363	-1.45307	-1.51761	-1.66355	-1.87155
-0.263202	-0.110121	-0.0134769	0.0162545	-0.0147629	-0.0322194	-0.0683502	-0.156298	-0.270204	-0.426322	-0.605831	-0.734824	-0.745114	-0.686384	-0.599927	-0.560811	-0.613226	-0.729648	-0.838962	-0.872585	-0.860744	-0.831039	-0.780493	-0.731554	-0.726495	-0.773703	-0.915718	-1.09237	-1.28232	-1.47707	-1.59289	-1.63268	-1.61567	-1.55888	-1.50901	-1.50207	-1.52723	-1.60428	-1.68405	-1.76363	-1.88295	-2.00299	-2.11446	-2.18908	-2.20528	-2.15445	-2.01195	-1.71804	-1.34753	-0.995524
-1.22744	-1.27158	-1.27436	-1.19388	-1.01463	-0.73783	-0.44854	-0.29012	-0.281269	-0.335646	-0.414137	-0.411382	-0.325926	-0.190049	-0.136654	-0.183039	-0.226273	-0.25428	-0.240558	-0.219493	-0.231249	-0.288563	-0.393919	-0.464832	-0.431374	-0.257253	-0.021936	0.171142	0.244008	0.183505	0.0428616	-0.100921	-0.202611	-0.275738	-0.324306	-0.342006	-0.267799	-0.0709733	0.251375	0.541422	0.735605	0.700756	0.433235	0.0723782	-0.291407	-0.558782	-0.707299	-0.704131	-0.68112	-0.652893
-0.292611	-0.321763	-0.301424	-0.275502	-0.190829	-0.125146	-0.0948747	-0.168287	-0.337887	-0.529725	-0.688905	-0.744813	-0.717244	-0.616436	-0.477048	-0.327333	-0.213032	-0.124854	-0.0531891	0.00406415	0.0233968	0.0427296	0.0102288	-0.0354837	-0.0490542	0.054897	0.218807	0.432246	0.646188	0.800969	0.884274	0.849644	0.799849	0.740425	0.693669	0.686704	0.7105	0.721101	0.714208	0.700325	0.69173	0.701305	0.62737	0.554291	0.417408	0.239643	0.109593	0.063159	0.086647	0.162899
-0.376966	-0.187207	0.0118791	0.166227	0.271161	0.226349	0.060209	-0.199717	-0.509903	-0.765104	-0.899591	-0.872141	-0.752474	-0.649981	-0.634663	-0.683748	-0.768959	-0.764793	-0.605881	-0.350967	-0.0881369	0.14851	0.355278	0.535961	0.725907	0.884784	1.00556	1.10144	1.14234	1.13127	1.10403	1.07525	1.03054	1.0357	1.00447	0.95441	0.881599	0.772729	0.659965	0.60756	0.515702	0.402353	0.308013	0.29685	0.357602	0.41857	0.390472	0.236893	0.0324144	-0.0476264
-1.18914	-1.2632	-1.32891	-1.38649	-1.36923	-1.32382	-1.25849	-1.21243	-1.18106	-1.10641	-0.95533	-0.785603	-0.598985	-0.417859	-0.275819	-0.179481	-0.0865666	-0.0124869	0.020056	0.0136505	-0.0281734	-0.0959896	-0.16897	-0.304841	-0.564557	-0.959991	-1.4195	-1.8757	-2.18651	-2.2448	-2.14493	-1.97839	-1.83753	-1.76054	-1.75236	-1.85218	-2.00021	-2.12204	-2.1817	-2.13015	-2.00565	-1.91389	-1.93091	-1.9988	-1.97753	-1.81688	-1.52187	-1.16314	-0.870704	-0.685265
-0.562842	-0.415953	-0.264332	-0.140044	-0.116133	-0.221566	-0.409079	-0.62175	-0.811474	-0.940488	-1.04122	-1.06913	-1.04141	-0.917971	-0.772818	-0.751293	-0.861413	-1.02572	-1.10685	-1.05478	-0.935403	-0.803001	-0.722431	-0.68755	-0.680898	-0.685357	-0.673097	-0.649626	-0.590664	-0.491278	-0.350699	-0.175192	-0.0100489	0.123343	0.188864	0.197801	0.178064	0.0473516	-0.174683	-0.438376	-0.679345	-0.86603	-0.916123	-0.804515	-0.563437	-0.328975	-0.262163	-0.344012	-0.54314	-0.741247
-0.158216	-0.110955	-0.0166855	0.048688	0.133404	0.233698	0.3469	0.466576	0.586541	0.675873	0.648675	0.54672	0.408028	0.324189	0.232944	0.188989	0.144022	0.108034	0.106194	0.167088	0.310838	0.408534	0.462891	0.491382	0.552055	0.663184	0.703788	0.731085	0.658162	0.559112	0.504821	0.49402	0.423289	0.307206	0.11488	-0.083323	-0.150014	-0.125595	-0.0349752	0.0306446	0.107903	0.175127	0.235343	0.270664	0.276744	0.266719	0.266947	0.232088	0.183596	0.118415
0.276952	0.311934	0.401459	0.489441	0.517125	0.486482	0.374791	0.213762	0.133476	0.123169	0.106372	0.0354473	-0.0740705	-0.15603	-0.239159	-0.308845	-0.33125	-0.283596	-0.183473	-0.0452311	0.0870776	0.112013	0.0311875	-0.0844845	-0.193536	-0.33603	-0.483548	-0.642829	-0.748131	-0.820866	-0.860763	-0.912366	-0.997142	-1.10907	-1.29048	-1.4893	-1.64694	-1.70616	-1.71246	-1.70545	-1.73117	-1.84514	-1.99086	-2.10629	-2.11819	-1.94276	-1.63223	-1.29807	-1.03901	-0.919668
-0.18943	-0.202071	-0.253842	-0.336758	-0.35947	-0.35237	-0.291315	-0.277872	-0.297459	-0.303676	-0.3147	-0.358235	-0.380608	-0.428837	-0.495895	-0.61456	-0.736228	-0.746701	-0.633328	-0.488827	-0.402674	-0.487513	-0.608601	-0.678813	-0.715656	-0.69934	-0.651152	-0.611322	-0.512854	-0.38857	-0.337095	-0.365758	-0.519125	-0.622097	-0.683113	-0.659736	-0.552544	-0.458734	-0.452836	-0.569686	-0.765915	-1.02213	-1.29231	-1.52958	-1.6619	-1.70786	-1.75467	-1.83103	-1.98354	-2.13659
-1.02969	-0.934847	-0.826992	-0.74102	-0.618804	-0.490859	-0.341641	-0.223368	-0.107319	0.0790171	0.233478	0.37289	0.39785	0.317398	0.126663	-0.103659	-0.32937	-0.529374	-0.672474	-0.782579	-0.817706	-0.807207	-0.758897	-0.692516	-0.622316	-0.556354	-0.417481	-0.165609	0.138495	0.47855	0.759321	0.947902	0.980032	0.89206	0.743709	0.565447	0.357703	0.0901277	-0.207849	-0.484398	-0.6548	-0.6736	-0.572583	-0.450793	-0.331409	-0.293154	-0.378665	-0.499628	-0.625593	-0.716289
0.827639	0.77264	0.716775	0.730533	0.832142	1.0012	1.1643	1.20623	1.13306	0.941722	0.699354	0.387363	0.0863596	-0.137635	-0.23829	-0.20685	-0.175442	-0.201408	-0.285769	-0.403966	-0.507617	-0.589979	-0.577109	-0.457914	-0.274636	-0.0241928	0.187677	0.266113	0.202289	0.111394	0.0352242	0.00466529	-0.0441912	-0.106146	-0.193394	-0.246909	-0.261169	-0.266322	-0.320147	-0.348628	-0.323428	-0.269304	-0.178443	-0.0755992	0.00754812	0.0498254	0.199619	0.357831	0.521335	0.542789
-0.229514	-0.0414262	0.131781	0.267738	0.250318	0.123936	-0.0211698	-0.102635	-0.137815	-0.199397	-0.365324	-0.669312	-1.02943	-1.27688	-1.31949	-1.16235	-0.891025	-0.577687	-0.32724	-0.232053	-0.196686	-0.177212	-0.0649683	0.0521386	0.0889044	0.0506226	-0.0415804	-0.097884	-0.176891	-0.278325	-0.37405	-0.451474	-0.477691	-0.389004	-0.133557	0.192039	0.510488	0.76865	0.897532	0.962291	0.954883	0.940513	0.877756	0.802692	0.697387	0.607732	0.525934	0.451285	0.44432	0.547222
0.420587	0.422593	0.370532	0.334068	0.246417	0.195508	0.218329	0.266951	0.350188	0.435523	0.542354	0.682931	0.874968	1.04715	1.16173	1.1378	0.938411	0.651913	0.353848	0.146761	0.1239	0.265109	0.433021	0.547766	0.630105	0.716155	0.797779	0.889111	1.00067	1.11969	1.27514	1.39976	1.54463	1.62196	1.61365	1.57182	1.46772	1.35228	1.30391	1.28298	1.30186	1.36068	1.40455	1.42187	1.34108	1.16543	0.948889	0.651937	0.449368	0.379527
-0.746868	-0.537839	-0.336368	-0.159563	-0.0825031	-0.097254	-0.10868	-0.194069	-0.27759	-0.36729	-0.40548	-0.40613	-0.376032	-0.405073	-0.419202	-0.433085	-0.428635	-0.304343	-0.201579	-0.158672	-0.226566	-0.277408	-0.306707	-0.271141	-0.191413	-0.0953003	0.00550117	0.0780084	0.161092	0.25418	0.374694	0.435903	0.460879	0.453735	0.469286	0.49781	0.591786	0.723439	0.85154	0.918459	0.89926	0.850616	0.783762	0.714987	0.607622	0.47325	0.339158	0.248354	0.198387	0.153168
-0.304217	-0.241001	-0.260927	-0.380858	-0.662296	-0.961308	-1.20868	-1.33371	-1.36275	-1.32799	-1.2574	-1.13814	-0.943957	-0.74387	-0.612476	-0.626959	-0.687579	-0.744993	-0.826777	-0.941676	-1.05039	-1.11863	-1.11079	-1.04486	-0.942121	-0.791909	-0.595229	-0.305498	-0.0321062	0.105304	0.0600934	-0.0774533	-0.149423	-0.0313889	0.267858	0.558254	0.737605	0.784202	0.79551	0.850871	0.936735	0.974258	0.94531	0.913029	0.962464	1.06001	1.19732	1.31207	1.34049	1.2858
-0.512393	-0.393284	-0.362286	-0.44064	-0.580651	-0.760658	-0.931839	-0.981462	-0.957661	-0.894179	-0.817546	-0.733813	-0.676323	-0.686032	-0.783258	-0.901482	-0.968628	-0.944602	-0.799228	-0.607095	-0.426454	-0.284345	-0.227956	-0.247521	-0.349979	-0.447843	-0.539844	-0.566053	-0.492978	-0.382725	-0.245396	-0.152684	-0.0951919	-0.0364352	-0.0237327	-0.069585	-0.207147	-0.449316	-0.657228	-0.666353	-0.547305	-0.347623	-0.145121	-0.0399797	-0.0342536	-0.098913	-0.180647	-0.322765	-0.538309	-0.774049
-1.07493	-0.972477	-0.837942	-0.70225	-0.582532	-0.52263	-0.500886	-0.52074	-0.491453	-0.493673	-0.54539	-0.599272	-0.568672	-0.470796	-0.348449	-0.27528	-0.243328	-0.231571	-0.194681	-0.147771	-0.0489454	-0.033709	-0.0905933	-0.150105	-0.194543	-0.218009	-0.242875	-0.272268	-0.25273	-0.200748	-0.119813	0.0389803	0.209226	0.304516	0.295134	0.237516	0.124668	-0.00274884	-0.078726	-0.0702748	-0.0116512	0.102964	0.199429	0.288123	0.366086	0.438347	0.47914	0.417507	0.325849	0.236071
0.751537	0.601398	0.423087	0.244517	0.107316	0.0487611	0.0783023	0.212963	0.409516	0.569898	0.580247	0.488271	0.321534	0.228512	0.236813	0.30386	0.362915	0.40387	0.453168	0.495737	0.586139	0.614794	0.620966	0.581946	0.486321	0.368036	0.284521	0.267373	0.338321	0.472031	0.589683	0.693713	0.690601	0.588845	0.476172	0.335584	0.199605	0.116814	0.0426576	0.0290316	0.0932052	0.243942	0.441871	0.603815	0.714581	0.734373	0.70263	0.581159	0.390049	0.158374
-0.406647	-0.478884	-0.625742	-0.834067	-1.05475	-1.21172	-1.22366	-1.11431	-0.943931	-0.749571	-0.557605	-0.433815	-0.351922	-0.334916	-0.358473	-0.480005	-0.609696	-0.658748	-0.610898	-0.491004	-0.41288	-0.449873	-0.584091	-0.766382	-0.86974	-0.805494	-0.674391	-0.599908	-0.578497	-0.62606	-0.630498	-0.608557	-0.593985	-0.638951	-0.726059	-0.760695	-0.80827	-0.878422	-1.00849	-1.11294	-1.18159	-1.19564	-1.15556	-1.07382	-1.00454	-0.989398	-0.942568	-0.825593	-0.701495	-0.61565
0.0928837	-0.113421	-0.252685	-0.231694	-0.0735282	0.143231	0.314696	0.436808	0.489297	0.51489	0.538726	0.548749	0.511852	0.393475	0.201905	0.0457312	-0.108239	-0.177375	-0.163596	-0.0714796	0.0620828	0.147475	0.163146	0.0630816	-0.0281925	-0.0975244	-0.0712951	0.0241837	0.115094	0.142227	0.147598	0.174816	0.228347	0.279527	0.306887	0.267298	0.195237	0.161411	0.198985	0.338062	0.508185	0.657359	0.663528	0.582154	0.478204	0.408903	0.374455	0.421344	0.499269	0.531219
0.446685	0.245777	0.122773	0.109978	0.184189	0.235754	0.150371	-0.0723783	-0.370208	-0.630228	-0.796437	-0.831602	-0.737044	-0.567926	-0.439219	-0.375723	-0.448321	-0.594209	-0.715658	-0.78019	-0.764498	-0.675965	-0.560861	-0.404397	-0.189294	0.0875135	0.369021	0.621337	0.810778	0.9399	1.0034	1.03854	1.03685	1.00109	0.943016	0.912774	0.924621	0.937901	0.987902	1.02814	0.993446	0.903042	0.792765	0.691781	0.579913	0.495256	0.483577	0.585042	0.715914	0.953242
1.32496	1.16597	1.04475	0.93298	0.800501	0.666248	0.488882	0.34893	0.26383	0.230663	0.18078	0.0588278	-0.175584	-0.413634	-0.542987	-0.552398	-0.414762	-0.204685	-0.070489	-0.0256463	-0.122376	-0.314375	-0.504681	-0.709651	-0.896475	-0.989904	-0.979317	-0.893086	-0.743401	-0.659662	-0.660648	-0.702929	-0.76781	-0.798241	-0.698159	-0.559937	-0.449325	-0.443018	-0.529409	-0.662209	-0.789829	-0.815168	-0.762587	-0.668127	-0.633296	-0.637522	-0.696078	-0.767878	-0.844056	-0.878473
-0.789332	-0.98834	-1.20645	-1.39366	-1.50841	-1.47194	-1.34714	-1.18656	-1.08393	-1.09174	-1.20454	-1.41923	-1.57971	-1.64901	-1.63522	-1.60264	-1.58616	-1.59819	-1.62609	-1.67573	-1.71596	-1.73868	-1.71247	-1.54921	-1.33757	-1.11096	-0.975346	-0.919155	-0.974415	-1.06164	-1.15091	-1.23025	-1.31474	-1.41651	-1.52073	-1.61961	-1.66202	-1.64968	-1.64326	-1.66435	-1.73591	-1.77671	-1.73918	-1.66827	-1.64304	-1.65717	-1.66503	-1.6001	-1.43898	-1.20089
0.0142464	-0.139235	-0.246898	-0.369976	-0.467235	-0.54894	-0.679641	-0.808581	-0.871398	-0.776866	-0.712024	-0.730831	-0.838768	-0.937096	-0.965671	-0.859138	-0.641116	-0.500193	-0.521384	-0.69402	-0.886386	-0.964279	-0.90871	-0.752226	-0.615274	-0.589243	-0.690085	-0.830978	-0.94425	-0.974801	-0.940732	-0.878787	-0.765659	-0.618137	-0.454504	-0.379002	-0.408184	-0.494545	-0.607259	-0.712697	-0.806318	-0.875401	-0.940085	-0.99163	-1.09856	-1.12819	-1.08124	-0.922766	-0.686166	-0.481522
0.0207139	0.144282	0.310852	0.449823	0.550159	0.516795	0.432581	0.292301	0.115281	-0.0753833	-0.238451	-0.292328	-0.195583	-0.0623471	0.0411337	0.0673512	-0.00293228	0.0120992	0.139759	0.29902	0.429803	0.494189	0.414757	0.2967	0.169169	0.13789	0.2163	0.319201	0.429849	0.499343	0.485377	0.395952	0.290664	0.215508	0.209369	0.287099	0.404536	0.437947	0.343429	0.19094	0.102958	0.089706	0.224752	0.394445	0.561631	0.650318	0.660666	0.65406	0.615168	0.511525
0.535628	0.344139	0.193616	0.0868646	0.0273396	0.0755162	0.219892	0.462295	0.75425	0.900567	0.849841	0.57117	0.209397	-0.132794	-0.350875	-0.40792	-0.331765	-0.185477	0.0199669	0.309825	0.645112	0.86064	0.933637	0.854083	0.651242	0.380169	0.128857	-0.0059011	0.0415838	0.211397	0.400391	0.585778	0.702728	0.740237	0.639585	0.443741	0.175834	-0.0152282	-0.0987346	-0.0324892	0.167372	0.403433	0.639803	0.77343	0.831464	0.772183	0.698433	0.599621	0.523877	0.42875
0.551054	0.570312	0.551067	0.47059	0.320358	0.172025	0.0300261	-0.063406	-0.12464	-0.164836	-0.260558	-0.354902	-0.37164	-0.290981	-0.0740049	0.168846	0.397183	0.475563	0.374779	0.146566	-0.0909515	-0.242057	-0.296659	-0.288824	-0.266487	-0.175267	-0.125461	-0.13131	-0.191616	-0.318247	-0.46944	-0.611994	-0.630826	-0.507402	-0.310735	-0.158601	-0.0747131	-0.159722	-0.347979	-0.608057	-0.883346	-1.07137	-1.02514	-0.794581	-0.479224	-0.219757	-0.0870544	-0.115527	-0.278586	-0.464944
0.660612	0.304655	0.0194101	-0.158912	-0.201461	-0.0955534	0.0146777	0.11388	0.141999	0.125645	0.111968	0.104463	0.0433262	-0.0874329	-0.168267	-0.233573	-0.247633	-0.281551	-0.281031	-0.322602	-0.372453	-0.444632	-0.484962	-0.420072	-0.271267	-0.044007	0.138115	0.240364	0.244222	0.233829	0.188642	0.120258	-0.00848422	-0.191025	-0.358486	-0.457901	-0.49718	-0.516938	-0.554859	-0.607893	-0.709608	-0.791473	-0.812318	-0.820553	-0.781473	-0.698816	-0.596524	-0.454867	-0.299534	-0.129266
-0.870609	-0.936642	-1.00873	-1.02101	-0.970667	-0.880736	-0.745127	-0.557596	-0.382513	-0.306293	-0.317134	-0.404538	-0.559974	-0.696405	-0.794162	-0.770141	-0.734949	-0.699489	-0.69439	-0.739474	-0.840335	-0.907962	-0.839845	-0.648541	-0.371591	-0.165823	-0.152143	-0.376444	-0.706554	-0.953547	-1.00717	-0.830477	-0.50094	-0.232614	-0.101493	-0.102287	-0.155907	-0.265324	-0.336548	-0.404735	-0.481909	-0.566396	-0.547899	-0.352032	-0.0107151	0.375701	0.643487	0.731024	0.651623	0.510311
0.6114	0.858801	1.09333	1.30365	1.42401	1.38698	1.19264	0.922891	0.71042	0.576542	0.519347	0.462444	0.415751	0.304883	0.192422	0.0949384	0.0228677	-0.0666008	-0.232215	-0.403592	-0.538431	-0.529108	-0.375173	-0.17268	-0.0611279	-0.0637793	-0.136283	-0.213792	-0.199686	-0.133752	-0.025743	0.0885345	0.1585	0.231678	0.341295	0.351304	0.247547	0.095224	0.0110934	0.108664	0.313443	0.483355	0.575539	0.519939	0.384467	0.189055	0.000425564	-0.134961	-0.221081	-0.278638
0.182534	0.348858	0.417692	0.476836	0.521452	0.582777	0.65541	0.683174	0.633237	0.582068	0.578438	0.667617	0.740362	0.706847	0.521168	0.242599	0.00420333	-0.122587	-0.128151	-0.0733163	-0.0230641	-0.0178129	-0.0436906	-0.0754305	-0.104934	-0.138287	-0.150192	-0.24967	-0.372726	-0.544216	-0.680122	-0.759995	-0.728725	-0.57506	-0.412712	-0.307986	-0.22966	-0.184065	-0.174294	-0.191272	-0.24223	-0.291107	-0.351045	-0.39056	-0.364906	-0.302657	-0.224423	-0.178931	-0.176001	-0.224172
-0.298838	-0.255046	-0.231586	-0.193246	-0.12355	0.0496226	0.202976	0.231779	0.156667	-0.0322123	-0.179839	-0.221093	-0.112718	0.0228302	0.0937392	0.0400001	-0.0523155	-0.0912529	-0.0264959	0.171088	0.374702	0.507422	0.482819	0.357895	0.221957	0.192339	0.301239	0.493516	0.656177	0.675532	0.574593	0.434703	0.299899	0.206405	0.168191	0.109415	0.0331612	-0.047303	-0.107969	-0.124012	-0.111375	-0.0708459	-0.0218182	0.00851217	0.0263256	0.0906072	0.110498	0.0595195	-0.0881779	-0.301751
-0.714436	-0.542643	-0.339809	-0.0960721	0.147939	0.350889	0.429269	0.409899	0.273999	0.0749159	-0.0423241	-0.0541893	-0.0274281	-0.00440334	-0.0318684	-0.0399195	0.00290281	0.0823814	0.14326	0.155262	0.0691217	-0.144992	-0.461808	-0.76892	-0.910868	-0.823839	-0.593826	-0.361048	-0.234078	-0.267953	-0.35358	-0.405294	-0.40998	-0.322325	-0.203521	-0.154863	-0.142942	-0.134723	-0.133671	-0.172185	-0.281266	-0.458987	-0.590365	-0.659152	-0.6175	-0.50567	-0.419872	-0.367051	-0.340776	-0.343319
-0.637894	-0.465254	-0.28166	-0.0474782	0.15511	0.285662	0.304262	0.191667	-0.00232292	-0.253395	-0.491775	-0.611031	-0.591308	-0.503091	-0.341132	-0.22706	-0.168237	-0.143793	-0.129396	-0.0842221	-0.020778	0.0536254	0.120975	0.182748	0.236593	0.283881	0.267734	0.202585	0.104488	-0.0181238	-0.172596	-0.287538	-0.326747	-0.31787	-0.290724	-0.299072	-0.287898	-0.281431	-0.306365	-0.473741	-0.739579	-1.00713	-1.13518	-1.12315	-0.986585	-0.731503	-0.427088	-0.145473	0.136186	0.377769
-0.50579	-0.562082	-0.646423	-0.674488	-0.68041	-0.598142	-0.402678	-0.127925	0.150068	0.328005	0.408325	0.44447	0.501799	0.613538	0.769502	0.873454	0.875538	0.773672	0.61236	0.489727	0.466958	0.588637	0.778074	0.903434	0.826087	0.508958	0.0967567	-0.217862	-0.371426	-0.291712	-0.0409773	0.184466	0.330138	0.338408	0.330595	0.339602	0.369869	0.438363	0.499486	0.549979	0.548193	0.520008	0.465721	0.390756	0.288108	0.0999647	-0.133506	-0.290515	-0.339137	-0.319942
0.0550305	-0.0323483	-0.0696798	-0.0418883	0.0818962	0.234151	0.28873	0.2508	0.186753	0.147686	0.114821	0.042561	-0.114507	-0.26745	-0.390843	-0.464586	-0.354404	-0.171958	0.0240677	0.219164	0.392007	0.546945	0.692864	0.857032	1.03281	1.14964	1.18345	1.12383	1.02994	0.984866	1.00472	1.0539	1.03003	0.901334	0.631659	0.26576	-0.0849538	-0.318407	-0.39312	-0.395951	-0.351739	-0.295476	-0.14432	0.0925421	0.39034	0.682197	0.953373	1.17273	1.32475	1.32992
0.0992104	0.0154475	-0.0901343	-0.237299	-0.449163	-0.715045	-0.991846	-1.179	-1.24616	-1.24524	-1.25136	-1.29199	-1.35168	-1.43174	-1.55704	-1.70901	-1.78267	-1.82871	-1.74981	-1.55378	-1.24862	-0.892469	-0.557197	-0.38245	-0.240905	-0.163062	-0.104907	-0.0135947	-0.0212647	-0.0781262	-0.188507	-0.320206	-0.43305	-0.46952	-0.482476	-0.403707	-0.363365	-0.362931	-0.469326	-0.670585	-0.880294	-1.04766	-1.12101	-1.0661	-0.907189	-0.768839	-0.683363	-0.690147	-0.758612	-0.88336
0.162452	0.0363717	-0.0186851	-0.0393488	-0.0360784	-0.0615062	-0.123128	-0.189732	-0.269809	-0.325801	-0.399745	-0.522878	-0.648997	-0.683638	-0.676998	-0.600758	-0.482222	-0.291207	-0.00712047	0.235446	0.425348	0.487316	0.449643	0.354499	0.311485	0.389538	0.512841	0.579303	0.545993	0.437101	0.255066	0.0863285	-0.0889925	-0.279898	-0.460056	-0.503444	-0.448841	-0.365617	-0.312173	-0.32873	-0.378745	-0.425146	-0.418516	-0.276175	-0.0806007	0.0212613	-0.0361591	-0.190255	-0.345348	-0.411848
0.278615	0.235126	0.236428	0.242045	0.297626	0.367283	0.436342	0.518462	0.570308	0.593617	0.603992	0.620117	0.585747	0.56805	0.583141	0.659482	0.778154	0.931341	1.11372	1.32665	1.41983	1.26616	0.866026	0.317746	-0.176677	-0.482488	-0.558951	-0.371829	-0.0331112	0.395978	0.792571	1.0457	1.11937	0.998896	0.726437	0.425749	0.27355	0.304748	0.442891	0.455647	0.318552	0.023739	-0.292709	-0.52715	-0.64673	-0.702522	-0.735219	-0.790907	-0.936674	-0.990547
0.0294823	-0.139834	-0.260103	-0.319317	-0.325058	-0.320994	-0.26255	-0.112459	0.0951324	0.232185	0.365411	0.46677	0.499212	0.454986	0.329033	0.167822	-0.0662336	-0.292866	-0.44677	-0.518568	-0.478685	-0.310886	-0.00887326	0.345113	0.563243	0.580111	0.440669	0.285569	0.235468	0.26487	0.381007	0.513089	0.597357	0.677733	0.735103	0.724035	0.621733	0.448473	0.263219	0.114075	0.0390068	0.0336992	0.0880039	0.119954	0.140211	0.18533	0.249357	0.348201	0.461067	0.597655
0.400745	0.504277	0.665174	0.862629	1.09702	1.26662	1.3344	1.31685	1.23829	1.13393	1.07854	1.01309	0.901367	0.76437	0.666619	0.636317	0.615511	0.539379	0.343606	0.0677971	-0.189512	-0.334377	-0.355972	-0.208376	-0.0105505	0.164288	0.232952	0.217707	0.121967	0.0137752	-0.0350408	0.0119579	0.142104	0.263015	0.375967	0.472888	0.566149	0.620123	0.672278	0.705356	0.668867	0.58624	0.527787	0.472278	0.354273	0.228165	0.139788	0.147108	0.214638	0.31147
-0.0293631	0.0334225	0.133364	0.233868	0.311122	0.312429	0.254585	0.142939	0.0225004	-0.0837502	-0.176778	-0.242803	-0.270334	-0.242763	-0.189731	-0.196474	-0.206264	-0.114398	0.121849	0.384194	0.600973	0.664383	0.562022	0.327616	0.0815582	-0.0923133	-0.128773	-0.0582801	0.0741656	0.212713	0.315368	0.348729	0.340585	0.288157	0.249773	0.211878	0.170974	0.152367	0.114493	0.0824952	0.0723671	0.135683	0.234757	0.312431	0.305275	0.268755	0.207541	0.14132	0.101007	0.102502
0.698005	0.684174	0.649343	0.584286	0.494715	0.388696	0.209868	0.0787322	-0.00644505	-0.0167409	0.010459	0.0694901	0.158954	0.326593	0.568019	0.874031	1.18386	1.37419	1.41512	1.35829	1.24614	1.09362	0.911516	0.721576	0.482988	0.199633	0.0333041	0.0723831	0.265363	0.452533	0.555008	0.516618	0.49204	0.542031	0.72775	0.925106	1.08928	1.14347	1.12225	0.984581	0.780715	0.608372	0.477163	0.386183	0.284743	0.151534	0.0890055	0.117137	0.195576	0.377852
0.358606	0.259653	0.0972237	0.00679629	-0.0680885	0.0167544	0.208304	0.438104	0.642513	0.807999	0.903295	0.970309	1.06334	1.10579	1.06381	0.94849	0.825	0.749661	0.742795	0.765857	0.725607	0.60586	0.440671	0.264475	0.10259	-0.102337	-0.342618	-0.579088	-0.739843	-0.791052	-0.68747	-0.540804	-0.410179	-0.380102	-0.43486	-0.501765	-0.577901	-0.595345	-0.584081	-0.497994	-0.372159	-0.339291	-0.413516	-0.488304	-0.538903	-0.434185	-0.275765	-0.184822	-0.202028	-0.330036
-0.704467	-0.795852	-0.849317	-0.856659	-0.891924	-0.888027	-0.845609	-0.738424	-0.623088	-0.487803	-0.377829	-0.291562	-0.222485	-0.156647	-0.101637	-0.0705715	-0.0202456	0.0684559	0.212561	0.352592	0.464707	0.508737	0.47074	0.376579	0.246588	0.148951	0.0729455	-0.0282075	-0.0842315	-0.143413	-0.209088	-0.318716	-0.346998	-0.340432	-0.247986	-0.0703429	0.141111	0.384818	0.556298	0.648368	0.565299	0.435528	0.250488	0.0791782	-0.0222186	-0.0661775	0.0477284	0.261291	0.52174	0.667926
-0.0807039	-0.0741568	-0.113773	-0.179146	-0.269593	-0.331574	-0.309819	-0.255191	-0.123055	0.0352855	0.205987	0.34863	0.394144	0.331002	0.150323	-0.026014	-0.161619	-0.167857	-0.141655	-0.0666134	0.0378677	0.201658	0.364205	0.468973	0.467597	0.398627	0.344637	0.355608	0.4242	0.505059	0.496447	0.348956	0.117258	-0.130031	-0.312057	-0.417568	-0.399154	-0.272429	-0.0921108	0.0191877	0.0198867	-0.109989	-0.295674	-0.432153	-0.51743	-0.565195	-0.567149	-0.526363	-0.449689	-0.287183
0.203133	0.257946	0.379698	0.509133	0.558689	0.525104	0.424613	0.289753	0.113355	-0.0529433	-0.173333	-0.166648	-0.121258	-0.00171753	0.126326	0.268779	0.422203	0.577013	0.821089	1.02094	1.11959	1.05741	0.865841	0.649855	0.457004	0.33328	0.276224	0.320452	0.341818	0.315538	0.14738	-0.0707286	-0.287099	-0.402474	-0.345996	-0.156929	0.0630573	0.2488	0.373585	0.456107	0.48969	0.434472	0.313959	0.157317	0.0451482	0.0907957	0.240372	0.430045	0.55328	0.547476
0.652661	0.698589	0.708347	0.659179	0.561441	0.446502	0.36867	0.255991	0.163964	0.0959892	0.0201218	-0.0790059	-0.175623	-0.249706	-0.281776	-0.231676	-0.130274	-0.0515001	-0.0501785	-0.08222	-0.0622108	0.048292	0.214448	0.308044	0.299838	0.18171	0.0744709	-0.00201579	-0.0414276	-0.0763294	-0.0724821	-0.0378881	0.0607949	0.230821	0.355908	0.356729	0.190087	-0.0591833	-0.241416	-0.346644	-0.342159	-0.259381	-0.202595	-0.15569	-0.142521	-0.0165979	0.182768	0.349422	0.357431	0.202334
-1.16047	-0.982481	-0.68926	-0.345183	0.0196119	0.208558	0.160341	-0.0564527	-0.374239	-0.612365	-0.810973	-0.886875	-0.864909	-0.751941	-0.661451	-0.64603	-0.761406	-0.892557	-0.915628	-0.879793	-0.731688	-0.574857	-0.433887	-0.369924	-0.356163	-0.318258	-0.216119	-0.0418263	0.196996	0.449735	0.650189	0.691219	0.6315	0.451552	0.225145	0.0395734	-0.0027377	0.119898	0.293261	0.341449	0.21614	-0.0724156	-0.371904	-0.583482	-0.713339	-0.740276	-0.764523	-0.779657	-0.750363	-0.753623
-0.261282	-0.309449	-0.262568	-0.180306	-0.0950069	0.0196474	0.0722244	0.0141609	-0.196505	-0.559632	-0.936407	-1.20766	-1.15863	-0.789036	-0.268396	0.111051	0.206713	0.0301922	-0.222411	-0.377286	-0.405208	-0.343326	-0.259603	-0.224569	-0.247173	-0.263297	-0.203011	-0.0923641	0.0317853	0.135867	0.185737	0.194117	0.219075	0.261218	0.294181	0.230629	0.099108	-0.0360973	-0.0907491	-0.104081	-0.0604445	-0.0674885	-0.16083	-0.309668	-0.452717	-0.520361	-0.495193	-0.452124	-0.446629	-0.419145
-0.549539	-0.573403	-0.562574	-0.542053	-0.547819	-0.511291	-0.398479	-0.192728	0.0388212	0.234767	0.392223	0.442454	0.426428	0.362958	0.30364	0.231015	0.159055	0.104127	0.116517	0.177405	0.250704	0.336789	0.363334	0.340336	0.306933	0.323955	0.328128	0.261195	0.184041	0.100451	0.0119926	-0.0221689	0.0155982	0.0976127	0.187475	0.194475	0.0985113	-0.108697	-0.38411	-0.663315	-0.869218	-0.944497	-0.917772	-0.80509	-0.562302	-0.297422	-0.133528	-0.0807313	-0.152467	-0.324764
-0.82307	-0.600863	-0.33866	-0.120597	0.109948	0.259131	0.383794	0.440741	0.446748	0.441442	0.412591	0.381314	0.390749	0.497549	0.645351	0.796327	0.829774	0.786513	0.685985	0.638064	0.71489	0.915255	1.1658	1.27959	1.25119	1.14164	1.01942	0.922148	0.830435	0.754998	0.672067	0.626891	0.586397	0.493598	0.376627	0.25588	0.1865	0.200712	0.311436	0.451084	0.604224	0.735129	0.910468	1.07517	1.17987	1.16679	1.04752	0.779496	0.462737	0.199109
0.512699	0.484278	0.403435	0.336609	0.325586	0.435119	0.656817	0.884124	1.09061	1.26936	1.36924	1.40349	1.32094	1.12233	0.864816	0.685973	0.638351	0.688244	0.759787	0.735324	0.652022	0.552247	0.539397	0.607993	0.720862	0.854987	0.984183	1.10121	1.10927	1.0475	1.00463	0.991804	1.02692	1.07568	1.13027	1.18887	1.23561	1.31296	1.41995	1.44815	1.37342	1.19789	0.942608	0.691446	0.500538	0.405913	0.38669	0.33515	0.203036	0.0208239
0.966938	1.10153	1.15033	1.05837	0.841885	0.620838	0.484941	0.524142	0.657492	0.764789	0.81933	0.83627	0.845738	0.889433	0.936996	0.990327	1.0558	1.06154	1.01092	0.931164	0.810374	0.671522	0.59437	0.578176	0.618634	0.619092	0.617886	0.591931	0.585168	0.575175	0.541624	0.529968	0.568623	0.609741	0.618422	0.619743	0.673657	0.687267	0.593899	0.433594	0.205193	-0.0303093	-0.309926	-0.536922	-0.678584	-0.696131	-0.56413	-0.322168	-0.0960648	0.0419403
0.12636	0.0726588	0.103416	0.140081	0.185389	0.100728	-0.108844	-0.336045	-0.444418	-0.35464	-0.0781635	0.268251	0.536987	0.680345	0.791398	0.788574	0.662736	0.468771	0.240276	0.0203491	-0.0760875	-0.0724568	0.030607	0.311607	0.670036	0.959641	1.21236	1.35499	1.46554	1.49611	1.40434	1.2356	1.02042	0.866072	0.801749	0.778715	0.738127	0.70509	0.684681	0.753384	0.959769	1.21288	1.38145	1.41421	1.30591	1.091	0.895016	0.711294	0.65835	0.647653
-0.691066	-0.750484	-0.727874	-0.601755	-0.412245	-0.226449	-0.096898	-0.0811956	-0.182062	-0.28476	-0.327647	-0.248024	-0.0290292	0.20814	0.393616	0.465451	0.395347	0.266207	0.156496	0.0615158	-0.00324547	-0.0451298	-0.105361	-0.188598	-0.213845	-0.19387	-0.122966	0.00724851	0.188852	0.357832	0.460347	0.526535	0.597422	0.623687	0.572731	0.515486	0.427727	0.362044	0.336037	0.35668	0.395978	0.397643	0.321042	0.214172	0.0817975	-0.135061	-0.318158	-0.474401	-0.586562	-0.615376
0.276472	0.284822	0.204994	0.0669509	-0.136705	-0.375518	-0.557604	-0.615398	-0.608249	-0.545196	-0.451198	-0.339214	-0.228019	-0.160699	-0.0947683	-0.032375	0.0608444	0.154889	0.260363	0.307274	0.315535	0.317715	0.323168	0.314549	0.217723	0.0905558	-0.0311561	-0.0590386	0.0583726	0.218156	0.268918	0.163264	-0.0295168	-0.150082	-0.180747	-0.122561	0.0183603	0.197413	0.380152	0.504863	0.579937	0.546351	0.481563	0.391351	0.359709	0.396238	0.429195	0.436799	0.416964	0.38412
-0.885656	-0.77888	-0.65156	-0.556347	-0.513701	-0.536611	-0.595154	-0.620235	-0.579917	-0.473344	-0.327059	-0.215095	-0.158383	-0.198368	-0.349819	-0.542862	-0.756758	-0.850164	-0.775808	-0.666147	-0.623255	-0.646819	-0.75204	-0.892169	-1.01967	-1.10796	-1.10877	-1.00858	-0.890139	-0.813362	-0.757227	-0.690113	-0.630125	-0.53217	-0.399814	-0.277049	-0.173511	-0.179302	-0.230905	-0.375367	-0.524707	-0.614476	-0.591506	-0.47952	-0.331934	-0.186503	0.0106041	0.224783	0.379905	0.499374
0.633933	0.584514	0.501343	0.404016	0.261523	0.0832764	-0.0675174	-0.191427	-0.217882	-0.0916009	0.186667	0.557609	0.837811	0.923076	0.816661	0.540317	0.203065	-0.0514023	-0.220252	-0.237067	-0.143799	-0.0405531	0.018512	-0.0645778	-0.228031	-0.328542	-0.357728	-0.272807	-0.173448	-0.195226	-0.291396	-0.402859	-0.419566	-0.279058	-0.0268079	0.222673	0.373888	0.383483	0.344027	0.359	0.465311	0.597698	0.714228	0.745922	0.685781	0.541214	0.405549	0.312898	0.253267	0.209461
-0.0438919	-0.219115	-0.348194	-0.462122	-0.519752	-0.541974	-0.507832	-0.404621	-0.218739	-0.0185414	0.114859	0.143993	0.0716022	-0.0370314	-0.162885	-0.192157	-0.10733	0.0542355	0.126272	0.115938	0.0726893	0.0448629	0.0151575	0.00602908	0.040477	0.141592	0.296623	0.464638	0.604123	0.691936	0.681559	0.600034	0.508254	0.433032	0.411327	0.477242	0.596448	0.666835	0.574445	0.367608	0.131792	-0.0296634	-0.0605512	0.0300495	0.205727	0.330591	0.373275	0.333518	0.278899	0.265338
-0.301838	-0.215513	-0.202548	-0.237465	-0.34833	-0.504093	-0.677819	-0.859225	-1.0374	-1.18918	-1.26802	-1.24695	-1.17754	-1.07247	-0.964082	-0.821225	-0.675816	-0.545517	-0.562164	-0.741905	-0.972008	-1.11943	-1.11319	-0.932303	-0.651627	-0.408078	-0.222189	-0.096493	0.0517404	0.185695	0.345213	0.477995	0.566234	0.62463	0.642015	0.591892	0.526111	0.42275	0.325638	0.252618	0.133564	-0.04094	-0.273861	-0.534617	-0.747261	-0.87686	-0.965026	-0.982768	-0.988185	-0.953831
0.0826074	0.0685363	-0.0362934	-0.164102	-0.26548	-0.278997	-0.183356	-0.0400685	0.129175	0.223793	0.217588	0.0857875	-0.0753119	-0.183473	-0.209209	-0.173888	-0.182186	-0.183947	-0.155871	0.00603139	0.286433	0.624777	0.811313	0.748257	0.453643	0.120257	-0.096766	-0.118959	0.0250382	0.141405	0.201766	0.172289	0.171548	0.26299	0.497248	0.799883	1.06022	1.18117	1.21054	1.09627	0.772464	0.361269	0.00252589	-0.167368	-0.128235	0.0464322	0.183362	0.226794	0.228087	0.254925
-0.00262079	-0.0131574	-0.0118957	-0.0111919	-0.0599946	-0.13408	-0.191528	-0.174581	-0.0670289	0.0767203	0.216023	0.314376	0.402463	0.413999	0.418844	0.39545	0.380829	0.390776	0.420625	0.448117	0.434237	0.435112	0.425505	0.415325	0.383091	0.34174	0.33812	0.38552	0.557884	0.837627	1.13887	1.32044	1.36123	1.33491	1.26092	1.15122	1.03214	0.959919	0.914832	0.939561	0.962593	0.947492	0.944705	0.938489	0.987179	1.04397	1.08845	1.05118	0.904266	0.734597
0.362636	0.239579	0.0741149	-0.170258	-0.431545	-0.629207	-0.711504	-0.673471	-0.513519	-0.35606	-0.222497	-0.163564	-0.136175	-0.14915	-0.165586	-0.205433	-0.261619	-0.339688	-0.436311	-0.561696	-0.725076	-0.864868	-0.912074	-0.82788	-0.676954	-0.475328	-0.296082	-0.122784	-0.0329777	-0.0683874	-0.2136	-0.392423	-0.526083	-0.587564	-0.599172	-0.602376	-0.63979	-0.687035	-0.699615	-0.665318	-0.625678	-0.643515	-0.727136	-0.825201	-0.866817	-0.805788	-0.706049	-0.561298	-0.365027	-0.18809
0.946696	0.840364	0.762173	0.722263	0.673768	0.634931	0.610651	0.572758	0.460422	0.340431	0.260416	0.214321	0.151036	0.0339573	-0.13382	-0.371954	-0.593345	-0.744945	-0.789887	-0.76741	-0.694227	-0.578423	-0.451516	-0.372616	-0.348522	-0.450833	-0.635559	-0.881645	-1.17503	-1.40072	-1.51775	-1.47704	-1.35155	-1.13672	-0.902902	-0.635407	-0.339802	-0.100613	0.0899815	0.176492	0.132014	0.0824225	0.13787	0.352262	0.647426	0.956356	1.2434	1.40371	1.40837	1.19315
-0.73385	-0.694551	-0.637103	-0.593912	-0.514804	-0.385771	-0.233842	-0.111711	-0.0135274	0.0525839	0.124246	0.190738	0.216255	0.191603	0.146992	0.133237	0.204341	0.380514	0.573606	0.72744	0.792599	0.756704	0.65569	0.550176	0.516936	0.551938	0.60578	0.56192	0.459589	0.309842	0.0919009	-0.204288	-0.549357	-0.851742	-1.0596	-1.06467	-0.907667	-0.668877	-0.453328	-0.391099	-0.461144	-0.624222	-0.788622	-0.875351	-0.926141	-0.95012	-0.975332	-0.954148	-0.885204	-0.774024
0.927862	1.10813	1.34333	1.48443	1.51226	1.30314	0.937627	0.466658	0.0203028	-0.348424	-0.533395	-0.452525	-0.116709	0.338938	0.778332	1.14242	1.32258	1.43912	1.46719	1.52289	1.58785	1.66046	1.72016	1.76188	1.82766	1.84538	1.84557	1.7669	1.60486	1.31816	0.968206	0.508175	0.0310684	-0.38838	-0.687544	-0.82472	-0.825168	-0.724308	-0.529915	-0.250826	0.0165278	0.178809	0.166768	-0.0840399	-0.447623	-0.86519	-1.18432	-1.33003	-1.21015	-0.884076
0.196501	0.093407	-0.0167234	-0.105591	-0.21208	-0.379651	-0.666907	-1.01383	-1.3266	-1.50162	-1.57199	-1.59546	-1.6544	-1.82807	-2.08995	-2.43235	-2.83168	-3.27036	-3.59691	-3.72844	-3.65224	-3.46847	-3.26081	-3.05298	-2.77397	-2.33998	-1.81138	-1.29224	-0.923799	-0.815068	-1.00993	-1.427	-1.9207	-2.36293	-2.68112	-2.76102	-2.65298	-2.43886	-2.21251	-2.02837	-1.90413	-1.78803	-1.72833	-1.61407	-1.40155	-1.15455	-0.958063	-0.872741	-0.890824	-0.982071
-1.77081	-1.84301	-1.83074	-1.85166	-1.85796	-1.91495	-1.98218	-1.97646	-1.88063	-1.64808	-1.34621	-1.07264	-0.92987	-0.874652	-0.882417	-0.900729	-0.925696	-1.02836	-1.18341	-1.39287	-1.59042	-1.71752	-1.71091	-1.57141	-1.38899	-1.25399	-1.11854	-0.977218	-0.764438	-0.496784	-0.26328	-0.158641	-0.282101	-0.58621	-0.98314	-1.3417	-1.56071	-1.64608	-1.66214	-1.61939	-1.61366	-1.71078	-1.86365	-2.09391	-2.29096	-2.37036	-2.28531	-2.01845	-1.71972	-1.46445
-0.0115287	0.046201	0.238938	0.530082	0.842287	1.00453	0.989393	0.833339	0.698041	0.677046	0.755343	0.899775	1.02983	1.13427	1.1979	1.27893	1.35032	1.36324	1.32423	1.28987	1.33868	1.51595	1.75331	1.96081	2.04666	1.95445	1.81114	1.64844	1.48952	1.25255	0.883258	0.419702	-0.0472517	-0.43259	-0.681579	-0.825767	-0.902121	-0.869003	-0.775478	-0.605589	-0.398919	-0.180762	-0.00807262	0.0911566	0.144363	0.130032	0.0996994	0.0104354	-0.0930797	-0.202414
1.26449	1.15838	0.888626	0.491728	0.00588546	-0.516455	-0.963339	-1.34505	-1.59001	-1.7659	-1.93411	-2.10684	-2.25873	-2.39414	-2.42037	-2.30119	-2.0089	-1.70845	-1.53018	-1.50501	-1.63492	-1.83567	-1.97464	-1.94733	-1.71155	-1.34678	-0.99816	-0.777046	-0.819219	-1.08055	-1.39911	-1.58779	-1.6431	-1.52999	-1.27206	-1.00869	-0.703696	-0.433847	-0.0807594	0.347602	0.803765	1.09292	1.14882	0.961813	0.683457	0.494172	0.418016	0.412084	0.429091	0.423237
1.17243	1.01292	0.744982	0.512757	0.24301	0.0637087	-0.0952763	-0.298924	-0.60472	-0.952586	-1.19882	-1.20301	-0.952977	-0.608457	-0.308539	-0.184269	-0.219503	-0.314279	-0.485934	-0.720691	-1.03762	-1.43447	-1.80203	-2.09637	-2.21478	-2.10473	-1.85257	-1.48026	-1.14912	-0.91477	-0.772977	-0.588067	-0.241524	0.212769	0.61584	0.818093	0.762805	0.436939	-0.0541242	-0.538061	-0.875207	-0.965643	-0.809156	-0.511527	-0.249978	-0.122727	-0.106364	-0.135333	-0.181495	-0.215876
-0.299821	-0.383981	-0.398065	-0.357277	-0.296022	-0.260473	-0.229594	-0.182434	-0.122008	-0.0258718	0.0760244	0.16059	0.18356	0.203329	0.236353	0.299918	0.416269	0.594771	0.729944	0.76254	0.718931	0.685776	0.784999	0.994977	1.25555	1.43616	1.44007	1.31148	1.16492	1.07119	1.12128	1.24356	1.3427	1.42569	1.37119	1.19027	0.931958	0.709572	0.566246	0.580896	0.714296	0.877342	1.0304	1.07967	1.03242	0.94151	0.892819	0.868805	0.826204	0.763166
-0.598323	-0.85819	-1.1854	-1.51385	-1.70833	-1.73655	-1.54803	-1.2718	-0.935494	-0.68023	-0.528543	-0.49905	-0.574869	-0.628828	-0.626895	-0.560947	-0.474009	-0.328013	-0.194681	-0.0763989	-0.0140323	-0.030822	-0.191028	-0.492455	-0.751809	-0.904181	-0.859541	-0.645946	-0.337698	0.0095523	0.299797	0.528729	0.766494	1.04649	1.36074	1.72433	1.9792	2.19465	2.29437	2.29848	2.09033	1.72422	1.24228	0.775291	0.43841	0.213201	0.104815	0.00606871	-0.0890513	-0.197471
0.978641	0.889289	0.800072	0.773723	0.814578	0.899458	0.968796	0.983687	0.891093	0.662696	0.331257	-0.0172216	-0.26391	-0.376147	-0.35482	-0.245383	-0.0701974	0.12181	0.257398	0.420004	0.603095	0.828665	1.04014	1.18617	1.26499	1.2849	1.31122	1.4134	1.6099	1.8609	2.07604	2.18556	2.12286	1.94893	1.73975	1.57993	1.47195	1.41591	1.36027	1.33071	1.29872	1.25707	1.20002	1.10999	1.00942	0.875396	0.741603	0.6012	0.522155	0.437356
-0.300859	-0.260428	-0.221939	-0.183552	-0.212407	-0.279788	-0.374378	-0.485597	-0.513211	-0.487895	-0.456932	-0.497228	-0.631545	-0.803855	-0.90365	-0.923718	-0.916035	-0.889626	-0.872937	-0.888989	-0.922776	-0.960312	-0.96593	-0.983507	-0.989706	-1.02896	-1.08823	-1.11865	-1.0951	-1.07132	-1.06137	-1.10822	-1.18597	-1.21621	-1.17344	-1.12079	-1.10804	-1.18947	-1.29245	-1.32313	-1.22948	-1.06419	-0.912371	-0.852164	-0.844359	-0.809231	-0.775915	-0.736063	-0.731301	-0.791554
0.187515	0.142547	-0.0920846	-0.480779	-0.932409	-1.24776	-1.35671	-1.35452	-1.3146	-1.30431	-1.29533	-1.25094	-1.1621	-0.998561	-0.796714	-0.546389	-0.200486	0.169414	0.440252	0.464494	0.196789	-0.258395	-0.741897	-1.09708	-1.20887	-1.07923	-0.853116	-0.608512	-0.464203	-0.448446	-0.596185	-0.834218	-1.05501	-1.17173	-1.15272	-0.991466	-0.739098	-0.502298	-0.250661	-0.0489627	0.151243	0.317849	0.422972	0.37919	0.198654	-0.0906465	-0.342417	-0.488447	-0.512695	-0.462007
-0.266438	-0.444533	-0.483608	-0.43426	-0.268115	-0.0727384	0.0832103	0.193821	0.343237	0.513095	0.690073	0.827991	0.937959	1.01128	0.954006	0.836743	0.658001	0.468159	0.327326	0.283165	0.352523	0.436329	0.469971	0.442958	0.402334	0.369313	0.368767	0.376221	0.417645	0.550419	0.717662	0.984492	1.224	1.3708	1.33227	1.11434	0.786536	0.424783	0.14779	0.0886911	0.29063	0.652589	1.06411	1.35598	1.50086	1.47432	1.42111	1.3576	1.20909	0.969309
-0.42371	-0.40797	-0.3457	-0.257435	-0.202112	-0.193517	-0.281621	-0.428555	-0.575561	-0.696235	-0.760541	-0.768076	-0.752443	-0.729413	-0.687391	-0.631315	-0.60175	-0.602155	-0.61693	-0.626654	-0.604198	-0.548487	-0.446287	-0.315977	-0.218784	-0.165376	-0.213139	-0.391464	-0.626712	-0.854	-1.01267	-1.11954	-1.17936	-1.27531	-1.34256	-1.34906	-1.24413	-1.07085	-0.881474	-0.732744	-0.64407	-0.610617	-0.637118	-0.669715	-0.732217	-0.744299	-0.732957	-0.676885	-0.607045	-0.568273
-0.827733	-0.786403	-0.720777	-0.700999	-0.698386	-0.656157	-0.678316	-0.68182	-0.700648	-0.790169	-0.983858	-1.21414	-1.45194	-1.61886	-1.745	-1.85556	-1.93683	-2.04465	-2.09549	-2.02277	-1.82452	-1.52759	-1.1622	-0.749882	-0.385981	-0.16571	-0.11826	-0.197723	-0.336188	-0.461068	-0.593758	-0.756766	-0.895037	-0.960187	-0.850486	-0.635438	-0.375716	-0.152367	-0.0154786	0.0320733	-0.0046165	-0.111021	-0.229469	-0.353627	-0.42908	-0.437506	-0.406298	-0.399007	-0.40831	-0.416043
-0.358191	-0.453777	-0.436213	-0.240666	0.0710034	0.337779	0.474509	0.390242	0.20823	-0.00220363	-0.117168	-0.160451	-0.180294	-0.309851	-0.516741	-0.771013	-0.987802	-1.15218	-1.27645	-1.39219	-1.50491	-1.5978	-1.69014	-1.72507	-1.73685	-1.665	-1.45275	-1.08896	-0.687275	-0.415724	-0.34266	-0.405026	-0.498156	-0.587129	-0.600197	-0.572837	-0.509394	-0.344668	-0.124513	0.10326	0.253414	0.292181	0.197884	0.0607534	-0.141177	-0.356394	-0.590066	-0.75975	-0.843439	-0.803175
-0.483577	-0.648782	-0.696789	-0.665617	-0.522935	-0.31228	-0.0637512	0.0559646	-0.00102761	-0.10462	-0.114968	0.0638347	0.21535	0.243561	0.0829585	-0.296735	-0.723024	-1.04353	-1.20854	-1.23764	-1.19607	-1.17344	-1.18432	-1.18795	-1.17966	-1.04962	-0.752906	-0.354037	0.0162494	0.279893	0.379792	0.404746	0.437426	0.51881	0.58119	0.580338	0.535834	0.446706	0.401894	0.446576	0.626724	0.762766	0.865569	0.945848	1.04677	1.15043	1.19145	1.1974	1.1505	1.08102
-0.66487	-0.566199	-0.454375	-0.338226	-0.253318	-0.181647	-0.18757	-0.276787	-0.414182	-0.562351	-0.705221	-0.766832	-0.796667	-0.798124	-0.727139	-0.61569	-0.490746	-0.387298	-0.355818	-0.427172	-0.544665	-0.67199	-0.780462	-0.80841	-0.740308	-0.553274	-0.284541	-0.0172517	0.184979	0.327303	0.43768	0.528961	0.584324	0.504165	0.255068	-0.150117	-0.600195	-0.987568	-1.21574	-1.2299	-1.08051	-0.84733	-0.596839	-0.362356	-0.15256	0.052231	0.263666	0.418541	0.462896	0.433272
0.267171	0.343943	0.455237	0.582407	0.665676	0.718331	0.71808	0.668447	0.600282	0.535791	0.47132	0.448655	0.465698	0.549486	0.656845	0.718656	0.735326	0.704486	0.672644	0.668354	0.703728	0.772698	0.840757	0.909959	0.915501	0.917269	0.936125	0.974836	0.962064	0.8191	0.582601	0.310348	0.109072	0.03388	0.103309	0.279403	0.470077	0.656632	0.725351	0.688164	0.53078	0.305335	0.0838638	-0.0679785	-0.231649	-0.366151	-0.42293	-0.458209	-0.4529	-0.44526
0.0957084	-0.0164006	-0.123695	-0.202709	-0.261269	-0.30956	-0.342585	-0.347399	-0.308094	-0.260847	-0.269805	-0.368643	-0.489905	-0.586416	-0.581105	-0.495955	-0.427744	-0.461788	-0.587404	-0.713952	-0.718518	-0.5527	-0.375495	-0.136371	-0.00767564	0.126078	0.247788	0.38899	0.576592	0.785352	0.946993	1.04444	1.01889	0.84253	0.555836	0.310756	0.284881	0.497557	0.722767	0.891863	0.91131	0.813504	0.633159	0.457215	0.291045	0.127668	0.00692955	-0.0330785	0.0677246	0.264726
-0.14096	-0.0555125	0.0392225	0.0998151	0.12222	0.0505503	-0.0692045	-0.201077	-0.280485	-0.304687	-0.303163	-0.30573	-0.340303	-0.331199	-0.273974	-0.240367	-0.36081	-0.607031	-0.893481	-1.06681	-1.06697	-0.969765	-0.876834	-0.952483	-1.10035	-1.24571	-1.33808	-1.36443	-1.29426	-1.16964	-0.994138	-0.788496	-0.551695	-0.307087	-0.0697258	0.206414	0.454222	0.559161	0.407684	0.0394596	-0.38653	-0.654071	-0.724338	-0.622085	-0.4792	-0.406386	-0.402839	-0.417899	-0.41225	-0.369567
-0.774407	-0.684419	-0.637941	-0.639766	-0.683836	-0.663083	-0.571534	-0.42714	-0.285637	-0.13519	-0.0274977	0.0932686	0.287696	0.603894	1.01037	1.36577	1.6129	1.75072	1.84563	1.91358	1.99063	2.07992	2.05903	1.9223	1.74899	1.63239	1.54216	1.46515	1.30305	1.08296	0.803041	0.551122	0.441519	0.462682	0.601241	0.829967	1.06315	1.25455	1.3468	1.33815	1.26949	1.25824	1.30921	1.36408	1.35043	1.23403	1.02305	0.811694	0.68375	0.582101
0.386201	0.727319	1.05306	1.3594	1.56909	1.69899	1.64818	1.41127	1.06073	0.613662	0.141132	-0.228957	-0.467951	-0.468839	-0.239631	0.169487	0.643616	1.16869	1.67121	2.07729	2.35785	2.5033	2.59261	2.61339	2.60709	2.46962	2.14828	1.73038	1.3595	1.08531	0.91507	0.839014	0.775606	0.697199	0.637671	0.556556	0.465105	0.427212	0.534839	0.796618	1.1352	1.41439	1.56109	1.63355	1.60148	1.51305	1.42848	1.27382	1.20978	1.15295
1.34882	1.6536	1.98816	2.22001	2.30809	2.21691	1.99164	1.80433	1.74401	1.87186	2.05827	2.28779	2.50049	2.61806	2.61959	2.57943	2.48384	2.31806	2.14666	1.98621	1.89709	1.81518	1.69762	1.57272	1.37156	1.02539	0.68262	0.33646	0.066599	-0.0784565	-0.150498	-0.187723	-0.157458	-0.0620307	0.128336	0.393853	0.652263	0.868525	0.980125	0.971682	0.903956	0.841992	0.765207	0.721399	0.753665	1.00003	1.39835	1.87658	2.18706	2.18586
-0.736131	-0.745775	-0.79894	-0.861777	-0.926451	-0.932202	-0.878382	-0.822263	-0.7544	-0.726913	-0.659118	-0.502071	-0.234787	0.0269355	0.250039	0.348305	0.332033	0.192495	0.0174374	-0.140695	-0.205246	-0.119584	0.139775	0.473809	0.689792	0.746258	0.710065	0.691048	0.703513	0.741279	0.715307	0.576037	0.408894	0.239887	0.151684	0.177117	0.307575	0.552509	0.788499	0.922418	0.909945	0.811281	0.715408	0.656211	0.611632	0.52428	0.470066	0.488831	0.611753	0.78117
-0.703411	-0.570786	-0.429782	-0.233047	-0.0308483	0.205472	0.459527	0.70064	0.85557	0.943698	0.906728	0.781709	0.633111	0.494208	0.479577	0.63793	0.896026	1.07606	1.07966	0.856442	0.500146	0.0946058	-0.242819	-0.50877	-0.673835	-0.798004	-0.890012	-1.00208	-1.13095	-1.22445	-1.22531	-1.17299	-1.04623	-0.86198	-0.734386	-0.69153	-0.796034	-0.945955	-1.14016	-1.2252	-1.15088	-0.98467	-0.792153	-0.663145	-0.604064	-0.6029	-0.626529	-0.634778	-0.620521	-0.561237
-0.836097	-0.600066	-0.357275	-0.178172	-0.0858165	-0.0963837	-0.15689	-0.219994	-0.205852	-0.174134	-0.107103	-0.0871354	-0.0865817	-0.121213	-0.187021	-0.215941	-0.224965	-0.15461	-0.0465905	0.0857543	0.223519	0.353159	0.48013	0.566338	0.608407	0.610916	0.514348	0.334001	0.141597	0.0202123	-0.0171535	0.0523287	0.193556	0.340305	0.445377	0.522864	0.570917	0.558904	0.484698	0.343609	0.168306	0.0451726	-0.0053508	0.0728158	0.197426	0.298011	0.337786	0.316687	0.310204	0.315357
0.841597	0.78772	0.658664	0.439802	0.166327	-0.114533	-0.339744	-0.52983	-0.690699	-0.81514	-0.901036	-0.948896	-0.983094	-0.96264	-0.934325	-0.867652	-0.779633	-0.682464	-0.624546	-0.606271	-0.649484	-0.665137	-0.599279	-0.440486	-0.185071	0.0266137	0.146858	0.12903	0.0842368	0.0950771	0.169708	0.168296	-0.0119456	-0.353282	-0.75536	-1.01118	-1.01118	-0.798338	-0.517601	-0.271566	-0.162573	-0.175279	-0.23607	-0.332626	-0.419659	-0.513688	-0.612396	-0.692908	-0.71404	-0.623033
-1.27309	-1.17017	-1.06561	-0.97379	-0.959677	-1.03186	-1.24049	-1.47271	-1.67678	-1.79101	-1.82409	-1.83583	-1.81245	-1.71814	-1.54509	-1.21492	-0.883371	-0.663818	-0.628761	-0.731038	-0.890155	-1.03901	-1.1428	-1.2039	-1.28548	-1.3349	-1.33756	-1.23786	-1.13094	-1.12449	-1.22562	-1.35782	-1.45379	-1.41509	-1.268	-1.1014	-0.990202	-0.922737	-0.907036	-0.918837	-0.935502	-0.852558	-0.714463	-0.591267	-0.520323	-0.525455	-0.53474	-0.508719	-0.445205	-0.383895
0.612185	0.70006	0.838073	1.03649	1.1999	1.29036	1.27762	1.21842	1.114	0.99636	0.968993	1.04218	1.15565	1.27175	1.36312	1.41868	1.49299	1.63086	1.81919	1.94109	1.97098	1.88971	1.76477	1.51331	1.19125	0.843474	0.593065	0.452178	0.354891	0.225849	0.000235091	-0.26872	-0.528404	-0.693219	-0.774989	-0.827767	-0.874944	-0.993372	-1.12732	-1.22702	-1.26791	-1.17749	-0.975624	-0.743048	-0.585725	-0.513001	-0.531744	-0.607476	-0.711599	-0.823627
-0.751459	-0.671464	-0.643933	-0.680897	-0.725987	-0.742557	-0.693831	-0.542961	-0.252783	0.131901	0.57791	0.940495	1.21775	1.39002	1.45544	1.49085	1.52766	1.57513	1.59127	1.52368	1.31463	0.955934	0.48377	0.0585646	-0.201237	-0.252745	-0.15803	-0.0397015	0.0677382	0.167628	0.302767	0.463414	0.630139	0.840911	1.0426	1.23013	1.38411	1.39613	1.28947	1.09316	0.934837	0.839745	0.884735	1.00353	1.13077	1.20563	1.19126	1.10616	0.98333	0.853043
0.0728256	0.255706	0.391982	0.55198	0.686901	0.819702	0.966733	1.14721	1.3251	1.58137	1.84871	2.1339	2.3663	2.51327	2.66008	2.76356	2.8178	2.85037	2.8373	2.79608	2.77845	2.70392	2.59739	2.44376	2.22084	1.9218	1.5672	1.18483	0.840098	0.597258	0.465191	0.436792	0.461236	0.500051	0.531937	0.599853	0.5893	0.487304	0.335082	0.145823	0.0116192	-0.069522	-0.103311	-0.0522112	0.0386072	0.148659	0.257861	0.362349	0.391832	0.336204
-0.820539	-0.636502	-0.416781	-0.258354	-0.116858	-0.0551844	-0.00936577	0.0395694	0.13656	0.202627	0.139463	-0.00914522	-0.235756	-0.388574	-0.417907	-0.319469	-0.125381	0.0558796	0.141126	0.100704	-0.0702929	-0.278244	-0.453128	-0.552201	-0.497559	-0.315437	-0.0996276	0.0513839	0.103607	0.115949	0.135484	0.136196	0.133444	0.111263	0.122245	0.216951	0.37664	0.528482	0.604475	0.582818	0.533829	0.49305	0.476589	0.521528	0.535282	0.498526	0.408338	0.290871	0.202916	0.18909
0.735183	0.646196	0.548653	0.431043	0.267826	0.129878	0.0459288	0.0466023	0.0986753	0.140739	0.170412	0.21654	0.291569	0.427403	0.633745	0.794069	0.88504	0.888378	0.820779	0.693166	0.497891	0.338768	0.362008	0.541492	0.796105	0.951554	0.916332	0.650174	0.311599	-0.00672649	-0.287088	-0.508581	-0.718249	-0.914249	-1.05113	-1.10186	-1.02354	-0.796724	-0.511057	-0.188871	0.0729278	0.210231	0.139527	-0.123395	-0.501936	-0.845432	-1.09853	-1.27773	-1.3921	-1.47289
1.19061	1.27897	1.26699	1.1833	1.02583	0.863061	0.805405	0.76356	0.759681	0.766793	0.76929	0.768427	0.739595	0.616014	0.451232	0.165421	-0.133863	-0.234052	-0.106682	0.212921	0.601565	0.868906	0.930937	0.76749	0.45199	0.0979998	-0.201672	-0.43343	-0.54234	-0.527759	-0.420239	-0.291862	-0.251924	-0.376029	-0.67013	-1.09654	-1.5175	-1.78393	-1.83377	-1.76584	-1.59322	-1.49839	-1.53402	-1.70105	-1.86004	-1.91103	-1.8403	-1.69246	-1.54944	-1.46544
-0.627483	-0.673314	-0.839017	-1.05066	-1.30988	-1.47512	-1.4536	-1.31213	-1.14297	-1.00717	-0.968996	-1.02029	-1.12216	-1.20229	-1.24891	-1.25644	-1.27397	-1.29202	-1.31764	-1.34218	-1.32579	-1.29259	-1.25466	-1.2377	-1.23578	-1.16652	-0.977026	-0.727326	-0.523619	-0.398986	-0.394855	-0.514214	-0.704323	-0.883003	-0.985293	-1.03726	-1.02438	-0.971187	-0.944627	-0.917663	-0.884774	-0.812472	-0.734256	-0.640369	-0.612228	-0.708551	-0.883833	-1.11616	-1.27737	-1.39423
-0.222226	-0.163976	-0.0720443	0.00608488	0.132367	0.292332	0.443489	0.557281	0.628177	0.726813	0.845211	0.961727	0.954597	0.802501	0.55366	0.337851	0.266102	0.331485	0.56829	0.854202	1.13364	1.30254	1.35959	1.2585	0.978873	0.665336	0.40395	0.263603	0.225311	0.301504	0.424033	0.517476	0.57928	0.579289	0.597186	0.601655	0.619619	0.582687	0.51153	0.394598	0.316959	0.238362	0.186073	0.119836	0.0745648	0.0640495	0.0862333	0.101027	0.062273	-0.0296699
0.682261	0.835545	0.995979	1.18736	1.37801	1.51182	1.54448	1.47963	1.30622	1.06326	0.881632	0.778362	0.826094	0.966071	1.09015	1.14614	1.16226	1.09111	0.954645	0.790702	0.622032	0.584064	0.701054	0.950155	1.29096	1.58484	1.67855	1.47984	0.993825	0.310572	-0.421279	-1.02057	-1.415	-1.56415	-1.55581	-1.44249	-1.31134	-1.17877	-1.01746	-0.782887	-0.535372	-0.333481	-0.235679	-0.290159	-0.417371	-0.586617	-0.767046	-0.940946	-1.0486	-1.05988
-1.70039	-1.73599	-1.755	-1.75212	-1.76248	-1.83064	-1.93035	-2.03636	-2.09864	-2.03659	-1.82785	-1.5731	-1.42787	-1.48301	-1.66474	-1.82187	-1.87302	-1.80951	-1.74168	-1.71676	-1.73137	-1.78789	-1.84556	-1.92429	-1.94529	-1.85537	-1.6704	-1.40697	-1.1228	-0.900032	-0.821596	-0.884355	-1.05454	-1.25527	-1.38466	-1.36274	-1.10314	-0.78234	-0.487623	-0.320774	-0.291028	-0.341914	-0.364709	-0.365266	-0.337282	-0.257196	-0.143847	-0.0179315	0.00529125	-0.0577776
0.883815	0.958702	1.09802	1.29512	1.49456	1.62447	1.63047	1.56539	1.44685	1.38108	1.36227	1.42092	1.53466	1.71736	1.9519	2.14708	2.28899	2.36466	2.32781	2.12725	1.78892	1.35753	0.874543	0.375614	0.0135311	-0.253177	-0.427974	-0.570053	-0.6055	-0.527842	-0.293856	0.104608	0.577902	1.0621	1.39145	1.47124	1.37593	1.21767	1.08383	1.01098	0.975657	0.98598	1.04682	1.08393	1.15553	1.22194	1.19794	1.07611	0.894023	0.656903
-0.293562	-0.222446	-0.122193	0.0219006	0.220879	0.402318	0.535777	0.633347	0.706471	0.667227	0.548783	0.373895	0.263129	0.194001	0.213487	0.323523	0.514833	0.702122	0.78095	0.756284	0.610226	0.404023	0.198285	0.0893827	0.123673	0.253622	0.453956	0.721874	1.00791	1.27635	1.47034	1.51126	1.46809	1.31086	1.13716	1.01719	0.951393	0.886791	0.773881	0.59141	0.399899	0.276912	0.240737	0.248495	0.16118	-0.0793015	-0.321736	-0.446413	-0.421556	-0.314471
-0.401112	-0.337716	-0.23315	-0.17623	-0.102516	-0.0522581	-0.079693	-0.0961037	-0.125283	-0.13007	-0.100411	-0.0706385	-0.0656179	-0.0394499	-0.0276335	-0.0431424	-0.100168	-0.210534	-0.281523	-0.301803	-0.22861	-0.117865	-0.0287895	0.0522102	0.157744	0.258135	0.320189	0.277991	0.138602	0.0353661	0.0473243	0.181401	0.344938	0.432133	0.446375	0.398237	0.437061	0.570251	0.73333	0.875057	0.866738	0.725644	0.518567	0.290684	0.111137	0.0118895	-0.00204133	0.0406331	0.0652963	0.0367599
-1.12335	-1.00436	-0.851654	-0.708574	-0.614999	-0.641466	-0.707742	-0.77107	-0.731938	-0.587738	-0.398531	-0.227545	-0.0749524	0.0709022	0.233184	0.384193	0.431473	0.359284	0.218477	0.0518479	-0.0398512	-0.0745338	-0.027776	0.073851	0.195015	0.337771	0.420183	0.429199	0.382684	0.377969	0.421284	0.50966	0.600519	0.677838	0.698845	0.664994	0.616849	0.567008	0.529906	0.563671	0.632963	0.764194	0.896396	0.960977	0.936965	0.840218	0.678933	0.558963	0.4851	0.408913
-1.22092	-1.01791	-0.828795	-0.699215	-0.702904	-0.764099	-0.867573	-0.892629	-0.833524	-0.747704	-0.724769	-0.714226	-0.707951	-0.669318	-0.546334	-0.424985	-0.325949	-0.306161	-0.366548	-0.441009	-0.533829	-0.631482	-0.750114	-0.864994	-0.930842	-0.93605	-0.926971	-0.905615	-0.85107	-0.76142	-0.683935	-0.627367	-0.610581	-0.637018	-0.686975	-0.797372	-0.94255	-1.05645	-1.10335	-1.06573	-0.950663	-0.896966	-0.919746	-0.969472	-0.97774	-0.880904	-0.722535	-0.575859	-0.508559	-0.533108
-0.26506	-0.255313	-0.230168	-0.244807	-0.190575	-0.0656785	0.103886	0.264193	0.40756	0.448064	0.386188	0.263426	0.192524	0.25747	0.393899	0.495665	0.411914	0.156365	-0.159198	-0.471288	-0.661184	-0.684133	-0.565981	-0.371815	-0.175788	-0.0439877	0.0224384	0.0065473	0.032449	0.13092	0.273389	0.368697	0.392012	0.306729	0.140185	-0.100236	-0.322482	-0.479085	-0.568104	-0.599149	-0.63143	-0.621574	-0.594516	-0.594618	-0.654619	-0.744012	-0.822786	-0.941918	-1.09838	-1.19731
0.685555	0.682629	0.6446	0.529009	0.360315	0.121218	-0.0369474	-0.00673796	0.187339	0.456387	0.638899	0.682988	0.586237	0.419026	0.23058	0.108562	-0.0295703	-0.154462	-0.230263	-0.28039	-0.28853	-0.247396	-0.159225	-0.0556051	0.0466247	0.0890726	0.0931113	0.0337697	-0.0136424	0.0658187	0.296743	0.630455	1.03891	1.42954	1.72446	1.86295	1.87667	1.80108	1.69069	1.56155	1.43509	1.29986	1.13349	0.936223	0.721124	0.515448	0.308714	0.0967279	-0.107798	-0.213438
-1.94952	-1.89831	-1.78613	-1.61215	-1.43351	-1.31583	-1.27221	-1.2546	-1.19369	-1.02285	-0.727668	-0.376682	-0.0808522	0.0935247	0.139833	0.105323	0.0491431	0.0300632	0.0695597	0.147804	0.210605	0.20634	0.132203	-0.0161932	-0.191251	-0.364488	-0.485275	-0.585858	-0.68155	-0.795664	-0.942155	-1.09835	-1.198	-1.21147	-1.14707	-1.05662	-0.974588	-0.908059	-0.823471	-0.7207	-0.584162	-0.46062	-0.398263	-0.389683	-0.409483	-0.420221	-0.423883	-0.441808	-0.481333	-0.537902
0.994754	1.21518	1.37949	1.47345	1.47899	1.454	1.47029	1.55429	1.67506	1.78103	1.78385	1.715	1.65187	1.6449	1.69979	1.78138	1.83011	1.81379	1.71677	1.57133	1.39355	1.17182	0.899472	0.665699	0.504549	0.423639	0.396538	0.384366	0.330735	0.255692	0.169367	0.095979	0.0688436	0.114623	0.2395	0.446345	0.703421	0.962514	1.16424	1.24605	1.2277	1.12321	0.992092	0.867245	0.792092	0.766363	0.736991	0.714558	0.68989	0.685208
1.5408	1.59908	1.61941	1.59114	1.49761	1.3548	1.20012	1.06019	0.948551	0.816196	0.630974	0.403464	0.169376	-0.0411351	-0.19787	-0.315697	-0.399221	-0.470415	-0.52025	-0.586338	-0.701261	-0.852299	-0.997624	-1.04672	-0.97348	-0.795069	-0.588661	-0.393642	-0.259959	-0.232132	-0.317149	-0.495537	-0.701333	-0.849119	-0.89951	-0.868528	-0.791775	-0.702061	-0.611425	-0.464376	-0.285221	-0.0844001	0.124526	0.302461	0.41738	0.457258	0.404178	0.29306	0.123248	-0.0568928
1.78573	1.48998	1.14276	0.823464	0.539117	0.348128	0.253046	0.285937	0.348247	0.405617	0.457202	0.534935	0.595925	0.601934	0.500857	0.315925	0.116401	-0.0467205	-0.0826169	-0.00123251	0.181597	0.348478	0.487777	0.540087	0.609299	0.654456	0.706656	0.751503	0.711362	0.53913	0.267419	-0.087709	-0.50492	-0.927774	-1.26955	-1.4644	-1.46871	-1.26756	-0.897116	-0.444679	-0.069755	0.190733	0.302768	0.319792	0.284359	0.235518	0.164064	0.0555034	-0.0879618	-0.231252
-0.2052	0.0109425	0.22811	0.4235	0.582083	0.683363	0.720695	0.634782	0.475389	0.267167	0.0832864	0.00863782	0.0340661	0.124638	0.200433	0.233983	0.221685	0.177342	0.150715	0.166695	0.247782	0.370787	0.445617	0.423365	0.315954	0.121321	-0.0633493	-0.158617	-0.143568	-0.0712319	0.0209133	0.14341	0.317564	0.50659	0.6263	0.646509	0.591366	0.499448	0.451874	0.484252	0.556764	0.696891	0.826956	0.93031	0.993402	1.02781	1.01222	0.956528	0.882035	0.788603
-0.674051	-0.577396	-0.475432	-0.422528	-0.432013	-0.431218	-0.380206	-0.29408	-0.178822	-0.130172	-0.129743	-0.146323	-0.194704	-0.243142	-0.29549	-0.377254	-0.459119	-0.541475	-0.565906	-0.570547	-0.605642	-0.650981	-0.677763	-0.619619	-0.498582	-0.367341	-0.273801	-0.225333	-0.224488	-0.204595	-0.165616	-0.130655	-0.0677069	-0.00561234	0.0950833	0.214291	0.288266	0.305601	0.22049	-0.0354728	-0.402223	-0.84285	-1.25905	-1.52164	-1.55537	-1.41599	-1.19738	-1.0236	-0.940624	-0.966796
0.179072	0.286388	0.439098	0.564172	0.553559	0.412724	0.147445	-0.132906	-0.362808	-0.482932	-0.526258	-0.549643	-0.56732	-0.522749	-0.406039	-0.308269	-0.33711	-0.561082	-0.932574	-1.3073	-1.54593	-1.56626	-1.47429	-1.4333	-1.5277	-1.77936	-2.08516	-2.2601	-2.15553	-1.7886	-1.35737	-1.15252	-1.34923	-1.86498	-2.41153	-2.70666	-2.63044	-2.27754	-1.85961	-1.63792	-1.59994	-1.70105	-1.82219	-1.88832	-1.84148	-1.69269	-1.51712	-1.4933	-1.52854	-1.5761
-0.279879	-0.0521942	0.234149	0.547733	0.939665	1.31144	1.59881	1.65928	1.49412	1.13807	0.76014	0.518749	0.438084	0.463728	0.417816	0.258503	-0.0413807	-0.372624	-0.671198	-0.891009	-1.08075	-1.17509	-1.08276	-0.848409	-0.522549	-0.232214	0.0480312	0.312673	0.568955	0.759749	0.821423	0.721029	0.449575	0.0967003	-0.268865	-0.531214	-0.675744	-0.645938	-0.506299	-0.273405	-0.0799121	0.011421	0.0463442	-0.0153532	-0.12837	-0.277555	-0.41658	-0.499932	-0.492744	-0.403831
0.263236	0.199481	0.0956283	-0.0361125	-0.14946	-0.129969	0.0497478	0.320975	0.603254	0.796264	0.906014	0.940754	0.878574	0.785955	0.722881	0.675058	0.657402	0.595137	0.449042	0.265033	0.101871	-0.0100672	-0.0260282	0.0175594	0.0582595	0.0362335	-0.0676696	-0.1742	-0.253745	-0.216816	-0.184569	-0.214463	-0.307349	-0.481947	-0.613251	-0.693457	-0.715419	-0.650438	-0.531517	-0.393848	-0.184192	-0.00210735	0.119017	0.178252	0.123749	0.0340072	-0.0482838	-0.099582	-0.046227	0.0924999
0.357976	0.428081	0.454937	0.434304	0.317509	0.182929	0.124647	0.282943	0.578265	0.835912	0.969258	0.875272	0.677444	0.535459	0.509029	0.572098	0.6967	0.822394	0.936244	1.0801	1.18558	1.25472	1.1835	1.04133	0.898611	0.731951	0.529291	0.301763	0.056516	-0.131796	-0.185766	-0.0649778	0.153969	0.330749	0.403797	0.3926	0.32817	0.273041	0.244143	0.246464	0.237118	0.21537	0.215211	0.272626	0.386454	0.393481	0.223112	-0.0258935	-0.327716	-0.6388
1.32494	1.11813	0.903553	0.694491	0.548221	0.512567	0.5927	0.788568	1.0946	1.51103	1.86178	2.05073	1.99632	1.73952	1.36538	0.96599	0.681131	0.590427	0.645593	0.729849	0.753578	0.680272	0.542658	0.362746	0.231264	0.173327	0.127489	0.109157	0.141496	0.221686	0.290011	0.346649	0.301615	0.195914	0.0542408	-0.0546556	-0.0433448	0.0900631	0.251658	0.37078	0.35469	0.158075	-0.0940085	-0.309475	-0.417834	-0.351876	-0.23482	-0.140658	-0.126523	-0.209835
0.462564	0.353907	0.267922	0.151929	-0.00670847	-0.217633	-0.455459	-0.68078	-0.869039	-1.04055	-1.18885	-1.29988	-1.37935	-1.44202	-1.50382	-1.53918	-1.58167	-1.62305	-1.60215	-1.53335	-1.45199	-1.33263	-1.18978	-1.0208	-0.775332	-0.486275	-0.283711	-0.231296	-0.45763	-0.72315	-0.897154	-0.893155	-0.792066	-0.669097	-0.607631	-0.594452	-0.613267	-0.608515	-0.53376	-0.443832	-0.315822	-0.14215	0.00347187	0.0703856	-0.00435169	-0.161935	-0.293958	-0.323448	-0.302812	-0.282753
0.219133	0.28254	0.294783	0.224042	0.104982	-0.0607409	-0.293586	-0.476646	-0.534968	-0.429662	-0.269958	-0.0504496	0.148083	0.271319	0.320988	0.35202	0.373025	0.409624	0.485639	0.491003	0.445862	0.352501	0.273471	0.203128	0.125588	0.0453366	0.0922391	0.178496	0.283304	0.373261	0.404301	0.360532	0.212117	0.107417	0.0896011	0.161041	0.285103	0.424532	0.521441	0.593632	0.658836	0.768466	0.85747	0.896063	0.812328	0.656079	0.492145	0.33999	0.228062	0.131318
-0.382615	-0.166735	-0.0236029	0.0545439	0.0909314	0.120517	0.187806	0.266871	0.321803	0.245728	0.0762978	-0.165081	-0.323766	-0.40444	-0.361843	-0.243859	-0.106638	-0.0633024	-0.137594	-0.261736	-0.338558	-0.34056	-0.249326	-0.0778755	0.0615899	0.133769	0.114247	-0.0186826	-0.193136	-0.376915	-0.518701	-0.719228	-0.958329	-1.19113	-1.34945	-1.41405	-1.41604	-1.38933	-1.40201	-1.44424	-1.51705	-1.55761	-1.55227	-1.52816	-1.47323	-1.41904	-1.41603	-1.47456	-1.57018	-1.72914
0.414028	0.509166	0.64161	0.799744	0.91593	0.9572	0.901302	0.765754	0.628248	0.574202	0.59639	0.633498	0.605333	0.476024	0.252126	-0.00973797	-0.204624	-0.250127	-0.174026	0.00215646	0.192645	0.340444	0.397644	0.329077	0.20124	0.0295536	-0.148812	-0.330519	-0.496747	-0.674636	-0.82122	-0.900287	-0.910472	-0.894007	-0.854148	-0.779032	-0.671947	-0.588078	-0.561265	-0.578343	-0.654739	-0.745143	-0.855591	-0.971749	-1.0492	-1.09723	-1.11118	-1.06413	-0.95387	-0.831973
-0.317292	-0.362314	-0.39326	-0.428439	-0.390648	-0.300473	-0.190621	-0.120539	-0.0555989	-0.0027148	0.0803552	0.20862	0.380703	0.555166	0.672302	0.698486	0.613537	0.474509	0.305301	0.154351	0.0442694	-0.00539552	0.0184475	0.0615829	0.0811714	0.0411943	-0.0509083	-0.135028	-0.288157	-0.516407	-0.80226	-1.06309	-1.21703	-1.18575	-1.00942	-0.793117	-0.596466	-0.469227	-0.378133	-0.325506	-0.370983	-0.472831	-0.640716	-0.756638	-0.79289	-0.696229	-0.554587	-0.463663	-0.427064	-0.41882
-1.08607	-0.744766	-0.290405	0.186072	0.485693	0.50182	0.271179	-0.0354318	-0.302288	-0.410453	-0.372905	-0.279266	-0.211105	-0.234775	-0.273868	-0.322139	-0.382821	-0.434939	-0.477874	-0.5042	-0.541366	-0.563235	-0.557007	-0.581298	-0.596228	-0.608534	-0.625492	-0.655224	-0.721798	-0.757937	-0.725241	-0.567128	-0.361442	-0.170442	-0.104785	-0.150726	-0.272155	-0.391745	-0.42862	-0.342157	-0.136143	0.0639942	0.193155	0.216038	0.187139	0.241072	0.324861	0.393479	0.270075	-0.0885871
-0.042007	-0.0497399	-0.0516972	-0.00224522	0.061516	0.177341	0.380123	0.647757	0.879949	0.962876	0.911874	0.760719	0.579274	0.428791	0.344401	0.325793	0.360329	0.359131	0.38326	0.395168	0.392326	0.377604	0.286819	0.211839	0.142001	0.145293	0.165637	0.236231	0.346132	0.523947	0.724293	0.857175	0.887402	0.765376	0.49504	0.217311	-0.0281025	-0.210914	-0.288782	-0.252493	-0.130154	0.0858283	0.342515	0.607391	0.807843	0.884071	0.922417	0.952869	0.958157	0.904416
0.916794	0.884918	0.891257	0.946813	1.01111	1.03769	1.00507	0.858212	0.652063	0.447025	0.273085	0.200805	0.236888	0.314772	0.470356	0.682655	0.896455	1.02914	1.10918	1.14865	1.19166	1.16905	0.991816	0.693801	0.326434	0.0289503	-0.054429	0.0570097	0.249613	0.389728	0.385749	0.254882	0.0777866	0.00539011	0.0852063	0.348157	0.649056	0.900106	0.979555	0.872318	0.632614	0.397036	0.260948	0.207869	0.286164	0.428644	0.568708	0.573647	0.582564	0.592402
1.04195	0.974525	0.780957	0.545557	0.272982	0.0772294	-0.0034864	0.0107849	0.0580805	0.104122	0.148062	0.153671	0.0994159	0.0179972	0.0110536	0.0255397	0.0695835	0.129018	0.131332	0.12591	0.141782	0.222963	0.392639	0.490892	0.431387	0.226982	-0.0277974	-0.284483	-0.361981	-0.294896	-0.101156	0.0676821	0.0930997	-0.020372	-0.195683	-0.241217	-0.192578	-0.0402306	0.121289	0.257334	0.343447	0.342881	0.282592	0.156719	0.0155484	-0.0847806	-0.0906621	-0.0206949	0.162359	0.346977
-0.833414	-1.03322	-1.21066	-1.28206	-1.23896	-1.08352	-0.91572	-0.831986	-0.876716	-1.05023	-1.28136	-1.51847	-1.74527	-1.93237	-2.00205	-1.88657	-1.57979	-1.1763	-0.80284	-0.558704	-0.502	-0.572858	-0.698889	-0.83346	-0.958221	-1.08455	-1.19547	-1.26703	-1.31501	-1.27213	-1.1827	-1.10776	-1.05206	-0.998346	-0.897061	-0.739807	-0.604227	-0.482833	-0.421811	-0.415165	-0.443814	-0.488023	-0.51096	-0.471774	-0.349751	-0.130455	0.124291	0.347979	0.52222	0.613667
-0.434149	-0.317524	-0.182532	-0.0257183	0.178607	0.3406	0.367377	0.239202	-0.02207	-0.340193	-0.608001	-0.75242	-0.770272	-0.785713	-0.829902	-0.837779	-0.735405	-0.507877	-0.210821	0.0750207	0.290818	0.50658	0.663432	0.839524	1.00141	1.16504	1.23756	1.21252	1.10086	0.924615	0.699838	0.643498	0.744924	0.917891	1.08361	1.15607	1.09521	0.990237	0.89706	0.906875	1.05457	1.28874	1.51466	1.61467	1.51599	1.29316	1.10589	1.08845	1.28685	1.62504
0.47013	0.25661	0.0588997	-0.0540218	-0.0626603	0.0996237	0.356022	0.653466	0.920878	1.16853	1.38438	1.51646	1.52286	1.39343	1.19251	0.997514	0.88819	0.854804	0.871772	0.815366	0.668591	0.445748	0.226792	0.101784	0.00747515	-0.158021	-0.389588	-0.680464	-1.00402	-1.2734	-1.45227	-1.60644	-1.73731	-1.87965	-1.98518	-2.00247	-1.86083	-1.6781	-1.48974	-1.35165	-1.27373	-1.20756	-1.15908	-1.13246	-1.09181	-1.02039	-0.908766	-0.730499	-0.586108	-0.513444
0.555925	0.43039	0.195273	-0.0873764	-0.367392	-0.509737	-0.547908	-0.537685	-0.558669	-0.545149	-0.434542	-0.168582	0.122628	0.33805	0.403294	0.332212	0.258625	0.199661	0.168415	0.0950718	-0.00849737	-0.083576	-0.213556	-0.321987	-0.416557	-0.554547	-0.772523	-1.00296	-1.19407	-1.2655	-1.29612	-1.39559	-1.60047	-1.93155	-2.15735	-2.20767	-2.05459	-1.72392	-1.37675	-1.16527	-1.12228	-1.29018	-1.51297	-1.69337	-1.82932	-1.80479	-1.65589	-1.42687	-1.2256	-1.11613
0.570599	0.316398	0.0258544	-0.290196	-0.566138	-0.760161	-0.852448	-0.795947	-0.608355	-0.308659	0.0454226	0.421098	0.714404	0.887565	0.903736	0.890385	0.877227	0.890876	0.906966	0.91469	0.931686	0.934035	0.970026	0.960754	0.90201	0.787092	0.665885	0.559558	0.471686	0.402949	0.348596	0.316629	0.289634	0.263285	0.241812	0.21901	0.182048	0.119156	0.0635568	0.045887	0.0487493	0.0383049	-0.00120102	-0.04958	-0.126584	-0.197809	-0.234631	-0.203637	-0.117601	-0.0353469
-0.0820662	0.0477388	0.147611	0.203103	0.162219	0.051712	-0.0682716	-0.112634	-0.0360884	0.138297	0.355759	0.487005	0.53247	0.496361	0.469873	0.506993	0.593533	0.571856	0.384974	0.110024	-0.0642537	-0.0610786	0.0236495	0.0902759	0.0367437	-0.0592687	-0.147532	-0.145995	-0.115117	-0.0703106	-0.0106367	0.0300845	0.0698134	0.0907302	0.11805	0.186324	0.277822	0.372008	0.42491	0.40208	0.271602	0.146443	0.0514989	0.0944402	0.193948	0.311416	0.360858	0.331814	0.216481	0.121541
-1.9416	-2.02769	-2.08653	-2.07589	-2.03315	-1.98914	-1.96743	-1.99958	-2.12628	-2.28998	-2.44537	-2.5108	-2.47538	-2.39865	-2.29884	-2.25461	-2.27175	-2.31737	-2.33224	-2.29151	-2.19134	-2.06742	-1.9847	-1.96293	-1.99038	-2.02343	-2.05792	-2.07891	-2.06944	-2.0243	-1.96076	-1.92001	-1.91265	-1.95644	-2.0567	-2.14007	-2.20569	-2.2631	-2.33738	-2.40295	-2.39642	-2.27559	-2.066	-1.83533	-1.67867	-1.62952	-1.6491	-1.67054	-1.64335	-1.59189
-0.439961	-0.1745	0.0811268	0.289698	0.386613	0.417648	0.468652	0.487093	0.459552	0.364405	0.240826	0.180715	0.207835	0.367495	0.576182	0.74563	0.820121	0.827355	0.780657	0.714207	0.597107	0.459121	0.288353	0.168756	0.12379	0.170167	0.239596	0.347868	0.487323	0.64439	0.827962	1.01206	1.17478	1.23764	1.22102	1.17955	1.16869	1.13894	1.00492	0.814174	0.554634	0.302179	0.117436	-0.0551216	-0.160085	-0.21917	-0.212685	-0.166055	-0.130775	-0.0994696
-0.562169	-0.699851	-0.854178	-1.00905	-1.21766	-1.48541	-1.7465	-1.95815	-2.108	-2.22371	-2.28633	-2.31214	-2.31147	-2.22544	-2.03091	-1.83779	-1.69003	-1.67111	-1.71333	-1.83286	-1.90093	-1.87613	-1.74762	-1.53383	-1.26686	-0.960053	-0.824916	-0.958282	-1.4524	-2.10796	-2.72282	-3.13651	-3.30389	-3.23481	-3.0717	-2.86324	-2.65283	-2.41481	-2.13392	-1.82252	-1.59132	-1.43432	-1.33959	-1.27981	-1.20912	-1.12723	-0.98124	-0.792052	-0.5658	-0.308413
0.941403	0.879361	0.791138	0.651086	0.471963	0.364004	0.310634	0.320415	0.313449	0.256681	0.11654	-0.0754689	-0.341273	-0.581379	-0.777058	-0.804823	-0.61784	-0.33734	-0.109039	-0.0245173	-0.161001	-0.42736	-0.653852	-0.71256	-0.552363	-0.229043	0.0771143	0.267943	0.291685	0.23112	0.184471	0.194502	0.207023	0.190962	0.172599	0.159636	0.222079	0.288645	0.353797	0.381433	0.345171	0.209773	0.0534407	-0.078821	-0.125441	-0.0613043	0.0273213	0.0790984	0.00243179	-0.118554
0.40285	0.343462	0.194307	0.0636646	-0.0556982	-0.0564608	0.0230133	0.14232	0.182151	0.158962	0.102495	0.0679226	0.0355725	0.0421063	0.0924525	0.15846	0.24186	0.371702	0.473143	0.534066	0.56976	0.646318	0.793735	0.983631	1.22098	1.40326	1.47646	1.47192	1.42854	1.33092	1.23795	1.13603	1.07935	1.08636	1.14783	1.23443	1.30404	1.36457	1.41129	1.44127	1.4307	1.38427	1.36494	1.3833	1.46396	1.50198	1.49279	1.43033	1.33842	1.22828
0.187781	0.322285	0.473236	0.482693	0.394269	0.193436	-0.0548152	-0.248007	-0.354145	-0.465723	-0.54702	-0.568961	-0.484808	-0.281626	-0.0409667	0.168154	0.308378	0.345258	0.28171	0.0822758	-0.191031	-0.416954	-0.56193	-0.514563	-0.421052	-0.338671	-0.465894	-0.710838	-0.954059	-1.0922	-1.17515	-1.21892	-1.31379	-1.47734	-1.64257	-1.81852	-2.06585	-2.43643	-2.89406	-3.32273	-3.63991	-3.78096	-3.6991	-3.5515	-3.41474	-3.34633	-3.27674	-3.2024	-3.07076	-2.92519
-1.35406	-1.33015	-1.32588	-1.37901	-1.49902	-1.68687	-1.87062	-2.01438	-2.03982	-1.96856	-1.84087	-1.6874	-1.54414	-1.39808	-1.2606	-1.18688	-1.19953	-1.31046	-1.46134	-1.59379	-1.66431	-1.65388	-1.56769	-1.44952	-1.3736	-1.33346	-1.36349	-1.39814	-1.45413	-1.47853	-1.51708	-1.57179	-1.6258	-1.71562	-1.84344	-2.03914	-2.23229	-2.36241	-2.46088	-2.52242	-2.5319	-2.49461	-2.36389	-2.14834	-1.8821	-1.5936	-1.33683	-1.21086	-1.18712	-1.24412
0.437228	0.401886	0.331124	0.245348	0.140352	0.115045	0.140104	0.238742	0.322867	0.320364	0.247767	0.151768	0.0704599	0.0102433	0.0228434	0.0806928	0.162913	0.202053	0.178954	0.0693579	-0.109861	-0.2402	-0.22431	-0.0728484	0.122002	0.32372	0.523469	0.6279	0.635027	0.495738	0.276199	0.0318301	-0.185937	-0.406263	-0.646656	-0.832877	-0.995737	-1.07425	-1.08794	-0.937386	-0.662016	-0.32129	-0.0131756	0.152422	0.0904959	-0.199416	-0.619071	-0.962231	-1.08418	-0.942883
-0.490201	-0.486256	-0.41254	-0.27346	-0.0902325	0.0631638	0.110864	0.0371934	-0.146169	-0.325878	-0.389331	-0.281535	-0.0525401	0.243838	0.568973	0.854793	1.0803	1.18538	1.155	0.941434	0.60052	0.188261	-0.15597	-0.393047	-0.504155	-0.539136	-0.642403	-0.760976	-0.754866	-0.579385	-0.275263	0.0365026	0.207556	0.282613	0.291555	0.273161	0.248787	0.122756	-0.133094	-0.467885	-0.860025	-1.29809	-1.76029	-2.16688	-2.46012	-2.62078	-2.6356	-2.5084	-2.33341	-2.24319
-0.241202	-0.275884	-0.295111	-0.31827	-0.334011	-0.2933	-0.203029	-0.068609	0.0242327	0.0792567	0.106265	0.135036	0.225596	0.40577	0.628379	0.803091	0.896421	0.859562	0.714192	0.490445	0.262159	0.0574532	-0.0396443	-0.0234873	0.113098	0.270802	0.408515	0.519651	0.567175	0.494981	0.317434	0.118312	-0.0385363	-0.0761192	0.0332247	0.273712	0.564957	0.775738	0.89312	0.961902	0.994131	1.01991	1.02482	0.935074	0.709738	0.418463	0.116436	-0.0362274	-0.0228402	0.194904
-0.0805854	-0.0113349	0.00138754	-0.00694647	-0.0364032	-0.0918	-0.0935071	-0.0965753	-0.0890103	-0.0951551	-0.162323	-0.273109	-0.362312	-0.307587	-0.0852588	0.181377	0.322061	0.273016	0.0710854	-0.15929	-0.278966	-0.279225	-0.222702	-0.210323	-0.24379	-0.266656	-0.198095	-0.0224556	0.182768	0.376399	0.510159	0.530543	0.478825	0.337218	0.170701	-0.0218224	-0.162787	-0.225156	-0.206194	-0.0906624	0.0440446	0.176702	0.207066	0.121828	-0.0495378	-0.156925	-0.174424	-0.0741177	0.0874859	0.229372
0.0397328	0.0538654	0.0310184	-0.0686102	-0.19993	-0.230659	-0.174216	0.0214304	0.306289	0.619807	0.86109	0.995123	1.09371	1.13796	1.14468	1.10169	1.02096	0.895755	0.703007	0.551882	0.479957	0.514804	0.631725	0.711881	0.727018	0.638018	0.504026	0.326387	0.157598	-0.0462948	-0.265383	-0.48027	-0.728303	-0.885982	-0.978241	-1.02477	-1.02349	-0.970667	-0.912	-0.825015	-0.675211	-0.560226	-0.445554	-0.456872	-0.560507	-0.671342	-0.756514	-0.804465	-0.749384	-0.674472
0.491631	0.421555	0.406438	0.484197	0.673772	0.840843	0.9066	0.860405	0.661041	0.375302	0.172965	0.0589476	0.111968	0.305834	0.546289	0.704682	0.755717	0.636224	0.404365	0.0885513	-0.178261	-0.30886	-0.375207	-0.432988	-0.509546	-0.703816	-0.913728	-1.07302	-1.12617	-1.07904	-0.932427	-0.689325	-0.409446	-0.119705	0.140752	0.30791	0.368774	0.333242	0.259405	0.136479	0.0011909	-0.133023	-0.203852	-0.179681	-0.145455	-0.199856	-0.282727	-0.3407	-0.297497	-0.136201
0.0221215	0.119549	0.276444	0.431838	0.562509	0.633603	0.662963	0.655934	0.628007	0.605201	0.585536	0.582491	0.629469	0.720058	0.804269	0.763913	0.593975	0.353334	0.181169	0.122326	0.151918	0.263377	0.399086	0.464199	0.462308	0.475743	0.481297	0.457711	0.332932	0.15492	-0.00170022	-0.07092	-0.0125833	0.116152	0.255522	0.367477	0.419511	0.454676	0.498916	0.457907	0.354791	0.183942	0.0123955	-0.161668	-0.291554	-0.370596	-0.342407	-0.338963	-0.377962	-0.446079
0.692261	0.65093	0.621134	0.528055	0.330934	0.0173326	-0.321089	-0.576	-0.755677	-0.849785	-0.835182	-0.732592	-0.562066	-0.344453	-0.129119	0.0704454	0.129682	0.0838303	0.00149063	-0.0757289	-0.136247	-0.174475	-0.155949	-0.0642924	0.0266759	0.095872	0.171611	0.210166	0.224988	0.245201	0.283369	0.298132	0.257925	0.214564	0.133739	0.0873854	0.142324	0.284345	0.459998	0.591217	0.709414	0.811801	0.840327	0.783056	0.577822	0.215519	-0.213179	-0.575917	-0.814197	-0.886291
1.50073	1.59056	1.6429	1.59662	1.47414	1.2903	1.10535	0.946647	0.787239	0.617787	0.456359	0.337883	0.293723	0.33575	0.365095	0.381571	0.36633	0.381225	0.366894	0.32323	0.299708	0.277858	0.242045	0.204473	0.142977	0.0868232	0.109556	0.22661	0.427524	0.594946	0.6891	0.787753	0.907839	1.01641	1.06165	0.952405	0.721547	0.430231	0.199151	0.0880991	0.100946	0.158038	0.179427	0.151446	0.11875	0.158214	0.270487	0.363909	0.357562	0.225852
-0.807639	-0.925002	-1.07395	-1.21568	-1.23862	-1.08254	-0.797219	-0.435152	-0.144143	0.0999307	0.257987	0.383388	0.386389	0.314418	0.269287	0.328547	0.46174	0.653286	0.822695	0.848739	0.748592	0.622137	0.615648	0.672664	0.78696	0.843496	0.849901	0.858543	0.874167	0.970225	1.10005	1.15719	1.15587	1.00342	0.789468	0.519487	0.304231	0.0999371	0.0285946	0.10718	0.388625	0.759006	1.0933	1.27884	1.31226	1.30981	1.25473	1.23861	1.299	1.41527
0.730947	0.712513	0.755059	0.779787	0.796925	0.800521	0.798964	0.748975	0.671907	0.599069	0.597358	0.637365	0.700995	0.734964	0.76805	0.85489	0.980562	1.12771	1.19107	1.15409	1.04379	0.896927	0.771144	0.715053	0.680977	0.55952	0.406057	0.168039	0.0201914	-0.0136892	0.0999499	0.3072	0.431975	0.431533	0.364215	0.255126	0.134204	0.00321915	-0.20274	-0.428003	-0.639726	-0.764252	-0.803299	-0.791256	-0.75775	-0.756354	-0.709427	-0.662694	-0.578447	-0.487253
0.613484	0.416398	0.246351	0.103916	0.120285	0.168376	0.212266	0.257384	0.344369	0.506828	0.589023	0.570186	0.463861	0.326779	0.18527	0.0956864	0.0339077	-0.00451373	0.0528138	0.21772	0.478895	0.724973	0.844662	0.903161	0.967146	1.02519	1.02246	1.00534	0.942537	0.859583	0.790386	0.750749	0.813111	0.925917	1.09635	1.25673	1.36111	1.37327	1.30767	1.15728	1.01285	0.940489	0.981304	1.10367	1.19232	1.21846	1.24495	1.24119	1.25489	1.23682
-0.286119	-0.100411	0.130662	0.395462	0.574076	0.628609	0.57264	0.325802	0.0550579	-0.147796	-0.173386	-0.0114486	0.203397	0.359274	0.370005	0.271459	0.18445	0.141885	0.157322	0.191559	0.168829	0.0918129	-0.0690746	-0.302499	-0.473042	-0.512058	-0.398165	-0.155519	0.143179	0.369143	0.487514	0.509058	0.440684	0.423967	0.448734	0.500446	0.563834	0.656916	0.797601	0.983959	1.03064	0.845941	0.544444	0.189556	-0.0781541	-0.161535	-0.0526817	0.183695	0.439487	0.66072
0.349565	0.122091	-0.124705	-0.376893	-0.525235	-0.483691	-0.256552	0.0916918	0.517347	0.878303	1.08807	1.12308	0.996719	0.807122	0.652221	0.515525	0.476137	0.51929	0.569823	0.635952	0.673334	0.677516	0.600224	0.5271	0.467346	0.453537	0.534065	0.58309	0.572062	0.453322	0.237784	0.0241616	-0.128651	-0.163241	-0.0598324	0.138515	0.377872	0.624427	0.780819	0.813521	0.725035	0.597954	0.534246	0.553315	0.650952	0.692962	0.633291	0.460936	0.273358	0.136837
-0.625485	-0.573181	-0.447058	-0.265135	-0.11567	-0.0627133	-0.0158941	0.104495	0.31474	0.548033	0.73893	0.826145	0.774998	0.67171	0.67304	0.819143	1.04527	1.16364	1.13348	0.940214	0.645006	0.289105	-0.0632756	-0.460145	-0.800771	-0.948769	-0.946293	-0.857735	-0.79833	-0.799787	-0.903504	-1.10521	-1.36544	-1.6018	-1.83489	-2.04615	-2.14192	-2.1067	-1.97585	-1.73071	-1.44819	-1.18523	-0.976495	-0.880455	-0.792799	-0.654576	-0.400138	-0.127111	0.0478412	0.0545711
0.454916	0.299203	0.123172	-0.0614671	-0.24748	-0.394728	-0.530738	-0.553899	-0.461904	-0.345963	-0.227575	-0.153869	-0.110832	-0.102274	-0.152137	-0.243149	-0.358114	-0.494601	-0.623847	-0.661732	-0.569057	-0.296883	0.0636103	0.419788	0.646409	0.673234	0.54815	0.397629	0.320045	0.344383	0.35513	0.256471	0.0249527	-0.266434	-0.47225	-0.578857	-0.593695	-0.570565	-0.590276	-0.598598	-0.591786	-0.534805	-0.467599	-0.400826	-0.351286	-0.347934	-0.432369	-0.576151	-0.792809	-1.03363
-0.404012	-0.206523	-0.115026	-0.166728	-0.338562	-0.473725	-0.48855	-0.381549	-0.232555	-0.0911313	-0.0107036	0.0338144	0.00783166	-0.152713	-0.339415	-0.452178	-0.449137	-0.370634	-0.211257	-0.0118646	0.164036	0.229321	0.186854	0.129225	0.0839416	0.0441909	0.0428022	0.0293277	-0.0478484	-0.180502	-0.389051	-0.514819	-0.478679	-0.241359	0.109119	0.427493	0.608035	0.61173	0.488187	0.348452	0.297268	0.348029	0.511246	0.646851	0.65377	0.505627	0.192155	-0.0941374	-0.307939	-0.32962
-0.904306	-1.04548	-1.16549	-1.2614	-1.25102	-1.15984	-1.01854	-0.900539	-0.83501	-0.836973	-0.851008	-0.81321	-0.67392	-0.481421	-0.321621	-0.271804	-0.36854	-0.54476	-0.714222	-0.838671	-0.855415	-0.796227	-0.687775	-0.591943	-0.502276	-0.312228	-0.00950008	0.295371	0.482084	0.514536	0.358239	0.0796729	-0.271489	-0.59211	-0.841824	-0.97796	-1.05728	-1.08283	-1.1186	-1.17945	-1.25579	-1.26936	-1.20815	-1.06849	-0.827826	-0.501957	-0.110622	0.238969	0.505036	0.641759
1.35649	1.1752	0.980874	0.729447	0.471066	0.230461	0.077224	0.00332759	0.00305043	0.0583825	0.135049	0.195394	0.202813	0.174	0.175323	0.237037	0.372118	0.464132	0.452697	0.287847	0.0459562	-0.160409	-0.257143	-0.254415	-0.207852	-0.166556	-0.194999	-0.20086	-0.142664	-0.00219356	0.179363	0.313001	0.306277	0.205529	0.0132817	-0.177351	-0.273151	-0.307815	-0.367867	-0.463874	-0.573386	-0.58851	-0.549277	-0.473608	-0.450736	-0.447604	-0.440696	-0.381041	-0.251182	-0.115494
-0.221198	-0.26981	-0.318816	-0.388078	-0.502199	-0.614812	-0.751664	-0.814758	-0.824925	-0.813943	-0.80263	-0.759685	-0.678658	-0.609128	-0.518609	-0.425407	-0.318616	-0.223415	-0.134679	-0.0764816	-0.0631334	-0.0342111	0.0558418	0.152557	0.289988	0.384919	0.485524	0.529308	0.516271	0.471669	0.346538	0.182579	0.0342193	-0.0554699	-0.10914	-0.18433	-0.337977	-0.505024	-0.611027	-0.580611	-0.438209	-0.258239	-0.178475	-0.259727	-0.410837	-0.570795	-0.65471	-0.68608	-0.72481	-0.835319
0.116187	0.0998288	0.115055	0.155738	0.227386	0.316747	0.425469	0.549783	0.707591	0.836031	0.845737	0.68206	0.360891	-0.037668	-0.367307	-0.464193	-0.380695	-0.159794	0.0721896	0.189496	0.225744	0.156209	0.0459814	-0.0601731	-0.159239	-0.202454	-0.18492	-0.16449	-0.214332	-0.281526	-0.335845	-0.295348	-0.174085	-0.0174752	0.0596328	0.0792734	0.105814	0.153587	0.253584	0.344047	0.4281	0.390854	0.283169	0.131064	0.0262158	-0.0160642	0.00360326	0.0676601	0.199808	0.351325
0.239674	0.123384	-0.0471115	-0.203565	-0.363952	-0.435139	-0.349549	-0.14941	0.107529	0.310565	0.427887	0.453142	0.432758	0.325003	0.208841	0.0307797	-0.166463	-0.359789	-0.499557	-0.561912	-0.585062	-0.548311	-0.441349	-0.264585	-0.0483448	0.175835	0.349753	0.497592	0.622818	0.663737	0.605424	0.397999	0.140161	-0.0382745	-0.0937406	0.0243007	0.164041	0.260054	0.281046	0.253652	0.233478	0.213984	0.257902	0.316015	0.337022	0.402155	0.547789	0.656879	0.720636	0.680099
-0.420568	-0.390977	-0.301326	-0.165928	0.00746878	0.169352	0.280003	0.361542	0.351916	0.205814	-0.0186785	-0.227767	-0.319771	-0.253526	-0.0752847	0.0833698	0.207789	0.244242	0.161281	0.0370816	-0.0664229	-0.163503	-0.246042	-0.368464	-0.512871	-0.667727	-0.841653	-0.94911	-1.01544	-1.04108	-0.986484	-0.869593	-0.661641	-0.464546	-0.315643	-0.292819	-0.391867	-0.548834	-0.688031	-0.772366	-0.763217	-0.688286	-0.626507	-0.547128	-0.493863	-0.460277	-0.469375	-0.545944	-0.718852	-0.918743
-0.493992	-0.885682	-1.23474	-1.43514	-1.4142	-1.19991	-0.911482	-0.669257	-0.544626	-0.529565	-0.552635	-0.456031	-0.269897	0.0296058	0.383729	0.622282	0.691551	0.568986	0.305224	-0.0284618	-0.356907	-0.614011	-0.666907	-0.578456	-0.472097	-0.384837	-0.290375	-0.182716	0.0294464	0.308109	0.558362	0.725121	0.786835	0.740391	0.614853	0.530955	0.50899	0.547437	0.625132	0.786002	0.939888	0.941266	0.808503	0.568756	0.308996	0.0689932	-0.0782587	-0.171472	-0.273084	-0.399515
0.506007	0.540246	0.602126	0.622349	0.554584	0.374245	0.0969131	-0.170354	-0.383371	-0.506063	-0.497437	-0.359641	-0.162436	0.0807282	0.285422	0.388167	0.316541	0.097825	-0.115482	-0.246959	-0.221781	-0.0609741	0.161818	0.316762	0.387376	0.385171	0.30847	0.15318	-0.00779211	-0.101158	-0.152327	-0.138217	-0.118741	-0.0120769	0.0803504	0.107112	0.119882	0.0909924	0.0434899	0.0019002	-0.00483017	0.0711654	0.208773	0.387371	0.536715	0.638774	0.633599	0.537275	0.404458	0.236727
-0.977337	-0.639657	-0.285466	0.0606623	0.31663	0.432909	0.415496	0.254769	0.0273142	-0.186109	-0.267967	-0.226954	-0.0564825	0.233148	0.507622	0.658308	0.65564	0.508908	0.367356	0.212325	0.165004	0.254786	0.4121	0.599018	0.719691	0.737092	0.658894	0.52983	0.352287	0.237901	0.10923	-0.00664346	-0.158353	-0.266223	-0.256277	-0.128445	0.0646669	0.18552	0.224084	0.147366	0.118488	0.0908663	0.115542	0.158773	0.292548	0.520243	0.789903	1.01267	1.12188	1.15439
0.136025	0.160288	0.19173	0.227782	0.271347	0.292009	0.348019	0.385093	0.469946	0.591415	0.742031	0.845652	0.886501	0.800905	0.658465	0.575519	0.596961	0.660947	0.656899	0.472891	0.16053	-0.139789	-0.337677	-0.303733	-0.0642906	0.250002	0.524562	0.726857	0.80722	0.859988	0.852935	0.80588	0.726653	0.612965	0.453672	0.35869	0.349421	0.457286	0.638016	0.697516	0.626256	0.404428	0.111722	-0.177433	-0.340253	-0.424485	-0.422052	-0.364041	-0.264981	-0.166402
-0.213928	-0.131672	0.019205	0.17436	0.309223	0.375095	0.344855	0.270642	0.20076	0.125604	0.0141453	-0.0682706	-0.118495	-0.121531	-0.0764227	0.0333159	0.19813	0.368552	0.48813	0.541134	0.476151	0.312581	0.118771	-0.0974766	-0.266031	-0.386006	-0.432573	-0.434136	-0.373314	-0.220537	-0.00632871	0.146839	0.227258	0.22476	0.119863	-0.0470011	-0.193939	-0.224628	-0.226131	-0.204214	-0.266523	-0.40153	-0.582221	-0.684181	-0.672311	-0.543109	-0.347292	-0.194499	-0.0672894	-0.0924541
-0.343711	-0.255034	-0.14131	-0.0709358	-0.0232375	-0.0216476	-0.040785	-0.0766566	-0.132003	-0.14239	-0.089572	0.00498705	0.121805	0.19166	0.117747	-0.0663906	-0.24704	-0.307175	-0.224253	-0.0305213	0.174898	0.314558	0.386488	0.428503	0.489217	0.533006	0.578282	0.539333	0.357846	0.0474708	-0.223357	-0.341298	-0.290554	-0.119645	0.0235139	0.045595	-0.0200112	-0.0874124	-0.0499288	0.0902178	0.352227	0.659547	0.943325	1.08953	1.09056	0.937241	0.710008	0.450377	0.202392	0.0743074
0.000108954	0.115458	0.185877	0.131224	-0.0344578	-0.331564	-0.628574	-0.851471	-0.863206	-0.696202	-0.36072	-0.0445672	0.154735	0.213761	0.240883	0.267913	0.366281	0.511257	0.680067	0.735524	0.610644	0.341107	0.0684306	-0.0834477	-0.0695514	0.118111	0.342494	0.579891	0.71518	0.828012	0.879585	0.913886	0.914808	0.891507	0.832745	0.7739	0.770555	0.743807	0.68216	0.574344	0.473683	0.353	0.304142	0.339661	0.471058	0.670707	0.897443	1.14991	1.33514	1.45222
0.0491765	0.125616	0.214047	0.349344	0.475571	0.594057	0.707261	0.704622	0.570199	0.307343	0.0183682	-0.180847	-0.25656	-0.221352	-0.12644	-0.0491353	0.027222	0.0708534	0.0811106	0.00390339	-0.179215	-0.383293	-0.463333	-0.3031	-0.0370062	0.24264	0.348101	0.270072	0.0993674	-0.137955	-0.279875	-0.319348	-0.196248	0.0717397	0.3736	0.590874	0.633321	0.571268	0.441517	0.221766	-0.00375792	-0.170213	-0.23076	-0.24498	-0.257935	-0.263721	-0.174689	-0.0140398	0.167119	0.280302
-0.477387	-0.242035	0.00686484	0.126174	0.0597448	-0.178418	-0.484215	-0.669178	-0.659708	-0.519865	-0.344642	-0.259678	-0.22546	-0.177737	-0.129462	-0.06429	-0.0597355	-0.0912438	-0.136563	-0.0995349	-0.0442139	0.0765094	0.162266	0.145501	0.0376005	-0.151969	-0.309528	-0.464481	-0.487225	-0.334347	-0.0467511	0.261906	0.451701	0.509316	0.428236	0.308229	0.18978	0.164536	0.199695	0.200272	0.21798	0.136243	-0.0747684	-0.303885	-0.448674	-0.444481	-0.369068	-0.211442	-0.0918228	-0.0664766
-0.5263	-0.202316	0.0261871	0.0843849	-0.0410434	-0.281624	-0.43025	-0.473777	-0.446549	-0.419843	-0.40609	-0.368525	-0.369374	-0.345246	-0.332613	-0.313858	-0.260302	-0.190082	-0.074832	0.0515904	0.219273	0.357098	0.408506	0.415194	0.457549	0.532657	0.661718	0.760105	0.751615	0.645665	0.444187	0.204348	0.0742992	0.013726	-0.0222698	-0.0272802	-0.0945206	-0.121558	-0.0992608	-0.00872104	0.108152	0.198723	0.215921	0.207522	0.184046	0.0457524	-0.0802225	-0.211842	-0.264636	-0.148387
0.31849	0.437124	0.494529	0.57241	0.657358	0.724775	0.733785	0.63987	0.510747	0.435492	0.424977	0.51024	0.628061	0.639095	0.51918	0.288278	0.0601555	-0.0348563	0.0311761	0.249115	0.506423	0.668585	0.680435	0.620372	0.556163	0.512052	0.54391	0.654978	0.766393	0.879064	0.988656	1.08639	1.15482	1.13612	1.02465	0.92183	0.839246	0.738573	0.586789	0.375695	0.184275	0.10645	0.128419	0.19339	0.22799	0.161283	0.0656899	0.029588	0.079546	0.24201
0.622692	0.622841	0.500286	0.237639	-0.0468477	-0.326578	-0.474212	-0.511455	-0.397579	-0.264176	-0.141784	-0.122223	-0.210211	-0.323833	-0.410883	-0.419923	-0.34659	-0.232658	-0.12991	-0.150132	-0.253814	-0.341892	-0.356591	-0.303641	-0.197704	-0.132182	-0.122617	-0.132486	-0.136177	-0.102085	-0.0804325	-0.0740195	-0.0847339	-0.168374	-0.266344	-0.278163	-0.205076	-0.0942253	0.0626246	0.255595	0.44715	0.603142	0.736062	0.759151	0.700931	0.556465	0.348364	0.102689	-0.111902	-0.286821
0.271127	-0.00253458	-0.214634	-0.329761	-0.336991	-0.328296	-0.372403	-0.435319	-0.501136	-0.489665	-0.393599	-0.272669	-0.166997	-0.0729734	0.00731428	0.0948393	0.146427	0.137277	0.141663	0.0873719	0.000827089	-0.109745	-0.20834	-0.209304	-0.0780194	0.146764	0.368076	0.531286	0.547735	0.460814	0.296993	0.106229	-0.114087	-0.320684	-0.435059	-0.389094	-0.252335	-0.103605	0.00902375	0.0779739	0.118953	0.092345	-0.0493834	-0.2547	-0.424058	-0.529717	-0.518801	-0.472136	-0.468214	-0.488535
-0.131041	-0.0694111	0.0266927	0.155783	0.261124	0.313677	0.268561	0.155142	-0.0145249	-0.182949	-0.251988	-0.248982	-0.230548	-0.312265	-0.492825	-0.68661	-0.843009	-0.878098	-0.790661	-0.647743	-0.480725	-0.313324	-0.137379	0.0162977	0.150918	0.210331	0.153733	0.0313467	-0.0510292	-0.0793806	-0.00592139	0.127739	0.212546	0.237808	0.172025	0.0860845	0.0746258	0.129305	0.213977	0.262534	0.198691	0.0724329	0.0101089	0.00837889	0.0969982	0.236796	0.357038	0.421054	0.440152	0.366805
-0.202566	-0.138142	-0.0968877	-0.0520934	-0.00340793	0.0682951	0.14528	0.263592	0.314057	0.314633	0.238434	0.155369	0.0435581	-0.0669902	-0.23406	-0.362421	-0.406419	-0.378362	-0.248883	-0.122402	-0.0237198	-0.0244812	-0.088799	-0.155126	-0.118237	0.0360299	0.259397	0.419227	0.441614	0.265037	-0.0176376	-0.174979	-0.178287	-0.072081	0.0118968	0.021771	0.0274335	0.110161	0.251505	0.331772	0.253046	0.0716432	-0.05713	-0.0527971	0.0198995	0.132602	0.147446	0.134227	0.0714702	-0.0134395
1.21651	1.10176	0.977106	0.853626	0.731515	0.659198	0.614618	0.617574	0.620366	0.651729	0.619364	0.477115	0.303601	0.170052	0.148354	0.147736	0.145543	0.0686075	-0.0912073	-0.336524	-0.539314	-0.746875	-0.920003	-1.04835	-1.00406	-0.758208	-0.374457	0.0309836	0.334699	0.428633	0.284514	0.00691256	-0.229875	-0.261157	-0.131074	0.109151	0.324578	0.365833	0.212717	-0.0343965	-0.214391	-0.230333	-0.119695	-0.036829	-0.0481118	-0.193709	-0.397964	-0.546312	-0.590601	-0.524686
-0.3331	-0.357145	-0.369934	-0.281229	-0.141281	0.0303065	0.199595	0.299887	0.35143	0.311958	0.202922	0.0883155	0.0298279	0.0808002	0.183568	0.20964	0.181266	0.163839	0.187855	0.273013	0.327863	0.257849	0.0585999	-0.0730722	-0.117653	-0.0170466	0.0965057	0.111135	0.0347787	-0.12088	-0.272264	-0.332352	-0.273652	-0.182991	-0.0782915	-0.0174546	0.0152747	0.053856	0.164739	0.340674	0.464288	0.494539	0.450088	0.382194	0.319198	0.21926	0.136875	0.0511204	0.0777243	0.100917
-0.277075	-0.158664	-0.0471202	0.027811	0.0914303	0.121298	0.149149	0.244696	0.386885	0.552215	0.663647	0.684577	0.666107	0.582043	0.384223	0.0578726	-0.327258	-0.735334	-1.02441	-1.12734	-1.1027	-1.02016	-1.03103	-1.06997	-1.08524	-0.981393	-0.755127	-0.419771	-0.0936404	0.0843939	0.102654	0.033578	-0.0658873	-0.121824	-0.21358	-0.308102	-0.399665	-0.4794	-0.536224	-0.561578	-0.5878	-0.601369	-0.593907	-0.560945	-0.480854	-0.363473	-0.256412	-0.221375	-0.290972	-0.44187
0.0703392	0.0286819	-0.0412378	-0.113959	-0.124953	-0.0581309	0.120739	0.382855	0.565344	0.598986	0.480542	0.349916	0.331286	0.405907	0.522559	0.570856	0.513727	0.384437	0.308877	0.318896	0.393412	0.39658	0.291191	0.0785558	-0.188314	-0.402601	-0.510196	-0.519159	-0.545607	-0.648823	-0.807676	-0.926964	-0.980229	-0.939187	-0.79449	-0.657912	-0.545939	-0.431108	-0.306982	-0.167437	0.0262688	0.178951	0.286052	0.310581	0.265622	0.211734	0.157024	0.181501	0.208389	0.166453
0.87518	0.884341	0.840323	0.744067	0.605544	0.487502	0.457568	0.476365	0.530858	0.571855	0.628852	0.714945	0.804932	0.853313	0.851737	0.842222	0.850701	0.810268	0.767994	0.739405	0.72019	0.757588	0.808151	0.906715	1.01357	1.04993	0.967814	0.773927	0.536	0.261418	0.0224661	-0.154786	-0.190669	-0.126127	-0.0152142	0.151886	0.319961	0.481869	0.671872	0.853323	0.96863	0.957335	0.870685	0.796215	0.756995	0.705679	0.683325	0.653382	0.668447	0.716721
-0.644227	-0.55816	-0.515118	-0.543902	-0.607098	-0.626378	-0.563819	-0.445819	-0.211044	0.0301456	0.176684	0.191058	0.0972876	0.00799671	-0.00843742	-0.0295151	-0.0667547	-0.102389	-0.126726	-0.0610426	0.0653018	0.142697	0.0339629	-0.217545	-0.476406	-0.707848	-0.846187	-0.853312	-0.755978	-0.5745	-0.424572	-0.40662	-0.423098	-0.476713	-0.525006	-0.482222	-0.444658	-0.392776	-0.368578	-0.346312	-0.283111	-0.180548	-0.127551	-0.121485	-0.164084	-0.250512	-0.277538	-0.287364	-0.266043	-0.312639
0.884241	0.903133	0.880093	0.780811	0.621965	0.369608	0.110043	-0.0420864	-0.0724797	0.0413231	0.216778	0.470992	0.696811	0.791975	0.747081	0.634006	0.522308	0.45934	0.448775	0.407176	0.309072	0.205586	0.211031	0.3294	0.526212	0.681978	0.729412	0.589637	0.424734	0.310651	0.328192	0.433631	0.550979	0.575355	0.511454	0.352713	0.172033	0.0450405	-0.0896289	-0.119456	-0.0518476	0.135521	0.387617	0.58017	0.595369	0.513358	0.361202	0.281032	0.339356	0.418737
0.521986	0.459836	0.344761	0.208409	0.139095	0.103415	0.137607	0.183728	0.210294	0.265641	0.326628	0.434398	0.522914	0.574337	0.563637	0.466518	0.289849	0.123143	-0.0986195	-0.28918	-0.481406	-0.613813	-0.620119	-0.475494	-0.214297	0.0113852	0.0302482	-0.0908689	-0.230497	-0.334704	-0.330846	-0.293683	-0.285812	-0.318167	-0.437937	-0.537584	-0.543069	-0.38183	-0.114306	0.150422	0.367644	0.483363	0.453901	0.325824	0.219763	0.11495	0.054962	0.0734763	0.14305	0.271417
0.897552	0.649658	0.347995	-0.00123759	-0.262936	-0.372458	-0.372143	-0.346418	-0.371796	-0.438481	-0.515412	-0.531193	-0.514957	-0.466517	-0.404605	-0.306119	-0.151643	0.0227597	0.204932	0.338409	0.367795	0.300379	0.200341	0.0959415	0.0255605	-0.0616438	-0.162408	-0.219004	-0.202581	-0.145692	-0.0588165	0.0796082	0.190833	0.26935	0.245383	0.193488	0.0559872	-0.0878914	-0.198896	-0.261769	-0.322282	-0.448203	-0.582585	-0.683215	-0.649376	-0.534303	-0.421482	-0.397596	-0.418685	-0.435724
-0.238614	-0.0255497	0.230265	0.488881	0.712239	0.869397	0.98747	0.96596	0.90431	0.771032	0.653513	0.52323	0.395066	0.319721	0.306305	0.336349	0.379035	0.389303	0.376511	0.340044	0.289179	0.268406	0.298378	0.35313	0.357892	0.325587	0.297392	0.38957	0.505716	0.605887	0.673551	0.628549	0.470478	0.241494	0.088076	0.104281	0.264165	0.516203	0.751148	0.850884	0.850018	0.768247	0.647208	0.495857	0.395676	0.429803	0.640242	0.943686	1.12977	1.03735
0.0929056	0.035402	-0.0709814	-0.132661	-0.152885	-0.111165	-0.0560543	-0.0354065	0.0258016	0.073191	0.138971	0.179866	0.254774	0.309311	0.426694	0.565751	0.739017	0.867232	0.89775	0.884077	0.796524	0.708347	0.641305	0.629963	0.665057	0.754535	0.82154	0.841241	0.756644	0.602021	0.436366	0.301455	0.225244	0.156217	0.173337	0.283099	0.47595	0.620822	0.671255	0.624102	0.538609	0.448797	0.454603	0.508153	0.530485	0.455183	0.366252	0.30333	0.307633	0.296086
-0.475284	-0.376955	-0.278878	-0.12253	-0.00916727	0.041891	-0.0123216	-0.186536	-0.429302	-0.554703	-0.546464	-0.398779	-0.226057	-0.0722805	0.00940663	-0.0166349	-0.053751	-0.0748349	-0.111281	-0.163254	-0.237633	-0.338294	-0.425614	-0.421137	-0.317033	-0.133531	-0.0354666	-0.0613647	-0.143823	-0.269542	-0.377146	-0.525879	-0.681391	-0.778863	-0.7279	-0.549294	-0.252252	0.097012	0.422815	0.66639	0.847116	0.945242	0.92876	0.820472	0.595497	0.366997	0.162111	0.0185705	-0.0696814	-0.086179
0.0484769	0.011309	-0.118287	-0.309035	-0.486759	-0.548449	-0.456273	-0.221992	0.0632335	0.17273	0.0335076	-0.284335	-0.608056	-0.842087	-0.920102	-0.859237	-0.711308	-0.427473	-0.0858981	0.267636	0.508105	0.570666	0.521438	0.435471	0.386047	0.328832	0.239836	0.132544	0.00778212	-0.108504	-0.215528	-0.248301	-0.245519	-0.114188	0.117265	0.382801	0.606828	0.696278	0.739404	0.699161	0.605822	0.432848	0.320396	0.273905	0.243328	0.275522	0.31539	0.349744	0.363312	0.39919
-0.159136	0.0721747	0.329066	0.560928	0.713986	0.801786	0.817795	0.757519	0.632573	0.512123	0.42812	0.319391	0.143176	-0.151331	-0.456227	-0.686586	-0.78879	-0.724206	-0.570538	-0.390263	-0.237914	-0.187761	-0.291848	-0.509605	-0.792142	-1.05141	-1.15648	-1.13419	-0.945515	-0.660609	-0.384232	-0.191183	-0.13676	-0.163217	-0.27922	-0.445593	-0.623044	-0.742144	-0.829681	-0.942232	-1.06004	-1.17032	-1.15283	-0.969118	-0.610223	-0.216199	0.0390345	0.15161	0.135949	0.0250676
0.475917	0.338915	0.121712	-0.156278	-0.440678	-0.656413	-0.7469	-0.701514	-0.482833	-0.178537	0.0725622	0.169297	0.0743425	-0.113625	-0.303759	-0.47677	-0.586081	-0.744876	-0.940612	-1.21976	-1.5477	-1.75622	-1.86083	-1.81096	-1.64245	-1.36567	-1.03063	-0.728781	-0.482749	-0.333532	-0.294061	-0.352955	-0.426756	-0.521011	-0.587151	-0.628899	-0.657947	-0.646888	-0.620451	-0.560778	-0.421925	-0.195941	0.0709038	0.319537	0.567592	0.754979	0.838908	0.757692	0.607431	0.466645
-1.37283	-1.32377	-1.24492	-1.11622	-0.964967	-0.906596	-0.957538	-1.13816	-1.2739	-1.26656	-1.0247	-0.650098	-0.303539	-0.0332195	0.0533882	0.00997887	-0.0998632	-0.147012	-0.124411	-0.0764976	-0.145193	-0.326711	-0.514896	-0.647234	-0.64607	-0.59323	-0.557736	-0.578987	-0.603454	-0.518097	-0.387965	-0.286758	-0.311082	-0.476495	-0.639826	-0.710604	-0.674727	-0.657927	-0.70734	-0.842543	-0.997211	-1.086	-1.05502	-0.964873	-0.96327	-1.05441	-1.16444	-1.26192	-1.27682	-1.23917
-0.165303	-0.351901	-0.496949	-0.589081	-0.595727	-0.538777	-0.542245	-0.638625	-0.816794	-1.00188	-1.16078	-1.27548	-1.38143	-1.48651	-1.58913	-1.66276	-1.63761	-1.598	-1.584	-1.48618	-1.39716	-1.37603	-1.42981	-1.47293	-1.48482	-1.48286	-1.51098	-1.57645	-1.63394	-1.6335	-1.46055	-1.06444	-0.572477	-0.110105	0.163803	0.215509	0.0899781	-0.206423	-0.566423	-0.860242	-1.07749	-1.24902	-1.32813	-1.34052	-1.28097	-1.19022	-1.04012	-0.919096	-0.789867	-0.709388
-0.648574	-0.714246	-0.808556	-0.883961	-0.947205	-0.94418	-0.851619	-0.768729	-0.711747	-0.734036	-0.822113	-0.926899	-0.965639	-0.938632	-0.816383	-0.613471	-0.408233	-0.263155	-0.261553	-0.438852	-0.708399	-0.985146	-1.18487	-1.23855	-1.23723	-1.1719	-1.13736	-1.12513	-1.10539	-1.06064	-0.974869	-0.849291	-0.749021	-0.738169	-0.784525	-0.774365	-0.727206	-0.631554	-0.521699	-0.464004	-0.513563	-0.702342	-0.896468	-1.04282	-1.16553	-1.29729	-1.35272	-1.27352	-1.14173	-0.950382
-1.23923	-0.955422	-0.606065	-0.293829	-0.10341	-0.123467	-0.313461	-0.509877	-0.658396	-0.716997	-0.806625	-0.952588	-1.0567	-1.03417	-0.924181	-0.766481	-0.682408	-0.691128	-0.72755	-0.68255	-0.596733	-0.489734	-0.397777	-0.305074	-0.184539	-0.0500582	0.000800958	-0.125268	-0.374214	-0.617028	-0.611421	-0.36604	0.0695648	0.507683	0.801366	0.910965	0.866375	0.746991	0.588237	0.458809	0.355071	0.365734	0.452322	0.535678	0.578754	0.468252	0.240398	-0.0243137	-0.250281	-0.337193
-0.204032	-0.280586	-0.411873	-0.576728	-0.717208	-0.796282	-0.769575	-0.638973	-0.544404	-0.600582	-0.803302	-1.03955	-1.17979	-1.18366	-1.14315	-1.13429	-1.21843	-1.32728	-1.41947	-1.37403	-1.20924	-1.02689	-0.885332	-0.813914	-0.767256	-0.777336	-0.813291	-0.874436	-0.895669	-0.831241	-0.606306	-0.312022	-0.111704	-0.106174	-0.226563	-0.35681	-0.429625	-0.457346	-0.48391	-0.52881	-0.649085	-0.747559	-0.779645	-0.744557	-0.708535	-0.722334	-0.85346	-1.02148	-1.21248	-1.30405
0.150233	0.15922	0.0865361	0.0368147	-0.0126389	0.0514306	0.183491	0.377913	0.440935	0.432075	0.424858	0.449014	0.569811	0.710242	0.790773	0.733604	0.551496	0.364646	0.300857	0.32001	0.363978	0.409417	0.388736	0.350874	0.294832	0.230032	0.224256	0.201838	0.180892	0.115644	0.016762	-0.058588	-0.0222478	0.0563016	0.199232	0.39812	0.601333	0.77794	0.86539	0.872095	0.811556	0.701581	0.605142	0.55394	0.529451	0.569143	0.678043	0.815371	0.982293	1.11593
0.708038	0.825604	0.823792	0.719321	0.52798	0.362303	0.301057	0.343894	0.376082	0.334887	0.160665	-0.0682855	-0.240454	-0.315945	-0.377687	-0.41432	-0.484449	-0.594101	-0.685176	-0.786839	-0.870626	-0.901469	-0.925445	-0.975431	-1.02557	-1.05467	-0.992441	-0.852547	-0.737573	-0.633386	-0.527444	-0.418197	-0.329419	-0.267629	-0.229986	-0.201579	-0.160537	-0.0951301	-0.0181178	-0.0246711	-0.0877242	-0.150517	-0.139237	-0.0407475	0.129975	0.314841	0.483396	0.487613	0.335124	0.0921517
0.99646	0.808984	0.647877	0.538675	0.452947	0.39335	0.354031	0.262554	0.0911129	-0.122434	-0.374557	-0.575095	-0.602225	-0.457078	-0.193714	0.0954231	0.27996	0.312195	0.198228	0.0338089	-0.111898	-0.227495	-0.289442	-0.294665	-0.247732	-0.146674	-0.0620013	-0.0611478	-0.204523	-0.391919	-0.527875	-0.497831	-0.307173	-0.0237537	0.210738	0.319561	0.315929	0.267483	0.279837	0.345233	0.456592	0.593108	0.776251	0.918382	0.988196	0.983352	0.95709	0.961966	1.01307	1.06741
-1.20227	-1.14601	-0.952814	-0.664095	-0.353324	-0.143877	-0.124536	-0.339988	-0.669901	-1.00014	-1.20866	-1.22414	-1.09074	-0.923578	-0.848947	-0.85487	-0.936078	-1.0576	-1.13106	-1.14146	-1.10986	-1.05671	-1.03974	-1.02836	-1.02354	-1.02036	-0.985587	-0.918031	-0.77242	-0.535915	-0.266135	0.0133923	0.248502	0.426693	0.537792	0.523353	0.4519	0.311	0.161857	0.0367034	0.00752503	0.0907081	0.207482	0.326705	0.342974	0.301106	0.223201	0.167339	0.110402	0.085404
0.343664	0.368425	0.418599	0.506066	0.609419	0.700656	0.691418	0.632256	0.542656	0.402541	0.372574	0.363774	0.312803	0.111162	-0.135782	-0.366783	-0.437153	-0.323686	-0.0615534	0.150191	0.24283	0.14881	0.0134047	-0.170554	-0.348071	-0.465642	-0.512625	-0.476434	-0.436819	-0.466238	-0.637176	-0.864063	-1.00449	-0.977128	-0.739415	-0.439544	-0.204628	-0.164701	-0.300257	-0.571453	-0.763552	-0.792441	-0.593186	-0.288882	-0.0857553	-0.065434	-0.252535	-0.581865	-0.877115	-1.07065
-0.132029	-0.25971	-0.289131	-0.245789	-0.0766806	0.17255	0.280416	0.154321	-0.215664	-0.719102	-1.15858	-1.42356	-1.56425	-1.5658	-1.48537	-1.33726	-1.2319	-1.10357	-1.09952	-1.17042	-1.30168	-1.39001	-1.37234	-1.25286	-1.09803	-0.931735	-0.840638	-0.800698	-0.786713	-0.800059	-0.844085	-0.859017	-0.740873	-0.553707	-0.305935	-0.137865	-0.0712544	-0.101032	-0.2338	-0.367837	-0.46448	-0.537706	-0.565652	-0.578985	-0.493941	-0.339186	-0.160994	-0.137838	-0.256171	-0.537822
-0.221649	-0.188115	-0.154898	-0.187812	-0.248353	-0.281005	-0.290227	-0.252813	-0.178924	-0.168114	-0.193037	-0.200051	-0.195955	-0.233715	-0.320543	-0.440997	-0.529769	-0.547952	-0.426435	-0.258554	-0.0813517	0.0170391	0.0464897	-0.00971389	-0.150428	-0.394438	-0.65356	-0.837494	-0.8147	-0.647538	-0.412174	-0.185859	-0.0274289	0.0860928	0.111013	0.170015	0.26327	0.381183	0.43649	0.439635	0.39813	0.392879	0.511442	0.743638	1.05076	1.26406	1.3198	1.26235	1.12674	0.963355
-1.08199	-1.13742	-1.16594	-1.10108	-0.91681	-0.628319	-0.33665	-0.115386	-0.0139992	-0.0128888	-0.0601391	-0.11743	-0.195762	-0.236101	-0.257423	-0.279631	-0.314793	-0.376296	-0.453289	-0.569433	-0.667159	-0.698821	-0.643392	-0.566205	-0.490787	-0.392512	-0.288	-0.191953	-0.0996309	-0.0382597	-0.054501	-0.154428	-0.295957	-0.350803	-0.266018	-0.0791149	0.19127	0.427382	0.559785	0.573647	0.507102	0.408504	0.335	0.336528	0.445158	0.680079	0.938748	1.14013	1.2031	1.1098
-0.125421	-0.109556	-0.158745	-0.259394	-0.44623	-0.618166	-0.64487	-0.516081	-0.259147	0.0611879	0.381993	0.625621	0.77378	0.837162	0.802733	0.698579	0.531652	0.389264	0.252925	0.121894	-0.00579705	-0.088646	-0.168487	-0.239773	-0.344835	-0.419384	-0.450058	-0.444716	-0.400361	-0.332728	-0.240154	-0.147191	-0.0672	-0.0180873	0.0168649	0.0417001	0.0614762	0.0640505	0.0745442	0.169509	0.312375	0.451419	0.599841	0.689823	0.661354	0.53798	0.355613	0.230403	0.147551	0.180574
0.658543	0.751787	0.817625	0.857047	0.879182	0.847975	0.815178	0.766023	0.689899	0.620231	0.557958	0.502575	0.504074	0.562118	0.683054	0.828488	0.975577	1.06044	1.08844	1.00474	0.845157	0.673017	0.499118	0.35215	0.297601	0.314161	0.349705	0.406676	0.510083	0.629994	0.737853	0.796376	0.848228	0.932683	1.05891	1.27138	1.49685	1.63794	1.6409	1.56398	1.48824	1.46652	1.53642	1.67667	1.85076	2.00196	2.0739	2.0392	1.93865	1.80114
1.30516	1.15849	1.0121	0.883508	0.820363	0.819619	0.852649	0.847822	0.743962	0.612349	0.519756	0.515659	0.645666	0.779369	0.783095	0.62185	0.330373	-0.0670555	-0.439152	-0.645223	-0.588854	-0.369071	-0.122321	0.0937754	0.171535	0.0427228	-0.23135	-0.578052	-0.91508	-1.06694	-1.01055	-0.756608	-0.346521	0.114564	0.502586	0.759815	0.807038	0.658933	0.373053	0.0846117	-0.124148	-0.229259	-0.296142	-0.422575	-0.587715	-0.786998	-0.949554	-0.999522	-0.950436	-0.888561
-0.154187	-0.158004	-0.150846	-0.126509	-0.0970907	-0.11829	-0.110346	-0.0863147	-0.0493841	-0.018167	0.0119548	-0.000396727	-0.0378919	-0.0806315	-0.163349	-0.200328	-0.152158	-0.019336	0.108919	0.202011	0.158191	0.00287839	-0.160859	-0.290978	-0.323822	-0.230457	-0.123048	-0.00370092	0.10448	0.196151	0.270076	0.359727	0.447206	0.597286	0.774142	1.00065	1.17639	1.20092	1.13977	1.03746	0.945399	0.927009	0.945712	0.966415	0.94749	0.960072	1.05924	1.22316	1.35813	1.2752
0.272591	0.210353	0.200415	0.203285	0.249522	0.284456	0.281862	0.249555	0.217051	0.24432	0.372401	0.620075	0.9743	1.24784	1.37956	1.37031	1.27116	1.13126	0.93467	0.759578	0.710873	0.850296	1.14964	1.53362	1.88881	2.15522	2.30019	2.34815	2.28458	2.06715	1.74871	1.42076	1.18856	1.09659	1.1708	1.31645	1.47624	1.52154	1.44457	1.31192	1.12115	0.9467	0.854653	0.858761	0.900488	0.999318	1.11629	1.26943	1.41749	1.47467
0.294134	0.405052	0.392814	0.283665	0.0574889	-0.201649	-0.364642	-0.398908	-0.238532	0.0651862	0.339862	0.454398	0.37286	0.151453	-0.087231	-0.272872	-0.359958	-0.44852	-0.550564	-0.665712	-0.772025	-0.755925	-0.705827	-0.618584	-0.465236	-0.328606	-0.230751	-0.216729	-0.223416	-0.251008	-0.228213	-0.167702	-0.0439341	0.124495	0.317209	0.600402	0.846192	0.993563	1.00224	0.894779	0.755458	0.689818	0.766042	1.03314	1.35381	1.61601	1.70502	1.57426	1.37128	1.33725
-1.59867	-1.49723	-1.29866	-1.00941	-0.685844	-0.450743	-0.334749	-0.369372	-0.482951	-0.631599	-0.731094	-0.751178	-0.706202	-0.534285	-0.291697	0.00145579	0.322444	0.640355	0.943045	1.21499	1.39153	1.42835	1.37623	1.26582	1.2021	1.19283	1.22063	1.27	1.25371	1.17788	1.08113	0.999914	0.956461	0.916313	0.904049	0.926454	0.981794	1.04359	1.1065	1.14746	1.14831	1.11602	1.03176	0.904603	0.786999	0.716975	0.666611	0.675483	0.678427	0.690353
-0.901421	-1.06349	-1.15006	-1.18386	-1.11411	-0.967804	-0.759264	-0.551884	-0.445897	-0.493137	-0.699511	-0.950908	-1.13812	-1.21473	-1.14494	-0.980409	-0.78153	-0.648368	-0.626087	-0.76287	-0.954186	-1.12067	-1.17594	-1.07807	-0.895502	-0.715148	-0.590198	-0.493839	-0.357883	-0.204994	-0.0260932	0.117005	0.221492	0.288695	0.340557	0.407394	0.433399	0.476021	0.482186	0.461377	0.388685	0.217478	-0.0588302	-0.395385	-0.636678	-0.763602	-0.741291	-0.611025	-0.41506	-0.2132
0.539138	0.313767	0.0610602	-0.0696226	-0.123502	-0.111295	-0.111306	-0.17549	-0.280527	-0.358816	-0.371028	-0.33661	-0.278176	-0.267551	-0.291612	-0.365196	-0.537162	-0.768208	-1.00114	-1.18328	-1.22366	-1.08964	-0.82262	-0.543636	-0.344612	-0.261125	-0.266167	-0.294213	-0.311444	-0.273156	-0.254548	-0.23298	-0.247163	-0.229844	-0.135923	0.0120416	0.195583	0.309592	0.308289	0.18957	-0.0230124	-0.20347	-0.323891	-0.336114	-0.265271	-0.179196	-0.147645	-0.234332	-0.41221	-0.662998
-0.396543	-0.279595	-0.11887	0.0319321	0.0569969	-0.015662	-0.208482	-0.412001	-0.654987	-0.890244	-1.08916	-1.23237	-1.33354	-1.36953	-1.33462	-1.26936	-1.21123	-1.23299	-1.37906	-1.50259	-1.52319	-1.2851	-0.924423	-0.577526	-0.356028	-0.297766	-0.354398	-0.494912	-0.708353	-0.863651	-0.852361	-0.671853	-0.351418	-0.0640876	0.234333	0.531716	0.849446	1.1188	1.29584	1.32079	1.14473	0.814309	0.511468	0.261954	0.154959	0.138387	0.180354	0.137563	0.0853398	0.0357142
-0.230624	-0.0135347	0.163973	0.273188	0.269039	0.19273	0.0390665	-0.20845	-0.463212	-0.728086	-0.928914	-1.12971	-1.35146	-1.58648	-1.7736	-1.85035	-1.73645	-1.40735	-0.94196	-0.494008	-0.261119	-0.242844	-0.320112	-0.345994	-0.242424	0.0415728	0.453495	0.92427	1.38808	1.77242	2.01537	2.12801	2.05242	1.80438	1.48392	1.18444	1.00021	0.874503	0.807827	0.739607	0.65911	0.515485	0.345164	0.237323	0.172205	0.222501	0.416389	0.692098	1.01107	1.34009
0.265196	0.302461	0.363447	0.574161	0.833549	1.16622	1.41807	1.52014	1.43136	1.20155	0.882269	0.489497	0.154226	-0.120319	-0.33903	-0.474384	-0.491923	-0.413037	-0.314549	-0.245161	-0.257141	-0.316769	-0.395505	-0.410703	-0.364218	-0.278928	-0.220766	-0.201126	-0.187293	-0.24399	-0.267461	-0.226249	-0.191453	-0.209177	-0.282174	-0.416505	-0.522696	-0.5232	-0.420725	-0.285719	-0.17356	-0.168879	-0.166583	-0.128002	0.0410347	0.360106	0.631642	0.665662	0.453179	0.131771
-0.558557	-0.651253	-0.639699	-0.546758	-0.451856	-0.400848	-0.501345	-0.748884	-1.08433	-1.40187	-1.6834	-1.8019	-1.73748	-1.54774	-1.2627	-0.965635	-0.724417	-0.633276	-0.676412	-0.790175	-0.848486	-0.76297	-0.582774	-0.341862	-0.122124	0.041497	0.120307	0.132905	0.0128367	-0.030111	0.042595	0.25905	0.542027	0.784268	0.910245	0.927905	0.86114	0.746984	0.623033	0.516586	0.405565	0.198043	-0.0467924	-0.250068	-0.364701	-0.383952	-0.251236	-0.0620521	0.135063	0.304378
-2.47897	-2.55356	-2.55072	-2.40613	-2.12413	-1.78933	-1.50959	-1.30643	-1.3199	-1.53849	-1.84243	-2.11558	-2.21041	-2.11199	-1.85966	-1.54528	-1.34056	-1.36884	-1.59558	-1.95147	-2.28508	-2.48356	-2.55503	-2.5622	-2.54878	-2.56604	-2.60633	-2.67523	-2.77911	-2.84207	-2.7758	-2.61549	-2.34521	-2.06509	-1.84763	-1.70327	-1.57478	-1.43296	-1.26169	-1.12367	-1.0418	-1.07286	-1.23334	-1.43094	-1.57776	-1.59452	-1.54082	-1.4871	-1.52217	-1.6315
-0.141499	-0.201878	-0.315452	-0.484935	-0.642528	-0.734941	-0.668675	-0.454404	-0.217223	-0.0946775	-0.0867998	-0.121612	-0.114769	-0.0361837	0.102811	0.188019	0.164136	2.21236e-05	-0.251424	-0.527326	-0.784945	-0.986247	-1.20522	-1.42018	-1.63168	-1.83061	-1.93771	-1.93688	-1.83822	-1.64384	-1.42263	-1.2343	-1.14572	-1.1166	-1.12059	-1.16474	-1.22342	-1.30247	-1.37607	-1.47043	-1.57906	-1.71276	-1.83446	-1.938	-2.01292	-2.06439	-2.12526	-2.16973	-2.26045	-2.37487
-1.75168	-1.79937	-1.83898	-1.84577	-1.72659	-1.54424	-1.28414	-0.970325	-0.60706	-0.27013	-0.0272343	0.145375	0.231813	0.236323	0.225029	0.258276	0.311312	0.366801	0.386468	0.337392	0.224145	0.0841066	-0.06697	-0.123465	-0.118046	-0.0713544	-0.0798957	-0.151782	-0.268658	-0.417967	-0.494284	-0.50868	-0.477956	-0.368321	-0.184982	-0.0103049	0.0377009	-0.169975	-0.572696	-0.982369	-1.31694	-1.46586	-1.45679	-1.42317	-1.42818	-1.46267	-1.52747	-1.61302	-1.66526	-1.62113
-0.196108	-0.146127	-0.142376	-0.144082	-0.125537	-0.10743	-0.0990835	-0.0912583	-0.0172481	0.109367	0.2331	0.276384	0.159747	-0.113615	-0.411927	-0.596739	-0.624679	-0.557838	-0.553646	-0.662434	-0.839969	-0.957387	-0.968782	-0.904488	-0.799953	-0.717346	-0.671089	-0.710722	-0.823995	-1.0156	-1.17475	-1.22677	-1.2079	-1.13928	-1.12045	-1.17897	-1.32932	-1.48935	-1.6242	-1.68717	-1.6841	-1.59204	-1.48696	-1.41403	-1.37647	-1.39813	-1.42299	-1.40228	-1.30356	-1.17776
0.227031	0.271705	0.358339	0.419024	0.395091	0.238968	-0.0611211	-0.398006	-0.609121	-0.637838	-0.454418	-0.17515	0.0945699	0.213614	0.134305	-0.111559	-0.413075	-0.716706	-0.949634	-1.0703	-1.05509	-0.941652	-0.802097	-0.64845	-0.472768	-0.255209	-0.0464701	0.138873	0.267117	0.353453	0.439461	0.522689	0.56586	0.505907	0.257353	-0.0989315	-0.45576	-0.751215	-0.90714	-1.02341	-1.12583	-1.19929	-1.29717	-1.37692	-1.4264	-1.48651	-1.56218	-1.65964	-1.79136	-1.967
-0.202223	-0.19412	-0.121282	-0.00126467	0.134575	0.203989	0.215568	0.180944	0.131555	0.0491515	-0.0266722	-0.162856	-0.315846	-0.464413	-0.582983	-0.659241	-0.668418	-0.553659	-0.35096	-0.117874	0.125457	0.374927	0.626856	0.815255	0.93071	0.954917	0.92862	0.861069	0.805306	0.709882	0.533726	0.284725	0.0172778	-0.193139	-0.317553	-0.354209	-0.337055	-0.30221	-0.286756	-0.272587	-0.25925	-0.208136	-0.120315	-0.0411227	0.0489173	0.115412	0.152044	0.148149	0.102628	0.100485
-0.0494399	-0.0120243	-0.012819	0.00702701	0.0390438	0.0729935	0.186658	0.359225	0.528291	0.639148	0.627886	0.512119	0.341303	0.191344	0.0475837	-0.0793847	-0.213651	-0.319205	-0.354477	-0.290699	-0.147979	-0.00872895	0.109191	0.156097	0.166857	0.201785	0.222079	0.23429	0.171422	0.0635369	-0.0437781	-0.0766826	-0.0627986	-0.0248236	-0.0257968	-0.0664193	-0.0975891	-0.0999078	-0.0646227	-0.0313836	-0.0580944	-0.139903	-0.233926	-0.278432	-0.271886	-0.253871	-0.322232	-0.470866	-0.722341	-0.986863
1.53469	1.59053	1.6863	1.8049	1.90233	1.87316	1.73698	1.49105	1.27459	1.16217	1.26844	1.51832	1.75304	1.87178	1.83334	1.65016	1.40864	1.19809	1.01771	0.832122	0.660619	0.456753	0.269325	0.12769	0.0331929	0.0184329	0.0987333	0.250532	0.396375	0.506955	0.566856	0.574194	0.62033	0.687246	0.767923	0.773592	0.696904	0.618262	0.595168	0.689238	0.814777	0.93449	0.954073	0.865132	0.71262	0.586249	0.508204	0.479771	0.46599	0.415432
0.00604465	0.186327	0.42105	0.649525	0.842713	1.01546	1.14139	1.21169	1.27195	1.29068	1.32046	1.3567	1.42603	1.53983	1.66129	1.73333	1.74008	1.65055	1.49134	1.3234	1.21443	1.16598	1.18089	1.20078	1.23952	1.25149	1.25431	1.24354	1.22174	1.15666	1.07004	1.02012	1.0219	1.05978	1.08414	1.04531	0.934644	0.806443	0.674918	0.577588	0.513885	0.509872	0.573546	0.674394	0.788473	0.857088	0.841799	0.724401	0.58904	0.460293
-0.921364	-0.897227	-0.881238	-0.903555	-0.977735	-1.12317	-1.31642	-1.49962	-1.62759	-1.66907	-1.5847	-1.3483	-1.06037	-0.760057	-0.5796	-0.600292	-0.801624	-1.06991	-1.33352	-1.5425	-1.71125	-1.85004	-1.94075	-2.00155	-2.03879	-2.05788	-1.978	-1.70628	-1.18109	-0.506737	0.190215	0.738514	0.991308	0.960402	0.709568	0.346601	0.0331523	-0.165673	-0.280415	-0.332385	-0.334582	-0.352488	-0.35373	-0.33601	-0.3075	-0.265242	-0.209914	-0.214251	-0.253844	-0.364351
-0.77175	-0.835853	-0.928593	-1.05527	-1.17963	-1.29091	-1.38965	-1.51965	-1.63847	-1.71282	-1.68506	-1.57672	-1.43982	-1.3136	-1.26928	-1.24998	-1.19299	-1.06575	-0.918056	-0.770787	-0.692647	-0.641889	-0.608663	-0.617264	-0.550417	-0.47333	-0.328155	-0.154249	0.0958913	0.372982	0.53284	0.538291	0.387527	0.177465	-0.0170627	-0.130523	-0.240265	-0.396505	-0.567149	-0.751168	-0.911813	-1.03732	-1.13032	-1.16662	-1.16218	-1.07363	-0.903672	-0.67306	-0.488839	-0.38403
1.24686	1.06535	0.862741	0.653791	0.454657	0.311117	0.211355	0.152648	0.0931906	0.0351491	-0.0258861	-0.105033	-0.221528	-0.395161	-0.515673	-0.598717	-0.658829	-0.787318	-1.03054	-1.3877	-1.87019	-2.32976	-2.5984	-2.6815	-2.60942	-2.44002	-2.2814	-2.17306	-2.15027	-2.192	-2.31014	-2.50036	-2.70088	-2.82842	-2.84525	-2.72591	-2.46764	-2.13654	-1.74764	-1.39238	-1.15008	-1.04846	-1.08587	-1.24458	-1.43989	-1.62398	-1.83065	-2.0528	-2.34171	-2.64188
0.598767	0.523919	0.423206	0.189429	-0.15439	-0.523428	-0.851279	-0.984694	-0.945917	-0.771855	-0.601157	-0.494082	-0.438867	-0.441048	-0.479207	-0.545422	-0.543365	-0.503884	-0.436932	-0.406149	-0.376422	-0.334486	-0.266556	-0.190508	-0.16168	-0.192183	-0.295179	-0.353158	-0.355421	-0.373425	-0.442439	-0.587608	-0.767241	-0.934145	-1.04286	-1.08241	-1.03827	-0.993942	-0.870233	-0.709317	-0.558814	-0.420771	-0.315684	-0.229053	-0.15072	-0.0987614	-0.127845	-0.182485	-0.25679	-0.302155
-1.20448	-0.971857	-0.667176	-0.273624	0.163044	0.515994	0.690739	0.697107	0.578804	0.460792	0.444198	0.498805	0.505166	0.375237	0.153329	-0.122162	-0.332544	-0.498721	-0.630533	-0.780493	-0.91282	-0.994149	-1.04104	-1.01545	-1.00612	-1.05092	-1.21319	-1.41537	-1.67281	-1.82064	-1.79038	-1.55452	-1.23408	-0.962663	-0.793815	-0.720016	-0.763142	-0.902163	-1.20195	-1.56375	-1.87827	-2.04393	-1.98465	-1.79582	-1.54302	-1.2945	-1.05957	-0.889535	-0.753262	-0.712936
-1.24266	-0.860917	-0.453637	-0.0898913	0.170565	0.269411	0.258876	0.246318	0.255679	0.271083	0.239586	0.200813	0.166856	0.193094	0.250995	0.30051	0.301784	0.236417	0.132471	0.0203051	-0.0959796	-0.181382	-0.275377	-0.35722	-0.393501	-0.402549	-0.404297	-0.424487	-0.464506	-0.501411	-0.49562	-0.437962	-0.342657	-0.274031	-0.272532	-0.32391	-0.336227	-0.30334	-0.184645	-0.0264165	0.155369	0.293568	0.36804	0.355719	0.311771	0.264874	0.207034	0.101299	-0.0584649	-0.27868
-0.44594	-0.518226	-0.55219	-0.494136	-0.298648	-0.0809251	0.057429	0.0484866	-0.101996	-0.329636	-0.596065	-0.816178	-0.964027	-0.986162	-0.857512	-0.681224	-0.537083	-0.494077	-0.501153	-0.469726	-0.368163	-0.265717	-0.205378	-0.282419	-0.441464	-0.590334	-0.642724	-0.678169	-0.729667	-0.854575	-0.988727	-1.00646	-0.905202	-0.805311	-0.779104	-0.831703	-0.845864	-0.752046	-0.543268	-0.247369	0.000528591	0.0772907	0.0160619	-0.132346	-0.277432	-0.297614	-0.24779	-0.185367	-0.196098	-0.28289
-0.687165	-0.521541	-0.364776	-0.220165	-0.157917	-0.199393	-0.297906	-0.430138	-0.537284	-0.594815	-0.635529	-0.713876	-0.865959	-1.03439	-1.20384	-1.31846	-1.36757	-1.29978	-1.1712	-1.01433	-0.879596	-0.795939	-0.804002	-0.872118	-0.988121	-1.16689	-1.34953	-1.49606	-1.58513	-1.64402	-1.71476	-1.78613	-1.87066	-1.89591	-1.81188	-1.65914	-1.50903	-1.46782	-1.53514	-1.69834	-1.89591	-2.09014	-2.21937	-2.25914	-2.16045	-1.97225	-1.74471	-1.54348	-1.39697	-1.3251
0.187051	0.077488	0.0423892	0.04717	0.149111	0.240546	0.31258	0.345005	0.324795	0.169532	-0.0209673	-0.197464	-0.293643	-0.18649	-0.0108843	0.169571	0.308808	0.370452	0.447236	0.536224	0.573586	0.554548	0.475954	0.361677	0.327242	0.411544	0.551722	0.667694	0.596875	0.409367	0.236995	0.166664	0.256123	0.415608	0.516086	0.352979	-0.0504635	-0.591656	-1.10321	-1.45393	-1.71344	-1.88617	-1.99885	-2.00516	-1.89365	-1.60169	-1.16382	-0.652282	-0.238074	0.0197474
-0.696535	-0.65967	-0.553516	-0.368809	-0.0817884	0.290952	0.699038	1.14309	1.45449	1.6958	1.84076	1.91389	1.93092	1.83821	1.6197	1.31301	0.966923	0.651304	0.470646	0.411697	0.411337	0.412327	0.382678	0.370633	0.418896	0.487079	0.553086	0.601554	0.582255	0.5505	0.563527	0.581655	0.583737	0.53547	0.381603	0.1247	-0.181823	-0.429827	-0.488023	-0.262625	0.10729	0.536824	0.863872	1.01711	1.03445	0.94935	0.813938	0.606908	0.407389	0.177299
-1.13918	-1.27447	-1.37886	-1.4375	-1.41647	-1.32781	-1.21529	-1.10165	-1.03381	-0.976724	-0.944339	-0.945826	-0.952432	-0.961778	-1.00441	-1.06465	-1.1876	-1.3531	-1.55746	-1.72174	-1.75014	-1.61885	-1.34341	-0.987006	-0.744724	-0.718318	-0.899456	-1.2206	-1.57746	-1.85713	-1.99808	-1.99524	-1.93416	-1.84075	-1.7445	-1.70797	-1.66171	-1.57609	-1.40193	-1.13941	-0.934822	-0.831622	-0.860595	-0.993004	-1.13331	-1.09355	-0.867159	-0.546445	-0.242941	-0.0999743
-0.731706	-0.825729	-0.840449	-0.775596	-0.588071	-0.360426	-0.113453	0.0787377	0.183477	0.160823	-0.0145322	-0.294385	-0.641536	-0.947615	-1.15683	-1.26175	-1.28009	-1.32964	-1.50984	-1.81923	-2.23564	-2.57613	-2.70135	-2.56007	-2.21267	-1.7326	-1.34202	-1.14005	-1.12334	-1.21858	-1.31493	-1.34014	-1.23927	-1.10009	-1.05418	-1.24426	-1.63782	-2.11683	-2.55539	-2.80533	-2.85799	-2.84584	-2.83888	-2.89357	-3.02771	-3.16117	-3.30411	-3.38317	-3.4038	-3.35871
0.314949	0.238032	0.161232	0.130511	0.141926	0.275515	0.473134	0.688659	0.85987	0.955821	1.00187	1.06035	1.12853	1.22446	1.36291	1.49929	1.59791	1.6059	1.50701	1.43768	1.41497	1.45507	1.50781	1.58404	1.67687	1.76431	1.7948	1.74486	1.6534	1.61606	1.6108	1.66654	1.69279	1.62954	1.51662	1.41226	1.37691	1.48728	1.65707	1.81892	1.89949	1.86171	1.71385	1.4937	1.26601	1.11223	1.05651	1.04022	1.02974	1.04737
-0.907209	-0.894176	-0.813737	-0.686306	-0.456068	-0.181789	0.124352	0.44181	0.669667	0.778051	0.722494	0.550899	0.36076	0.26515	0.263634	0.342053	0.435912	0.47715	0.485133	0.479122	0.444858	0.376284	0.266616	0.183984	0.0804257	-0.0611006	-0.188776	-0.314902	-0.422769	-0.489857	-0.495072	-0.48582	-0.435022	-0.378324	-0.308048	-0.262227	-0.252622	-0.274774	-0.339008	-0.381403	-0.367863	-0.264	-0.091862	0.102219	0.293784	0.446849	0.505846	0.493403	0.377853	0.233468
0.149816	-0.248543	-0.67577	-1.07099	-1.40835	-1.67508	-1.82525	-1.84757	-1.80146	-1.72743	-1.6657	-1.71098	-1.81388	-1.92013	-1.99474	-2.12759	-2.33943	-2.62848	-2.9154	-3.11057	-3.10737	-2.80259	-2.30909	-1.70058	-1.07519	-0.540073	-0.0657571	0.290053	0.584185	0.761267	0.84088	0.749378	0.598073	0.461019	0.340246	0.242355	0.176485	0.194649	0.248702	0.396582	0.54063	0.658586	0.724145	0.785017	0.856902	0.896082	0.880727	0.779635	0.639379	0.41223
1.22327	1.24005	1.23126	1.16528	1.08772	1.03408	1.04372	1.06449	1.0719	1.01075	0.921705	0.834643	0.791362	0.79411	0.83003	0.87371	0.919869	1.04212	1.22597	1.43339	1.56798	1.60948	1.53583	1.41775	1.32082	1.33633	1.42635	1.53045	1.54099	1.41164	1.12914	0.825504	0.671037	0.672294	0.805429	0.954048	1.05054	1.05566	0.994023	0.941704	0.952343	0.972619	1.03201	1.06826	1.07862	1.03624	0.989355	0.997596	1.06934	1.19053
0.34588	0.188702	0.0349197	-0.0917246	-0.190131	-0.230478	-0.227387	-0.227417	-0.215997	-0.212734	-0.197184	-0.234133	-0.287034	-0.338614	-0.318625	-0.270257	-0.223963	-0.224313	-0.277735	-0.357981	-0.437135	-0.431176	-0.293318	-0.0996245	0.0212917	-0.064789	-0.360598	-0.77132	-1.15493	-1.42711	-1.50347	-1.39421	-1.16703	-0.881027	-0.656676	-0.478532	-0.243546	0.0689361	0.406759	0.687328	0.827166	0.843862	0.782779	0.728063	0.674082	0.625201	0.569173	0.545094	0.565979	0.665581
-0.69243	-0.537617	-0.416693	-0.374421	-0.467411	-0.657219	-0.885071	-1.05798	-1.1759	-1.22752	-1.1768	-0.982168	-0.691937	-0.383652	-0.23648	-0.255762	-0.417125	-0.617631	-0.699775	-0.725091	-0.669401	-0.633914	-0.66705	-0.760959	-0.903497	-1.1281	-1.43808	-1.86359	-2.30945	-2.70199	-2.97635	-3.11686	-3.09269	-2.89239	-2.55852	-2.10212	-1.57993	-1.08905	-0.716241	-0.476524	-0.349817	-0.244998	-0.219245	-0.330485	-0.505569	-0.711083	-0.905489	-1.02121	-1.07831	-1.07402
0.173275	0.0296703	-0.132448	-0.336931	-0.484038	-0.585494	-0.667834	-0.728067	-0.749005	-0.745466	-0.701136	-0.659978	-0.532327	-0.318772	-0.076525	0.195181	0.387719	0.469882	0.437376	0.36001	0.286378	0.267151	0.239388	0.246439	0.255819	0.294118	0.305423	0.251262	0.0960263	-0.147348	-0.373692	-0.461825	-0.400939	-0.278756	-0.227356	-0.291401	-0.38968	-0.509734	-0.642418	-0.788831	-0.926414	-1.06538	-1.15694	-1.17572	-1.12566	-1.08008	-1.0708	-1.12524	-1.2391	-1.40302
0.69114	0.62172	0.535379	0.520549	0.568288	0.663666	0.758731	0.771277	0.703772	0.641819	0.582409	0.548104	0.557304	0.543745	0.548345	0.5008	0.496245	0.548089	0.594572	0.614359	0.600996	0.542167	0.484688	0.501089	0.645101	0.873501	1.09674	1.29504	1.36536	1.19649	0.793346	0.261541	-0.270743	-0.610507	-0.683013	-0.549564	-0.34728	-0.148997	-0.0360637	0.00324006	-0.0391644	-0.115173	-0.178203	-0.222244	-0.199845	-0.148775	-0.024357	0.195977	0.43367	0.614371
0.0247189	0.00554868	0.0154025	0.0369842	0.0563281	0.0970134	0.204878	0.291315	0.411977	0.481277	0.513834	0.414273	0.25738	0.124946	0.114399	0.28637	0.534624	0.765089	0.835949	0.719495	0.496323	0.307302	0.201372	0.117193	0.0423144	-0.0637105	-0.148989	-0.155425	-0.112044	-0.0548165	-0.00427816	0.00777799	-0.108008	-0.328051	-0.631281	-0.862049	-0.878741	-0.62919	-0.244521	0.101201	0.305982	0.334435	0.304787	0.309844	0.410813	0.538058	0.677724	0.802206	0.839096	0.873493
-0.0416898	-0.0178055	0.00142236	0.0310717	0.0824516	0.1309	0.170025	0.0863273	-0.0838383	-0.302059	-0.458589	-0.516908	-0.468686	-0.349745	-0.254363	-0.271717	-0.426822	-0.626668	-0.841384	-0.958598	-0.953047	-0.830205	-0.673367	-0.596561	-0.604482	-0.723395	-0.911168	-1.16023	-1.43349	-1.70449	-1.962	-2.22472	-2.45445	-2.56744	-2.51253	-2.26035	-1.89848	-1.54433	-1.2915	-1.11643	-1.01744	-1.02669	-1.0855	-1.15522	-1.23607	-1.20878	-1.12828	-1.09757	-1.14822	-1.18576
-0.412003	-0.283971	-0.115842	0.101416	0.32206	0.506883	0.575887	0.48544	0.233882	-0.0874408	-0.398426	-0.571544	-0.602404	-0.503675	-0.408845	-0.360178	-0.404169	-0.578149	-0.801582	-1.01033	-1.10792	-1.16961	-1.24734	-1.36098	-1.47337	-1.53849	-1.54709	-1.40063	-1.21079	-0.979976	-0.773091	-0.599013	-0.45184	-0.398285	-0.36146	-0.392664	-0.433149	-0.496985	-0.468249	-0.390508	-0.219494	-0.0214774	0.150359	0.258016	0.271363	0.194279	0.0412671	-0.162691	-0.42283	-0.684201
0.0106215	0.00502463	0.0420853	0.0997208	0.149129	0.172537	0.136602	0.0776319	-0.0224645	-0.181757	-0.313245	-0.416043	-0.457162	-0.45519	-0.417504	-0.327743	-0.203316	-0.101943	-0.153218	-0.309964	-0.557313	-0.827265	-1.07056	-1.30547	-1.46819	-1.55437	-1.53027	-1.4605	-1.35395	-1.2588	-1.17978	-1.0994	-1.07164	-1.07955	-1.11324	-1.13929	-1.1067	-0.987413	-0.753275	-0.493889	-0.307681	-0.322271	-0.47534	-0.619131	-0.715544	-0.611234	-0.369911	-0.0998622	0.0930642	0.202717
0.561062	0.553418	0.523196	0.504382	0.484591	0.429465	0.347486	0.240901	0.069356	-0.149362	-0.343362	-0.43946	-0.386315	-0.175766	0.0627427	0.242438	0.296844	0.256368	0.101172	-0.101101	-0.360876	-0.622768	-0.843741	-0.95735	-0.937521	-0.797549	-0.646742	-0.578338	-0.583964	-0.659078	-0.787792	-0.900408	-0.978879	-0.996172	-0.990756	-0.939316	-0.841783	-0.689085	-0.496794	-0.339458	-0.220917	-0.168993	-0.222238	-0.388321	-0.57001	-0.704995	-0.765564	-0.744447	-0.729347	-0.693084
1.07483	0.969241	0.82098	0.608238	0.379253	0.196507	0.0933027	0.057622	0.0360696	0.0293233	0.0409197	0.130329	0.260413	0.384186	0.449461	0.425721	0.329998	0.207125	0.0950215	0.0193862	-0.028798	-0.0586006	-0.116793	-0.239116	-0.412262	-0.619505	-0.80921	-0.90575	-0.825221	-0.571373	-0.242572	0.0431486	0.212495	0.281095	0.283478	0.273701	0.265091	0.315113	0.396763	0.438872	0.412773	0.263599	0.0806662	-0.0333081	-0.0179479	0.0806454	0.182193	0.242991	0.280837	0.305971
0.959038	0.864802	0.764367	0.638982	0.556047	0.562825	0.608093	0.709083	0.801032	0.865087	0.899725	0.919943	0.912777	0.868585	0.709615	0.475543	0.256133	0.109196	0.120656	0.264826	0.466818	0.641235	0.814856	1.03032	1.25453	1.40536	1.4977	1.46474	1.38166	1.29509	1.26778	1.25813	1.30114	1.30188	1.20396	1.03411	0.844417	0.78274	0.892198	1.07534	1.21887	1.2266	1.11545	0.975148	0.92727	0.926011	0.96861	1.03643	1.06007	1.04648
0.602294	0.348076	0.0645955	-0.199923	-0.376004	-0.451658	-0.430126	-0.392658	-0.408131	-0.554411	-0.74957	-0.850704	-0.828782	-0.654376	-0.393705	-0.139495	-0.00153359	-0.0416097	-0.255597	-0.53761	-0.768065	-0.860436	-0.710441	-0.405232	-0.0585062	0.235602	0.427185	0.532813	0.51257	0.422615	0.272448	0.157752	0.126382	0.129717	0.122274	0.0550722	-0.0686443	-0.198761	-0.316274	-0.310067	-0.25638	-0.185248	-0.104857	-0.0438896	-0.0025584	0.0187042	0.0220974	0.0672984	0.169267	0.290672
0.934721	0.651029	0.44162	0.331796	0.370196	0.544154	0.759204	0.948471	1.0812	1.17267	1.22728	1.15127	1.05911	0.976017	0.962573	0.949492	0.932531	0.879122	0.825968	0.792946	0.805448	0.852628	0.904413	0.888465	0.78107	0.668631	0.533063	0.415526	0.241385	0.0243229	-0.130258	-0.133572	-0.0311907	0.153797	0.377748	0.647374	0.920375	1.26645	1.67778	2.03878	2.27729	2.26909	2.05348	1.70728	1.37386	1.10324	0.911696	0.760989	0.643948	0.580146
-0.517055	-0.470671	-0.465732	-0.500802	-0.577512	-0.686093	-0.830067	-0.97439	-1.09568	-1.16709	-1.16904	-1.14586	-1.00621	-0.761386	-0.471227	-0.25165	-0.106852	-0.104266	-0.168586	-0.27656	-0.411906	-0.511315	-0.557133	-0.490574	-0.317901	-0.0683747	0.180245	0.367983	0.428486	0.32315	0.0879366	-0.19575	-0.412033	-0.503606	-0.505492	-0.440167	-0.330095	-0.212269	-0.141305	-0.141355	-0.140679	-0.0908452	0.0455968	0.204599	0.330821	0.392645	0.391552	0.350918	0.362383	0.468306
1.24949	1.21713	1.19074	1.09217	0.966931	0.829993	0.64897	0.479747	0.342159	0.276762	0.20942	0.151265	0.131161	0.075335	0.0366762	-0.00497897	0.0275311	0.0783986	0.0966568	0.033397	0.0283343	0.134928	0.365037	0.721978	1.02727	1.1722	1.08358	0.804365	0.445084	0.183921	0.0488239	0.092836	0.209784	0.283015	0.273399	0.186351	0.0569536	-0.0511821	-0.0852329	-0.0455666	0.027154	0.0884172	0.132928	0.14045	0.110101	0.0655081	0.03439	0.137559	0.37629	0.681846
0.935842	1.01542	1.07362	1.12084	1.07284	0.889229	0.632975	0.366507	0.1902	0.149048	0.18411	0.23959	0.327033	0.410448	0.472505	0.529044	0.5421	0.585296	0.642438	0.755001	0.848526	0.931213	0.867659	0.661845	0.334134	-0.0222262	-0.293922	-0.454752	-0.391495	-0.165313	0.0973512	0.211111	0.144671	-0.0467351	-0.232301	-0.348343	-0.389195	-0.440778	-0.601123	-0.801902	-0.999076	-1.09085	-1.10224	-0.992779	-0.826792	-0.623014	-0.473694	-0.412873	-0.377047	-0.312053
0.90034	0.658602	0.433213	0.208449	0.0379788	-0.107004	-0.143414	-0.044973	0.127156	0.283291	0.351045	0.34836	0.23518	0.120578	0.0344689	0.0564784	0.155997	0.375521	0.657408	0.86704	0.894433	0.7566	0.602698	0.510114	0.472744	0.454637	0.416227	0.35408	0.303264	0.289143	0.304349	0.306259	0.265295	0.159216	0.0550676	0.0199295	0.076796	0.17828	0.291059	0.339127	0.319655	0.264128	0.154089	-0.026579	-0.228209	-0.353614	-0.289878	-0.125099	0.0520492	0.165113
-0.725197	-0.627231	-0.51887	-0.389131	-0.227061	-0.1245	-0.12377	-0.182412	-0.30184	-0.354192	-0.320422	-0.205296	-0.080842	0.0200366	0.0151642	0.00334013	-0.0299132	-0.0716399	-0.0772769	-0.107402	-0.155838	-0.259602	-0.359158	-0.44059	-0.397488	-0.220054	0.0290828	0.308732	0.548154	0.798763	1.01579	1.12987	1.12353	0.984436	0.81941	0.702762	0.645266	0.648779	0.687675	0.648675	0.532297	0.407235	0.360137	0.368283	0.390515	0.299142	0.117125	-0.115292	-0.350907	-0.476125
0.358872	0.296768	0.252474	0.153395	-0.00516935	-0.205189	-0.428567	-0.559533	-0.613157	-0.564076	-0.414371	-0.230821	-0.0727085	-0.00351287	-0.0400913	-0.170623	-0.328491	-0.451801	-0.514276	-0.49428	-0.423093	-0.269095	-0.0705138	0.174535	0.366158	0.482284	0.448631	0.287051	0.0963648	-0.101183	-0.203293	-0.155701	0.0381461	0.26406	0.434276	0.483299	0.423138	0.268539	0.14571	0.11503	0.202958	0.359207	0.486465	0.52653	0.482389	0.39495	0.322482	0.248171	0.116659	-0.0112019
-0.284759	-0.0258996	0.293788	0.641906	0.916204	1.09686	1.14414	1.12865	1.05237	0.948878	0.749323	0.556037	0.370904	0.281441	0.324333	0.418118	0.494709	0.40898	0.149263	-0.220956	-0.507235	-0.597018	-0.452123	-0.155194	0.235567	0.640709	1.00357	1.25572	1.36576	1.2304	0.931261	0.563476	0.245825	0.104065	0.16165	0.358037	0.509764	0.530693	0.446868	0.382731	0.418563	0.542076	0.764076	0.960206	1.11715	1.23971	1.37938	1.5641	1.73443	1.85893
0.179235	0.191061	0.135863	0.025055	-0.101185	-0.140562	-0.0879772	-0.0129457	0.012352	-0.0435808	-0.120317	-0.160882	-0.135306	-0.0726974	0.0219214	0.107696	0.141367	0.15179	0.0635271	0.0267395	0.0524741	0.195639	0.513372	0.846863	1.03972	1.01743	0.851122	0.682066	0.644788	0.753165	0.882407	0.945043	0.926585	0.805401	0.633962	0.501913	0.442971	0.485946	0.585208	0.625476	0.598151	0.555448	0.509293	0.516026	0.536156	0.493457	0.387897	0.283157	0.161081	0.0386275
-0.0272858	0.276755	0.51805	0.641158	0.646559	0.588975	0.535966	0.554197	0.57515	0.63156	0.759455	0.949517	1.12271	1.17186	1.01536	0.639679	0.192039	-0.165929	-0.305884	-0.288578	-0.203738	-0.0647655	0.0821342	0.191577	0.265553	0.266358	0.269932	0.242591	0.263446	0.305422	0.340661	0.331504	0.33621	0.238502	0.11967	-0.0475287	-0.168224	-0.187483	-0.11322	0.0488391	0.224036	0.324914	0.280292	0.16468	0.0291426	-0.0369623	-0.0231052	0.0103527	0.0546107	0.0285596
0.391134	0.373323	0.258083	0.134489	0.0444529	0.058394	0.181035	0.356015	0.548111	0.669496	0.745961	0.83422	0.951788	0.981849	0.8936	0.671642	0.450545	0.233983	0.0975194	0.0603917	0.0751975	0.0581583	0.0111696	-0.0141113	0.0334278	0.152481	0.275487	0.320511	0.321457	0.335691	0.375629	0.453866	0.558943	0.631018	0.651065	0.62155	0.56595	0.512533	0.468647	0.415585	0.327148	0.234797	0.197046	0.222655	0.296894	0.367094	0.418631	0.41084	0.360899	0.300391
-0.269338	-0.283307	-0.371841	-0.513804	-0.637373	-0.720762	-0.703832	-0.609633	-0.468942	-0.398498	-0.393025	-0.477946	-0.565747	-0.607858	-0.526743	-0.34661	-0.13438	0.00641076	0.0346798	-0.0486109	-0.13264	-0.208219	-0.216023	-0.214601	-0.253763	-0.39785	-0.597436	-0.720072	-0.663442	-0.436218	-0.0968482	0.25181	0.485825	0.555301	0.570479	0.524553	0.477003	0.453402	0.349701	0.222532	0.0586789	-0.0811784	-0.149389	-0.109239	0.0305026	0.296349	0.56648	0.84115	1.06263	1.18301
0.0439512	0.188236	0.40159	0.670807	0.872085	0.964141	0.961743	0.841034	0.661071	0.417644	0.215439	0.0977694	0.0459067	0.0226424	-0.0300495	-0.09982	-0.135088	-0.122197	-0.0131833	0.127958	0.136068	0.0308278	-0.107908	-0.180834	-0.120802	0.0571869	0.259597	0.443671	0.512407	0.449786	0.299987	0.135996	0.0540782	0.0661705	0.126284	0.165469	0.150889	0.0603023	-0.00479139	0.0342963	0.162296	0.361042	0.496248	0.559854	0.525955	0.551935	0.644166	0.774093	0.909615	0.984328
-0.961789	-1.02498	-1.09957	-1.13761	-1.18965	-1.22955	-1.34245	-1.49559	-1.62295	-1.5776	-1.35982	-1.02434	-0.74491	-0.606388	-0.632137	-0.721904	-0.815241	-0.877306	-0.854816	-0.808235	-0.778659	-0.794825	-0.918607	-1.14743	-1.38944	-1.6041	-1.72481	-1.71965	-1.60301	-1.46619	-1.36477	-1.32983	-1.30789	-1.2394	-1.17927	-1.05947	-0.97012	-0.885534	-0.874104	-0.897426	-0.972307	-1.06037	-1.16225	-1.33074	-1.4871	-1.61201	-1.61504	-1.47465	-1.2778	-1.09353
0.144558	0.109642	0.066307	0.00198891	-0.0668252	-0.157648	-0.252887	-0.348888	-0.47165	-0.590022	-0.568824	-0.429504	-0.241535	-0.0625725	0.101996	0.262989	0.390748	0.575594	0.82242	1.05657	1.12203	1.01513	0.801059	0.59932	0.536069	0.624074	0.764557	0.860835	0.888085	0.848072	0.745104	0.587638	0.456595	0.426824	0.535581	0.774765	1.01668	1.16978	1.05843	0.7185	0.407504	0.223269	0.289695	0.498538	0.750907	0.958565	1.01564	0.955656	0.803518	0.667421
-0.337892	-0.215929	-0.0426193	0.121778	0.352778	0.549694	0.669195	0.614368	0.37238	0.0625663	-0.15927	-0.292368	-0.257469	-0.113556	0.0463922	0.199928	0.30043	0.303706	0.222879	0.07593	-0.156786	-0.402031	-0.552794	-0.580331	-0.395667	-0.0860728	0.211248	0.402143	0.477708	0.469725	0.441093	0.390505	0.373215	0.322042	0.229597	0.13578	0.0942981	0.143297	0.212163	0.333139	0.428889	0.478045	0.479308	0.438174	0.304045	0.100805	-0.123943	-0.247769	-0.248455	-0.193237
0.0879999	0.0107689	-0.0934749	-0.265099	-0.43997	-0.607204	-0.713023	-0.791085	-0.841674	-0.845874	-0.849636	-0.855939	-0.868696	-0.804055	-0.665395	-0.464837	-0.345069	-0.288168	-0.306795	-0.387013	-0.486175	-0.626516	-0.698087	-0.663281	-0.528528	-0.322804	-0.117776	0.10729	0.406898	0.710924	0.952458	1.02836	0.931031	0.726425	0.49849	0.36431	0.338302	0.374141	0.412931	0.358992	0.127616	-0.260505	-0.690138	-0.993756	-1.19367	-1.27573	-1.27963	-1.22042	-1.0611	-0.815226
0.240065	0.0804577	0.00869589	0.0497617	0.199222	0.390108	0.543485	0.630442	0.698425	0.774474	0.828297	0.847937	0.811986	0.679174	0.52698	0.430689	0.378623	0.36972	0.356178	0.326347	0.281701	0.279867	0.303297	0.365085	0.370943	0.34136	0.293419	0.268539	0.288573	0.359806	0.44564	0.549342	0.687978	0.813311	0.956001	1.0762	1.13903	1.14329	1.06371	0.958719	0.783663	0.566184	0.373899	0.290768	0.320469	0.385924	0.466654	0.507568	0.532262	0.517797
-0.0508953	-0.0122965	0.0607047	0.144957	0.208986	0.302468	0.339985	0.306272	0.189486	0.080155	-0.0222359	-0.106743	-0.21699	-0.307756	-0.335828	-0.340111	-0.336168	-0.378928	-0.539885	-0.679297	-0.723331	-0.632429	-0.384281	-0.0269891	0.357108	0.615698	0.707546	0.623144	0.456586	0.190887	-0.11249	-0.40396	-0.639899	-0.697783	-0.599314	-0.369548	-0.20627	-0.105916	-0.135451	-0.167317	-0.11798	-0.0321561	0.0236054	-0.0256905	-0.164419	-0.343761	-0.539699	-0.66387	-0.692645	-0.585379
0.819291	0.815827	0.762774	0.703953	0.598618	0.44798	0.274522	0.189875	0.202138	0.322925	0.362723	0.339537	0.324178	0.301349	0.299608	0.293974	0.279173	0.200661	0.0641664	-0.122986	-0.284513	-0.436178	-0.560792	-0.610809	-0.606215	-0.602845	-0.629696	-0.667023	-0.742973	-0.786579	-0.800142	-0.729869	-0.66192	-0.592927	-0.486128	-0.33733	-0.2041	-0.118929	-0.107269	-0.212306	-0.513669	-0.883602	-1.22127	-1.39872	-1.39122	-1.25453	-1.0911	-0.941459	-0.860882	-0.778295
0.295378	0.144128	0.0803816	0.160733	0.283727	0.448366	0.49916	0.436615	0.330163	0.235645	0.229667	0.240466	0.273902	0.277033	0.36245	0.483404	0.617589	0.729926	0.808461	0.858696	0.913161	0.924282	0.941952	0.979636	1.03467	1.06922	1.01158	0.93155	0.83856	0.733309	0.580209	0.428561	0.248064	0.0627141	-0.0900506	-0.183902	-0.244596	-0.193357	-0.051221	0.136747	0.288547	0.281827	0.167573	-0.00591458	-0.0678715	0.0366446	0.28649	0.550539	0.785843	0.876068
-0.811073	-0.772472	-0.579385	-0.2653	0.0961501	0.402366	0.563152	0.619096	0.61712	0.561509	0.518997	0.451293	0.308211	0.120021	-0.133139	-0.304587	-0.383625	-0.309244	-0.163311	-0.00270649	0.159718	0.278984	0.442097	0.645679	0.907433	1.21126	1.45762	1.59648	1.55245	1.39647	1.21237	1.11978	1.05921	0.933168	0.726253	0.522075	0.310895	0.166534	0.0986867	0.127536	0.241222	0.37338	0.487024	0.560219	0.509231	0.404417	0.311753	0.275096	0.297068	0.328794
-0.367045	-0.309366	-0.272791	-0.220852	-0.168525	-0.0976356	-0.046661	-0.00392695	0.0823286	0.191528	0.313372	0.43347	0.55266	0.64943	0.707249	0.729446	0.716957	0.647958	0.518881	0.364289	0.1743	0.0340959	-0.00650148	0.113598	0.291403	0.407892	0.415795	0.278968	0.116411	0.0199979	0.0846101	0.230376	0.397256	0.478895	0.433466	0.323796	0.173118	0.0750624	0.00271266	-0.03002	-0.02291	0.00679963	0.0752807	0.186519	0.298516	0.416975	0.518743	0.576374	0.570483	0.506827
0.220187	0.138129	0.000889217	-0.201291	-0.430458	-0.670499	-0.872702	-1.00809	-1.04844	-0.95625	-0.796877	-0.603527	-0.457651	-0.399916	-0.469563	-0.576208	-0.689043	-0.71827	-0.587038	-0.294152	0.0614285	0.24726	0.192202	-0.165062	-0.699401	-1.2434	-1.62557	-1.82866	-1.8743	-1.89676	-1.94207	-2.03391	-2.08497	-2.02941	-1.84635	-1.57225	-1.22093	-0.929858	-0.724499	-0.573047	-0.475212	-0.334091	-0.168114	0.0201861	0.141529	0.137261	0.0133082	-0.117733	-0.117696	-0.0363878
-1.18468	-1.226	-1.26016	-1.29392	-1.27773	-1.1997	-1.08973	-0.995472	-0.962436	-0.909049	-0.799277	-0.622135	-0.428069	-0.282098	-0.256304	-0.341682	-0.471399	-0.579639	-0.635141	-0.657875	-0.662345	-0.712665	-0.814986	-0.923665	-1.02566	-1.17512	-1.36979	-1.56877	-1.74147	-1.81065	-1.79016	-1.6732	-1.51492	-1.39203	-1.35858	-1.37356	-1.39248	-1.40373	-1.43702	-1.51522	-1.63335	-1.7367	-1.81009	-1.90678	-1.98655	-2.13109	-2.3528	-2.64701	-2.8729	-2.9337
0.886822	0.7646	0.586979	0.398295	0.261689	0.233747	0.271423	0.369749	0.483476	0.507903	0.482015	0.474512	0.472597	0.551242	0.688825	0.80039	0.827804	0.754971	0.640601	0.505279	0.401019	0.313293	0.299504	0.274421	0.199572	0.207246	0.265156	0.408862	0.620686	0.809148	0.908598	0.84135	0.552771	0.0729322	-0.419326	-0.747802	-0.825112	-0.66916	-0.413797	-0.176551	-0.0233387	0.0392019	0.138463	0.234339	0.356766	0.419622	0.424371	0.329291	0.0963611	-0.223577
-1.26936	-1.17477	-1.11289	-1.02346	-0.887742	-0.758777	-0.62063	-0.484138	-0.342322	-0.22629	-0.168173	-0.167908	-0.268496	-0.420779	-0.591162	-0.715388	-0.827905	-0.90734	-0.900442	-0.852112	-0.811889	-0.809432	-0.853779	-0.925049	-0.961071	-0.957805	-0.916866	-0.88587	-0.928992	-1.00254	-1.06418	-1.05431	-0.984041	-0.832459	-0.636518	-0.35712	-0.108854	0.0522783	0.157295	0.181207	0.154093	0.118417	0.115387	0.136766	0.156466	0.123626	0.0586713	-0.0440179	-0.146656	-0.211809
0.639979	0.575089	0.496424	0.431064	0.439668	0.59967	0.841908	1.11848	1.32445	1.46304	1.50729	1.50203	1.45397	1.34424	1.15726	0.943623	0.744053	0.577791	0.447975	0.437273	0.546104	0.696598	0.855568	0.94616	0.977101	0.975102	0.96174	0.951437	0.875019	0.714187	0.471143	0.251636	0.117849	0.0841581	0.0577468	-0.0271044	-0.15282	-0.272243	-0.412538	-0.523888	-0.631199	-0.717167	-0.788461	-0.727388	-0.552305	-0.295467	-0.00675069	0.290358	0.536614	0.73072
-0.336796	-0.231346	-0.12062	0.00291733	0.131921	0.267815	0.442141	0.528798	0.540926	0.489182	0.450297	0.388323	0.268473	0.112441	-0.0486457	-0.111407	-0.11755	-0.0878563	-0.162298	-0.260792	-0.307767	-0.264653	-0.280176	-0.358651	-0.492645	-0.622768	-0.712464	-0.784335	-0.797637	-0.824373	-0.86126	-0.845821	-0.772317	-0.602755	-0.375231	-0.100428	0.153364	0.367889	0.504226	0.52666	0.431904	0.235621	-0.00758796	-0.185971	-0.241256	-0.172592	-0.0773963	0.012584	0.0397962	-0.00910445
-1.15628	-1.30308	-1.36472	-1.27726	-1.0781	-0.823584	-0.619968	-0.494355	-0.451118	-0.45601	-0.517014	-0.52474	-0.572001	-0.580637	-0.52557	-0.50041	-0.584326	-0.784323	-1.0429	-1.28961	-1.39524	-1.33816	-1.12199	-0.835938	-0.519729	-0.112599	0.286593	0.559187	0.588024	0.357307	0.0169832	-0.327405	-0.536414	-0.552264	-0.412236	-0.217442	-0.0627425	-0.0141698	-0.0236698	-0.0119995	0.079233	0.261232	0.435163	0.553381	0.647276	0.733475	0.794539	0.805134	0.726761	0.592342
0.36232	0.205996	0.0885231	0.0234442	0.0456649	0.122112	0.163378	0.124104	0.0664146	0.0075412	-0.0184966	-0.00540942	0.0498271	0.132201	0.231924	0.330054	0.346484	0.322971	0.271705	0.175435	0.112233	0.127402	0.177175	0.225117	0.263007	0.257655	0.165421	-0.0512387	-0.334587	-0.581021	-0.705164	-0.605466	-0.371721	-0.149053	-0.0197718	0.0100452	0.00105114	0.026281	0.0811952	0.145409	0.183039	0.14156	0.034758	-0.111049	-0.169374	-0.169378	-0.14419	-0.108634	-0.0753108	-0.0422641
-0.899086	-0.886965	-0.833157	-0.691933	-0.575656	-0.435662	-0.345243	-0.312429	-0.304461	-0.322362	-0.339858	-0.29373	-0.228212	-0.250918	-0.300378	-0.42883	-0.64689	-0.84089	-0.921732	-0.858489	-0.720095	-0.566903	-0.454733	-0.393213	-0.410642	-0.440358	-0.38307	-0.258747	-0.110074	-0.00760304	-0.132826	-0.449474	-0.818322	-1.09386	-1.27069	-1.24383	-1.07288	-0.757925	-0.354086	0.0411335	0.388876	0.500259	0.409747	0.212322	0.0421132	-0.0946987	-0.212052	-0.275911	-0.278075	-0.205808
-0.631334	-0.660695	-0.719392	-0.808024	-0.927471	-1.01869	-0.986614	-0.795831	-0.503346	-0.194006	0.0182733	0.159906	0.178489	0.111695	-0.0168146	-0.212479	-0.365411	-0.444913	-0.491699	-0.541073	-0.665849	-0.842403	-0.984439	-1.1117	-1.19254	-1.19852	-1.13857	-1.00737	-0.881033	-0.818235	-0.764922	-0.765788	-0.74653	-0.720742	-0.675739	-0.635231	-0.712552	-0.888216	-1.09495	-1.2849	-1.3959	-1.38647	-1.26928	-1.09576	-0.916864	-0.83244	-0.903851	-1.07296	-1.29378	-1.56157
-0.400114	-0.463169	-0.495008	-0.462576	-0.361873	-0.261039	-0.228022	-0.24899	-0.328388	-0.501655	-0.699285	-0.878772	-0.990262	-0.990245	-0.905999	-0.764053	-0.646819	-0.596213	-0.548208	-0.482719	-0.393412	-0.331383	-0.290312	-0.294086	-0.335479	-0.36999	-0.370307	-0.328351	-0.297167	-0.336563	-0.394663	-0.375249	-0.255947	0.017138	0.311996	0.563293	0.704517	0.716111	0.72281	0.762686	0.876337	0.915626	0.841694	0.556123	0.225549	-0.0615012	-0.226647	-0.253009	-0.213326	-0.159417
-0.0487889	-0.103739	-0.110124	-0.0417487	0.0596617	0.173073	0.233547	0.245654	0.186799	0.0992694	0.0610954	0.105821	0.22425	0.357039	0.38732	0.346092	0.209316	0.0616082	-0.0749955	-0.207814	-0.357845	-0.517802	-0.701297	-0.834681	-0.873632	-0.803369	-0.637417	-0.510344	-0.435283	-0.399834	-0.361278	-0.256546	-0.103922	0.0178966	0.0473189	-0.0603618	-0.199781	-0.327192	-0.330739	-0.225833	-0.133342	-0.114753	-0.230879	-0.419867	-0.604686	-0.739389	-0.820399	-0.878328	-0.917885	-0.913679
0.114164	0.191342	0.25193	0.241865	0.166571	0.144387	0.168344	0.223124	0.298135	0.399919	0.510755	0.556999	0.503513	0.389153	0.29224	0.229191	0.203927	0.209992	0.144137	0.0771959	0.0390134	0.0556614	0.103321	0.189011	0.245216	0.236013	0.190423	0.138176	0.152044	0.295442	0.548312	0.838252	1.05699	1.08911	0.893906	0.542043	0.143593	-0.219474	-0.453704	-0.546839	-0.534616	-0.456756	-0.420451	-0.430176	-0.491014	-0.588842	-0.691447	-0.817639	-0.922455	-0.946443
-0.623452	-0.648382	-0.664611	-0.711553	-0.734699	-0.710022	-0.678253	-0.590985	-0.476912	-0.370838	-0.261127	-0.277562	-0.331211	-0.411949	-0.471132	-0.547414	-0.646015	-0.718937	-0.736896	-0.775702	-0.849004	-0.984323	-1.11813	-1.20915	-1.18481	-0.982755	-0.685231	-0.388183	-0.216512	-0.177099	-0.274871	-0.404751	-0.567541	-0.610346	-0.616227	-0.581006	-0.52921	-0.475999	-0.469414	-0.522045	-0.626915	-0.698688	-0.67825	-0.616124	-0.49309	-0.336895	-0.119635	0.154021	0.486921	0.806427
0.763838	0.81117	0.849207	0.932609	1.07554	1.21886	1.31401	1.34589	1.27754	1.1499	0.962956	0.793868	0.631185	0.454266	0.284011	0.106611	-0.0379674	-0.19354	-0.289726	-0.339915	-0.324967	-0.238005	-0.0982319	0.0620698	0.199395	0.250329	0.259096	0.317654	0.380773	0.495766	0.6046	0.774778	0.956235	1.05585	1.02116	0.821362	0.424793	-0.121256	-0.66171	-1.14154	-1.50598	-1.7067	-1.73955	-1.61151	-1.29901	-0.915784	-0.500738	-0.19548	-0.0353633	-0.0554112
-0.0984676	-0.164763	-0.290953	-0.506306	-0.729803	-0.86805	-0.875687	-0.77784	-0.584374	-0.388109	-0.249307	-0.236634	-0.319791	-0.471918	-0.500418	-0.421953	-0.286345	-0.240654	-0.320448	-0.426525	-0.47422	-0.407393	-0.29099	-0.239194	-0.317937	-0.552324	-0.94373	-1.29417	-1.57822	-1.64462	-1.50108	-1.22056	-0.878009	-0.625748	-0.575	-0.680251	-0.876984	-1.0907	-1.19568	-1.18196	-1.14488	-1.12455	-1.19468	-1.34992	-1.50123	-1.56071	-1.52601	-1.44092	-1.38346	-1.41084
0.908683	0.790032	0.623874	0.50013	0.423198	0.41521	0.479272	0.572437	0.547454	0.362489	0.0846463	-0.239359	-0.556952	-0.83378	-1.08754	-1.2831	-1.3673	-1.31964	-1.21367	-1.16493	-1.27219	-1.46589	-1.60603	-1.61036	-1.44028	-1.17116	-0.894691	-0.662212	-0.547488	-0.528159	-0.545078	-0.563378	-0.539917	-0.419266	-0.218721	0.0289512	0.206625	0.296365	0.230405	0.034872	-0.129637	-0.226667	-0.248577	-0.205908	-0.102602	0.00297582	0.108226	0.100576	0.094303	0.0996248
-0.322248	-0.336211	-0.324269	-0.237556	-0.134374	-0.0178687	0.100544	0.19292	0.19317	0.0432594	-0.165641	-0.3518	-0.378208	-0.247142	-0.00972899	0.178607	0.229697	0.170609	0.0734111	0.0100995	0.0713139	0.255473	0.461519	0.652474	0.771719	0.817463	0.774639	0.621391	0.424886	0.257722	0.0781253	-0.0912479	-0.300026	-0.50062	-0.630612	-0.583766	-0.324369	0.128203	0.573068	0.889788	1.04733	1.03002	0.883342	0.668251	0.449841	0.251474	0.126618	0.149532	0.250781	0.363022
-1.07148	-0.999663	-0.771076	-0.442635	-0.0846196	0.226917	0.398766	0.37062	0.199595	-0.0627858	-0.38441	-0.74305	-1.0763	-1.2807	-1.40416	-1.42232	-1.45827	-1.49954	-1.56014	-1.54959	-1.51868	-1.4839	-1.50723	-1.6166	-1.65619	-1.67041	-1.54242	-1.33713	-1.00987	-0.665633	-0.342513	-0.117623	-0.0470091	-0.13495	-0.311868	-0.44566	-0.563808	-0.608975	-0.574572	-0.413736	-0.206231	0.0450549	0.152333	0.073225	-0.195743	-0.552906	-0.778847	-0.899783	-0.910565	-0.889961
-0.756122	-0.59375	-0.435495	-0.296279	-0.167713	-0.0651555	-0.0172162	-0.0589195	-0.0864478	-0.0657222	0.0450903	0.220196	0.3648	0.441498	0.375091	0.184897	-0.0651921	-0.260385	-0.330245	-0.216358	0.0369521	0.317582	0.488678	0.482829	0.327533	0.115332	-0.0764706	-0.264173	-0.345566	-0.40534	-0.452448	-0.468897	-0.432407	-0.285757	-0.105139	0.0767677	0.24776	0.328924	0.297938	0.156766	-0.0241808	-0.200336	-0.283094	-0.292335	-0.210568	-0.127788	-0.0845974	-0.0405614	0.00606653	0.0458341
-0.0936285	-0.118945	-0.0400471	0.129953	0.352925	0.531607	0.640903	0.674903	0.679684	0.69898	0.748625	0.73167	0.595045	0.394402	0.217077	0.161002	0.218583	0.32428	0.398287	0.401787	0.347846	0.29544	0.336182	0.44154	0.614645	0.795225	0.94568	1.01572	1.06535	1.00579	0.884047	0.719339	0.571967	0.525866	0.575021	0.640681	0.673179	0.587785	0.38362	0.195598	0.0806816	0.110528	0.233448	0.406276	0.609521	0.823635	1.04501	1.21362	1.31276	1.34878
0.589302	0.337306	0.108526	-0.0257614	0.015694	0.149108	0.260516	0.244099	0.131343	0.00262614	-0.0989224	-0.210014	-0.377363	-0.602651	-0.810982	-0.875641	-0.765247	-0.602654	-0.460206	-0.425795	-0.416872	-0.388064	-0.289845	-0.132735	0.00839984	0.0659081	-0.0102374	-0.144875	-0.261252	-0.303248	-0.285405	-0.266805	-0.232124	-0.241353	-0.270567	-0.303723	-0.314039	-0.341302	-0.334359	-0.309002	-0.245819	-0.199497	-0.199192	-0.161261	-0.0735044	0.0870511	0.303426	0.50312	0.593918	0.539642
-0.446634	-0.429174	-0.424393	-0.423168	-0.361387	-0.14939	0.147356	0.490923	0.738934	0.889724	0.977367	1.0169	1.00773	0.941968	0.90087	0.792631	0.662951	0.493018	0.389569	0.360179	0.39876	0.485139	0.542819	0.501215	0.362581	0.167109	-0.0312222	-0.181508	-0.346612	-0.519529	-0.687466	-0.767267	-0.765842	-0.648245	-0.50031	-0.347703	-0.189057	-0.0121663	0.232438	0.497328	0.686362	0.770795	0.692223	0.548534	0.443601	0.404193	0.410885	0.376221	0.297339	0.210919
0.789526	0.387622	-0.0387252	-0.505039	-0.854932	-0.97773	-0.899974	-0.694945	-0.429218	-0.16519	0.0840263	0.273093	0.390113	0.463887	0.522165	0.5449	0.507056	0.395349	0.254879	0.0819499	-0.109024	-0.202514	-0.197179	-0.0754994	0.057478	0.159951	0.258267	0.2279	0.121872	-0.00973639	-0.0907152	-0.085901	0.0391264	0.130218	0.171409	0.193389	0.267638	0.381934	0.518686	0.630609	0.737437	0.893951	1.06425	1.20626	1.26257	1.1733	0.999405	0.80101	0.701854	0.741854
-0.00608699	-0.00514953	0.0198838	0.0885093	0.176109	0.278043	0.396486	0.513161	0.579156	0.603844	0.588807	0.565734	0.514258	0.442489	0.327254	0.129883	-0.0931458	-0.233233	-0.32953	-0.412536	-0.470823	-0.447678	-0.347135	-0.192154	-0.0320065	0.0790268	0.0892593	-0.00513353	-0.116465	-0.145621	-0.103345	-0.0577919	-0.080081	-0.170395	-0.251082	-0.299466	-0.258209	-0.139005	-0.0226579	0.0550188	0.107385	0.147426	0.16938	0.172517	0.144767	0.127274	0.132676	0.177563	0.22451	0.239811
0.0740561	0.328755	0.556766	0.719035	0.804898	0.837719	0.871313	0.91269	0.981818	0.979309	0.852195	0.625379	0.358932	0.0889415	-0.176763	-0.406081	-0.588792	-0.680673	-0.697108	-0.595677	-0.470421	-0.384376	-0.347735	-0.361541	-0.35664	-0.237218	-0.0387001	0.174495	0.395796	0.545029	0.556737	0.38972	0.0875069	-0.221099	-0.372309	-0.403757	-0.300177	-0.179735	-0.109055	-0.0532118	-0.0491122	-0.0577965	-0.0797892	-0.200228	-0.422048	-0.681171	-0.869649	-0.906449	-0.764104	-0.559949
-0.783454	-0.811198	-0.703015	-0.458638	-0.0609117	0.428719	0.887958	1.20493	1.29995	1.20062	1.00699	0.851502	0.69673	0.554428	0.328869	0.0719799	-0.227082	-0.438999	-0.549778	-0.548032	-0.490173	-0.44221	-0.380147	-0.309572	-0.227159	-0.204178	-0.186181	-0.225386	-0.268432	-0.304399	-0.32965	-0.392723	-0.437027	-0.515126	-0.524742	-0.524028	-0.518577	-0.564606	-0.681774	-0.827238	-0.968611	-1.04729	-1.13349	-1.23288	-1.34082	-1.36819	-1.32169	-1.19485	-0.996427	-0.813315
0.385001	0.141128	-0.00303245	-0.0575779	0.0231002	0.176688	0.348215	0.475386	0.578106	0.659695	0.716068	0.67209	0.54932	0.311868	0.0894792	-0.101131	-0.241401	-0.308219	-0.338586	-0.353894	-0.354148	-0.380433	-0.388167	-0.404748	-0.362814	-0.233345	-0.030109	0.13132	0.11357	-0.064545	-0.271254	-0.365528	-0.374607	-0.258339	-0.127653	0.00832395	0.120918	0.20235	0.285926	0.302968	0.240123	0.0991867	-0.0116711	-0.0833728	-0.110141	-0.0615756	0.0656682	0.282825	0.594415	0.904189
-0.40087	-0.469713	-0.486312	-0.434456	-0.375583	-0.356724	-0.439258	-0.536348	-0.532896	-0.382935	-0.18026	-0.0836097	-0.0992268	-0.251245	-0.359968	-0.384907	-0.27016	-0.0805795	0.112092	0.26703	0.358134	0.414624	0.376804	0.238188	-0.00197321	-0.240509	-0.423264	-0.543638	-0.614409	-0.632329	-0.557932	-0.321064	-0.0208387	0.223452	0.28005	0.139042	-0.12618	-0.413073	-0.619343	-0.715339	-0.732433	-0.690695	-0.596811	-0.487075	-0.422629	-0.389789	-0.397366	-0.393681	-0.452589	-0.53138
1.33411	1.03477	0.745508	0.524323	0.425097	0.418499	0.382001	0.253336	0.0931233	-0.0437651	-0.0431176	0.10608	0.290416	0.453223	0.600391	0.717486	0.778236	0.763744	0.628192	0.381571	0.0750046	-0.156677	-0.301219	-0.258214	-0.0898333	0.142345	0.320471	0.470221	0.571983	0.609895	0.592535	0.484152	0.221973	-0.151746	-0.513817	-0.718215	-0.723114	-0.533988	-0.265947	-0.117102	-0.102128	-0.135303	-0.0878372	0.0392279	0.188158	0.280005	0.335472	0.368167	0.439163	0.527262
0.33292	0.379196	0.410689	0.338578	0.161063	-0.0683874	-0.210812	-0.13183	0.206582	0.654719	1.06914	1.27274	1.23381	1.02482	0.731936	0.464371	0.253288	0.109992	0.04447	0.0603984	0.108542	0.0946752	0.0385625	-0.0802578	-0.187575	-0.291834	-0.330522	-0.314549	-0.300827	-0.332307	-0.370459	-0.31202	-0.19177	0.0185288	0.165049	0.210224	0.117815	0.00610862	-0.0367188	-0.0044138	0.0371931	0.081538	0.0571455	-0.0596429	-0.181836	-0.279589	-0.32275	-0.381552	-0.407647	-0.476681
0.552683	0.476291	0.462257	0.468352	0.451555	0.387008	0.272628	0.135963	0.0501869	0.035176	0.108121	0.178878	0.154343	0.0698418	-0.0243689	-0.0647976	-0.0359665	0.083229	0.237956	0.405622	0.591538	0.788125	0.918016	0.912919	0.782781	0.606979	0.398541	0.251681	0.129975	-0.0301291	-0.2568	-0.452804	-0.580628	-0.581944	-0.449968	-0.27923	-0.056236	0.132648	0.257564	0.343742	0.43046	0.544085	0.67587	0.749341	0.759231	0.677559	0.539602	0.448062	0.477672	0.64238
1.2052	1.37568	1.44307	1.31159	0.987774	0.645454	0.481157	0.555135	0.807887	1.07404	1.16862	1.18213	1.11386	1.16052	1.23681	1.37165	1.51492	1.57063	1.51318	1.30973	1.05724	0.846017	0.781447	0.832205	0.98451	1.09093	0.999905	0.783694	0.472034	0.179998	-0.00113107	-0.128795	-0.12531	-0.139866	-0.133722	-0.142426	-0.0571194	0.0590031	0.225788	0.296962	0.193832	-0.0470337	-0.334445	-0.568399	-0.644097	-0.508059	-0.193955	0.0932069	0.293525	0.338798
-0.226701	-0.207973	-0.189656	-0.215864	-0.263194	-0.300664	-0.315832	-0.336601	-0.402286	-0.540242	-0.72696	-0.900705	-1.03455	-1.03783	-0.931379	-0.715358	-0.523147	-0.418423	-0.439118	-0.500144	-0.576118	-0.565028	-0.479751	-0.347565	-0.260963	-0.281144	-0.283274	-0.23147	-0.0291387	0.223893	0.476635	0.634485	0.718087	0.732104	0.713865	0.656798	0.556188	0.466912	0.413347	0.420748	0.460495	0.461362	0.362181	0.161056	-0.0527111	-0.258523	-0.449232	-0.620521	-0.751038	-0.937323
0.263234	0.234562	0.276838	0.377849	0.511901	0.542505	0.467822	0.295341	0.106288	-0.045208	-0.107787	-0.0110793	0.133767	0.20483	0.154916	0.00668657	-0.172226	-0.218251	-0.0433791	0.252264	0.419221	0.445845	0.304309	0.014312	-0.291609	-0.4817	-0.544762	-0.56149	-0.53759	-0.485346	-0.36411	-0.23227	-0.149758	-0.151796	-0.193708	-0.225072	-0.198094	-0.0886085	0.0158132	0.132464	0.215131	0.27412	0.280731	0.237856	0.133514	0.0324071	-0.000432943	-0.0404189	-0.0772832	-0.117598
-0.384222	-0.23583	-0.142363	-0.120757	-0.117374	-0.108412	-0.0470386	0.0253874	0.189578	0.327031	0.395646	0.371464	0.285708	0.154616	0.0544121	0.0992054	0.196539	0.282199	0.272918	0.186511	-0.0138018	-0.277921	-0.564208	-0.7351	-0.839825	-0.799598	-0.603762	-0.291869	0.0589332	0.42145	0.736382	0.981131	1.10072	1.06122	0.993147	0.865249	0.744851	0.567317	0.360229	0.142474	-0.039004	-0.189018	-0.288838	-0.306666	-0.281134	-0.292021	-0.459447	-0.740003	-1.05772	-1.27982
-0.779329	-0.652874	-0.591551	-0.547204	-0.498195	-0.397338	-0.253401	-0.0941098	0.0804177	0.201043	0.296808	0.372716	0.436786	0.413917	0.20931	-0.135716	-0.527083	-0.893061	-1.13146	-1.23788	-1.27173	-1.31653	-1.35525	-1.37622	-1.28501	-1.05694	-0.712855	-0.344144	-0.0320713	0.212813	0.350501	0.374319	0.295939	0.238656	0.179029	0.10383	-0.0363947	-0.144503	-0.211479	-0.20087	-0.126381	-0.0175329	0.13944	0.314062	0.441652	0.482289	0.420072	0.306322	0.187644	0.102975
-0.554377	-0.311547	-0.0291204	0.325297	0.675588	0.999441	1.18289	1.26789	1.2159	1.09473	0.928697	0.872291	0.945894	1.14848	1.38895	1.57043	1.57187	1.3709	1.09146	0.83438	0.699035	0.689343	0.804935	0.951706	1.06881	1.16187	1.19025	1.1597	1.13599	1.11147	1.05662	0.865486	0.59567	0.353241	0.254604	0.323902	0.485161	0.633955	0.653462	0.602224	0.510486	0.393013	0.213517	-0.0738825	-0.409991	-0.691755	-0.88486	-0.934374	-0.782913	-0.501404
-0.0795382	-0.00218271	0.0823175	0.168539	0.23642	0.270206	0.298846	0.288159	0.261922	0.209401	0.115417	-0.00111968	-0.150149	-0.227974	-0.194422	-0.0176449	0.195042	0.388474	0.454199	0.433186	0.387298	0.327679	0.267926	0.220956	0.150917	0.17228	0.232269	0.299341	0.394157	0.398072	0.357412	0.282967	0.236807	0.169261	0.177948	0.225681	0.34039	0.45649	0.564389	0.569415	0.465004	0.284855	0.141177	0.081478	0.0458292	-0.0429915	-0.20669	-0.409056	-0.645815	-0.817897
1.08868	1.22439	1.24488	1.15257	1.01222	0.927574	0.943495	0.971015	0.978474	0.967281	0.91487	0.78666	0.646567	0.499742	0.360764	0.213239	0.0972585	0.0622759	0.131713	0.293247	0.509329	0.6849	0.822605	0.859449	0.83964	0.735713	0.55231	0.389995	0.313689	0.323799	0.389137	0.491543	0.578278	0.625433	0.655751	0.666342	0.597576	0.462281	0.318721	0.259235	0.308075	0.435544	0.616151	0.802196	0.950165	1.04961	1.08491	1.06622	1.02139	0.992258
-0.193004	0.126507	0.394718	0.626745	0.744833	0.778799	0.72065	0.611719	0.486085	0.405012	0.385639	0.44442	0.525836	0.568208	0.578235	0.507553	0.353894	0.195099	0.12667	0.148461	0.241998	0.369182	0.485728	0.540299	0.554036	0.477072	0.322064	0.126534	-0.0914679	-0.301758	-0.513852	-0.642347	-0.62618	-0.533213	-0.426997	-0.327825	-0.306789	-0.31567	-0.340144	-0.324201	-0.3333	-0.35698	-0.373115	-0.325648	-0.197048	-0.0278312	0.0694463	0.0374673	-0.0905026	-0.283898
-0.494376	-0.444772	-0.400333	-0.353615	-0.297502	-0.170031	-0.0467907	0.00331813	-0.020776	-0.146614	-0.281921	-0.377322	-0.458834	-0.549193	-0.622985	-0.678301	-0.666908	-0.570335	-0.416855	-0.225641	-0.00749977	0.168559	0.245831	0.20038	0.125871	0.0867395	0.0641035	0.0103334	-0.11716	-0.33546	-0.566591	-0.738747	-0.83812	-0.830064	-0.689914	-0.478657	-0.233127	-0.121565	-0.107362	-0.136837	-0.180051	-0.202671	-0.187228	-0.217439	-0.313851	-0.436979	-0.508593	-0.42907	-0.160291	0.189106
0.461261	0.6451	0.740618	0.711824	0.527742	0.278443	0.012846	-0.197976	-0.262671	-0.172894	0.0383483	0.345874	0.679827	1.03282	1.37414	1.60337	1.65982	1.57783	1.35892	1.09929	0.817725	0.596613	0.473557	0.411731	0.387773	0.374798	0.319689	0.183404	0.0980756	0.1501	0.303105	0.42027	0.476735	0.45181	0.318875	0.0800613	-0.17924	-0.363954	-0.4603	-0.41106	-0.207837	0.0894967	0.392223	0.572899	0.606651	0.553227	0.48192	0.369392	0.226107	0.0896684
0.716582	0.753404	0.825757	0.917057	0.972434	0.979394	0.920047	0.897485	0.896845	0.970129	1.06256	1.10319	1.12292	1.14234	1.09222	1.05081	0.98793	0.92737	0.909909	0.853921	0.788514	0.660039	0.48093	0.319548	0.178669	0.0218947	-0.0718772	-0.0731342	0.0314385	0.245747	0.484954	0.646139	0.67766	0.601177	0.564095	0.56703	0.622724	0.721615	0.776694	0.733734	0.608822	0.472666	0.403115	0.444967	0.533168	0.574112	0.480222	0.359488	0.274152	0.257049
-0.50639	-0.631253	-0.733996	-0.78946	-0.769481	-0.720491	-0.699515	-0.692366	-0.685075	-0.593641	-0.379714	-0.086896	0.154256	0.263012	0.208001	0.0928536	-0.0110749	-0.0225801	-0.0242609	0.0444056	0.187619	0.391009	0.623522	0.787497	0.872503	0.796616	0.640547	0.4786	0.338172	0.187001	-0.0259835	-0.235384	-0.338	-0.27691	-0.153072	0.0400691	0.238386	0.369214	0.41062	0.379403	0.292239	0.177084	0.0816569	0.0604833	0.0996846	0.203887	0.298939	0.339565	0.265654	0.0876767
0.493326	0.193896	-0.0989461	-0.400319	-0.673725	-0.819946	-0.812858	-0.703269	-0.517215	-0.41091	-0.308479	-0.249632	-0.233172	-0.223019	-0.266784	-0.334853	-0.452184	-0.591374	-0.791902	-0.937768	-0.974914	-0.935827	-0.855719	-0.828974	-0.835397	-0.860184	-0.830156	-0.729427	-0.476389	-0.191566	0.0496886	0.19807	0.230391	0.193696	0.111728	0.0286022	-0.0322014	-0.10649	-0.220691	-0.320659	-0.35492	-0.281301	-0.078905	0.159404	0.405829	0.65461	0.817421	0.838299	0.796452	0.755829
0.100648	-0.00127289	-0.0901385	-0.222109	-0.329721	-0.463732	-0.547365	-0.53443	-0.415208	-0.292096	-0.206654	-0.278981	-0.432861	-0.615987	-0.726599	-0.662604	-0.446634	-0.164111	0.124801	0.281363	0.305589	0.155135	-0.166472	-0.576763	-0.973402	-1.28468	-1.44607	-1.40673	-1.25474	-1.07405	-0.8788	-0.720198	-0.580878	-0.519914	-0.529365	-0.642823	-0.804029	-0.926367	-0.967913	-0.907681	-0.758143	-0.635053	-0.585378	-0.588698	-0.571928	-0.527642	-0.438986	-0.354813	-0.352358	-0.394519
-0.730793	-0.466284	-0.285908	-0.218913	-0.228656	-0.21972	-0.124409	0.0773534	0.284357	0.459517	0.545064	0.51162	0.421065	0.304913	0.170957	0.0773542	0.0538921	0.0962345	0.22203	0.302535	0.297108	0.229014	0.192061	0.248735	0.451086	0.745054	1.08045	1.36337	1.54448	1.6069	1.55102	1.40361	1.22159	1.0217	0.853159	0.710569	0.623471	0.619651	0.689702	0.764154	0.754157	0.679616	0.566772	0.460835	0.388641	0.425129	0.516859	0.526664	0.464423	0.365351
-0.751251	-0.695746	-0.634261	-0.58547	-0.552061	-0.468322	-0.331118	-0.197227	-0.0963609	-0.0950633	-0.189492	-0.291448	-0.389094	-0.331011	-0.191218	-0.0966001	-0.0489045	-0.0226684	0.0064977	0.0555153	0.128553	0.101503	0.0143602	-0.00349411	0.10845	0.29819	0.463822	0.5676	0.597902	0.607678	0.638123	0.684522	0.708877	0.744244	0.753953	0.853489	0.926073	0.944623	0.831622	0.589114	0.312296	0.119105	0.109986	0.27464	0.577381	0.906985	1.2411	1.47901	1.55344	1.4648
-0.128008	-0.119468	-0.139452	-0.132286	-0.0756179	0.0216761	0.0636047	0.0887715	0.0222718	-0.10855	-0.209701	-0.232215	-0.171953	-0.147064	-0.204513	-0.249973	-0.290504	-0.331953	-0.258725	-0.0958662	0.0796678	0.192267	0.207624	0.113279	0.0045623	0.0266986	0.210914	0.547906	0.865424	1.05553	1.06073	0.930947	0.764484	0.661384	0.54243	0.413121	0.279493	0.100145	-0.118433	-0.312031	-0.439423	-0.534405	-0.604074	-0.697046	-0.778679	-0.782765	-0.680621	-0.516908	-0.325022	-0.235953
-0.468539	-0.429361	-0.381749	-0.305909	-0.251118	-0.253473	-0.397598	-0.631288	-0.856675	-0.994228	-0.982398	-0.800996	-0.480618	-0.189714	0.0155848	0.112041	0.201327	0.316874	0.419598	0.448973	0.428455	0.3451	0.339075	0.441572	0.608077	0.771835	0.773297	0.701486	0.532317	0.386782	0.265332	0.217664	0.202083	0.140387	0.00417403	-0.212381	-0.477765	-0.708398	-0.837664	-0.803114	-0.669329	-0.492031	-0.374731	-0.403398	-0.50087	-0.631967	-0.728008	-0.762701	-0.737461	-0.634122
-0.756745	-0.624883	-0.45238	-0.319788	-0.240474	-0.291448	-0.450452	-0.627079	-0.753561	-0.726311	-0.597609	-0.436512	-0.296206	-0.210935	-0.234572	-0.36138	-0.571561	-0.724765	-0.779909	-0.728331	-0.606219	-0.436432	-0.273212	-0.131459	-0.00358846	0.105353	0.147174	0.0700599	-0.0903561	-0.247469	-0.311641	-0.232666	-0.0877872	0.0487348	0.12093	0.14681	0.141584	0.172236	0.205006	0.211672	0.197637	0.177354	0.180757	0.23916	0.335187	0.425257	0.50065	0.507679	0.474119	0.422151
0.358653	0.57196	0.745938	0.918184	0.997085	1.06069	1.10454	1.09428	1.08687	0.986467	0.874008	0.720562	0.655678	0.554161	0.371355	0.117659	-0.147523	-0.309076	-0.353405	-0.30116	-0.265704	-0.201879	-0.143098	-0.0929985	-0.0724377	-0.0587554	-0.125262	-0.15737	-0.129715	-0.0423962	0.167055	0.450147	0.791438	1.11717	1.27091	1.18772	0.901438	0.548159	0.208007	0.0380487	0.0456719	0.158322	0.235098	0.242031	0.197663	0.231106	0.367792	0.520315	0.665593	0.709159
-1.08583	-0.96292	-0.837165	-0.604681	-0.315032	0.0134823	0.332637	0.469734	0.463656	0.330972	0.124821	0.0076407	-0.0266065	0.010374	0.160781	0.267694	0.257781	0.169819	0.0652477	-0.00550636	-0.0337741	-0.0237742	0.0856046	0.213347	0.312001	0.392199	0.364635	0.252105	0.0971345	0.0235065	0.0961294	0.302437	0.562025	0.803758	0.898195	0.778196	0.447806	-0.0323512	-0.490299	-0.746248	-0.75555	-0.546166	-0.275643	0.00665885	0.197058	0.31848	0.366555	0.344216	0.332634	0.301174
0.335607	-0.0200349	-0.361543	-0.707328	-1.01667	-1.17257	-1.12173	-0.818263	-0.404505	-0.0354607	0.208828	0.221424	0.0495684	-0.227776	-0.492845	-0.6521	-0.664408	-0.59747	-0.422205	-0.226727	-0.0889422	0.0196587	0.128671	0.178846	0.176344	0.110431	0.00726553	-0.049659	-0.0712973	-0.0683492	-0.111788	-0.184528	-0.211617	-0.16352	0.0207966	0.314851	0.587573	0.769414	0.748011	0.508115	0.0659852	-0.377523	-0.697126	-0.833915	-0.816994	-0.735294	-0.575745	-0.42043	-0.209557	-0.0519033
0.0742328	-0.0946356	-0.24439	-0.299969	-0.259015	-0.112891	0.0508332	0.142299	0.118998	0.00883763	-0.123332	-0.225288	-0.261617	-0.235063	-0.216302	-0.287481	-0.444655	-0.659112	-0.743276	-0.70939	-0.597935	-0.412034	-0.222001	-0.0355886	0.131977	0.24789	0.296721	0.292474	0.25487	0.28722	0.366586	0.409898	0.408992	0.416974	0.46296	0.635651	0.855851	1.08228	1.27067	1.29354	1.23732	1.15999	1.02999	0.968355	0.922815	0.821766	0.659361	0.505218	0.341463	0.227436
-0.504073	-0.293903	-0.109566	-0.0796311	-0.204844	-0.428658	-0.666494	-0.868363	-0.998846	-1.01859	-0.917247	-0.749772	-0.56331	-0.375473	-0.209375	-0.0730882	-0.000117811	-0.0456404	-0.198681	-0.472865	-0.766563	-1.01675	-1.19335	-1.28094	-1.28151	-1.17944	-1.00174	-0.797519	-0.634877	-0.519145	-0.443466	-0.357795	-0.201616	-0.0706638	0.0332203	0.0559707	-0.0190949	-0.221588	-0.525532	-0.762053	-0.841147	-0.68988	-0.275325	0.249305	0.691981	0.860633	0.799453	0.598576	0.331558	0.0201108
1.14504	1.00051	0.851145	0.750179	0.650403	0.557001	0.439516	0.34278	0.293903	0.334883	0.380403	0.396819	0.317371	0.246418	0.208058	0.215807	0.255692	0.258205	0.200434	0.103225	0.0105377	-0.0317095	0.0214097	0.0635748	0.0353763	-0.0718068	-0.204344	-0.243281	-0.185423	0.00215981	0.175894	0.27351	0.264415	0.180804	0.0711442	-0.00763683	-0.0227941	-0.027757	-0.016783	-0.0418485	-0.142374	-0.265076	-0.338616	-0.348304	-0.287664	-0.245135	-0.20554	-0.190496	-0.18005	-0.184852
0.461549	0.620259	0.78746	0.91628	0.923832	0.770654	0.537772	0.371883	0.301201	0.321987	0.353346	0.386484	0.372879	0.388133	0.428382	0.486043	0.579092	0.673255	0.770932	0.82131	0.819888	0.748373	0.7137	0.72587	0.807897	0.940017	1.06242	1.07611	0.981207	0.760407	0.507758	0.27359	0.122372	0.0921324	0.188935	0.330971	0.497777	0.637151	0.73488	0.828784	0.914095	1.02211	1.11484	1.13191	1.06727	0.936021	0.812112	0.747331	0.798664	0.887347
0.00376836	0.00293804	0.00574914	0.0552838	0.126459	0.208699	0.307283	0.401188	0.415417	0.33917	0.180042	0.092755	0.0650382	0.147435	0.27712	0.419072	0.416134	0.345707	0.236187	0.2011	0.278891	0.426829	0.548332	0.650094	0.686071	0.725144	0.729782	0.617719	0.438963	0.275877	0.208224	0.238453	0.31692	0.440831	0.559217	0.647487	0.722739	0.804299	0.909776	1.03702	1.13278	1.16654	1.12897	1.03128	0.904814	0.807963	0.694338	0.500302	0.322171	0.143439
0.41951	0.212673	-0.00934457	-0.215006	-0.412932	-0.534688	-0.613758	-0.635728	-0.574615	-0.428881	-0.216885	0.010647	0.208512	0.402648	0.638095	0.757811	0.708687	0.45109	0.184656	0.108087	0.323269	0.729895	1.17041	1.41762	1.36163	1.11261	0.749206	0.335974	0.0308676	-0.156353	-0.314172	-0.360732	-0.245408	0.0727436	0.526144	1.05265	1.51546	1.82096	1.91372	1.87078	1.74026	1.54596	1.35167	1.13328	0.908102	0.7754	0.734617	0.843486	1.02051	1.1824
-0.682366	-0.417327	-0.129088	0.108542	0.239561	0.22421	0.13523	0.0224293	-0.0324936	0.0524277	0.259433	0.49914	0.704748	0.789107	0.715849	0.512368	0.277804	0.0521883	-0.131821	-0.264551	-0.283404	-0.188154	0.0431707	0.416667	0.811997	1.13395	1.30983	1.38976	1.38984	1.35929	1.26227	1.16165	0.986236	0.799914	0.605692	0.499708	0.480062	0.471865	0.46003	0.450779	0.518272	0.658909	0.830613	0.926168	0.891281	0.786558	0.653949	0.562164	0.464866	0.370308
0.188889	0.245246	0.315986	0.362928	0.316874	0.266622	0.205186	0.126377	0.048103	0.0340924	0.0922877	0.219148	0.330283	0.431635	0.498023	0.51323	0.521179	0.521368	0.511638	0.483015	0.409854	0.313191	0.252094	0.244713	0.327875	0.4491	0.505901	0.508477	0.46287	0.463456	0.505834	0.575134	0.633996	0.654799	0.624319	0.635969	0.683823	0.735883	0.802569	0.870098	0.965476	1.07086	1.14735	1.16716	1.12838	1.03243	0.924225	0.789448	0.630947	0.520228
-0.650585	-0.703358	-0.760925	-0.866581	-0.941281	-0.99729	-0.976829	-0.839972	-0.615153	-0.353195	-0.0804218	0.0876136	0.122952	0.0778164	-0.0912772	-0.244538	-0.354032	-0.390982	-0.376283	-0.328519	-0.294927	-0.277601	-0.302781	-0.344531	-0.395909	-0.478839	-0.55362	-0.596387	-0.579708	-0.388524	-0.114003	0.171052	0.431366	0.557126	0.570145	0.453022	0.32454	0.300138	0.333628	0.419642	0.510933	0.591581	0.593281	0.494127	0.282198	0.0265195	-0.177433	-0.245741	-0.144441	0.00947023
0.705363	0.824305	0.974207	1.12919	1.31432	1.47519	1.5952	1.60456	1.57331	1.49143	1.41328	1.31349	1.18172	1.07129	0.99489	0.897236	0.858156	0.803061	0.759086	0.734937	0.712814	0.724137	0.733434	0.744936	0.793265	0.900544	1.00789	1.08445	1.07334	0.978087	0.807838	0.59032	0.375752	0.126192	-0.123105	-0.358221	-0.542063	-0.656521	-0.639987	-0.539146	-0.334189	-0.0966159	0.101455	0.158897	0.0763084	-0.045733	-0.128327	-0.124389	-0.108184	-0.0967401
-1.23526	-1.24933	-1.25353	-1.24915	-1.20952	-1.13898	-1.05935	-1.00677	-1.03521	-1.17001	-1.39891	-1.6843	-1.98568	-2.28205	-2.5489	-2.77237	-2.93368	-3.03653	-3.08606	-3.09414	-3.02456	-2.84798	-2.54255	-2.08304	-1.48188	-0.813679	-0.22106	0.156403	0.223205	0.0165164	-0.31662	-0.596239	-0.736045	-0.778981	-0.803664	-0.875975	-1.01099	-1.18433	-1.37086	-1.55833	-1.7399	-1.88734	-1.98377	-2.02493	-2.02422	-1.98419	-1.89596	-1.76147	-1.57113	-1.3595
-0.176019	-0.215741	-0.261636	-0.303258	-0.337283	-0.3555	-0.366813	-0.369107	-0.366021	-0.355852	-0.33456	-0.30724	-0.259515	-0.194945	-0.0996776	0.0077042	0.143787	0.315503	0.544646	0.833985	1.16718	1.48014	1.71996	1.84587	1.87038	1.82263	1.72269	1.57266	1.3734	1.13145	0.901422	0.722845	0.638161	0.672153	0.784792	0.932319	1.07277	1.1868	1.29361	1.41914	1.58646	1.78827	1.99281	2.14513	2.21321	2.20567	2.16261	2.11129	2.06473	2.02951
0.370538	0.42408	0.477282	0.522827	0.562967	0.581698	0.571105	0.537002	0.466807	0.378467	0.268569	0.171045	0.0847969	0.0220373	-0.012511	-0.0118794	0.00647176	0.0173508	0.0218545	0.00589167	-0.0135298	-0.0261584	-0.0333939	-0.0266241	-0.0123658	0.0129202	0.0361058	0.0323961	-0.0365058	-0.173726	-0.394545	-0.658248	-0.925453	-1.15557	-1.29866	-1.37412	-1.38174	-1.35631	-1.30483	-1.24191	-1.15322	-1.06713	-1.00617	-1.00681	-1.05983	-1.10826	-1.13906	-1.13754	-1.11751	-1.09183
0.410215	0.465286	0.519712	0.570158	0.609427	0.623009	0.621345	0.607514	0.585594	0.573258	0.566014	0.568591	0.582628	0.582622	0.563225	0.531595	0.507635	0.497264	0.499908	0.515388	0.513086	0.473621	0.402305	0.323216	0.259361	0.23257	0.233268	0.249302	0.27337	0.294451	0.298328	0.287431	0.228882	0.123827	0.00705692	-0.112224	-0.183774	-0.175176	-0.0768734	0.125194	0.40147	0.678301	0.898818	1.02369	1.045	1.01099	0.925013	0.822205	0.731286	0.656645
0.272048	0.25055	0.214275	0.154283	0.0591036	-0.0684249	-0.201336	-0.33042	-0.468613	-0.657513	-0.924683	-1.27355	-1.68552	-2.09661	-2.45853	-2.76206	-3.00694	-3.18185	-3.24776	-3.1739	-2.9613	-2.65056	-2.28732	-1.94037	-1.65787	-1.45733	-1.34519	-1.30458	-1.30202	-1.30796	-1.30862	-1.2382	-1.07348	-0.822256	-0.5022	-0.182389	0.0478879	0.182087	0.250675	0.294369	0.326974	0.342379	0.32922	0.282614	0.202958	0.120312	0.0527683	0.0031346	-0.0241829	-0.0363375
2.38525	2.3022	2.22145	2.16308	2.13778	2.1604	2.20425	2.26032	2.30569	2.33778	2.36471	2.39244	2.41913	2.43981	2.43691	2.42511	2.40939	2.38129	2.32745	2.23649	2.09838	1.90623	1.66158	1.37882	1.07974	0.803756	0.589742	0.447752	0.374864	0.382832	0.439527	0.554875	0.691658	0.81381	0.873525	0.845077	0.738148	0.570358	0.390101	0.235879	0.162141	0.17579	0.2872	0.476194	0.686011	0.866968	0.999394	1.07385	1.10895	1.13559
2.02426	2.04827	2.05726	2.05397	2.03053	1.98759	1.9436	1.91768	1.90438	1.92543	1.96763	2.01869	2.04634	2.04966	2.02337	1.98791	1.94612	1.909	1.86183	1.81486	1.75039	1.66803	1.58108	1.47156	1.33471	1.16033	0.936121	0.702321	0.529501	0.412668	0.358351	0.320975	0.252751	0.146999	0.0200291	-0.107955	-0.205889	-0.25592	-0.241786	-0.146888	0.00286653	0.183158	0.348803	0.474758	0.567806	0.634247	0.686881	0.718447	0.7257	0.714961
0.944469	0.820325	0.645315	0.42232	0.190844	0.00818293	-0.0763295	-0.0551788	0.0609734	0.242752	0.448633	0.625443	0.777222	0.895818	0.989167	1.05228	1.07258	1.07437	1.05474	1.03615	1.02135	0.992801	0.925262	0.817598	0.659184	0.451713	0.227755	0.0211851	-0.117239	-0.172581	-0.156169	-0.104879	-0.066311	-0.0495837	-0.0537402	-0.0797832	-0.121374	-0.193742	-0.298251	-0.398334	-0.458629	-0.445067	-0.353678	-0.215872	-0.0816719	0.0265208	0.0929804	0.150901	0.256886	0.452037
0.0653528	0.0571321	0.051064	0.0465052	0.04811	0.057021	0.0677562	0.0541886	-0.00822846	-0.106828	-0.226665	-0.310454	-0.344819	-0.345072	-0.341085	-0.386647	-0.465388	-0.577611	-0.69552	-0.804032	-0.898676	-0.974269	-1.06428	-1.16812	-1.28551	-1.42661	-1.54532	-1.60765	-1.60498	-1.54614	-1.4645	-1.42881	-1.4873	-1.62487	-1.77922	-1.89701	-2.00054	-2.1183	-2.24886	-2.36325	-2.42597	-2.40354	-2.30162	-2.13558	-1.93142	-1.71649	-1.49426	-1.27928	-1.08632	-0.918176
-1.00096	-0.971988	-0.955278	-0.935106	-0.915876	-0.876518	-0.828446	-0.793835	-0.780733	-0.798793	-0.851423	-0.931825	-0.999662	-1.02692	-1.00278	-0.932076	-0.859473	-0.83564	-0.903284	-1.07586	-1.29452	-1.48464	-1.56545	-1.48155	-1.28944	-1.05348	-0.845729	-0.687478	-0.566016	-0.473652	-0.363447	-0.215124	-3.04085e-05	0.245447	0.511114	0.76728	0.976299	1.12705	1.2062	1.19887	1.10669	0.980616	0.89066	0.881317	0.907985	0.950912	0.975976	0.979731	0.972196	0.953673
0.224144	0.409408	0.648915	0.943184	1.23	1.46232	1.60697	1.66629	1.6978	1.72925	1.77399	1.82684	1.87085	1.88517	1.84415	1.71915	1.48385	1.1606	0.765471	0.37632	0.0580239	-0.138567	-0.177473	-0.102541	0.0305766	0.159791	0.218916	0.181593	0.0647421	-0.0860549	-0.221043	-0.302738	-0.264439	-0.0688945	0.24972	0.655328	1.0985	1.50995	1.83031	2.03834	2.15906	2.23765	2.27234	2.28254	2.28444	2.28793	2.28675	2.27637	2.28383	2.31098
0.478238	0.44982	0.398576	0.360788	0.34184	0.361494	0.421491	0.484822	0.532367	0.531059	0.483075	0.432728	0.4002	0.393595	0.416906	0.434686	0.416446	0.385851	0.346836	0.306636	0.289674	0.285385	0.321624	0.392191	0.464552	0.518957	0.527018	0.473893	0.367177	0.215862	0.0350528	-0.152556	-0.298654	-0.429015	-0.556676	-0.700198	-0.84046	-0.939554	-0.983722	-0.924475	-0.774524	-0.587983	-0.41395	-0.289189	-0.225287	-0.20895	-0.210353	-0.196469	-0.143477	-0.0867586
-2.24498	-2.2216	-2.15702	-2.05412	-1.91893	-1.73102	-1.43303	-1.02428	-0.592924	-0.211464	0.0184502	0.0793924	-0.0110753	-0.178513	-0.346283	-0.493828	-0.65211	-0.764177	-0.767082	-0.63633	-0.368604	-0.125548	-0.0218595	-0.140224	-0.465797	-0.899835	-1.31232	-1.57718	-1.62496	-1.45414	-1.1665	-0.803588	-0.377902	0.0423113	0.406304	0.71035	0.981725	1.17416	1.24322	1.22577	1.21491	1.16069	1.0611	0.953197	0.869931	0.857315	0.895476	1.00335	1.1243	1.2143
-0.748426	-0.628439	-0.443561	-0.18658	0.0991782	0.379111	0.629431	0.815699	0.943395	0.995013	0.984521	0.884342	0.65768	0.338107	-0.0533829	-0.423619	-0.708539	-0.876112	-0.967227	-1.03399	-1.1163	-1.24242	-1.40919	-1.61585	-1.83739	-2.02889	-2.16879	-2.23255	-2.16718	-1.96001	-1.61025	-1.14433	-0.646562	-0.177135	0.214462	0.494142	0.70747	0.868327	0.970554	1.02861	1.06346	1.09509	1.11551	1.12924	1.11226	1.09471	1.07641	1.06875	1.05351	1.02288
0.931835	0.890566	0.828	0.752189	0.68447	0.656587	0.67293	0.689512	0.670359	0.605072	0.550574	0.553322	0.628565	0.751029	0.846373	0.829988	0.6661	0.36104	-0.0580209	-0.471028	-0.786642	-0.958186	-0.968933	-0.896866	-0.816733	-0.769624	-0.770975	-0.790664	-0.764811	-0.682758	-0.49949	-0.208639	0.154182	0.538234	0.892366	1.1796	1.38303	1.44216	1.30979	0.977588	0.463115	-0.117769	-0.629656	-0.992183	-1.22134	-1.33315	-1.37112	-1.35349	-1.30605	-1.29262
0.244085	0.238891	0.266883	0.319341	0.408914	0.510681	0.589499	0.61855	0.548837	0.362854	0.0636338	-0.260838	-0.541692	-0.719923	-0.803532	-0.820719	-0.81245	-0.795209	-0.761991	-0.744143	-0.730203	-0.73749	-0.733751	-0.699851	-0.676976	-0.692528	-0.737831	-0.826015	-0.900454	-0.926061	-0.897464	-0.850764	-0.850738	-0.877829	-0.864879	-0.731475	-0.446436	0.00251616	0.523974	1.02316	1.41651	1.68474	1.81263	1.82201	1.77356	1.71537	1.68364	1.67845	1.68955	1.66865
-1.2358	-1.11497	-0.938042	-0.676438	-0.343136	0.0152716	0.337153	0.517213	0.516074	0.362551	0.139814	-0.0478008	-0.123789	-0.0606629	0.135577	0.396125	0.601152	0.67667	0.603743	0.457417	0.31943	0.221374	0.193595	0.212299	0.270284	0.338696	0.405147	0.451427	0.472775	0.486329	0.508805	0.562046	0.64902	0.766787	0.883379	0.95535	0.990965	0.977653	0.921458	0.846813	0.764134	0.704545	0.691711	0.730857	0.799634	0.873615	0.932906	0.988356	1.04219	1.08007
0.64529	0.560089	0.377609	0.0400097	-0.443337	-0.977826	-1.48702	-1.85125	-2.02248	-1.98687	-1.75255	-1.39331	-1.05142	-0.812403	-0.721376	-0.758764	-0.836422	-0.892906	-0.896168	-0.852967	-0.786057	-0.739923	-0.716956	-0.743133	-0.785692	-0.784913	-0.727568	-0.61783	-0.530529	-0.521507	-0.606546	-0.762438	-0.998106	-1.29506	-1.59027	-1.82865	-1.95796	-1.99535	-1.95136	-1.86659	-1.72176	-1.54002	-1.29353	-0.971956	-0.651986	-0.37689	-0.181907	-0.0678916	0.0197009	0.102358
0.34025	0.395126	0.46421	0.550263	0.626758	0.67253	0.682395	0.690771	0.708915	0.709375	0.627313	0.430853	0.138138	-0.185915	-0.454673	-0.607442	-0.636959	-0.582852	-0.454296	-0.265576	-0.00598997	0.234667	0.415584	0.500656	0.51479	0.523606	0.570098	0.665855	0.795934	0.929692	1.02079	1.03985	0.966863	0.814645	0.627569	0.445945	0.287449	0.195188	0.132987	0.106764	0.182987	0.388424	0.735284	1.16822	1.60816	1.99396	2.30157	2.56585	2.81585	3.07407
0.526071	0.586748	0.641559	0.671366	0.681517	0.663098	0.662639	0.663949	0.687508	0.779892	0.940356	1.16674	1.39661	1.55457	1.5879	1.46884	1.22006	0.879752	0.533345	0.24526	0.0455694	-0.0980207	-0.229879	-0.349739	-0.426034	-0.451224	-0.392909	-0.279332	-0.151834	-0.0255172	0.0919417	0.235878	0.421452	0.624918	0.815051	0.952834	1.04603	1.12161	1.24988	1.39466	1.51946	1.59745	1.61815	1.58998	1.55698	1.52773	1.51747	1.53352	1.56503	1.59607
0.114601	0.0501292	-0.0478492	-0.147392	-0.1915	-0.0943628	0.182091	0.610473	1.13783	1.65417	2.054	2.27745	2.2356	1.89316	1.3017	0.571949	-0.183293	-0.813354	-1.25152	-1.4409	-1.40808	-1.18125	-0.845316	-0.469142	-0.158526	0.071101	0.236724	0.3603	0.461134	0.566955	0.739044	0.949736	1.16771	1.34393	1.4651	1.50763	1.53776	1.5931	1.66952	1.74993	1.85678	1.99724	2.14722	2.26573	2.36114	2.4662	2.55732	2.63362	2.68148	2.66331
1.11004	1.10216	1.0954	1.08826	1.07357	1.06931	1.08288	1.12268	1.16107	1.12112	0.961973	0.702838	0.364605	0.0521294	-0.173507	-0.284878	-0.293966	-0.276404	-0.253683	-0.245631	-0.275059	-0.364368	-0.465142	-0.526989	-0.523124	-0.465745	-0.419241	-0.372315	-0.344188	-0.318429	-0.280267	-0.258297	-0.272153	-0.336501	-0.440885	-0.569728	-0.705483	-0.817527	-0.915944	-0.969861	-0.955795	-0.844422	-0.648948	-0.428012	-0.232001	-0.10492	-0.0304094	-0.018155	-0.0507443	-0.0901284
0.701207	0.630045	0.555743	0.490177	0.470835	0.475382	0.452333	0.324324	0.0408733	-0.366064	-0.789854	-1.15254	-1.40413	-1.58451	-1.78659	-2.05871	-2.39186	-2.76862	-3.12933	-3.42399	-3.63768	-3.73856	-3.72476	-3.54836	-3.24929	-2.88051	-2.49499	-2.20783	-2.0385	-1.91347	-1.76833	-1.50574	-1.12491	-0.703047	-0.30897	-0.0864111	-0.0805828	-0.220551	-0.396521	-0.505264	-0.508347	-0.439242	-0.3548	-0.296475	-0.29512	-0.290689	-0.264229	-0.215189	-0.170421	-0.152573
-1.58348	-1.58048	-1.5562	-1.51767	-1.47888	-1.46107	-1.45794	-1.48169	-1.49832	-1.5033	-1.48781	-1.48086	-1.50246	-1.53196	-1.54716	-1.5498	-1.52663	-1.49215	-1.46969	-1.46191	-1.47192	-1.48184	-1.50776	-1.52969	-1.54829	-1.5398	-1.49892	-1.43578	-1.30068	-1.1234	-0.923476	-0.77033	-0.730055	-0.823107	-0.989414	-1.12543	-1.17983	-1.15223	-1.09866	-1.05585	-1.02286	-0.99407	-0.985392	-1.0195	-1.04614	-1.06903	-1.06383	-1.04433	-1.02904	-1.03181
-1.78948	-1.76693	-1.70135	-1.59951	-1.47356	-1.35156	-1.25576	-1.21808	-1.19614	-1.15645	-1.12067	-1.09804	-1.06688	-0.996326	-0.893155	-0.779072	-0.64874	-0.503472	-0.376078	-0.260805	-0.199854	-0.251393	-0.427559	-0.706966	-1.02227	-1.31791	-1.50585	-1.58195	-1.54502	-1.48056	-1.4576	-1.53082	-1.68626	-1.85119	-1.98458	-2.06823	-2.15562	-2.21559	-2.21362	-2.07321	-1.84277	-1.56794	-1.31743	-1.13551	-1.0392	-1.0086	-0.999098	-0.976871	-0.906341	-0.792331
-0.348386	-0.459419	-0.547885	-0.629497	-0.687614	-0.727422	-0.746056	-0.772098	-0.821804	-0.902465	-1.01683	-1.16224	-1.34216	-1.52398	-1.68301	-1.79295	-1.86574	-1.91661	-1.94148	-1.98481	-2.02745	-2.08845	-2.14569	-2.2165	-2.27016	-2.28887	-2.2667	-2.19379	-2.07221	-1.94054	-1.8304	-1.77094	-1.75736	-1.74837	-1.72712	-1.6857	-1.61163	-1.53833	-1.46455	-1.40136	-1.35124	-1.32747	-1.3446	-1.3874	-1.45379	-1.5117	-1.57503	-1.61971	-1.62564	-1.56597
-1.06839	-1.07379	-1.04961	-0.999256	-0.932271	-0.860247	-0.803079	-0.751339	-0.697996	-0.641851	-0.587964	-0.540607	-0.486643	-0.425416	-0.344082	-0.262374	-0.181072	-0.125736	-0.0928082	-0.0758275	-0.0744534	-0.0986055	-0.172061	-0.290669	-0.416824	-0.516379	-0.573109	-0.58805	-0.602426	-0.634625	-0.695334	-0.756177	-0.781177	-0.747833	-0.667746	-0.583471	-0.542311	-0.566429	-0.642573	-0.736589	-0.808168	-0.830041	-0.811328	-0.771239	-0.729322	-0.704394	-0.716694	-0.768876	-0.864219	-0.981759
-1.25559	-1.31852	-1.39025	-1.44647	-1.4801	-1.47625	-1.43695	-1.36611	-1.26526	-1.17556	-1.11026	-1.07733	-1.05011	-1.00415	-0.946086	-0.895516	-0.890839	-0.928568	-1.00883	-1.11492	-1.24882	-1.37005	-1.46915	-1.54906	-1.61178	-1.66787	-1.70229	-1.71365	-1.67895	-1.59121	-1.4709	-1.35869	-1.29189	-1.27358	-1.28131	-1.27654	-1.24991	-1.20914	-1.17824	-1.135	-1.07517	-1.01427	-0.974946	-0.98828	-1.05213	-1.14322	-1.22539	-1.26442	-1.26731	-1.21713
0.564371	0.621795	0.709328	0.824981	0.965543	1.11758	1.25633	1.36607	1.46562	1.56357	1.65206	1.72435	1.7949	1.88111	1.99889	2.13084	2.24612	2.31701	2.34414	2.35577	2.37241	2.40394	2.44982	2.50065	2.53005	2.52998	2.49124	2.41321	2.31315	2.20775	2.10052	2.00131	1.89576	1.79222	1.69475	1.6212	1.57421	1.55032	1.54808	1.55208	1.56341	1.56895	1.5707	1.56016	1.54116	1.50265	1.45783	1.42853	1.41043	1.4043
-2.73665	-2.76063	-2.78652	-2.81763	-2.83846	-2.82675	-2.77285	-2.69817	-2.63896	-2.63362	-2.69169	-2.78601	-2.90209	-3.00871	-3.09927	-3.17554	-3.22748	-3.24557	-3.23247	-3.19342	-3.12434	-3.02261	-2.8866	-2.74245	-2.60796	-2.49811	-2.4192	-2.37008	-2.33276	-2.28443	-2.22303	-2.1402	-2.0421	-1.93187	-1.80573	-1.65901	-1.50718	-1.3752	-1.28284	-1.2534	-1.27294	-1.31851	-1.3543	-1.37369	-1.38579	-1.38072	-1.37137	-1.36131	-1.35681	-1.35901
-1.74128	-1.74686	-1.74963	-1.74504	-1.73269	-1.71239	-1.69138	-1.67114	-1.64877	-1.6251	-1.58449	-1.52156	-1.42549	-1.31439	-1.21457	-1.14971	-1.12347	-1.12025	-1.11969	-1.11016	-1.06506	-0.969028	-0.834014	-0.671494	-0.486326	-0.302802	-0.117657	0.0875743	0.283392	0.471192	0.634387	0.769381	0.873742	0.941794	0.957221	0.940297	0.911905	0.9095	0.950182	1.01442	1.07563	1.10983	1.10236	1.04776	0.962573	0.873185	0.794159	0.731124	0.693357	0.684952
-1.38947	-1.35216	-1.26596	-1.13187	-0.965658	-0.808054	-0.70344	-0.668598	-0.688824	-0.739717	-0.790392	-0.82662	-0.832102	-0.787399	-0.675002	-0.508957	-0.326616	-0.182835	-0.120512	-0.15893	-0.267368	-0.394393	-0.498749	-0.562572	-0.583036	-0.57114	-0.528065	-0.446741	-0.302183	-0.0757268	0.223816	0.569837	0.920293	1.21786	1.41773	1.51018	1.51336	1.46834	1.40171	1.33954	1.28959	1.23899	1.19275	1.13972	1.06591	0.967036	0.853103	0.74314	0.641043	0.555603
-0.0741622	-0.144563	-0.186829	-0.196493	-0.210139	-0.249848	-0.214665	-0.0744958	0.112229	0.283907	0.342587	0.208585	-0.0212026	-0.143949	-0.0399599	0.302144	0.708901	1.01911	1.12433	1.02681	0.817391	0.584313	0.378968	0.245796	0.196202	0.198416	0.163595	0.0268628	-0.161556	-0.325693	-0.358145	-0.281704	-0.145054	0.121614	0.430952	0.660606	0.722519	0.577597	0.323765	0.0502277	-0.0949692	-0.035661	0.158751	0.351788	0.449767	0.334293	0.0955104	-0.121308	-0.319811	-0.413032
0.0887306	0.101898	0.0563773	-0.0137378	-0.075239	-0.0838385	-0.0555975	-0.0217987	-0.0148541	-0.0986516	-0.220392	-0.330091	-0.409405	-0.468015	-0.487576	-0.457081	-0.403323	-0.391533	-0.367933	-0.396909	-0.472432	-0.545702	-0.5742	-0.553106	-0.407896	-0.259799	-0.157034	-0.206615	-0.320749	-0.466989	-0.549651	-0.60781	-0.583136	-0.497899	-0.356377	-0.185137	-0.0722378	-0.0285021	-0.0981251	-0.187453	-0.316913	-0.424756	-0.477406	-0.447483	-0.363892	-0.284931	-0.22349	-0.16812	-0.0409168	0.07523
0.0844999	0.0587149	0.0341683	0.121651	0.308276	0.535302	0.690698	0.701101	0.530522	0.29081	0.0794395	-0.0513468	-0.140242	-0.184546	-0.2225	-0.186568	-0.0249599	0.186729	0.35839	0.418051	0.353306	0.152639	-0.0873789	-0.28927	-0.390483	-0.353259	-0.228338	-0.111082	-0.0359958	-0.00294176	-0.0377782	-0.0603315	-0.0850145	-0.194712	-0.335867	-0.438591	-0.435316	-0.303368	-0.0832253	0.147668	0.32622	0.296084	0.155843	-0.0906736	-0.311425	-0.361039	-0.189867	0.103156	0.29367	0.284558
-0.498178	-0.626343	-0.744342	-0.845925	-0.895461	-0.871665	-0.791775	-0.655884	-0.502677	-0.370575	-0.272425	-0.182589	-0.0598253	0.0796921	0.218089	0.292694	0.272295	0.184824	0.0666211	-0.0221958	-0.0631253	-0.0825264	-0.0624455	-0.0292261	0.00371032	-0.00482157	-0.0364374	-0.101846	-0.13884	-0.169853	-0.193071	-0.185216	-0.157318	-0.15109	-0.164538	-0.150984	-0.0966118	0.0496857	0.188008	0.337702	0.448176	0.516906	0.545872	0.551528	0.497776	0.335611	0.126722	-0.0576351	-0.170794	-0.20552
-0.152958	-0.222176	-0.314172	-0.353004	-0.387251	-0.432745	-0.41921	-0.329322	-0.207345	-0.0634101	0.0508453	0.0842257	-0.00437988	-0.123029	-0.237175	-0.325278	-0.410685	-0.461039	-0.457895	-0.455768	-0.424037	-0.401763	-0.378484	-0.345502	-0.278813	-0.209281	-0.202588	-0.286988	-0.441099	-0.565386	-0.548425	-0.404922	-0.208829	-0.00605886	0.18164	0.297698	0.314551	0.244799	0.215319	0.217831	0.261664	0.221095	0.0809297	-0.14607	-0.347544	-0.46743	-0.450317	-0.326328	-0.171025	-0.0624563
-1.17731	-1.17015	-1.06136	-0.945261	-0.723714	-0.494103	-0.275053	-0.101555	-0.00784747	0.059187	0.0692392	0.0840857	0.210115	0.428292	0.642213	0.758747	0.72812	0.479206	0.11371	-0.188568	-0.328808	-0.258384	-0.0808695	0.153073	0.454455	0.737249	0.777775	0.568285	0.171225	-0.245165	-0.527972	-0.660308	-0.700639	-0.741582	-0.825628	-0.800853	-0.58078	-0.308388	-0.0865565	0.0214725	-0.0745453	-0.300759	-0.461996	-0.51327	-0.372662	-0.185232	0.0379685	0.283035	0.506009	0.64452
0.477879	0.307151	0.177801	0.100666	0.0787015	0.0900492	0.0633709	-0.000357004	-0.0839473	-0.128536	-0.101878	0.0182117	0.112786	0.125298	0.061189	-0.0488589	-0.143006	-0.167662	-0.152599	-0.150048	-0.198328	-0.18451	-0.0831837	0.0512509	0.199826	0.290085	0.331524	0.317143	0.310755	0.34807	0.367158	0.354595	0.275856	0.242676	0.233629	0.248526	0.253764	0.311589	0.364943	0.365145	0.260562	0.062784	-0.19858	-0.488651	-0.745376	-0.931116	-0.993453	-0.908363	-0.698574	-0.417639
-0.568091	-0.350512	-0.0637555	0.242611	0.432019	0.504085	0.497246	0.50709	0.537596	0.598429	0.636051	0.576583	0.443917	0.325657	0.2538	0.204326	0.161415	0.102867	0.0281656	-0.00938861	0.018715	0.122928	0.216079	0.265572	0.242517	0.15383	0.0270465	-0.0884507	-0.21639	-0.349838	-0.426836	-0.394757	-0.274252	-0.145885	-0.028935	0.0269065	0.0164574	0.0691736	0.182608	0.301476	0.344985	0.284469	0.179718	0.0854595	0.100028	0.170355	0.268254	0.277288	0.223622	0.0832276
0.0669993	-0.182548	-0.283356	-0.245634	-0.0256427	0.249434	0.379857	0.328131	0.143275	-0.00183484	-0.0510602	-0.0299644	-0.0342779	0.0226948	0.0991767	0.211091	0.313992	0.369638	0.35453	0.298674	0.259071	0.239262	0.193032	0.144379	0.126238	0.193433	0.254811	0.238931	0.20001	0.167154	0.209501	0.424365	0.730354	1.00473	1.13053	1.15237	1.08394	1.06054	1.10493	1.14	1.09656	0.913331	0.68603	0.50479	0.408897	0.399158	0.468679	0.588474	0.671884	0.726347
-0.0452587	-0.0616267	-0.0698606	-0.0319397	0.0195336	0.0748764	0.122044	0.193713	0.258598	0.269197	0.238066	0.15075	0.0533126	-0.0165045	-0.0617539	-0.0274591	0.086773	0.235363	0.356237	0.442989	0.426063	0.280786	0.049132	-0.206376	-0.412925	-0.543799	-0.569859	-0.449075	-0.269476	-0.068371	0.12095	0.26064	0.307293	0.312252	0.307129	0.264596	0.187005	0.125612	0.148549	0.222175	0.387073	0.561624	0.710069	0.743197	0.703116	0.626945	0.548265	0.485273	0.460247	0.450812
0.030645	-0.128437	-0.324142	-0.454387	-0.43901	-0.245502	-0.00381192	0.158464	0.115027	-0.0688789	-0.276936	-0.411659	-0.418205	-0.36928	-0.310688	-0.305226	-0.335633	-0.423016	-0.489533	-0.505756	-0.462463	-0.370575	-0.257001	-0.138384	-0.000292426	0.0889306	0.0960766	0.00427358	-0.144556	-0.279504	-0.392784	-0.46379	-0.504183	-0.486127	-0.412907	-0.232589	0.0429197	0.377321	0.667577	0.913617	1.00878	0.974624	0.863743	0.735651	0.624847	0.461059	0.257322	0.0150329	-0.251623	-0.497464
0.53322	0.505079	0.436373	0.395102	0.351652	0.316638	0.23701	0.112473	-0.0515389	-0.188754	-0.174593	0.0347022	0.302316	0.530897	0.653836	0.674919	0.61192	0.543991	0.484167	0.434689	0.409607	0.401071	0.40887	0.351063	0.211263	0.0421435	-0.143096	-0.253343	-0.226299	-0.0834419	0.0966222	0.217161	0.325192	0.394259	0.429819	0.433262	0.397788	0.274069	0.129975	0.029549	0.0168592	0.0606962	0.0828378	0.073902	0.100549	0.109271	0.144679	0.195057	0.227119	0.226562
-0.159171	-0.335041	-0.383285	-0.325787	-0.108903	0.134838	0.266345	0.199945	-0.00524159	-0.220329	-0.391979	-0.471727	-0.383568	-0.141827	0.123738	0.263807	0.251684	0.168878	0.0946363	-0.00308014	-0.154834	-0.37334	-0.536698	-0.571567	-0.492587	-0.286279	-0.04745	0.0269949	-0.0868587	-0.376257	-0.625958	-0.752677	-0.756364	-0.613599	-0.434078	-0.297402	-0.210252	-0.182616	-0.258023	-0.38381	-0.521644	-0.590993	-0.573202	-0.382286	-0.00709273	0.438649	0.772665	1.0336	1.17991	1.26099
-0.69148	-0.386156	-0.143683	0.0175029	0.0037293	-0.0806505	-0.209841	-0.269017	-0.311488	-0.274712	-0.162477	-0.0187106	0.184048	0.369785	0.526671	0.574863	0.56209	0.481725	0.415067	0.354121	0.275235	0.25214	0.214309	0.146855	-0.0285192	-0.236921	-0.363579	-0.314301	-0.176208	-0.0369107	0.00978503	-0.00849838	-0.0301653	0.00135894	0.0453192	0.0587449	-0.00659107	-0.159445	-0.344365	-0.497554	-0.557993	-0.568492	-0.517407	-0.428928	-0.355635	-0.330105	-0.420202	-0.615125	-0.761564	-0.836224
-0.157882	-0.158153	-0.157534	-0.100788	-0.00372168	0.0773477	0.0656506	-0.0253475	-0.195284	-0.319446	-0.373907	-0.334343	-0.222756	-0.156351	-0.177356	-0.230441	-0.267468	-0.26953	-0.17666	-0.0627169	0.0462697	0.0853991	0.0890022	0.0465495	0.0106285	-0.0853419	-0.203858	-0.300032	-0.347864	-0.321338	-0.258763	-0.167232	-0.0819923	-0.0601004	-0.0893673	-0.136108	-0.168731	-0.177924	-0.185931	-0.167274	-0.0886921	0.0313638	0.129005	0.137244	0.0306429	-0.105447	-0.195668	-0.175988	-0.054844	0.141939
-0.496033	-0.441769	-0.250834	0.0451627	0.307873	0.490367	0.464379	0.400219	0.327166	0.318352	0.322622	0.337795	0.247355	0.0647568	-0.0843265	-0.208474	-0.308295	-0.385757	-0.371055	-0.353378	-0.318554	-0.264877	-0.16889	-0.0931215	-0.0703781	-0.103209	-0.116665	-0.111192	-0.103192	-0.0861924	-0.0500243	-0.0251713	-0.0530727	-0.151872	-0.262497	-0.395804	-0.498652	-0.60324	-0.667347	-0.67453	-0.5742	-0.35707	-0.0590377	0.159438	0.229355	0.129144	-0.03052	-0.154499	-0.24005	-0.246514
-0.793092	-0.622245	-0.49351	-0.398515	-0.293641	-0.205266	-0.106822	-0.047613	-0.0926269	-0.206524	-0.259223	-0.243848	-0.148251	-0.0439051	0.0693813	0.188064	0.259395	0.321072	0.366053	0.432186	0.493826	0.55875	0.70882	0.872025	0.997354	1.10398	1.16705	1.15102	1.02753	0.806631	0.593015	0.394363	0.264051	0.254038	0.305748	0.360905	0.372922	0.323711	0.235485	0.0907554	-0.0621703	-0.223713	-0.335133	-0.419108	-0.446269	-0.387803	-0.237484	-0.0786382	0.00326459	-0.00716689
0.241395	-0.0748324	-0.301435	-0.388604	-0.304491	-0.0621045	0.163854	0.298567	0.24117	0.0838548	-0.122054	-0.347267	-0.466151	-0.434062	-0.316557	-0.22492	-0.180789	-0.189504	-0.246195	-0.393879	-0.540849	-0.630056	-0.683056	-0.672122	-0.705851	-0.766035	-0.900976	-0.965231	-0.934299	-0.831458	-0.68602	-0.568479	-0.508029	-0.467502	-0.449761	-0.495082	-0.572217	-0.646144	-0.63963	-0.557611	-0.396454	-0.226671	-0.130166	-0.111525	-0.120206	-0.0754189	0.0340307	0.161061	0.23518	0.143272
0.824709	0.815756	0.809753	0.733888	0.608655	0.39957	0.178778	0.102335	0.175606	0.35835	0.561628	0.761711	0.868159	0.855691	0.726274	0.589453	0.421689	0.329171	0.299349	0.350431	0.415423	0.463014	0.498493	0.466156	0.384747	0.264229	0.174384	0.147873	0.16927	0.258071	0.434267	0.589412	0.674755	0.620414	0.439854	0.320817	0.320652	0.475355	0.672217	0.823111	0.911783	0.862169	0.734702	0.573925	0.425951	0.273436	0.0854051	-0.109619	-0.214017	-0.230553
0.820259	0.68648	0.572334	0.404903	0.238036	0.0771879	-0.0161921	-0.0921111	-0.207658	-0.258729	-0.325874	-0.373018	-0.464109	-0.509308	-0.566893	-0.640614	-0.730977	-0.801986	-0.86084	-0.853754	-0.754048	-0.662634	-0.640345	-0.703357	-0.710951	-0.677777	-0.583234	-0.50836	-0.447319	-0.39892	-0.388983	-0.337169	-0.326846	-0.35887	-0.434043	-0.51435	-0.565009	-0.555413	-0.488413	-0.46188	-0.471882	-0.507835	-0.458999	-0.34011	-0.27051	-0.227644	-0.253575	-0.313756	-0.347834	-0.325923
1.50504	1.70318	1.95323	2.19365	2.40842	2.58538	2.68284	2.69934	2.67521	2.62012	2.574	2.53865	2.51057	2.48473	2.45381	2.42158	2.38494	2.32634	2.18059	1.92109	1.54898	1.12447	0.710759	0.38024	0.170495	0.0779856	0.0424443	0.0156483	-0.0341242	-0.0868852	-0.0755627	0.0243646	0.240869	0.535494	0.823847	1.02626	1.12479	1.11327	1.04896	0.959602	0.909433	0.918948	0.96743	1.04049	1.14716	1.29195	1.4298	1.5325	1.61047	1.68517
0.29612	0.22605	0.131161	0.0259149	-0.0751755	-0.163988	-0.235134	-0.301843	-0.379731	-0.481123	-0.606168	-0.740903	-0.859964	-0.933562	-0.943157	-0.906641	-0.830195	-0.729272	-0.600084	-0.431586	-0.188451	0.0933497	0.383476	0.655946	0.868021	1.00963	1.08876	1.12451	1.11268	1.08084	1.03855	0.992676	0.958648	0.944134	0.942547	0.934157	0.907182	0.84402	0.75526	0.667136	0.618977	0.624165	0.676042	0.753021	0.843007	0.934027	1.01712	1.09617	1.16404	1.19856
-0.0416342	0.0141154	0.137368	0.35557	0.667014	1.04199	1.44489	1.83383	2.19086	2.50004	2.72439	2.84246	2.8435	2.76586	2.65596	2.58362	2.58456	2.67162	2.82756	3.06207	3.34925	3.62459	3.84397	3.95896	3.94742	3.81924	3.64071	3.48107	3.38389	3.34309	3.35072	3.38461	3.3991	3.41286	3.42249	3.42954	3.41857	3.36948	3.29069	3.208	3.14865	3.13476	3.19292	3.27217	3.34593	3.38437	3.38566	3.3874	3.38098	3.3796
-0.779224	-0.811874	-0.85287	-0.889722	-0.910068	-0.895535	-0.846702	-0.762264	-0.66428	-0.571818	-0.492672	-0.444606	-0.429458	-0.438031	-0.471899	-0.520244	-0.583034	-0.657358	-0.73211	-0.805935	-0.870621	-0.926378	-0.971254	-0.989057	-0.969643	-0.923022	-0.86192	-0.783748	-0.694779	-0.599637	-0.501163	-0.424813	-0.406302	-0.470193	-0.602628	-0.763799	-0.913556	-1.02462	-1.10203	-1.15696	-1.21149	-1.26635	-1.31894	-1.36372	-1.37673	-1.3515	-1.2967	-1.22882	-1.16102	-1.10089
1.21604	1.12246	0.998769	0.837466	0.664634	0.532158	0.451167	0.444712	0.483658	0.549328	0.62695	0.685958	0.706712	0.706165	0.690132	0.66565	0.646277	0.618474	0.565635	0.496785	0.430873	0.383678	0.36138	0.343011	0.315691	0.276874	0.231088	0.189109	0.169451	0.190952	0.254154	0.347858	0.457551	0.567636	0.667543	0.746123	0.788583	0.794338	0.730178	0.592708	0.408402	0.232145	0.116119	0.100809	0.188036	0.352409	0.544501	0.719647	0.85115	0.933739
0.870602	0.892227	0.898781	0.87685	0.83113	0.757054	0.6622	0.529836	0.327642	0.0340405	-0.338953	-0.759119	-1.16549	-1.50634	-1.74233	-1.8517	-1.84805	-1.76432	-1.66223	-1.60725	-1.63406	-1.73651	-1.88297	-2.04073	-2.16613	-2.26009	-2.28428	-2.2323	-2.11734	-1.95001	-1.74565	-1.52925	-1.355	-1.2373	-1.21068	-1.31167	-1.54018	-1.81851	-2.05926	-2.21959	-2.31848	-2.3661	-2.33959	-2.23777	-2.06093	-1.85326	-1.66405	-1.52922	-1.45449	-1.42641
-0.473073	-0.606488	-0.778682	-0.973057	-1.15076	-1.2804	-1.35132	-1.38193	-1.39801	-1.40583	-1.40031	-1.38245	-1.35871	-1.32813	-1.28713	-1.23394	-1.18905	-1.14479	-1.12896	-1.16236	-1.23537	-1.32642	-1.40489	-1.44676	-1.44038	-1.39225	-1.29589	-1.16888	-1.0163	-0.879327	-0.794501	-0.798296	-0.900559	-1.06723	-1.24215	-1.37065	-1.44003	-1.45864	-1.45105	-1.436	-1.40858	-1.36365	-1.29489	-1.22546	-1.1656	-1.12899	-1.11667	-1.11873	-1.14328	-1.17335
-1.64818	-1.57464	-1.47604	-1.38817	-1.34301	-1.37109	-1.46351	-1.5697	-1.63044	-1.61999	-1.54588	-1.42923	-1.32157	-1.24724	-1.24248	-1.28482	-1.35388	-1.42359	-1.46415	-1.46608	-1.4299	-1.36793	-1.3098	-1.24994	-1.18632	-1.14017	-1.11465	-1.11373	-1.13766	-1.17966	-1.24651	-1.3235	-1.40498	-1.483	-1.52476	-1.53738	-1.52932	-1.49428	-1.45293	-1.41059	-1.36541	-1.32687	-1.31617	-1.33255	-1.38025	-1.42872	-1.47868	-1.50671	-1.51461	-1.50565
0.947014	0.933648	0.925966	0.924783	0.924783	0.927459	0.933206	0.943078	0.955834	0.973295	0.992055	0.989487	0.919224	0.749932	0.477118	0.143682	-0.177503	-0.427318	-0.593203	-0.711178	-0.813658	-0.921839	-1.02414	-1.08764	-1.0904	-1.03994	-0.961798	-0.900188	-0.862672	-0.854553	-0.840606	-0.801188	-0.741397	-0.689455	-0.656028	-0.645387	-0.645556	-0.643093	-0.596584	-0.470163	-0.263345	-0.00493969	0.260464	0.488873	0.666833	0.800837	0.902782	0.992368	1.06651	1.13285
-1.45972	-1.32148	-1.14906	-0.979387	-0.846229	-0.776398	-0.743764	-0.687282	-0.584182	-0.449608	-0.336482	-0.285949	-0.302541	-0.327796	-0.314955	-0.229049	-0.0901546	0.0644931	0.200769	0.295831	0.34332	0.350692	0.332965	0.31525	0.315701	0.345062	0.398431	0.470088	0.573456	0.72143	0.924336	1.16579	1.40562	1.60105	1.71669	1.73843	1.6876	1.60887	1.54232	1.50946	1.51376	1.55325	1.61474	1.69673	1.78776	1.86944	1.92583	1.93003	1.86261	1.72209
1.26502	1.28036	1.31078	1.35122	1.38788	1.42063	1.43706	1.4511	1.43558	1.37414	1.25229	1.08866	0.875559	0.668898	0.498701	0.338217	0.178728	0.0343229	-0.0273657	0.0657713	0.33178	0.725919	1.16739	1.54058	1.77538	1.82698	1.68287	1.39448	1.05415	0.751144	0.552968	0.51547	0.605388	0.742819	0.870378	0.944073	0.90603	0.791386	0.660825	0.565771	0.51531	0.489825	0.46618	0.435733	0.388371	0.355086	0.376234	0.440456	0.523117	0.592232
1.00242	0.981754	0.941465	0.881887	0.807858	0.723453	0.631525	0.539641	0.450249	0.356767	0.269978	0.172181	0.0623509	-0.0864415	-0.27952	-0.506022	-0.730263	-0.915585	-1.03871	-1.09335	-1.0902	-1.04336	-0.965984	-0.8758	-0.80127	-0.780532	-0.809962	-0.871967	-0.92961	-0.956718	-0.951166	-0.930095	-0.915826	-0.907441	-0.906103	-0.898529	-0.887538	-0.874033	-0.85997	-0.845426	-0.829679	-0.814902	-0.801359	-0.778804	-0.749315	-0.703601	-0.626626	-0.524423	-0.412374	-0.316178
0.743095	0.709213	0.666074	0.614792	0.570964	0.533948	0.503583	0.474529	0.456727	0.454284	0.470416	0.501559	0.542547	0.580156	0.60171	0.60517	0.597583	0.587684	0.574713	0.560922	0.541826	0.53329	0.543293	0.596718	0.700314	0.840592	0.990943	1.12453	1.21764	1.27305	1.29941	1.30321	1.30649	1.31422	1.33051	1.35826	1.39176	1.42282	1.43433	1.4223	1.38673	1.34132	1.29543	1.2608	1.23911	1.22951	1.23282	1.24637	1.25675	1.26236
0.677904	0.640768	0.604161	0.560735	0.54324	0.557932	0.59794	0.629675	0.626387	0.581443	0.503015	0.41756	0.347323	0.313499	0.317746	0.359461	0.408272	0.423819	0.399099	0.318556	0.202197	0.0662376	-0.0519888	-0.128631	-0.149126	-0.0891535	0.0586302	0.284478	0.529694	0.754741	0.907936	0.951168	0.899011	0.802673	0.710592	0.669422	0.681382	0.744792	0.82973	0.913089	0.978812	1.02305	1.071	1.11991	1.16611	1.19891	1.22592	1.24054	1.26087	1.28653
-1.09268	-0.978462	-0.834203	-0.660139	-0.494757	-0.366211	-0.29597	-0.292261	-0.355533	-0.472877	-0.632825	-0.812692	-0.988675	-1.13756	-1.24056	-1.28904	-1.30533	-1.30481	-1.30158	-1.27266	-1.21209	-1.11112	-0.955237	-0.7926	-0.640333	-0.524273	-0.446479	-0.377273	-0.276926	-0.114556	0.0862902	0.284947	0.422282	0.463243	0.42939	0.375257	0.352131	0.375388	0.448579	0.56715	0.717968	0.86309	0.970735	1.02642	1.04063	1.03456	1.02956	1.04068	1.05806	1.07351
-1.19435	-1.04008	-0.855092	-0.650325	-0.432087	-0.235442	-0.0930138	-0.0315432	-0.0573264	-0.151781	-0.267679	-0.36365	-0.417581	-0.447863	-0.422533	-0.343224	-0.209921	-0.0406053	0.155649	0.347327	0.503215	0.605848	0.653165	0.655491	0.61991	0.556062	0.470649	0.361744	0.212923	0.0309953	-0.14402	-0.304344	-0.430986	-0.52	-0.574007	-0.590335	-0.593042	-0.592872	-0.595201	-0.580425	-0.539095	-0.46128	-0.359732	-0.253768	-0.168394	-0.110387	-0.0720945	-0.0422482	-0.00883163	0.0428396
-0.590346	-0.662827	-0.758874	-0.855382	-0.895796	-0.911993	-0.865468	-0.802248	-0.690825	-0.53359	-0.301001	-0.0371785	0.180372	0.171476	-0.0872066	-0.486011	-0.843028	-1.0266	-1.02178	-0.863932	-0.588737	-0.220139	0.211912	0.623743	0.880853	0.924137	0.743734	0.415709	0.0344176	-0.221981	-0.300364	-0.172771	0.147195	0.614851	1.18262	1.77446	2.31486	2.73953	2.97038	2.95414	2.69875	2.25875	1.71607	1.18711	0.818783	0.688329	0.809913	1.10712	1.42034	1.63044
-0.892758	-0.952248	-1.02085	-1.06953	-1.04085	-0.913383	-0.677671	-0.385196	-0.0994447	0.126207	0.263195	0.344636	0.400347	0.456347	0.502889	0.530524	0.523619	0.482875	0.432375	0.382266	0.35707	0.348121	0.330168	0.312118	0.279246	0.243855	0.204983	0.173637	0.151484	0.137029	0.144917	0.184937	0.2639	0.374358	0.496944	0.60954	0.687201	0.724596	0.743763	0.77091	0.80409	0.838966	0.84863	0.830133	0.787608	0.733176	0.676949	0.620207	0.57541	0.527322
-0.303925	-0.243307	-0.196411	-0.163646	-0.136691	-0.105705	-0.066514	-0.0183533	0.00104035	-0.0343627	-0.11958	-0.219534	-0.352794	-0.47518	-0.539264	-0.539278	-0.468163	-0.305774	-0.0488754	0.291277	0.646571	0.976505	1.24247	1.41759	1.51382	1.55926	1.57111	1.5785	1.59195	1.60543	1.601	1.57366	1.52381	1.47727	1.46003	1.4863	1.54793	1.63162	1.7204	1.80282	1.87396	1.93122	1.96882	1.99309	2.00358	2.00382	2.00744	2.02882	2.06147	2.09446
-0.89109	-0.976394	-1.07433	-1.17915	-1.30588	-1.45854	-1.60404	-1.69515	-1.72084	-1.68669	-1.63285	-1.58501	-1.57094	-1.58755	-1.59867	-1.58152	-1.55004	-1.51864	-1.49994	-1.5007	-1.50237	-1.49827	-1.49526	-1.48635	-1.47553	-1.45074	-1.41744	-1.40546	-1.43178	-1.51406	-1.65237	-1.84288	-2.05	-2.25455	-2.39389	-2.39897	-2.19345	-1.73883	-1.11234	-0.461415	0.0765757	0.423568	0.594208	0.646492	0.634988	0.606214	0.58142	0.561148	0.542988	0.529222
-1.38783	-1.3986	-1.40665	-1.41338	-1.42761	-1.44301	-1.45427	-1.45962	-1.45075	-1.4195	-1.36098	-1.27395	-1.17037	-1.09165	-1.08511	-1.1619	-1.28323	-1.38378	-1.41797	-1.36446	-1.25405	-1.13945	-1.05315	-1.00922	-1.00833	-1.02115	-1.01837	-0.978101	-0.872826	-0.7207	-0.501355	-0.245456	0.012758	0.220851	0.331961	0.364047	0.361669	0.353226	0.349906	0.354427	0.369197	0.388945	0.401784	0.407812	0.434633	0.478232	0.498217	0.497545	0.463105	0.403554
1.51917	1.45741	1.36478	1.26367	1.18702	1.16757	1.2113	1.30112	1.40597	1.50482	1.60618	1.72486	1.86539	2.0156	2.13249	2.18984	2.19106	2.15877	2.10812	2.04124	1.96064	1.8712	1.77452	1.70394	1.67239	1.68912	1.75512	1.85303	1.97518	2.11977	2.27731	2.44395	2.6084	2.76663	2.9138	3.03328	3.12216	3.19209	3.25467	3.32699	3.42208	3.5355	3.64512	3.71065	3.73257	3.71638	3.68352	3.66036	3.65913	3.68691
-1.56133	-1.65446	-1.80146	-2.00583	-2.24732	-2.48171	-2.66052	-2.724	-2.63797	-2.41344	-2.06352	-1.67285	-1.29699	-1.00889	-0.843792	-0.796207	-0.836898	-0.939083	-1.09291	-1.27926	-1.47426	-1.62545	-1.6931	-1.6499	-1.50318	-1.29452	-1.07648	-0.870011	-0.69053	-0.535641	-0.384881	-0.239233	-0.110419	-0.00071043	0.110264	0.220918	0.335873	0.447911	0.551531	0.633626	0.669877	0.660083	0.599927	0.47706	0.302597	0.0952566	-0.128024	-0.351495	-0.554115	-0.736414
0.862344	0.744699	0.593036	0.506369	0.448014	0.430713	0.491319	0.601667	0.701507	0.722127	0.658928	0.563398	0.449142	0.336748	0.288637	0.300051	0.325042	0.321253	0.287369	0.200007	0.112738	0.0615616	0.0677607	0.0977807	0.161206	0.246625	0.324955	0.388104	0.426127	0.414205	0.368139	0.344345	0.347824	0.375865	0.413955	0.462602	0.503316	0.515806	0.507028	0.502457	0.493887	0.520014	0.570835	0.654362	0.731192	0.805538	0.837809	0.8067	0.727037	0.619196
-2.5848	-3.0652	-3.54426	-3.87637	-3.87889	-3.43548	-2.64903	-1.75952	-1.04546	-0.5769	-0.277995	-0.0437117	0.10762	0.169459	0.118945	-0.00174265	-0.144323	-0.293389	-0.462535	-0.685878	-0.979502	-1.30911	-1.61477	-1.83639	-1.9037	-1.77155	-1.40993	-0.81143	-0.0712503	0.692076	1.30029	1.63977	1.74558	1.70549	1.61919	1.57247	1.5838	1.6203	1.63138	1.62114	1.59975	1.57997	1.54832	1.52154	1.50948	1.50691	1.51797	1.5427	1.59162	1.63954
1.379	1.41935	1.48211	1.56338	1.65923	1.7597	1.84749	1.91403	1.94768	1.92089	1.80813	1.63337	1.43941	1.29147	1.22366	1.23646	1.3084	1.39989	1.48564	1.5765	1.72415	1.97378	2.32114	2.7251	3.12286	3.46391	3.7197	3.84688	3.85632	3.77384	3.62059	3.45973	3.35975	3.31427	3.30538	3.31251	3.31797	3.31656	3.30819	3.28761	3.28189	3.29031	3.32006	3.35676	3.38229	3.36572	3.30919	3.22906	3.15737	3.10764
-1.87354	-1.93506	-1.97241	-2.00493	-2.02513	-2.01587	-1.96886	-1.85072	-1.6932	-1.49459	-1.26062	-0.999409	-0.74521	-0.514695	-0.325383	-0.165795	-0.0276154	0.0892224	0.171157	0.210898	0.215287	0.187311	0.154536	0.133075	0.137327	0.152764	0.185362	0.224118	0.261035	0.285742	0.299158	0.294699	0.282331	0.240946	0.207263	0.199618	0.234437	0.317201	0.416333	0.514904	0.572308	0.597253	0.585065	0.572091	0.557091	0.52652	0.477194	0.410092	0.345432	0.304089
-0.981861	-1.11621	-1.25441	-1.38237	-1.49544	-1.58466	-1.64445	-1.66304	-1.62921	-1.54644	-1.40268	-1.16096	-0.813212	-0.348303	0.190907	0.765756	1.29386	1.74033	2.08261	2.33888	2.51446	2.64394	2.7458	2.79488	2.77891	2.6964	2.55371	2.3844	2.22871	2.10416	2.01075	1.93731	1.8907	1.87922	1.89201	1.90106	1.92666	1.96235	2.01683	2.08211	2.15685	2.22961	2.29584	2.34665	2.37792	2.38392	2.358	2.30541	2.23673	2.1836
-0.589282	-0.337213	0.0421541	0.482419	0.90022	1.1768	1.26429	1.20201	1.05883	0.847786	0.536022	0.132871	-0.305948	-0.679559	-0.911498	-0.981273	-0.895322	-0.70834	-0.412519	-0.0309429	0.395538	0.751989	0.948362	0.918869	0.680944	0.330768	-0.0191483	-0.245409	-0.308734	-0.237594	-0.125456	-0.0598678	-0.044652	-0.0281437	0.0474945	0.220943	0.491756	0.781004	1.03662	1.20243	1.30314	1.35334	1.37179	1.36649	1.34115	1.28204	1.21413	1.1451	1.08103	1.03839
0.00963673	-0.0374444	-0.0447749	-0.0163579	0.0787769	0.225916	0.407813	0.570857	0.697387	0.759536	0.754072	0.690384	0.57774	0.463445	0.359756	0.269626	0.1799	0.0887314	-0.0232062	-0.176504	-0.385353	-0.631314	-0.880492	-1.09046	-1.22171	-1.27709	-1.24344	-1.14977	-0.999043	-0.817395	-0.646679	-0.509451	-0.428928	-0.383595	-0.318646	-0.223067	-0.0787812	0.073085	0.212686	0.296437	0.31493	0.281764	0.231509	0.176591	0.140695	0.120957	0.0987261	0.069022	0.0328046	-0.00626069
1.13221	1.43539	1.71535	1.91779	2.00067	1.99	1.90227	1.74786	1.58938	1.49934	1.52895	1.68261	1.92005	2.1658	2.37545	2.47507	2.44202	2.26909	2.00133	1.69595	1.42951	1.2393	1.13133	1.12667	1.24761	1.47357	1.72758	1.94275	2.0745	2.13227	2.1382	2.09995	2.06366	2.08871	2.2051	2.38426	2.55455	2.65846	2.68043	2.64503	2.54546	2.38479	2.17256	1.92249	1.67755	1.46501	1.30867	1.21356	1.15263	1.11968
-2.01358	-2.02497	-1.99336	-1.92589	-1.80717	-1.62898	-1.42663	-1.2426	-1.12642	-1.07042	-1.06666	-1.11848	-1.2042	-1.31313	-1.41857	-1.48693	-1.47797	-1.40443	-1.30087	-1.20492	-1.12469	-1.06044	-1.02849	-1.00372	-0.98999	-0.981028	-0.992217	-1.01581	-1.04925	-1.12697	-1.29603	-1.58745	-1.96891	-2.38538	-2.74905	-2.98201	-3.05381	-2.97914	-2.79773	-2.51128	-2.14915	-1.71744	-1.25921	-0.806786	-0.414637	-0.14925	-0.0029024	0.0945677	0.209506	0.339207
1.08405	1.06969	1.04348	0.999207	0.942712	0.886823	0.840577	0.815421	0.811627	0.823849	0.849496	0.882603	0.91354	0.934613	0.947461	0.951485	0.960669	0.97348	0.984473	0.967232	0.893676	0.736657	0.503926	0.221387	-0.0582816	-0.297204	-0.480153	-0.614098	-0.724888	-0.818644	-0.882956	-0.903063	-0.84693	-0.704454	-0.483368	-0.21517	0.0664526	0.323329	0.53053	0.677745	0.767393	0.825928	0.856669	0.868534	0.873667	0.863816	0.834849	0.7859	0.729486	0.683388
0.50382	0.460695	0.403351	0.33844	0.313476	0.338927	0.400252	0.494624	0.57932	0.648443	0.704909	0.77615	0.890589	1.06161	1.2516	1.41958	1.5303	1.58795	1.62372	1.64051	1.62969	1.55502	1.41848	1.24731	1.06213	0.876118	0.682877	0.463924	0.203971	-0.0921508	-0.391321	-0.640108	-0.777527	-0.802847	-0.692703	-0.452968	-0.0898521	0.342756	0.770751	1.12195	1.34735	1.44514	1.42795	1.34125	1.19092	0.95767	0.63147	0.239493	-0.199933	-0.591764
-1.53293	-1.60109	-1.68217	-1.77157	-1.86133	-1.95349	-2.04362	-2.0941	-2.10218	-2.08744	-2.05506	-2.02811	-2.01263	-1.99238	-1.98054	-1.97171	-1.96845	-1.95916	-1.93533	-1.86992	-1.77588	-1.64784	-1.50543	-1.36956	-1.23119	-1.05115	-0.841152	-0.555291	-0.210926	0.117046	0.377685	0.516715	0.489059	0.349681	0.18378	0.0585487	0.0308699	0.0958168	0.21218	0.304204	0.352769	0.351089	0.358975	0.38877	0.460223	0.566845	0.665394	0.719336	0.754495	0.772361
-0.699375	-0.62254	-0.496726	-0.322426	-0.109595	0.112514	0.317715	0.483242	0.591902	0.637473	0.649965	0.653289	0.656507	0.664917	0.663116	0.640092	0.59128	0.525554	0.437186	0.342798	0.248913	0.189644	0.189935	0.275288	0.435335	0.635842	0.868047	1.09518	1.32688	1.53573	1.69069	1.78446	1.82641	1.84452	1.86934	1.89558	1.92422	1.93812	1.91947	1.87713	1.82937	1.77472	1.72799	1.67919	1.6236	1.5701	1.54197	1.53791	1.54655	1.55251
-1.05248	-1.16465	-1.32011	-1.49375	-1.66237	-1.7833	-1.82058	-1.76292	-1.61519	-1.40625	-1.17378	-0.949237	-0.770876	-0.656672	-0.620797	-0.648229	-0.722036	-0.824511	-0.936332	-1.01306	-1.04568	-1.02766	-0.968543	-0.883794	-0.787535	-0.685154	-0.548163	-0.381346	-0.19736	0.00382924	0.214959	0.44675	0.675384	0.890175	1.06804	1.17999	1.24287	1.27762	1.30157	1.33558	1.37321	1.39418	1.38264	1.33642	1.28016	1.2331	1.20558	1.19632	1.20131	1.21297
-0.735784	-0.644251	-0.548066	-0.435167	-0.293583	-0.132437	0.0323347	0.155577	0.204658	0.176264	0.0905823	-0.0166925	-0.107367	-0.151468	-0.139526	-0.0869598	-0.0264343	0.0157797	0.0155813	-0.0185483	-0.0670508	-0.131059	-0.171413	-0.210106	-0.248259	-0.254323	-0.170651	0.0535483	0.408563	0.826105	1.21324	1.49663	1.63572	1.68282	1.68984	1.70041	1.75655	1.88034	2.04521	2.1996	2.30641	2.35802	2.3676	2.36682	2.38271	2.426	2.4736	2.51855	2.53564	2.53748
-1.65387	-1.57648	-1.41503	-1.20953	-0.946886	-0.634481	-0.318512	-0.0273189	0.216468	0.389542	0.454096	0.379495	0.284944	0.191998	0.09226	-0.0651604	-0.220235	-0.401865	-0.594638	-0.777005	-0.92671	-0.98909	-0.96249	-0.892087	-0.815589	-0.708013	-0.575551	-0.380122	-0.179143	-0.0448625	-0.0403465	-0.117655	-0.292871	-0.420747	-0.407101	-0.252212	-0.00941991	0.201969	0.359368	0.470324	0.568063	0.651768	0.773802	0.793387	0.768082	0.638336	0.420582	0.149801	-0.0674286	-0.136292
-0.517032	-0.455872	-0.340052	-0.213371	-0.112456	-0.110851	-0.163769	-0.200836	-0.144783	0.0644778	0.2908	0.404367	0.389603	0.297882	0.245438	0.273816	0.298467	0.348594	0.395492	0.444599	0.555447	0.69136	0.804185	0.834075	0.797666	0.678677	0.553287	0.445854	0.38802	0.343546	0.29125	0.230992	0.245631	0.376312	0.536431	0.6775	0.694712	0.59043	0.435843	0.312299	0.295619	0.314237	0.348513	0.329277	0.237444	0.122051	0.0197689	-0.0620196	-0.152932	-0.240119
0.379266	0.197362	0.0815606	-0.0241722	-0.0828728	-0.0798472	-0.0730261	-0.0383262	-0.05058	-0.0869892	-0.146844	-0.189415	-0.223962	-0.308814	-0.378098	-0.432458	-0.494348	-0.608193	-0.706233	-0.754052	-0.699177	-0.585713	-0.414899	-0.186897	-0.0384021	-0.00883725	-0.0515979	-0.0995609	-0.109415	-0.032011	0.0882683	0.228965	0.300603	0.245916	0.0660088	-0.158568	-0.279885	-0.278931	-0.158522	-0.0184532	0.118439	0.135681	0.0306774	-0.201756	-0.478578	-0.710988	-0.767772	-0.651005	-0.381026	-0.0805572
-0.336059	-0.371921	-0.372327	-0.346156	-0.33082	-0.249511	-0.17186	-0.146416	-0.208538	-0.317794	-0.493729	-0.655269	-0.724252	-0.705366	-0.673659	-0.592935	-0.472922	-0.326159	-0.186118	-0.0948714	-0.0524338	-0.0642859	-0.172846	-0.345158	-0.471948	-0.497791	-0.440375	-0.41645	-0.457098	-0.456556	-0.373373	-0.193543	0.0542418	0.298198	0.457465	0.509331	0.391778	0.142809	-0.140132	-0.404546	-0.507174	-0.459357	-0.35306	-0.229528	-0.0951034	0.045416	0.186443	0.325996	0.406654	0.44046
-0.00740493	0.161232	0.295168	0.362283	0.275977	0.0875832	-0.0984791	-0.184253	-0.156283	-0.0884278	-0.0611672	-0.082992	-0.200813	-0.292374	-0.247976	-0.0706673	0.185354	0.394465	0.513623	0.519513	0.502632	0.448787	0.430173	0.454845	0.513794	0.597877	0.652477	0.63531	0.547646	0.411066	0.263982	0.153767	0.0714389	0.0846244	0.161093	0.275196	0.414984	0.549879	0.635154	0.598898	0.485549	0.368971	0.284052	0.194537	0.0504129	-0.118249	-0.265728	-0.300958	-0.189996	0.103138
0.104572	0.289208	0.423538	0.505537	0.421601	0.212874	-0.115229	-0.394932	-0.441108	-0.22573	0.200898	0.639785	0.87908	0.927103	0.915742	1.02434	1.23076	1.4731	1.6809	1.81805	1.75268	1.5645	1.19518	0.819697	0.546646	0.439362	0.479705	0.558657	0.584847	0.558363	0.564153	0.674806	0.870544	1.04358	1.10877	1.09888	1.01927	0.965089	0.977958	0.997785	1.00899	0.942885	0.795694	0.635851	0.592231	0.639856	0.768341	0.947576	1.06291	1.08451
0.393879	0.464805	0.47001	0.417213	0.326529	0.25493	0.229599	0.229679	0.175696	0.0642238	-0.0835672	-0.232347	-0.284266	-0.258491	-0.117335	0.121746	0.37802	0.523807	0.544279	0.50134	0.49986	0.611547	0.796639	0.948875	0.991813	0.900529	0.738618	0.544005	0.334577	0.136059	0.00994917	0.00235155	0.0478123	0.129764	0.211971	0.275861	0.326757	0.417118	0.488017	0.475772	0.388952	0.231312	0.148715	0.144467	0.218879	0.248811	0.172423	-0.0269558	-0.276329	-0.472849
-0.483301	-0.383268	-0.328435	-0.296761	-0.299183	-0.372788	-0.464593	-0.586835	-0.698755	-0.769086	-0.804136	-0.805201	-0.731576	-0.623706	-0.457313	-0.274782	-0.150961	-0.135581	-0.223752	-0.454357	-0.716036	-0.922306	-1.01092	-0.946507	-0.77972	-0.622267	-0.506559	-0.418172	-0.295456	-0.152914	-0.030708	0.0162821	0.0424945	0.0325141	0.0821167	0.139396	0.136244	0.0803423	-0.0156449	-0.0559064	0.0105588	0.170244	0.378166	0.521457	0.549473	0.520579	0.480226	0.444649	0.403066	0.333361
-0.444764	-0.280676	-0.211452	-0.181237	-0.228609	-0.317009	-0.39511	-0.45214	-0.502156	-0.492231	-0.440978	-0.377082	-0.278464	-0.174532	-0.0807659	-0.00740025	0.0551139	0.110892	0.174397	0.196488	0.177948	0.101162	-0.0622351	-0.287249	-0.510998	-0.6219	-0.568981	-0.378352	-0.160639	-0.0197559	0.00318745	-0.107226	-0.215348	-0.285022	-0.314485	-0.393442	-0.435611	-0.441229	-0.429132	-0.375708	-0.319333	-0.253134	-0.223814	-0.232683	-0.252728	-0.205265	-0.0943666	0.102972	0.343522	0.512106
-0.0511205	-0.0299353	-0.0327155	0.000691073	0.0272835	-0.0114531	-0.00183312	0.064163	0.149481	0.207731	0.141746	0.0382038	-0.0930644	-0.30293	-0.493174	-0.610647	-0.648256	-0.547231	-0.398253	-0.196137	-0.0253682	0.113011	0.194758	0.227555	0.174573	0.155286	0.245913	0.3153	0.387423	0.367355	0.3079	0.316506	0.407598	0.477883	0.49482	0.427814	0.331735	0.241461	0.157578	0.163249	0.306653	0.56351	0.882455	1.18345	1.3708	1.45523	1.47461	1.51676	1.49678	1.42655
-0.356676	-0.587281	-0.825401	-0.894498	-0.850615	-0.693169	-0.544889	-0.460152	-0.372547	-0.253512	-0.0580254	0.158571	0.344362	0.435622	0.410909	0.247854	0.0582808	-0.0665291	-0.127536	-0.0687246	0.023755	0.0990032	0.110462	0.0119759	-0.132391	-0.250035	-0.262406	-0.192827	-0.150158	-0.157871	-0.166819	-0.121249	0.0366783	0.217998	0.347753	0.392289	0.36301	0.292439	0.225739	0.183342	0.195805	0.335063	0.556848	0.816638	0.980161	1.00727	0.957506	0.887066	0.850541	0.841038
0.357418	0.431336	0.512529	0.552062	0.483575	0.426702	0.415829	0.525443	0.714674	0.880362	0.853508	0.575708	0.152625	-0.258569	-0.513776	-0.573325	-0.492115	-0.307286	-0.0838026	0.179548	0.431254	0.634631	0.753011	0.753188	0.692349	0.615068	0.623321	0.730398	0.892241	0.958326	0.895402	0.784326	0.708222	0.693626	0.795407	0.975641	1.15674	1.29061	1.32939	1.4056	1.44965	1.453	1.33062	1.07394	0.77274	0.551318	0.520827	0.662279	0.93903	1.22477
0.251505	0.345886	0.392933	0.334852	0.210847	0.0927663	0.0639042	0.075631	0.0786209	0.02277	-0.0332461	-0.119378	-0.147091	-0.0952138	-0.0206633	-0.0572716	-0.222061	-0.403983	-0.57573	-0.65495	-0.5069	-0.224672	0.146708	0.43607	0.580338	0.600268	0.58011	0.529308	0.467513	0.295007	-0.0073248	-0.304954	-0.544145	-0.662832	-0.637894	-0.47232	-0.298711	-0.0812436	0.0937244	0.169314	0.0866038	-0.110102	-0.298179	-0.416004	-0.46166	-0.4186	-0.419811	-0.399037	-0.265937	-0.00733073
-0.169997	-0.165007	-0.124276	-0.128018	-0.166809	-0.176822	-0.102593	0.035105	0.155586	0.166347	0.0925551	-0.0116388	-0.125296	-0.20167	-0.210848	-0.225406	-0.233866	-0.23334	-0.197741	-0.0944168	0.0621934	0.230388	0.33186	0.377581	0.379455	0.384941	0.358387	0.38284	0.428756	0.491639	0.526565	0.578843	0.70638	0.8322	0.937689	1.01912	1.01546	0.917752	0.826086	0.745276	0.728211	0.77536	0.786391	0.709462	0.576713	0.521985	0.579252	0.694073	0.810386	0.901274
0.751675	0.512398	0.275216	0.0964681	0.0340961	0.171327	0.37593	0.574327	0.709387	0.757093	0.633896	0.458548	0.241596	0.0517343	-0.0398792	-0.0263305	0.0388222	0.0284868	-0.0539331	-0.198642	-0.328924	-0.451597	-0.457624	-0.409763	-0.310952	-0.181447	-0.031269	0.103585	0.216351	0.293822	0.370033	0.397801	0.315414	0.19152	0.054116	0.00582868	0.137813	0.386392	0.588481	0.620628	0.373603	0.0550379	-0.166902	-0.164686	0.0194726	0.234082	0.33268	0.346711	0.315598	0.282976
-0.139495	-0.103553	-0.0706576	-0.0592228	-0.0888095	-0.103088	-0.129587	-0.141333	-0.122379	-0.112276	-0.140618	-0.21182	-0.315303	-0.441023	-0.587522	-0.685491	-0.714018	-0.630085	-0.46427	-0.279449	-0.20206	-0.245835	-0.432697	-0.614165	-0.724915	-0.719658	-0.576629	-0.325514	-0.0584736	0.13385	0.21271	0.241639	0.246574	0.262197	0.393448	0.568885	0.722858	0.859127	0.88833	0.843932	0.763313	0.682627	0.591563	0.544323	0.51919	0.521867	0.573818	0.604471	0.691247	0.759184
0.0814681	0.150192	0.240158	0.329536	0.432708	0.504226	0.511512	0.353363	0.131265	-0.0308405	-0.0795558	-0.0386094	0.0390346	0.0850191	0.119138	0.175367	0.261994	0.2975	0.324172	0.372136	0.499945	0.680799	0.838652	0.974945	1.00623	0.927994	0.840696	0.727064	0.660422	0.643881	0.684273	0.696411	0.625333	0.393936	0.110543	-0.129233	-0.190539	-0.0146752	0.265342	0.484968	0.629566	0.677181	0.679372	0.666514	0.580955	0.462522	0.274824	0.090237	0.0291721	0.0919473
0.368147	0.419658	0.460648	0.50825	0.56359	0.638062	0.751822	0.850027	0.910438	0.880633	0.776075	0.60679	0.431153	0.277126	0.164237	0.154995	0.197573	0.317023	0.416946	0.532091	0.604075	0.657734	0.6212	0.548364	0.406397	0.285565	0.198102	0.109154	-0.0283202	-0.2369	-0.434709	-0.529319	-0.461189	-0.251195	0.000919987	0.223985	0.371105	0.539083	0.696465	0.801524	0.833375	0.751889	0.594366	0.431737	0.282621	0.239414	0.289765	0.410637	0.542495	0.671921
-0.0442756	-0.332375	-0.543901	-0.617213	-0.559516	-0.455319	-0.366688	-0.335047	-0.365673	-0.394507	-0.329549	-0.227952	-0.201136	-0.218882	-0.313149	-0.40075	-0.49645	-0.59647	-0.751205	-0.945815	-1.18478	-1.34065	-1.3297	-1.20426	-1.01561	-0.81183	-0.598791	-0.426015	-0.270705	-0.19899	-0.0882769	0.103806	0.317862	0.531026	0.640105	0.704094	0.755025	0.861769	0.942546	0.975645	0.897836	0.754375	0.548414	0.371324	0.253122	0.255249	0.315793	0.369223	0.407083	0.461756
-0.339559	-0.0528828	0.194402	0.439944	0.626754	0.782794	0.868371	0.886299	0.87444	0.799508	0.682812	0.549447	0.389241	0.26204	0.206408	0.226821	0.282788	0.388327	0.481228	0.510366	0.497933	0.435978	0.324625	0.155273	-0.0139811	-0.210786	-0.370532	-0.44664	-0.388343	-0.204095	-0.0138268	0.0978199	0.138191	0.0627843	-0.0252307	-0.0523875	0.0380758	0.147659	0.223567	0.259875	0.232496	0.197752	0.169527	0.165913	0.182746	0.208569	0.297287	0.441217	0.621748	0.79115
-0.186573	-0.155593	-0.158688	-0.21638	-0.303755	-0.339771	-0.316056	-0.155658	0.0719533	0.232455	0.333375	0.372982	0.355849	0.357345	0.397854	0.426165	0.499654	0.638628	0.841373	1.01302	1.12958	1.04758	0.793311	0.483055	0.201777	0.00477688	-0.180873	-0.409968	-0.630641	-0.816723	-0.897389	-0.875536	-0.757183	-0.541479	-0.333001	-0.0832925	0.178681	0.387429	0.535009	0.585	0.541007	0.424218	0.285763	0.171284	0.167149	0.253827	0.309965	0.275047	0.215576	0.160194
0.460403	0.569363	0.65204	0.579716	0.366301	0.0590229	-0.229899	-0.406694	-0.436972	-0.353331	-0.226632	-0.121811	-0.0416913	-0.0341673	-0.0990689	-0.184262	-0.208571	-0.179599	-0.159017	-0.218459	-0.357909	-0.518807	-0.653236	-0.702331	-0.658426	-0.574633	-0.54438	-0.581731	-0.675813	-0.777114	-0.89331	-0.99348	-1.07815	-1.13888	-1.17753	-1.17319	-1.13187	-1.09307	-1.0789	-1.13605	-1.23725	-1.3348	-1.4233	-1.45515	-1.46982	-1.50262	-1.5389	-1.54177	-1.5318	-1.4137
-0.23789	-0.305179	-0.407736	-0.456699	-0.46457	-0.454939	-0.431693	-0.452505	-0.492812	-0.488012	-0.436003	-0.321419	-0.195704	-0.130352	-0.189233	-0.312197	-0.527991	-0.738625	-0.913823	-1.01218	-1.03292	-1.00104	-0.873756	-0.647964	-0.312188	-0.0135568	0.200654	0.243648	0.146226	-0.0599654	-0.324415	-0.563013	-0.724594	-0.764966	-0.71185	-0.522245	-0.257687	0.0696713	0.391133	0.664534	0.829681	0.811152	0.652506	0.374445	-0.00543687	-0.378658	-0.608809	-0.651158	-0.545074	-0.422116
-0.210958	-0.312429	-0.436729	-0.56943	-0.628752	-0.607829	-0.575522	-0.581712	-0.597144	-0.586452	-0.528438	-0.40791	-0.254355	-0.179898	-0.253709	-0.453103	-0.63017	-0.768575	-0.836329	-0.794417	-0.691665	-0.63441	-0.684556	-0.798238	-0.904381	-0.879381	-0.738244	-0.535001	-0.395189	-0.350567	-0.386573	-0.466238	-0.51799	-0.535382	-0.531204	-0.569129	-0.656914	-0.813962	-0.963484	-1.08164	-1.12167	-1.06125	-0.90687	-0.800015	-0.739429	-0.694348	-0.592063	-0.416143	-0.182618	0.116926
-0.587221	-0.459444	-0.334096	-0.216804	-0.198943	-0.288526	-0.448368	-0.558995	-0.521594	-0.332693	-0.0317678	0.20107	0.277229	0.141862	-0.126916	-0.426583	-0.646719	-0.729412	-0.725401	-0.638411	-0.529924	-0.419669	-0.347074	-0.26559	-0.19184	-0.175266	-0.277108	-0.413724	-0.570884	-0.691661	-0.722539	-0.65108	-0.487978	-0.236149	0.0268812	0.257737	0.395288	0.488813	0.574721	0.631235	0.569418	0.421713	0.224914	0.0265686	-0.123098	-0.199053	-0.159325	-0.0563145	0.0479474	0.0149343
0.364981	0.365707	0.28633	0.0838197	-0.142469	-0.330286	-0.375315	-0.151259	0.188526	0.4769	0.612338	0.532333	0.365585	0.174325	-0.00275812	-0.151995	-0.2988	-0.454306	-0.509432	-0.526362	-0.53837	-0.529969	-0.561232	-0.628222	-0.68509	-0.703708	-0.665492	-0.540291	-0.340919	-0.0732241	0.164737	0.286973	0.264364	0.206432	0.196385	0.29925	0.427282	0.509894	0.548099	0.568709	0.61553	0.694496	0.784148	0.730517	0.546164	0.245116	0.0170326	-0.0138578	0.165544	0.456769
0.0285768	0.00927841	-0.00308324	-0.0591514	-0.089649	-0.120293	-0.126728	-0.0816097	-0.00765763	0.0313227	-0.0774593	-0.27021	-0.498462	-0.637537	-0.668021	-0.49748	-0.190705	0.174323	0.445317	0.540743	0.445074	0.233307	0.0746396	0.0411113	0.142746	0.287491	0.395067	0.409934	0.356194	0.330107	0.319268	0.293471	0.236548	0.110944	-0.0210149	-0.126595	-0.109426	-0.0644579	0.0124808	0.0540576	0.0369888	0.00320968	-0.0525854	-0.0476294	-0.0112913	0.0272492	0.0196518	0.00871065	-0.0369413	-0.00971009
0.548099	0.36936	0.210195	0.0881184	-0.00743114	-0.0854967	-0.185656	-0.322007	-0.46646	-0.54167	-0.536474	-0.437232	-0.294407	-0.163022	-0.0607163	0.0384131	0.169861	0.29614	0.445899	0.545058	0.571795	0.545953	0.500584	0.416673	0.282726	0.151385	0.0245238	-0.0923561	-0.181045	-0.2639	-0.282375	-0.26708	-0.257254	-0.212786	-0.115653	0.0452518	0.259232	0.42828	0.518507	0.445018	0.229952	-0.0538356	-0.244973	-0.319652	-0.231594	-0.0680897	0.13598	0.307325	0.358672	0.321772
-0.0770057	-0.105685	-0.220442	-0.365863	-0.506656	-0.620162	-0.620121	-0.579877	-0.540914	-0.485698	-0.429409	-0.312523	-0.129958	0.0604226	0.192337	0.24627	0.25939	0.242517	0.228933	0.180956	0.146438	0.086888	-0.010646	-0.0646603	-0.076441	-0.0370007	-0.0173506	-0.0801018	-0.178191	-0.266651	-0.361846	-0.444578	-0.450535	-0.385163	-0.258222	-0.122244	0.0346741	0.171286	0.233208	0.227762	0.229233	0.250452	0.218848	0.159378	0.036561	-0.0664158	-0.0901788	-0.0648686	-0.0161168	-0.043841
-0.0121943	-0.00604084	-0.000966201	-0.0316718	-0.106442	-0.27847	-0.467175	-0.59824	-0.658092	-0.603438	-0.485571	-0.383267	-0.331486	-0.291976	-0.256137	-0.205614	-0.173455	-0.164718	-0.204995	-0.280894	-0.382396	-0.488395	-0.557431	-0.548852	-0.51459	-0.455731	-0.417535	-0.427676	-0.445551	-0.528564	-0.606024	-0.651791	-0.673986	-0.689188	-0.754043	-0.863847	-1.05009	-1.29988	-1.54253	-1.70199	-1.75462	-1.67004	-1.52163	-1.44417	-1.40962	-1.43577	-1.44969	-1.42671	-1.33817	-1.25377
-0.664464	-0.722247	-0.773368	-0.816622	-0.765333	-0.685335	-0.556156	-0.476644	-0.47667	-0.569687	-0.583905	-0.587031	-0.643723	-0.789895	-1.06877	-1.25412	-1.28456	-1.10134	-0.775526	-0.397354	-0.0943084	0.0940874	0.143949	0.0535238	-0.0643437	-0.177647	-0.240863	-0.206628	-0.0498318	0.0746619	0.125303	0.0973892	0.042045	-0.0257335	-0.0908127	-0.15328	-0.222005	-0.312294	-0.348509	-0.304138	-0.213556	-0.0910599	0.0876942	0.32517	0.56799	0.792927	0.921056	0.994762	0.942359	0.818092
-0.826065	-0.40844	-0.0293323	0.236321	0.340917	0.306333	0.142504	-0.0580739	-0.188759	-0.254447	-0.325894	-0.341134	-0.278158	-0.158647	0.0516043	0.324365	0.566051	0.706249	0.715997	0.610672	0.520091	0.403676	0.218494	-0.0406377	-0.252841	-0.399768	-0.431812	-0.369924	-0.346466	-0.380371	-0.491444	-0.577454	-0.561974	-0.424582	-0.275461	-0.088352	0.08725	0.162934	0.216509	0.257369	0.317464	0.411747	0.456032	0.453419	0.46431	0.528801	0.636985	0.780725	0.824378	0.776357
0.181247	0.255922	0.388184	0.523159	0.69065	0.848349	0.958939	1.05011	1.1006	1.18624	1.21056	1.24955	1.23561	1.16918	1.06008	0.940144	0.830447	0.741207	0.675867	0.69756	0.757427	0.828404	0.740189	0.488367	0.159977	-0.17545	-0.417333	-0.585426	-0.730673	-0.929572	-1.08249	-1.08976	-0.918163	-0.621435	-0.275253	-0.0280886	-0.00253529	-0.10055	-0.208796	-0.244416	-0.095798	0.033137	0.143344	0.0714884	-0.110526	-0.290569	-0.32376	-0.173925	0.0677206	0.276119
-0.739727	-0.494409	-0.196951	0.1297	0.494746	0.734066	0.770931	0.569942	0.214337	-0.126821	-0.371686	-0.526649	-0.540563	-0.521895	-0.454501	-0.307745	-0.123904	0.0911039	0.25373	0.297357	0.258368	0.135397	-0.0807842	-0.376074	-0.682851	-0.932307	-1.02841	-0.953749	-0.757997	-0.585181	-0.474153	-0.407292	-0.428874	-0.460755	-0.414504	-0.332815	-0.250337	-0.176651	-0.164031	-0.197304	-0.251667	-0.323589	-0.332955	-0.322264	-0.297208	-0.192655	-0.0260879	0.212985	0.425261	0.52051
-0.180165	-0.172103	-0.142619	-0.132243	-0.177919	-0.298487	-0.492543	-0.719995	-0.862267	-0.874687	-0.74071	-0.547493	-0.370567	-0.248599	-0.206683	-0.238962	-0.271173	-0.295667	-0.282178	-0.250319	-0.236132	-0.239528	-0.256422	-0.226161	-0.14911	-0.0791757	-0.0261271	-0.0553615	-0.137364	-0.265951	-0.366843	-0.421926	-0.425106	-0.412304	-0.371543	-0.328097	-0.316492	-0.341551	-0.429525	-0.470519	-0.478694	-0.444065	-0.379097	-0.285035	-0.17508	-0.0452184	0.0401465	0.0250226	-0.128646	-0.307178
-0.0515575	-0.0961902	-0.112747	-0.156534	-0.162348	-0.208371	-0.308388	-0.40205	-0.46177	-0.503903	-0.509765	-0.496439	-0.481947	-0.4926	-0.560753	-0.616923	-0.632047	-0.562449	-0.415988	-0.290164	-0.165689	-0.0513946	0.0813871	0.246682	0.350658	0.354394	0.247413	0.138221	0.100234	0.10093	0.0613709	0.000241224	-0.0484367	-0.0323962	0.0705349	0.139821	0.209732	0.212512	0.225601	0.245929	0.223782	0.120403	-0.0881028	-0.257518	-0.278334	-0.176797	-0.0312297	0.0722691	0.0981623	0.0429196
-0.150743	0.191221	0.47332	0.593434	0.516979	0.33746	0.0895571	-0.109293	-0.201041	-0.121533	0.0750043	0.293924	0.418422	0.439264	0.325399	0.149174	-0.00298789	-0.160516	-0.318788	-0.427293	-0.466068	-0.389734	-0.246657	-0.0949748	0.0775134	0.153213	0.149052	0.105011	0.0521039	0.0385499	0.056632	0.104137	0.268598	0.496427	0.713576	0.812683	0.726422	0.461377	0.146004	-0.137789	-0.3065	-0.308803	-0.182372	0.018221	0.16924	0.275627	0.313763	0.342126	0.333164	0.306469
0.264222	-0.0174322	-0.282302	-0.508473	-0.566954	-0.482242	-0.317371	-0.221815	-0.22141	-0.336416	-0.470804	-0.524981	-0.597588	-0.71408	-0.78926	-0.835434	-0.772052	-0.649514	-0.524571	-0.463194	-0.472609	-0.510856	-0.469964	-0.384508	-0.321399	-0.260924	-0.254343	-0.290871	-0.428126	-0.535652	-0.583523	-0.568173	-0.467531	-0.282967	-0.0148081	0.25769	0.470961	0.553778	0.514761	0.336131	0.180997	0.0320027	-0.107307	-0.172753	-0.16746	-0.0161767	0.172049	0.386531	0.501237	0.474991
-0.524757	-0.462936	-0.276086	-0.067513	0.0944414	0.14826	0.102656	0.0241599	-0.00233923	0.0409403	0.154729	0.258835	0.351439	0.402924	0.369194	0.246883	0.100395	-0.0363785	-0.145955	-0.20267	-0.262702	-0.284088	-0.307632	-0.318855	-0.334826	-0.363073	-0.387493	-0.353862	-0.197948	0.0964487	0.398003	0.531299	0.448921	0.212563	-0.0207865	-0.191071	-0.237043	-0.214937	-0.220293	-0.276626	-0.321484	-0.319773	-0.265519	-0.187735	-0.166677	-0.163145	-0.249197	-0.397284	-0.466576	-0.448361
-0.0118176	-0.241212	-0.382589	-0.336364	-0.0985791	0.208712	0.461338	0.559331	0.573623	0.501603	0.342454	0.181595	0.0304957	-0.100783	-0.208623	-0.271488	-0.292748	-0.257535	-0.179041	-0.0352741	0.112434	0.258651	0.315506	0.246182	0.0680792	-0.212666	-0.467934	-0.664655	-0.727816	-0.634754	-0.407119	-0.148057	0.00645577	0.0509871	0.0127355	-0.0784999	-0.170545	-0.276616	-0.333637	-0.347328	-0.265521	-0.125415	0.0728295	0.270679	0.458344	0.608867	0.673282	0.637002	0.51261	0.392452
0.499018	0.0570848	-0.360258	-0.705605	-0.860166	-0.791919	-0.613737	-0.388305	-0.25295	-0.249073	-0.33102	-0.47283	-0.540983	-0.529741	-0.446667	-0.370587	-0.320943	-0.33149	-0.302225	-0.192455	-0.093634	-0.0520346	-0.0110226	0.01524	0.0466126	0.0566563	0.0695192	0.113177	0.197474	0.310686	0.434546	0.502681	0.503879	0.39218	0.16962	-0.0865242	-0.226219	-0.203225	-0.026228	0.238181	0.409043	0.447216	0.283496	-0.0268978	-0.425529	-0.704732	-0.840168	-0.780312	-0.632095	-0.437807
1.20205	1.20704	1.23911	1.31386	1.42999	1.58976	1.77129	1.94169	2.08449	2.18733	2.2627	2.30758	2.34164	2.39793	2.48507	2.59515	2.7139	2.82705	2.88924	2.86454	2.79106	2.72736	2.71818	2.77783	2.87988	2.96736	3.00075	2.96485	2.8752	2.76476	2.63429	2.53438	2.429	2.29034	2.10524	1.90388	1.7289	1.64234	1.65839	1.75294	1.86661	1.89457	1.83255	1.71451	1.59087	1.52342	1.49234	1.48697	1.50138	1.56028
-2.12311	-2.08171	-2.04982	-2.02509	-1.97995	-1.86737	-1.63765	-1.30017	-0.909682	-0.544632	-0.248967	-0.0256593	0.138774	0.270403	0.39216	0.510958	0.634614	0.743105	0.842553	0.915763	0.948409	0.919755	0.824537	0.67983	0.494285	0.30461	0.119761	-0.0636589	-0.206989	-0.287179	-0.30457	-0.28391	-0.257806	-0.249451	-0.265863	-0.301242	-0.358267	-0.459351	-0.565566	-0.645012	-0.658315	-0.607352	-0.563443	-0.56211	-0.579309	-0.56167	-0.477367	-0.354843	-0.278426	-0.289129
0.869489	0.883297	0.86562	0.806847	0.722264	0.63699	0.568785	0.521593	0.519664	0.538124	0.577095	0.604195	0.577199	0.512149	0.446322	0.404351	0.393833	0.437607	0.516529	0.595427	0.655871	0.711667	0.77665	0.860772	0.956066	1.0276	1.03243	1.00775	1.02702	1.12879	1.21551	1.2286	1.16472	1.10747	1.10343	1.15676	1.23544	1.32346	1.40069	1.4593	1.45435	1.36611	1.23284	1.12371	1.06631	1.04765	1.03171	1.01199	0.963383	0.880023
0.233288	0.255525	0.276495	0.305134	0.336318	0.375793	0.409246	0.431629	0.436976	0.434978	0.424763	0.431447	0.449695	0.47749	0.512065	0.541063	0.567223	0.587766	0.593566	0.56191	0.50055	0.437225	0.387164	0.322702	0.208652	-0.00448315	-0.30249	-0.638948	-0.965372	-1.22396	-1.39414	-1.48245	-1.49642	-1.47018	-1.44576	-1.43795	-1.48678	-1.56713	-1.64414	-1.69674	-1.71426	-1.6943	-1.62789	-1.49619	-1.29072	-1.0074	-0.651839	-0.322437	-0.100082	-0.0116067
-1.53759	-1.78064	-2.06549	-2.37143	-2.64559	-2.82424	-2.82728	-2.61615	-2.20485	-1.67899	-1.16244	-0.7445	-0.45054	-0.251951	-0.131332	-0.0893995	-0.136845	-0.270456	-0.471782	-0.686647	-0.86229	-0.974908	-1.03715	-1.11385	-1.2329	-1.38918	-1.54207	-1.63727	-1.60707	-1.47339	-1.26114	-0.99758	-0.768063	-0.618967	-0.577007	-0.633856	-0.787475	-1.01973	-1.27702	-1.48761	-1.63166	-1.69686	-1.68232	-1.61219	-1.51941	-1.46266	-1.4534	-1.44158	-1.37517	-1.22723
0.265858	0.215284	0.152865	0.0753634	0.00823731	-0.0369642	-0.0519548	-0.0330884	-0.00988388	0.0154264	0.042753	0.0352824	0.0158927	-0.0182075	-0.0456903	-0.0410292	-0.0104341	0.0290802	0.0488612	0.0327703	-0.0386702	-0.12519	-0.206505	-0.280134	-0.378474	-0.551715	-0.806263	-1.0914	-1.32366	-1.50195	-1.59801	-1.63707	-1.68633	-1.73251	-1.73247	-1.65456	-1.52829	-1.379	-1.23515	-1.12203	-1.06659	-1.02803	-0.984646	-0.954407	-0.972014	-1.02024	-1.09824	-1.19125	-1.27752	-1.35478
-0.700406	-0.670789	-0.624953	-0.561328	-0.489993	-0.428835	-0.381969	-0.351666	-0.300195	-0.193906	-0.0188016	0.213201	0.45475	0.659596	0.815869	0.912478	0.961078	0.980847	1.00302	1.03985	1.09047	1.14824	1.19352	1.20392	1.16345	1.07322	0.943863	0.801419	0.663332	0.528003	0.385579	0.269183	0.20115	0.198399	0.266792	0.364704	0.465614	0.559604	0.658729	0.760748	0.864047	0.95651	1.03356	1.09632	1.14177	1.18562	1.22554	1.27507	1.33116	1.38681
0.62897	0.527009	0.408264	0.269345	0.115227	-0.0489998	-0.227032	-0.404156	-0.559426	-0.695371	-0.822759	-0.960314	-1.11603	-1.3034	-1.55764	-1.85112	-2.12871	-2.30126	-2.28051	-2.0729	-1.73737	-1.41818	-1.17251	-1.03059	-1.03942	-1.16628	-1.37355	-1.63531	-1.87402	-2.04927	-2.14512	-2.12434	-2.03319	-1.91501	-1.75924	-1.60266	-1.47168	-1.32501	-1.16809	-0.960641	-0.727277	-0.494957	-0.276607	-0.0837913	0.089838	0.289502	0.49889	0.690001	0.834482	0.897946
1.00493	1.10995	1.20999	1.30638	1.42107	1.5515	1.67627	1.74185	1.71103	1.59804	1.44074	1.30804	1.24093	1.25948	1.32675	1.42177	1.52807	1.65654	1.83387	2.07219	2.32857	2.5279	2.62537	2.61454	2.55027	2.48656	2.4626	2.49806	2.53961	2.51882	2.39597	2.17947	1.90914	1.64596	1.42814	1.27532	1.17176	1.09316	1.03017	0.995427	0.998796	1.06843	1.18794	1.3533	1.52729	1.71336	1.90126	2.09529	2.27817	2.43283
-0.156155	-0.244681	-0.279817	-0.223307	-0.0787796	0.12524	0.342836	0.520796	0.651623	0.763075	0.876477	1.02478	1.18488	1.35297	1.48562	1.55185	1.53381	1.45225	1.32058	1.19732	1.16978	1.2532	1.43141	1.6268	1.82218	1.97794	2.08813	2.12727	2.09744	1.96531	1.72336	1.45618	1.2066	1.03344	0.96939	1.01415	1.07188	1.10426	1.14079	1.20693	1.31473	1.4233	1.50437	1.54249	1.5456	1.52152	1.50065	1.49984	1.49366	1.4794
-0.638867	-0.630964	-0.632149	-0.656334	-0.679959	-0.696655	-0.701806	-0.693604	-0.692888	-0.699812	-0.725358	-0.714174	-0.684079	-0.648077	-0.631477	-0.634837	-0.646932	-0.650396	-0.646605	-0.642251	-0.653559	-0.700483	-0.769905	-0.836947	-0.884901	-0.900506	-0.886219	-0.9312	-1.05887	-1.29047	-1.50725	-1.64941	-1.62441	-1.51368	-1.36007	-1.21718	-1.06429	-0.890671	-0.678409	-0.419689	-0.140917	0.124037	0.329922	0.466872	0.513274	0.499409	0.423081	0.332185	0.216933	0.0335887
-0.330695	-0.340079	-0.31524	-0.253904	-0.150229	-0.00508291	0.160757	0.353349	0.561803	0.796885	1.01116	1.15946	1.2162	1.19053	1.08391	0.960587	0.869896	0.817774	0.796814	0.73859	0.630732	0.524336	0.484454	0.565268	0.762567	0.986835	1.16274	1.22028	1.14865	0.977919	0.741143	0.496775	0.284742	0.123096	0.0248122	0.0426597	0.149851	0.33634	0.599993	0.894281	1.15751	1.34002	1.43262	1.48541	1.51333	1.54624	1.59981	1.65566	1.69456	1.71625
0.0457761	-0.0453395	-0.188212	-0.376984	-0.590308	-0.812607	-0.988507	-1.08568	-1.09864	-1.02101	-0.888933	-0.769144	-0.713191	-0.754927	-0.861956	-0.959383	-1.03561	-1.07946	-1.08213	-1.01397	-0.872144	-0.650752	-0.415659	-0.239903	-0.173544	-0.253482	-0.462513	-0.754279	-1.0803	-1.37644	-1.58801	-1.7022	-1.7231	-1.70159	-1.72944	-1.84699	-2.00269	-2.12638	-2.14643	-2.0799	-1.98895	-1.92385	-1.87	-1.80493	-1.72205	-1.60149	-1.46224	-1.31375	-1.20621	-1.14109
-0.124964	-0.0870202	-0.055773	-0.019276	0.0153516	0.0205378	-0.0291282	-0.131919	-0.268518	-0.418321	-0.564843	-0.689926	-0.782072	-0.851484	-0.896341	-0.934475	-0.973725	-1.0317	-1.1002	-1.17814	-1.21446	-1.16359	-1.01101	-0.796829	-0.605974	-0.484186	-0.438688	-0.439939	-0.473751	-0.53494	-0.621156	-0.746354	-0.897021	-1.05179	-1.18064	-1.27474	-1.32843	-1.35115	-1.35381	-1.33338	-1.29076	-1.22021	-1.12661	-1.03272	-0.968694	-0.952321	-0.963945	-0.962182	-0.922338	-0.83521
0.931086	0.911402	0.881632	0.847146	0.811234	0.769392	0.715262	0.631726	0.510101	0.353697	0.178843	0.0104312	-0.113285	-0.175691	-0.187307	-0.164276	-0.155733	-0.170375	-0.20286	-0.221359	-0.215587	-0.193743	-0.183252	-0.200028	-0.243116	-0.301043	-0.358415	-0.412294	-0.442883	-0.444239	-0.404261	-0.335369	-0.261698	-0.206011	-0.184866	-0.192542	-0.215176	-0.24538	-0.267331	-0.264617	-0.237434	-0.195208	-0.140374	-0.0770886	0.00107499	0.086109	0.16785	0.233859	0.277977	0.301859
-0.434251	-0.402759	-0.319996	-0.199135	-0.0615037	0.0460501	0.0855939	0.075033	0.0256406	-0.0240248	-0.0528318	-0.0505839	-0.0268735	-0.0066577	-0.00892357	-0.0459448	-0.093702	-0.105291	0.011529	0.330505	0.854017	1.51855	2.18045	2.67744	2.86051	2.67983	2.24146	1.75211	1.40311	1.24724	1.24063	1.28277	1.29634	1.28394	1.2799	1.28702	1.28623	1.25139	1.18158	1.12498	1.10607	1.13574	1.1935	1.27269	1.34075	1.37847	1.38735	1.39475	1.41727	1.4561
0.867459	0.866207	0.871534	0.867066	0.856879	0.831193	0.783138	0.697429	0.586224	0.468126	0.361843	0.287594	0.264248	0.275773	0.303333	0.333274	0.363917	0.355889	0.275011	0.149151	0.0309897	-0.0480787	-0.0968411	-0.135007	-0.170081	-0.21097	-0.268894	-0.321859	-0.343373	-0.299551	-0.207225	-0.0905307	0.0299198	0.133541	0.224072	0.302312	0.368946	0.425777	0.485667	0.558731	0.631981	0.710314	0.767077	0.782905	0.764499	0.732344	0.717136	0.717106	0.714932	0.688789
0.738808	0.814603	0.878845	0.953667	1.01865	1.07496	1.10733	1.09444	1.05786	0.990667	0.957734	0.952672	1.01156	1.12047	1.26325	1.35358	1.39926	1.40337	1.41633	1.46715	1.5294	1.55422	1.50976	1.38544	1.23143	1.10643	0.987432	0.895035	0.814349	0.754028	0.711662	0.684299	0.649986	0.626888	0.613195	0.619083	0.609843	0.591651	0.533264	0.450298	0.307681	0.148621	-0.0262131	-0.20439	-0.352129	-0.4445	-0.428417	-0.32969	-0.157965	0.0661011
0.606876	0.441851	0.33932	0.331616	0.401031	0.521108	0.632384	0.76837	0.88981	0.985379	1.0762	1.14192	1.14843	1.13894	1.13639	1.14152	1.11168	1.04929	0.91373	0.709401	0.398956	0.022211	-0.381496	-0.771041	-1.1463	-1.48893	-1.80714	-2.10519	-2.34231	-2.41576	-2.29179	-1.98216	-1.53133	-1.04825	-0.619211	-0.242406	0.0724611	0.342852	0.626987	0.882669	1.08834	1.25588	1.34712	1.41871	1.43534	1.43056	1.43665	1.48852	1.55575	1.63387
-1.69068	-1.60222	-1.48728	-1.28515	-1.02382	-0.712023	-0.418337	-0.183882	-0.0557057	-0.0412807	-0.0823034	-0.117468	-0.12269	-0.108007	-0.109505	-0.143997	-0.201995	-0.28031	-0.346412	-0.367319	-0.337147	-0.297212	-0.278906	-0.310516	-0.383475	-0.497744	-0.64455	-0.836408	-1.09685	-1.38534	-1.60955	-1.72373	-1.74782	-1.74784	-1.81862	-1.99376	-2.21126	-2.35627	-2.37381	-2.29146	-2.14357	-1.94336	-1.7257	-1.55146	-1.44884	-1.44566	-1.46179	-1.47666	-1.4528	-1.4544
1.2226	1.25831	1.30503	1.36726	1.42382	1.4773	1.5139	1.53377	1.54203	1.5493	1.5618	1.56901	1.57491	1.57915	1.58644	1.59729	1.60613	1.61053	1.61046	1.59853	1.58031	1.56316	1.55299	1.54899	1.55716	1.55392	1.53479	1.49071	1.41957	1.32822	1.24393	1.16754	1.10372	1.06063	1.04853	1.06115	1.0807	1.09646	1.10126	1.10009	1.08986	1.08395	1.07942	1.08188	1.10377	1.13137	1.15243	1.14325	1.10838	1.06253
0.302535	0.731665	1.21551	1.68897	2.0444	2.18251	2.10772	1.87142	1.59779	1.39465	1.26702	1.22122	1.16989	1.09745	1.00551	0.894002	0.795706	0.719329	0.716035	0.755589	0.825596	0.86403	0.820447	0.675359	0.456329	0.25938	0.10537	0.0181437	0.0023886	0.0438263	0.117132	0.201423	0.271294	0.302009	0.278291	0.184874	0.0551904	-0.0767132	-0.172808	-0.187768	-0.117108	0.0137512	0.164159	0.289208	0.382363	0.452791	0.48266	0.469642	0.403512	0.317654
-2.48965	-2.444	-2.43946	-2.45799	-2.48745	-2.4825	-2.38302	-2.16388	-1.85633	-1.54267	-1.31396	-1.20667	-1.2095	-1.2832	-1.35838	-1.41841	-1.46267	-1.50671	-1.54358	-1.5815	-1.61043	-1.63501	-1.63061	-1.58458	-1.49459	-1.35929	-1.19873	-1.032	-0.880307	-0.757809	-0.653162	-0.531182	-0.33535	-0.0869332	0.174574	0.367521	0.437907	0.415394	0.352472	0.355372	0.475418	0.698059	0.999172	1.31393	1.5675	1.73339	1.82048	1.86569	1.9023	1.92292
-1.22226	-1.39753	-1.63697	-1.91002	-2.19528	-2.44595	-2.64525	-2.75918	-2.75456	-2.61623	-2.38933	-2.1757	-2.06123	-2.08563	-2.19857	-2.32721	-2.43337	-2.48585	-2.46445	-2.32922	-2.06656	-1.68751	-1.21995	-0.767652	-0.408516	-0.181998	-0.0608911	-0.0418102	-0.109472	-0.239846	-0.387538	-0.522869	-0.64962	-0.766984	-0.867046	-0.919591	-0.910586	-0.81547	-0.67121	-0.538952	-0.494946	-0.536445	-0.613425	-0.652419	-0.603072	-0.475073	-0.294517	-0.117181	0.0386373	0.159825
0.488717	0.46175	0.456715	0.441526	0.436235	0.429257	0.41586	0.415063	0.434372	0.48152	0.519098	0.516348	0.458802	0.374467	0.27769	0.160273	-0.0433749	-0.363028	-0.807731	-1.31329	-1.79601	-2.19243	-2.50381	-2.75728	-2.99215	-3.22449	-3.4085	-3.54219	-3.58077	-3.50609	-3.27677	-2.86079	-2.25803	-1.53649	-0.810513	-0.184005	0.274455	0.587404	0.751732	0.804519	0.774242	0.674865	0.534915	0.398139	0.294785	0.237503	0.232973	0.26188	0.300651	0.345291
-0.842148	-0.806019	-0.736998	-0.630177	-0.499486	-0.38277	-0.333503	-0.395187	-0.589367	-0.926513	-1.39154	-1.91077	-2.36129	-2.58152	-2.52007	-2.24346	-1.94358	-1.7996	-1.87286	-2.08504	-2.29616	-2.41829	-2.46894	-2.47326	-2.49283	-2.56629	-2.68661	-2.8386	-2.99496	-3.12246	-3.20435	-3.175	-3.01216	-2.69678	-2.24545	-1.78254	-1.45284	-1.29343	-1.25387	-1.2672	-1.24457	-1.16008	-1.02877	-0.846834	-0.641732	-0.433106	-0.261242	-0.123354	-0.00909737	0.0915098
-1.48298	-1.48577	-1.44938	-1.37057	-1.25522	-1.12875	-1.00303	-0.870099	-0.729736	-0.58783	-0.469003	-0.379466	-0.314856	-0.265132	-0.254562	-0.28805	-0.361165	-0.43267	-0.444413	-0.352643	-0.166914	0.0747712	0.312061	0.491338	0.593371	0.621927	0.601651	0.565344	0.543791	0.573284	0.669388	0.853441	1.10217	1.37192	1.61974	1.82395	1.97777	2.08042	2.16386	2.23654	2.30427	2.35849	2.39327	2.41029	2.40046	2.37304	2.3224	2.24134	2.10638	1.90211
-0.10309	-0.159671	-0.233016	-0.312096	-0.401308	-0.480472	-0.546649	-0.598496	-0.642628	-0.690701	-0.719059	-0.706746	-0.62641	-0.474813	-0.29206	-0.142264	-0.0590606	-0.0460994	-0.0684544	-0.08681	-0.0708438	0.0162278	0.195622	0.48439	0.858336	1.27124	1.66314	1.9976	2.23198	2.37345	2.40349	2.33142	2.17875	1.9772	1.76804	1.57795	1.42793	1.33294	1.2879	1.2894	1.33472	1.40298	1.46958	1.51298	1.5268	1.52531	1.512	1.49621	1.46608	1.42329
-1.19786	-1.14894	-1.06751	-0.942049	-0.790126	-0.628486	-0.518124	-0.497211	-0.512706	-0.51346	-0.507621	-0.510535	-0.566574	-0.658839	-0.742318	-0.768283	-0.714494	-0.617683	-0.49437	-0.373809	-0.293408	-0.282788	-0.325718	-0.384475	-0.440758	-0.460918	-0.424795	-0.377511	-0.367657	-0.397055	-0.451894	-0.528852	-0.61626	-0.708046	-0.795408	-0.842786	-0.843501	-0.762171	-0.635018	-0.50066	-0.379937	-0.218146	0.00121023	0.271022	0.511335	0.67224	0.760475	0.801674	0.825674	0.834374
-0.519453	-0.455813	-0.375081	-0.286966	-0.192399	-0.112173	-0.053016	-0.0179226	-0.00883452	-0.011507	-0.00868105	0.0287692	0.107321	0.215617	0.327974	0.422519	0.48645	0.521247	0.551704	0.589197	0.642006	0.707441	0.770055	0.80973	0.814213	0.744989	0.581654	0.309089	-0.0426357	-0.396739	-0.695671	-0.898512	-1.01457	-1.07029	-1.08731	-1.08276	-1.08603	-1.11919	-1.17795	-1.22445	-1.21306	-1.13069	-0.992393	-0.843976	-0.710447	-0.608396	-0.544004	-0.501711	-0.47799	-0.455018
-0.406407	-0.674855	-0.957295	-1.13827	-1.15786	-1.04194	-0.918336	-0.963885	-1.18041	-1.42882	-1.53079	-1.40564	-1.14514	-0.933414	-0.82728	-0.792172	-0.728077	-0.619301	-0.516564	-0.431603	-0.366413	-0.323583	-0.320891	-0.355697	-0.429405	-0.518511	-0.61355	-0.704683	-0.798706	-0.906428	-1.03688	-1.14333	-1.17692	-1.15942	-1.12938	-1.11627	-1.1106	-1.10632	-1.12681	-1.15536	-1.17098	-1.17421	-1.15482	-1.1336	-1.12558	-1.13115	-1.12023	-1.09173	-1.05567	-1.03147
-1.11265	-0.842778	-0.596342	-0.458498	-0.493098	-0.695195	-0.889383	-0.938904	-0.720534	-0.258108	0.31176	0.883465	1.33007	1.60714	1.6446	1.48561	1.15772	0.794826	0.446375	0.166471	-0.0181781	-0.101867	-0.0225035	0.221295	0.519063	0.711613	0.671077	0.45983	0.228825	0.0720606	0.0718132	0.138076	0.0823312	-0.116498	-0.368752	-0.518023	-0.50428	-0.392166	-0.234161	-0.0652809	0.122684	0.32082	0.540584	0.755338	0.957576	1.1042	1.17134	1.12593	0.992399	0.815599
0.580806	0.543281	0.522408	0.548463	0.600315	0.660683	0.727456	0.807704	0.897947	0.998736	1.0777	1.11358	1.10917	1.08638	1.07607	1.08457	1.08361	1.02531	0.84815	0.512978	0.0626329	-0.405729	-0.80348	-1.08814	-1.28534	-1.41297	-1.50524	-1.55432	-1.57334	-1.59487	-1.67461	-1.80324	-1.94017	-2.05171	-2.10797	-2.1229	-2.11169	-2.07344	-1.99505	-1.87056	-1.69135	-1.49899	-1.29777	-1.10158	-0.919912	-0.764083	-0.663073	-0.602264	-0.576876	-0.574341
0.259967	0.249454	0.236361	0.228907	0.192819	0.123267	0.0377707	-0.040655	-0.0699361	-0.0338119	0.0401448	0.140408	0.240665	0.329319	0.409434	0.46183	0.503248	0.536783	0.561675	0.5828	0.608963	0.636731	0.666242	0.694817	0.708305	0.68568	0.597747	0.437018	0.193597	-0.11737	-0.468298	-0.810463	-1.10229	-1.34956	-1.52809	-1.63696	-1.71909	-1.78258	-1.81569	-1.78067	-1.67663	-1.53706	-1.40664	-1.30822	-1.25104	-1.21006	-1.17811	-1.17237	-1.18472	-1.21748
-0.742321	-0.84881	-0.989125	-1.14529	-1.27114	-1.31501	-1.24265	-1.07914	-0.842962	-0.564357	-0.247633	0.0963219	0.433218	0.736536	0.953967	1.0669	1.05863	0.921265	0.704072	0.45141	0.23514	0.0477763	-0.0962329	-0.180396	-0.113256	0.145196	0.514292	0.94378	1.21516	1.19749	0.914785	0.516126	0.180232	-0.0266545	-0.109767	-0.0931175	-0.021606	0.0639252	0.12555	0.147614	0.113985	0.0526029	0.00195601	0.00780394	0.081449	0.211821	0.34295	0.401681	0.361735	0.23938
-0.219568	-0.188826	-0.154345	-0.161799	-0.18951	-0.22719	-0.246682	-0.219615	-0.151393	-0.10094	-0.120512	-0.247438	-0.456946	-0.678092	-0.834451	-0.907014	-0.914245	-0.895811	-0.880292	-0.882746	-0.8832	-0.869672	-0.859419	-0.868004	-0.885362	-0.890605	-0.878141	-0.858759	-0.838182	-0.841196	-0.812382	-0.725335	-0.577866	-0.399944	-0.250143	-0.16736	-0.132119	-0.0812712	-0.0102241	0.0578103	0.109627	0.143079	0.197851	0.273602	0.331089	0.366481	0.393144	0.450774	0.551758	0.654114
-1.59175	-1.60339	-1.66852	-1.74005	-1.78225	-1.77448	-1.7121	-1.63562	-1.57031	-1.54893	-1.55438	-1.5466	-1.54757	-1.54811	-1.56897	-1.59968	-1.63922	-1.68473	-1.75122	-1.80649	-1.85741	-1.90312	-1.92609	-1.92724	-1.89709	-1.84152	-1.79011	-1.76398	-1.78986	-1.87237	-1.99505	-2.12818	-2.26644	-2.41517	-2.54759	-2.62702	-2.66912	-2.70312	-2.76026	-2.80306	-2.78601	-2.65037	-2.39807	-2.10046	-1.82439	-1.63794	-1.48869	-1.35346	-1.24856	-1.19975
-1.45203	-1.26211	-1.10779	-1.01474	-1.01666	-1.0343	-1.04219	-0.999868	-0.918157	-0.836623	-0.739104	-0.604664	-0.424508	-0.217314	-0.0530573	0.0529235	0.09843	0.0794691	-0.0169171	-0.184152	-0.476143	-0.796408	-0.991131	-0.938576	-0.611664	-0.168996	0.209189	0.42617	0.497851	0.447874	0.395672	0.35142	0.390173	0.436074	0.473556	0.479932	0.446428	0.425309	0.45894	0.511885	0.624058	0.691082	0.621903	0.405593	0.00380935	-0.367326	-0.627323	-0.680322	-0.607207	-0.461266
-0.459066	-0.525201	-0.665164	-0.782642	-0.865278	-0.898817	-0.829773	-0.645906	-0.413609	-0.214623	-0.120914	-0.169459	-0.369383	-0.723105	-1.06715	-1.26953	-1.28377	-1.15028	-0.964155	-0.812503	-0.720676	-0.657826	-0.606911	-0.571705	-0.524069	-0.46412	-0.386112	-0.333938	-0.323449	-0.32988	-0.334039	-0.338394	-0.330334	-0.31307	-0.314127	-0.31182	-0.353069	-0.399779	-0.468105	-0.480348	-0.461398	-0.426728	-0.368212	-0.337999	-0.320275	-0.348028	-0.386016	-0.460789	-0.589903	-0.75055
0.258407	0.116416	-0.0146987	-0.0548072	-0.00397403	0.0717417	0.0813237	-0.0262562	-0.206057	-0.366641	-0.405604	-0.308262	-0.0997939	0.0886501	0.246446	0.30918	0.277362	0.154651	0.00578372	-0.117542	-0.173357	-0.164772	-0.152207	-0.195921	-0.254188	-0.293143	-0.293069	-0.229183	-0.197473	-0.190124	-0.274704	-0.446362	-0.625739	-0.706165	-0.630006	-0.448187	-0.236275	-0.0815643	-0.0435575	-0.0992196	-0.129613	-0.0467511	0.146042	0.391848	0.617769	0.704119	0.685152	0.518886	0.271912	0.0509679
-1.03603	-0.847489	-0.670395	-0.389421	-0.051758	0.260541	0.475231	0.575133	0.568642	0.463184	0.350196	0.239151	0.183063	0.18443	0.258352	0.376015	0.580122	0.785369	0.942735	0.935394	0.836848	0.654504	0.483852	0.363613	0.269237	0.199913	0.134313	0.103571	0.125621	0.241335	0.402214	0.563515	0.637874	0.656485	0.608065	0.54936	0.462376	0.387984	0.353551	0.329765	0.365655	0.416125	0.464071	0.552372	0.648083	0.685228	0.605761	0.491204	0.402942	0.351533
0.293967	0.32076	0.404367	0.511803	0.658152	0.774437	0.820034	0.730209	0.558718	0.364792	0.215404	0.167008	0.206901	0.271986	0.351404	0.42159	0.454918	0.415072	0.296108	0.122724	-0.0139633	-0.03022	0.0711241	0.235908	0.382004	0.416744	0.318101	0.131425	-0.0588519	-0.111131	-0.025202	0.185552	0.409368	0.609077	0.759298	0.850154	0.857168	0.798416	0.726516	0.608188	0.529273	0.517826	0.581587	0.660759	0.747074	0.79917	0.806968	0.799049	0.78862	0.805253
0.996422	0.712582	0.435967	0.216375	0.0538828	-0.00859312	-0.0155277	0.07665	0.227598	0.397576	0.530531	0.540501	0.388935	0.16028	-0.0325405	-0.167312	-0.189972	-0.128958	-0.0742581	-0.02246	-0.0517783	-0.100506	-0.09054	-0.0374191	0.0562596	0.178697	0.296128	0.382491	0.427728	0.360261	0.228314	0.130768	0.155446	0.265896	0.474505	0.627756	0.735634	0.752692	0.67164	0.585166	0.459219	0.326504	0.249086	0.332834	0.519678	0.72818	0.949405	1.0259	0.927879	0.754899
1.38203	1.3029	1.20191	1.06351	0.919057	0.747838	0.56746	0.390701	0.152148	-0.136849	-0.42342	-0.668964	-0.792585	-0.779206	-0.62702	-0.363433	-0.0911319	0.151341	0.296777	0.334358	0.268611	0.143148	0.0554804	0.0233417	0.0582198	0.122656	0.210925	0.274811	0.29619	0.308945	0.323937	0.285509	0.233457	0.163419	0.107512	-0.00781274	-0.200797	-0.45532	-0.725188	-0.905604	-0.948208	-0.834039	-0.682335	-0.603021	-0.652975	-0.764181	-0.797062	-0.765963	-0.707265	-0.663218
-0.251226	-0.191503	-0.17898	-0.199708	-0.201011	-0.147208	-0.0865337	-0.0818576	-0.140636	-0.333882	-0.543675	-0.659369	-0.681383	-0.597862	-0.515714	-0.501273	-0.568687	-0.732981	-0.941414	-1.08997	-1.13021	-1.07131	-0.923879	-0.727275	-0.45418	-0.239446	-0.0844013	-0.0179406	-0.00393429	-0.0554111	-0.105624	-0.159433	-0.197258	-0.22277	-0.245623	-0.248781	-0.2752	-0.2615	-0.214489	-0.162322	-0.137818	-0.106331	-0.0421241	0.0488574	0.188436	0.320527	0.380954	0.341495	0.256539	0.146608
-0.755754	-0.573885	-0.350908	-0.171841	-0.104471	-0.152747	-0.247809	-0.268837	-0.17685	0.0174685	0.234606	0.475489	0.669779	0.815505	0.866554	0.853446	0.790318	0.663268	0.491008	0.29687	0.1261	0.00978073	-0.0306328	-0.00867731	0.111791	0.244246	0.40487	0.515168	0.546828	0.528299	0.57037	0.685025	0.854561	1.03135	1.12984	1.13737	1.02415	0.869247	0.762253	0.702955	0.625608	0.53721	0.419311	0.3631	0.359656	0.433083	0.490237	0.566557	0.539233	0.414447
0.416666	0.506101	0.541787	0.539256	0.472168	0.405576	0.340317	0.288909	0.298771	0.366999	0.453326	0.507543	0.466582	0.382145	0.282119	0.218512	0.200115	0.204805	0.273369	0.37936	0.442485	0.452509	0.449725	0.355553	0.239761	0.134241	0.0617473	0.0285438	0.00729221	0.00989197	0.0384116	0.0863679	0.127591	0.0988246	-0.0152193	-0.143442	-0.229434	-0.25114	-0.225385	-0.19019	-0.163419	-0.195523	-0.287684	-0.417916	-0.501613	-0.583396	-0.637609	-0.675063	-0.626925	-0.541231
0.852849	0.775946	0.757905	0.743347	0.725521	0.751887	0.816883	0.949593	1.07082	1.16338	1.20033	1.16363	1.0842	1.0486	1.03714	0.972619	0.786338	0.499377	0.261527	0.197111	0.352977	0.59773	0.808536	0.913743	0.929265	0.929939	0.979888	1.08085	1.13351	1.12618	0.990806	0.772335	0.529019	0.310693	0.155929	0.0753743	0.10286	0.174899	0.15267	0.0430284	-0.189975	-0.436713	-0.629408	-0.667466	-0.560245	-0.359885	-0.119873	0.07074	0.182781	0.206717
-0.143565	0.0231854	0.193664	0.327473	0.38847	0.400425	0.385996	0.375645	0.408525	0.528306	0.665394	0.857601	0.997668	1.07774	1.05457	0.980105	0.923145	0.929366	1.02717	1.14021	1.24337	1.21202	1.08873	0.854919	0.6301	0.468228	0.34191	0.255661	0.170986	0.142792	0.18793	0.261888	0.317553	0.332695	0.308023	0.29935	0.3413	0.473797	0.65109	0.751281	0.737137	0.603231	0.440908	0.298332	0.195502	0.12605	0.0684553	0.00281021	-0.0398987	-0.0630462
-0.162701	-0.0462707	0.199274	0.52179	0.881181	1.20782	1.40549	1.4059	1.12274	0.709099	0.267504	0.0362763	0.0423053	0.246427	0.510584	0.692827	0.77681	0.729273	0.60795	0.501002	0.435964	0.484686	0.618382	0.740633	0.806548	0.725308	0.565384	0.355771	0.163134	0.0314367	-0.0102581	0.0179199	0.103773	0.199906	0.268452	0.298748	0.291867	0.303743	0.293894	0.31202	0.32529	0.36353	0.412004	0.434153	0.355366	0.154547	-0.122653	-0.371815	-0.574375	-0.770145
0.584603	0.672403	0.707268	0.666572	0.522981	0.386095	0.271094	0.274621	0.368911	0.493819	0.551515	0.491172	0.295849	0.055929	-0.138162	-0.197986	-0.216304	-0.237683	-0.265692	-0.268726	-0.208269	-0.0811885	0.0674232	0.175064	0.243382	0.315657	0.410078	0.470868	0.50283	0.547811	0.571251	0.547577	0.432734	0.2628	0.073744	-0.0544798	-0.138992	-0.106406	-0.0706202	-0.0546285	-0.0788022	-0.106813	-0.0902739	-0.030917	0.0259053	0.0219009	-0.045708	-0.110257	-0.202533	-0.314551
-0.236885	-0.222958	-0.264356	-0.344073	-0.417459	-0.462757	-0.468216	-0.42852	-0.326096	-0.200112	-0.088526	-0.0454841	0.0341235	0.148847	0.254359	0.252183	0.102242	-0.130141	-0.414363	-0.648944	-0.820572	-0.91925	-0.960721	-0.887488	-0.758888	-0.608349	-0.482867	-0.352222	-0.235005	-0.197255	-0.182373	-0.203276	-0.206847	-0.215748	-0.231067	-0.288659	-0.398598	-0.499864	-0.568241	-0.60793	-0.552085	-0.44102	-0.307695	-0.184965	-0.186756	-0.268635	-0.427304	-0.612791	-0.67473	-0.668528
0.480732	0.748068	0.990719	1.14946	1.2022	1.17764	1.05372	0.822286	0.521793	0.252584	0.147467	0.206709	0.345824	0.444894	0.419325	0.308145	0.208424	0.123274	0.00335152	-0.121139	-0.252602	-0.341858	-0.358003	-0.258856	-0.0252046	0.265924	0.470885	0.547885	0.48571	0.333153	0.145309	0.00706015	-0.0491921	0.0406654	0.173237	0.323394	0.345821	0.205324	-0.0355649	-0.295964	-0.539434	-0.720123	-0.753717	-0.628986	-0.422485	-0.234723	-0.21983	-0.361165	-0.558989	-0.675067
-0.48253	-0.449946	-0.366631	-0.253171	-0.124324	-0.0316185	-0.0218873	-0.0423257	-0.0570967	-0.0301249	0.0407595	0.11983	0.209454	0.353812	0.514389	0.646041	0.703974	0.66404	0.547579	0.365256	0.200298	0.0948395	0.154031	0.290534	0.473246	0.581639	0.510675	0.341215	0.165094	0.0499935	0.0219461	0.0528309	0.172792	0.357362	0.564027	0.662888	0.639227	0.536366	0.420539	0.310799	0.224834	0.16154	0.089598	0.0100705	-0.0812867	-0.174287	-0.320039	-0.491655	-0.674839	-0.817075
-0.958801	-0.805418	-0.59349	-0.342417	-0.0554449	0.253794	0.495746	0.550841	0.451272	0.300266	0.139117	0.117387	0.204765	0.386962	0.543603	0.610906	0.591344	0.540128	0.477454	0.411755	0.350959	0.27684	0.173789	0.0477218	-0.10634	-0.204569	-0.253272	-0.152146	0.0915038	0.393627	0.672369	0.862021	0.845488	0.65027	0.397557	0.188166	0.154227	0.323658	0.507995	0.640314	0.704186	0.695098	0.731319	0.776464	0.802082	0.715543	0.497788	0.248167	0.0623156	-0.0601656
-0.714837	-0.600393	-0.466867	-0.267171	-0.16611	-0.150363	-0.251453	-0.378607	-0.44057	-0.444994	-0.447934	-0.457555	-0.468302	-0.565753	-0.695948	-0.845557	-0.937955	-0.948703	-0.876217	-0.688124	-0.485646	-0.324831	-0.176221	-0.069779	0.0230364	0.123192	0.226985	0.282116	0.256054	0.214271	0.247922	0.323645	0.393026	0.425031	0.342352	0.183481	0.0364162	-0.108055	-0.269919	-0.427108	-0.567806	-0.669551	-0.761767	-0.836389	-0.868508	-0.803411	-0.653911	-0.399143	-0.101981	0.143058
0.19952	0.287389	0.368194	0.441105	0.505296	0.54655	0.535613	0.437812	0.304936	0.211648	0.191825	0.227783	0.26371	0.298634	0.34501	0.426577	0.592309	0.799913	1.0361	1.18925	1.21058	1.14149	1.00515	0.786324	0.566109	0.289788	0.0310878	-0.161621	-0.252595	-0.21187	-0.0869921	0.0834982	0.260002	0.369353	0.349101	0.150632	-0.137197	-0.314968	-0.249246	0.0798829	0.48141	0.687925	0.591512	0.336234	0.0782438	-0.0325205	0.0013836	0.0748225	0.0766893	-0.0764023
-0.240945	-0.244291	-0.242157	-0.179289	-0.127516	-0.0827591	-0.0609233	-0.0674697	-0.118773	-0.152348	-0.168646	-0.219544	-0.29211	-0.430855	-0.530706	-0.567666	-0.509019	-0.426404	-0.372826	-0.372635	-0.33567	-0.192336	0.024779	0.243434	0.396679	0.393952	0.270526	0.0848085	-0.0985513	-0.305262	-0.461922	-0.601171	-0.694632	-0.674027	-0.559217	-0.411691	-0.311239	-0.273574	-0.251943	-0.278022	-0.415582	-0.640981	-0.89368	-1.05311	-1.08994	-0.99232	-0.803502	-0.633823	-0.557118	-0.483059
-0.889111	-0.844215	-0.795577	-0.727116	-0.618322	-0.389436	-0.0974444	0.175692	0.349157	0.389639	0.304799	0.113144	-0.0674503	-0.226899	-0.361989	-0.418396	-0.36663	-0.210237	0.0402233	0.24885	0.372483	0.371224	0.269676	0.186527	0.157666	0.203552	0.275551	0.354253	0.42506	0.569508	0.727261	0.921641	1.13468	1.21846	1.10856	0.90043	0.714912	0.599797	0.590724	0.571684	0.575781	0.573831	0.471645	0.317768	0.196281	0.0838796	-0.0174165	-0.0829071	-0.104584	-0.152041
0.746266	0.778035	0.775442	0.80448	0.735541	0.584739	0.353051	0.09879	-0.0817559	-0.119643	-0.068568	0.0422452	0.162669	0.303778	0.417415	0.514775	0.526433	0.469482	0.315681	0.111115	-0.0943293	-0.235918	-0.304091	-0.387017	-0.499733	-0.67822	-0.821043	-0.855366	-0.704873	-0.489916	-0.338336	-0.196308	-0.124609	-0.134755	-0.200531	-0.276905	-0.306406	-0.304524	-0.343456	-0.371604	-0.407526	-0.419737	-0.361621	-0.256781	-0.135641	-0.0929273	-0.2186	-0.437047	-0.622634	-0.702455
-0.356432	-0.350715	-0.317196	-0.215187	-0.100768	0.0455806	0.131809	0.162973	0.158723	0.128643	0.102695	0.0831568	0.10799	0.129952	0.105787	-0.0164799	-0.28743	-0.629831	-0.89662	-1.01205	-0.97406	-0.816669	-0.629907	-0.466006	-0.352837	-0.335901	-0.290992	-0.167419	-0.00749766	0.131639	0.154795	0.0279516	-0.145979	-0.253963	-0.233306	-0.113142	-0.0787705	-0.17901	-0.317319	-0.444221	-0.531587	-0.568167	-0.518475	-0.444776	-0.326291	-0.203129	-0.0590277	0.0665796	0.146035	0.203196
-0.0671298	-0.105116	-0.158959	-0.197023	-0.243898	-0.308548	-0.362525	-0.316817	-0.181925	0.00801475	0.195837	0.256752	0.175848	0.0189995	-0.0761139	-0.0870077	-0.0307536	0.102521	0.238639	0.423748	0.566103	0.632441	0.593129	0.407624	0.121753	-0.184381	-0.380965	-0.447857	-0.364447	-0.295425	-0.312204	-0.479732	-0.72809	-0.950552	-1.15626	-1.26569	-1.2995	-1.28116	-1.22655	-1.12549	-0.982505	-0.837134	-0.693669	-0.562462	-0.473794	-0.395313	-0.338339	-0.288503	-0.218211	-0.110634
0.401993	0.401532	0.345365	0.177964	-0.0518145	-0.246896	-0.341019	-0.305405	-0.166475	-0.0614773	-0.0442487	-0.122444	-0.17941	-0.207993	-0.17208	-0.0942091	-0.0122391	0.0783452	0.152621	0.258919	0.381083	0.476832	0.48814	0.444151	0.392772	0.344038	0.312347	0.265774	0.193281	0.0870812	-0.0190919	-0.104964	-0.0857689	0.0125419	0.102223	0.133897	0.0451971	-0.0926956	-0.160571	-0.130823	0.015541	0.223432	0.348921	0.371324	0.340835	0.26478	0.151775	0.0176797	-0.129518	-0.222448
0.0526669	0.1314	0.243395	0.331873	0.459626	0.53036	0.504452	0.426227	0.306897	0.20056	0.181397	0.216029	0.336779	0.475484	0.560017	0.524017	0.411818	0.331497	0.341287	0.437664	0.512676	0.488504	0.336267	0.120248	-0.0114226	-0.0100597	0.074461	0.19922	0.313988	0.370786	0.332435	0.114399	-0.177671	-0.46346	-0.618791	-0.570909	-0.373714	-0.0733561	0.13537	0.259666	0.299727	0.35194	0.367199	0.413078	0.48973	0.551564	0.584803	0.451343	0.163183	-0.12184
0.352285	0.143672	-0.00293113	-0.0803616	-0.0932233	-0.0656652	-0.0440563	-0.0179618	0.00829537	-0.0206774	-0.0210743	-0.00408052	0.0258652	0.0517989	0.0773972	0.109503	0.117493	0.117241	0.113148	0.132913	0.168714	0.212909	0.245277	0.251542	0.196354	0.107667	0.0705434	0.0965671	0.181908	0.272516	0.314474	0.302978	0.217296	0.122579	0.059924	0.118651	0.237776	0.360247	0.39803	0.373055	0.36654	0.403415	0.494182	0.595518	0.636494	0.624145	0.597763	0.558519	0.556554	0.530462
-0.279654	-0.392777	-0.428353	-0.428326	-0.340336	-0.225516	-0.0528547	0.0936152	0.214231	0.264306	0.194357	0.0013785	-0.368302	-0.708994	-0.885744	-0.77222	-0.474961	-0.0612147	0.266176	0.404306	0.385434	0.198678	-0.0350796	-0.268185	-0.372579	-0.423444	-0.500117	-0.63808	-0.79758	-0.857161	-0.762764	-0.518464	-0.189309	0.108769	0.404473	0.667428	0.809792	0.769362	0.591357	0.330211	0.108181	-0.0355078	-0.120408	-0.176346	-0.233147	-0.25744	-0.280888	-0.311606	-0.339117	-0.335185
0.452619	0.383917	0.212056	-0.00766025	-0.178973	-0.239335	-0.203283	-0.199979	-0.297161	-0.476882	-0.774823	-1.00705	-1.09329	-0.965583	-0.651596	-0.205895	0.226875	0.485525	0.500225	0.375728	0.202471	0.0451663	-0.0575871	-0.138673	-0.212054	-0.269024	-0.350508	-0.394203	-0.424613	-0.462724	-0.517714	-0.558359	-0.514257	-0.408582	-0.273259	-0.137865	-0.126576	-0.243206	-0.471093	-0.68568	-0.828899	-0.843068	-0.781578	-0.56489	-0.249194	0.0853913	0.420899	0.632769	0.599589	0.378024
0.289371	0.3382	0.399789	0.493107	0.584248	0.630003	0.629728	0.524834	0.385078	0.223988	0.0953998	-0.0109117	-0.069984	-0.13164	-0.148049	-0.140512	-0.10681	-0.0337191	0.0354997	0.0105077	-0.158698	-0.386187	-0.535677	-0.509194	-0.346688	-0.122846	0.0330663	0.0613635	0.00387039	-0.0486431	-0.104331	-0.195219	-0.343975	-0.490575	-0.553085	-0.577383	-0.56142	-0.558906	-0.550427	-0.472839	-0.386747	-0.299133	-0.268764	-0.25073	-0.298124	-0.367234	-0.502942	-0.648062	-0.81122	-0.940526
0.395505	0.382408	0.388994	0.462393	0.558528	0.674041	0.743538	0.738739	0.716348	0.757019	0.913756	1.15417	1.31959	1.3276	1.18008	0.949	0.723951	0.536318	0.412786	0.392541	0.453221	0.598202	0.715723	0.697503	0.60178	0.435689	0.290621	0.189019	0.138092	0.21881	0.313126	0.395999	0.453454	0.410478	0.337706	0.305966	0.354488	0.466113	0.549449	0.537846	0.467348	0.412239	0.395659	0.452113	0.454798	0.364357	0.19781	0.0459503	-0.040801	-0.0288674
0.437004	0.556744	0.644447	0.643535	0.542708	0.315467	0.0665735	-0.163317	-0.332512	-0.359594	-0.209065	0.0294838	0.252686	0.399698	0.48457	0.528393	0.570886	0.571007	0.458682	0.299048	0.187313	0.199633	0.261564	0.277988	0.229062	0.107357	0.0320406	-0.00251323	0.0993276	0.275953	0.502342	0.608363	0.576341	0.414862	0.242153	0.166059	0.196448	0.242612	0.197916	0.0633803	-0.113502	-0.215514	-0.19099	-0.116295	-0.0850046	-0.171762	-0.360324	-0.555417	-0.716926	-0.836316
-0.764902	-0.584152	-0.365541	-0.145426	0.0910158	0.344991	0.571174	0.732984	0.784439	0.718076	0.550333	0.368115	0.285369	0.259523	0.326711	0.387025	0.421885	0.397821	0.340996	0.290961	0.276271	0.320846	0.399851	0.461784	0.468289	0.375785	0.176211	-0.0292926	-0.157756	-0.213264	-0.215342	-0.284757	-0.404996	-0.557632	-0.681306	-0.795418	-0.907311	-0.99031	-1.00824	-0.829807	-0.509269	-0.1486	0.128905	0.284485	0.309659	0.251278	0.119556	-0.0492041	-0.159891	-0.213468
-0.843599	-0.717232	-0.553458	-0.27786	0.0403896	0.375236	0.545642	0.48413	0.215162	-0.194569	-0.597232	-0.928436	-1.12109	-1.2245	-1.26669	-1.3061	-1.25813	-1.11284	-0.890292	-0.597883	-0.286411	-0.0462859	0.0260637	-0.0743645	-0.246056	-0.388551	-0.452103	-0.505508	-0.601622	-0.744254	-0.869375	-0.88533	-0.751785	-0.500669	-0.199144	0.108377	0.337935	0.437101	0.398124	0.296746	0.116287	-0.00661896	-0.0640298	-0.119204	-0.203549	-0.276843	-0.3212	-0.320312	-0.319012	-0.258698
-0.0553134	0.0861257	0.236324	0.320793	0.316231	0.210592	0.0182782	-0.239135	-0.483633	-0.612981	-0.59744	-0.443343	-0.286523	-0.238272	-0.246681	-0.255938	-0.176088	0.00690625	0.201616	0.280274	0.221185	0.0916283	-0.00644647	-0.00445617	-0.0129522	-0.101746	-0.231672	-0.362018	-0.387915	-0.269767	-0.151321	-0.0429162	-0.0261543	-0.0463577	-0.100631	-0.159836	-0.26424	-0.370537	-0.543954	-0.744518	-0.915588	-1.0649	-1.04531	-0.875597	-0.681655	-0.572433	-0.606338	-0.695478	-0.755398	-0.765152
0.0867178	0.228622	0.399237	0.577756	0.648173	0.503519	0.15283	-0.235062	-0.565817	-0.726696	-0.757663	-0.634491	-0.488252	-0.377696	-0.331988	-0.365497	-0.501	-0.661851	-0.731666	-0.656794	-0.453452	-0.195809	0.0427784	0.234486	0.351775	0.455184	0.517294	0.557149	0.541245	0.45561	0.33499	0.287655	0.31969	0.416772	0.397127	0.24439	-0.0292884	-0.305676	-0.453737	-0.448185	-0.43553	-0.376996	-0.226521	0.0513439	0.348749	0.543291	0.616005	0.612735	0.565439	0.580671
0.0139618	-0.131183	-0.301396	-0.413173	-0.504925	-0.575417	-0.656086	-0.727332	-0.795627	-0.772745	-0.626622	-0.371927	-0.0563807	0.151739	0.254133	0.174312	0.01284	-0.121842	-0.18076	-0.0596313	0.16632	0.407286	0.579802	0.583436	0.42872	0.227782	0.0574691	-0.0025455	0.0293946	0.158567	0.275867	0.332408	0.371314	0.392153	0.360421	0.305208	0.217773	0.133813	0.0589878	-0.0610247	-0.192372	-0.329252	-0.505356	-0.638047	-0.680249	-0.636363	-0.559512	-0.52056	-0.628044	-0.832436
0.547586	0.671322	0.814487	0.941007	1.00979	0.97533	0.792312	0.558457	0.289028	0.118336	0.0507668	0.177444	0.431629	0.739955	0.984055	1.17638	1.35133	1.40556	1.47711	1.40964	1.26855	1.04912	0.800085	0.57863	0.47698	0.492952	0.553505	0.690134	0.788988	0.847475	0.786482	0.626375	0.374366	0.123822	-0.0698586	-0.185416	-0.251257	-0.362523	-0.532694	-0.780413	-1.04241	-1.23112	-1.26145	-1.06825	-0.767507	-0.415804	-0.109986	0.151692	0.310479	0.373647
-0.132465	-0.266576	-0.400753	-0.520251	-0.56104	-0.547315	-0.452258	-0.323811	-0.231272	-0.195899	-0.216518	-0.230772	-0.239437	-0.180429	-0.0903037	-0.0024897	-0.0112185	-0.061528	-0.129336	-0.0852129	-0.0224107	0.0108582	0.0218967	0.0382187	0.0703679	-0.00553434	-0.126631	-0.21623	-0.19565	-0.0849969	0.0909669	0.240301	0.367226	0.405965	0.3514	0.254633	0.0429366	-0.225188	-0.480909	-0.625505	-0.632932	-0.52439	-0.386663	-0.256312	-0.180944	-0.184692	-0.215624	-0.237817	-0.249126	-0.278465
-0.831215	-0.859772	-0.868221	-0.899102	-0.92728	-0.960339	-0.990083	-0.976658	-1.00512	-1.01665	-1.02557	-0.972496	-0.870648	-0.724678	-0.580148	-0.535024	-0.546281	-0.528471	-0.470681	-0.397846	-0.351617	-0.356637	-0.46323	-0.617045	-0.747067	-0.773961	-0.713307	-0.584294	-0.476145	-0.474488	-0.601708	-0.828948	-1.02042	-1.12674	-1.11154	-1.0483	-1.01141	-0.973321	-0.890608	-0.720199	-0.568014	-0.485886	-0.506671	-0.524402	-0.516317	-0.392681	-0.27569	-0.23823	-0.316316	-0.430458
0.199847	0.00740045	-0.185563	-0.357016	-0.511201	-0.647504	-0.746167	-0.763576	-0.727755	-0.655487	-0.56044	-0.425888	-0.251739	0.00308915	0.313933	0.542804	0.636482	0.630372	0.572152	0.531303	0.478081	0.381396	0.242295	0.1627	0.142013	0.222998	0.295865	0.261016	0.113155	-0.0396269	-0.202815	-0.306002	-0.395393	-0.448862	-0.444501	-0.407287	-0.31125	-0.200709	-0.120336	-0.122088	-0.0662282	0.00537584	0.180328	0.414611	0.686255	0.86457	0.862042	0.678438	0.391501	0.117947
0.417241	0.463432	0.453118	0.404148	0.346895	0.327809	0.328764	0.307703	0.312104	0.316153	0.267525	0.176523	0.0949764	0.0931195	0.165139	0.325816	0.519741	0.70279	0.760659	0.694296	0.572703	0.502357	0.522617	0.654749	0.737502	0.768579	0.73212	0.615047	0.481892	0.43439	0.440354	0.466185	0.490201	0.494007	0.449341	0.354027	0.2984	0.337264	0.498287	0.732611	0.958879	1.08023	1.12449	1.09694	1.05226	1.01192	0.933885	0.891491	0.85197	0.754736
0.841341	0.876754	0.935098	0.922513	0.865939	0.744638	0.64422	0.615697	0.585759	0.607056	0.660774	0.6562	0.652529	0.648529	0.709949	0.855087	0.915045	0.912363	0.757755	0.541282	0.347719	0.174091	0.0322932	-0.0572939	-0.106477	-0.12659	-0.115662	-0.158484	-0.192646	-0.222024	-0.267186	-0.304578	-0.452354	-0.61529	-0.692153	-0.649703	-0.460494	-0.196145	0.0199995	0.126602	0.0705349	-0.0445812	-0.1473	-0.243572	-0.219245	-0.153266	-0.0693634	-0.0178364	0.0448859	0.113854
-0.0611058	-0.0519832	-0.0222091	0.035957	0.0919393	0.131107	0.156377	0.188507	0.270601	0.337036	0.384523	0.325907	0.233014	0.166985	0.166728	0.19282	0.276931	0.38382	0.498548	0.565911	0.588076	0.5206	0.427614	0.384506	0.47936	0.600874	0.652221	0.587955	0.428824	0.257437	0.130011	0.126078	0.0804861	0.016298	-0.094274	-0.16912	-0.175744	-0.123205	-0.0198082	0.081889	0.169518	0.237137	0.26376	0.225251	0.107332	0.0548349	0.0355895	0.0277918	0.0504849	0.0955902
-0.133622	-0.244472	-0.327803	-0.453265	-0.516843	-0.543566	-0.493668	-0.393217	-0.189023	0.0411161	0.207859	0.284849	0.254223	0.104491	-0.137647	-0.334746	-0.420002	-0.328634	-0.0988808	0.122748	0.294785	0.313823	0.186556	-0.000894756	-0.14764	-0.213168	-0.149438	0.0507512	0.234596	0.342514	0.301594	0.131186	-0.107137	-0.333599	-0.579721	-0.809163	-1.00929	-1.08848	-1.01286	-0.826271	-0.623644	-0.583296	-0.690054	-0.867017	-0.929776	-0.830149	-0.475884	-0.0932139	0.25357	0.299921
0.196907	-0.103989	-0.35788	-0.527727	-0.564066	-0.422111	-0.162848	0.114105	0.312371	0.437701	0.513951	0.60374	0.705525	0.796413	0.892537	0.95166	0.980421	0.901097	0.709977	0.429124	0.133906	-0.0499019	-0.0611592	0.0500959	0.149106	0.192382	0.162106	0.0988186	0.0639038	0.0045265	-0.0483955	-0.115286	-0.182299	-0.222995	-0.250387	-0.241073	-0.176801	-0.0372374	0.072144	0.157605	0.0928537	-0.0901517	-0.356637	-0.585662	-0.709758	-0.787251	-0.879567	-0.974293	-1.0367	-1.02502
0.243273	0.245831	0.141566	-0.0554183	-0.22018	-0.330592	-0.278331	-0.141392	0.03599	0.126322	0.119064	0.0200685	-0.15925	-0.330416	-0.447502	-0.394268	-0.160963	0.207654	0.460607	0.403937	0.0598445	-0.38619	-0.67027	-0.663154	-0.321973	0.0589894	0.301517	0.24375	0.0313008	-0.294647	-0.523517	-0.669424	-0.69634	-0.655293	-0.476569	-0.191309	0.0331183	0.234641	0.357365	0.441376	0.458954	0.472802	0.52436	0.655806	0.802329	0.941908	0.982673	0.808414	0.495552	0.209236
0.155223	0.136574	0.0612519	-0.0384375	-0.148923	-0.233814	-0.207669	-0.0407352	0.1986	0.475513	0.776366	1.01578	1.12023	1.08646	0.957658	0.859886	0.816522	0.836317	0.852688	0.76651	0.618903	0.425721	0.235833	0.0700627	0.00231467	0.0195042	0.0708079	0.178338	0.271118	0.390237	0.490821	0.618355	0.720386	0.867988	1.04388	1.22263	1.27031	1.17251	0.92805	0.641361	0.424177	0.313345	0.309319	0.326658	0.394264	0.500319	0.701178	0.929609	1.10899	1.12152
-0.0117126	-0.251759	-0.463823	-0.584429	-0.577801	-0.440177	-0.264471	-0.155474	-0.183519	-0.309901	-0.460357	-0.446338	-0.299311	-0.106464	0.011054	-0.0353915	-0.253397	-0.520669	-0.751634	-0.829704	-0.723673	-0.574551	-0.429847	-0.325942	-0.294579	-0.294728	-0.22607	-0.0975103	0.082502	0.25996	0.342309	0.349952	0.296633	0.271409	0.312024	0.41059	0.534586	0.623906	0.672358	0.703247	0.695072	0.639463	0.545117	0.379309	0.17919	-0.0161915	-0.190543	-0.297978	-0.430503	-0.508261
0.151312	0.182907	0.248777	0.37492	0.514473	0.614881	0.588161	0.45398	0.283201	0.208215	0.249646	0.342723	0.422778	0.433311	0.419117	0.358949	0.245624	0.0920028	-0.0675292	-0.195064	-0.233312	-0.256103	-0.301393	-0.423871	-0.587931	-0.703271	-0.69547	-0.591992	-0.463856	-0.361005	-0.340329	-0.377661	-0.432709	-0.399223	-0.30047	-0.229023	-0.301326	-0.454359	-0.621399	-0.7368	-0.739935	-0.652837	-0.612358	-0.691383	-0.908589	-1.18027	-1.46747	-1.71017	-1.81218	-1.80477
-0.626731	-0.513173	-0.441987	-0.398981	-0.318432	-0.189373	-0.0565731	0.0115401	-0.00632563	-0.0828212	-0.193196	-0.261083	-0.280409	-0.286509	-0.358174	-0.433626	-0.485283	-0.525506	-0.582647	-0.649972	-0.670073	-0.649567	-0.51847	-0.344749	-0.183151	-0.121748	-0.140729	-0.200613	-0.28871	-0.374842	-0.419324	-0.347428	-0.184766	0.0268424	0.222108	0.283776	0.218265	0.0282358	-0.206889	-0.39651	-0.596695	-0.727984	-0.739718	-0.557638	-0.213452	0.145516	0.341118	0.307546	0.183597	0.0586366
0.152279	-0.170166	-0.432151	-0.585432	-0.564062	-0.44575	-0.271943	-0.129025	-0.0759302	-0.0888486	-0.199665	-0.368668	-0.589211	-0.808337	-0.965637	-0.98867	-0.875341	-0.685196	-0.544455	-0.504659	-0.614953	-0.724114	-0.727955	-0.58729	-0.341567	-0.0801112	0.131749	0.284636	0.395587	0.488687	0.534488	0.462183	0.254261	-0.0357384	-0.345292	-0.540377	-0.618474	-0.580993	-0.545328	-0.548647	-0.555438	-0.576142	-0.573022	-0.542098	-0.503258	-0.434374	-0.41654	-0.451075	-0.522974	-0.619243
-0.662235	-0.624821	-0.567807	-0.45714	-0.240961	0.0458875	0.370258	0.541744	0.49005	0.251069	-0.032435	-0.235924	-0.336639	-0.379817	-0.474084	-0.621247	-0.791076	-0.897725	-0.927474	-0.941283	-0.98801	-1.11309	-1.25889	-1.36688	-1.39831	-1.39306	-1.37929	-1.37016	-1.34685	-1.33534	-1.33113	-1.33831	-1.35198	-1.38593	-1.34687	-1.2818	-1.19367	-1.12251	-1.09933	-1.05956	-0.996068	-0.876865	-0.677428	-0.516375	-0.438056	-0.430639	-0.494967	-0.612559	-0.750761	-0.879543
-0.918004	-0.963437	-0.975594	-0.916095	-0.810632	-0.722648	-0.715809	-0.771887	-0.845274	-0.820508	-0.716786	-0.539637	-0.379093	-0.27185	-0.234032	-0.264879	-0.318035	-0.396564	-0.488058	-0.568514	-0.576588	-0.506509	-0.426848	-0.393977	-0.409226	-0.461118	-0.512867	-0.55451	-0.584963	-0.656824	-0.769025	-0.852996	-0.829707	-0.713129	-0.59829	-0.527614	-0.567687	-0.665922	-0.774732	-0.919699	-1.02869	-1.12894	-1.18874	-1.17022	-1.09968	-1.00308	-0.914491	-0.854365	-0.779751	-0.670533
-0.650153	-0.412036	-0.162153	0.0121587	0.0707524	0.00358993	-0.0671712	-0.0999335	-0.0562136	0.0069789	0.0648524	0.0850941	0.103211	0.21008	0.361455	0.503183	0.590569	0.615318	0.581036	0.501918	0.340308	0.109093	-0.148499	-0.363697	-0.446168	-0.374969	-0.216864	-0.0822621	-0.0468102	-0.133808	-0.319579	-0.498895	-0.580169	-0.567854	-0.502146	-0.469208	-0.481417	-0.535676	-0.63157	-0.724923	-0.803693	-0.846008	-0.876796	-0.88969	-0.866694	-0.77525	-0.63407	-0.477405	-0.394908	-0.384281
-0.313548	-0.343619	-0.433744	-0.58463	-0.724385	-0.823774	-0.83502	-0.757178	-0.617335	-0.440146	-0.285094	-0.181862	-0.157472	-0.220993	-0.331287	-0.419905	-0.476147	-0.491192	-0.49166	-0.462504	-0.449271	-0.433352	-0.429092	-0.405483	-0.357665	-0.294377	-0.239459	-0.200876	-0.120651	-0.0110556	0.126627	0.258845	0.348521	0.469733	0.55709	0.62994	0.669496	0.675257	0.628735	0.513557	0.316665	0.109233	-0.0294296	-0.0552067	0.0317053	0.134386	0.178163	0.107593	-0.0924486	-0.32041
-0.3461	-0.182608	-0.0287891	0.109371	0.227989	0.356395	0.51677	0.623854	0.612709	0.5881	0.586508	0.681041	0.825488	0.942469	0.948112	0.769819	0.413008	-0.0863233	-0.591375	-0.954155	-1.19431	-1.27386	-1.21751	-1.09892	-0.93308	-0.758621	-0.651114	-0.594076	-0.611873	-0.66059	-0.633966	-0.542232	-0.446678	-0.444263	-0.525906	-0.596802	-0.658259	-0.702966	-0.756197	-0.811143	-0.826622	-0.813421	-0.770294	-0.640992	-0.508507	-0.389247	-0.341943	-0.344898	-0.314683	-0.293207
-0.346313	-0.455655	-0.523696	-0.575442	-0.583498	-0.633224	-0.688705	-0.713055	-0.695677	-0.625875	-0.550963	-0.533039	-0.602357	-0.775386	-1.03751	-1.29042	-1.49065	-1.53027	-1.36729	-1.05119	-0.701366	-0.484467	-0.393084	-0.423318	-0.451347	-0.435257	-0.390659	-0.384361	-0.4049	-0.483578	-0.583321	-0.635084	-0.613725	-0.526839	-0.459252	-0.43704	-0.446263	-0.485868	-0.569078	-0.64208	-0.717937	-0.736405	-0.737887	-0.736175	-0.717572	-0.667203	-0.584165	-0.464268	-0.371856	-0.339244
-0.155285	-0.134877	-0.102948	-0.0578323	-0.05249	-0.118965	-0.232658	-0.360139	-0.419056	-0.419177	-0.389478	-0.372647	-0.42234	-0.557076	-0.754806	-0.953479	-1.16003	-1.32324	-1.48292	-1.55816	-1.52273	-1.47339	-1.45297	-1.44912	-1.43575	-1.34687	-1.19188	-1.0015	-0.832938	-0.666951	-0.547026	-0.522226	-0.601165	-0.798284	-1.01351	-1.21556	-1.32631	-1.3491	-1.32302	-1.32371	-1.38255	-1.47803	-1.55597	-1.6065	-1.66325	-1.72402	-1.79433	-1.87607	-1.93094	-1.9715
0.0291017	0.0766771	0.171239	0.287823	0.42118	0.488838	0.470087	0.382211	0.289188	0.254594	0.322885	0.439989	0.520891	0.594932	0.669194	0.734194	0.798709	0.824203	0.771591	0.642531	0.441712	0.2328	0.0534137	-0.0400974	-0.0563314	-0.0309299	-0.032939	-0.0868399	-0.171599	-0.274874	-0.371776	-0.439531	-0.469718	-0.49747	-0.477042	-0.407115	-0.315087	-0.233139	-0.200009	-0.256457	-0.336987	-0.386289	-0.351829	-0.274756	-0.184707	-0.116931	-0.131427	-0.204116	-0.318119	-0.417141
-1.02869	-1.05828	-1.10374	-1.13249	-1.16891	-1.19945	-1.17878	-1.09082	-0.917525	-0.773742	-0.628093	-0.529208	-0.486128	-0.480851	-0.525117	-0.624519	-0.774391	-0.911804	-1.02497	-1.10948	-1.19641	-1.24267	-1.31419	-1.41637	-1.55404	-1.64789	-1.67201	-1.6339	-1.53791	-1.38585	-1.2453	-1.13842	-1.06854	-1.07018	-1.14239	-1.24694	-1.34496	-1.41459	-1.50078	-1.6114	-1.72168	-1.77327	-1.728	-1.6299	-1.56877	-1.58007	-1.65652	-1.7638	-1.83559	-1.90749
0.303727	0.277813	0.222372	0.167988	0.0952384	0.0678933	0.041618	-0.000972872	-0.0599363	-0.126898	-0.201469	-0.317217	-0.39366	-0.441282	-0.409494	-0.36516	-0.38577	-0.471628	-0.624038	-0.764289	-0.858149	-0.908534	-0.897105	-0.753193	-0.525009	-0.311837	-0.184544	-0.161953	-0.209269	-0.233782	-0.250894	-0.210682	-0.149363	-0.136675	-0.143446	-0.199861	-0.270555	-0.274648	-0.191658	-0.0335395	0.185713	0.326843	0.345102	0.262118	0.0573798	-0.178309	-0.428227	-0.559419	-0.529901	-0.33757
-1.1599	-0.979056	-0.778197	-0.623827	-0.485473	-0.437823	-0.445268	-0.509141	-0.62748	-0.754053	-0.855026	-0.928674	-1.02795	-1.12057	-1.25681	-1.35742	-1.45065	-1.48992	-1.49894	-1.4636	-1.44567	-1.36256	-1.26087	-1.15445	-1.0368	-0.934048	-0.857141	-0.855108	-0.892882	-0.988275	-1.06289	-1.11846	-1.09133	-1.06278	-1.10356	-1.2518	-1.47978	-1.67134	-1.77962	-1.75149	-1.6466	-1.49279	-1.30924	-1.13635	-1.05027	-1.02384	-1.07801	-1.17397	-1.26189	-1.35419
0.485601	0.360616	0.269364	0.186805	0.196563	0.225916	0.34342	0.435178	0.480251	0.424577	0.266654	0.0349317	-0.170942	-0.29246	-0.288568	-0.218532	-0.106812	0.0579831	0.249734	0.46787	0.601719	0.657198	0.611779	0.482941	0.331849	0.245835	0.240665	0.332936	0.442992	0.427867	0.312705	0.127628	0.0522085	0.111132	0.240567	0.336082	0.346584	0.208415	0.0452252	-0.0885534	-0.194949	-0.220512	-0.15674	0.00181974	0.174082	0.259957	0.180151	-0.00618196	-0.168878	-0.32829
-1.42964	-1.32841	-1.12802	-0.861923	-0.551717	-0.324561	-0.153223	-0.0918559	-0.0986502	-0.143793	-0.241815	-0.388669	-0.605235	-0.847274	-1.09569	-1.23603	-1.26358	-1.20268	-1.14083	-1.11563	-1.12099	-1.12433	-1.09586	-1.00616	-0.89957	-0.838541	-0.861306	-0.870321	-0.809982	-0.733175	-0.628474	-0.534133	-0.385772	-0.230358	-0.0356762	0.14223	0.310479	0.433697	0.472516	0.450826	0.346718	0.146512	-0.11238	-0.415423	-0.670755	-0.83567	-0.839479	-0.781754	-0.720368	-0.657864
0.0515454	-0.0900799	-0.188154	-0.244256	-0.332049	-0.46229	-0.621392	-0.749007	-0.669865	-0.394862	0.00810225	0.377537	0.53862	0.431832	0.17164	-0.134101	-0.288195	-0.267799	-0.0707844	0.213708	0.464679	0.591822	0.645898	0.691815	0.728857	0.782835	0.778089	0.730415	0.62933	0.486665	0.351986	0.245739	0.200545	0.125442	0.0956912	0.102878	0.229853	0.437502	0.636911	0.736224	0.669285	0.47622	0.258563	0.200559	0.288783	0.501777	0.77602	0.980849	1.14063	1.19282
0.299039	0.305996	0.277274	0.211164	0.14402	0.0983923	0.124865	0.21365	0.380087	0.505896	0.568652	0.559846	0.524058	0.497404	0.466802	0.432791	0.362826	0.262561	0.150807	0.0898043	0.082799	0.164479	0.287834	0.480366	0.692152	0.807978	0.719217	0.461243	0.128929	-0.0794396	-0.148258	-0.0631572	0.162959	0.441205	0.761333	1.06773	1.308	1.37485	1.20804	0.916945	0.634173	0.470328	0.434731	0.450398	0.459259	0.428203	0.375213	0.367434	0.369186	0.383759
-0.163423	-0.0972217	-0.105001	-0.160492	-0.304003	-0.438393	-0.447056	-0.329549	-0.0470976	0.262669	0.530176	0.621366	0.481095	0.178329	-0.106642	-0.285146	-0.244062	-0.069516	0.110912	0.248551	0.307054	0.322693	0.32396	0.341598	0.365503	0.390773	0.382829	0.334445	0.260361	0.190613	0.167191	0.239561	0.404359	0.584287	0.680516	0.663668	0.591533	0.572151	0.661475	0.785627	0.917779	0.97412	0.961147	0.833716	0.583451	0.363618	0.213308	0.128588	0.117705	0.104622
-0.399525	-0.403965	-0.414999	-0.45543	-0.456075	-0.391222	-0.278547	-0.187535	-0.15249	-0.227544	-0.315057	-0.402213	-0.384369	-0.265328	-0.154098	-0.110161	-0.164581	-0.337792	-0.506853	-0.628349	-0.64644	-0.610852	-0.575054	-0.517953	-0.528759	-0.62949	-0.808687	-0.938469	-1.04566	-1.10452	-1.12229	-1.05725	-0.920581	-0.801635	-0.815167	-0.986643	-1.23477	-1.43596	-1.5357	-1.50435	-1.34772	-1.15817	-0.973964	-0.837957	-0.801592	-0.873009	-1.06744	-1.29228	-1.48803	-1.6522
0.372534	0.545346	0.700635	0.859514	0.945352	0.965871	0.852199	0.678122	0.510812	0.435337	0.487381	0.63075	0.801302	0.910317	0.935299	0.924361	0.929956	0.919073	0.84776	0.710979	0.594954	0.500586	0.490349	0.554316	0.727309	0.928283	1.07875	1.12808	1.02947	0.840703	0.600368	0.453777	0.437282	0.588196	0.866046	1.17403	1.46281	1.68046	1.79823	1.78977	1.69264	1.49192	1.24418	0.987331	0.756531	0.606678	0.560233	0.605235	0.700496	0.773779
0.162558	-0.316852	-0.727038	-1.02217	-1.13277	-1.10206	-1.04344	-0.988787	-0.994818	-1.04123	-1.14347	-1.27216	-1.30404	-1.30531	-1.16168	-0.971998	-0.824952	-0.707354	-0.642959	-0.658593	-0.778211	-1.02038	-1.25282	-1.41855	-1.49385	-1.44365	-1.25401	-1.00611	-0.740728	-0.513185	-0.339403	-0.209566	-0.20059	-0.220921	-0.305636	-0.365025	-0.423121	-0.45945	-0.440618	-0.460518	-0.542983	-0.727561	-1.01639	-1.34684	-1.61711	-1.72231	-1.627	-1.41993	-1.18648	-1.0649
0.189014	0.044251	-0.0904547	-0.106769	-0.0258734	0.118731	0.261999	0.307052	0.172139	-0.0191973	-0.177496	-0.265823	-0.258368	-0.307526	-0.411486	-0.533732	-0.625634	-0.648245	-0.560491	-0.416888	-0.261548	-0.126793	-0.0481565	-0.0703818	-0.154032	-0.29885	-0.452568	-0.541765	-0.58513	-0.586757	-0.599597	-0.677693	-0.734905	-0.757006	-0.742173	-0.706167	-0.708191	-0.76091	-0.852952	-0.907866	-0.81533	-0.551427	-0.222888	0.0442809	0.161457	0.160056	0.101155	0.0709282	0.0875888	0.0896965
-0.658856	-0.604099	-0.585145	-0.531959	-0.468674	-0.37311	-0.342241	-0.359138	-0.420827	-0.46257	-0.500364	-0.465217	-0.371328	-0.23539	-0.141808	-0.125815	-0.174015	-0.287562	-0.405756	-0.507806	-0.608736	-0.729697	-0.786352	-0.887792	-0.959587	-0.951621	-0.892057	-0.759294	-0.617572	-0.530157	-0.543505	-0.591416	-0.63177	-0.571988	-0.391713	-0.151243	0.030248	0.137768	0.159564	0.0773751	-0.0607237	-0.247752	-0.434632	-0.580928	-0.627037	-0.565069	-0.431425	-0.282188	-0.186538	-0.207717
-0.572826	-0.465496	-0.33142	-0.145603	0.0321502	0.198973	0.295214	0.316818	0.353218	0.427059	0.513063	0.53096	0.496521	0.362799	0.195992	0.0679272	-0.0185928	-0.155714	-0.357968	-0.544246	-0.654287	-0.604676	-0.410021	-0.192863	-0.0738838	-0.0264397	-0.0208152	0.0494716	0.201475	0.357052	0.418405	0.334951	0.160124	-0.00360602	-0.0277527	0.114792	0.374684	0.672607	0.917787	1.05491	1.0513	0.962672	0.851543	0.715421	0.598171	0.503946	0.447194	0.424618	0.363192	0.217348
1.25047	1.07379	0.992644	0.90702	0.824987	0.700922	0.553293	0.438902	0.446287	0.646605	0.956933	1.3079	1.58614	1.8058	1.95496	2.01173	1.99901	2.00274	2.07244	2.20149	2.37422	2.55394	2.69688	2.80957	2.83177	2.77058	2.63579	2.46195	2.26112	2.04524	1.80475	1.55284	1.36158	1.17957	1.03728	0.983082	0.989011	1.0979	1.22847	1.33492	1.42148	1.44454	1.41446	1.37084	1.26537	1.12458	0.984935	0.912678	0.933649	1.01197
0.225709	0.0548302	-0.15439	-0.295413	-0.384777	-0.394382	-0.417556	-0.407364	-0.440284	-0.534548	-0.615507	-0.70226	-0.704931	-0.641579	-0.487962	-0.275831	-0.114057	-0.0281583	-0.0081445	-0.0518278	-0.048622	-0.0334148	-0.0667375	-0.202077	-0.439834	-0.671229	-0.826297	-0.775774	-0.503506	-0.157541	0.101572	0.236749	0.269727	0.230031	0.161242	0.0741122	0.0030844	-0.042839	-0.114328	-0.213916	-0.406473	-0.623292	-0.817306	-0.872495	-0.796966	-0.648208	-0.477225	-0.318116	-0.210896	-0.147397
-0.145593	-0.163447	-0.164267	-0.147001	-0.0972315	-0.00796842	0.111108	0.223919	0.275743	0.244829	0.161491	0.039789	-0.100205	-0.296341	-0.567732	-0.912406	-1.29362	-1.66059	-1.96515	-2.18971	-2.34628	-2.44901	-2.49194	-2.46002	-2.34018	-2.13547	-1.84971	-1.51868	-1.16291	-0.819273	-0.49336	-0.224465	-0.0157714	0.120091	0.170421	0.138677	0.0312898	-0.132535	-0.339072	-0.548657	-0.725059	-0.826729	-0.896195	-0.950657	-1.00336	-1.06628	-1.13404	-1.19937	-1.24526	-1.26016
-0.915032	-0.827515	-0.706027	-0.558093	-0.395674	-0.239965	-0.108852	-0.0062543	0.0908381	0.191352	0.314869	0.459438	0.600579	0.726267	0.81615	0.853739	0.843996	0.789167	0.687719	0.537232	0.339699	0.111385	-0.135746	-0.378433	-0.579288	-0.688418	-0.664204	-0.520955	-0.294629	-0.0589931	0.139352	0.277668	0.349368	0.35263	0.278485	0.134265	-0.0714241	-0.3213	-0.586275	-0.839226	-1.04027	-1.16694	-1.22886	-1.25485	-1.26908	-1.27407	-1.26227	-1.22493	-1.16856	-1.11015
-0.838094	-0.914257	-1.01771	-1.15711	-1.30957	-1.44641	-1.54044	-1.56444	-1.5102	-1.39399	-1.2581	-1.1498	-1.08993	-1.05747	-1.0172	-0.940771	-0.806857	-0.612124	-0.401113	-0.212779	-0.0754707	-0.0099605	-0.0286394	-0.0910413	-0.208168	-0.344229	-0.491241	-0.644463	-0.808529	-0.979541	-1.13	-1.23634	-1.23859	-1.13937	-0.986542	-0.862136	-0.828921	-0.905819	-1.04687	-1.20489	-1.36385	-1.49415	-1.59998	-1.66979	-1.6794	-1.61591	-1.48124	-1.26285	-0.990956	-0.708073
-0.99577	-1.13214	-1.25981	-1.36225	-1.44573	-1.51911	-1.6037	-1.66999	-1.68642	-1.6384	-1.52855	-1.38428	-1.21336	-1.045	-0.921432	-0.873073	-0.907205	-0.982832	-1.04592	-1.03516	-0.961648	-0.864445	-0.81087	-0.849753	-0.978061	-1.17877	-1.40085	-1.58894	-1.70004	-1.70235	-1.58323	-1.38312	-1.17704	-1.01662	-0.92695	-0.909348	-0.969193	-1.07997	-1.1989	-1.30689	-1.4076	-1.48365	-1.50446	-1.4814	-1.45052	-1.43083	-1.39954	-1.3453	-1.25311	-1.10892
1.65554	1.71565	1.7506	1.73043	1.62022	1.41171	1.12899	0.836596	0.621833	0.562761	0.625732	0.802853	1.03523	1.27555	1.48003	1.64078	1.75623	1.82386	1.82934	1.77064	1.61277	1.3475	0.944929	0.434031	-0.113922	-0.583966	-0.870066	-0.941699	-0.765993	-0.389506	0.0935907	0.554574	0.885316	1.03064	0.995423	0.84948	0.686615	0.555813	0.430234	0.261762	0.0514923	-0.180837	-0.343818	-0.429767	-0.428534	-0.365511	-0.240297	-0.0931342	0.0461281	0.154095
-0.289906	-0.324452	-0.344298	-0.362138	-0.387914	-0.434363	-0.487241	-0.533886	-0.573767	-0.611077	-0.650446	-0.702314	-0.75736	-0.777849	-0.758249	-0.682108	-0.550381	-0.360291	-0.130951	0.104023	0.29209	0.3703	0.321233	0.158674	-0.0502644	-0.235307	-0.338359	-0.362506	-0.35867	-0.332125	-0.297642	-0.257044	-0.223532	-0.184816	-0.146576	-0.118405	-0.116985	-0.13954	-0.186795	-0.238093	-0.268791	-0.243076	-0.15509	-0.0348204	0.0569532	0.0841418	0.0537183	-0.00206567	-0.0550671	-0.0954558
1.21107	1.31027	1.42037	1.52269	1.59755	1.61865	1.58854	1.49709	1.37876	1.2445	1.1149	0.998022	0.91359	0.870031	0.877279	0.928488	0.992581	1.04548	1.08203	1.09854	1.09551	1.08595	1.07245	1.07034	1.06534	1.06098	1.05037	1.02712	1.00543	1.0019	1.02722	1.06461	1.1085	1.13689	1.15145	1.13945	1.09431	0.999607	0.865871	0.71866	0.604398	0.529321	0.484218	0.458876	0.455447	0.453398	0.460818	0.483076	0.522615	0.602512
-1.5135	-1.60916	-1.73904	-1.91127	-2.10773	-2.30784	-2.48836	-2.5979	-2.62076	-2.5846	-2.51667	-2.45624	-2.40682	-2.35649	-2.29802	-2.23424	-2.16576	-2.08972	-1.99071	-1.87005	-1.75355	-1.6489	-1.57779	-1.54025	-1.52205	-1.48041	-1.40129	-1.31277	-1.27123	-1.30663	-1.39828	-1.50356	-1.55597	-1.50856	-1.36714	-1.19701	-1.05932	-0.997737	-1.00581	-1.05354	-1.1044	-1.108	-1.0532	-0.960224	-0.882618	-0.821418	-0.774339	-0.715366	-0.638342	-0.548449
-1.60215	-1.5497	-1.49513	-1.4221	-1.2997	-1.12545	-0.921365	-0.714997	-0.543293	-0.411493	-0.299434	-0.215316	-0.187866	-0.239219	-0.392561	-0.642658	-0.981013	-1.34923	-1.67358	-1.87939	-1.96487	-1.90204	-1.72891	-1.50856	-1.27078	-1.05735	-0.887482	-0.757645	-0.663313	-0.611792	-0.623348	-0.679798	-0.71419	-0.709804	-0.662716	-0.614535	-0.622723	-0.701227	-0.839799	-0.953673	-1.01638	-1.03698	-1.0232	-0.990878	-0.959659	-0.956066	-0.983203	-1.02558	-1.05888	-1.07513
1.58506	1.66541	1.73958	1.79915	1.84372	1.87066	1.88737	1.89715	1.91282	1.9223	1.93167	1.93891	1.9555	1.97902	1.99209	1.98843	1.93434	1.85184	1.76186	1.69036	1.65672	1.66409	1.67871	1.69294	1.69425	1.68202	1.63307	1.51684	1.32862	1.10571	0.926539	0.869207	0.977292	1.21369	1.47659	1.63171	1.61293	1.44164	1.20371	0.995534	0.850287	0.777271	0.738266	0.730073	0.717562	0.71037	0.711207	0.715712	0.721176	0.721474
-0.0150776	0.102853	0.249533	0.391505	0.485135	0.512379	0.481574	0.403154	0.321957	0.246952	0.198201	0.169772	0.135323	0.0559615	-0.111465	-0.362027	-0.671914	-0.968351	-1.22883	-1.45545	-1.67225	-1.84968	-1.95113	-1.95237	-1.89197	-1.82021	-1.77132	-1.77081	-1.79183	-1.79221	-1.72316	-1.53716	-1.2067	-0.775826	-0.359439	-0.0928227	-0.0532693	-0.221905	-0.46529	-0.64949	-0.706915	-0.657159	-0.589988	-0.561609	-0.584748	-0.634154	-0.659835	-0.661242	-0.641686	-0.623188
-0.184938	-0.141889	-0.101532	-0.0559729	-0.0154752	0.0283963	0.0625613	0.075061	0.0923691	0.120502	0.215374	0.344265	0.47859	0.563096	0.564647	0.472566	0.337726	0.220335	0.154883	0.15543	0.183292	0.209764	0.239601	0.276742	0.329726	0.383987	0.427084	0.413619	0.342449	0.239531	0.175927	0.250608	0.493122	0.850416	1.19338	1.40274	1.42389	1.27226	1.03613	0.795154	0.619735	0.552575	0.565175	0.593962	0.609579	0.608741	0.597132	0.583336	0.579369	0.580317
1.25495	1.29306	1.31981	1.32584	1.31484	1.33223	1.39158	1.49857	1.6139	1.69405	1.72259	1.66391	1.49815	1.23771	0.933958	0.639208	0.41584	0.275481	0.250302	0.343449	0.54782	0.842094	1.17147	1.46407	1.65911	1.71296	1.62935	1.42639	1.1424	0.838679	0.591863	0.444377	0.412918	0.435016	0.462365	0.456254	0.405577	0.289361	0.106646	-0.145354	-0.466522	-0.800381	-1.09392	-1.2985	-1.42659	-1.47817	-1.49626	-1.50971	-1.52731	-1.55478
-2.61294	-2.78296	-2.87246	-2.83389	-2.63484	-2.29478	-1.9079	-1.57532	-1.33905	-1.21969	-1.17005	-1.14532	-1.10731	-1.03696	-0.925983	-0.799798	-0.662797	-0.53534	-0.426611	-0.330817	-0.239489	-0.153816	-0.0971809	-0.0719047	-0.0694768	-0.0619137	-0.058796	-0.0807698	-0.14076	-0.267993	-0.477354	-0.74998	-1.05083	-1.34523	-1.6003	-1.81047	-2.00911	-2.20881	-2.40011	-2.54603	-2.62216	-2.6399	-2.60577	-2.54853	-2.50362	-2.47208	-2.44076	-2.39864	-2.34721	-2.29225
1.4947	1.43843	1.35481	1.25763	1.18494	1.17334	1.24076	1.32511	1.32241	1.14884	0.779682	0.300226	-0.181418	-0.547877	-0.73508	-0.72993	-0.608286	-0.463158	-0.390376	-0.443483	-0.614758	-0.879773	-1.16433	-1.40999	-1.58873	-1.70453	-1.79285	-1.85538	-1.89238	-1.88851	-1.80125	-1.58553	-1.25462	-0.862197	-0.519241	-0.304969	-0.238874	-0.294905	-0.405508	-0.508432	-0.577598	-0.607942	-0.605638	-0.598672	-0.571414	-0.513723	-0.447981	-0.395338	-0.387643	-0.428235
-1.13815	-1.41072	-1.65844	-1.85338	-1.95219	-1.92779	-1.84604	-1.73748	-1.62963	-1.50545	-1.29089	-0.958331	-0.522132	-0.089336	0.231046	0.312159	0.176656	-0.0139798	-0.14494	-0.149464	-0.0224996	0.153145	0.320248	0.455318	0.526908	0.495218	0.3337	0.0132507	-0.399683	-0.810917	-1.10792	-1.206	-1.12464	-0.896458	-0.55456	-0.150492	0.173159	0.29395	0.172311	-0.137451	-0.544789	-0.924503	-1.20022	-1.37069	-1.47161	-1.5093	-1.50228	-1.46392	-1.51261	-1.65863
-2.47897	-2.54617	-2.61239	-2.68474	-2.76313	-2.83975	-2.89385	-2.90251	-2.8476	-2.72292	-2.54069	-2.32525	-2.11152	-1.95959	-1.90148	-1.92701	-2.01518	-2.12318	-2.23655	-2.3414	-2.42989	-2.4612	-2.40674	-2.24588	-1.97787	-1.63495	-1.25358	-0.847675	-0.425833	0.0145468	0.429383	0.779638	1.01539	1.12868	1.12721	1.03476	0.873802	0.678567	0.493486	0.350192	0.274443	0.237014	0.225857	0.211457	0.19986	0.184716	0.188387	0.195496	0.191257	0.136863
-0.960064	-1.06216	-1.16791	-1.27829	-1.35227	-1.40622	-1.44318	-1.47994	-1.50048	-1.55625	-1.62257	-1.6729	-1.68287	-1.66692	-1.64953	-1.68	-1.72105	-1.654	-1.40829	-0.969546	-0.452636	-0.0277141	0.218148	0.287087	0.288235	0.284263	0.287753	0.290782	0.31873	0.352037	0.345358	0.300028	0.230785	0.141231	0.0130005	-0.174471	-0.404727	-0.636353	-0.830699	-0.923495	-0.878809	-0.700945	-0.456107	-0.195114	-0.000800781	0.0900926	0.0600563	-0.0601018	-0.218738	-0.393881
-0.988363	-1.02999	-1.04331	-1.06889	-1.08717	-1.09949	-1.12321	-1.1308	-1.11438	-1.06335	-0.979503	-0.867124	-0.732023	-0.560514	-0.399573	-0.288054	-0.237989	-0.255851	-0.296335	-0.307097	-0.254473	-0.137559	0.00923842	0.165372	0.311469	0.445863	0.548811	0.629001	0.653387	0.570986	0.391003	0.133632	-0.113159	-0.270171	-0.305345	-0.272685	-0.25575	-0.348405	-0.582438	-0.898777	-1.20424	-1.39519	-1.47444	-1.46777	-1.43222	-1.39402	-1.35227	-1.32261	-1.29991	-1.30669
-0.496199	-0.548528	-0.605467	-0.649734	-0.65858	-0.611885	-0.512475	-0.371373	-0.212753	-0.0617399	0.0740663	0.183219	0.26524	0.318829	0.357694	0.386752	0.41696	0.44339	0.466587	0.47887	0.478885	0.468946	0.459398	0.447761	0.435605	0.414823	0.374555	0.295627	0.160325	-0.0364193	-0.278863	-0.524963	-0.728377	-0.858545	-0.915858	-0.935304	-0.963234	-1.03212	-1.14954	-1.28685	-1.41878	-1.51982	-1.58366	-1.60598	-1.59672	-1.57367	-1.54634	-1.52372	-1.50529	-1.48703
1.0107	1.05503	1.08379	1.07629	0.989437	0.774852	0.455658	0.0918066	-0.229586	-0.431291	-0.487321	-0.397948	-0.225368	-0.0391294	0.099333	0.189116	0.255471	0.327194	0.404308	0.444247	0.418139	0.306107	0.17492	0.093707	0.105526	0.198294	0.293438	0.34664	0.371302	0.414298	0.479668	0.557126	0.619668	0.690957	0.753798	0.79382	0.778418	0.669638	0.472373	0.22424	0.0125257	-0.125412	-0.21039	-0.272323	-0.294513	-0.301103	-0.288056	-0.259285	-0.218151	-0.13431
0.311131	0.329181	0.320688	0.286621	0.213758	0.131727	0.100047	0.172208	0.381772	0.707837	1.09652	1.45753	1.73932	1.91594	1.96922	1.9233	1.83309	1.72069	1.6147	1.54166	1.49667	1.48728	1.51447	1.61791	1.75265	1.86952	1.88199	1.75217	1.47422	1.13261	0.851523	0.717727	0.747005	0.843859	0.92011	0.912369	0.830844	0.682448	0.523187	0.393343	0.307553	0.269058	0.281736	0.315847	0.352666	0.351003	0.332065	0.32792	0.365256	0.427197
2.14359	2.17065	2.2008	2.224	2.24443	2.26186	2.27347	2.27819	2.26522	2.24714	2.22616	2.22079	2.23852	2.27402	2.31291	2.34675	2.36065	2.35998	2.34681	2.32454	2.30379	2.27292	2.20713	2.08351	1.89431	1.64001	1.32608	0.96759	0.579124	0.185269	-0.178069	-0.452057	-0.622969	-0.684791	-0.676218	-0.650761	-0.65568	-0.696695	-0.740151	-0.752261	-0.728683	-0.685961	-0.631173	-0.587465	-0.552223	-0.530231	-0.518678	-0.51187	-0.516552	-0.526136
0.194533	0.100049	-0.0160825	-0.132647	-0.242548	-0.329122	-0.397952	-0.444457	-0.484542	-0.51776	-0.561836	-0.615577	-0.656924	-0.683765	-0.691851	-0.69135	-0.692951	-0.686573	-0.663854	-0.616474	-0.530154	-0.418613	-0.308203	-0.204541	-0.104816	0.00408269	0.140541	0.29881	0.454406	0.576204	0.630884	0.603337	0.507037	0.380584	0.260645	0.17024	0.103065	0.0433421	-0.0310172	-0.11049	-0.195219	-0.271436	-0.327495	-0.36116	-0.373597	-0.372149	-0.362557	-0.350769	-0.342148	-0.350619
-1.49534	-1.49768	-1.50668	-1.52889	-1.57148	-1.61831	-1.66746	-1.70688	-1.73513	-1.73878	-1.73093	-1.72415	-1.72583	-1.74373	-1.75737	-1.72431	-1.61385	-1.44861	-1.22995	-1.00353	-0.775448	-0.571417	-0.41194	-0.336214	-0.357162	-0.457977	-0.592419	-0.708297	-0.783046	-0.808177	-0.799734	-0.762486	-0.71878	-0.684168	-0.671449	-0.686247	-0.712259	-0.727875	-0.728751	-0.719427	-0.716412	-0.718893	-0.718794	-0.709188	-0.704544	-0.703569	-0.706867	-0.717858	-0.723902	-0.721508
0.213909	0.149985	0.0687582	-0.0344426	-0.138816	-0.23154	-0.308874	-0.374576	-0.442535	-0.524916	-0.636301	-0.786212	-0.974207	-1.1842	-1.39081	-1.57176	-1.69778	-1.77888	-1.80872	-1.7871	-1.68239	-1.4723	-1.16102	-0.810673	-0.481943	-0.220536	-0.0420089	0.0673466	0.124082	0.140329	0.125429	0.088142	0.0452877	0.0198311	0.0135263	0.0201163	0.0112577	-0.0275008	-0.0882829	-0.15302	-0.197906	-0.221746	-0.223797	-0.214839	-0.199426	-0.18617	-0.183763	-0.194578	-0.210244	-0.224577
-0.351967	-0.289509	-0.222766	-0.189269	-0.185111	-0.211681	-0.255736	-0.304872	-0.354126	-0.400102	-0.45484	-0.519864	-0.571922	-0.563862	-0.490521	-0.363227	-0.256061	-0.263482	-0.437924	-0.754726	-1.12807	-1.43133	-1.6115	-1.68466	-1.69856	-1.69376	-1.66212	-1.62152	-1.54451	-1.45501	-1.36813	-1.3274	-1.31847	-1.31634	-1.30236	-1.25218	-1.19735	-1.17865	-1.18771	-1.2014	-1.15581	-1.03267	-0.83741	-0.570403	-0.253152	0.0759952	0.382919	0.578517	0.625293	0.508935
0.945491	0.920671	0.903479	0.904701	0.920744	0.945391	0.957969	0.95478	0.935345	0.917277	0.909993	0.918386	0.952249	0.996885	1.05128	1.10346	1.1436	1.1754	1.19237	1.20094	1.20006	1.19652	1.18922	1.17056	1.14019	1.1006	1.06256	1.03103	1.01664	1.01118	1.00724	0.999941	1.00062	1.00954	1.0148	1.01571	0.989392	0.931687	0.856767	0.790628	0.74086	0.698605	0.660825	0.627626	0.606158	0.609728	0.643801	0.683996	0.70706	0.69622
-1.54482	-1.53227	-1.51967	-1.53277	-1.56699	-1.60372	-1.64809	-1.69217	-1.74462	-1.80745	-1.86677	-1.93785	-2.00394	-2.04538	-2.00493	-1.85181	-1.59321	-1.29894	-1.05136	-0.897369	-0.844763	-0.882467	-0.982935	-1.10165	-1.21251	-1.29709	-1.34024	-1.36122	-1.35653	-1.3748	-1.45588	-1.5982	-1.81072	-2.0138	-2.17498	-2.28239	-2.30908	-2.28046	-2.23382	-2.19987	-2.20215	-2.25504	-2.33428	-2.43715	-2.53516	-2.59292	-2.60034	-2.57153	-2.53087	-2.50725
0.448594	0.514825	0.649882	0.83083	1.00203	1.10565	1.13646	1.11803	1.085	1.08419	1.10157	1.13171	1.16341	1.18101	1.19379	1.17673	1.12271	1.01866	0.846484	0.618381	0.381266	0.186998	0.10304	0.129493	0.23128	0.338125	0.413434	0.45022	0.448929	0.416356	0.36554	0.305413	0.244554	0.209073	0.202589	0.24338	0.286594	0.288804	0.253906	0.204708	0.177408	0.190594	0.242317	0.284195	0.289693	0.272454	0.253696	0.268253	0.300519	0.348532
-1.27653	-1.30766	-1.35171	-1.38745	-1.40124	-1.36061	-1.24668	-1.07464	-0.877078	-0.712011	-0.62908	-0.637065	-0.724414	-0.858034	-1.02094	-1.18146	-1.32378	-1.43067	-1.51173	-1.58426	-1.66591	-1.75597	-1.83331	-1.8606	-1.80718	-1.6704	-1.47159	-1.25439	-1.04704	-0.866026	-0.723317	-0.626312	-0.581061	-0.587976	-0.624229	-0.659564	-0.68164	-0.683957	-0.686745	-0.718953	-0.780242	-0.836823	-0.863893	-0.858685	-0.83776	-0.820017	-0.808868	-0.809482	-0.813103	-0.820369
-0.791482	-0.849509	-0.908237	-1.03733	-1.11159	-1.06389	-0.887128	-0.657874	-0.390813	-0.152019	0.00217157	0.109528	0.13004	0.0253485	-0.142755	-0.289044	-0.358634	-0.376098	-0.406897	-0.457781	-0.504204	-0.497643	-0.444888	-0.407418	-0.451	-0.514128	-0.54239	-0.509725	-0.384687	-0.232593	-0.108875	-0.0591908	0.0234077	0.219445	0.433081	0.625693	0.773784	0.851607	0.852628	0.761557	0.614818	0.467384	0.383268	0.417101	0.512226	0.68601	0.846021	0.959524	1.0602	1.08352
0.963391	1.01398	1.02211	1.04091	1.07281	1.10243	1.17341	1.21267	1.15078	0.957501	0.69247	0.425737	0.250638	0.183241	0.287191	0.520145	0.73411	0.834934	0.825467	0.752341	0.623126	0.452712	0.341557	0.34992	0.476665	0.665466	0.86022	0.959958	0.962305	0.857809	0.721635	0.583825	0.462542	0.394776	0.362709	0.34556	0.409381	0.500626	0.5895	0.630596	0.658349	0.650447	0.633168	0.639492	0.699312	0.773194	0.815441	0.806736	0.741262	0.683529
0.0975779	0.0308305	-0.0403884	-0.173321	-0.31795	-0.452547	-0.586318	-0.711688	-0.744512	-0.686605	-0.573822	-0.494603	-0.419973	-0.399796	-0.389101	-0.396859	-0.356256	-0.401077	-0.462314	-0.518256	-0.468729	-0.297353	-0.0955167	0.0304355	-0.0600614	-0.242781	-0.438803	-0.45782	-0.259446	0.042849	0.36584	0.579269	0.635686	0.575837	0.518042	0.423931	0.43776	0.470314	0.470323	0.429662	0.373267	0.394911	0.477432	0.601375	0.61482	0.476646	0.232321	-0.00893647	-0.102261	-0.091846
-0.221479	-0.427493	-0.615076	-0.685265	-0.662304	-0.626882	-0.647942	-0.756211	-0.898083	-1.06147	-1.10266	-1.08701	-1.02854	-0.881081	-0.693387	-0.518271	-0.396192	-0.389797	-0.4465	-0.499389	-0.564591	-0.657957	-0.819498	-0.96867	-1.07733	-1.10903	-1.07292	-0.966955	-0.810449	-0.640139	-0.497167	-0.46415	-0.491511	-0.559756	-0.637888	-0.738271	-0.861969	-0.915323	-0.822871	-0.677475	-0.452416	-0.274526	-0.234101	-0.281066	-0.420363	-0.63359	-0.905547	-1.13722	-1.23921	-1.05335
-0.639497	-0.739391	-0.836361	-0.916891	-0.95704	-0.911043	-0.797523	-0.672026	-0.525725	-0.419414	-0.383276	-0.401976	-0.46718	-0.530441	-0.603743	-0.644173	-0.649867	-0.631483	-0.586724	-0.533334	-0.470356	-0.398626	-0.329886	-0.204142	-0.0318496	0.132971	0.246774	0.177225	-0.0687688	-0.37122	-0.601142	-0.697453	-0.678739	-0.635759	-0.587562	-0.522844	-0.463404	-0.320994	-0.195605	-0.112304	-0.0918576	-0.171575	-0.339105	-0.589249	-0.849941	-1.00533	-1.04083	-0.969834	-0.89498	-0.87431
0.202125	0.111256	-0.051415	-0.191838	-0.345068	-0.368438	-0.304505	-0.241889	-0.265294	-0.363334	-0.431437	-0.392862	-0.272335	-0.0998923	0.0312767	0.099945	0.140612	0.130508	0.0852256	-0.0160588	-0.168649	-0.32253	-0.469222	-0.538122	-0.485882	-0.34479	-0.119909	0.0745881	0.134365	0.0396033	-0.186635	-0.431475	-0.634425	-0.733813	-0.704186	-0.603963	-0.464301	-0.341132	-0.271307	-0.215572	-0.191876	-0.167453	-0.215815	-0.266737	-0.318477	-0.343192	-0.423093	-0.520486	-0.614008	-0.596626
-0.160183	-0.036742	0.031448	0.0237445	-0.0218698	-0.0717674	-0.100491	-0.143701	-0.138912	-0.144071	-0.15948	-0.193261	-0.299698	-0.427368	-0.566023	-0.633901	-0.562376	-0.334078	-0.0927445	0.100884	0.188	0.198576	0.127919	-0.0170223	-0.147708	-0.221527	-0.172117	-0.0328519	0.156219	0.308505	0.434583	0.482684	0.456644	0.352051	0.211733	0.0369346	-0.147894	-0.32039	-0.487555	-0.577008	-0.61963	-0.632255	-0.626902	-0.64728	-0.634557	-0.619319	-0.585299	-0.571818	-0.551046	-0.554983
0.268565	0.176393	0.0961058	0.0210083	-0.042549	-0.0699836	-0.0387496	0.0577905	0.223666	0.449182	0.608809	0.643513	0.525323	0.280102	0.00687091	-0.196085	-0.253816	-0.166891	0.0105949	0.198377	0.355783	0.45626	0.45227	0.411454	0.32221	0.249452	0.271709	0.369623	0.490976	0.58607	0.637443	0.642534	0.608961	0.548897	0.51761	0.445244	0.330646	0.183593	0.0550251	-0.0219773	0.0399789	0.143743	0.252353	0.287858	0.201261	0.0634277	-0.0950972	-0.204572	-0.262673	-0.261841
-0.0384812	0.0755509	0.110522	0.0742142	-0.0364238	-0.159222	-0.255967	-0.306853	-0.337144	-0.412967	-0.543508	-0.651121	-0.702178	-0.682962	-0.685775	-0.724036	-0.836324	-0.949146	-1.07153	-1.17709	-1.2457	-1.26378	-1.26776	-1.29286	-1.37399	-1.52768	-1.6317	-1.65341	-1.54019	-1.33385	-1.12145	-0.918104	-0.802853	-0.816549	-0.888096	-1.05413	-1.29782	-1.51785	-1.6899	-1.77026	-1.7693	-1.68371	-1.55705	-1.41721	-1.33513	-1.26456	-1.21549	-1.12967	-1.02342	-0.920579
0.615346	0.579242	0.508857	0.389727	0.296642	0.232039	0.214558	0.172661	0.0920843	-0.0389639	-0.249057	-0.493047	-0.694035	-0.732038	-0.656854	-0.488019	-0.358501	-0.29757	-0.277088	-0.246574	-0.187279	-0.0979988	0.0267573	0.116504	0.133716	0.00991068	-0.242304	-0.502435	-0.666851	-0.66333	-0.494101	-0.318326	-0.158658	-0.0658912	-0.0275823	-0.031455	-0.0471894	-0.000840996	0.0522254	0.0811777	0.0895884	0.0170942	-0.0213467	0.0162114	0.119787	0.308033	0.48722	0.657532	0.725776	0.741132
-0.663627	-0.511505	-0.381562	-0.309055	-0.268268	-0.235299	-0.1152	-0.0316721	0.0391471	0.056413	0.00924722	-0.0632346	-0.149036	-0.159059	-0.142586	-0.139078	-0.146875	-0.155569	-0.164001	-0.114038	-0.0366991	0.00604835	-0.04006	-0.235341	-0.505264	-0.723283	-0.83298	-0.862455	-0.9218	-1.05841	-1.20836	-1.22898	-1.11035	-0.886786	-0.694506	-0.647783	-0.74838	-0.877004	-1.04737	-1.25489	-1.42872	-1.46883	-1.31257	-1.05524	-0.790121	-0.61856	-0.503325	-0.41096	-0.340354	-0.283111
-0.0692903	0.100615	0.209425	0.220935	0.117062	-0.009543	-0.127299	-0.22425	-0.284533	-0.241184	-0.0642533	0.234208	0.475356	0.519146	0.347637	0.137268	0.068617	0.198469	0.430326	0.556532	0.546458	0.441584	0.418606	0.542898	0.692619	0.73024	0.567065	0.306054	0.0662128	-0.126653	-0.243132	-0.23516	-0.139795	-0.0274337	0.0438475	0.089915	0.136412	0.0890191	-0.0226926	-0.0973292	-0.14387	-0.143507	-0.0235405	0.154078	0.363096	0.479046	0.490152	0.466538	0.439647	0.381353
0.473843	0.552526	0.519362	0.432189	0.248652	0.00336472	-0.200279	-0.313056	-0.357188	-0.298575	-0.170199	-0.0541271	0.0927645	0.195058	0.228341	0.137523	0.00128641	-0.0215017	0.112016	0.391293	0.715249	0.995335	1.09877	1.00799	0.844391	0.654368	0.489956	0.413472	0.420788	0.527523	0.659775	0.760078	0.720813	0.595319	0.466568	0.345296	0.266719	0.229375	0.251115	0.324271	0.422109	0.559574	0.65265	0.679512	0.652438	0.548743	0.44156	0.468638	0.689043	1.04956
-2.00857	-1.89948	-1.75316	-1.62704	-1.57861	-1.66843	-1.90856	-2.26946	-2.6575	-2.97373	-3.08464	-2.87201	-2.31754	-1.48689	-0.504611	0.464064	1.27647	1.84094	2.18797	2.41206	2.57802	2.73337	2.81683	2.8807	2.93853	2.9934	3.0347	3.06147	3.08953	3.08089	3.04616	2.99511	2.93817	2.80972	2.61262	2.36438	2.13849	2.00293	1.96804	1.9857	2.00632	2.02592	2.05306	2.1308	2.23255	2.33941	2.37955	2.38687	2.42919	2.58656
-0.760381	-1.06002	-1.37327	-1.65162	-1.82623	-1.89803	-1.85662	-1.70662	-1.43586	-1.05941	-0.652861	-0.294815	-0.0309075	0.109406	0.105874	-0.012293	-0.190725	-0.335735	-0.394268	-0.33289	-0.177153	0.00198319	0.120254	0.122473	0.0386984	-0.0905057	-0.243539	-0.404518	-0.541359	-0.64193	-0.715138	-0.771449	-0.823502	-0.90658	-1.03256	-1.20922	-1.40305	-1.62122	-1.86902	-2.08484	-2.23526	-2.3183	-2.33917	-2.3278	-2.32594	-2.32409	-2.30204	-2.24625	-2.17501	-2.16647
-1.00958	-1.05319	-1.07941	-1.05778	-1.01874	-0.979028	-0.980088	-1.01401	-1.07006	-1.10739	-1.12374	-1.1269	-1.14163	-1.18583	-1.24274	-1.26505	-1.22258	-1.13456	-1.03783	-0.966083	-0.923356	-0.905424	-0.921596	-0.96192	-1.01215	-1.05749	-1.0805	-1.07193	-1.06299	-1.04893	-1.05379	-1.07732	-1.13167	-1.21366	-1.29575	-1.37953	-1.44854	-1.50817	-1.52662	-1.48013	-1.37619	-1.25419	-1.16512	-1.12678	-1.09144	-1.02307	-0.911501	-0.803249	-0.761193	-0.808248
0.0571818	-0.107162	-0.303217	-0.536448	-0.819213	-1.08406	-1.26126	-1.29537	-1.15724	-0.934377	-0.759572	-0.792852	-1.03924	-1.37463	-1.56171	-1.39586	-0.856834	-0.0574087	0.783034	1.4956	2.02922	2.40666	2.68153	2.86339	2.96181	2.971	2.90531	2.81209	2.75998	2.77245	2.80319	2.84209	2.84889	2.81297	2.70511	2.49723	2.20507	1.86733	1.55004	1.29967	1.16589	1.13146	1.16943	1.23634	1.32416	1.42646	1.55881	1.75061	1.98302	2.22387
-1.09287	-1.05857	-1.00778	-0.942242	-0.857597	-0.765086	-0.669636	-0.569027	-0.4637	-0.364938	-0.277871	-0.18353	-0.0677609	0.0492328	0.143683	0.194599	0.189338	0.163139	0.154814	0.185437	0.252501	0.32178	0.364212	0.380972	0.386209	0.394389	0.422763	0.484983	0.572707	0.669984	0.762027	0.825947	0.839141	0.789206	0.6893	0.568968	0.453783	0.362269	0.296516	0.255249	0.231016	0.220872	0.216652	0.222284	0.247753	0.300332	0.375584	0.464124	0.56342	0.663707
0.183542	0.222326	0.273921	0.350621	0.412985	0.460805	0.49914	0.514122	0.532476	0.530163	0.478654	0.385821	0.264182	0.138677	0.00334959	-0.161196	-0.370579	-0.616621	-0.841782	-0.963619	-0.952523	-0.884344	-0.82655	-0.803652	-0.794039	-0.739534	-0.565378	-0.272616	0.0848737	0.407052	0.684834	0.894966	1.02082	1.04377	0.978364	0.853076	0.694036	0.480671	0.229336	-0.0486819	-0.34966	-0.603471	-0.767261	-0.792879	-0.709973	-0.586071	-0.48656	-0.440484	-0.470765	-0.552873
-0.366867	-0.33593	-0.2897	-0.201068	-0.133435	-0.0778555	-0.10346	-0.143025	-0.141753	-0.0823152	-0.0594606	-0.106813	-0.2051	-0.251022	-0.163307	0.0538084	0.304805	0.516576	0.660413	0.685924	0.61039	0.500292	0.401346	0.328034	0.257221	0.244222	0.350364	0.558798	0.70996	0.750418	0.68882	0.524527	0.355861	0.225385	0.142565	0.0831209	0.0869249	0.11362	0.149926	0.147631	0.0815412	0.00250953	-0.0604594	-0.0806903	-0.0638569	-0.000871469	0.0727081	0.132319	0.201274	0.25335
1.32473	1.10179	0.930335	0.853824	0.848263	0.83051	0.688979	0.376155	-0.0307552	-0.374781	-0.618297	-0.746995	-0.688595	-0.451063	-0.108567	0.249362	0.470997	0.53293	0.413987	0.14191	-0.142484	-0.36394	-0.482316	-0.47664	-0.396451	-0.264963	-0.090705	0.061769	0.190907	0.291205	0.324566	0.298044	0.203396	0.00408886	-0.270218	-0.53556	-0.739434	-0.851751	-0.894408	-0.912189	-0.94947	-1.03048	-1.09216	-1.12383	-1.14038	-1.04769	-0.847249	-0.537695	-0.194983	0.102911
0.18799	0.188645	0.212262	0.223725	0.206016	0.164036	0.107894	0.0759355	0.0989621	0.0883808	0.0275576	-0.0410076	-0.0976937	-0.0812073	0.015709	0.127586	0.162064	0.0944003	-0.0829062	-0.320549	-0.579603	-0.780801	-0.856086	-0.859679	-0.820671	-0.749464	-0.727772	-0.721997	-0.716692	-0.684588	-0.593372	-0.449746	-0.309786	-0.162993	-0.0856002	-0.116673	-0.190133	-0.327006	-0.450614	-0.556763	-0.665577	-0.811737	-0.968723	-1.1015	-1.1175	-1.01575	-0.794404	-0.500386	-0.264894	-0.0863277
1.24556	1.20457	1.11176	1.00367	0.870281	0.691601	0.510485	0.336939	0.278334	0.313407	0.455837	0.639748	0.767353	0.819483	0.82732	0.781851	0.70144	0.57531	0.354176	0.0916273	-0.150771	-0.294226	-0.32286	-0.226705	-0.10075	0.0374926	0.0560913	-0.0115471	-0.102986	-0.136503	-0.14009	-0.136423	-0.090132	-0.0283331	0.0646103	0.149823	0.226617	0.208703	0.107047	-0.0482633	-0.173876	-0.252974	-0.299393	-0.377542	-0.525137	-0.708829	-0.886833	-0.934017	-0.816314	-0.526624
-0.0948839	-0.164215	-0.16627	-0.124607	-0.0269428	0.100369	0.195703	0.21591	0.22904	0.285872	0.435402	0.6738	0.91071	1.05805	1.09583	1.04042	0.887366	0.724828	0.529042	0.406439	0.372588	0.43552	0.599034	0.731559	0.753806	0.710812	0.670399	0.669388	0.727554	0.789069	0.767591	0.625324	0.43682	0.315755	0.348979	0.470786	0.588481	0.567985	0.392101	0.130894	-0.097474	-0.240023	-0.258945	-0.147801	-0.00101862	0.0785066	0.0906372	0.0207166	-0.0698519	-0.105239
0.568139	0.135438	-0.337619	-0.839071	-1.26469	-1.56223	-1.68677	-1.64143	-1.46837	-1.22526	-0.971693	-0.791303	-0.698199	-0.664594	-0.64737	-0.609142	-0.485422	-0.302443	-0.0667796	0.116244	0.238938	0.228923	0.108214	-0.0457969	-0.146352	-0.135179	-0.0474963	0.089895	0.2129	0.244573	0.201128	0.123552	0.0388898	-0.0489682	-0.145336	-0.22918	-0.272939	-0.313673	-0.348343	-0.407747	-0.503452	-0.616268	-0.688181	-0.702151	-0.760296	-0.800522	-0.79154	-0.707452	-0.603161	-0.517762
-0.0153557	-0.380404	-0.672653	-0.742997	-0.64746	-0.437468	-0.295874	-0.215235	-0.224043	-0.311297	-0.372394	-0.391667	-0.384051	-0.372606	-0.389573	-0.453145	-0.535404	-0.646914	-0.795788	-1.01969	-1.2071	-1.25259	-1.11411	-0.837116	-0.550062	-0.383566	-0.291822	-0.291228	-0.31768	-0.386722	-0.495086	-0.582089	-0.585725	-0.552789	-0.502016	-0.469693	-0.462047	-0.512016	-0.600902	-0.748117	-0.951045	-1.20079	-1.46066	-1.63066	-1.74391	-1.71937	-1.66977	-1.60946	-1.56157	-1.47492
0.134214	0.0459513	-0.0599058	-0.19185	-0.369392	-0.591815	-0.853214	-1.09744	-1.27776	-1.27541	-1.16094	-0.941972	-0.784811	-0.678356	-0.678832	-0.712238	-0.770906	-0.825995	-0.89645	-0.898454	-0.820479	-0.719852	-0.592177	-0.513932	-0.480246	-0.422697	-0.351612	-0.217238	-0.0849498	0.0650462	0.212472	0.294038	0.249678	0.0479643	-0.302055	-0.747539	-1.14198	-1.40923	-1.47836	-1.43604	-1.39711	-1.40594	-1.47473	-1.59097	-1.60413	-1.52848	-1.35676	-1.18606	-1.08594	-1.06236
0.0264705	0.229616	0.437564	0.542432	0.577456	0.524215	0.45924	0.382412	0.28081	0.116355	-0.0822605	-0.234064	-0.292237	-0.238577	-0.1601	-0.0549539	-0.0121274	-0.0722144	-0.236495	-0.48819	-0.711966	-0.867927	-0.824322	-0.590849	-0.275579	-0.127987	-0.196713	-0.526272	-0.92948	-1.2196	-1.27837	-1.16048	-0.950826	-0.724455	-0.495263	-0.266118	-0.0831449	0.0554335	0.0868849	0.0477391	-0.0521004	-0.188307	-0.303929	-0.361637	-0.376897	-0.445385	-0.615067	-0.783491	-0.876791	-0.84784
0.140632	0.188048	0.16468	0.0453138	-0.167758	-0.454228	-0.704725	-0.821407	-0.787612	-0.70889	-0.663359	-0.706078	-0.789342	-0.852372	-0.874237	-0.917438	-0.945921	-0.990394	-1.00436	-0.977303	-0.881859	-0.716148	-0.521712	-0.318263	-0.184784	-0.13685	-0.204174	-0.38105	-0.658189	-0.9117	-1.05758	-1.04684	-0.91877	-0.740073	-0.617152	-0.603953	-0.721304	-0.949467	-1.20991	-1.37137	-1.34168	-1.13337	-0.832347	-0.590437	-0.494591	-0.49727	-0.525687	-0.531697	-0.527191	-0.454178
0.898665	0.679517	0.482114	0.327267	0.221104	0.213781	0.27002	0.32379	0.338	0.227785	0.0421192	-0.211635	-0.396374	-0.456935	-0.428073	-0.385291	-0.342299	-0.2632	-0.145309	0.0730468	0.342014	0.53905	0.546885	0.368415	0.130914	-0.00205573	0.0296957	0.175457	0.33886	0.412883	0.410708	0.310744	0.195613	0.0372149	-0.168105	-0.4317	-0.682258	-0.860493	-0.909268	-0.809675	-0.630154	-0.423511	-0.207674	-0.0427573	0.12058	0.258039	0.381025	0.434112	0.391742	0.256438
0.980276	0.850588	0.643086	0.389903	0.096939	-0.134332	-0.288943	-0.290133	-0.240891	-0.204413	-0.255239	-0.310118	-0.336331	-0.232471	-0.0567062	0.0884347	0.229825	0.242528	0.148395	-0.0816021	-0.321306	-0.531828	-0.648823	-0.662531	-0.560684	-0.346299	-0.0921197	0.0600393	0.0794915	-0.0308251	-0.203955	-0.365896	-0.471794	-0.462486	-0.365274	-0.191429	-0.00771463	0.14696	0.143689	-0.0142373	-0.252726	-0.399741	-0.354123	-0.141153	0.113187	0.321546	0.331644	0.187428	0.0203215	-0.12015
0.305647	0.362815	0.436156	0.497088	0.474615	0.272594	-0.0333935	-0.379366	-0.622353	-0.693907	-0.595486	-0.432622	-0.306525	-0.257995	-0.196658	-0.104096	0.00816693	0.0839763	0.0346796	-0.0780165	-0.211442	-0.312654	-0.325023	-0.319668	-0.310316	-0.288698	-0.286423	-0.236449	-0.146838	-0.0619995	-0.0309622	-0.0775239	-0.118089	-0.102008	-0.0532672	-0.0779786	-0.23009	-0.475264	-0.669213	-0.72194	-0.583547	-0.24766	0.108675	0.33316	0.292203	0.148988	-0.0668591	-0.232837	-0.322877	-0.384539
-0.95288	-0.878319	-0.701333	-0.440145	-0.160152	0.0531604	0.109156	0.0286132	-0.124019	-0.278223	-0.352349	-0.401823	-0.350386	-0.261478	-0.163906	-0.0932402	-0.0551619	-0.0885484	-0.159404	-0.282436	-0.440497	-0.605137	-0.804263	-0.914477	-0.979845	-0.971803	-0.946005	-0.826281	-0.653198	-0.457074	-0.310611	-0.238505	-0.238426	-0.294045	-0.287162	-0.215251	-0.150947	-0.245345	-0.499418	-0.87176	-1.25903	-1.5475	-1.59958	-1.45764	-1.16636	-0.792566	-0.418265	-0.184903	-0.183556	-0.388829
-0.162997	0.0268546	0.283511	0.515932	0.663145	0.638928	0.472927	0.213451	-0.0154387	-0.168685	-0.249604	-0.277405	-0.284608	-0.250165	-0.216643	-0.261105	-0.354648	-0.481875	-0.592786	-0.637782	-0.602233	-0.495586	-0.356172	-0.288407	-0.301235	-0.355878	-0.443213	-0.498618	-0.525111	-0.534683	-0.528685	-0.522724	-0.486152	-0.466932	-0.464464	-0.461464	-0.434305	-0.409998	-0.390722	-0.381043	-0.455983	-0.538898	-0.6108	-0.579863	-0.477114	-0.354049	-0.358484	-0.47277	-0.634796	-0.739456
-1.1934	-0.938835	-0.760832	-0.626092	-0.507528	-0.353049	-0.156169	0.0399023	0.172015	0.207852	0.138608	0.0654589	-0.00536748	-0.014658	0.0236928	0.128326	0.222474	0.315557	0.431389	0.494818	0.545819	0.558767	0.536394	0.537151	0.600964	0.663745	0.68201	0.601109	0.475212	0.399505	0.376285	0.396864	0.419261	0.384332	0.353129	0.331487	0.346709	0.417827	0.471837	0.521816	0.520799	0.438018	0.286414	0.0764338	-0.174609	-0.383422	-0.502672	-0.480155	-0.301312	-0.0955544
-0.418543	-0.306309	-0.212245	-0.119459	-0.0640731	-0.0847569	-0.155987	-0.183642	-0.11403	0.000195237	0.094932	0.0889579	0.0138282	-0.0362243	0.0344466	0.194655	0.398358	0.576308	0.644372	0.54613	0.329243	0.0403624	-0.242703	-0.464548	-0.601744	-0.688216	-0.732418	-0.734343	-0.683368	-0.558084	-0.407844	-0.338786	-0.357549	-0.421293	-0.498564	-0.552169	-0.580652	-0.577186	-0.536645	-0.479195	-0.402447	-0.339732	-0.304616	-0.323548	-0.402182	-0.522846	-0.596535	-0.628138	-0.588642	-0.490696
0.94794	0.852152	0.753322	0.687664	0.66259	0.686116	0.729241	0.778215	0.789042	0.751154	0.664833	0.581173	0.505853	0.402369	0.255665	0.0202833	-0.285168	-0.613825	-0.862096	-0.962464	-0.872962	-0.598682	-0.177022	0.296012	0.689297	0.988442	1.19369	1.31735	1.38766	1.4329	1.41871	1.32569	1.13962	0.877764	0.590255	0.299155	0.0595939	-0.107524	-0.216941	-0.292572	-0.345058	-0.397262	-0.455613	-0.533939	-0.603422	-0.647115	-0.644861	-0.591915	-0.497264	-0.373291
0.0838608	-0.0511034	-0.202499	-0.344711	-0.44875	-0.495742	-0.488086	-0.452154	-0.408025	-0.362533	-0.309494	-0.249779	-0.185692	-0.127515	-0.0719279	-0.0188738	0.0296267	0.0661006	0.082524	0.0670316	0.0158856	-0.060426	-0.130813	-0.152581	-0.113716	-0.0388207	0.0324277	0.0705809	0.0756491	0.0627972	0.0636714	0.0839707	0.101776	0.0895048	0.00483036	-0.161858	-0.392754	-0.623797	-0.807252	-0.919418	-0.971609	-0.981699	-0.967507	-0.950174	-0.939048	-0.936089	-0.939129	-0.945129	-0.954411	-0.965291
0.515855	0.428666	0.332416	0.268022	0.259521	0.291344	0.309815	0.269425	0.147234	-0.0208316	-0.206735	-0.418873	-0.679003	-0.990396	-1.33516	-1.67505	-1.95591	-2.15044	-2.22041	-2.11871	-1.85328	-1.48089	-1.04688	-0.572071	-0.0746887	0.415326	0.842029	1.20598	1.48704	1.68042	1.76036	1.75171	1.69008	1.64549	1.69064	1.8238	1.97983	2.04505	1.9215	1.59182	1.17696	0.797112	0.579471	0.547253	0.652107	0.827435	0.982434	1.06312	1.05608	0.987736
1.18885	1.11121	1.04811	1.00086	0.983877	0.964837	0.913101	0.784981	0.58825	0.291129	-0.101277	-0.583592	-1.13344	-1.70133	-2.21494	-2.57729	-2.79202	-2.90171	-2.99225	-3.0743	-3.13955	-3.13164	-3.02775	-2.82284	-2.52885	-2.18554	-1.82366	-1.47048	-1.10742	-0.724707	-0.30989	0.0964968	0.403082	0.560288	0.545567	0.375891	0.153134	-0.0983748	-0.364773	-0.64197	-0.903308	-1.06445	-1.08264	-0.987962	-0.836892	-0.706539	-0.623567	-0.543996	-0.415803	-0.202849
-1.63641	-1.68066	-1.70703	-1.70849	-1.699	-1.69652	-1.727	-1.78908	-1.87289	-1.96199	-2.03547	-2.08967	-2.12204	-2.13458	-2.11008	-2.03722	-1.90195	-1.71114	-1.47121	-1.21189	-0.948952	-0.703053	-0.499225	-0.348055	-0.264217	-0.229291	-0.218203	-0.209956	-0.188912	-0.142218	-0.0918551	-0.0610776	-0.0575943	-0.0771445	-0.0974712	-0.109587	-0.108736	-0.104836	-0.11134	-0.137187	-0.178809	-0.215548	-0.242294	-0.246857	-0.240989	-0.239691	-0.246448	-0.262863	-0.276901	-0.279937
0.741336	0.638823	0.503707	0.356437	0.25543	0.235297	0.325826	0.496054	0.724176	0.961887	1.17766	1.35449	1.4725	1.56177	1.62701	1.69755	1.75648	1.77438	1.68256	1.45548	1.11011	0.725828	0.381228	0.158356	0.052767	0.0426428	0.139475	0.349432	0.646015	0.951179	1.22508	1.4454	1.57783	1.61503	1.57469	1.5032	1.42644	1.36297	1.35211	1.40697	1.52098	1.66583	1.79525	1.88452	1.94582	1.96918	1.95925	1.92439	1.88577	1.85369
-1.99786	-1.82068	-1.60228	-1.34271	-1.03785	-0.697442	-0.338014	-0.0237151	0.212787	0.346286	0.415581	0.448692	0.468019	0.477157	0.474508	0.446249	0.39499	0.34294	0.312	0.319503	0.355602	0.404903	0.43829	0.435344	0.406156	0.380293	0.39736	0.474813	0.596059	0.731325	0.837573	0.894311	0.908154	0.896025	0.845374	0.745323	0.59707	0.401132	0.19304	0.0377601	-0.0325306	0.000982193	0.111694	0.263063	0.404552	0.506023	0.568703	0.599558	0.600894	0.576112
-0.0960943	-0.233235	-0.38823	-0.556363	-0.681748	-0.729861	-0.70878	-0.623805	-0.515883	-0.419413	-0.370256	-0.413965	-0.554063	-0.783	-1.03215	-1.24129	-1.34947	-1.3243	-1.18405	-0.964022	-0.698705	-0.427502	-0.208976	-0.0377261	0.108414	0.233589	0.333126	0.393018	0.432573	0.449874	0.44059	0.399713	0.349521	0.302364	0.283924	0.281338	0.274874	0.220601	0.114142	-0.0211826	-0.142041	-0.208415	-0.202416	-0.143391	-0.0739266	-0.0165127	0.011622	0.0217116	0.0433277	0.119476
0.405917	0.270138	0.122347	-0.0251097	-0.137789	-0.221811	-0.25169	-0.214309	-0.0892295	0.0985606	0.276181	0.38437	0.429294	0.404225	0.292799	0.07404	-0.25878	-0.691943	-1.15976	-1.62759	-2.07535	-2.48213	-2.76983	-2.87881	-2.81163	-2.62216	-2.38216	-2.12749	-1.81638	-1.48189	-1.1585	-0.914057	-0.805124	-0.869112	-1.04837	-1.3266	-1.63193	-1.95911	-2.27077	-2.55167	-2.81731	-3.10189	-3.42621	-3.7449	-3.9671	-4.02405	-3.85765	-3.4924	-3.00868	-2.52927
0.450416	0.45571	0.478693	0.530385	0.603044	0.691092	0.781927	0.867499	0.930221	0.937416	0.882289	0.772109	0.622519	0.481964	0.39996	0.396306	0.464234	0.582041	0.724722	0.874656	1.01838	1.16248	1.31801	1.48353	1.62966	1.73713	1.79231	1.81138	1.82523	1.84933	1.89586	1.94385	1.96482	1.91386	1.78118	1.57579	1.33967	1.10139	0.895283	0.747052	0.635775	0.545557	0.502889	0.545439	0.685216	0.896503	1.10468	1.25118	1.27949	1.18267
0.466402	0.724681	0.999906	1.22224	1.32449	1.286	1.16501	1.02369	0.914061	0.85075	0.827439	0.824329	0.846934	0.894387	0.94921	1.01125	1.07596	1.15535	1.22243	1.2654	1.28518	1.27198	1.23836	1.16186	1.0276	0.824953	0.589542	0.369732	0.248542	0.297611	0.519831	0.841574	1.1617	1.41762	1.61037	1.72217	1.7222	1.57719	1.28643	0.957243	0.740042	0.732282	0.929614	1.24457	1.54031	1.73749	1.83263	1.89416	1.9746	2.09941
-0.0242352	0.0272648	0.0939926	0.161238	0.230026	0.296555	0.352661	0.393285	0.419319	0.43137	0.447596	0.465808	0.472025	0.451563	0.401041	0.332202	0.259384	0.17908	0.0979574	0.00925646	-0.0840204	-0.166473	-0.239118	-0.303407	-0.378476	-0.499812	-0.661746	-0.833534	-0.967745	-1.02313	-0.980807	-0.849353	-0.673548	-0.503773	-0.382784	-0.323153	-0.323384	-0.360676	-0.408017	-0.43036	-0.429949	-0.411045	-0.378986	-0.34444	-0.308721	-0.277433	-0.249826	-0.234857	-0.234623	-0.252919
-0.443833	-0.395956	-0.342834	-0.311563	-0.322377	-0.386006	-0.529876	-0.75472	-1.04325	-1.32824	-1.56141	-1.69945	-1.76826	-1.79732	-1.84649	-1.95305	-2.12263	-2.32703	-2.53377	-2.70344	-2.82535	-2.91126	-2.98154	-3.08471	-3.25857	-3.50255	-3.75063	-3.89653	-3.80925	-3.44949	-2.8628	-2.16476	-1.49144	-0.929088	-0.493419	-0.195879	-0.0399165	-0.00938856	-0.0655196	-0.158415	-0.240806	-0.301303	-0.352058	-0.406924	-0.479333	-0.558344	-0.623944	-0.680422	-0.720843	-0.7314
0.762739	0.78915	0.784255	0.740938	0.663874	0.535803	0.359397	0.164745	-0.0273885	-0.173696	-0.262122	-0.254486	-0.169068	-0.0419872	0.115356	0.27363	0.403484	0.513056	0.605034	0.687564	0.752344	0.774585	0.74641	0.666003	0.492732	0.20901	-0.199752	-0.701857	-1.24564	-1.77117	-2.19475	-2.4437	-2.45563	-2.20981	-1.77421	-1.27249	-0.840614	-0.596815	-0.564159	-0.707794	-0.916822	-1.11629	-1.24984	-1.30929	-1.29672	-1.2416	-1.1569	-1.09735	-1.07854	-1.1106
0.13956	0.491581	0.750209	0.863364	0.743379	0.413737	0.000451421	-0.411511	-0.634789	-0.643359	-0.505337	-0.257517	-0.026915	0.130342	0.187324	0.103347	-0.0561778	-0.232564	-0.369851	-0.446204	-0.412832	-0.223848	-0.0346493	0.130627	0.268565	0.333264	0.239163	0.106039	-0.00433981	0.00465326	0.0507172	0.0946483	0.0202201	-0.177223	-0.428072	-0.592444	-0.588946	-0.513433	-0.426303	-0.413487	-0.473446	-0.586806	-0.68649	-0.778964	-0.845814	-0.985108	-1.17145	-1.37376	-1.56044	-1.66765
-1.04712	-0.821716	-0.635475	-0.533397	-0.482745	-0.452554	-0.407517	-0.340935	-0.193862	-0.020376	0.113789	0.163766	0.0737701	-0.143962	-0.434046	-0.633416	-0.665461	-0.51737	-0.315145	-0.0599314	0.210432	0.400776	0.459024	0.356221	0.184097	-0.0052754	-0.115226	-0.105555	-0.0100059	0.0931073	0.135176	0.127529	0.106433	0.0393926	-0.130518	-0.317297	-0.454894	-0.499121	-0.445554	-0.359479	-0.261896	-0.201523	-0.15775	-0.0864191	-0.0441751	-0.0638677	-0.203027	-0.400205	-0.521899	-0.527394
-0.354511	-0.0364166	0.201468	0.342197	0.35667	0.322311	0.335559	0.380482	0.437207	0.448185	0.399921	0.33446	0.207713	0.0319903	-0.223816	-0.46355	-0.627189	-0.706697	-0.654146	-0.576703	-0.459843	-0.352414	-0.209919	-0.115608	-0.103781	-0.20878	-0.325038	-0.386562	-0.367247	-0.311731	-0.278577	-0.214729	-0.133869	-0.0221139	0.129781	0.367043	0.508828	0.495767	0.359286	0.180647	-0.0163349	-0.151512	-0.240414	-0.332662	-0.455449	-0.560397	-0.621501	-0.648386	-0.683225	-0.706184
0.152479	0.147061	0.186898	0.226665	0.257636	0.302571	0.360082	0.43593	0.538315	0.706894	0.920237	1.09242	1.22517	1.36942	1.57711	1.79569	1.99863	2.14155	2.20731	2.19513	2.14489	2.09544	2.00824	1.84877	1.64389	1.51919	1.50322	1.61293	1.83042	2.00446	2.04389	1.89729	1.59794	1.18911	0.77295	0.439746	0.263941	0.201471	0.238311	0.259651	0.202398	0.153127	0.0784742	0.0552362	0.000603723	-0.0609181	-0.096433	-0.0981657	-0.0320278	0.0128488
0.522829	0.292701	0.102363	-0.0784552	-0.184487	-0.185603	-0.15867	-0.0980725	-0.0441221	-0.00892327	0.0407262	0.0939878	0.0973482	0.129371	0.14601	0.156658	0.160185	0.164646	0.18729	0.175904	0.13802	0.0963476	0.00318317	-0.0934879	-0.112155	-0.0343972	0.116127	0.237687	0.279349	0.224914	0.167071	0.201949	0.37297	0.628149	0.839147	0.850491	0.689785	0.397854	0.0921077	-0.104856	-0.239924	-0.310858	-0.386204	-0.487538	-0.554268	-0.560645	-0.466829	-0.306279	-0.213758	-0.273203
-0.197742	-0.232178	-0.209775	-0.146833	-0.0601174	0.0159339	0.0519045	0.061697	0.121428	0.238069	0.407402	0.566023	0.706795	0.813854	0.909181	0.961626	0.915281	0.803848	0.585631	0.350327	0.102327	-0.075432	-0.164378	-0.188421	-0.163862	-0.0488719	0.165536	0.424899	0.717483	0.984761	1.17497	1.24821	1.18918	0.985612	0.676508	0.34083	0.107279	0.0462823	0.124922	0.270553	0.358007	0.38461	0.319807	0.200521	0.0633693	-0.0599051	-0.0560758	0.0292188	0.181189	0.289113
[truncated: 681 more rows]
[truncated: 91 more columns]

## Sheet: Figure 1N-CIE
0.217325	0.0963243	0.0242292	-0.0157349	0.0007315	0.0268431	0.000333854	-0.0255514	-0.0160243	0.0757442	0.210977	0.338589	0.41879	0.427689	0.386069	0.335403	0.322739	0.411238	0.547278	0.726597	0.932316	1.10529	1.27123	1.40582	1.53491	1.66413	1.74802	1.75525	1.69492	1.54066	1.33589	1.18453	1.13439	1.20554	1.34558	1.46565	1.51965	1.45247	1.30754	1.09682	0.875239	0.673081	0.578418	0.565921	0.581559	0.64699	0.67567	0.639753	0.557086	0.386465
[truncated: 1,674 more rows]
[truncated: 91 more columns]

[truncated: 11 more sheets: Figure 1N-Net AUC, Figure 1O-Air, Figure 1O-CIE, Figure 1O-Net AUC, Figure 1P-Air, Figure 1P-CIE, Figure 1P-Net AUC, Figure 1Q-Air, Figure 1Q-CIE, Figure 1Q-Net AUC, Figure 1S, U]
