# Supplementary material for: Mechanism for differential recruitment of orbitostriatal transmission during actions and outcomes following chronic alcohol exposure
Source: eLife. 2021 Mar 17;10:e67065. doi: 10.7554/eLife.67065 (PMC8016477; doi:10.7554/eLife.67065)
Supplement: Figure 2—figure supplement 1—source data 1. [file elife-67065-fig2-figsupp1-data1.xlsx]

## Sheet: Figure 2-figure supplement 1
B. Air							B. CIE							C. Air	C. CIE
81.29	106.04	112.067	106.303	90.9049	99.9061		112.977	103.79	100.564	107.265	99.0858	93.7371		61.51	33.19
108.75	97.1528	106.027	89.6807	74.7784	101.871		111.891	100.264	100.007	95.2038	102.881	98.499		33.21	50.8
111.29	106.972	94.7397	119.858	115.666	106.807		75.1194	104.319	86.4066	108.007	109.632	78.5484		68.85	49.44
106.926	97.1195	100.533	97.6645	106.267	95.4056		96.3244	98.9237	95.54	83.2723	90.7355	114.16		84.6	58.15
91.7436	92.716	110.533	86.4938	112.384	96.0098		103.688	92.7036	117.482	106.252	97.665	115.055		44.31	33.09
84.0862	88.348	97.8197	53.7423	86.4212	93.2844		78.485	52.5166	86.1878	68.9678	75.6118	96.6011		77.21	61.44
112.891	80.1896	92.1191	102.421	61.3817	77.7871		63.004	49.9821	79.7063	44.8602	82.4817	79.1542
39.0138	74.9277	103.1	98.1621	78.352	81.411		63.0716	36.7829	62.2459	83.9765	81.8594	85.5116
34.0727	53.9885	87.0398	103.538	81.6821	81.7749		46.2879	37.4971	54.3449	85.9547	60.3695	69.144
34.4966	61.4734	85.7622	91.4514	59.9249	89.7208		45.1205	29.1499	61.8916	53.7933	53.8568	70.8316
47.2577	60.0134	93.4769	94.2253	73.7559	72.5769		48.4174	55.2336	52.9149	71.6813	36.0892	63.7998
57.4076	65.1592	81.2118	88.701	44.1138	79.8805		38.9211	61.9773	59.3118	65.3911	41.2523	60.0347
60.6244	65.3717	81.3446	91.6262	40.5472	83.1816		29.0856	60.8697	49.1242	69.7343	36.9429	48.0123
56.9707	65.6095	92.1434	96.8277	42.5823	76.1359		35.7974	64.6865	50.4994	58.2685	37.116	57.8022
39.0609	59.1529	77.1252	94.0066	34.5398	69.6811		38.0015	56.8256	63.3599	53.3101	32.6416	50.3573
30.0232	62.6801	71.886	88.0041	32.4151	72.3199		36.747	55.8384	61.2429	58.8021	37.9414	63.4593
12.5237	62.4082	72.0755	91.5501	34.3061	93.1433		31.5346	51.4146	48.0727	69.4198	31.3042	61.7824
34.9127	54.003	64.3189	80.205	45.9129	75.4086		37.3519	46.2716	52.7495	74.1659	27.0834	62.072
36.4493	66.7158	66.6471	93.5809	50.1135	69.3615		31.5909	49.1806	40.58	40.8035	38.6245	61.3004
52.1555	61.7244	69.3376	69.6459	58.8188	75.7992		28.7452	51.2802	44.5704	47.5457	30.5083	58.5787
D. Air						D. CIE									E. Air	E. CIE
85.644	90.6938	92.8855	107.457	97.9855		102.806	102.456	90.0902	102.784	98.1	73.5855	104.244	109.89		127.21	93.99
91.4835	104.629	110.079	100.362	85.8925		99.3181	97.4679	88.3856	94.7318	102.396	101.87	106.748	91.9562		76.22	68.85
101.179	101.588	89.2291	91.1266	107.465		108.794	94.8436	93.428	96.0555	98.4873	108.659	89.6988	109.653		105.55	137.08
107.189	104.692	100.239	99.2993	110.53		101.248	106.687	120.035	111.702	105.064	109.967	100.944	101.7		97.94	102.77
114.505	98.3969	107.567	101.754	98.1276		87.8341	98.545	108.062	94.7269	95.9527	105.918	98.3657	86.8002		94.64	103.74
116.691	96.7272	119.081	94.6435	98.1398		73.8963	71.1422	84.4543	93.035	82.0744	101.165	109.382	87.5169			86.14
84.9834	105.585	108.641	100.839	88.7634		72.3919	61.5496	75.2509	98.3637	74.4102	95.1276	104.169	77.2727			93.86
53.5069	104.765	101.839	94.0651	85.9242		69.5575	61.0443	119.573	73.1108	85.2245	91.378	105.426	98.1425			91.56
84.0136	89.6139	88.3138	97.2844	97.4707		74.0133	54.2766	151.441	79.1304	82.3968	95.4996	104.571	82.0165
92.6941	98.9078	96.8455	94.7145	89.9085		61.679	53.4905	153.122	69.7945	88.9704	95.4946	103.518	95.3379
131.924	87.4484	97.8322	98.8844	82.1177		84.6918	77.9674	173.941	65.4949	95.5123	106.07	103.873	104.226
130.146	90.5243	98.3213	95.5291	82.1048		141.827	66.2285	167.641	104.286	103.848	95.7119	102.507	91.0954
132.274	80.2802	106.496	94.0577	79.2476		124.991	71.6141	135.926	72.4568	103.109	81.2991	108.124	64.9495
139.862	91.2094	117.912	106.039	74.4411		144.312	66.5082	163.653	79.9495	98.7874	65.3148	104.161	85.7158
141.017	83.8304	108.057	111.428	86.1868		114.047	74.6202	137.773	67.4676	102.81	97.1788	99.7907	80.7211
126.072	74.6035	117.874	104.175	104.926		96.1515	77.5124	148.914	84.0266	112.025	89.5995	99.6737	70.1665
130.615	79.298	96.9611	110.02	98.4627		92.2533	69.1497	141.952	116.194	99.3664	86.7128	90.4056	94.0265
133.113	76.064	103.298	118.011	97.4012		96.7275	68.3069	149.708	96.3814	102.851	92.5849	95.4133	95.891
132.141	75.1011	104.265	117.13	75.8337		102.524	68.6907	130.481	108.17	95.5253	74.2709	94.9537	97.3144
114.092	76.0368	105.37	106.51	96.5624		82.2913	60.5941	114.32	109.093	108.917	87.5084	88.8429	100.411
F. Air							F. CIE									F. CIE SR					G. Air	G. CIE	G. CIE_SR
90.6563	97.2948	103.363	113.267	109.632	89.7856		95.8898	91.1279	89.5994	105.213	133.579	109.394	91.2411	111.144		108.608	105.67	88.9751	89.3905		101.48	137.1	96.62
100.848	98.8803	87.7716	117.929	104.15	90.7618		85.0879	107.504	94.1898	107.268	124.391	110.144	91.8825	107.354		91.3218	96.3029	88.5249	78.5934		116.61	113.03	71.13
128.644	94.408	85.0317	107.441	91.6499	91.0672		98.8723	114.905	103.037	109.273	101.928	105.346	93.1525	102.478		101.068	108.764	102.324	96.4017		115.93	90.64	111.56
100.351	98.8989	102.172	93.5779	94.7366	117.014		114.217	95.8811	101.272	98.6386	80.6585	91.7357	110.583	96.9945		96.6093	87.1922	108.218	112.541		80.54	145.94	119.13
79.5008	110.518	121.661	67.7855	99.8317	111.372		105.933	90.5818	111.902	79.6069	59.4438	83.3812	113.141	82.0293		107.191	102.071	115.958	123.073		87.81	72.71
92.573	118.328	137.996	87.4416	67.2881	112.892		82.3175	83.8559	105.364	84.8949	46.9396	63.3811	116.595	44.7904		79.3101	114.134	118.716	122.838		111.91	54.17
90.5801	115.626	147.862	85.6605	83.8923	110.217		73.3711	100.684	86.9518	46.0973	40.0082	58.3343	109.791	34.4119		78.0932	101.112	122.551	140.921			62.73
79.6504	115.666	164.731	84.1921	87.2734	109.653		73.6916	107.756	98.8644	32.8776	36.9261	52.3053	91.4444	46.015		89.323	103.936	119.469	133.316			84.54
84.5505	113.794	131.156	70.1003	98.9361	108.415		89.2176	116.001	98.0727	32.3995	34.5629	45.4696	106.679	68.2536		85.3609	97.6603	124.173	120.144
86.0294	111.701	153.729	72.3753	71.6744	107.641		102.162	119.468	104.166	31.2202	35.9806	50.9111	109.981	99.2687		77.3375	83.9823	112.666	117.269
85.6906	100.977	141.833	42.9188	100.204	116.084		93.0272	112.024	103.722	47.0975	36.414	55.5195	107.906	139.564		100.371	78.0988	117.545	110.377
85.8859	104.972	140.957	24.8422	87.4221	106.691		91.0567	117.988	86.6298	78.8359	46.8488	54.2428	109.415	106.152		132.313	72.2913	110.403	116.111
87.8375	113.376	123.953	30.7015	97.7115	95.6767		127.667	123.619	86.0806	174.529	54.3939	55.7607	103.599	97.0685		110.732	73.3915	113.192	115.904
102.852	113.838	131.899	62.0144	87.2849	111.631		135.209	122.513	95.776	182.797	53.4397	50.7769	112.589	100.879		98.8144	78.9697	115.658	119.635
96.6771	118.701	133.313	78.9826	80.4999	119.539		138.592	124.465	93.323	180.326	59.5671	58.5815	108.11	88.0025		99.6678	80.2043	114.517	123.498
97.1464	118.703	103.663	63.9891	95.4827	115.427		151.218	115.558	99.6107	154.874	63.8119	54.3774	87.0923	97.9407		97.0391	68.9105	113.493	123.417
92.5393	117.88	116.026	71.6918	82.1342	116.362		137.936	121.41	99.8183	130.199	72.2988	59.3518	72.0161	104.247		102.208	73.1098	109.45	132.401
95.562	119.628	118.742	89.9667	79.329	110.498		137.705	118.6	93.6142	146.806	72.3451	53.476	58.1474	91.8074		101.354	70.4084	113.573	125.39
111.211	113.868	122.396	91.565	80.8551	106.961		128.044	101.061	83.1814	147.923	76.3664	50.7321	48.8088	67.9155		104.873	71.0961	110.121	112.877
110.949	112.954	118.815	85.4738	101.269	110.306		130.601	108.517	76.9638	149.911	78.7367	52.9275	47.5649	60.7756		77.6421	72.1163	111.174	101.552
