# Supplementary material for: Mechanism for differential recruitment of orbitostriatal transmission during actions and outcomes following chronic alcohol exposure
Source: eLife. 2021 Mar 17;10:e67065. doi: 10.7554/eLife.67065 (PMC8016477; doi:10.7554/eLife.67065)
Supplement: Figure 2—source data 1. [file elife-67065-fig2-data1.xlsx]

## Sheet: Sheet1
	E. WIN55212-2															F. WIN55212-2 30-40 min
	Time	Air							CIE							Air	CIE
	2	85.773	100.577	117.452	104.197	90.0342	104.834		105.426	97.3854	127.5	117.139	84.244	89.7362		42.48	72.96
	4	101.117	101.909	118.659	108.728	84.6026	106.784		94.2177	101.933	117.99	107.081	93.0359	99.9955		48.28	38.57
	6	103.11	103.396	91.9983	97.0109	97.8137	95.1131		99.0337	110.697	101.956	92.6567	113.221	115.674		45.16	14.59
	8	117.977	90.3769	88.0842	97.8833	109.671	101.194		90.084	97.1332	79.6602	95.6214	101.985	103.989		43.96	32.61
	10	92.0229	103.742	83.8062	92.1813	117.878	92.0752		111.239	92.8513	72.8945	87.5023	107.514	90.6059		51.24	62.32
	12	88.2663	95.9337	81.5848	80.478	91.1703	97.1943		113.638	99.763	63.8773	55.7683	110.724	76.2254		37.22	61.41
	14	92.7756	111.1	76.5076	66.8817	86.9084	98.9069		121.173	103.45	45.3545	60.6272	103.854	43.8548
	16	95.7881	97.5111	68.481	60.7403	89.6003	99.5359		121.109	103.593	31.8632	54.6135	102.799	54.6387
	18	82.4153	73.9134	83.6535	63.5159	77.3843	90.6912		103.221	93.3228	29.4348	46.8771	93.3309	53.1146
	20	80.7324	77.1901	78.9309	57.7732	92.0505	89.2633		100.257	76.7996	26.5658	52.4578	96.2405	57.1537
	22	69.5671	70.9616	66.0721	57.6882	76.4712	86.0914		100.106	69.4775	22.4804	44.8391	89.722	76.1715
	24	68.5992	64.7519	64.944	61.0492	75.3298	64.4692		96.1953	60.29	22.4317	34.917	88.9362	59.7585
	26	61.0614	60.9835	63.6597	56.0135	82.8248	64.7177		86.3677	57.4618	22.1998	36.0744	85.0733	66.8023
	28	59.1512	51.2854	55.9945	42.0772	58.2102	55.7793		85.3625	49.9823	19.8365	42.9663	75.9463	70.172
	30	57.2363	49.4227	62.2549	37.1748	65.0695	48.773		86.7078	50.8514	17.917	33.3893	70.8933	57.9671
	32	44.5517	50.5898	51.2714	42.2859	44.3765	46.6261		68.288	44.4763	17.6007	34.9345	68.8282	58.9082
	34	48.9833	47.043	46.3427	43.2741	55.8912	45.1044		72.4711	39.1218	14.8727	35.7231	63.1717	57.0811
	36	26.5669	48.9163	51.8883	46.1843	56.7946	40.7787		75.3195	37.7965	14.5913	34.0693	63.3109	63.9444
	38	39.5336	52.3106	39.2245	45.2586	46.319	36.5628		76.7709	35.9285	13.9075	29.6052	61.4218	62.8746
	40	52.7595	42.5477	37.0562	42.7726	52.8276	17.051		71.9419	35.5375	11.956	28.7226	54.862	64.2415
	G. DHPG-LTD														H. DHPG-LTD 30-40 min
	Time	Air							CIE						Air	CIE
	2	122.368	90.8858	112.981	87.388	94.6218	86.0363		110.095	58.8649	106.782	93.4749	93.8624		31.97	40.52
	4	95.6438	97.5048	110.104	102.996	113.911	75.2193		104.075	113.964	93.9594	92.3841	102.364		91.19	33.49
	6	81.9033	108.901	103.923	97.7007	103.304	147.834		93.9816	113.966	116.154	113.498	105.021		46.23	47.01
	8	110.339	104.565	89.2787	102.284	98.7679	80.2073		92.8554	113.814	98.6932	89.4585	92.2519		50.99	63.27
	10	89.7462	98.1434	83.713	109.631	89.3956	110.703		98.9936	99.3908	84.4119	111.184	106.5		44.11	49.11
	12	91.9356	83.4001	81.4919	93.8411	74.9119	122.238		63.3057	62.3488	61.1291	80.9151	93.7061		63.12
	14	60.2234	70.4197	79.9616	96.6327	72.8279	112.088		47.1963	50.8232	59.6798	52.5536	86.7078
	16	57.3358	65.2242	61.2793	78.8604	68.0562	82.4544		53.8807	52.7145	53.8792	67.198	66.541
	18	49.4524	67.6207	69.8051	62.5032	57.3901	74.0205		46.186	43.2359	46.7835	75.3144	61.5627
	20	39.318	67.9615	70.1594	67.8234	58.2579	60.3154		37.7242	43.7424	43.1779	62.2194	58.8633
	22	35.883	89.3499	67.5082	66.5609	64.5772	93.3794		59.6106	50.4808	59.7222	58.2279	50.3666
	24	34.6808	100.943	75.681	57.8473	54.2957	87.1855		45.6478	51.118	59.4394	58.9121	58.9567
	26	28.4281	100.257	61.2828	53.4495	61.5997	77.1396		44.416	44.9909	68.936	66.0611	49.5808
	28	39.5585	86.823	54.658	52.1832	68.4688	82.3046		48.7563	41.1144	70.1474	62.926	54.4584
	30	36.797	97.6391	55.0579	51.8502	43.2654	87.8647		45.9911	38.0371	62.7199	61.1102	56.1248
	32	42.2195	103.244	50.4964	48.5993	55.5575	60.5653		48.4482	33.2989	54.5413	61.5766	54.8933
	34	38.093	92.3149	43.2466	53.3562	52.3595	54.5969		38.7313	39.4787	50.6726	60.4133	46.0609
	36	29.6233	95.4256	42.9775	54.2578	34.6018	74.5989		40.3149	30.0248	46.638	76.7234	47.5966
	38	26.7886	81.5965	46.9157	49.2113	36.4599	59.3109		37.1631	34.9379	43.7046	59.0397	55.8459
	40	23.1256	83.353	47.53	49.5331	41.5671	66.5063		37.9514	29.7316	39.4931	58.5751	41.1396
	I. DHPG-LTD w/ SR141716													J. DHPG-LTD w/ SR141716 30-40 min
	Time	Air					CIE							Air	CIE
	2	99.9262	98.5428	107.583	90.8056		101.496	87.1512	98.2234	101.987	118.431	98.5272		95.74	100.57
	4	89.1348	98.0214	100.386	103.58		104.311	103.198	112.596	102.34	99.7758	97.7284		114.88	88.31
	6	103.939	101.227	91.058	106.291		100.307	105.851	113.581	101.647	94.2004	97.1984		111.23	82.52
	8	101.495	102.969	99.2424	106.827		101.915	98.7833	94.0818	98.4933	100.763	101.652		90.81	123.73
	10	105.505	99.2402	101.73	92.4965		91.9715	105.016	81.5177	95.533	86.8293	104.894			135.77
	12	105.067	98.7785	94.8003	80.7151		101.821	110.314	67.1868	81.4598	110.031	106.026			118.65
	14	98.9712	110.373	100.755	87.5708		92.2778	99.1229	75.9884	98.6892	118.374	82.5038
	16	103.466	114.55	94.1551	83.4347		82.4293	108.855	82.1477	88.8279	111.665	120.572
	18	92.5001	112	97.2771	91.3294		90.2134	106.435	73.2146	75.5089	95.6116	122.591
	20	95.1335	101.861	94.7891	94.7488		79.8356	91.1518	101.112	92.1287	116.501	123.886
	22	99.4549	114.385	98.9561	116.44		85.88	86.264	102.153	88.2272	111.937	124.122
	24	96.1058	116.197	95.6455	129.381		104.316	101.237	85.8396	92.9497	125.746	125.283
	26	105.919	111.692	94.0879	92.7598		98.8518	99.7547	66.8731	100.061	124.827	129.978
	28	107.191	129.172	106.126	110.382		101.232	98.6586	74.0085	121.951	133.518	123.804
	30	96.7373	119.007	111.536	107.412		112.956	84.018	101.326	108.219	131.602	124.278
	32	98.9158	119.571	104.12	104.376		100.373	89.2155	97.0798	117.582	141.149	98.1547
	34	82.7746	103.771	109.995	102.258		102.333	81.3965	71.821	103.139	131.249	127.881
	36	94.3945	117.168	118.105	101.922		103.269	91.1253	85.494	123.347	113.734	129.929
	38	92.1621	121.426	117.27	102.383		96.3697	92.0215	80.475	122.478	139.5
	40	110.452	112.469	106.637	102.017		100.513	87.7803	77.7411	152.109	153.235
	K. DHPG-LTD SKF81297																						L. DHPG-LTD w/ SKF81297 30-40 min
	Time	Air							CIE								CIE w/ SR141716						Air	CIE	CIE w/ SR141716
	2	86.6702	124.584	94.2047	100.328	102.936	135.22		107.337	87.1027	116.49	116.34	102.926	98.301	88.8685		99.1499	77.944	104.183	116.655	97.288		69.46	39.9	94.19
	4	82.4328	115.834	106.128	98.657	100.144	79.2569		97.9885	97.3187	103.877	128.638	97.4444	121.14	85.9389		99.8428	71.079	92.7289	119.962	105.232		102.17	52.28	137.17
	6	122.728	99.0519	91.9738	96.8258	98.9961	96.1188		106.595	103.926	103.859	90.1067	100.844	91.1439	107.657		101.902	96.1035	91.8147	95.3546	112.119		74.57	47.08	125.69
	8	103.483	82.6952	104.463	98.3453	103.183	77.9504		94.9263	105.908	97.0716	87.368	95.1066	95.1155	119.048		99.5345	118.321	94.591	86.2526	101.571		135.74	64.01	86.56
	10	104.686	77.8346	103.231	105.844	94.7411	111.454		91.7838	105.745	78.7025	77.5476	103.679	94.2998	98.4875		99.5713	128.117	116.682	81.7765	83.7898		113.18	77.53	77.58
	12	96.4368	65.637	111.315	105.387	95.5288	102.124		71.1807	104.01	50.5016	72.112	103.004	89.2474	91.2028		99.631	89.3448	114.633	105.2	85.8824		82.8	63.33
	14	99.6462	40.1703	107.718	122.826	85.6296	98.3829		74.6236	83.6321	45.3222	66.7582	88.52	85.4202	73.3923		96.4925	119.194	108.395	77.6229	92.1947			48.74
	16	98.8863	43.8335	94.2693	100.239	79.2148	124.465		69.2626	55.9323	36.8236	68.6933	82.6856	96.4805	60.7889		89.8797	146.43	111.978	69.8552	86.2614
	18	103.569	60.8081	94.681	101.793	82.9367	89.5492		52.5911	59.1176	47.0476	70.6721	76.2583	78.4617	91.1749		84.4368	143.516	109.831	74.4311	72.514
	20	118.535	104.855	88.1412	129.693	76.7556	114.691		65.8709	67.9933	45.4688	92.2889	80.003	77.8957	88.9728		74.0123	152.387	107.193	89.7274	83.0768
	22	97.6015	112.058	88.9869	151.452	80.4862	116.976		60.5845	58.358	67.9246	87.7865	75.1404	70.7561	64.7077		79.8416	144.616	116.904	92.172	84.7243
	24	86.9819	23.2463	94.0616	139.144	74.6875	126.791		49.2345	60.4925	47.3896	69.2156	82.6716	62.6799	90.3492		84.8989	154.825	106.846	101.148	76.3182
	26	112.135	67.1386	88.5624	133.156	70.8015	101.805		50.5662	65.7482	46.2423	82.5188	96.1436	65.9983	72.5898		88.1102	146.709	115.86	97.9679	58.0958
	28	102.48	118.508	79.5639	145.191	78.5408	101.807		41.1809	60.3085	43.7635	70.6489	98.8112	64.1725	101.342		94.7152	163.006	128.886	92.2011	72.7742
	30	82.2237	114.544	71.2104	148.954	83.0866	85.9108		43.8833	48.5226	41.8446	77.0134	86.3582	70.4325	67.2425		91.28	156.322	129.2	86.1394	65.7251
	32	69.7224	97.4256	65.9431	149.721	74.9118	83.8664		41.6963	43.5995	52.7496	67.1645	96.1649	74.2397	66.1434		88.4592	146.866	130.632	88.3295	66.1495
	34	80.1916	94.3517	80.7219	145.39	116.699	74.8215		45.751	49.5203	49.75	68.8632	71.2952	63.1651	56.5381		94.3189	143.22	137.01	83.9434	73.9455
	36	63.9924	121.87	77.8335	147.927	116.053	94.2982		38.2691	45.8302	47.5263	61.3069	74.603	61.9156	49.6519		90.4586	139.033	135.55	89.4728	70.5274
	38	71.322	103.217	69.612	120.634	130.053	72.7851		36.7896	62.5148	39.3694	60.266	77.4215	62.4944	36.2109		100.853	125.457	108.26	89.296	81.0785
	40	62.0902	93.9836	78.76	115.04	128.16	88.2039		36.9741	59.9422	46.0204	62.4549	68.1409	54.8219	35.1791		96.8852	131.288	117.021	81.7807	96.2187
