# Supplementary material for: Mechanism for differential recruitment of orbitostriatal transmission during actions and outcomes following chronic alcohol exposure
Source: eLife. 2021 Mar 17;10:e67065. doi: 10.7554/eLife.67065 (PMC8016477; doi:10.7554/eLife.67065)
Supplement: Figure 3—figure supplement 1—source data 1. [file elife-67065-fig3-figsupp1-data1.xlsx]

## Sheet: Sheet1
Air	CIE
147021	210461
205944	263431
117610	103960
215230	204396
195276	266182
257990	259119
396711
258766
