# Supplementary material for: Mechanism for differential recruitment of orbitostriatal transmission during actions and outcomes following chronic alcohol exposure
Source: eLife. 2021 Mar 17;10:e67065. doi: 10.7554/eLife.67065 (PMC8016477; doi:10.7554/eLife.67065)
Supplement: Figure 3—figure supplement 2—source data 1. [file elife-67065-fig3-figsupp2-data1.xlsx]

## Sheet: Sheet1
C. Air	C. CIE		D. Air	D. CIE
1.25974	1.18206		1.45257	2.0211
1.61938	1.90003		2.61379	1.38169
1.99039	1.07745		2.4417	2.22089
0.940493	1.01602		1.73249	2.32633
	1.21676			2.22902
