# Supplementary material for: Mechanism for differential recruitment of orbitostriatal transmission during actions and outcomes following chronic alcohol exposure
Source: eLife. 2021 Mar 17;10:e67065. doi: 10.7554/eLife.67065 (PMC8016477; doi:10.7554/eLife.67065)
Supplement: Figure 3—source data 1. [file elife-67065-fig3-data1.xlsx]

## Sheet: Sheet1
	Current	A. D1+ Air											A. D1+ Air w/ SKF
	0	0	0	0	0	0	0	0	0	0	0		0	0	0	0	0	0	0	0	0	0
	50	0	0	0	0	0	0	0	0	0	0		0	0	0	0	0	0	0	0	0	0
	100	0	0	0	0	0	0	0	0	0	0		0	0	0	0	0	0	0	0	0	0
	150	0	0	0	0	2	0	0	0	0	0		0	0	0	0	10	0	0	0	0	0
	200	0	0	0	0	11	0	0	0	0	0		0	0	0	0	16	0	0	3	0	0
	250	0	0	0	0	14	0	0	0	0	0		0	0	4	0	23	0	0	16	0	0
	300	0	0	12	0	20	0	0	0	0	0		0	0	15	6	27	0	0	23	0	5
	350	0	0	21	0	25	0	0	11	0	0		0	0	24	17	32	0	7	25	0	12
	400	0	0	29	9	26	0	0	19	0	0		4	0	31	22	35	7	17	26	8	15
	450	10	0	33	17	26	0	3	25	0	7		13	8	32	24	36	14	24	27	16	16
	500	18	8	34	23	26	6	11	28	6	15		20	16	34	23	38	20	28	28	22	17
		B. D1+ CIE											B. D1+ CIE w/ SKF
	0	0	0	0	0	0	0	0	0	0			0	0	0	0	0	0	0	0	0
	50	0	0	0	0	0	0	0	0	0			0	0	0	0	0	0	0	0	0
	100	0	0	0	0	0	0	0	0	0			0	0	0	0	0	0	0	0	0
	150	0	0	0	0	0	0	0	0	0			0	0	0	0	0	0	0	0	0
	200	0	0	0	0	0	0	0	0	0			0	0	0	0	0	0	0	0	0
	250	0	0	0	0	0	0	0	0	0			0	0	0	0	0	0	0	2	0
	300	0	0	0	2	0	0	0	13	0			0	0	0	0	0	0	0	14	0
	350	4	0	13	17	0	0	0	22	0			4	0	5	11	0	0	0	23	8
	400	12	0	21	25	0	4	1	28	0			12	0	15	21	2	2	2	29	17
	450	18	4	26	31	10	13	11	31	13			18	6	20	29	12	12	12	32	23
	500	22	10	29	34	17	19	19	32	18			21	10	25	33	19	19	19	32	27
		D. Rotations/hour					E. Total rotations			F. % cw rotations
		Air cw	Air ccw	CIE cw	CIE ccw		Air	CIE		Air	CIE
		76	0	38	32		76	70		100	54.2857
		39	20	26	48		59	74		66.1017	35.1351
		27	9	13	9		36	22		75	59.0909
		41	12	21	39		53	60		77.3585	35
		44	20	26	27		64	53		68.75	49.0566
		47	20	36	31		67	67		70.1492	53.7313
		45	26				71			63.3803
		49	22				71			69.0141
