# Supplementary material for: Mechanism for differential recruitment of orbitostriatal transmission during actions and outcomes following chronic alcohol exposure
Source: eLife. 2021 Mar 17;10:e67065. doi: 10.7554/eLife.67065 (PMC8016477; doi:10.7554/eLife.67065)
Supplement: Figure 4—figure supplement 1—source data 1. [file elife-67065-fig4-figsupp1-data1.xlsx]

## Sheet: Sheet1
		A. Air										A. CIE									B. Air	B. CIE
		95.8159	94.1625	105.391	104.082	107.305	97.3589	121.852	97.2538			95.8407	112.363	90.6389	91.9596	118.675	99.3131	114.571			28.8644	36.6492
		101.223	112.911	105.261	97.3836	93.6604	102.327	87.6025	92.2278			104.719	96.6899	103.539	98.5485	90.9052	98.6672	101.424			25.7258	18.8062
		104.99	96.6865	88.46	95.5196	101.778	93.9502	95.2322	94.9686			94.1351	95.2181	96.7121	95.3464	87.1831	97.3376	87.8368			37.7964	12.0476
		96.4232	104.037	94.7935	102.328	96.7103	112.481	101.075	111.431			106.903	104.977	106.139	104.9	91.0515	97.5148	80.7889			19.3864	32.9648
		97.5041	96.3498	97.104	104.334	106.021	91.9617	93.7538	103.081			99.0902	108.252	100.585	105.473	111.394	102.77	98.6615			21.0165	31.3389
		104.044	95.8523	108.99	96.3537	94.5247	101.921	100.484	101.038			99.3119	82.5002	102.386	103.772	100.791	104.397	116.718			31.6366	16.0368
		71.1356	74.2742	62.2036	80.6136	78.9835	68.3634	93.8849	88.9043			63.3508	81.1938	87.9524	67.0352	68.6611	83.9632	78.8508			6.11507	21.1492
		69.9468	74.4008	65.5358	97.7888	77.7807	73.7282	90.5396	91.8413			67.1019	91.7304	94.3756	65.9587	87.6243	83.8984	71.602			11.0958
		73.3025	79.5273	51.7896	93.3479	80.6589	69.0715	98.2851	93.141			75.0596	81.8894	91.7149	81.1928	97.2516	77.9049	55.4354
		73.9077	82.7794	62.8524	108.215	94.9761	76.5772	87.534	101.674			79.567	98.7828	96.732	78.6909	90.3178	90.4579	85.2017
		83.3016	78.6872	68.9844	110.327	107.989	68.1454	98.0074	94.6323			84.8788	90.1128	95.4498	74.8547	74.9016	85.381	79.0869
		78.5782	90.0481	66.6445	106.059	93.6004	73.2031	79.4713	93.4341			79.0833	103.552	93.8186	77.4438	81.7092	99.1069	82.0286
		78.0997	81.8322	54.2683	102.9	105.142	77.1849	82.7536	82.3844			80.1111	100.351	88.7356	88.106	87.5011	84.3759	82.2843
		86.9722	83.3512	93.677	115.509	104.244	74.4489	91.2507	98.061			79.8035	93.2437	93.8401	83.5385	96.459	93.0395	90.4606
		88.3935	82.2391	83.2016	105.326	104.578	82.9831	84.901	79.3687			81.3686	101.78	87.603	84.6263	76.6878	83.5729	85.6301
		90.7778	89.4423	87.8938	106.707	102.912	73.2192	89.444	97.7498			81.9157	97.9241	97.1563	85.702	99.2719	89.3715	75.9564
		88.0259	76.2203	82.1853	112.594	106.216	85.7659	94.773	87.1615			79.2005	83.3728	99.3949	89.432	108.431	85.5459	78.2664
		92.1007	88.5801	61.0829	102.523	98.5453	72.0262	81.7218	94.5057			74.9332	95.6146	98.832	81.7067	96.1964	84.1243	76.1155
		85.001	88.8315	49.2167	94.3767	105.986	91.0572	84.4503	81.9628			83.8211	99.2772	94.6376	83.77	89.5939	80.5342	77.6034
		95.3691	91.9284	103.066	104.098	105.278	88.505	85.5731	84.4819			89.6233	92.3649	97.536	90.1754	102.316	90.2136	81.7568
		89.598	89.2289	107.142	116.16	88.3505	77.6772	83.178	89.9686			91.2676	111.904	88.3247	93.7855	110.267	91.6872	89.1733
		90.2954	75.3005	80.0262	109.251	100.818	85.345	83.2457	87.1137			81.9367	103.199	95.8452	87.0529	85.1733	88.1518	100.8
		90.1696	93.9532	74.9289	109.518	96.665	89.6041	90.5935	90.7114			81.0958	103.542	96.3287	91.7898	92.2227	98.3805	89.1351
		92.1782	101.522	65.327	93.7101	113.274	80.1281	81.1432	89.6248			93.405	111.063	96.1642	83.6213	99.1906	88.9519	87.907
		102.384	98.2537	94.3587	96.2991	100.593	79.4328	83.3027	88.6184			81.1459	90.686	106.328	84.308	75.1956	88.8765	97.8455
		94.649	83.8507	81.9496	105.019	99.467	95.0258	88.2725	91.5611			91.1412	88.5691	90.8472	99.6839	108.685	89.9462	69.4877
		89.7952	83.7483	78.2059	99.154	107.918	78.0675	86.8507	87.9768			87.323	94.7185	101.792	79.6666	99.6827	95.0976	106.268
		87.528	86.7006	86.6549	83.1954	103.034	102.388	87.6103	91.5154			87.9371	76.6899	90.4609	84.5404	104.543	87.3985	98.7923
		100.603	85.082	85.9954	101.194	100.986	97.4145	77.1632	88.4132			93.3171	90.4409	84.5269	84.6688	108.979	95.6702	99.4433
		91.8519	83.8894	114.592	90.0034	93.4706	85.0898	75.5304	91.3628			95.7883	112.228	86.8596	89.8766	92.6413	91.6858	104.579
		C. Air						C. CIE										D. Air	D. CIE
		101.616	108.621	100.544	100.734			101.733	100.239	99.8007	107.859	90.2879	98.335	100.636				38.7374	40.555
		105.6	97.4039	90.5797	101.119			102.351	106.922	98.5006	95.2155	108.12	93.7262	97.7573				31.5002	21.6838
		97.0716	96.3302	99.8515	102.334			97.2438	103.499	100.855	76.7222	90.2138	103.476	105.177				25.0743	24.4136
		102.692	103.174	102.788	97.8959			102.419	105.67	105.516	98.1719	100.356	113.745	100.909				32.709	16.6781
		98.6985	101.061	109.839	101.203			99.1837	94.6363	91.9862	101.532	111.311	93.924	94.6034					47.501
		94.3212	93.4108	96.3975	96.7144			97.07	89.0342	103.341	120.499	99.7112	96.7938	100.918					27.7427
		61.2626	68.4998	74.9257	67.291			59.445	78.3162	75.5864	83.3219	52.499	72.2573	64.1472					35.8528
		68.4485	75.946	65.8946	81.9978			87.8564	89.2148	90.7966	92.2019	52.0301	73.5924	89.6154
		77.306	87.5544	76.1303	103.406			100.932	102.418	95.4239	83.6177	89.3837	78.6226	69.3193
		76.1855	103.891	71.7812	90.1801			101.957	92.9881	93.2565	86.2721	87.5475	80.1058	75.0742
		80.5152	130.03	79.4973	96.7347			107.34	107.033	105.528	81.9493	84.4056	84.6822	83.1572
		81.9583	99.2332	69.9394	97.0488			94.9249	98.096	99.3869	83.8163	97.5512	71.843	61.8777
		101.978	103.344	67.472	87.3917			101.688	105.317	100.437	85.2377	99.1333	71.8511	78.6777
		84.6008	102.479	68.0513	97.1447			96.658	95.17	108.193	78.3857	96.5324	89.4549	79.4917
		86.438	110.556	83.7755	87.1256			106.771	96.9725	97.9856	73.9559	85.741	73.5226	73.1954
		93.8244	98.551	89.7335	93.0604			96.6496	98.5883	108.785	71.1929	104.041	94.555	83.7308
		91.8504	102.239	78.9606	90.701			96.3779	100.058	106.832	111.801	87.0923	88.6502	83.2833
		88.9633	97.0966	94.4754	100.875			101.961	100.137	110.402	88.6754	87.9586	76.9414	80.1778
		94.7611	98.0976	100.749	85.5312			105.07	95.5188	109.855	56.9148	76.0021	87.0124	85.3289
		98.5675	96.9618	99.6402	86.9318			99.7675	93.1451	109.544	91.1423	86.5665	89.3707	85.4431
		99.0657	94.1533	79.1217	92.5053			106.783	92.3336	103.638	71.7758	86.3431	100.052	89.8136
		110.117	101.349	82.0308	96.9772			97.603	97.8797	105.208	75.9578	81.92	84.4295	76.8358
		106.578	101.696	79.0046	101.485			92.7447	98.531	93.169	88.1693	83.1459	84.9485	78.1839
		108.37	88.4787	71.7672	86.2118			104.29	100.266	107.77	84.4348	93.1427	97.4112	76.0942
		105.235	96.5548	88.4422	95.9625			98.9158	96.5606	122.654	84.1335	87.5995	101.179	88.6505
		107.845	99.4766	101.432	88.2863			108.883	99.6416	100.596	92.0862	85.4034	92.2795	84.1602
		104.054	96.3724	76.7359	107.579			89.931	89.018	114.553	89.2952	86.604	95.9228	92.6135
		106.246	88.2074	76.7929	88.2683			88.5625	93.0229	105.971	117.445	92.9842	62.7535	72.5999
		103.749	99.175	87.1872	90.0764			103.24	101.106	101.246	92.9896	82.1518	75.322	75.9258
		104.617	75.5689	93.1787	82.791			97.613	101.436	110.216	101.66	91.3798	88.9604	69.3102
		E. Air							E. CIE								F. Air	F. CIE
		103.14	109.539	99.2712	91.8809	95.7435			89.7358	92.8886	97.665	130.16	117.155	71.4946			7.47649	16.1814
		96.9031	102.544	99.293	109.814	103.189			111.202	91.9013	98.3956	91.8065	133.892	75.4792			-2.8376	-17.4224
		101.473	99.2297	94.1665	102.606	103.808			96.745	101.969	109.141	89.8472	50.9855	179.435			-10.4154	3.71869
		102.839	93.7196	112.137	94.6742	100.183			93.2892	105.272	90.5604	86.2627	99.8586	83.1137			-7.3858	-11.5764
		90.5721	92.8603	114.727	100.714	90.6907			105.474	101.412	100.371	92.2702	100.836	118.18			-0.4067	6.86467
		105.072	102.107	80.4056	100.311	106.386			110.217	106.557	103.868	109.653	113.758	82.7414				-8.3794
		76.7766	102.838	110.415	107.386	100.407			83.8186	117.422	96.2813	111.576	93.1353	108.379
		103.174	97.4063	99.8503	98.7859	88.1807			87.1696	75.7508	105.448	97.4845	125.692	142.566
		83.4289	99.5429	95.5877	95.0411	80.5265			101.782	95.1319	110.062	98.9462	93.8021	100.309
		71.7113	92.4766	112.864	88.9972	91.2087			93.9194	100.429	112.597	93.4687	91.6774	68.9006
		93.0251	94.9555	99.4943	112.736	90.7597			77.6346	88.2202	102.309	91.0021	118.512	84.4211
		85.1737	95.0734	103.289	102.118	84.759			83.6315	88.5314	107.959	72.1728	97.9874	126.773
		68.9888	97.7096	130.55	104.252	90.4895			87.994	101.454	101.572	88.9166	100.956	129.962
		82.751	100.752	121.02	106.674	105.234			86.0048	106.219	100.716	104.424	110.646	129.283
		88.0855	88.0079	130.938	112.898	79.6471			86.152	103.965	109.947	61.6034	123.669	119.627
		85.4752	102.601	94.9697	115.557	84.1438			89.359	90.8673	115.978	104.444	86.9017	79.0405
		119.219	102.518	115.827	105.314	85.8074			96.7248	101.087	108.696	72.7761	75.6989	126.572
		118.987	98.5942	129.509	98.0684	88.6552			81.1733	87.2066	106.762	103.095	80.9246	105.597
		111.984	95.6902	116.962	114.191	99.5566			73.4947	90.5328	119.057	120.702	95.4851	132.923
		72.6291	98.5411	118.65	109.17	92.2372			78.2178	80.5084	95.9464	77.6833	81.3913	139.279
		119.012	99.2047	119.429	101.925	92.3723			112.457	107.06	114.582	85.9692	123.673	102.323
		114.582	99.4631	122.381	123.077	81.9459			107.274	88.074	104.547	69.7422	95.2884	130.333
		121.862	100.175	119.251	111.447	90.1018			92.4765	83.4306	105.713	96.2745	50.5694	176.863
		117.374	106.077	115.42	111.284	89.186			77.4114	81.627	114.161	127.055	116.457	104.408
		116.743	93.326	123.576	112.007	96.7258			90.5824	98.773	102.649	122.442	86.6914	176.369
		102.359	104.226	121.553	108.791	87.3027			94.1792	102.445	97.2431	80.8892	89.6059	109.605
		75.2797	94.7496	127.311	112.159	91.4525			85.47	93.4303	105.132	91.7849	104.552	93.8519
		94.3331	99.6062	141.013	113.393	92.6834			86.258	90.7335	114.418	127.422	78.2239	108.071
		102.516	105.343	133.665	114.867	81.7959			76.2485	96.2351	106.192	89.697	49.642	125.651
		82.9551	101.452	102.446	94.8979	97.4023			94.201	93.6938	89.4589	125.692	129.746	97.9937
		G. Air								G. CIE							H. Air	H. CIE
		93.9769	94.4557	100.639	111.563	106.153	100.85			96.7193	102.621	105.113	81.9905	103.483			-2.4999	-0.132
		104.916	99.8813	105.028	95.4118	88.4754	102.175			100.776	99.2778	97.4846	75.2435	107.362			9.83553	-6.0703
		104.058	110.107	91.4857	96.4671	92.9735	105.025			99.3353	100.732	104.877	140.178	100.12			1.90816	-7.3753
		98.6625	101.238	101.312	100.224	110.848	96.5782			101.048	102.191	88.5079	102.102	100.387			17.1622	-7.7549
		91.2548	105.533	92.3105	98.2619	104.508	100.414			99.0997	91.4718	108.579	108.773	103.572			-17.7596	1.50774
		107.132	88.7851	109.224	98.0719	97.0425	94.957			103.022	103.706	95.4385	91.7132	85.0754			5.7513
		102.5	90.1645	98.0918	77.2032	117.76	94.2487			100.132	106.07	107.375	115.39	98.4923
		117.195	89.3313	125.97	77.2797	105.192	98.7816			108.056	106.935	111.115	92.9711	103.181
		104.699	93.9138	93.7395	88.1323	89.2777	103.443			102.052	93.3523	94.3426	114.243	82.1745
		100.944	86.2592	103.952	97.6953	109.292	93.2328			109.919	94.2338	104.123	57.8505	97.8749
		95.7993	90.631	117.219	103.278	115.504	103.212			105.297	100.015	106.078	92.0744	95.5374
		102.555	99.0268	99.5795	87.9135	112.868	107.823			102.141	95.3293	99.2267	83.2577	86.3586
		96.1084	103.466	100.507	96.7445	93.8061	97.2849			99.2485	91.3686	100.511	145.906	93.6556
		101.847	95.4626	83.3674	88.3928	99.5593	97.0112			106.181	96.3394	94.7805	92.8816	81.3781
		104.113	97.9522	92.0339	94.3484	89.318	94.0079			104.487	100.512	96.2328	59.7211	80.7957
		91.0722	95.6093	92.694	95.421	92.3077	94.9608			99.2458	92.9533	100.783	67.615	89.6234
		94.8262	93.328	103.906	91.9259	101.77	100.812			98.8286	98.2989	103.532	104.001	75.0122
		107.288	99.0949	110.772	89.8733	86.8702	95.5749			112.067	94.0361	91.7528	70.6367	84.1198
		81.2749	93.2575	110.818	84.3753	88.6563	100.282			101.508	98.8892	96.561	96.1894	92.5812
		98.2235	111.856	121.907	91.4796	94.4037	94.6636			102.679	91.3966	97.8027	101.901	104.074
		112.95	96.4866	105.224	89.1539	76.6285	110.023			104.48	84.285	101.315	87.5549	88.7693
		94.6559	95.753	106.968	84.1514	72.2223	98.3585			101.633	91.9033	89.4969	118.774	96.0088
		102.344	106.818	86.9869	91.0584	71.3275	101.765			106.353	99.9543	105.705	104.123	100.81
		94.6602	92.5337	114.143	92.9441	73.8955	103.628			104.743	94.102	96.0426	88.594	104.61
		94.5216	102.361	93.1626	94.668	81.1006	90.7757			101.054	92.2625	87.5532	119.333	90.2173
		93.4698	87.4076	107.357	100.648	78.0923	96.666			98.8547	94.9525	96.4174	80.4779	81.7655
		90.4153	95.4665	95.2429	95.2646	72.2306	102.511			101.237	90.2571	94.4551	76.9571	112.431
		88.3676	102.218	106.144	97.3747	71.6244	100.069			99.2935	92.3254	92.538	100.031	96.3258
		95.3214	87.55	103.917	87.7792	81.025	96.6438			102.105	89.9173	86.5908	88.6305	92.2331
		80.9678	89.9334	105.175	86.7578	70.1816	97.6246			93.0112	99.4429	95.4421	48.5894	88.5463
