# Supplementary material for: Mechanism for differential recruitment of orbitostriatal transmission during actions and outcomes following chronic alcohol exposure
Source: eLife. 2021 Mar 17;10:e67065. doi: 10.7554/eLife.67065 (PMC8016477; doi:10.7554/eLife.67065)
Supplement: Figure 4—figure supplement 2—source data 1. [file elife-67065-fig4-figsupp2-data1.xlsx]

## Sheet: Sheet1
B.			C.			D.
X	Y		X	Y		X	Y
21	39.9		6	95.4545		5	53.7223
21	52.28		6	100		5	35.7927
21	47.08		6	86.2069		5	45.5147
15	64.01		17	97.0588		5	51.5676
15	77.53		17	111.765		6	35.7077
6	63.33		17	100		7	36.405
19	48.74		18	100		7	35.9179
			18	100		17	50.9905
			19	150		17	33.2922
