# Supplementary material for: Mechanism for differential recruitment of orbitostriatal transmission during actions and outcomes following chronic alcohol exposure
Source: eLife. 2021 Mar 17;10:e67065. doi: 10.7554/eLife.67065 (PMC8016477; doi:10.7554/eLife.67065)
Supplement: Figure 4—source data 1. [file elife-67065-fig4-data1.xlsx]

## Sheet: Sheet1
		B. DSE opto
	Time (s)	Air									CIE											C. Air	C. CIE
	5	99.9241	98.9946	101.666	87.3473	97.9304	101.847	106.599	100.79		106.136	98.3636	98.9027	106.654	98.6394	106.151	94.1918	85.6383	95.0907			36.0653	53.7223
	10	100.106	100.092	99.0471	105.335	92.7377	89.5905	97.5746	96.3702		103.119	101.048	101.84	84.4345	81.8331	101.427	95.8025	116.757	111.684			17.9879	35.7927
	15	99.4187	98.6617	110.194	107.169	110.471	106.902	100.771	102.93		100.701	82.2475	96.1707	99.7462	99.6312	82.7138	85.2435	95.5117	106.122			13.7428	45.5147
	20	99.6205	98.9366	94.4917	104.832	92.3086	106.114	94.1473	101.13		97.7597	105.632	101.632	105.638	102.21	111.757	114.106	96.3988	99.0889			34.6331	51.5676
	25	101.336	101.993	98.8715	100.653	100.336	102.615	97.7625	93.9297		90.3617	99.5386	96.8344	94.1005	110.928	95.3857	99.1172	100.785	93.6539			28.2716	35.7077
	30	99.5946	101.322	95.7302	94.6638	106.216	92.9311	103.145	104.85		97.9849	111.08	104.621	109.426	106.758	102.565	123.546	104.91	94.36			41.2107	36.405
	40	63.9347	82.0121	86.2572	65.3669	71.7284	58.7893	86.985	78.6542		46.2777	64.2073	54.4853	48.4324	64.2923	63.595	64.0821	49.0095	66.7078			13.015	35.9179
	45	78.4387	93.1251	96.3345	81.9396	70.9478	59.6536	93.3348	82.8791		51.963	74.0327	60.3827	47.3934	67.9076	67.6189	94.1446	96.6896	71.0901			21.3458	50.9905
	50	86.7401	92.9841	91.2255	88.8394	86.7222	80.7821	82.707	92.5102		57.9664	78.1026	68.4011	54.4069	71.4317	92.6517	75.1357	106.659	81.3255				33.2922
	55	90.2882	95.6907	92.5209	94.7434	80.5016	66.8899	94.2602	86.5005		57.7299	67.1917	71.7045	62.746	80.2982	106.808	104.256	101.656	116.401
	60	91.0115	92.0782	91.5979	85.2561	79.5638	83.3229	93.2845	83.2678		78.7724	75.9629	55.5749	81.2347	79.0626	93.0991	101.453	93.4965	102.612
	65	93.0491	101.115	96.0803	85.1546	82.7206	75.5767	96.1959	99.5879		69.3796	70.4953	90.003	59.7568	81.4139	103.015	92.6582	74.0368	99.4409
	70	94.032	103.559	91.3681	90.2907	98.4808	76.2394	105.29	91.4063		77.0682	88.821	82.6436	55.8508	75.4065	98.3584	122.874	95.4805	114.593
	75	94.3865	102.495	89.0255	83.8734	98.6512	63.5223	108.363	80.3299		75.3457	82.9839	97.2933	78.5256	94.1729	93.7414	85.4774	91.3176	103.331
	80	93.2609	101.409	89.7916	104.597	90.1543	84.238	111.467	85.4409		73.5434	101.866	91.2487	78.28	82.6162	93.5299	71.698	94.8992	90.4214
	85	92.7518	99.0318	98.219	78.3203	101.292	91.3469	103.34	84.528		77.5789	85.9112	77.6984	87.4414	82.8885	92.7781	98.446	127.923	98.9073
	90	93.9856	96.3372	95.8495	99.1993	114.241	90.2897	103.661	88.3639		72.1441	97.3425	92.8841	76.6583	93.9269	92.0804	90.8806	101.702	93.7471
	95	94.0772	99.0675	96.3427	87.091	106.057	92.7156	111.136	89.8577		75.0763	89.9523	86.0058	100.117	88.971	97.1089	115.918	106.28	101.962
	100	93.0958	101.854	94.2035	92.716	94.1135	87.9844	111.831	82.9447		73.5322	75.8953	83.2406	97.8841	101.18	82.1087	83.0611	118.332	87.4996
	105	96.9342	95.2763	94.8597	101.706	92.3399	63.3777	101.888	96.4016		70.4501	90.3367	96.2143	94.6579	89.204	96.2861	73.4133	81.1007	79.9518
	110	95.2481	98.5987	98.2594	88.3569	102.03	86.0047	111.909	100.811		78.7998	65.602	93.1227	103.696	102.21	100.681	98.2696	122.471	87.8868
	115	94.6532	98.9542	96.2509	87.3699	85.6877	86.0947	105.208	97.1609		83.2069	91.7357	91.0674	69.6088	95.7652	93.3225	95.9041	107.652	84.2373
	120	94.7836	95.3062	102.051	93.463	86.3698	76.7169	111.728	104.696		93.6026	88.3436	97.0246	95.1315	96.8427	85.3709	91.0887	99.6449	113.935
	125	93.7327	99.0065	97.5688	97.4756	94.5691	60.3077	107.948	95.8263		82.8606	102.017	98.5426	93.6047	111.113	93.1837	97.1237	88.5926	99.1462
	130	95.4376	96.0756	103.62	96.3081	101.638	82.989	106.201	88.8533		86.0134	99.3142	100.365	67.5605	94.0355	101.474	104.318	105.31	82.4099
	135	94.4461	93.6185	97.0776	78.0776	95.0966	88.7077	110.683	79.9336		80.2089	95.46	92.1832	76.0256	89.909	105.583	70.1951	117.652	97.2254
	140	94.9064	89.6762	102.519	87.7075	101.797	93.8392	107.3	88.4546		86.9947	87.0153	90.1789	70.9309	100.316	96.39	94.8586	91.9471	101.03
	145	94.4797	95.7295	93.9259	90.6572	97.623	82.8832	111.853	90.9554		91.2319	89.2566	85.6544	92.2041	93.4446	96.0816	101.16	105.466	85.682
	150	97.9518	88.1053	92.8512	91.8873	86.3728	68.5986	105.829	86.257		87.0324	84.9756	100.622	105.087	123.646	95.9809	87.1607	105.779	97.7373
	155	94.7971	90.3198	99.5291	95.5026	109.601	78.9537	103.666	82.3508		87.6798	93.2157	83.4049	94.0184	104.657	106.805	97.1853	108.351	89.4348
		E. DSE electrical
	Time (s)	Air							CIE								F. Air	F. CIE
	5	105.158	88.9116	98.2154	87.678	102.255	107.925		93.6991	98.8567	95.7484	110.309	102.915	99.3925			29.225	56.34
	10	95.4195	97.7154	94.3431	101.295	89.7736	86.8603		105.459	101.208	94.7951	102.072	109.469	100.066			35.5563	33.747
	15	114.238	104.161	104.389	97.0427	99.1831	97.7419		99.0617	93.4488	100.419	94.2545	93.8644	86.6233			39.6828	53.5242
	20	84.1567	90.9041	102.983	110.257	102.506	104.314		101.586	107.737	99.5155	110.894	93.637	105.248			37.8361	32.3953
	25	98.2238	107.202	106.69	107.266	99.9932	99.4462		95.9282	101.099	102.419	89.2468	102.495	101.753			33.4773	36.1022
	30	102.804	113.88	93.3808	96.4604	106.289	103.713		104.266	97.6507	107.103	93.2242	97.6197	106.916			26.7945	8.93594
	40	70.775	64.4437	60.3172	62.1639	66.5227	73.2055		43.66	66.253	46.4758	67.6047	63.8978	91.0641
	45	77.0218	76.0451	60.4254	77.0732	72.7377	82.5589		80.1659	64.0614	56.9712	67.8476	70.9987	86.4204
	50	87.8684	75.6336	77.6884	80.4146	83.6886	76.8046		66.5182	68.0942	64.1867	83.5042	80.2039	92.1245
	55	86.8597	81.8273	87.7074	76.2043	83.8127	80.745		72.6997	75.5727	64.3152	80.7982	84.8531	84.3933
	60	92.9203	91.5022	87.194	83.3192	77.0135	87.4979		81.2287	82.1438	73.6976	93.771	83.7417	88.4402
	65	98.5829	83.0668	84.611	75.194	85.4626	80.4893		68.1025	82.9453	71.9092	81.6398	79.1198	78.2592
	70	94.3286	105.707	81.0303	83.3215	92.074	97.1376		72.571	78.5439	78.7059	77.5373	72.3153	82.0921
	75	92.3507	91.5115	82.0926	98.9293	94.3623	85.9927		93.3426	83.9398	80.7371	83.3406	80.3683	90.2784
	80	105.022	90.3262	89.7999	75.1093	84.5394	86.5174		92.9056	80.8917	81.1031	103.379	87.6424	68.53
	85	100.049	96.4495	98.9164	90.4261	93.7726	87.7532		84.2641	76.6457	80.1002	96.5095	94.6341	85.6152
	90	94.9354	80.5366	82.0038	87.775	77.8908	84.7454		87.8872	84.1906	82.0459	102.788	92.2495	72.3734
	95	86.2662	99.8983	98.2387	89.4497	91.1911	90.9594		76.4625	76.3045	86.5779	93.827	91.5771	75.9885
	100	106.658	99.1777	85.3051	92.3447	90.0099	92.1381		89.5073	84.8261	82.2162	106.042	90.2608	82.2473
	105	103.748	90.6322	93.2499	78.4436	94.3933	101.091		85.5122	89.5002	95.2475	104.315	86.7432	75.3017
	110	100.151	101.005	89.807	85.5652	93.35	91.0806		108.02	77.5854	92.4735	102.618	97.3551	66.4472
	115	103.354	98.2943	82.6686	92.1594	93.1746	94.9626		99.1151	82.0827	90.1455	101.246	98.5435	70.8153
	120	102.469	101.905	91.3946	80.574	87.7385	94.4999		96.7965	88.7083	81.5785	101.707	107.691	80.431
	125	100.22	104.463	97.3453	94.4302	90.4247	96.3222		105.004	81.3942	101.13	104.169	100.995	74.3055
	130	101.392	111.131	96.7471	82.0102	106.71	92.3525		85.1922	76.6089	92.5607	119.888	105.531	81.4807
	135	107.406	111.111	92.5613	91.6508	85.4844	93.1349		92.883	87.0957	90.6172	96.5523	98.6202	67.3709
	140	104.079	102.454	91.2767	99.3556	95.8035	98.0909		90.8775	95.2971	101.765	117.968	102.811	71.516
	145	106.787	97.6177	84.0773	95.1178	90.8152	87.9772		97.5529	82.4367	98.1815	89.9287	110.682	76.8018
	150	94.3522	112.978	105.087	86.5969	90.8018	93.1166		88.8231	85.2278	99.5365	102.34	114.275	78.1236
	155	107.327	100.18	100.591	99.6997	93.9141	97.3468		107.162	88.1822	89.3702	106.354	107.246	65.9794
