# Supplementary material for: Mechanism for differential recruitment of orbitostriatal transmission during actions and outcomes following chronic alcohol exposure
Source: eLife. 2021 Mar 17;10:e67065. doi: 10.7554/eLife.67065 (PMC8016477; doi:10.7554/eLife.67065)
Supplement: Figure 5—figure supplement 1—source data 1. [file elife-67065-fig5-figsupp1-data1.xlsx]

## Sheet: Sheet1
	B. Air													B. CIE
	15	272	270	242	322	60	358	451	47	242				46	7	294	288	318	278	213	159	269	273	291	188
	333	304	276	204	140	30	20	265	30	25				156	5	108	199	356	29	131	79	243	92	302	183
	410	557	122	230	180	118	254	593	89	236				590	58	533	555	370	277	264	35	108	392	574	323
	399	517	216	233	406	143	701	568	249	334				135	10	586	660	808	288	126	52	393	229	716	514
	728	489	461	113	349	164	570	468	403	277				274	18	539	730	555	458	465	35	436	441	686	576
	473	105	593	172	486	275	705	603	642	568				485	54	379	659	545	729	234	223	578	662	554	538
			444	294	826	175	487	754	310	257						572	575	523	283	368	652	341	252	228	327
		636	536	234	370	215	521	651	554	391					53	399	656	725	601	381	460	516	487	563	584
		233	306	215	212	138	714	720	338	604					82	629	565	444	644	296	483	488	623	356	1019
	C. Air													C. CIE
	1.06825	0.70588	0.10741	0.33784	0.50167	0.15491	0.45732	0.1827	0.746	0.06667				0.53019	0.29557	0.44978	0.11025	1.07692	0.29091	0.42076	0.12782	0.54217	0.42726	0.30303	0.05
	0.433944	0.166667	0.269461	0.287265	0.766773	0.183333	0.133333	0.310881	0.632911	0.468979				1.31579	0.668151	0.889328	0.711462	0.456853	0.288983	0.066667	0.717131	0.216667	0.133333	0.902708	0.365854
	0.0666667	0.383333	0.85282	0.666428	1.38428	0.2	0.641379	0.83682	0.577999	0.566394				0.74579	0.35	1.45513	1.84049	1.40845	0.773861	0.644491	0.949949	1.91045	0.83935	2.1102	2.12264
	0.25	5.3649	7.9961	4.0333	6.3365	1	9.8262	8.0945	0.7833	4.0333				0.7667	0.1167	15.406	10.8	15.576	4.6333	2.3667	2.65	7.1543	4.55	8.0535	6.2982
	5.55	5.8015	4.6	3.4	2.3333	0.5	0.3333	4.4167	0.5	0.4167				2.6	0.0833	1.8	3.3167	5.9333	0.4833	2.1833	1.3167	4.05	1.5333	5.8603	3.05
	6.8333	10.427	2.0333	3.8333	3	1.9667	4.2333	10.555	1.4833	3.9333				10.258	0.9667	9.6587	9.25	6.1667	4.6167	4.4	0.5833	1.8	6.5333	17.177	5.3833
	6.65	8.6167	3.6	3.8833	6.7667	2.3833	11.683	12.397	4.15	5.5667				2.25	0.1667	9.7667	14.738	14.736	4.8	2.1	0.8667	6.55	3.8167	27.155	8.5667
	12.1333	12.139	7.68333	1.88333	5.81667	2.73333	10.5458	7.8	6.71667	4.61667				4.56667	0.34297	8.98333	15.0464	14.0329	7.73867	7.75	0.58333	10.1435	7.35	16.9592	9.6
	7.88333	1.75	9.88333	2.86667	8.1	4.58333	15.0964	13.2917	11.0817	9.46667				8.08333	0.9	6.31667	22.0524	15.6011	17.5381	3.9	3.71667	18.2815	11.0333	26.2352	18.4986
			7.4	4.9	15.654	2.9167	8.1167	12.567	7.0696	6.248						14.438	10.606	10.401	4.7167	6.1333	10.867	17.714	9.6799	12.042	8.963
		12.3535	8.93333	3.9	6.16667	3.58333	13.3704	11.4849	9.23333	6.51667					0.883333	12.6066	19.9898	20.4802	17.3951	6.35	9.34643	12.0233	8.11667	9.38333	14.1576
		3.88333	5.1	3.58333	3.53333	2.3	13.8686	14.1965	5.63333	10.0667					1.36667	15.1932	9.41667	7.4	10.8509	4.93333	11.8479	17.491	11.0526	5.93333	20.1251
	D. Air													D. CIE
	5	5	5	5	5	6	5	5	6	4				5	5	5	5	7	8	5	5	6	7	5	3
	15	10	15	15	16	11	8	17	15	16				15	15	15	15	15	16	4	15	13	8	15	15
	4	23	31	31	31	12	31	30	31	30				31	21	30	30	30	30	31	30	31	31	30	30
	15	30	30	20	30	5	30	30	7	21				46	1	30	30	30	24	24	20	30	27	30	30
	23	30	19	16	14	2	3	27	3	3				18	0	6	25	23	6	11	5	19	7	30	19
	23	30	4	16	9	3	19	30	5	15				30	2	30	26	23	10	16	0	3	18	30	21
	20	13	11	4	20	9	27	30	16	11				9	2	29	30	30	18	7	1	24	8	30	20
	26	30	26	8	15	9	30	21	20	15				17	1	23	30	30	30	22	3	30	29	30	25
	19	6	27	7	29	13	31	30	31	25				20	2	19	30	30	30	12	11	30	29	30	30
			25	18	30	10	27	29	30	30						31	30	30	18	23	25	30	30	30	30
		30	23	10	19	1	32	30	22	15					2	30	30	30	30	23	30	30	26	22	30
		12	18	5	8	6	30	30	21	29					10	31	29	26	30	17	30	30	30	13	30
	E. Air													E. CIE
	12	51	297	0	75	28	12	156	3	2				215	167	140	747	128	22	71	24	106	89	0	1
	101	705	442	223	222	519	567	502	3	13				130	216	212	253	388	595	214	130	717	491	113	327
	263	489	161	547	266	498	343	161	16	513				181	83	164	134	281	426	245	170	139	248	126	115
	136	289	387	479	460	425	252	474	554	513				346	207	166	242	138	532	264	458	375	461	364	219
	138	234	215	369	411	257	232	551	292	172				326	158	223	665	646	350	448	185	201	164	389	615
	130	289	808	363	166	182	505	289	453	186				375	309	384	361	457	265	449	107	175	139	184	649
	345	176	426	363	488	265	213	205	439	119				275	672	262	197	194	267	132	136	110	76	104	346
	61	105	235	433	374	143	154	265	131	223				587	201	254	130	172	309	175	54	142	123	84	426
	247	137	199	354	242	62	199	113	117	459				243	467	232	117	70	197	218	68	92	149	66	172
			252	309	394	180	244	274	116	200						168	179	162	357	221	342	71	82	62	69
		251	120	427	127	63	132	180	103	100					325	148	163	69	174	208	345	102	104	120	80
		292	160	135	32	144	115	94	122	162					164	126	83	137	178	203	131	100	92	36	142
	F. Air		F. CIE				G. Air		G. CIE				H. Air		H. CIE				I. Air		I. CIE
	Vehicle	SR141716	Vehicle	SR141716			Vehicle	SR141716	Vehicle	SR141716			Vehicle	SR141716	Vehicle	SR141716			Vehicle	SR141716	Vehicle	SR141716
	636	233	53	82			12.3535	3.88333	0.883333	1.36667			30	12	2	10			251	292	325	164
	536	306	399	629			8.93333	5.1	12.6066	15.1932			23	18	30	31			120	160	148	126
	234	215	656	565			3.9	3.58333	19.9898	9.41667			10	5	30	29			427	135	163	83
	370	212	725	444			6.16667	3.53333	20.4802	7.4			19	8	30	26			127	32	69	137
	215	138	601	644			3.58333	2.3	17.3951	10.8509			1	6	30	30			63	144	174	178
	521	714	381	296			13.3704	13.8686	6.35	4.93333			32	30	23	17			132	115	208	203
	651	720	460	483			11.4849	14.1965	9.34643	11.8479			30	30	30	30			180	94	345	131
	554	338	516	488			9.23333	5.63333	12.0233	17.491			22	21	30	30			103	122	102	100
	391	604	487	623			6.51667	10.0667	8.11667	11.0526			15	29	26	30			100	162	104	92
			563	356					9.38333	5.93333					22	13					120	36
			584	1019					14.1576	20.1251					30	30					80	142
