# Supplementary material for: Mechanism for differential recruitment of orbitostriatal transmission during actions and outcomes following chronic alcohol exposure
Source: eLife. 2021 Mar 17;10:e67065. doi: 10.7554/eLife.67065 (PMC8016477; doi:10.7554/eLife.67065)
Supplement: Figure 5—figure supplement 2—source data 1. [file elife-67065-fig5-figsupp2-data1.xlsx]

## Sheet: A-Veh
0.0792948	0.0112567	-0.0171638	0.0111001	0.0728329	0.246091	0.477563	0.728158	0.940821	1.05735	1.04559	0.962546	0.863199	0.855065	0.916404	1.04218	1.15678	1.23888	1.31382	1.39029	1.42554	1.41124	1.37377	1.29692	1.22569	1.14957	1.10582	1.10293	1.17261	1.25569	1.34285	1.36338	1.36927	1.37292	1.37134	1.37764	1.30901	1.15137	0.915137	0.709014	0.615242	0.641987	0.741515	0.880616	0.996578	1.06314	1.0345	0.89831	0.770508	0.665068
0.490529	0.354252	0.167684	0.0274468	-0.0819993	-0.0618966	0.115194	0.403924	0.748896	0.968477	1.00589	0.871883	0.667418	0.538832	0.541652	0.631817	0.662906	0.584116	0.411331	0.249305	0.16306	0.115334	0.0969583	-0.0234298	-0.199442	-0.415839	-0.56646	-0.664602	-0.600018	-0.375051	-0.131974	0.0356599	0.0419577	-0.0775332	-0.197147	-0.212397	-0.146748	-0.0524948	-0.0528909	-0.101337	-0.131895	-0.125379	-0.129342	-0.143447	-0.211764	-0.244878	-0.203218	-0.159661	-0.134755	-0.18233
-0.00260535	-0.140584	-0.256091	-0.380975	-0.439469	-0.408688	-0.365761	-0.341215	-0.388102	-0.398987	-0.348035	-0.222252	-0.0734443	0.0681505	0.112463	0.133292	0.228351	0.332003	0.418575	0.389135	0.247752	0.040312	-0.145631	-0.29418	-0.364939	-0.340809	-0.236466	-0.0949509	0.067709	0.201013	0.322238	0.476042	0.573816	0.556423	0.392865	0.0543182	-0.362645	-0.726656	-0.990536	-1.10091	-1.05398	-0.951131	-0.811841	-0.729451	-0.649907	-0.524394	-0.387195	-0.255731	-0.169537	-0.14176
0.0907901	0.119545	0.20945	0.27108	0.318931	0.372965	0.41695	0.419398	0.460469	0.58964	0.713307	0.811168	0.783552	0.67144	0.529708	0.36391	0.221963	0.0599538	-0.106048	-0.249094	-0.316596	-0.282698	-0.200803	-0.152171	-0.120577	-0.0536512	0.0733578	0.270704	0.433138	0.526167	0.533921	0.440682	0.344487	0.257402	0.208843	0.162051	0.111472	0.0780659	0.0772616	0.129442	0.202335	0.310943	0.403296	0.478073	0.54975	0.592276	0.614829	0.615455	0.57015	0.418149
-0.122594	-0.131741	-0.18868	-0.311918	-0.499098	-0.671898	-0.713576	-0.66144	-0.514768	-0.259194	0.0162906	0.297832	0.562998	0.739161	0.787286	0.715502	0.54204	0.361422	0.294566	0.356624	0.521585	0.729971	0.969561	1.17979	1.26513	1.19416	0.968183	0.686905	0.390181	0.184587	0.0136769	-0.0730025	-0.107317	-0.0984265	-0.101341	-0.142556	-0.239246	-0.314552	-0.298272	-0.249788	-0.183771	-0.114853	-0.0445155	0.0397137	0.11517	0.203599	0.236624	0.143544	-0.0576751	-0.275821
-0.45432	-0.259982	-0.107875	-0.0446695	-0.0304812	-0.02579	0.00785638	0.0359814	0.0568384	0.0379308	-0.0520268	-0.264429	-0.560189	-0.846777	-1.02789	-1.00859	-0.85664	-0.693918	-0.642873	-0.714344	-0.855459	-0.988005	-1.10571	-1.19921	-1.2029	-1.16838	-1.1824	-1.34857	-1.6032	-1.86918	-1.98955	-1.92153	-1.68341	-1.41158	-1.25307	-1.19558	-1.26978	-1.47732	-1.67817	-1.79356	-1.80409	-1.69083	-1.60049	-1.55216	-1.53778	-1.54514	-1.55919	-1.54401	-1.55967	-1.51746
-0.572067	-0.62175	-0.609665	-0.532722	-0.379158	-0.192803	-0.0365766	0.0357015	0.0580069	0.0459805	0.0428253	0.0784819	0.092681	0.0536087	-0.0683797	-0.229911	-0.395487	-0.513636	-0.542047	-0.517132	-0.429043	-0.312269	-0.175781	0.0431929	0.240023	0.343026	0.314727	0.216937	0.11069	0.0384422	0.0102149	0.0140683	0.0613448	0.0801354	0.0946624	0.140748	0.22258	0.330595	0.366722	0.289213	0.0984565	-0.153908	-0.379664	-0.534939	-0.491379	-0.315255	-0.0764764	0.146267	0.229996	0.198767
1.18879	1.05176	0.86523	0.660985	0.44355	0.211237	0.0457227	-0.0534898	-0.0831595	-0.0420262	0.00991662	0.0296324	0.00469806	-0.0787581	-0.162305	-0.220772	-0.281486	-0.268289	-0.240009	-0.262909	-0.366672	-0.523639	-0.681349	-0.737931	-0.680382	-0.487909	-0.238698	0.0197292	0.241604	0.374821	0.432341	0.454287	0.437693	0.396365	0.406629	0.452657	0.476754	0.403494	0.264687	0.117456	-0.00910467	-0.0855493	-0.0969702	-0.00615787	0.110674	0.219513	0.281918	0.246979	0.0983647	-0.153336
-0.0997642	-0.106818	-0.0743266	0.0437363	0.177133	0.297521	0.366594	0.327922	0.163426	-0.115172	-0.424519	-0.709982	-0.817919	-0.73283	-0.517809	-0.309257	-0.147762	-0.0197747	0.0809741	0.159606	0.19403	0.22574	0.265849	0.290969	0.353661	0.399721	0.400622	0.320975	0.215277	0.146064	0.103144	0.0139894	-0.154548	-0.378563	-0.594413	-0.755444	-0.886631	-1.01347	-1.09456	-1.20816	-1.2776	-1.3098	-1.3017	-1.24639	-1.14919	-0.981886	-0.732296	-0.441364	-0.22047	-0.151193
1.0278	0.980902	0.905623	0.744341	0.575773	0.413016	0.361083	0.490894	0.765055	1.05964	1.32188	1.46171	1.43506	1.2537	0.920464	0.589562	0.387747	0.415549	0.644062	0.939235	1.16343	1.28608	1.28829	1.20636	1.093	0.950038	0.831105	0.752703	0.695292	0.687589	0.747113	0.858342	0.937729	0.959508	0.912543	0.781568	0.5912	0.37488	0.206829	0.0595392	-0.0334412	-0.0782234	-0.0205364	0.0349974	0.10596	0.137177	0.145363	0.170962	0.263884	0.420107
0.623386	0.476077	0.318645	0.164932	0.023023	-0.119474	-0.25733	-0.34751	-0.39184	-0.349643	-0.270893	-0.140446	0.0443728	0.230995	0.417225	0.593966	0.696545	0.739839	0.697015	0.596065	0.567029	0.608994	0.701252	0.761593	0.762335	0.763541	0.763943	0.738269	0.653424	0.500785	0.334294	0.260829	0.238914	0.2295	0.191259	0.108325	0.0319233	-0.0558429	-0.102347	-0.14275	-0.210215	-0.261842	-0.266114	-0.13971	0.0130949	0.123902	0.142916	0.0952979	0.0234771	-0.0653579
-0.560957	-0.507965	-0.419613	-0.331071	-0.211237	-0.127269	-0.0577697	0.00919859	0.0255522	-0.0174493	-0.080092	-0.158823	-0.191698	-0.211091	-0.244714	-0.296546	-0.352121	-0.402834	-0.433341	-0.460899	-0.495858	-0.545493	-0.569898	-0.549956	-0.549495	-0.556235	-0.574052	-0.57252	-0.603118	-0.672566	-0.809494	-0.912681	-0.980265	-0.957938	-0.854032	-0.714178	-0.583818	-0.533049	-0.572601	-0.725176	-0.955508	-1.18039	-1.37254	-1.47359	-1.45074	-1.27635	-1.02339	-0.812286	-0.729258	-0.803104
0.0487096	-0.0715378	-0.181337	-0.230635	-0.225416	-0.196811	-0.177619	-0.148867	-0.140719	-0.109043	-0.0542212	-0.0274254	-0.0756923	-0.202166	-0.279083	-0.295099	-0.219507	-0.159345	-0.162325	-0.225168	-0.287855	-0.31337	-0.328299	-0.351439	-0.331425	-0.26695	-0.248339	-0.247128	-0.223002	-0.119744	0.0965602	0.384284	0.544414	0.519108	0.336701	0.105052	-0.106676	-0.254897	-0.323416	-0.355458	-0.415956	-0.474507	-0.497438	-0.418735	-0.262753	-0.0558113	0.153704	0.37067	0.617812	0.88694
-0.730988	-0.694383	-0.603456	-0.400438	-0.102814	0.219554	0.470801	0.562429	0.462418	0.359372	0.369506	0.443108	0.484307	0.444358	0.31057	0.0819484	-0.0863188	-0.146159	-0.107878	-0.0657822	-0.0948595	-0.194533	-0.346187	-0.517764	-0.603949	-0.451881	-0.1589	0.137652	0.283221	0.30197	0.233737	0.161967	0.105491	0.0830054	0.0362428	-0.0127459	0.152912	0.485575	0.862139	1.08654	1.0615	0.807557	0.521871	0.366109	0.348956	0.358251	0.370561	0.437522	0.61156	0.837217
0.0565709	0.157955	0.17452	0.0782081	-0.0606912	-0.203235	-0.262445	-0.279242	-0.241334	-0.206827	-0.141815	-0.0570851	-0.0725162	-0.0991575	-0.138983	-0.181018	-0.158339	-0.118446	-0.055143	0.0219283	0.0334706	-0.0285056	-0.0637719	-0.0271357	0.129933	0.339604	0.47671	0.497837	0.372763	0.172079	0.00350361	-0.0632271	-0.062359	-0.00627519	0.110227	0.260638	0.445251	0.57697	0.702189	0.757687	0.809188	0.782933	0.691545	0.596899	0.512786	0.466401	0.453635	0.51311	0.590508	0.669819
0.4004	0.579977	0.725998	0.910597	1.08324	1.19338	1.20587	1.15748	1.03937	0.811748	0.597936	0.427117	0.319515	0.277249	0.23747	0.153577	0.010072	-0.211825	-0.403988	-0.488122	-0.492066	-0.463273	-0.446861	-0.438374	-0.454668	-0.467733	-0.447962	-0.418681	-0.405447	-0.446783	-0.488246	-0.466058	-0.330567	-0.159265	0.0156438	0.0599229	-0.0214194	-0.166881	-0.229549	-0.200343	-0.0411228	0.107939	0.233374	0.317306	0.2841	0.192336	0.136018	0.118019	0.21026	0.405315
-0.919553	-0.699083	-0.54043	-0.451268	-0.461187	-0.479605	-0.419553	-0.276454	-0.10009	0.0315888	0.113062	0.18621	0.240896	0.244933	0.237691	0.232283	0.208832	0.115522	-0.0313583	-0.101101	-0.0761688	0.0784815	0.287511	0.455633	0.535816	0.561741	0.576692	0.609012	0.689089	0.718684	0.681221	0.656907	0.724133	0.856499	0.997996	1.06152	1.0157	0.87605	0.71128	0.584555	0.538401	0.569208	0.672797	0.825989	0.9987	1.14331	1.26554	1.30395	1.31225	1.31347
0.000810486	-0.0571723	-0.21601	-0.378572	-0.521568	-0.608286	-0.64134	-0.67407	-0.751735	-0.886738	-0.982077	-1.07043	-1.11822	-1.1677	-1.16776	-1.15065	-1.06424	-0.96637	-0.916801	-0.929857	-1.02696	-1.11859	-1.21183	-1.26257	-1.20344	-1.13513	-1.06389	-0.994687	-0.907759	-0.832664	-0.794671	-0.767518	-0.696429	-0.568662	-0.421499	-0.248686	-0.162166	-0.210836	-0.329571	-0.411461	-0.357397	-0.187708	-0.0076624	0.10574	0.0801464	-0.0259033	-0.0958661	-0.0637579	0.127786	0.359023
0.357128	0.562815	0.673351	0.682861	0.571529	0.465819	0.412984	0.430268	0.472844	0.468436	0.361123	0.204592	0.0453861	-0.0815339	-0.123339	-0.101987	-0.0315119	0.028599	0.120906	0.227856	0.379299	0.534425	0.685032	0.764486	0.749626	0.658645	0.523799	0.360988	0.205818	0.0564831	-0.0218689	0.0468552	0.193671	0.338574	0.33925	0.298144	0.246228	0.305819	0.495222	0.803844	1.10704	1.32967	1.42003	1.3408	1.2078	1.03801	0.903921	0.842851	0.798675	0.769725
-0.0156093	0.0885764	0.192149	0.299529	0.380166	0.388908	0.28302	0.128566	-0.0285269	-0.153763	-0.195013	-0.173944	-0.104404	-0.0450913	0.0459905	0.151521	0.300955	0.454022	0.60263	0.68103	0.666367	0.576594	0.443537	0.282887	0.129776	-0.0175772	-0.0948894	-0.0270774	0.11779	0.26077	0.261437	0.220877	0.169649	0.228449	0.415339	0.719865	1.01903	1.23872	1.32787	1.24969	1.11846	0.950925	0.818614	0.758355	0.714765	0.6862	0.643335	0.608127	0.63158	0.729614
0.842388	0.927022	0.909125	0.857879	0.767321	0.720847	0.720345	0.689563	0.627747	0.446238	0.17612	-0.170199	-0.469321	-0.663745	-0.709572	-0.690281	-0.634978	-0.560457	-0.406801	-0.202483	0.0645564	0.323165	0.533638	0.606977	0.505879	0.305646	0.103079	-0.0243857	-0.0485643	-0.0689181	-0.120864	-0.221516	-0.288807	-0.314074	-0.196521	0.0117141	0.220303	0.330576	0.341962	0.334137	0.416518	0.621092	0.860432	1.06197	1.17283	1.21777	1.23407	1.21559	1.15824	1.04379
-0.501188	-0.317826	-0.134262	0.100022	0.323843	0.508796	0.576191	0.483287	0.299282	0.113131	-0.0040025	-0.0262215	-0.0449258	-0.0926615	-0.185156	-0.246994	-0.270213	-0.162187	0.0291716	0.220855	0.322191	0.332654	0.325464	0.401168	0.589162	0.809104	0.994311	1.09618	1.13748	1.15246	1.13548	1.08278	0.977603	0.913239	0.87416	0.853848	0.823422	0.828026	0.812962	0.812322	0.833825	0.851482	0.855114	0.796425	0.693608	0.550076	0.458703	0.522653	0.727605	0.988169
-0.957603	-0.949956	-0.924629	-0.831468	-0.661521	-0.483946	-0.3683	-0.321835	-0.365653	-0.510161	-0.6663	-0.796364	-0.885357	-0.933923	-0.900836	-0.819274	-0.679269	-0.550517	-0.435687	-0.379458	-0.319413	-0.275142	-0.193909	-0.0891175	0.0296896	0.124114	0.224982	0.328286	0.363041	0.334829	0.276875	0.257298	0.279722	0.316576	0.302809	0.254498	0.208626	0.230808	0.347949	0.465135	0.527866	0.45052	0.320926	0.143711	-0.03126	-0.202011	-0.280816	-0.252956	-0.0907792	0.138931
-0.893466	-0.640479	-0.431527	-0.301291	-0.314632	-0.454808	-0.63633	-0.720159	-0.700715	-0.630117	-0.620781	-0.681343	-0.727853	-0.688839	-0.558631	-0.421675	-0.331168	-0.386472	-0.53513	-0.657433	-0.687373	-0.518532	-0.290712	-0.0211127	0.214254	0.450579	0.650838	0.703629	0.587842	0.34876	0.168143	0.123385	0.268947	0.40095	0.483783	0.477331	0.41713	0.414803	0.527572	0.773037	0.995428	1.13934	1.16962	1.11816	1.01063	0.854853	0.670178	0.488366	0.379706	0.412199
0.10709	0.140511	0.255083	0.430011	0.636732	0.761648	0.684531	0.41782	0.0857663	-0.197034	-0.333962	-0.325759	-0.201519	-0.0206517	0.108462	0.135682	0.104219	0.0238284	-0.0212826	-0.0664988	-0.0842909	-0.112075	-0.145264	-0.148582	-0.118736	-0.0817658	-0.0744943	-0.0742339	-0.0328107	0.112525	0.321964	0.51955	0.64226	0.640358	0.595885	0.517611	0.408427	0.260326	0.0824355	-0.0726917	-0.198924	-0.311349	-0.447	-0.591872	-0.716478	-0.799826	-0.811812	-0.728899	-0.638716	-0.55037
-0.871577	-0.848434	-0.800549	-0.782418	-0.791646	-0.777363	-0.735476	-0.62875	-0.465831	-0.296424	-0.12602	-0.0074945	0.0652239	0.0600871	-0.0154966	-0.155681	-0.238746	-0.250757	-0.214939	-0.174834	-0.19814	-0.273777	-0.280356	-0.191217	-0.0337271	0.152526	0.322192	0.392682	0.345838	0.139969	-0.124427	-0.396653	-0.600459	-0.712645	-0.720916	-0.720006	-0.728411	-0.7689	-0.802498	-0.814288	-0.778138	-0.678928	-0.533101	-0.316064	-0.153055	-0.0726207	-0.118512	-0.269065	-0.453696	-0.580319
-0.0632673	-0.0466713	-0.01418	0.0462422	0.0988167	0.122474	0.122715	0.153355	0.189145	0.190976	0.203384	0.205301	0.25889	0.370597	0.543303	0.722363	0.845601	0.880938	0.863686	0.8504	0.847571	0.865878	0.894361	0.845893	0.759621	0.604529	0.329629	0.00591636	-0.277465	-0.395546	-0.323814	-0.17044	0.0726745	0.295763	0.391473	0.340155	0.146851	-0.0624481	-0.233403	-0.321943	-0.346973	-0.317062	-0.222038	-0.0468468	0.21679	0.494021	0.765365	0.984116	1.1522	1.21329
0.264013	0.0611841	-0.127144	-0.255896	-0.258117	-0.190549	-0.0604877	0.115807	0.270819	0.395236	0.493915	0.50563	0.431987	0.306078	0.180026	0.237161	0.386521	0.611922	0.811236	0.877867	0.797971	0.611296	0.416613	0.283523	0.205489	0.0798699	-0.0297599	-0.206527	-0.34183	-0.420254	-0.429416	-0.401008	-0.354838	-0.324791	-0.299322	-0.278839	-0.275624	-0.305997	-0.37314	-0.44407	-0.470501	-0.377026	-0.217013	-0.0974174	-0.0849058	-0.143106	-0.209787	-0.281313	-0.309947	-0.339213
0.386697	0.287174	0.201955	0.146741	0.173014	0.297937	0.476995	0.641197	0.743556	0.762816	0.73606	0.679837	0.59602	0.549629	0.513391	0.492565	0.441839	0.381276	0.342841	0.318439	0.292318	0.290743	0.362418	0.498779	0.652718	0.783384	0.848401	0.926607	0.974125	1.03572	1.10859	1.1831	1.26063	1.24897	1.23765	1.2311	1.17554	1.0365	0.813648	0.596101	0.462372	0.47346	0.624747	0.772928	0.800506	0.741441	0.680516	0.642571	0.667162	0.716338
0.0778909	0.173514	0.26145	0.397443	0.446378	0.361099	0.099625	-0.197958	-0.470004	-0.615907	-0.666474	-0.677525	-0.641756	-0.590267	-0.473252	-0.389641	-0.385194	-0.508913	-0.702612	-0.909353	-1.07595	-1.20139	-1.30925	-1.35221	-1.31986	-1.24558	-1.13096	-1.00109	-0.916426	-0.919797	-0.982557	-1.06743	-1.10333	-1.09714	-1.14376	-1.11109	-1.09783	-1.06498	-1.04348	-1.09696	-1.13852	-1.13716	-1.02666	-0.860946	-0.725381	-0.715801	-0.759463	-0.862697	-0.92355	-0.921203
0.647838	0.394359	0.0480232	-0.271488	-0.545869	-0.691173	-0.744122	-0.755694	-0.718239	-0.664324	-0.541795	-0.454244	-0.449588	-0.579136	-0.781963	-0.998446	-1.17289	-1.30425	-1.41718	-1.46217	-1.4283	-1.35052	-1.2305	-1.0945	-1.00585	-1.00938	-1.0751	-1.16397	-1.20157	-1.19509	-1.2439	-1.20969	-1.19581	-1.1614	-1.13889	-1.19489	-1.23841	-1.23699	-1.12129	-0.947758	-0.805805	-0.795773	-0.841493	-0.949592	-1.01331	-1.01086	-0.924019	-0.796575	-0.597262	-0.409735
-1.02686	-0.901284	-0.808525	-0.752115	-0.701219	-0.642473	-0.528416	-0.446919	-0.442584	-0.563175	-0.751977	-0.953492	-1.11588	-1.23815	-1.34328	-1.38515	-1.35362	-1.28122	-1.1695	-1.04291	-0.960386	-0.963672	-1.02485	-1.10757	-1.14257	-1.13654	-1.18197	-1.15013	-1.13721	-1.10518	-1.08423	-1.13635	-1.17687	-1.17554	-1.06784	-0.906309	-0.774171	-0.764833	-0.807391	-0.908016	-0.96733	-0.965043	-0.884211	-0.765579	-0.580048	-0.405487	-0.247612	-0.159981	-0.134713	-0.150118
-0.229769	-0.0234659	0.299838	0.610093	0.919741	1.09968	1.17853	1.13017	1.03503	0.865636	0.586806	0.270409	0.00508411	-0.0830317	0.0190424	0.275031	0.575456	0.802985	0.875226	0.830565	0.672161	0.402347	0.0792817	-0.142268	-0.238311	-0.258902	-0.255251	-0.24487	-0.273983	-0.344919	-0.414704	-0.420662	-0.259657	-0.0484872	0.140787	0.273247	0.362476	0.432249	0.495241	0.565009	0.656991	0.711574	0.672715	0.607311	0.647698	0.74838	0.897681	1.00391	0.954609	0.76361
0.88698	0.834306	0.749032	0.643522	0.480502	0.240157	-0.0472238	-0.244302	-0.329737	-0.348054	-0.344806	-0.335571	-0.36147	-0.42457	-0.486647	-0.491947	-0.348726	-0.16088	0.00748799	0.125317	0.20469	0.266756	0.322791	0.384853	0.466675	0.515229	0.480663	0.422483	0.458409	0.54797	0.68078	0.775279	0.73142	0.561518	0.291867	0.0150264	-0.204511	-0.296994	-0.292657	-0.138795	0.093704	0.310517	0.493172	0.584079	0.586193	0.551438	0.536404	0.605844	0.705367	0.784591
-0.0147701	0.129338	0.311131	0.456722	0.556916	0.564894	0.496085	0.467803	0.547926	0.791048	1.10156	1.29526	1.32919	1.27918	1.20234	1.22031	1.28391	1.35782	1.33743	1.19855	0.987373	0.757679	0.553465	0.40425	0.328954	0.278159	0.259748	0.300852	0.342741	0.35037	0.305947	0.305389	0.279217	0.243461	0.237862	0.236059	0.187451	0.152208	0.111318	0.0974224	0.0853197	0.103962	0.192349	0.347817	0.504321	0.579389	0.552119	0.468871	0.365477	0.249336
0.976296	0.916487	0.730121	0.499987	0.22236	-0.0147148	-0.159258	-0.172582	-0.0196987	0.237261	0.561428	0.855934	1.11095	1.25644	1.35768	1.34669	1.29432	1.18306	1.05015	0.958971	0.923589	0.866472	0.7881	0.695453	0.608015	0.494004	0.397479	0.396214	0.534866	0.777006	0.975273	1.09202	1.05024	0.893449	0.730359	0.597676	0.499018	0.465114	0.463767	0.464059	0.444174	0.425906	0.442043	0.520175	0.624022	0.738866	0.844048	0.862577	0.77167	0.622476
0.72487	0.438635	0.137647	-0.152006	-0.414003	-0.587781	-0.683746	-0.61328	-0.491126	-0.34024	-0.28744	-0.353255	-0.555781	-0.814357	-1.05495	-1.19059	-1.13606	-0.906121	-0.600983	-0.406418	-0.428335	-0.599759	-0.789579	-0.879494	-0.939939	-0.999651	-1.0938	-1.13446	-1.10557	-1.04255	-1.00678	-0.997022	-1.04785	-1.08609	-1.05625	-0.926868	-0.784433	-0.686657	-0.680782	-0.720661	-0.763923	-0.744701	-0.649911	-0.541331	-0.47603	-0.458281	-0.458659	-0.431133	-0.348913	-0.255994
0.342386	0.144896	-0.0546063	-0.262889	-0.365147	-0.303862	-0.17378	-0.0917446	-0.120046	-0.295867	-0.600414	-0.909897	-1.16536	-1.30077	-1.32094	-1.27427	-1.21296	-1.11413	-0.975644	-0.77931	-0.564139	-0.427148	-0.359507	-0.363782	-0.377449	-0.384907	-0.329655	-0.27994	-0.298311	-0.35626	-0.339372	-0.202705	0.0435793	0.20476	0.325029	0.362859	0.277605	0.12871	-0.00940134	-0.076459	-0.0693454	0.0603286	0.218688	0.257864	0.143836	-0.0570534	-0.18136	-0.143793	-0.0165839	0.157238
0.379413	0.202793	-0.00813899	-0.148452	-0.15786	-0.080207	0.0335535	0.075861	0.0926925	0.0314288	-0.0647915	-0.200817	-0.331321	-0.458633	-0.526769	-0.52937	-0.441747	-0.283657	-0.0872626	0.0678751	0.0936247	0.0745772	0.0783489	0.229301	0.519405	0.847638	1.10739	1.25528	1.29377	1.27262	1.28534	1.27544	1.27318	1.27437	1.25258	1.16575	0.987081	0.740481	0.448383	0.211701	0.0211502	-0.1058	-0.151212	-0.133126	-0.0664396	0.0336911	0.0981173	0.117702	0.09982	0.117178
0.24143	-0.00550464	-0.172965	-0.229219	-0.163408	-0.0470543	0.0257306	0.0304189	0.0529893	0.139368	0.309069	0.537247	0.656644	0.666019	0.504007	0.34829	0.363443	0.466759	0.664638	0.851177	0.936752	0.880949	0.766316	0.596734	0.527638	0.56463	0.686299	0.828689	0.919592	0.954404	0.907452	0.837017	0.732347	0.614139	0.507317	0.457106	0.431686	0.432982	0.367294	0.342119	0.360219	0.475141	0.706214	0.886086	0.918243	0.806619	0.646887	0.42872	0.275825	0.152178
-0.192951	-0.0487582	0.0935515	0.196337	0.225171	0.152092	0.0219434	-0.143795	-0.235681	-0.239138	-0.108202	0.0931681	0.278466	0.370083	0.371974	0.269803	0.104318	-0.0622521	-0.138931	-0.132951	-0.0291624	0.135758	0.295101	0.46805	0.659306	0.800935	0.80639	0.629953	0.324124	0.0290739	-0.205578	-0.356291	-0.371844	-0.281939	-0.139212	0.0293462	0.128281	0.139555	0.0947807	0.1064	0.236337	0.450702	0.654404	0.775804	0.80645	0.821475	0.900267	1.09495	1.36747	1.55753
-0.818587	-0.704215	-0.627879	-0.651853	-0.779372	-0.987714	-1.1768	-1.26307	-1.2296	-1.18561	-1.14076	-1.1062	-1.07574	-1.0186	-0.950766	-0.891498	-0.882581	-0.935307	-1.01855	-1.05042	-1.00338	-0.961591	-0.970794	-1.07491	-1.21561	-1.36009	-1.45359	-1.45128	-1.36224	-1.13414	-0.833409	-0.551246	-0.358721	-0.281157	-0.354586	-0.500276	-0.717838	-0.846438	-0.870853	-0.786889	-0.64438	-0.559353	-0.5312	-0.532477	-0.462247	-0.367352	-0.294655	-0.288016	-0.368198	-0.529793
-1.18214	-1.25079	-1.22559	-1.18049	-1.09521	-1.03116	-1.01576	-1.0204	-1.0225	-1.02834	-0.982771	-0.899104	-0.839131	-0.772008	-0.790033	-0.876183	-0.976512	-1.08067	-1.10146	-1.00814	-0.876988	-0.769105	-0.722921	-0.779706	-0.846872	-0.87479	-0.849379	-0.805477	-0.734377	-0.650672	-0.600123	-0.617422	-0.660177	-0.689943	-0.660893	-0.599107	-0.585336	-0.612718	-0.653724	-0.650308	-0.515826	-0.388905	-0.257957	-0.165416	-0.118698	-0.15443	-0.181798	-0.227755	-0.293258	-0.372797
-0.878087	-0.875102	-0.878161	-0.874542	-0.872451	-0.826413	-0.74485	-0.686384	-0.620948	-0.63852	-0.722505	-0.820312	-0.921849	-0.942118	-0.851147	-0.72329	-0.618118	-0.573095	-0.628452	-0.693931	-0.721146	-0.696375	-0.653576	-0.584262	-0.502661	-0.453382	-0.470247	-0.511928	-0.540945	-0.512625	-0.452392	-0.438967	-0.465662	-0.505637	-0.502306	-0.371204	-0.247473	-0.119817	-0.0296006	0.015943	-0.0188911	-0.0455713	-0.0903728	-0.15423	-0.23177	-0.393595	-0.522037	-0.64272	-0.709029	-0.740394
-0.358316	-0.150156	0.0417402	0.184146	0.189603	0.0732215	-0.151932	-0.443618	-0.715428	-0.896142	-0.976465	-0.948972	-0.840327	-0.736627	-0.654301	-0.576619	-0.490034	-0.387616	-0.278731	-0.249928	-0.264262	-0.310048	-0.367724	-0.388091	-0.412624	-0.461484	-0.486134	-0.431933	-0.310757	-0.129671	0.0727006	0.254336	0.345849	0.326446	0.211219	0.0750512	-0.0352759	-0.0649883	0.0128036	0.172859	0.422571	0.691383	0.852817	0.809504	0.594818	0.278303	0.0461072	-0.0284644	0.0788832	0.269789
0.72249	0.890029	1.08981	1.25466	1.38349	1.44793	1.39558	1.22013	0.976949	0.754125	0.661273	0.670628	0.757365	0.85124	0.927769	0.943752	0.959495	1.00755	1.04622	1.12687	1.22687	1.32335	1.29937	1.15471	0.897299	0.668504	0.475111	0.363835	0.289314	0.211744	0.152739	0.0879014	0.0928685	0.0963233	0.197423	0.325628	0.478382	0.629525	0.730342	0.771376	0.792356	0.793128	0.780815	0.802007	0.863139	0.918053	0.960824	0.992635	0.978294	0.895234
-0.948641	-0.791306	-0.641363	-0.57908	-0.581033	-0.650447	-0.700101	-0.750001	-0.730413	-0.583918	-0.383134	-0.213968	-0.0650297	0.0650952	0.187904	0.377627	0.590711	0.749331	0.686501	0.415258	0.138679	-0.0139229	-0.0303143	0.0515801	0.124812	0.109966	-0.0391988	-0.27474	-0.450359	-0.532269	-0.532921	-0.438914	-0.293703	-0.0400806	0.24225	0.454049	0.5463	0.497949	0.339245	0.126797	-0.0335406	-0.170428	-0.239585	-0.324618	-0.340669	-0.346356	-0.395115	-0.497887	-0.634023	-0.703872
-0.452283	-0.462462	-0.451034	-0.388735	-0.349869	-0.358156	-0.421122	-0.442623	-0.372625	-0.180815	0.106292	0.361071	0.573923	0.694419	0.759494	0.775951	0.738791	0.616734	0.46782	0.379833	0.350104	0.359878	0.376316	0.355795	0.34812	0.333231	0.34458	0.38594	0.485489	0.557321	0.622191	0.716078	0.790966	0.884996	0.918896	0.894247	0.747661	0.503611	0.226278	0.0360497	-0.0325911	0.0584626	0.191406	0.261098	0.140559	-0.0829773	-0.311827	-0.43456	-0.428857	-0.314719
0.679883	0.470482	0.295327	0.243645	0.261496	0.314653	0.378978	0.457068	0.601564	0.791463	1.02342	1.23294	1.38789	1.39085	1.21262	0.912042	0.584092	0.326343	0.0937453	-0.0174088	-0.0783841	-0.046687	0.00353252	0.115586	0.192097	0.289784	0.401555	0.539496	0.623088	0.59939	0.489787	0.357139	0.304827	0.372194	0.594108	0.816447	0.971115	1.02517	1.0069	0.937345	0.835816	0.685974	0.428718	0.182927	0.0697003	0.0796604	0.115648	0.101755	0.0547038	0.0171891
1.45714	1.4577	1.45548	1.40005	1.32532	1.30047	1.30607	1.37593	1.49592	1.59064	1.58624	1.52822	1.33922	1.0806	0.772587	0.552475	0.405668	0.326093	0.300983	0.374318	0.555957	0.798629	1.01564	1.13279	1.0182	0.729802	0.342922	0.0162675	-0.167998	-0.118626	0.0718115	0.269048	0.321683	0.228897	0.0317448	-0.214641	-0.409963	-0.439651	-0.356903	-0.160103	0.0425951	0.146372	0.10012	-0.0497339	-0.156583	-0.213915	-0.117646	0.0252639	0.205418	0.281648
1.34758	1.3562	1.39866	1.43208	1.40182	1.33166	1.15463	0.912361	0.623836	0.417649	0.280128	0.205587	0.182066	0.250761	0.42091	0.648231	0.851513	0.961257	0.853913	0.583758	0.221351	-0.0846394	-0.257248	-0.211	-0.032609	0.152151	0.201456	0.114539	-0.0701411	-0.300941	-0.483907	-0.511717	-0.434204	-0.249853	-0.0599772	0.037235	-0.00609144	-0.146466	-0.246556	-0.300261	-0.210082	-0.076212	0.0925458	0.163953	0.152998	0.0534179	-0.0332258	-0.0755816	-0.0832438	-0.0632053
0.0394504	-0.214635	-0.429213	-0.54262	-0.595232	-0.511584	-0.388991	-0.234449	-0.169057	-0.179089	-0.270281	-0.349626	-0.388414	-0.395431	-0.37708	-0.370489	-0.328487	-0.2421	-0.122735	-0.0232455	0.00987362	-0.126813	-0.34873	-0.592363	-0.786131	-0.860457	-0.853857	-0.812089	-0.755905	-0.733186	-0.774998	-0.875291	-0.949969	-0.957245	-0.856492	-0.671109	-0.468934	-0.315974	-0.204036	-0.134942	-0.0966092	-0.139649	-0.263243	-0.430895	-0.608789	-0.717876	-0.766605	-0.779957	-0.823499	-0.8722
0.590761	0.580451	0.619183	0.728232	0.773534	0.718189	0.536708	0.337245	0.133662	0.0390843	0.0651342	0.118919	0.15174	0.0912277	-0.0238962	-0.164478	-0.271391	-0.328267	-0.306635	-0.233982	-0.0613014	0.222508	0.540385	0.768403	0.831667	0.716131	0.43453	0.130729	-0.138573	-0.278022	-0.361069	-0.340413	-0.144645	0.119306	0.405086	0.632846	0.745769	0.635691	0.426661	0.131102	-0.0906691	-0.214741	-0.222977	-0.151074	-0.187065	-0.406586	-0.702237	-0.859636	-0.880758	-0.828667
-0.101478	0.136169	0.296844	0.376588	0.36516	0.329501	0.432476	0.581464	0.725475	0.732211	0.629824	0.485573	0.355198	0.23383	0.188771	0.249988	0.438135	0.688771	0.904176	1.07066	1.10418	1.02893	0.834565	0.598356	0.414586	0.291599	0.24695	0.303536	0.473457	0.705273	0.938457	1.10534	1.20355	1.2361	1.22789	1.18839	1.17554	1.16937	1.14455	1.1389	1.10893	1.04104	0.939915	0.906846	0.97996	1.092	1.18196	1.21411	1.20171	1.18688
-0.747899	-0.698866	-0.669207	-0.602652	-0.562649	-0.526572	-0.435333	-0.283859	-0.0855901	0.093869	0.260815	0.358751	0.386134	0.321343	0.191813	0.0961012	0.118563	0.263488	0.467532	0.652125	0.73779	0.704499	0.620035	0.602682	0.657017	0.688621	0.614843	0.492707	0.352966	0.187216	0.0594718	-0.0266008	0.0405434	0.213328	0.492355	0.763433	0.948271	0.942545	0.791655	0.546936	0.249318	-0.0571898	-0.372779	-0.683928	-1.04288	-1.38057	-1.65321	-1.81102	-1.86481	-1.85989
-0.347105	-0.123599	0.00917128	-0.0269427	-0.136218	-0.246373	-0.298271	-0.264883	-0.190625	-0.178472	-0.239398	-0.299419	-0.290889	-0.156254	0.0417903	0.134889	0.0821195	-0.0883694	-0.276928	-0.375282	-0.317679	-0.156428	0.0197762	0.157096	0.210825	0.213043	0.207367	0.250529	0.337008	0.465184	0.617455	0.744408	0.879587	0.905335	0.930283	0.944685	0.904421	0.861438	0.869372	0.948591	1.06287	1.11427	1.04997	0.868256	0.648986	0.438222	0.25852	0.127767	0.0486816	0.0807699
-0.766142	-0.63236	-0.455156	-0.281248	-0.134836	-0.0883188	-0.21353	-0.4596	-0.752607	-0.993465	-1.13243	-1.18655	-1.13651	-1.0011	-0.794369	-0.573974	-0.38138	-0.243406	-0.216658	-0.301854	-0.443339	-0.55537	-0.679516	-0.80983	-0.972964	-1.06384	-1.06822	-0.899226	-0.636585	-0.323755	-0.0383459	0.13201	0.172698	0.1118	-0.0231135	-0.18553	-0.312808	-0.391323	-0.339591	-0.221307	-0.111369	0.0266716	0.117774	0.186138	0.159372	0.0385815	-0.113885	-0.207034	-0.222527	-0.206534
0.0328914	-0.00159379	-0.0615617	-0.170627	-0.404778	-0.696436	-0.967143	-1.13136	-1.15573	-1.10717	-1.04415	-1.06704	-1.11623	-1.10794	-1.04524	-0.895997	-0.7417	-0.596481	-0.499762	-0.421332	-0.342931	-0.21774	-0.105401	0.0452001	0.179592	0.258232	0.178578	-0.0324737	-0.27543	-0.445775	-0.489397	-0.459485	-0.397712	-0.257762	-0.0686519	0.055277	0.0951318	0.0260871	-0.110556	-0.188483	-0.0960939	0.139814	0.516459	0.852529	1.08954	1.14393	1.05689	0.873858	0.665801	0.546247
0.464128	0.62502	0.741579	0.84772	0.887623	0.872826	0.759841	0.518345	0.264217	0.0651576	-0.0597854	-0.0750086	-0.0335036	0.13927	0.42171	0.676932	0.723262	0.567135	0.278237	0.0168392	-0.0883984	-0.0813755	-0.0393516	-0.0879109	-0.234817	-0.362083	-0.475507	-0.466802	-0.323485	0.00582325	0.394183	0.771296	1.00494	1.0976	1.02293	0.883201	0.724783	0.604353	0.520761	0.463198	0.395824	0.344829	0.287901	0.227352	0.118958	0.0128778	-0.0687267	-0.081054	0.00868585	0.181855
-0.63764	-0.666203	-0.643377	-0.601258	-0.555057	-0.488481	-0.453526	-0.385348	-0.289103	-0.148104	0.0216069	0.16704	0.25447	0.352266	0.443553	0.537329	0.658142	0.681338	0.653483	0.533381	0.34216	0.150998	-0.0771408	-0.32644	-0.614674	-0.832644	-0.959318	-0.890593	-0.705107	-0.43769	-0.130748	0.160231	0.383302	0.552322	0.636955	0.613627	0.501049	0.333262	0.189583	0.128729	0.0959966	0.0648983	-0.0433518	-0.190137	-0.328631	-0.3438	-0.299944	-0.225674	-0.164425	-0.0892845
0.163528	0.0604597	-0.0870557	-0.314374	-0.584489	-0.894115	-1.10909	-1.18878	-1.05963	-0.805001	-0.56173	-0.441008	-0.514692	-0.7041	-0.972044	-1.24759	-1.39156	-1.32408	-1.16192	-0.994336	-0.929447	-0.968838	-1.02679	-1.07543	-0.99881	-0.845041	-0.74537	-0.765428	-0.894439	-1.00097	-0.997951	-0.850806	-0.57915	-0.299616	-0.158593	-0.160013	-0.283676	-0.390017	-0.459142	-0.467005	-0.531352	-0.618687	-0.753169	-0.886482	-0.949468	-0.932367	-0.799176	-0.593863	-0.364513	-0.0988277
0.193646	0.148621	-0.0249652	-0.198793	-0.29533	-0.247276	-0.0760477	0.132182	0.275193	0.315499	0.343892	0.397999	0.557042	0.729638	0.808578	0.725496	0.470711	0.11997	-0.191691	-0.335321	-0.335032	-0.217315	-0.10242	-0.0420263	-0.0309147	-0.0245868	0.0282909	-0.00921849	-0.110461	-0.231607	-0.233077	-0.106538	0.108597	0.392674	0.589965	0.695848	0.753256	0.804571	0.828926	0.821497	0.786971	0.754205	0.722554	0.684058	0.653358	0.636285	0.568602	0.438623	0.313484	0.25712
-0.559319	-0.424475	-0.36326	-0.400775	-0.554046	-0.784091	-0.989029	-1.08925	-1.06883	-1.00872	-0.93676	-0.915327	-0.900946	-0.885541	-0.894748	-0.938438	-1.03083	-1.17206	-1.28168	-1.3083	-1.22801	-1.0946	-0.949585	-0.892997	-0.96088	-1.14973	-1.36876	-1.48152	-1.4689	-1.37601	-1.25825	-1.15759	-1.15828	-1.22489	-1.33333	-1.53988	-1.76352	-1.88337	-1.84837	-1.65569	-1.3787	-1.1644	-1.05707	-1.05209	-1.08557	-1.13912	-1.17492	-1.18614	-1.19621	-1.2067
0.0810434	-0.0741282	-0.195995	-0.271766	-0.341431	-0.376196	-0.387393	-0.397437	-0.407905	-0.521614	-0.664942	-0.806845	-0.867967	-0.770704	-0.539249	-0.262568	-0.039497	0.129574	0.192037	0.23917	0.291054	0.341636	0.355662	0.333704	0.234707	0.105212	-0.0210302	-0.0909429	-0.142326	-0.169204	-0.165429	-0.125995	-0.0763111	-0.0614323	-0.100812	-0.228955	-0.378469	-0.526317	-0.639904	-0.648188	-0.595358	-0.504609	-0.330738	-0.108404	0.0945233	0.22727	0.25848	0.231302	0.13548	0.0628303
-0.475113	-0.392026	-0.302483	-0.197616	-0.00259449	0.248485	0.482695	0.635906	0.671927	0.640559	0.529966	0.446116	0.430189	0.462896	0.493864	0.47139	0.37233	0.205139	0.00357452	-0.136754	-0.111663	0.117128	0.510821	0.901743	1.1671	1.24011	1.1232	0.917486	0.625466	0.378294	0.179614	-0.0100416	-0.121873	-0.150251	-0.113128	-0.0505266	0.0259603	0.0641727	-0.0212017	-0.172904	-0.339335	-0.442739	-0.465512	-0.413008	-0.236177	-0.00897365	0.255371	0.46132	0.612332	0.6609
-0.0835621	-0.189009	-0.207002	-0.16939	-0.112346	-0.0970566	-0.21074	-0.434736	-0.676101	-0.782259	-0.664958	-0.407941	-0.169231	-0.0837446	-0.164752	-0.280234	-0.28103	-0.153833	-0.00596919	0.102093	0.185495	0.264004	0.311948	0.378162	0.403284	0.355365	0.147576	-0.169012	-0.562383	-0.929084	-1.23707	-1.3547	-1.31831	-1.12822	-0.825732	-0.535283	-0.320354	-0.232762	-0.280524	-0.386079	-0.500732	-0.600321	-0.678733	-0.716803	-0.694252	-0.612678	-0.511612	-0.507223	-0.558853	-0.645839
0.760375	0.626867	0.526389	0.486243	0.527036	0.591795	0.691472	0.799746	0.874102	0.828796	0.766464	0.709887	0.76711	0.932214	1.02985	1.05198	0.905208	0.680287	0.438526	0.18965	0.0179631	-0.0671266	-0.0514445	0.0634843	0.259457	0.415066	0.564137	0.66663	0.781133	0.950544	1.07161	1.10996	1.0846	1.03725	1.02665	1.03394	1.11875	1.22291	1.35014	1.4427	1.43565	1.37537	1.20122	0.974718	0.776997	0.600755	0.453163	0.318126	0.210344	0.178276
-0.0835145	0.082534	0.242748	0.308802	0.300428	0.246873	0.225698	0.265518	0.308718	0.276668	0.154048	0.0318046	-0.100261	-0.10369	-0.0383475	0.08132	0.197105	0.286116	0.311194	0.312623	0.333452	0.431901	0.575791	0.697066	0.767546	0.803424	0.777653	0.686358	0.565711	0.450606	0.36718	0.304464	0.270062	0.19232	0.087438	0.012901	0.0194634	0.0433223	0.00906817	-0.066396	-0.155197	-0.165876	-0.0808657	0.0717074	0.203783	0.317034	0.350818	0.387406	0.40457	0.368257
0.644192	0.437407	0.297788	0.246122	0.312197	0.433566	0.550802	0.618936	0.653619	0.628706	0.540452	0.423822	0.31255	0.231903	0.171275	0.138018	0.0628655	-0.0385239	-0.110579	-0.104235	-0.0811704	-0.114284	-0.187235	-0.273079	-0.283402	-0.201223	-0.0537306	0.0739472	0.183426	0.216085	0.251455	0.268047	0.232944	0.139374	0.106636	0.1873	0.361748	0.484511	0.468819	0.326711	0.102703	-0.0482657	-0.132899	-0.186463	-0.288799	-0.401932	-0.535982	-0.646184	-0.723674	-0.815754
0.216081	0.415142	0.617908	0.793573	0.885208	0.87514	0.831397	0.693131	0.565612	0.461528	0.355693	0.328835	0.447821	0.684329	0.931242	1.08236	1.04711	0.89482	0.664625	0.499227	0.387918	0.297194	0.173987	-0.0233442	-0.263919	-0.398425	-0.279603	0.0597719	0.442112	0.686858	0.733957	0.577005	0.363282	0.172125	0.0239471	-0.0817389	-0.113787	-0.0634706	0.0546599	0.166127	0.212426	0.222798	0.247542	0.320653	0.444629	0.571907	0.67849	0.741367	0.773638	0.798995
-0.541843	-0.604093	-0.701675	-0.74108	-0.662544	-0.428816	-0.116204	0.178711	0.376121	0.49131	0.58875	0.713031	0.88379	1.01067	1.03567	0.949589	0.735495	0.442538	0.208228	0.119186	0.150548	0.180833	0.212699	0.142722	0.0372084	-0.113424	-0.237966	-0.323775	-0.408988	-0.448887	-0.415283	-0.25387	-0.119356	0.00803076	0.0525549	0.0421746	-0.0336328	-0.152967	-0.243274	-0.285406	-0.245966	-0.146642	-0.00127031	0.0997842	0.111633	0.126419	0.178918	0.290952	0.390213	0.489578
-0.727034	-0.515719	-0.412162	-0.388125	-0.465302	-0.550051	-0.588547	-0.593446	-0.569871	-0.533368	-0.46534	-0.44126	-0.406004	-0.374394	-0.282674	-0.109275	0.127573	0.359726	0.506089	0.504477	0.36526	0.153129	-0.0602009	-0.183299	-0.194366	-0.177494	-0.127317	-0.0902048	-0.098592	-0.0905651	-0.0915771	-0.0834059	-0.0398916	0.0464455	0.120849	0.11312	-0.0199873	-0.243873	-0.475254	-0.69674	-0.843691	-0.849828	-0.724646	-0.53279	-0.333495	-0.218061	-0.206878	-0.253312	-0.306559	-0.35598
-0.259511	-0.0611276	0.203226	0.447839	0.604476	0.564035	0.321508	-0.0740587	-0.426861	-0.630008	-0.606422	-0.395968	-0.0777468	0.200603	0.351924	0.349207	0.240813	0.145718	0.0969186	0.0945041	0.0856196	0.0288712	-0.0709615	-0.148283	-0.214607	-0.268525	-0.247969	-0.213679	-0.165574	-0.111059	-0.0654112	-0.0191251	0.0094539	0.0240327	-0.0283257	-0.204636	-0.495126	-0.872682	-1.16058	-1.31799	-1.28405	-1.14962	-1.02928	-0.97396	-1.02772	-1.17636	-1.39719	-1.59529	-1.68618	-1.69105
0.586044	0.718313	0.767496	0.655693	0.378678	-0.028622	-0.386339	-0.592317	-0.568402	-0.355016	-0.0323614	0.249867	0.403295	0.400541	0.290636	0.194216	0.144737	0.142289	0.133281	0.075742	-0.0254816	-0.10388	-0.171129	-0.225798	-0.204955	-0.170188	-0.121412	-0.0661381	-0.0198539	0.027077	0.0560542	0.0708361	0.0177483	-0.161019	-0.455556	-0.838372	-1.13028	-1.28989	-1.25547	-1.11917	-0.997154	-0.94106	-0.995566	-1.14628	-1.37019	-1.57104	-1.6632	-1.66815	-1.61043	-1.50355
-0.465968	-0.421177	-0.401691	-0.35501	-0.313313	-0.307598	-0.340938	-0.370832	-0.385287	-0.366461	-0.304675	-0.184732	-0.00155616	0.202469	0.378631	0.528571	0.648381	0.747609	0.808245	0.761193	0.645631	0.550648	0.493996	0.483356	0.449727	0.249733	-0.0385243	-0.311951	-0.420008	-0.347671	-0.129935	0.0720384	0.235105	0.31104	0.349276	0.363289	0.431551	0.525343	0.66682	0.818244	0.915752	0.892613	0.742955	0.518457	0.316201	0.187267	0.169439	0.210595	0.222656	0.206688
1.07462	0.987985	0.8338	0.628293	0.484869	0.437495	0.479056	0.52388	0.49715	0.418415	0.294486	0.127881	-0.0382008	-0.132669	-0.16331	-0.00734212	0.140326	0.246928	0.222809	0.182784	0.161304	0.161064	0.171414	0.241071	0.396021	0.604352	0.896455	1.16071	1.38	1.52655	1.61453	1.69242	1.74421	1.7328	1.68241	1.5758	1.43096	1.35506	1.32578	1.32561	1.35221	1.35018	1.35855	1.43877	1.60601	1.81706	2.03914	2.19672	2.26174	2.16829
0.393331	0.350193	0.301168	0.191613	0.0718209	-0.0251788	-0.0838277	-0.0838453	-0.0591285	-0.0315772	0.00643767	0.125592	0.286328	0.534154	0.73147	0.802572	0.731236	0.603826	0.503706	0.4993	0.544825	0.635308	0.773639	0.91042	1.03002	1.0955	1.09566	1.02696	0.896474	0.748179	0.663341	0.618249	0.604297	0.652228	0.733286	0.807517	0.810848	0.697289	0.465096	0.217848	0.0185057	-0.0631937	-0.0341884	0.0249119	0.0707639	0.0987578	0.149674	0.240621	0.376851	0.474821
0.135304	0.191868	0.259313	0.297369	0.317184	0.279173	0.204223	0.12302	0.053498	0.0832232	0.212262	0.356369	0.454444	0.491381	0.418369	0.296633	0.0958841	-0.0899605	-0.205409	-0.193576	-0.035104	0.231629	0.521556	0.779738	0.992045	1.06593	0.992125	0.813413	0.640629	0.54759	0.558753	0.568091	0.565801	0.564994	0.530071	0.526383	0.528915	0.526055	0.584618	0.761158	0.969144	1.149	1.16577	0.965802	0.641012	0.355782	0.241821	0.327716	0.552165	0.777544
1.26156	1.10299	0.868987	0.6084	0.39338	0.283229	0.295862	0.30643	0.303838	0.302925	0.263402	0.259229	0.262094	0.258857	0.325134	0.524928	0.760311	0.963859	0.982842	0.756529	0.388957	0.0661552	-0.062817	0.0343921	0.288406	0.543473	0.767996	0.898089	0.995494	1.09859	1.1522	1.12535	1.05092	0.992036	1.02418	1.10114	1.18637	1.29778	1.40702	1.44233	1.44286	1.34729	1.23644	1.12939	1.08695	1.13133	1.24073	1.28711	1.26545	1.22691
1.30739	1.25058	1.08109	0.749817	0.325562	-0.0161881	-0.152945	-0.0498683	0.219477	0.489938	0.728012	0.865958	0.969241	1.07856	1.13541	1.10693	1.02801	0.965575	0.999658	1.08126	1.17164	1.28978	1.40561	1.44304	1.44361	1.34227	1.22473	1.11121	1.06622	1.11328	1.22928	1.27846	1.25549	1.21462	1.1584	1.14154	1.11974	1.05711	0.974849	0.885925	0.804577	0.688887	0.51478	0.36591	0.322708	0.378999	0.482128	0.543339	0.53759	0.542795
1.11139	0.992637	0.83428	0.700737	0.557367	0.430814	0.313169	0.251135	0.252	0.351226	0.52833	0.702307	0.845694	0.849756	0.741864	0.501752	0.211757	-0.0649286	-0.212283	-0.179006	0.0234363	0.282343	0.517039	0.643986	0.633245	0.455003	0.165109	-0.148012	-0.365899	-0.499876	-0.602195	-0.673482	-0.67197	-0.564151	-0.393375	-0.156402	0.05459	0.286285	0.399695	0.414876	0.325349	0.295885	0.427127	0.609647	0.759218	0.771317	0.654653	0.417388	0.23239	0.171816
-0.583466	-0.375867	-0.118542	0.131198	0.352069	0.46482	0.453981	0.274117	-0.018415	-0.334386	-0.554256	-0.689452	-0.792703	-0.864638	-0.863113	-0.754313	-0.581982	-0.342852	-0.12994	0.103864	0.218305	0.233625	0.143283	0.113551	0.245987	0.430169	0.581101	0.593309	0.475584	0.236159	0.0494779	-0.0116477	0.0979008	0.323072	0.552629	0.678981	0.619672	0.395609	0.103758	-0.0343892	0.0119073	0.252052	0.532493	0.851719	1.03853	0.996184	0.792791	0.477995	0.209185	0.0543518
-0.529308	-0.380121	-0.205736	-0.0767556	-0.0644853	-0.171216	-0.34216	-0.541178	-0.659439	-0.698226	-0.668357	-0.632065	-0.542838	-0.381955	-0.189774	-0.0571879	-0.00418185	0.0330198	0.129907	0.262714	0.368892	0.401102	0.338623	0.23609	0.114765	0.0462806	0.0288835	0.025085	0.00127732	-0.0418252	-0.0572039	-0.0413345	0.00316993	0.0344965	0.0388736	0.020111	0.0289438	0.0882142	0.171165	0.274639	0.329472	0.308233	0.269123	0.180377	0.0793486	-0.0295324	-0.126187	-0.197946	-0.270158	-0.29374
0.578588	0.510566	0.409842	0.305505	0.19653	0.137287	0.121001	0.117445	0.0951578	0.054808	0.0404114	0.0552673	0.0969295	0.126256	0.130353	0.112789	0.121057	0.176543	0.254196	0.351061	0.402393	0.38251	0.345898	0.262819	0.168243	0.0663157	-0.0241659	-0.0913425	-0.158942	-0.181018	-0.139925	-0.068887	0.0102133	0.128526	0.227409	0.307059	0.344385	0.320626	0.285197	0.207011	0.134295	0.129476	0.208481	0.333131	0.49991	0.639479	0.655687	0.496117	0.207993	-0.0904448
0.336649	0.281915	0.229531	0.133881	0.0471333	0.0409649	0.140905	0.298584	0.509556	0.686107	0.706611	0.504758	0.140287	-0.23723	-0.549366	-0.721184	-0.756206	-0.685233	-0.559623	-0.409561	-0.27688	-0.208329	-0.23186	-0.329563	-0.407383	-0.425504	-0.469645	-0.479573	-0.478293	-0.467087	-0.481911	-0.515467	-0.512984	-0.477569	-0.37359	-0.250605	-0.130754	-0.0605037	-0.0146493	0.01094	-0.0733093	-0.19065	-0.333795	-0.472668	-0.670681	-0.882042	-1.05977	-1.05056	-0.876526	-0.612223
-0.202273	-0.113338	-0.0193483	0.0529098	0.0262732	-0.0887901	-0.241386	-0.347136	-0.378539	-0.380454	-0.297671	-0.17708	0.0511748	0.3395	0.671737	0.924136	1.01151	0.963702	0.786446	0.599567	0.430734	0.278076	0.0878996	-0.1626	-0.428639	-0.594699	-0.627465	-0.515091	-0.319418	-0.0956606	0.0937071	0.196344	0.2171	0.198727	0.199989	0.246577	0.301224	0.377135	0.457257	0.541599	0.53222	0.467037	0.341459	0.220516	0.156444	0.233037	0.342777	0.523731	0.711747	0.870754
-0.0118217	-0.181154	-0.319622	-0.397111	-0.409233	-0.401637	-0.318155	-0.196546	0.0336371	0.324397	0.659441	0.913971	1.00208	0.953872	0.775119	0.586661	0.416402	0.262455	0.0706721	-0.181943	-0.450229	-0.617692	-0.650734	-0.537411	-0.340086	-0.114438	0.0765287	0.180033	0.200964	0.182436	0.183708	0.23069	0.285798	0.36235	0.443149	0.528204	0.518746	0.453012	0.326373	0.204408	0.139796	0.217035	0.327703	0.510185	0.699789	0.860138	0.894529	0.811398	0.658763	0.550226
0.515598	0.44825	0.380285	0.316763	0.211636	0.0962954	-0.00352198	-0.0985644	-0.135548	-0.195583	-0.335918	-0.542128	-0.764415	-0.899463	-0.918688	-0.832027	-0.702326	-0.590186	-0.556348	-0.516452	-0.461919	-0.399624	-0.35621	-0.313318	-0.227569	-0.0983033	-0.00285154	-0.0305136	-0.177376	-0.422437	-0.669088	-0.852769	-0.935838	-0.88055	-0.724621	-0.483428	-0.22961	0.0127721	0.179371	0.270268	0.301255	0.286225	0.161828	-0.0293941	-0.216432	-0.317819	-0.260274	-0.107922	0.041922	0.0705349
-0.429677	-0.225605	0.0020759	0.183806	0.273581	0.219167	0.146251	0.0978482	0.0968115	0.189516	0.332885	0.466371	0.622841	0.754151	0.788121	0.6961	0.492864	0.223855	0.0200491	-0.00648291	0.135907	0.349129	0.488489	0.541588	0.570402	0.636737	0.70936	0.741316	0.704386	0.656859	0.52751	0.425119	0.388302	0.388197	0.447318	0.516871	0.533901	0.484357	0.358278	0.139736	-0.0176169	-0.10998	-0.0764472	-0.012354	0.0430093	0.105695	0.155129	0.118452	0.0508146	-0.00352554
0.0295853	0.0948394	0.283492	0.612498	1.01449	1.33709	1.51535	1.49054	1.29459	0.944179	0.606571	0.424795	0.474845	0.747494	1.1755	1.55156	1.76036	1.7827	1.6467	1.35351	0.988874	0.688652	0.52751	0.519579	0.517466	0.492777	0.350622	0.122308	-0.0333307	-0.0346079	0.115521	0.298977	0.453501	0.478336	0.368186	0.160288	-0.0387631	-0.187346	-0.260761	-0.266616	-0.241732	-0.186914	-0.12496	-0.0522766	-0.0186229	0.000428497	-0.00785061	-0.0427984	-0.135458	-0.307622
1.03908	0.880927	0.618437	0.29793	0.0226278	-0.137891	-0.185898	-0.0537513	0.123909	0.209598	0.102956	-0.153549	-0.469444	-0.765457	-0.905126	-0.874762	-0.782933	-0.753791	-0.79802	-0.889046	-1.00978	-1.17264	-1.32431	-1.38972	-1.27536	-1.0159	-0.672801	-0.315576	-0.0941088	-0.0078632	0.0244109	0.0485455	0.056122	0.00356562	-0.105889	-0.23617	-0.336685	-0.37189	-0.269477	-0.0472335	0.247086	0.48935	0.56158	0.43799	0.186485	-0.198901	-0.54854	-0.795014	-0.919691	-0.861634
0.707717	0.762012	0.815377	0.829702	0.766314	0.641028	0.464374	0.303336	0.225066	0.246408	0.259115	0.199257	0.108698	-0.0223375	-0.158214	-0.318901	-0.432114	-0.461986	-0.423529	-0.373251	-0.417596	-0.527166	-0.70711	-0.890845	-1.04186	-1.09284	-0.942856	-0.634447	-0.270219	0.0376832	0.247522	0.299306	0.308121	0.336997	0.388472	0.460542	0.55043	0.643298	0.747668	0.781694	0.729121	0.558107	0.325444	0.0895968	-0.0756903	-0.19714	-0.227134	-0.193876	-0.0708534	0.0964187
-0.556404	-0.44378	-0.248209	-0.0831878	0.0638743	0.163861	0.267485	0.412141	0.565195	0.701212	0.722397	0.693658	0.526121	0.249551	-0.26927	-0.929497	-1.46257	-1.64075	-1.41632	-0.964287	-0.541391	-0.307635	-0.300668	-0.328517	-0.334462	-0.264326	-0.20021	-0.166628	-0.144451	-0.182365	-0.307107	-0.526478	-0.78795	-1.0926	-1.28373	-1.27816	-1.03562	-0.649257	-0.388142	-0.323986	-0.444981	-0.631454	-0.71522	-0.626943	-0.421783	-0.268118	-0.141133	-0.0217706	0.112144	0.247331
0.101031	0.0678742	0.108101	0.227578	0.338486	0.418354	0.444554	0.437199	0.366293	0.230933	0.104022	-0.032991	-0.0904725	-0.071353	0.0225942	0.11608	0.145244	0.136316	0.0937901	0.0779384	0.012244	-0.109586	-0.31268	-0.509039	-0.660401	-0.673912	-0.637089	-0.624986	-0.643886	-0.626602	-0.553653	-0.470303	-0.42872	-0.458049	-0.522955	-0.612542	-0.668067	-0.631228	-0.569426	-0.522677	-0.522505	-0.584285	-0.644516	-0.615909	-0.469927	-0.323086	-0.233172	-0.270868	-0.397215	-0.542011
-0.816845	-0.832007	-0.825075	-0.746419	-0.668933	-0.615157	-0.614979	-0.678888	-0.741195	-0.711602	-0.560589	-0.408688	-0.315675	-0.35467	-0.485371	-0.635157	-0.787659	-0.881206	-0.836422	-0.659655	-0.35836	-0.0259731	0.228057	0.366296	0.460723	0.518508	0.511011	0.412272	0.290019	0.162613	0.0310223	-0.145522	-0.316339	-0.474723	-0.549237	-0.42958	-0.174044	0.057907	0.118524	0.0162154	-0.235213	-0.438849	-0.580487	-0.485799	-0.251202	0.0271595	0.214951	0.291017	0.246234	0.170995
1.19528	1.10804	0.975395	0.809756	0.598865	0.347367	0.0932825	-0.112765	-0.293706	-0.386687	-0.40814	-0.437741	-0.467607	-0.5304	-0.576224	-0.554063	-0.469149	-0.381145	-0.286095	-0.312981	-0.449527	-0.655309	-0.820159	-0.855678	-0.718888	-0.448697	-0.170538	-0.0347241	-0.118471	-0.309201	-0.465597	-0.525141	-0.472371	-0.365235	-0.279066	-0.273207	-0.32339	-0.365024	-0.3419	-0.244651	-0.0992268	0.0164306	0.0361757	-0.112528	-0.379534	-0.629053	-0.709378	-0.629219	-0.440394	-0.245112
-0.453257	-0.515881	-0.530613	-0.520523	-0.534907	-0.563705	-0.626053	-0.671552	-0.649549	-0.565237	-0.477856	-0.38348	-0.410176	-0.545753	-0.750077	-0.913758	-0.949026	-0.813205	-0.54493	-0.268743	-0.133891	-0.217045	-0.406423	-0.561709	-0.620831	-0.568436	-0.462059	-0.376501	-0.370684	-0.42051	-0.461849	-0.43889	-0.34233	-0.197937	-0.0830994	-0.0634943	-0.211143	-0.476257	-0.724007	-0.803762	-0.724172	-0.536685	-0.342788	-0.210375	-0.163885	-0.176713	-0.177369	-0.161668	-0.109123	-0.0139564
-0.666171	-0.642255	-0.611061	-0.543631	-0.411584	-0.236644	-0.0806455	0.00815402	0.0142501	-0.158471	-0.432235	-0.731769	-0.943471	-0.996717	-0.864311	-0.64522	-0.446946	-0.358777	-0.349972	-0.375843	-0.381815	-0.35184	-0.281447	-0.242381	-0.247344	-0.294134	-0.439877	-0.550946	-0.644061	-0.670769	-0.625656	-0.625664	-0.583186	-0.475696	-0.394113	-0.302324	-0.191365	-0.0138478	0.226375	0.497215	0.707701	0.705011	0.478593	0.135764	-0.25251	-0.505177	-0.589909	-0.473569	-0.266453	-0.0650663
0.134865	0.125616	0.184487	0.244483	0.318183	0.336248	0.336889	0.288538	0.222395	0.110243	-0.0291398	-0.169988	-0.263907	-0.26982	-0.212999	-0.134828	-0.0618907	-0.00823568	-0.027027	-0.137959	-0.319565	-0.587036	-0.792816	-0.824234	-0.641773	-0.279713	0.15857	0.54791	0.829221	0.978633	0.963047	0.917456	0.84021	0.804448	0.735777	0.6137	0.472626	0.358641	0.269912	0.182353	0.0593304	-0.106209	-0.161634	-0.0961607	0.0357619	0.211269	0.314298	0.329116	0.205781	0.0324604
0.0751274	-0.02161	-0.130183	-0.143802	-0.176647	-0.2216	-0.287105	-0.300729	-0.252656	-0.258858	-0.316086	-0.434669	-0.44871	-0.324234	-0.0613786	0.235644	0.477305	0.627561	0.701627	0.771529	0.817437	0.792816	0.717777	0.660036	0.688082	0.794717	0.934576	0.984007	0.881118	0.595363	0.203966	-0.14634	-0.345116	-0.338204	-0.189026	0.00191589	0.16188	0.267056	0.34002	0.390936	0.451812	0.493486	0.486933	0.501061	0.518551	0.52663	0.543859	0.631114	0.796105	0.929792
-0.38939	-0.221874	-0.0450193	0.116675	0.245581	0.328747	0.393966	0.439477	0.493892	0.531143	0.525286	0.537914	0.553547	0.560769	0.57617	0.654163	0.801642	0.92114	0.948582	0.894769	0.729329	0.527177	0.372388	0.343961	0.474482	0.636866	0.715841	0.657607	0.472747	0.252442	0.0982732	0.0495197	0.0702495	0.0885956	0.0487507	0.0144085	0.0268719	0.0559081	0.0631625	0.0140136	-0.0354321	-0.0847883	-0.10345	-0.0772095	0.00242242	0.169222	0.297121	0.395592	0.37875	0.311746
-0.192775	-0.238544	-0.369131	-0.474582	-0.558137	-0.572782	-0.509095	-0.392107	-0.306273	-0.286539	-0.376625	-0.527708	-0.655567	-0.713908	-0.673533	-0.565438	-0.437892	-0.319531	-0.333896	-0.442634	-0.535628	-0.533647	-0.391835	-0.127083	0.165747	0.428402	0.556521	0.632192	0.640481	0.627588	0.58634	0.510224	0.414057	0.374843	0.383169	0.357943	0.251904	0.0153981	-0.252935	-0.491932	-0.66149	-0.796874	-0.894665	-0.937054	-0.84881	-0.604911	-0.299885	-0.0567042	0.0298689	-0.0105596
-0.262317	-0.367737	-0.428293	-0.450775	-0.439326	-0.367048	-0.217855	-0.0658584	0.0654171	0.129337	0.190399	0.222685	0.201746	0.182737	0.144415	0.136711	0.120352	0.0658768	0.0289275	-0.0118805	-0.0744982	-0.134979	-0.161817	-0.192643	-0.184548	-0.159611	-0.0892583	-0.0652942	-0.0985071	-0.133797	-0.0496104	0.132152	0.399948	0.648101	0.76106	0.676376	0.444099	0.224684	0.116327	0.0788345	0.053458	-0.0128649	-0.143351	-0.321997	-0.493501	-0.611446	-0.603665	-0.460268	-0.29888	-0.232437
0.332836	0.346894	0.345064	0.282598	0.145202	-0.102114	-0.412525	-0.699893	-0.977909	-1.20999	-1.35925	-1.38878	-1.27981	-1.0766	-0.831798	-0.674633	-0.589392	-0.611785	-0.620882	-0.678158	-0.727091	-0.759535	-0.744623	-0.733574	-0.620857	-0.494027	-0.302039	-0.130647	0.0075109	0.138203	0.215416	0.202657	0.0667444	-0.158092	-0.402322	-0.51853	-0.47651	-0.351315	-0.157025	-0.0221491	-0.00129021	-0.0935122	-0.25072	-0.337157	-0.315185	-0.158621	0.0126437	0.0931266	0.0690203	-0.00783825
0.345566	0.313219	0.326321	0.378509	0.421783	0.401169	0.276644	0.0706476	-0.153118	-0.259589	-0.22109	-0.106386	0.0716244	0.195199	0.21431	0.129816	-0.0142194	-0.0934139	-0.073283	0.0701625	0.227077	0.300816	0.27873	0.208311	0.111478	0.0183501	-0.0602985	-0.137786	-0.175168	-0.185791	-0.118697	-0.0475939	0.0120781	-0.00628434	-0.0103387	0.0349563	0.192738	0.352469	0.449226	0.472567	0.406642	0.285152	0.1279	-0.0123444	-0.130644	-0.212452	-0.210702	-0.139551	-0.0278081	0.0350291
-0.0263562	0.0580857	0.137299	0.224362	0.255992	0.244815	0.233209	0.258333	0.297102	0.372915	0.401672	0.42357	0.489137	0.555357	0.658824	0.753305	0.742257	0.676308	0.540998	0.393699	0.298905	0.324952	0.434362	0.604875	0.770439	0.820654	0.79795	0.705192	0.589482	0.503789	0.468896	0.411714	0.303704	0.139166	-0.0410487	-0.0870026	-0.0140234	0.134568	0.298047	0.42238	0.516975	0.532016	0.470272	0.352078	0.262039	0.263244	0.370116	0.498668	0.578352	0.517608
0.335475	0.454643	0.579928	0.58943	0.533696	0.4207	0.280273	0.176277	0.13393	0.064534	-0.0665471	-0.266231	-0.48494	-0.54071	-0.452142	-0.271811	-0.0734121	0.0774781	0.192278	0.210533	0.1356	-0.00784026	-0.117112	-0.115649	0.0140506	0.170061	0.266766	0.193047	-0.0384032	-0.272594	-0.46478	-0.555987	-0.487394	-0.35092	-0.195366	-0.0868455	-0.0186264	9.88921e-05	0.0818742	0.276766	0.61644	0.836059	0.804123	0.500805	0.0319489	-0.449928	-0.819627	-0.994329	-1.06874	-1.0201
0.122978	0.0706541	0.0640469	0.122335	0.19905	0.212132	0.181695	0.188237	0.280157	0.524071	0.768775	0.946735	1.00896	0.937593	0.825527	0.792995	0.8481	0.921294	0.980003	0.970304	0.958021	0.965993	0.956569	0.915567	0.853925	0.780653	0.653176	0.496347	0.31799	0.112407	-0.101361	-0.273943	-0.405362	-0.556464	-0.691815	-0.780224	-0.727271	-0.599977	-0.373065	-0.0667765	0.279027	0.524016	0.704574	0.735457	0.687632	0.507687	0.243754	-0.103955	-0.419886	-0.597626
0.981299	0.840604	0.727097	0.634647	0.503098	0.349664	0.176997	-0.0220284	-0.228977	-0.396054	-0.52328	-0.669562	-0.800595	-0.886184	-0.834919	-0.711687	-0.492013	-0.195495	0.139277	0.37645	0.551248	0.581147	0.534847	0.360642	0.105129	-0.231488	-0.537341	-0.70941	-0.779761	-0.75692	-0.75026	-0.805569	-0.865394	-0.897911	-0.827619	-0.750929	-0.740012	-0.775991	-0.777315	-0.762079	-0.765994	-0.791852	-0.85112	-0.923118	-0.892394	-0.683074	-0.336607	0.110015	0.484692	0.691433
0.346517	0.0591307	-0.155941	-0.322601	-0.372685	-0.335798	-0.253815	-0.168968	-0.0933712	-0.0525445	-0.0254743	0.0266413	0.123656	0.304018	0.531155	0.725889	0.759822	0.599424	0.335427	0.0700155	-0.0900812	-0.0939688	0.0381309	0.215701	0.33089	0.353027	0.309167	0.298804	0.284796	0.225882	0.0740748	-0.0914174	-0.206732	-0.189599	-0.016229	0.227575	0.358045	0.33821	0.169326	-0.0509495	-0.228878	-0.31544	-0.336026	-0.345767	-0.343925	-0.271508	-0.150088	0.0104079	0.246251	0.476835
0.686723	0.684529	0.640892	0.570397	0.483618	0.45815	0.443996	0.384467	0.231075	0.0638559	-0.0526621	-0.0353507	0.139829	0.386178	0.51801	0.497968	0.327321	0.104746	-0.0750392	-0.162505	-0.183306	-0.193149	-0.191288	-0.118114	0.0045732	0.166744	0.405049	0.638039	0.861873	0.985919	0.99081	0.88637	0.695663	0.485613	0.292261	0.200425	0.213556	0.328642	0.51867	0.71065	0.812454	0.77473	0.675294	0.68241	0.79812	0.984127	1.12575	1.11797	0.935216	0.625355
0.127413	0.24908	0.308347	0.27992	0.139508	-0.0242766	-0.140891	-0.123566	0.0517597	0.298313	0.430255	0.410196	0.239407	0.0166477	-0.163287	-0.250826	-0.271644	-0.281495	-0.279632	-0.206398	-0.0836086	0.0786971	0.3172	0.550384	0.774404	0.898553	0.903448	0.798922	0.608056	0.397831	0.204318	0.112406	0.125548	0.24073	0.430915	0.623056	0.724944	0.687188	0.587669	0.594792	0.710598	0.896759	1.0385	1.03071	0.847808	0.537689	0.202974	-0.0332607	-0.0781287	0.0358319
-0.123881	-0.0635173	0.0558958	0.246998	0.435519	0.536784	0.49603	0.388607	0.396295	0.521299	0.722247	0.875248	0.86684	0.669408	0.334657	-0.0266441	-0.281642	-0.330074	-0.207062	-0.0123514	0.134748	0.173654	0.099836	-0.0575285	-0.187498	-0.248896	-0.240923	-0.21525	-0.210576	-0.252623	-0.292828	-0.348542	-0.41031	-0.442578	-0.409036	-0.345076	-0.26383	-0.174133	-0.109724	-0.0617619	-0.0343174	0.0129048	0.0754488	0.0830446	-0.0249843	-0.281427	-0.690833	-1.17096	-1.52952	-1.69275
0.525826	0.533112	0.519498	0.504186	0.48982	0.449534	0.342183	0.159086	-0.0671097	-0.288419	-0.394028	-0.340374	-0.119647	0.119174	0.339976	0.442256	0.469892	0.553634	0.751433	0.99602	1.1492	1.13119	0.923551	0.624496	0.304125	0.00523571	-0.172511	-0.240198	-0.227185	-0.144125	-0.0825781	-0.0458496	-0.0234684	-0.0747788	-0.14015	-0.143354	-0.114493	-0.0768978	-0.029933	0.0845595	0.21304	0.290813	0.263172	0.200159	0.114004	0.054962	0.0885543	0.192677	0.327933	0.420479
0.804487	0.730503	0.645828	0.524071	0.368172	0.220974	0.0935378	0.0752581	0.126239	0.245885	0.396044	0.60796	0.819098	1.05437	1.2455	1.33497	1.29145	1.11637	0.863462	0.536923	0.290491	0.119872	0.00769042	-0.0507547	-0.0465954	-0.0179072	-0.0239507	-0.0771521	-0.136672	-0.152371	-0.153476	-0.12588	-0.0745519	-0.118839	-0.282855	-0.541432	-0.777691	-0.934034	-0.974335	-0.925631	-0.840364	-0.766328	-0.685288	-0.545283	-0.406977	-0.315635	-0.306945	-0.352003	-0.413611	-0.448936
-0.565219	-0.556938	-0.544181	-0.561839	-0.592341	-0.567387	-0.48853	-0.382504	-0.263722	-0.151294	-0.0335273	0.034076	-0.0072046	-0.149621	-0.317907	-0.461329	-0.550856	-0.609354	-0.707042	-0.83242	-0.942406	-1.00404	-1.00287	-0.875427	-0.673424	-0.458187	-0.314736	-0.23669	-0.314755	-0.522077	-0.790244	-1.00636	-1.16071	-1.2411	-1.16384	-0.943386	-0.622913	-0.27969	0.0641588	0.291285	0.328776	0.11761	-0.216434	-0.577278	-0.912472	-1.1836	-1.39582	-1.54591	-1.63742	-1.56597
-0.270773	-0.251204	-0.296261	-0.301969	-0.252947	-0.186456	-0.177491	-0.25833	-0.414973	-0.568837	-0.68271	-0.716312	-0.71793	-0.685498	-0.571056	-0.387304	-0.204007	-0.0330484	0.108677	0.176868	0.115207	-0.021619	-0.165703	-0.256933	-0.264107	-0.215463	-0.151465	-0.0485195	0.0948938	0.30826	0.527846	0.676082	0.706021	0.659483	0.667025	0.725033	0.756042	0.712864	0.664146	0.63487	0.661259	0.754843	0.818964	0.739481	0.507061	0.289586	0.124296	0.0620798	0.00150384	-0.023003
0.383997	0.167919	-0.0219677	-0.178009	-0.267499	-0.269487	-0.22027	-0.155519	-0.05136	0.093743	0.309623	0.531797	0.681779	0.712071	0.664984	0.672616	0.731307	0.762681	0.718995	0.669703	0.640082	0.666781	0.761468	0.826345	0.745925	0.510767	0.290729	0.123491	0.0605424	-0.000747299	-0.0255429	-0.0300257	0.0515993	0.186228	0.346058	0.443143	0.48561	0.46086	0.36672	0.206987	0.0359676	-0.103064	-0.154258	-0.00503027	0.288972	0.633391	0.80767	0.80257	0.716025	0.67523
0.888255	0.773961	0.713439	0.694894	0.733083	0.840357	0.908052	0.824139	0.578765	0.349169	0.174666	0.108983	0.0450307	0.019158	0.0144805	0.0996513	0.240128	0.406901	0.508204	0.552515	0.52669	0.428461	0.261789	0.0833405	-0.0617305	-0.115149	0.0405617	0.347336	0.706716	0.888565	0.883244	0.79294	0.750373	0.786198	0.931545	1.15313	1.33749	1.37845	1.25062	1.06436	0.913822	0.824917	0.7894	0.79334	0.760198	0.618292	0.386754	0.202416	0.0865366	0.0401173
0.257243	0.355617	0.473628	0.640001	0.844475	1.00867	1.04559	0.930362	0.762449	0.62675	0.546606	0.51459	0.518141	0.488265	0.360344	0.151623	-0.0145483	-0.119008	-0.160853	-0.108867	-0.0874601	-0.0659568	-0.0411457	0.0555133	0.222009	0.399104	0.541282	0.610486	0.600404	0.519382	0.422802	0.303183	0.253912	0.302482	0.361613	0.422827	0.470111	0.487436	0.486336	0.537434	0.614992	0.730533	0.778168	0.743167	0.625341	0.47755	0.454936	0.516801	0.687702	0.85078
-0.149542	-0.167559	-0.0674026	0.0820796	0.240221	0.265116	0.169248	0.0643793	-0.0611457	-0.168425	-0.241679	-0.374542	-0.493389	-0.572426	-0.61002	-0.576567	-0.524198	-0.456758	-0.361472	-0.386031	-0.424823	-0.491427	-0.615157	-0.812269	-1.02374	-1.12223	-1.02478	-0.789479	-0.501814	-0.234449	-0.0884735	-0.0180156	-0.045443	-0.0933095	-0.176192	-0.258866	-0.246224	-0.174017	-0.177524	-0.25002	-0.39579	-0.652645	-0.880292	-1.05163	-1.12814	-1.05794	-0.96736	-0.788294	-0.498457	-0.258715
0.292928	0.169463	0.0255362	-0.125963	-0.288155	-0.432504	-0.508813	-0.537622	-0.469555	-0.380437	-0.300906	-0.292979	-0.350966	-0.419067	-0.425029	-0.398785	-0.348019	-0.243759	-0.0855967	0.0296734	0.0931462	0.130183	0.0743329	-0.047049	-0.212861	-0.326516	-0.378721	-0.341361	-0.264688	-0.185028	-0.122439	-0.0774403	-0.082488	-0.195089	-0.315443	-0.399913	-0.370277	-0.261813	-0.135817	-0.0824611	-0.153145	-0.233717	-0.294361	-0.272482	-0.199049	-0.0810643	0.0543472	0.193836	0.211902	0.107461
-0.37089	-0.216415	-0.0849142	0.00643863	0.0727269	0.121119	0.116027	0.00244636	-0.118955	-0.20416	-0.174266	-0.0648582	0.062234	0.116054	0.0447549	-0.0365175	-0.0976897	-0.0756205	-0.00154801	0.117463	0.254053	0.394755	0.412979	0.307628	0.112618	-0.138404	-0.333135	-0.47849	-0.446918	-0.311131	-0.106491	0.10179	0.173848	0.119074	-0.0791389	-0.279108	-0.387171	-0.378698	-0.272365	-0.0458001	0.162873	0.278094	0.306242	0.232983	0.159376	0.201902	0.433429	0.753127	0.977835	0.924796
0.200982	0.242628	0.203669	0.0701912	-0.0366382	-0.108369	-0.0846497	-0.00503999	0.122868	0.269668	0.420889	0.440474	0.327248	0.11766	-0.152126	-0.361414	-0.517635	-0.483703	-0.337765	-0.117828	0.106023	0.183467	0.124599	-0.0884311	-0.303349	-0.41949	-0.410384	-0.296102	-0.0526001	0.171672	0.295506	0.325758	0.247023	0.167913	0.213619	0.462453	0.80605	1.04756	0.990551	0.686119	0.289479	0.0100128	-0.0538437	0.107149	0.379304	0.563715	0.665388	0.649551	0.569909	0.44674
0.560444	0.626112	0.628063	0.53113	0.337386	0.136909	-0.0461617	-0.165887	-0.206692	-0.109052	0.071784	0.230331	0.269539	0.174081	-0.00346122	-0.0971968	-0.0288012	0.140606	0.406913	0.708598	0.929461	0.943888	0.808288	0.519207	0.18739	-0.13477	-0.342399	-0.470875	-0.513677	-0.447675	-0.312058	-0.130357	0.0187123	0.173855	0.308864	0.342884	0.287928	0.104305	-0.122815	-0.332127	-0.448773	-0.421961	-0.288797	-0.0441023	0.182302	0.356471	0.429928	0.413735	0.337018	0.2136
-0.216122	-0.182459	-0.14859	-0.181754	-0.212345	-0.236495	-0.15079	-0.00407458	0.156007	0.27298	0.295017	0.257915	0.181986	0.124604	0.0984042	0.0670543	0.0243243	-0.0272166	-0.0458582	-0.0490476	-0.0368528	-0.0133902	-0.00192552	0.0210614	0.0231849	-0.00504354	-0.0717142	-0.161913	-0.245002	-0.258226	-0.249053	-0.225687	-0.240514	-0.235865	-0.191724	-0.151512	-0.100444	-0.0759593	-0.0798235	-0.0720283	-0.057699	-0.0867886	-0.186196	-0.310017	-0.426067	-0.495155	-0.494769	-0.498482	-0.505391	-0.52458
0.135386	0.0856801	0.0383303	-0.0193026	-0.0380304	-0.0394848	-0.0267207	-0.00216267	0.00983721	0.0338973	0.0361199	0.00657363	-0.0632096	-0.157619	-0.244588	-0.258429	-0.248827	-0.22437	-0.239889	-0.235023	-0.188822	-0.146733	-0.0932803	-0.0676529	-0.0716974	-0.0635383	-0.04854	-0.0789877	-0.183036	-0.312638	-0.434106	-0.506419	-0.506014	-0.509901	-0.517133	-0.537217	-0.514696	-0.428411	-0.338728	-0.246523	-0.144488	-0.0219341	0.0968691	0.201454	0.243338	0.216231	0.0899258	0.0179947	0.0315365	0.0901189
-0.198212	-0.11731	-0.0765799	-0.0242948	-0.00423759	-0.0159534	-0.00631256	0.0114094	-0.0245676	-0.147511	-0.300649	-0.444176	-0.529621	-0.529143	-0.533736	-0.54228	-0.566012	-0.539401	-0.437447	-0.331477	-0.222527	-0.101962	0.042847	0.183225	0.306802	0.356293	0.324263	0.175021	0.090027	0.106028	0.175249	0.271557	0.283291	0.184581	0.00981499	-0.204606	-0.390809	-0.517722	-0.651838	-0.768111	-0.917973	-1.02154	-0.983775	-0.763376	-0.486199	-0.225416	-0.0394192	0.0106123	0.0221338	-0.0128089
0.699314	0.391297	0.100494	-0.169477	-0.378673	-0.524947	-0.670809	-0.797265	-0.960251	-1.07288	-1.03182	-0.792115	-0.490664	-0.207041	-0.00475498	0.0496582	0.0621888	0.0241858	-0.055786	-0.147228	-0.240718	-0.285806	-0.248102	-0.114274	0.0672066	0.234702	0.318595	0.339014	0.4672	0.701503	1.00319	1.22032	1.20503	0.962222	0.685816	0.529005	0.588078	0.797181	1.01609	1.11782	1.02834	0.739923	0.41618	0.160311	0.0611204	0.0950208	0.162484	0.276104	0.365834	0.523714
0.487398	0.837157	1.1466	1.33645	1.30423	1.06628	0.802946	0.653548	0.709828	0.909046	1.1176	1.21453	1.12928	0.854495	0.546057	0.302284	0.207783	0.240081	0.304354	0.412603	0.498091	0.648507	0.860831	1.04689	1.15122	1.16489	1.09139	0.866464	0.53756	0.152965	-0.117182	-0.261895	-0.236273	-0.0897631	0.0853218	0.203495	0.228225	0.13949	0.0489622	-0.00313909	0.0210769	0.0784705	0.124609	0.124036	0.0919341	0.119817	0.223038	0.396332	0.567718	0.693208
0.787262	0.628978	0.440439	0.27678	0.185571	0.118144	0.105126	0.146153	0.19743	0.257236	0.31105	0.374837	0.483362	0.656976	0.900348	1.2272	1.48316	1.54917	1.45856	1.24365	1.0568	0.955476	0.876317	0.750739	0.557796	0.306422	0.121043	0.0671166	0.164127	0.369621	0.570223	0.697798	0.748055	0.777436	0.845179	0.937545	1.02335	1.12122	1.21058	1.28919	1.25825	1.12005	0.883535	0.66188	0.466014	0.318341	0.19349	0.0611044	-0.0220483	-0.00976372
-0.421991	-0.347763	-0.112505	0.264901	0.702939	1.04733	1.2499	1.29509	1.22817	1.17416	1.13097	1.15114	1.21024	1.28231	1.35188	1.38444	1.25283	1.00586	0.772656	0.668167	0.74531	0.947744	1.20416	1.36761	1.49867	1.57203	1.64357	1.75482	1.8505	1.8814	1.82091	1.68623	1.5664	1.53186	1.5523	1.55775	1.56479	1.55209	1.52	1.51988	1.53032	1.63479	1.75689	1.80346	1.68683	1.53309	1.48806	1.54237	1.69216	1.8717
1.10269	1.25934	1.34605	1.38529	1.35596	1.26293	1.20986	1.16742	1.18724	1.24531	1.31613	1.38449	1.41649	1.28716	1.04449	0.815346	0.712675	0.788476	0.987387	1.23934	1.39995	1.52872	1.60081	1.67111	1.78042	1.87444	1.9048	1.84536	1.71302	1.59527	1.56134	1.58142	1.58678	1.59369	1.58122	1.54968	1.54957	1.55982	1.66247	1.78245	1.82821	1.71361	1.56255	1.5183	1.57167	1.71885	1.89527	1.99042	1.9901	1.97938
-0.520003	-0.581964	-0.661698	-0.761941	-0.873807	-0.985059	-1.12048	-1.17707	-1.11648	-0.964506	-0.826679	-0.734235	-0.631605	-0.518204	-0.43587	-0.488133	-0.705009	-1.05754	-1.32481	-1.37607	-1.13418	-0.782284	-0.519873	-0.463476	-0.615673	-0.873373	-1.10805	-1.23788	-1.26714	-1.16961	-1.06881	-0.960311	-0.94727	-0.97616	-1.01192	-0.972289	-0.842243	-0.691802	-0.583082	-0.571681	-0.617995	-0.644094	-0.644331	-0.635276	-0.663586	-0.731957	-0.827051	-0.898166	-0.879645	-0.771968
-0.564881	-0.729653	-0.851625	-0.910303	-0.906944	-0.809986	-0.714661	-0.612043	-0.599709	-0.627032	-0.660852	-0.623371	-0.50038	-0.3581	-0.255277	-0.244495	-0.288296	-0.31298	-0.313204	-0.30464	-0.331414	-0.396076	-0.486012	-0.553269	-0.535753	-0.433917	-0.266362	-0.148382	-0.110941	-0.152619	-0.21431	-0.233462	-0.130865	0.0509425	0.249777	0.38298	0.401707	0.407138	0.332281	0.266368	0.240813	0.286332	0.401557	0.579313	0.697381	0.716124	0.559711	0.196091	-0.227243	-0.586386
0.566224	0.395276	0.185027	-0.0243759	-0.151325	-0.214176	-0.216255	-0.201713	-0.216233	-0.219808	-0.142404	0.0188534	0.228824	0.406901	0.488868	0.464902	0.369759	0.216143	0.10499	0.0647836	0.135914	0.195144	0.244275	0.221938	0.176942	0.135429	0.0954503	0.0379453	-0.0966601	-0.236928	-0.35259	-0.414136	-0.399448	-0.317393	-0.154561	0.0560926	0.260156	0.365767	0.344975	0.272791	0.227396	0.212652	0.202558	0.197182	0.201336	0.223651	0.227877	0.15283	0.0478245	-0.0357625
0.165972	0.138352	0.0676452	0.00397211	-0.0439793	-0.0841103	-0.151107	-0.307931	-0.471352	-0.606106	-0.67781	-0.660697	-0.565098	-0.375389	-0.129964	0.107782	0.230826	0.206602	0.122503	0.0696153	0.0524371	0.0406767	0.0344131	0.0392537	0.0652513	0.0701755	-0.0172587	-0.139597	-0.236981	-0.222459	-0.0744953	0.134168	0.307447	0.40668	0.545743	0.660279	0.772339	0.879146	0.875292	0.82002	0.752599	0.735573	0.780815	0.800227	0.867446	0.975528	1.04356	0.986588	0.871262	0.746197
0.609082	0.553009	0.467731	0.345411	0.191253	0.053776	-0.0969397	-0.212021	-0.261438	-0.293464	-0.313506	-0.323428	-0.338521	-0.323618	-0.279366	-0.282646	-0.335826	-0.463392	-0.643143	-0.801545	-0.872025	-0.826695	-0.693257	-0.526813	-0.425205	-0.359945	-0.332026	-0.294106	-0.208007	-0.155414	-0.166623	-0.240325	-0.379289	-0.459657	-0.421757	-0.24586	0.0152627	0.2616	0.414942	0.541784	0.622772	0.611381	0.515935	0.361628	0.16336	-0.03772	-0.250067	-0.427216	-0.574371	-0.648669
-0.144314	-0.107199	-0.111891	-0.160692	-0.252539	-0.39837	-0.478979	-0.440965	-0.264542	-0.00263804	0.244436	0.398237	0.525459	0.606689	0.595263	0.499532	0.344764	0.145902	-0.0557792	-0.268762	-0.44644	-0.594036	-0.668556	-0.669248	-0.613589	-0.515263	-0.410052	-0.307265	-0.188158	-0.0364613	0.147356	0.353552	0.569259	0.788751	0.92663	0.945774	0.786853	0.580319	0.374186	0.198693	0.0982871	-0.00327259	-0.0704479	-0.0856354	-0.0194997	0.0602029	0.0750528	0.0778747	0.0930352	0.0801852
0.296403	0.137364	0.0453651	0.0531944	0.182717	0.379249	0.573439	0.665475	0.635423	0.509351	0.352088	0.219845	0.124616	0.0633838	0.0353826	-0.0230167	-0.0808175	-0.0636647	0.0664112	0.259978	0.469113	0.670139	0.821224	0.892327	0.920837	0.947797	0.966219	0.938322	0.803287	0.632844	0.514879	0.500684	0.605335	0.754008	0.859481	0.860996	0.777108	0.694836	0.63727	0.580853	0.443374	0.300491	0.137123	0.0255324	-0.0269895	-0.0191751	0.0148559	0.0446959	0.101441	0.176217
0.326564	0.375723	0.387162	0.254072	0.00292906	-0.308019	-0.482438	-0.545321	-0.564988	-0.60348	-0.693653	-0.809586	-0.893388	-0.849209	-0.716911	-0.545734	-0.430911	-0.36694	-0.350022	-0.416181	-0.506749	-0.62338	-0.706372	-0.735099	-0.695352	-0.674792	-0.701497	-0.773708	-0.853857	-0.902358	-0.958127	-1.02076	-1.08966	-1.14735	-1.11093	-0.934165	-0.63503	-0.38401	-0.264539	-0.226317	-0.180576	-0.0877875	0.0398922	0.123724	0.112684	0.0147684	-0.114604	-0.205396	-0.229798	-0.202014
-0.116122	-0.144461	-0.229471	-0.318099	-0.425146	-0.502081	-0.52856	-0.491925	-0.472974	-0.497588	-0.564148	-0.638023	-0.682728	-0.734132	-0.791858	-0.855372	-0.908547	-0.874972	-0.712045	-0.436324	-0.204952	-0.0948325	-0.0596019	-0.0174414	0.0680847	0.185771	0.263041	0.252865	0.162613	0.0433669	-0.0403182	-0.0628105	-0.0372011	0.0486558	0.0785706	0.105917	0.0609642	0.016251	-0.0343646	-0.116087	-0.178399	-0.244073	-0.279041	-0.311928	-0.281032	-0.212273	-0.0702443	0.0712361	0.189795	0.250321
0.93339	0.828719	0.704231	0.545064	0.460707	0.475921	0.603214	0.770001	0.922411	0.894943	0.715534	0.481501	0.351811	0.4006	0.547608	0.707917	0.739998	0.65854	0.464993	0.300163	0.21081	0.267369	0.393504	0.524745	0.673894	0.801889	0.889519	0.862757	0.746981	0.556345	0.367975	0.232428	0.186359	0.168001	0.128873	-0.0173875	-0.239738	-0.404032	-0.445744	-0.368724	-0.192036	0.0349192	0.257349	0.415284	0.52568	0.596337	0.593529	0.454792	0.215064	-0.0874248
-0.32443	-0.152502	0.000838301	0.10633	0.198116	0.25935	0.256441	0.112698	-0.135681	-0.449085	-0.742081	-0.923617	-0.941142	-0.869295	-0.723111	-0.574726	-0.400304	-0.20583	0.0225238	0.222429	0.2902	0.293621	0.22582	0.180377	0.093956	0.0155487	0.041162	0.137635	0.242548	0.228668	0.160103	0.0930509	0.0887042	0.137661	0.154231	0.121373	-0.00952433	-0.110437	-0.255195	-0.359152	-0.480178	-0.559877	-0.556227	-0.436942	-0.239621	-0.0421904	0.0508467	0.0324508	0.0164303	0.0908968
-0.0910971	0.0235271	0.101626	0.0886197	0.0420267	0.0774434	0.172422	0.275708	0.262044	0.194541	0.128528	0.124249	0.172447	0.18876	0.156411	0.0275427	-0.0718061	-0.214321	-0.316666	-0.435816	-0.51428	-0.510686	-0.39325	-0.198987	-0.00461713	0.086978	0.0688672	0.053095	0.126407	0.21636	0.26487	0.176181	-0.0764034	-0.371443	-0.595824	-0.62457	-0.515202	-0.388017	-0.271632	-0.263596	-0.333826	-0.371869	-0.340377	-0.22713	-0.0583703	0.126079	0.317033	0.452049	0.451699	0.333122
0.387433	0.370054	0.299978	0.209748	0.0565368	-0.0536956	-0.195209	-0.296835	-0.415148	-0.49306	-0.489492	-0.372881	-0.179983	0.0130213	0.103973	0.0859892	0.0703279	0.143125	0.232445	0.280615	0.192549	-0.0582606	-0.351227	-0.574031	-0.602575	-0.493976	-0.367684	-0.252118	-0.244138	-0.313875	-0.35165	-0.320379	-0.207928	-0.0403542	0.142799	0.332411	0.466478	0.466131	0.348387	0.148063	-0.0266688	-0.0803334	0.0397415	0.253261	0.38842	0.360197	0.193441	-0.00586133	-0.114626	-0.0789241
0.208125	0.115261	0.0944084	0.188337	0.283808	0.336996	0.251986	0.00987841	-0.272924	-0.487998	-0.515551	-0.41072	-0.28881	-0.177253	-0.16955	-0.236867	-0.273332	-0.243146	-0.134596	0.0271635	0.203962	0.386995	0.516412	0.516076	0.402418	0.209044	0.0403741	-0.0114286	0.10448	0.310592	0.441062	0.413817	0.252848	0.0604597	-0.0445316	-0.0100682	0.126147	0.247504	0.30007	0.280013	0.165307	0.0135063	-0.0816362	-0.107183	-0.128122	-0.192945	-0.232363	-0.186841	-0.032513	0.256704
0.704788	0.313896	-0.1084	-0.445424	-0.578332	-0.485287	-0.248427	0.0405489	0.288995	0.43514	0.41766	0.303514	0.0628829	-0.100348	-0.123022	0.0437312	0.264681	0.42379	0.412387	0.225671	0.0400074	-0.105829	-0.165515	-0.198731	-0.220286	-0.230879	-0.257866	-0.280707	-0.245147	-0.189176	-0.0488241	0.0990624	0.205069	0.234288	0.0353668	-0.316098	-0.706191	-0.990808	-1.07348	-0.976633	-0.844124	-0.737849	-0.737141	-0.836759	-0.958786	-1.00852	-0.912314	-0.658963	-0.389738	-0.16508
-0.0991697	0.0491508	0.14242	0.162905	-0.0322734	-0.366131	-0.742328	-1.01681	-1.09653	-1.00314	-0.875347	-0.772857	-0.772175	-0.868245	-0.985925	-1.03389	-0.941108	-0.696782	-0.437147	-0.220492	-0.12355	-0.187012	-0.297442	-0.37049	-0.36798	-0.282051	-0.085854	0.165623	0.355995	0.460825	0.483617	0.53186	0.636326	0.728795	0.785136	0.758389	0.64187	0.485258	0.347286	0.245837	0.217068	0.210763	0.215581	0.289157	0.409416	0.573063	0.782772	1.00706	1.2189	1.30695
0.393406	0.326227	0.235766	0.19829	0.209917	0.317893	0.482557	0.612907	0.621221	0.503803	0.369765	0.328456	0.40707	0.538606	0.668176	0.778402	0.811311	0.785753	0.732834	0.712682	0.703552	0.729883	0.836264	1.00523	1.13145	1.14372	1.07604	1.04738	1.16193	1.39849	1.62034	1.71723	1.59332	1.32108	1.1134	1.03255	1.12171	1.32778	1.49078	1.5972	1.61844	1.52505	1.38499	1.21348	1.09186	1.01122	0.988479	1.01069	1.04538	1.10969
0.450478	0.222501	-0.0662963	-0.420275	-0.727528	-0.945971	-1.00918	-0.891828	-0.743862	-0.651314	-0.669606	-0.836655	-1.02581	-1.13631	-1.14942	-1.01259	-0.810978	-0.630486	-0.414911	-0.23305	-0.0993026	-0.0610129	-0.0339766	0.0029652	0.0393217	-0.0586895	-0.254737	-0.469104	-0.670865	-0.802456	-0.770846	-0.614911	-0.404361	-0.23605	-0.165339	-0.102111	-0.0771269	0.0405022	0.216371	0.4065	0.481175	0.400307	0.237528	0.146125	0.137705	0.264337	0.438079	0.571948	0.671963	0.805251
0.0314526	0.0915881	0.247295	0.427462	0.602269	0.673475	0.600646	0.454049	0.371731	0.364149	0.478193	0.634664	0.755226	0.845299	0.965337	1.10856	1.23103	1.26816	1.24704	1.26546	1.23948	1.13842	0.969788	0.80825	0.673322	0.680538	0.772228	0.926686	1.00186	0.966049	0.914721	0.840444	0.790695	0.776961	0.75742	0.75318	0.754138	0.76541	0.775556	0.741099	0.675831	0.588935	0.52719	0.510116	0.470864	0.360697	0.204986	0.0463178	0.0465338	0.177161
-0.576892	-0.480471	-0.405603	-0.359273	-0.31299	-0.18538	-0.00707577	0.180957	0.319854	0.366123	0.376324	0.373261	0.384402	0.408829	0.399614	0.318697	0.289553	0.219588	0.206773	0.224187	0.26215	0.279366	0.277705	0.277841	0.304154	0.374857	0.472125	0.580026	0.725522	0.872564	1.0098	1.10581	1.15587	1.18119	1.11744	0.988472	0.918923	0.903756	0.899214	0.900822	0.858093	0.870311	0.924344	0.982959	1.04195	1.08191	1.08454	1.01706	0.89732	0.747194
0.34642	0.55194	0.70579	0.793026	0.831252	0.80097	0.813455	0.868666	0.92856	0.98884	1.02967	1.03236	0.963408	0.841053	0.687653	0.529481	0.353336	0.24182	0.220203	0.280378	0.393845	0.542821	0.637582	0.596222	0.475494	0.374856	0.378509	0.515149	0.774717	1.05875	1.24315	1.33098	1.29946	1.23568	1.16478	1.09472	1.00263	0.936137	0.961821	1.02521	1.11617	1.09963	1.05647	0.971922	0.917048	0.902859	0.844337	0.781748	0.697952	0.638316
-0.778819	-0.777889	-0.754954	-0.715062	-0.696374	-0.664956	-0.569764	-0.346016	-0.127278	0.00745179	-0.0623997	-0.214317	-0.409907	-0.597943	-0.752142	-0.879624	-0.915754	-0.895737	-0.805168	-0.704577	-0.600845	-0.479481	-0.346375	-0.21131	-0.151459	-0.181451	-0.287178	-0.440164	-0.597967	-0.775954	-0.952794	-1.13161	-1.24966	-1.34833	-1.40779	-1.42504	-1.37087	-1.19957	-1.03992	-0.941973	-0.951475	-0.971481	-0.977946	-0.896249	-0.745784	-0.52736	-0.35423	-0.214769	-0.234354	-0.40969
0.607782	0.664452	0.687961	0.648034	0.650987	0.689293	0.879884	1.09353	1.28327	1.38368	1.29867	1.1363	1.02586	0.981604	1.01815	1.06589	1.08918	1.10942	0.986047	0.747337	0.436076	0.0731543	-0.282542	-0.515613	-0.585402	-0.491591	-0.313944	-0.14591	-0.0477048	-0.0758027	-0.204498	-0.351689	-0.461659	-0.513758	-0.622329	-0.764646	-0.860439	-0.779146	-0.623064	-0.40179	-0.226006	-0.110533	-0.0316102	0.0918282	0.238706	0.367804	0.456364	0.489994	0.564396	0.684631
0.14525	0.172744	0.239147	0.264519	0.262246	0.244922	0.206338	0.178832	0.162272	0.129015	0.0373407	-0.102262	-0.282337	-0.400387	-0.39394	-0.260754	-0.0349822	0.242389	0.505218	0.702719	0.809132	0.859244	0.861052	0.811291	0.716687	0.61287	0.523022	0.482263	0.496515	0.519234	0.533845	0.564717	0.578095	0.60347	0.606383	0.603831	0.594195	0.605516	0.57411	0.464424	0.286851	0.12357	0.0407833	0.0515098	0.0974934	0.143996	0.225007	0.235374	0.277485	0.302401
-0.389084	-0.335957	-0.276701	-0.309021	-0.487837	-0.74115	-0.907925	-0.931405	-0.795463	-0.569569	-0.351015	-0.151874	-0.0362842	0.129754	0.388714	0.633697	0.797124	0.884828	0.853585	0.754602	0.598011	0.45055	0.351667	0.297306	0.319893	0.38529	0.454037	0.359812	0.123445	-0.167401	-0.365331	-0.439966	-0.401934	-0.309325	-0.18885	-0.106369	0.0171663	0.048698	0.00309456	-0.189647	-0.439592	-0.639959	-0.746993	-0.764038	-0.732528	-0.68873	-0.657073	-0.616609	-0.548763	-0.405347
0.757129	0.695452	0.504806	0.239591	-0.0319946	-0.212238	-0.277331	-0.244161	-0.163392	-0.05832	0.0136167	0.121358	0.148858	0.109085	-0.0590149	-0.277004	-0.451755	-0.545105	-0.55997	-0.532489	-0.49429	-0.466681	-0.43139	-0.372219	-0.247138	-0.101988	-0.0129698	-0.0570995	-0.201598	-0.425688	-0.661428	-0.804049	-0.805666	-0.754622	-0.67182	-0.62781	-0.595372	-0.615223	-0.640757	-0.634647	-0.608159	-0.558993	-0.469325	-0.353206	-0.21839	-0.110522	-0.0481758	-0.114603	-0.306623	-0.596226
-1.162	-1.16724	-1.15995	-1.06553	-0.958295	-0.87126	-0.827192	-0.750767	-0.626895	-0.465511	-0.281997	-0.152201	-0.094363	-0.102832	-0.133101	-0.158416	-0.205686	-0.308353	-0.4089	-0.460201	-0.399514	-0.248734	-0.102044	-0.0459745	-0.130711	-0.296466	-0.418752	-0.444569	-0.305946	-0.137308	-0.0238234	-0.0205821	-0.133893	-0.238125	-0.289843	-0.233537	-0.117052	-0.022457	0.00266329	-0.0553413	-0.179418	-0.290688	-0.348262	-0.32282	-0.24696	-0.154109	-0.0489963	0.025671	0.0139007	-0.060003
-0.166556	-0.225473	-0.218844	-0.104708	0.0836415	0.255991	0.319883	0.223323	0.0344397	-0.104909	-0.134328	0.0236374	0.215806	0.345125	0.348818	0.219697	0.100921	0.0419874	0.10615	0.238888	0.346682	0.375307	0.309209	0.16782	0.0410246	-0.0245827	0.00440927	0.090854	0.196661	0.31644	0.401525	0.388113	0.303897	0.175912	0.0249672	-0.0715719	-0.175773	-0.22965	-0.213111	-0.135816	0.0407904	0.288254	0.590044	0.910534	1.09965	1.08545	0.907907	0.728322	0.638866	0.720675
0.147721	0.268771	0.392418	0.463644	0.473302	0.385816	0.232671	0.0953332	0.0242709	0.0556735	0.149306	0.26391	0.393647	0.485808	0.47128	0.380062	0.241435	0.0779407	-0.0266251	-0.139491	-0.197847	-0.179932	-0.0962103	0.0950795	0.363119	0.690001	1.03714	1.24198	1.2266	1.03429	0.839775	0.742882	0.831493	1.10831	1.46203	1.80222	1.99314	1.98252	1.80518	1.46459	1.04877	0.665091	0.346858	0.0753843	-0.145392	-0.319483	-0.391033	-0.280823	0.0132609	0.435503
-0.254251	-0.433388	-0.584452	-0.672773	-0.653468	-0.525143	-0.378176	-0.238841	-0.191081	-0.251237	-0.381965	-0.480396	-0.403477	-0.176127	0.0359972	0.112093	-0.0198085	-0.286148	-0.512115	-0.656301	-0.719482	-0.714159	-0.626162	-0.552732	-0.518301	-0.495804	-0.481169	-0.463827	-0.45852	-0.477287	-0.573618	-0.65514	-0.682207	-0.597395	-0.410119	-0.186931	-0.0207342	0.0205605	-0.0680169	-0.237666	-0.404878	-0.490696	-0.422229	-0.305379	-0.215505	-0.223257	-0.31943	-0.518623	-0.688066	-0.791441
0.395775	0.565996	0.708655	0.862602	0.988444	1.0285	0.942824	0.756951	0.531932	0.350728	0.26293	0.342091	0.551899	0.838677	1.12316	1.34921	1.45376	1.40959	1.26287	1.09482	0.951339	0.812925	0.677989	0.51617	0.34967	0.207187	0.206222	0.324058	0.442028	0.495471	0.511162	0.506281	0.512901	0.505055	0.482412	0.471086	0.478028	0.48674	0.391668	0.173395	-0.0887062	-0.301427	-0.38902	-0.263452	0.0104517	0.345747	0.623945	0.783019	0.789733	0.64289
-0.370717	-0.12516	0.120481	0.320299	0.439064	0.424547	0.271132	0.0200173	-0.250266	-0.451761	-0.501457	-0.399479	-0.162651	0.0795302	0.218182	0.244241	0.257079	0.270758	0.337399	0.377463	0.318805	0.154852	-0.0492979	-0.259938	-0.369391	-0.29866	-0.106653	0.135808	0.355484	0.483228	0.579695	0.639649	0.687177	0.669639	0.630054	0.608119	0.632315	0.660309	0.628622	0.479959	0.227946	-0.0336111	-0.15715	-0.0156913	0.204717	0.424399	0.595257	0.702848	0.780528	0.88357
-0.199305	0.0139429	0.195875	0.364327	0.459541	0.542959	0.606294	0.656502	0.637975	0.596158	0.572986	0.598547	0.628118	0.594646	0.437598	0.171375	-0.104931	-0.235436	-0.0860009	0.146836	0.378906	0.559398	0.673057	0.755117	0.86397	0.981003	1.08734	1.09336	1.08411	1.07011	1.00615	0.862867	0.614593	0.352098	0.191889	0.169077	0.277607	0.37811	0.393191	0.315902	0.209131	0.178079	0.199288	0.286274	0.330637	0.360996	0.395356	0.478058	0.531059	0.589212
0.822406	0.785984	0.718627	0.635347	0.480367	0.321563	0.21867	0.23089	0.309465	0.472951	0.630022	0.676183	0.643034	0.562271	0.469495	0.373253	0.310878	0.254003	0.240573	0.204656	0.183113	0.172745	0.198722	0.307531	0.395691	0.339529	0.0462816	-0.301327	-0.597629	-0.762876	-0.792251	-0.708659	-0.628973	-0.611174	-0.583433	-0.516716	-0.432606	-0.407622	-0.44843	-0.523916	-0.553942	-0.531526	-0.487097	-0.40323	-0.353772	-0.335525	-0.307433	-0.259231	-0.224047	-0.164681
1.12015	0.919185	0.754071	0.621421	0.505669	0.405172	0.340583	0.281688	0.26778	0.230588	0.20828	0.197544	0.224443	0.337117	0.428407	0.370251	0.0665894	-0.293364	-0.600188	-0.771303	-0.801722	-0.715161	-0.632645	-0.614214	-0.585488	-0.516402	-0.429305	-0.403434	-0.44569	-0.523857	-0.554949	-0.531737	-0.485731	-0.398885	-0.347671	-0.328776	-0.299686	-0.249773	-0.213339	-0.151865	-0.0476167	0.0652931	0.0978928	0.0146811	-0.133783	-0.206452	-0.17579	-0.0297148	0.122275	0.148354
0.876845	0.497917	0.0323136	-0.371435	-0.670811	-0.832064	-0.860298	-0.779953	-0.703362	-0.686255	-0.659591	-0.595466	-0.514623	-0.49061	-0.529832	-0.602386	-0.631246	-0.6097	-0.566998	-0.486388	-0.438851	-0.421313	-0.394312	-0.347983	-0.314166	-0.257106	-0.160343	-0.0555413	-0.0252825	-0.102519	-0.240322	-0.307773	-0.279312	-0.143727	-0.00265159	0.0215555	-0.064815	-0.258479	-0.484482	-0.68392	-0.856479	-0.945104	-0.938752	-0.900696	-0.838075	-0.838855	-0.866956	-0.905111	-0.941072	-0.908474
0.377275	0.506762	0.641047	0.730458	0.738843	0.696737	0.601167	0.47471	0.35229	0.341773	0.384766	0.466212	0.504571	0.49312	0.438862	0.348167	0.313171	0.343309	0.383703	0.43857	0.477392	0.452017	0.346719	0.15826	-0.0176808	-0.155351	-0.221886	-0.233526	-0.15024	-0.0658672	0.0489738	0.126545	0.187974	0.161897	0.0575428	-0.171161	-0.429696	-0.672607	-0.812278	-0.818994	-0.711722	-0.614412	-0.483602	-0.393149	-0.312338	-0.215647	-0.112285	-0.0156172	0.0575435	0.0719734
0.327537	0.41589	0.418285	0.326786	0.148144	-0.0243119	-0.164305	-0.231963	-0.243799	-0.159108	-0.0733115	0.0434674	0.122348	0.184813	0.158296	0.0521809	-0.180382	-0.44328	-0.69029	-0.832318	-0.839147	-0.730065	-0.631112	-0.498096	-0.406116	-0.323941	-0.225619	-0.120513	-0.0222136	0.0521817	0.0668551	-0.00160032	-0.104233	-0.174003	-0.193702	-0.17077	-0.0464753	0.064187	0.130566	0.0857633	-0.0666583	-0.17549	-0.182119	-0.055951	0.110434	0.253492	0.285458	0.184677	0.0110589	-0.136901
0.115166	0.2791	0.39756	0.484691	0.447799	0.388036	0.349223	0.337722	0.29924	0.25078	0.223081	0.194615	0.216035	0.258767	0.304427	0.379949	0.429374	0.510301	0.57496	0.585947	0.60079	0.688782	0.774884	0.767661	0.643118	0.478596	0.369978	0.396224	0.499223	0.617793	0.670888	0.631935	0.618596	0.665193	0.732955	0.729457	0.579353	0.327057	0.150345	0.0886838	0.148758	0.332073	0.539692	0.710357	0.844388	0.965618	1.10314	1.21119	1.26781	1.30997
0.34346	0.367444	0.472091	0.566962	0.561407	0.437029	0.272633	0.164099	0.190325	0.293244	0.411723	0.464777	0.425854	0.412525	0.459087	0.526797	0.523301	0.373313	0.121211	-0.0553652	-0.116979	-0.0569513	0.126223	0.333682	0.504216	0.638143	0.75928	0.8967	1.00466	1.06124	1.10336	1.15673	1.20409	1.24988	1.26754	1.27076	1.3239	1.43024	1.52184	1.56252	1.47373	1.20942	0.889372	0.664181	0.58734	0.630895	0.690458	0.65426	0.53937	0.458053
0.896225	0.875746	0.88365	0.923714	0.971177	1.01788	1.03566	1.0389	1.09238	1.1994	1.2916	1.33253	1.24317	0.977161	0.655041	0.428397	0.351059	0.394895	0.454843	0.418411	0.302779	0.220937	0.265908	0.388416	0.462377	0.397257	0.215869	0.0269784	-0.0921046	-0.0243545	0.17146	0.425405	0.613299	0.700102	0.694739	0.729429	0.820701	0.947673	1.05023	0.972325	0.710312	0.312686	-0.063111	-0.270744	-0.279564	-0.130938	0.0511036	0.135402	0.113906	0.00366695
-0.730562	-0.50784	-0.252045	-0.0313155	0.0829075	0.0366936	-0.134435	-0.31264	-0.424987	-0.361069	-0.176332	0.063249	0.240514	0.322408	0.317348	0.350075	0.436185	0.555975	0.652735	0.579232	0.33204	-0.0430937	-0.397634	-0.593521	-0.601842	-0.461624	-0.28988	-0.21035	-0.23063	-0.334633	-0.470432	-0.620948	-0.748871	-0.897824	-0.996615	-1.00058	-0.858597	-0.64714	-0.499072	-0.488264	-0.597731	-0.795571	-0.947744	-1.00081	-1.02368	-1.05695	-1.12617	-1.20908	-1.21001	-1.07645
-1.12585	-0.878851	-0.619045	-0.415574	-0.334136	-0.35604	-0.465011	-0.607296	-0.765002	-0.899034	-1.0551	-1.15861	-1.16276	-1.014	-0.792445	-0.637304	-0.62598	-0.740676	-0.947965	-1.10741	-1.16301	-1.18697	-1.22183	-1.29435	-1.38123	-1.3822	-1.24226	-0.991801	-0.708392	-0.548923	-0.55832	-0.710164	-0.896438	-1.05032	-1.08696	-1.05331	-0.978895	-0.99331	-1.04339	-1.05681	-0.991815	-0.80515	-0.525785	-0.324462	-0.249672	-0.297874	-0.480352	-0.672165	-0.767101	-0.72653
-0.502623	-0.594142	-0.670062	-0.759155	-0.782118	-0.674263	-0.399452	-0.042325	0.243854	0.401989	0.407255	0.294004	0.133434	-0.0473085	-0.177195	-0.192594	-0.0789843	0.0955074	0.278512	0.302499	0.163167	-0.0624407	-0.246829	-0.305897	-0.260448	-0.200708	-0.173187	-0.211889	-0.269729	-0.290591	-0.326495	-0.373114	-0.395745	-0.345919	-0.312967	-0.226238	-0.0801448	0.123741	0.30203	0.508804	0.645525	0.720729	0.715413	0.649237	0.551869	0.464688	0.393482	0.377373	0.423828	0.539627
-0.608836	-0.442939	-0.276234	-0.172866	-0.154135	-0.170721	-0.196442	-0.189657	-0.0350767	0.182546	0.365272	0.486444	0.521159	0.479311	0.386014	0.299889	0.24004	0.28709	0.409765	0.592189	0.754035	0.844181	0.861356	0.804361	0.761874	0.73288	0.773714	0.783658	0.722394	0.650987	0.580563	0.615868	0.707089	0.723835	0.63693	0.476068	0.32101	0.315064	0.433283	0.569833	0.711415	0.753263	0.738359	0.700347	0.664668	0.654962	0.655582	0.588377	0.494511	0.366205
-0.228666	-0.121913	-0.13435	-0.304431	-0.517085	-0.681231	-0.672895	-0.577857	-0.481352	-0.448606	-0.499138	-0.551482	-0.623517	-0.664374	-0.724029	-0.808711	-0.882413	-0.943188	-0.96182	-0.973023	-1.00288	-1.05738	-1.06391	-1.04322	-1.02243	-1.02156	-1.01421	-1.0042	-0.94065	-0.916865	-0.953405	-1.03907	-1.13478	-1.16318	-1.08797	-0.94787	-0.838805	-0.814466	-0.891617	-0.978769	-0.957957	-0.806192	-0.573606	-0.369287	-0.282093	-0.250845	-0.283093	-0.3822	-0.560101	-0.741796
0.199977	0.232536	0.217246	0.136404	-0.032363	-0.214648	-0.343711	-0.355614	-0.255587	-0.155278	-0.107727	-0.166731	-0.288665	-0.418658	-0.440034	-0.372759	-0.209654	-0.0543294	-0.0190235	-0.15271	-0.430922	-0.67425	-0.788485	-0.720529	-0.528708	-0.353028	-0.270897	-0.322239	-0.364768	-0.406411	-0.401559	-0.329151	-0.247769	-0.131822	0.00411859	0.120164	0.183791	0.231952	0.285844	0.372692	0.413852	0.346963	0.261379	0.113241	-0.0525421	-0.204659	-0.300746	-0.31566	-0.20363	-0.00146409
0.165204	-0.0659016	-0.242204	-0.345475	-0.343223	-0.23451	-0.133655	-0.0858439	-0.14517	-0.267769	-0.39847	-0.419962	-0.352321	-0.188327	-0.0321555	0.00334279	-0.131072	-0.410801	-0.655455	-0.770314	-0.701987	-0.50912	-0.332482	-0.249904	-0.301525	-0.344286	-0.386157	-0.381278	-0.308476	-0.22665	-0.110071	0.0266111	0.143289	0.207263	0.255686	0.309872	0.397194	0.438578	0.371325	0.285274	0.136328	-0.0303585	-0.183304	-0.279916	-0.294911	-0.18227	0.020998	0.289291	0.442263	0.44943
-0.0866856	0.0552752	0.220098	0.39242	0.529165	0.607082	0.662975	0.72552	0.826311	0.87408	0.796452	0.697127	0.525204	0.332803	0.156263	0.0447474	0.0274391	0.157457	0.392082	0.701764	0.878333	0.886606	0.784028	0.622636	0.430438	0.260255	0.163326	0.109481	0.132883	0.243344	0.441457	0.657257	0.914502	1.11227	1.28801	1.42663	1.50075	1.4889	1.40252	1.26781	1.13481	1.00298	0.861397	0.795018	0.666144	0.461354	0.278343	0.141142	0.125652	0.158335
0.0806914	0.0512174	-0.0282614	-0.166704	-0.338623	-0.49408	-0.597946	-0.669952	-0.70571	-0.694358	-0.690136	-0.724917	-0.788158	-0.848843	-0.832779	-0.701311	-0.484761	-0.237732	0.0332834	0.210899	0.304848	0.274725	0.17864	0.00543118	-0.281979	-0.581865	-0.753555	-0.751375	-0.627231	-0.424147	-0.257929	-0.191983	-0.219314	-0.336182	-0.437966	-0.551536	-0.559509	-0.455706	-0.22148	0.0589801	0.291612	0.455989	0.493037	0.364473	0.193294	0.0566147	-0.0141819	-0.00164067	0.0148366	0.0671238
0.743259	0.658649	0.582559	0.45914	0.321881	0.123401	-0.186387	-0.509621	-0.694679	-0.692328	-0.558519	-0.339623	-0.160464	-0.0893836	-0.118842	-0.244809	-0.354519	-0.476931	-0.485524	-0.37364	-0.121177	0.181119	0.431864	0.609039	0.648971	0.510397	0.325891	0.17857	0.102261	0.115779	0.133539	0.189897	0.320796	0.441961	0.540136	0.532578	0.446132	0.314399	0.165072	0.0517008	0.00238735	0.0242456	0.141505	0.280291	0.355242	0.389256	0.369731	0.327655	0.275467	0.202738
1.04824	1.00618	0.90412	0.693933	0.496401	0.342749	0.26879	0.281892	0.299105	0.353727	0.480595	0.598029	0.69318	0.685855	0.602071	0.474395	0.329667	0.219787	0.171992	0.193177	0.306826	0.441338	0.51398	0.546946	0.528023	0.487242	0.436662	0.366173	0.324439	0.360033	0.398017	0.448242	0.370517	0.173959	-0.0801017	-0.300099	-0.4277	-0.397671	-0.29513	-0.155609	-0.0460357	0.0307133	0.0812277	0.100256	0.123304	0.132095	0.14079	0.0859032	-0.015729	-0.172466
0.530287	0.442538	0.360263	0.27499	0.224789	0.253766	0.291166	0.340619	0.264089	0.0705557	-0.179596	-0.396209	-0.521846	-0.492279	-0.391316	-0.253942	-0.146054	-0.0704861	-0.020749	-0.00201302	0.0206801	0.0293353	0.0378974	-0.0161454	-0.116214	-0.270539	-0.407033	-0.481781	-0.510133	-0.436721	-0.312192	-0.19499	-0.142943	-0.127117	-0.104245	-0.0379466	0.0168627	0.0847854	0.151951	0.152901	0.162607	0.103193	0.0368815	0.0106642	0.0102078	0.06152	0.134125	0.251598	0.432196	0.636055
0.114469	0.0351817	-0.0237245	-0.0408972	-0.0508148	-0.0511727	-0.105421	-0.20587	-0.360781	-0.497794	-0.572826	-0.601285	-0.527594	-0.402593	-0.284945	-0.2327	-0.216814	-0.193855	-0.127305	-0.0722873	-0.00410651	0.0633147	0.0642677	0.0740108	0.0143715	-0.0521925	-0.0785093	-0.0789675	-0.0274603	0.0454206	0.16334	0.344624	0.549258	0.697478	0.745697	0.677608	0.493544	0.280214	0.0832164	-0.0967513	-0.212268	-0.267577	-0.288084	-0.33513	-0.410131	-0.469472	-0.397997	-0.290696	-0.165934	-0.0527121
0.785039	0.542496	0.289077	0.0393199	-0.123697	-0.142741	0.0133308	0.333449	0.616809	0.754457	0.603096	0.227321	-0.153532	-0.308882	-0.130108	0.256839	0.663917	0.914668	0.945634	0.804393	0.701293	0.617093	0.550475	0.482898	0.412281	0.373818	0.341131	0.274767	0.171228	-0.019948	-0.213628	-0.307441	-0.275764	-0.232527	-0.221675	-0.256395	-0.253823	-0.22144	-0.145886	-0.1176	-0.101058	-0.0759349	-0.0393952	0.0574339	0.123112	0.0727197	-0.0857094	-0.350172	-0.592943	-0.76838
0.109286	0.051867	-0.049647	-0.22565	-0.388718	-0.472747	-0.445409	-0.408095	-0.398729	-0.428693	-0.426474	-0.398526	-0.333321	-0.308909	-0.294633	-0.272951	-0.241417	-0.15785	-0.101169	-0.144658	-0.281387	-0.509625	-0.719144	-0.87055	-0.986316	-1.03136	-0.964131	-0.782723	-0.619054	-0.525685	-0.528033	-0.580305	-0.577034	-0.448372	-0.256447	-0.0622694	0.0457338	0.129487	0.191142	0.197301	0.101365	-0.117282	-0.359737	-0.565756	-0.68696	-0.738364	-0.726468	-0.624588	-0.42034	-0.183116
-0.208965	-0.228176	-0.275536	-0.350496	-0.437647	-0.441789	-0.31569	-0.127588	0.0627207	0.168572	0.250657	0.311084	0.31712	0.223095	0.0088044	-0.228821	-0.430736	-0.549525	-0.599905	-0.588246	-0.488396	-0.288217	-0.0557188	0.196626	0.411384	0.491196	0.437401	0.278579	0.00786868	-0.329492	-0.662826	-0.931949	-1.06856	-1.03591	-0.887994	-0.592188	-0.288504	-0.0227322	0.138371	0.205556	0.230583	0.192714	0.106281	-0.0220735	-0.0820921	-0.00065885	0.157677	0.329808	0.441972	0.462249
0.454732	0.563678	0.663129	0.673371	0.583748	0.409164	0.124496	-0.23026	-0.580782	-0.863781	-1.00743	-0.973099	-0.81756	-0.506501	-0.187158	0.0923172	0.261727	0.332377	0.358694	0.318873	0.227983	0.0930098	0.0298966	0.115529	0.282029	0.463036	0.580983	0.602306	0.511526	0.418315	0.311026	0.300786	0.424174	0.651926	0.866034	1.03771	1.06358	0.987511	0.826141	0.649849	0.495423	0.261639	0.0153586	-0.186342	-0.280472	-0.255207	-0.148353	-0.0303366	0.0620546	0.00402193
0.0749296	0.10517	0.089056	0.0227745	-0.0594264	-0.17906	-0.277971	-0.326201	-0.330713	-0.268356	-0.134154	0.0220365	0.152711	0.190193	0.173709	0.118397	0.126693	0.177608	0.238926	0.258783	0.20079	0.0997206	0.00055508	-0.106582	-0.251123	-0.400956	-0.579881	-0.600191	-0.440144	-0.147219	0.120322	0.267196	0.336219	0.303428	0.27197	0.260155	0.252549	0.164858	0.0246399	-0.130485	-0.267362	-0.373181	-0.386092	-0.389108	-0.391812	-0.348384	-0.231177	-0.127662	-0.0776363	-0.0990418
0.0224495	-0.0246092	0.0274739	0.109455	0.184171	0.208449	0.143342	0.0298757	-0.0814538	-0.201733	-0.364004	-0.532216	-0.733089	-0.755889	-0.576211	-0.247354	0.0530036	0.217894	0.295384	0.25857	0.223253	0.209989	0.20145	0.103003	-0.0544147	-0.228568	-0.382234	-0.501033	-0.515528	-0.518914	-0.52195	-0.473195	-0.341611	-0.225398	-0.169236	-0.193268	-0.293215	-0.393175	-0.40591	-0.246636	0.070151	0.437375	0.794985	1.03755	1.10266	1.03571	0.856849	0.569586	0.265631	0.0613969
-0.0479768	-0.183132	-0.304636	-0.378302	-0.427468	-0.45531	-0.525552	-0.687351	-0.913162	-1.07139	-1.13328	-1.07361	-0.957177	-0.845889	-0.748614	-0.599722	-0.457155	-0.287405	-0.125125	0.0525509	0.166282	0.237958	0.247551	0.154276	0.0244129	-0.0782411	-0.0543995	-0.0227939	0.0241609	-0.018061	-0.146572	-0.321936	-0.463063	-0.530999	-0.548319	-0.472166	-0.332592	-0.2183	-0.19997	-0.226554	-0.337283	-0.462618	-0.56757	-0.527915	-0.348221	-0.0593178	0.220028	0.390128	0.403889	0.275007
-0.67547	-0.640893	-0.598502	-0.467292	-0.328595	-0.153809	0.0175656	0.205199	0.325304	0.400997	0.411128	0.312625	0.175484	0.067077	0.0922548	0.125632	0.175218	0.13063	-0.00508348	-0.190276	-0.339312	-0.411055	-0.429346	-0.348925	-0.201528	-0.0808311	-0.0614745	-0.0895483	-0.206483	-0.338843	-0.449676	-0.407799	-0.218034	0.0870609	0.382063	0.561696	0.576228	0.440123	0.216217	0.0127796	-0.171993	-0.25694	-0.280298	-0.241252	-0.16441	-0.0129353	0.179395	0.362676	0.469329	0.532804
0.219773	0.0837086	-0.0662206	-0.234397	-0.371588	-0.459471	-0.504705	-0.515242	-0.514604	-0.476799	-0.466443	-0.440845	-0.47355	-0.511782	-0.566643	-0.553324	-0.468312	-0.293354	-0.0894809	0.0171354	-0.0082542	-0.180763	-0.387793	-0.552264	-0.616165	-0.667548	-0.689598	-0.638838	-0.478513	-0.208516	0.097583	0.333969	0.532965	0.628221	0.604549	0.489443	0.310267	0.189945	0.173654	0.258028	0.363517	0.366115	0.272479	0.17043	0.114585	0.123668	0.20888	0.321549	0.439693	0.534903
0.319506	0.438054	0.578899	0.689374	0.72627	0.610499	0.433905	0.231582	0.0185986	-0.117179	-0.141135	-0.0169748	0.11592	0.172239	0.0671213	-0.182869	-0.487371	-0.730699	-0.86959	-0.962733	-1.1181	-1.31096	-1.52509	-1.63541	-1.62038	-1.47846	-1.33304	-1.24714	-1.20807	-1.16678	-1.10879	-1.06609	-1.0737	-1.18534	-1.37367	-1.56232	-1.69633	-1.69348	-1.55183	-1.32789	-1.10659	-0.879958	-0.699166	-0.585156	-0.567457	-0.607081	-0.644768	-0.636131	-0.540562	-0.486839
-0.175586	0.00981626	0.223547	0.451606	0.618847	0.691676	0.662992	0.548079	0.361289	0.155712	0.0233049	0.0055848	0.0319364	0.113551	0.223797	0.355305	0.469154	0.560942	0.607773	0.607292	0.59775	0.606647	0.59832	0.516881	0.403509	0.240905	0.0600622	-0.0662935	-0.14592	-0.161309	-0.138731	-0.127529	-0.102691	-0.0466385	0.00803543	0.0269105	0.0285723	0.0246022	0.034566	0.12927	0.264295	0.413236	0.499753	0.470222	0.358719	0.241475	0.10274	0.0235608	0.0154764	0.0318894
-0.270181	-0.101019	0.0258491	0.0748091	0.0887925	0.0921369	0.103417	0.210635	0.3635	0.532119	0.630068	0.596634	0.470399	0.337664	0.180598	0.0909579	0.0818054	0.100387	0.188409	0.268425	0.351852	0.311202	0.199302	0.0174721	-0.237119	-0.543917	-0.862036	-1.06376	-1.01883	-0.716273	-0.232687	0.23218	0.450832	0.438514	0.196402	-0.145588	-0.326627	-0.290626	-0.127497	0.0443033	0.123806	0.0466949	-0.114314	-0.281154	-0.385343	-0.43231	-0.417964	-0.400115	-0.378428	-0.372029
-0.00220967	-0.252993	-0.504971	-0.596036	-0.513171	-0.33312	-0.161965	-0.0827609	-0.159582	-0.319986	-0.486199	-0.589998	-0.636788	-0.622496	-0.604714	-0.583108	-0.576734	-0.657873	-0.779537	-0.970548	-1.12072	-1.13851	-1.04449	-0.862926	-0.666839	-0.480016	-0.382083	-0.347132	-0.331355	-0.309639	-0.223143	-0.127861	-0.0550403	-0.0456354	-0.0588618	-0.0705927	-0.0633788	-0.0371921	-0.0073697	0.0857054	0.176671	0.251098	0.26804	0.244398	0.234747	0.227734	0.302764	0.356771	0.365623	0.300618
-0.025809	0.034122	0.0363055	0.0179221	0.0176414	0.0277703	0.104393	0.188799	0.253307	0.261639	0.249922	0.23953	0.245921	0.269118	0.295536	0.377987	0.458569	0.5245	0.539508	0.518565	0.510016	0.503803	0.570269	0.618112	0.625953	0.568368	0.523006	0.445591	0.39662	0.37977	0.345243	0.286842	0.175029	0.0366559	-0.0693057	-0.136616	-0.133716	-0.0507386	0.0104363	0.0193272	-0.0690094	-0.215841	-0.396161	-0.472153	-0.429703	-0.283032	-0.0767945	0.0671035	0.138157	0.126964
-0.310181	-0.14554	0.0171161	0.109466	0.120153	0.0412442	-0.137198	-0.352597	-0.528148	-0.656711	-0.581541	-0.475303	-0.29941	-0.143006	0.011768	0.170398	0.264062	0.27657	0.246078	0.233531	0.21033	0.148157	0.102929	0.102221	0.240184	0.525647	0.900073	1.17616	1.25239	1.10246	0.818754	0.502178	0.27263	0.146901	0.0368561	-0.0165533	-0.0011291	0.0740494	0.223928	0.438072	0.656409	0.772045	0.7379	0.576056	0.352836	0.16619	0.0345967	-0.0879382	-0.171974	-0.190181
1.22114	1.15234	1.09792	1.03721	0.968033	0.874008	0.772244	0.649369	0.506852	0.405442	0.373719	0.435933	0.48098	0.484799	0.434569	0.385627	0.342596	0.353491	0.40782	0.482354	0.500684	0.447318	0.298499	0.148073	0.0364686	-0.0358266	-0.0807773	-0.0820217	-0.0833598	-0.136197	-0.220752	-0.32987	-0.394785	-0.38708	-0.309514	-0.192301	-0.087857	-0.0628324	-0.0935251	-0.158455	-0.209032	-0.207606	-0.179178	-0.0908978	0.0372636	0.247761	0.457276	0.583849	0.589226	0.478161
-0.473509	-0.295261	0.00562837	0.29588	0.534736	0.681771	0.804665	0.871077	0.911459	0.933789	0.961324	0.987409	1.02965	1.09235	1.10876	1.14005	1.16629	1.19272	1.11671	0.983209	0.84116	0.806543	0.845236	0.901867	0.834802	0.661269	0.44107	0.27305	0.213238	0.347675	0.585312	0.833425	0.988182	1.03352	0.954295	0.834879	0.765093	0.733578	0.756133	0.789963	0.745084	0.590583	0.352353	0.113289	0.0222013	0.0386004	0.128716	0.192902	0.250431	0.389046
0.0592037	0.00863472	-0.0155275	0.00561901	0.0558976	0.0946708	0.0464549	-0.0504995	-0.0889993	-0.0406251	0.0386548	0.078162	0.098785	0.132346	0.169114	0.190656	0.163743	0.0635471	-0.0225652	-0.0957452	-0.079126	0.0387399	0.255322	0.378606	0.396033	0.257366	0.0379747	-0.256552	-0.589784	-0.871975	-1.1106	-1.22136	-1.20438	-1.01926	-0.68318	-0.264838	0.10351	0.371309	0.45806	0.258282	-0.14332	-0.681668	-1.19547	-1.50368	-1.53618	-1.22175	-0.768889	-0.475493	-0.454481	-0.639883
0.0419542	0.0205063	-0.0330419	-0.162304	-0.354721	-0.55974	-0.731883	-0.80952	-0.800268	-0.719291	-0.656003	-0.635038	-0.657251	-0.693747	-0.734757	-0.773589	-0.768803	-0.646248	-0.48379	-0.376577	-0.344645	-0.378062	-0.418471	-0.40895	-0.341873	-0.214889	-0.0737173	0.0355653	0.0703079	0.034061	-0.0278841	-0.0970556	-0.0884701	-0.00972145	0.0463687	0.0623498	0.0510976	0.0526306	0.0179081	0.0352487	0.0431743	0.122562	0.222354	0.331151	0.357507	0.271391	0.0882195	-0.195983	-0.452882	-0.707514
0.363363	0.303631	0.253366	0.283161	0.375276	0.435244	0.451783	0.440138	0.441725	0.40579	0.423736	0.431938	0.514098	0.617374	0.729968	0.757245	0.668123	0.478556	0.184432	-0.081436	-0.344957	-0.466963	-0.49066	-0.441492	-0.340734	-0.271324	-0.235245	-0.251021	-0.279882	-0.341237	-0.377764	-0.351747	-0.262646	-0.120062	0.0227823	0.135909	0.270251	0.419803	0.591728	0.703066	0.73103	0.644966	0.511987	0.497326	0.607335	0.843151	1.07396	1.18679	1.16712	0.987169
0.464447	0.411112	0.296795	0.0784256	-0.140476	-0.367735	-0.484906	-0.507665	-0.460445	-0.36368	-0.297021	-0.262372	-0.277522	-0.30524	-0.364163	-0.399242	-0.374256	-0.288687	-0.151754	-0.0145699	0.0940738	0.223092	0.366716	0.531829	0.638754	0.665609	0.582956	0.455247	0.441167	0.546817	0.773287	0.994947	1.10331	1.08442	0.911597	0.678583	0.512457	0.502255	0.576506	0.622501	0.588661	0.574917	0.616187	0.746027	0.89586	0.999751	1.0342	0.982783	0.898508	0.81614
0.970731	0.928232	0.848926	0.701068	0.53379	0.515238	0.636458	0.896306	1.15063	1.27496	1.25329	1.055	0.787645	0.597034	0.585329	0.670523	0.723297	0.68447	0.668699	0.716053	0.865028	1.03694	1.15615	1.19568	1.13668	1.03998	0.945474	0.848254	0.721086	0.54858	0.3722	0.164471	0.0423228	-0.00207762	-0.0228349	-0.0491559	-0.0534822	-0.0740118	-0.0636482	0.0403547	0.249619	0.52342	0.785644	0.958201	0.970846	0.864769	0.655002	0.412786	0.192227	0.019263
0.479269	0.590715	0.683249	0.739972	0.746058	0.686278	0.602924	0.521455	0.437647	0.328024	0.179318	0.0272721	-0.151797	-0.257093	-0.295368	-0.313262	-0.335951	-0.339681	-0.357378	-0.348444	-0.25879	-0.078397	0.157629	0.383676	0.532426	0.543326	0.451884	0.271057	0.0622591	-0.127871	-0.276972	-0.39449	-0.45518	-0.500238	-0.451919	-0.342306	-0.248413	-0.150389	-0.046905	0.0934619	0.214844	0.334893	0.404214	0.451922	0.426241	0.431646	0.463602	0.467444	0.395532	0.287508
0.666655	0.516464	0.347763	0.185047	0.0058647	-0.152249	-0.319743	-0.42574	-0.510238	-0.598234	-0.712237	-0.82181	-0.92035	-0.949243	-0.929921	-0.942215	-1.01605	-1.12089	-1.15538	-1.15271	-1.07836	-0.96284	-0.845221	-0.78142	-0.736564	-0.705365	-0.65456	-0.604434	-0.606492	-0.611899	-0.594909	-0.475767	-0.289779	-0.0696593	0.118	0.214003	0.241774	0.217512	0.192261	0.189699	0.125834	-0.0324682	-0.279559	-0.526217	-0.633702	-0.572762	-0.399083	-0.151571	0.0706465	0.216698
-0.669334	-0.565921	-0.475259	-0.385293	-0.315458	-0.305354	-0.310684	-0.293935	-0.176485	0.00686172	0.223856	0.408851	0.503491	0.530867	0.506949	0.482057	0.479531	0.416574	0.260519	0.0169369	-0.226219	-0.332177	-0.272103	-0.10089	0.143107	0.36217	0.506147	0.582014	0.595329	0.611402	0.638573	0.638413	0.627144	0.604709	0.536659	0.419899	0.280717	0.215761	0.18577	0.233715	0.27559	0.245066	0.144135	0.0181883	-0.100144	-0.181945	-0.18409	-0.0864222	0.0472758	0.120338
-0.394003	-0.384815	-0.409312	-0.452873	-0.455824	-0.442501	-0.36272	-0.249896	-0.146678	-0.0262122	0.0784263	0.128282	0.176999	0.284949	0.447573	0.63863	0.75289	0.707182	0.502645	0.27352	0.149761	0.202871	0.339373	0.436441	0.404199	0.307024	0.267487	0.342253	0.430321	0.536168	0.581564	0.603819	0.603093	0.662289	0.751405	0.873148	0.962347	0.94946	0.853996	0.704388	0.495842	0.283828	0.0789176	-0.0474658	-0.148291	-0.171533	-0.0676556	0.144114	0.373252	0.461539
0.859052	0.801279	0.693529	0.560528	0.358258	0.152249	-0.0578209	-0.187386	-0.290749	-0.314577	-0.208084	0.00901707	0.243924	0.334433	0.401376	0.390097	0.366128	0.39167	0.481478	0.628886	0.73772	0.771653	0.604402	0.352557	-0.108269	-0.546763	-0.896066	-1.11975	-1.20767	-1.15021	-0.964735	-0.758573	-0.551338	-0.370281	-0.304898	-0.30129	-0.326397	-0.425145	-0.568551	-0.674149	-0.682573	-0.549765	-0.321015	-0.140714	-0.0340092	-0.0414578	-0.0565268	-0.0744846	-0.0994296	-0.168689
-1.40941	-1.32581	-1.25363	-1.13575	-0.959393	-0.779962	-0.604602	-0.451393	-0.396066	-0.393013	-0.414259	-0.497819	-0.619167	-0.708523	-0.715652	-0.603271	-0.409705	-0.257136	-0.166843	-0.173146	-0.185897	-0.201093	-0.222201	-0.280808	-0.371822	-0.409166	-0.395336	-0.319673	-0.301486	-0.419593	-0.72358	-1.09742	-1.47486	-1.75421	-1.83745	-1.68136	-1.39913	-1.07808	-0.800596	-0.648405	-0.515208	-0.362859	-0.205651	-0.0855112	-0.0563892	-0.0662737	-0.0288079	0.0584137	0.141594	0.18673
-0.59746	-0.497043	-0.497605	-0.561913	-0.616909	-0.614283	-0.513097	-0.338813	-0.201443	-0.120145	-0.12582	-0.137301	-0.150983	-0.169988	-0.222757	-0.304705	-0.338328	-0.325876	-0.25775	-0.241375	-0.347717	-0.621421	-0.958018	-1.29786	-1.54939	-1.62433	-1.48379	-1.22967	-0.94061	-0.690766	-0.553735	-0.433806	-0.296634	-0.155087	-0.0469151	-0.020694	-0.0295939	0.00413969	0.0826725	0.157567	0.198206	0.213729	0.252221	0.322776	0.340673	0.331486	0.27247	0.155785	0.0764513	0.0445492
0.37808	0.43563	0.511733	0.598999	0.628307	0.623767	0.570667	0.465679	0.394297	0.365592	0.368674	0.349934	0.300912	0.190195	0.0583824	-0.0957423	-0.226907	-0.330456	-0.411037	-0.402861	-0.334986	-0.246669	-0.173666	-0.0857	-0.0133088	0.0540681	0.0505283	0.00304256	-0.0641589	-0.11988	-0.150443	-0.10312	-0.0297659	0.0593269	0.128405	0.147242	0.12993	0.10053	0.119043	0.134958	0.152898	0.13926	0.132167	0.151845	0.171252	0.198559	0.272233	0.396741	0.547645	0.692239
0.189453	0.170838	0.16651	0.21731	0.358376	0.476795	0.495877	0.399867	0.242776	0.131379	0.1305	0.23128	0.394587	0.53061	0.562215	0.488405	0.268127	-0.0302734	-0.320615	-0.445541	-0.357323	-0.119805	0.0538183	0.117587	0.121932	0.121585	0.211941	0.341335	0.454348	0.548685	0.625492	0.715517	0.860225	0.922796	0.972099	0.933364	0.842909	0.674162	0.472378	0.205627	0.029914	-0.0480986	-0.0447866	-0.112052	-0.288347	-0.54714	-0.712723	-0.666854	-0.45141	-0.115943
-1.32701	-1.18715	-0.948783	-0.655258	-0.325308	-0.0526312	-0.00991107	-0.0780915	-0.246133	-0.384278	-0.484177	-0.599683	-0.744172	-0.911891	-1.01154	-0.968552	-0.835872	-0.733921	-0.728617	-0.815717	-0.933948	-0.971667	-0.902321	-0.775816	-0.685291	-0.644331	-0.736118	-0.856595	-1.01692	-1.09014	-1.05926	-0.921761	-0.712827	-0.52551	-0.37404	-0.312869	-0.39916	-0.574126	-0.795369	-0.913233	-0.833332	-0.659608	-0.503914	-0.434773	-0.382082	-0.294185	-0.0839656	0.124292	0.281809	0.304338
-0.500389	-0.605913	-0.725209	-0.761382	-0.723456	-0.598147	-0.415018	-0.250836	-0.118073	-0.0644568	-0.140091	-0.293447	-0.487365	-0.590672	-0.52064	-0.368371	-0.231907	-0.171305	-0.125121	-0.0480801	0.136176	0.318712	0.456774	0.476521	0.394574	0.288342	0.233246	0.236932	0.236532	0.17228	0.0308046	-0.156915	-0.353798	-0.496116	-0.537815	-0.481965	-0.431007	-0.369853	-0.364886	-0.379518	-0.451269	-0.533997	-0.528272	-0.406417	-0.189348	0.030065	0.130206	0.0897131	-0.00952916	-0.170274
-0.224063	-0.319164	-0.371281	-0.35958	-0.283396	-0.226015	-0.16557	-0.160661	-0.175123	-0.246042	-0.32781	-0.322151	-0.20171	0.0128415	0.22971	0.328689	0.288666	0.190575	0.0316939	-0.109619	-0.225642	-0.334162	-0.326937	-0.295256	-0.209964	-0.0881557	-0.00528883	-0.0128892	-0.0845492	-0.128577	-0.129247	-0.0492201	0.0761114	0.210006	0.309683	0.360284	0.401265	0.467915	0.474924	0.422539	0.304258	0.15547	0.0345113	-0.0353107	-0.0548237	-0.0139797	0.0475845	0.138294	0.266934	0.430939
-0.143797	-0.111919	-0.12247	-0.138858	-0.206193	-0.284629	-0.278866	-0.156222	0.0622541	0.283089	0.383879	0.343124	0.243239	0.0814513	-0.0624468	-0.180592	-0.291097	-0.283739	-0.251479	-0.164627	-0.0405905	0.0437921	0.0360527	-0.036918	-0.0817512	-0.0824333	-0.000942764	0.126681	0.263025	0.364526	0.416052	0.457782	0.525652	0.532789	0.479445	0.359001	0.207492	0.0843203	0.0132211	-0.00664885	0.0349423	0.0976326	0.190001	0.320995	0.487999	0.6007	0.630601	0.604297	0.522129	0.448541
0.105439	0.194532	0.236515	0.211148	0.198306	0.196764	0.187373	0.123659	0.0791568	0.0353231	0.0542115	0.0437989	-0.0521614	-0.265678	-0.549663	-0.738819	-0.702844	-0.460416	-0.15495	0.0707048	0.243809	0.363026	0.517476	0.693089	0.865748	1.0442	1.1964	1.22088	1.11088	0.843072	0.499128	0.14551	-0.14239	-0.273923	-0.268978	-0.158996	0.016817	0.140487	0.20246	0.193807	0.128616	0.0267087	0.049935	0.198066	0.415128	0.634015	0.708622	0.567323	0.276227	-0.05979
0.0540587	0.166041	0.263376	0.416107	0.589348	0.754218	0.92195	1.065	1.08802	0.984622	0.732904	0.409624	0.0772515	-0.193352	-0.316982	-0.312334	-0.20896	-0.0437099	0.0725297	0.130779	0.122647	0.0613719	-0.0344125	-0.0125816	0.126649	0.330671	0.536407	0.606532	0.473722	0.200114	-0.115714	-0.377966	-0.527983	-0.58116	-0.513738	-0.314424	-0.0610283	0.163212	0.313945	0.316011	0.198963	0.0528363	-0.103069	-0.19446	-0.222014	-0.187555	-0.091855	0.0494639	0.15011	0.243483
-0.201953	-0.154394	-0.060084	-0.00677711	0.022669	-0.000270597	-0.0631063	-0.161331	-0.138944	0.00383419	0.213053	0.42403	0.495942	0.359749	0.0791707	-0.244704	-0.513637	-0.667476	-0.722007	-0.652868	-0.448476	-0.188625	0.0413284	0.195901	0.19802	0.0779905	-0.0718594	-0.231737	-0.325456	-0.353712	-0.318375	-0.220237	-0.0753177	0.027893	0.123644	0.122328	0.0531631	-0.104282	-0.273354	-0.398188	-0.350871	-0.208791	-0.0801833	-0.0823565	-0.130017	-0.158996	-0.132564	-0.0743674	-0.0481113	-0.0563057
1.15014	1.0541	0.906627	0.766039	0.621173	0.529165	0.521357	0.592486	0.727372	0.82439	0.879595	0.919523	0.908447	0.882624	0.802061	0.711543	0.536249	0.33892	0.231768	0.241786	0.401719	0.644422	0.824868	0.917607	0.930545	0.922709	0.900916	0.824933	0.672002	0.516826	0.426425	0.474985	0.669531	0.873611	1.00164	0.983105	0.784492	0.554753	0.282081	0.00561865	-0.17452	-0.310902	-0.399734	-0.433864	-0.451453	-0.470451	-0.398399	-0.297094	-0.153627	-0.0211651
-0.293004	-0.134801	-0.010386	0.0779646	0.0578597	-0.0507975	-0.26898	-0.501817	-0.782739	-1.00751	-1.13907	-1.11614	-0.959508	-0.781912	-0.723375	-0.771601	-0.889853	-0.854706	-0.667896	-0.38486	-0.0982482	0.0533626	0.0704461	-0.042107	-0.199303	-0.329705	-0.399525	-0.427425	-0.392694	-0.397715	-0.465253	-0.519078	-0.490086	-0.380887	-0.203195	-0.0107608	0.0862857	0.0724005	-0.0493524	-0.242948	-0.461674	-0.648219	-0.732669	-0.744648	-0.725447	-0.731819	-0.711434	-0.693614	-0.615184	-0.54035
-0.365943	-0.241623	-0.242894	-0.37454	-0.590727	-0.757842	-0.740505	-0.511155	-0.199473	0.0859902	0.282738	0.491274	0.685433	0.834618	0.884505	0.753111	0.487552	0.102229	-0.178695	-0.352298	-0.380128	-0.393011	-0.353784	-0.318245	-0.201992	0.0206501	0.25874	0.456135	0.521823	0.478744	0.440125	0.392137	0.323903	0.233318	0.120036	0.0491828	0.0841825	0.236776	0.449616	0.584394	0.585353	0.4684	0.274412	0.099286	0.00908467	0.0243153	0.0469554	0.0261443	-0.0189119	-0.100893
-0.448613	-0.451952	-0.40173	-0.320864	-0.221487	-0.185843	-0.218106	-0.379954	-0.555701	-0.678352	-0.679518	-0.539833	-0.282332	0.00903745	0.206574	0.193493	0.0160344	-0.166437	-0.220983	-0.09336	0.103622	0.263721	0.285227	0.196424	0.0770896	0.0155254	0.03001	0.10398	0.222748	0.364559	0.485693	0.53485	0.497454	0.46693	0.472538	0.529207	0.571206	0.539639	0.449521	0.317723	0.171297	0.131278	0.166371	0.344347	0.606083	0.863957	1.05609	1.10992	1.07401	0.993647
0.505901	0.676153	0.790824	0.829555	0.77554	0.737269	0.743815	0.809966	0.858992	0.822144	0.716947	0.563096	0.392171	0.345456	0.386421	0.594176	0.899704	1.20073	1.42501	1.48784	1.44592	1.35212	1.16745	0.927599	0.677469	0.380068	0.136365	-0.0408763	-0.0506615	0.112449	0.394794	0.644549	0.785071	0.794611	0.741045	0.720941	0.677914	0.632016	0.521898	0.400328	0.275898	0.12193	-0.0652484	-0.242693	-0.371354	-0.38846	-0.306126	-0.229171	-0.234104	-0.332253
-0.565813	-0.605508	-0.638777	-0.690462	-0.709483	-0.657974	-0.557027	-0.480584	-0.38914	-0.353562	-0.384244	-0.460535	-0.476214	-0.362587	-0.164294	0.0522559	0.198689	0.265596	0.276546	0.241489	0.216301	0.232211	0.27019	0.385949	0.550625	0.741052	0.904287	1.0093	1.01681	0.931315	0.742114	0.586184	0.561018	0.641568	0.781967	0.955126	1.0964	1.14512	1.01922	0.724858	0.371587	0.0779877	0.027014	0.130483	0.27397	0.395845	0.435602	0.369466	0.231262	0.11578
0.188325	0.146172	0.112141	0.10051	0.153959	0.228422	0.301453	0.376622	0.465415	0.57422	0.668274	0.765316	0.775738	0.730329	0.64148	0.614915	0.638398	0.619544	0.540664	0.317915	0.0163477	-0.281963	-0.482498	-0.583695	-0.613536	-0.553571	-0.393833	-0.126881	0.168758	0.368133	0.390438	0.186073	-0.200652	-0.636488	-0.881831	-0.85759	-0.553546	-0.142091	0.251109	0.46192	0.471745	0.321842	0.119337	0.0193374	-0.0590498	-0.0386166	-0.0299946	0.026299	0.108083	0.266859
0.0226899	-0.0168208	-0.0131231	0.0918826	0.257085	0.361847	0.415988	0.459569	0.417829	0.357992	0.286008	0.20409	0.0818416	-0.0155753	-0.0172201	0.0580455	0.121827	0.0469733	-0.0988475	-0.26552	-0.372173	-0.392285	-0.393266	-0.375409	-0.399806	-0.384448	-0.303095	-0.171192	-0.106803	-0.0953217	-0.147681	-0.220487	-0.272341	-0.283627	-0.246037	-0.221418	-0.233922	-0.31545	-0.397253	-0.520881	-0.637599	-0.57953	-0.39408	-0.0698058	0.222011	0.375761	0.389465	0.320806	0.228766	0.119889
0.0627716	0.019563	-0.0329326	-0.0943717	-0.193944	-0.282286	-0.397547	-0.506367	-0.452227	-0.279328	0.0230015	0.29507	0.438415	0.451191	0.387179	0.301368	0.199859	0.107866	-0.0359082	-0.169237	-0.264693	-0.290705	-0.199901	-0.0597079	0.0912599	0.225739	0.324099	0.363532	0.279696	0.0577705	-0.241482	-0.516386	-0.620983	-0.473815	-0.184562	0.175186	0.461501	0.598763	0.605814	0.534079	0.454055	0.379567	0.38533	0.519733	0.74772	0.995393	1.19992	1.27827	1.25742	1.19241
-0.755328	-0.915342	-1.01881	-1.01321	-0.896102	-0.743479	-0.607196	-0.595061	-0.683703	-0.796125	-0.880616	-0.897607	-0.872269	-0.790359	-0.628249	-0.410153	-0.13746	0.150894	0.370162	0.406173	0.299121	0.077717	-0.127665	-0.243978	-0.252317	-0.212668	-0.204437	-0.219244	-0.283691	-0.288559	-0.275845	-0.203903	-0.151922	-0.128823	-0.0574591	0.092255	0.269943	0.364253	0.324901	0.202343	0.0902954	0.0551639	0.196071	0.481749	0.809742	1.02145	1.01496	0.786947	0.405331	0.00104454
-0.826684	-0.668348	-0.460133	-0.250171	-0.0883797	-0.00690218	0.0693387	0.139355	0.296709	0.469573	0.583884	0.528073	0.282361	-0.1536	-0.563742	-0.876187	-0.875412	-0.60404	-0.193787	0.200726	0.388991	0.427835	0.384147	0.31205	0.223822	0.163221	0.119794	0.150347	0.213755	0.287447	0.275557	0.163694	-0.0562284	-0.271051	-0.410661	-0.389247	-0.156405	0.22014	0.587582	0.798371	0.817564	0.709171	0.530496	0.348183	0.246793	0.207543	0.19941	0.259993	0.298373	0.288539
0.039285	0.0256909	0.0572448	0.109747	0.17322	0.155601	0.0564845	-0.138378	-0.328722	-0.452424	-0.433449	-0.22714	0.106498	0.432071	0.618841	0.635846	0.539804	0.38149	0.219951	0.130115	0.0953366	0.0881301	0.14181	0.175817	0.167103	0.168816	0.132566	0.095641	0.0567972	-9.88691e-05	-0.0493422	-0.0570014	-0.059073	-0.0651801	-0.147022	-0.293233	-0.486691	-0.650488	-0.808586	-0.876093	-0.88591	-0.86518	-0.868	-0.900434	-0.885776	-0.758099	-0.524411	-0.182868	0.129249	0.356556
0.234651	0.30435	0.340367	0.343821	0.300483	0.205112	0.102337	0.037459	0.102056	0.319677	0.582552	0.894524	1.07416	1.14046	1.10748	0.966169	0.849344	0.795052	0.763562	0.727268	0.647834	0.502717	0.36957	0.262519	0.268926	0.402734	0.576884	0.707691	0.771757	0.707999	0.598426	0.462094	0.347531	0.231311	0.144531	0.140192	0.209212	0.303114	0.324068	0.296965	0.242294	0.220109	0.298471	0.489645	0.715695	0.862305	0.989324	1.05919	1.16208	1.2167
-0.281983	-0.181301	-0.0712576	0.026971	0.0485097	0.0165199	-0.0362924	-0.0577229	0.0179751	0.20265	0.421015	0.562641	0.685342	0.752829	0.852224	0.904986	0.876094	0.756874	0.550022	0.353817	0.204872	0.154795	0.198146	0.280807	0.3411	0.305456	0.203395	0.0784092	0.00437189	-0.00140262	0.0378616	0.0353836	-0.0242006	-0.208225	-0.430622	-0.611199	-0.682427	-0.635446	-0.464128	-0.281664	-0.120995	-0.0355907	-0.0544597	-0.121924	-0.162734	-0.107479	0.0527906	0.249795	0.407777	0.465388
0.685509	0.727916	0.748025	0.709854	0.630002	0.537464	0.4746	0.50321	0.51798	0.481464	0.385024	0.385069	0.492556	0.653378	0.778398	0.740407	0.60688	0.431379	0.35577	0.411046	0.531062	0.598026	0.628393	0.610401	0.451885	0.297805	0.162077	0.125704	0.118547	0.16117	0.165851	0.188618	0.119573	0.0544948	-0.000455668	-0.0577431	-0.119311	-0.169596	-0.229523	-0.309792	-0.341077	-0.366776	-0.389671	-0.462357	-0.581499	-0.71707	-0.847508	-0.911852	-0.892503	-0.753181
-0.0741583	-0.140506	-0.196944	-0.26302	-0.3109	-0.370818	-0.445401	-0.47447	-0.498348	-0.519622	-0.587159	-0.697861	-0.823829	-0.945028	-1.00481	-0.986835	-0.857382	-0.67865	-0.568188	-0.548014	-0.635899	-0.757907	-0.868392	-0.945196	-1.04137	-1.17652	-1.35697	-1.55124	-1.6593	-1.61919	-1.42877	-1.16673	-1.00371	-0.938244	-0.891947	-0.826657	-0.725931	-0.680596	-0.663418	-0.647842	-0.592971	-0.423465	-0.303036	-0.29637	-0.400447	-0.587046	-0.740655	-0.802222	-0.850492	-0.890759
-1.12559	-1.20001	-1.3165	-1.45973	-1.54097	-1.48802	-1.30147	-1.04473	-0.88502	-0.820886	-0.775528	-0.711561	-0.612879	-0.568463	-0.551633	-0.536373	-0.482615	-0.316547	-0.19856	-0.192029	-0.293995	-0.47681	-0.627303	-0.687622	-0.734914	-0.774364	-0.811104	-0.803827	-0.737886	-0.624863	-0.554773	-0.582853	-0.672098	-0.752936	-0.777962	-0.746875	-0.681514	-0.603198	-0.531611	-0.53807	-0.57063	-0.627922	-0.646387	-0.548734	-0.394696	-0.254914	-0.178538	-0.140121	-0.195911	-0.254404
-1.15441	-0.922028	-0.714273	-0.615142	-0.58337	-0.556058	-0.498496	-0.409694	-0.369726	-0.354581	-0.340849	-0.292474	-0.143033	-0.0368594	-0.0309827	-0.122739	-0.28725	-0.422675	-0.476954	-0.51951	-0.555011	-0.588072	-0.581524	-0.522185	-0.420479	-0.357406	-0.382675	-0.462984	-0.535728	-0.558248	-0.530274	-0.471458	-0.400983	-0.336563	-0.342376	-0.371676	-0.423232	-0.439848	-0.351972	-0.213357	-0.0875714	-0.0188421	0.0157279	-0.0344755	-0.0871122	-0.12529	-0.123934	-0.13421	-0.0974676	-0.0749044
0.390085	0.262777	0.0902909	-0.0669754	-0.171758	-0.206937	-0.17633	-0.111976	-0.0348673	0.0356166	0.0292571	-0.00280137	-0.0592102	-0.0773908	0.0187572	0.17042	0.308047	0.383247	0.421071	0.366142	0.30855	0.266779	0.268262	0.257018	0.29722	0.321907	0.354246	0.402312	0.444753	0.500862	0.474306	0.403489	0.277339	0.190171	0.220455	0.398311	0.557617	0.659386	0.632336	0.526165	0.374311	0.245478	0.161879	0.200712	0.404188	0.708296	1.01302	1.18291	1.2095	1.08175
0.581041	0.540515	0.515498	0.527434	0.556637	0.602115	0.573627	0.497661	0.362337	0.268829	0.301316	0.492106	0.662997	0.772167	0.74315	0.629257	0.466361	0.328159	0.238481	0.280137	0.49841	0.824634	1.15152	1.33376	1.36229	1.22525	1.04791	0.857507	0.82106	0.917029	1.11367	1.3141	1.43431	1.44356	1.40703	1.32266	1.18317	0.966627	0.675034	0.358545	0.0845017	0.0138092	0.153644	0.388274	0.605541	0.707717	0.686595	0.554455	0.403657	0.28203
0.228032	0.23715	0.252866	0.224427	0.147126	0.00323009	-0.137932	-0.251788	-0.280257	-0.191782	-0.0294252	0.157134	0.357377	0.501208	0.591161	0.644517	0.63129	0.659504	0.686742	0.666014	0.574091	0.400553	0.259784	0.0963239	0.0248442	0.0189878	0.112003	0.258959	0.391422	0.432818	0.320877	0.13274	-0.052649	-0.125583	-0.0535732	0.152917	0.372226	0.537087	0.55646	0.505906	0.424989	0.295598	0.146476	0.0155629	-0.0573682	-0.0760168	-0.139322	-0.192258	-0.17807	-0.0948683
0.32243	0.324569	0.324079	0.281284	0.130186	-0.0735866	-0.259319	-0.332387	-0.260244	-0.0533716	0.166343	0.331509	0.350919	0.300271	0.219204	0.0895737	-0.0598246	-0.19098	-0.264047	-0.28273	-0.346152	-0.399186	-0.384972	-0.301616	-0.170264	-0.0260573	0.0928801	0.153991	0.152357	0.144593	0.128977	0.13597	0.173901	0.24945	0.341942	0.403818	0.422517	0.360479	0.197818	-0.0310853	-0.19961	-0.258386	-0.230832	-0.172147	-0.173806	-0.227938	-0.244885	-0.166191	0.0724669	0.333986
-0.598474	-0.564978	-0.574457	-0.609608	-0.717232	-0.866719	-0.984488	-0.992588	-0.90225	-0.731494	-0.461251	-0.116303	0.306192	0.730599	1.04558	1.11596	0.915348	0.551488	0.188746	-0.100289	-0.25986	-0.237214	-0.138643	-0.0780628	-0.145085	-0.319736	-0.511437	-0.748763	-0.953373	-1.15103	-1.29505	-1.38623	-1.42	-1.46414	-1.45598	-1.40627	-1.29598	-1.13941	-0.956476	-0.885764	-0.891428	-0.953862	-0.967193	-0.740375	-0.378617	0.0342881	0.364158	0.573542	0.689369	0.727686
0.201773	0.164198	0.135304	0.124529	0.16241	0.230117	0.247018	0.245695	0.187221	0.113658	0.099193	0.127145	0.205023	0.313214	0.406079	0.409874	0.342936	0.197613	0.0456388	-0.0251435	0.0367375	0.234333	0.467318	0.643207	0.643084	0.490976	0.28568	0.124852	0.0708391	0.0410138	-0.0239272	-0.13289	-0.254626	-0.324451	-0.333382	-0.296796	-0.24834	-0.230484	-0.227812	-0.221104	-0.102618	0.0853439	0.283742	0.359301	0.319995	0.200158	0.0713122	0.0223618	0.0900238	0.210292
-0.244174	-0.325561	-0.372026	-0.387892	-0.252279	-0.0282292	0.211892	0.303339	0.255768	0.11073	-0.0452118	-0.104456	-0.0225651	0.122995	0.260208	0.309269	0.234358	0.114287	-0.0616016	-0.200132	-0.274448	-0.240359	-0.140655	0.00402584	0.165716	0.275721	0.303029	0.241672	0.142581	-0.000178794	-0.139734	-0.296325	-0.413259	-0.454341	-0.498837	-0.456563	-0.361923	-0.23718	-0.00484731	0.255699	0.537393	0.716998	0.726567	0.595616	0.300071	-0.042129	-0.28674	-0.363177	-0.292044	-0.116591
-0.278237	-0.252825	-0.231533	-0.232696	-0.263597	-0.35219	-0.444277	-0.533424	-0.584452	-0.583517	-0.595503	-0.634733	-0.655466	-0.600957	-0.514833	-0.409703	-0.26115	-0.102084	0.0159141	0.128068	0.247228	0.30816	0.277805	0.140287	-0.0291747	-0.174025	-0.165353	-0.0638274	0.113605	0.197369	0.171702	0.0325074	-0.0952785	-0.122434	0.0612398	0.426218	0.852875	1.18383	1.32309	1.19856	0.872583	0.547007	0.386527	0.472196	0.688541	0.937004	1.06567	1.16829	1.17592	1.13409
0.0358793	0.0682771	0.140657	0.200403	0.235239	0.236729	0.143982	-0.00577495	-0.201576	-0.339741	-0.350311	-0.247274	-0.086412	0.094926	0.225899	0.261183	0.239127	0.1495	0.00905889	-0.0516393	-0.0205069	0.0914473	0.21938	0.265803	0.212279	0.138553	0.122056	0.168733	0.292674	0.456025	0.605456	0.676928	0.656249	0.49151	0.226399	-0.0245687	-0.169148	-0.217995	-0.29051	-0.36276	-0.4144	-0.437653	-0.419822	-0.342784	-0.254667	-0.10623	0.00461143	0.0717507	0.0430381	-0.0775881
0.177365	0.279494	0.351309	0.354333	0.315424	0.219458	0.0658177	-0.000585279	0.0334731	0.15595	0.295906	0.346692	0.288138	0.207482	0.189435	0.240499	0.376089	0.554792	0.718268	0.796457	0.773835	0.593612	0.303585	0.0290295	-0.129138	-0.182576	-0.261907	-0.340948	-0.397441	-0.42288	-0.403373	-0.319094	-0.222695	-0.0603068	0.0609523	0.134402	0.102991	-0.0289729	-0.195271	-0.410091	-0.658327	-0.859256	-0.96275	-0.948889	-0.807068	-0.60246	-0.320254	-0.0975204	0.00646462	-0.0641139
-0.567003	-0.563815	-0.534975	-0.45747	-0.371905	-0.217595	-0.0968671	-0.0237396	-0.0550131	-0.186398	-0.351968	-0.565846	-0.812995	-1.01304	-1.11608	-1.10228	-0.961083	-0.757372	-0.476403	-0.254645	-0.151116	-0.221385	-0.399515	-0.625899	-0.787019	-0.820427	-0.786411	-0.759182	-0.778705	-0.896293	-1.13549	-1.43858	-1.67688	-1.69998	-1.54041	-1.28405	-1.03564	-0.850125	-0.72605	-0.595917	-0.443265	-0.405484	-0.475505	-0.608908	-0.727449	-0.863222	-0.994075	-1.15026	-1.19772	-1.08083
-1.05865	-0.91826	-0.756923	-0.630204	-0.571322	-0.577155	-0.69098	-0.922525	-1.21591	-1.44658	-1.46895	-1.31448	-1.06633	-0.825866	-0.64629	-0.526185	-0.400218	-0.25245	-0.215879	-0.283659	-0.412792	-0.52754	-0.658967	-0.785633	-0.936821	-0.982759	-0.869613	-0.607376	-0.270752	0.0793431	0.288246	0.371281	0.338692	0.213283	0.0993409	0.00628723	-0.110124	-0.295824	-0.441502	-0.465681	-0.300342	-0.0380227	0.218915	0.402839	0.541666	0.592686	0.544873	0.358826	0.092803	-0.175994
-0.213968	0.0123312	0.239746	0.488165	0.633078	0.690717	0.661732	0.55019	0.448846	0.366082	0.262543	0.0973769	-0.0321929	-0.0536984	0.0933585	0.326672	0.555198	0.718785	0.842261	0.88764	0.845114	0.679639	0.443032	0.203957	-0.0253604	-0.193159	-0.310362	-0.343398	-0.309588	-0.180648	0.0102964	0.114304	0.0808274	-0.0615348	-0.165248	-0.2029	-0.193573	-0.16587	-0.17749	-0.148386	-0.105107	-0.0122207	0.0355704	0.0579717	0.052952	0.0199526	-0.0380776	-0.0727741	-0.0419665	0.0911417
0.619704	0.424876	0.220879	0.0651598	-0.0486868	-0.122934	-0.0899892	-0.0605976	-0.0400816	-0.0755831	-0.147472	-0.236285	-0.311016	-0.340354	-0.315651	-0.212753	-0.131797	-0.0121881	0.145817	0.258291	0.224621	0.116879	-0.0528721	-0.2343	-0.344079	-0.390656	-0.332042	-0.239367	-0.126959	-0.00209173	0.140655	0.26713	0.330342	0.319902	0.237404	0.155423	0.102178	0.150122	0.268142	0.449508	0.579565	0.661128	0.653907	0.58155	0.471313	0.357701	0.297062	0.32467	0.398264	0.409606
0.466081	0.413667	0.339297	0.236099	0.147464	0.097206	0.144553	0.261104	0.440212	0.568648	0.649196	0.642065	0.570609	0.461745	0.349548	0.289664	0.316928	0.389605	0.400806	0.333379	0.204371	0.0851505	0.055408	0.10507	0.256064	0.438173	0.548134	0.598903	0.595377	0.615754	0.627473	0.618556	0.610078	0.576798	0.562904	0.579635	0.563967	0.468068	0.276862	0.0545474	-0.0377726	0.0858687	0.376093	0.71764	0.991048	1.11373	1.10835	0.949504	0.746809	0.571776
0.612518	0.681776	0.633462	0.567485	0.457114	0.373613	0.395322	0.469739	0.562932	0.601624	0.592728	0.517224	0.383081	0.254366	0.206839	0.243644	0.301342	0.336678	0.320999	0.235112	0.160303	0.0831912	0.0244937	-0.0443868	-0.176446	-0.300139	-0.37827	-0.401704	-0.334763	-0.251517	-0.145413	-0.0260352	-0.00390315	-0.0944276	-0.297382	-0.54762	-0.742514	-0.802063	-0.763282	-0.687743	-0.642027	-0.597764	-0.572797	-0.525274	-0.381533	-0.11779	0.171096	0.460734	0.683329	0.842207
-0.239255	-0.187138	-0.169667	-0.198393	-0.313483	-0.430041	-0.507436	-0.53065	-0.464339	-0.381876	-0.276771	-0.158517	-0.136593	-0.226265	-0.42731	-0.675193	-0.868252	-0.927241	-0.888825	-0.813997	-0.768711	-0.724865	-0.700133	-0.653057	-0.510669	-0.249408	0.0367593	0.323672	0.544172	0.701555	0.74558	0.657719	0.492217	0.302612	0.12315	0.0175924	-0.00201897	-0.0123945	0.0171812	0.00330742	-0.10078	-0.293681	-0.542937	-0.720808	-0.778813	-0.699366	-0.538434	-0.319198	-0.214653	-0.247697
-0.37878	-0.184923	-0.0454206	0.0197159	0.0453991	0.0520289	0.0546316	0.050144	-0.0729726	-0.262932	-0.465729	-0.698754	-0.789158	-0.725842	-0.593843	-0.44669	-0.245985	-0.0650323	0.140953	0.315386	0.423259	0.461311	0.393409	0.305314	0.200155	0.0639344	-0.11421	-0.27095	-0.41729	-0.462979	-0.316549	-0.0678848	0.173134	0.330947	0.340852	0.229306	-0.00488131	-0.228763	-0.319812	-0.268036	-0.128943	0.0128435	0.0816663	0.0964545	0.123483	0.1383	0.122452	0.0651279	0.0102166	-0.0439897
-0.23109	-0.389197	-0.613594	-0.787022	-0.881358	-0.859165	-0.756973	-0.667971	-0.63912	-0.64075	-0.605195	-0.520323	-0.435296	-0.442306	-0.533459	-0.702588	-0.768339	-0.724178	-0.531432	-0.26892	0.0153453	0.18868	0.192851	0.104424	-0.00855766	-0.110815	-0.206253	-0.143899	0.00474722	0.127192	0.156189	0.0834108	0.0738966	0.154732	0.395741	0.724061	1.02466	1.14445	1.08442	1.00683	0.955662	1.01426	1.17122	1.49373	1.84106	2.06888	2.05071	1.80934	1.47541	1.1259
0.455083	0.0726361	-0.293687	-0.621549	-0.83459	-0.917794	-0.866291	-0.690429	-0.497648	-0.427997	-0.537733	-0.746928	-0.876638	-0.8326	-0.689041	-0.551384	-0.53048	-0.647671	-0.846528	-0.97143	-1.10369	-1.21524	-1.2949	-1.26661	-1.0977	-0.793999	-0.374417	0.0344412	0.281824	0.262535	0.0219058	-0.299114	-0.560218	-0.67112	-0.65436	-0.621688	-0.579193	-0.5729	-0.63174	-0.710763	-0.701419	-0.61558	-0.476527	-0.277521	-0.0754085	0.11059	0.210314	0.247326	0.22041	0.151846
-0.369953	-0.275542	-0.228758	-0.265082	-0.339494	-0.439949	-0.494234	-0.524946	-0.557924	-0.581816	-0.555757	-0.467054	-0.310971	-0.17943	-0.0993015	-0.0946127	-0.132235	-0.161548	-0.198535	-0.227261	-0.301762	-0.455584	-0.618529	-0.756313	-0.780417	-0.673081	-0.504235	-0.349722	-0.301459	-0.37729	-0.545708	-0.764668	-0.876094	-0.855643	-0.685403	-0.436538	-0.227069	-0.0974252	-0.109691	-0.12975	-0.112117	-0.0343808	0.0242881	0.0502193	0.0380294	0.0103475	-0.0597751	-0.143199	-0.187686	-0.217423
0.797946	0.648703	0.519657	0.466724	0.537814	0.688019	0.8516	1.00852	1.09663	1.16035	1.16795	1.15012	1.16686	1.18716	1.16994	1.09639	0.965503	0.774319	0.52863	0.294886	0.131798	0.0901539	0.150887	0.24755	0.319189	0.288941	0.204194	0.143377	0.193825	0.274019	0.368155	0.454097	0.502907	0.500057	0.472991	0.487462	0.544963	0.709932	0.918329	1.06267	1.09923	0.967975	0.711406	0.388307	0.11666	-0.0241407	-0.00258026	0.140172	0.32089	0.487659
-1.23382	-0.881909	-0.505173	-0.177357	0.0547513	0.108809	0.0941766	0.0912727	0.167344	0.270121	0.336129	0.315548	0.300258	0.316981	0.314926	0.222234	-0.0190942	-0.342603	-0.631779	-0.74512	-0.686555	-0.508673	-0.315224	-0.0959717	0.105223	0.239337	0.289442	0.24432	0.144176	0.10736	0.13168	0.282627	0.453509	0.566968	0.590803	0.431231	0.247163	0.0909001	-0.0318932	-0.202021	-0.339493	-0.492258	-0.56858	-0.606285	-0.630697	-0.654477	-0.656191	-0.575052	-0.400304	-0.146073
0.650904	0.537054	0.440843	0.339866	0.284936	0.255548	0.252397	0.268585	0.282697	0.257817	0.206554	0.0951267	0.00964481	-0.0573135	-0.0601787	-0.0136541	0.030593	0.0410681	0.0234105	0.00556692	0.00879814	-5.79252e-05	-0.0391418	-0.121231	-0.244817	-0.396604	-0.552052	-0.63956	-0.676263	-0.614321	-0.542702	-0.541802	-0.516295	-0.458912	-0.390191	-0.311723	-0.315454	-0.387146	-0.49069	-0.642763	-0.74433	-0.733734	-0.574322	-0.31288	-0.00522338	0.335682	0.639574	0.826898	0.875944	0.785732
-1.14198	-1.22845	-1.21009	-1.0547	-0.787417	-0.501841	-0.296343	-0.184744	-0.183819	-0.252527	-0.380116	-0.538925	-0.695024	-0.808281	-0.836194	-0.836465	-0.7563	-0.564448	-0.278976	-0.0225084	0.103713	0.0546547	-0.126009	-0.300141	-0.370194	-0.394982	-0.443716	-0.544151	-0.66087	-0.718401	-0.723643	-0.739272	-0.748785	-0.78915	-0.814018	-0.763254	-0.658307	-0.561703	-0.531299	-0.555903	-0.588458	-0.571591	-0.474587	-0.373649	-0.35179	-0.414847	-0.521255	-0.583754	-0.577733	-0.504574
0.690944	0.431783	0.166475	-0.0729288	-0.178013	0.00659788	0.353071	0.636071	0.748338	0.706242	0.692436	0.695981	0.85797	1.13485	1.47636	1.78554	2.05619	2.21314	2.24586	2.11549	1.81989	1.46369	1.19883	1.15654	1.3033	1.4919	1.64151	1.66414	1.60003	1.52252	1.43198	1.30647	1.15523	1.02702	1.05152	1.23932	1.49703	1.66079	1.638	1.43316	1.16335	0.885854	0.696177	0.632907	0.670931	0.708394	0.73164	0.738543	0.749473	0.761842
-0.922742	-1.19933	-1.44467	-1.6594	-1.77424	-1.77114	-1.6242	-1.36002	-1.08303	-0.89121	-0.779824	-0.798311	-0.839526	-0.801388	-0.73298	-0.650301	-0.618295	-0.658424	-0.765614	-0.922936	-1.12581	-1.31119	-1.48177	-1.55096	-1.52102	-1.45449	-1.38161	-1.33907	-1.35193	-1.47527	-1.63568	-1.77356	-1.87854	-1.85143	-1.72274	-1.49639	-1.28782	-1.18024	-1.21195	-1.34433	-1.5194	-1.61733	-1.64095	-1.59423	-1.4745	-1.37717	-1.27134	-1.16105	-1.09385	-1.13621
-0.398151	-0.553987	-0.769627	-0.970032	-1.12026	-1.23338	-1.20571	-1.07438	-0.843391	-0.630547	-0.520754	-0.553116	-0.688209	-0.866875	-0.96681	-0.990916	-0.943233	-0.821049	-0.721727	-0.61373	-0.501176	-0.432595	-0.475821	-0.610211	-0.829973	-1.07237	-1.3008	-1.38563	-1.32937	-1.16154	-0.961413	-0.820003	-0.723794	-0.750571	-0.863825	-1.02748	-1.19415	-1.24372	-1.11333	-0.849872	-0.571715	-0.354697	-0.295691	-0.410668	-0.595384	-0.721094	-0.685919	-0.528149	-0.448008	-0.467854
-0.770516	-0.663013	-0.442084	-0.131931	0.169112	0.397297	0.462365	0.335575	0.13188	-0.00674649	0.0320425	0.206023	0.294399	0.272513	0.0482564	-0.248592	-0.502825	-0.595748	-0.569102	-0.500908	-0.44305	-0.404946	-0.311991	-0.205769	-0.0598938	0.0877909	0.141778	0.0876663	-0.0029572	-0.0492179	-0.00940777	0.0614832	0.100538	0.0976883	0.151399	0.203001	0.245522	0.243142	0.187556	0.117452	0.0948301	0.190557	0.331846	0.475411	0.540365	0.525197	0.391028	0.16606	-0.0493886	-0.207684
-0.357185	-0.313934	-0.275006	-0.241457	-0.159866	-0.0519695	0.0842325	0.222124	0.27253	0.222007	0.137393	0.0942004	0.131371	0.197561	0.234025	0.231365	0.281514	0.329694	0.369395	0.367173	0.315273	0.249818	0.228696	0.318075	0.449994	0.584039	0.644685	0.630524	0.505252	0.295202	0.094041	-0.0537568	-0.0586487	0.0042296	0.0559118	0.0557071	-0.0410767	-0.157288	-0.288185	-0.429433	-0.498089	-0.440938	-0.310782	-0.165062	-0.0653562	0.0183541	0.166891	0.42063	0.708038	0.943452
0.283865	0.233761	0.188631	0.191807	0.298529	0.439555	0.578885	0.641922	0.627202	0.496991	0.278661	0.0695705	-0.0840537	-0.0891384	-0.0237814	0.0299382	0.0297254	-0.0708737	-0.191666	-0.327723	-0.47454	-0.545902	-0.486497	-0.351211	-0.199747	-0.0961103	-0.00910017	0.145292	0.409034	0.707771	0.952465	1.03013	0.926152	0.807691	0.751423	0.861418	1.07605	1.29641	1.37858	1.27713	1.03327	0.704316	0.404165	0.2569	0.353251	0.607188	0.84532	0.998441	1.03766	1.00437
-1.05038	-0.734997	-0.470528	-0.274823	-0.159674	-0.0715141	0.0745401	0.324039	0.606643	0.838123	0.911593	0.81323	0.701167	0.647938	0.751992	0.955033	1.1635	1.24122	1.14526	0.914564	0.603375	0.319433	0.180121	0.271269	0.511492	0.736764	0.881616	0.918721	0.887228	0.856877	0.893479	0.963833	1.0541	1.02836	0.866123	0.703501	0.606416	0.675787	0.835033	1.04977	1.14143	1.16616	1.14669	1.17341	1.26394	1.33191	1.32974	1.25365	1.15609	1.0443
0.385021	0.224215	0.0812328	-0.0214896	-0.0765869	-0.0675612	-0.0108535	0.107795	0.205601	0.285621	0.323334	0.335194	0.231311	0.11162	0.00212397	-0.0254391	0.0384425	0.135094	0.231938	0.301654	0.346597	0.414141	0.512591	0.580044	0.582121	0.525396	0.439419	0.37969	0.330638	0.220914	0.0242194	-0.202316	-0.378535	-0.463387	-0.456161	-0.389199	-0.293039	-0.30667	-0.403426	-0.594535	-0.79827	-0.89575	-0.852204	-0.67636	-0.469379	-0.317282	-0.236523	-0.259597	-0.355788	-0.454867
-0.159089	-0.146185	-0.104077	-0.0354406	0.0841926	0.17981	0.261424	0.299889	0.311985	0.206032	0.0839559	-0.0277217	-0.0558341	0.00932053	0.107898	0.206671	0.277777	0.323616	0.392506	0.492918	0.561715	0.563833	0.505978	0.418287	0.357368	0.307339	0.195428	-0.00518597	-0.236236	-0.415966	-0.502509	-0.495139	-0.426842	-0.328766	-0.342669	-0.441354	-0.63627	-0.844066	-0.943488	-0.899074	-0.719726	-0.50862	-0.353493	-0.271124	-0.294658	-0.392766	-0.493819	-0.575963	-0.653799	-0.72581
0.157648	0.31143	0.396121	0.388367	0.321085	0.223095	0.155469	0.0999313	-0.0242995	-0.247	-0.503487	-0.703004	-0.799074	-0.790893	-0.715077	-0.606204	-0.621638	-0.731186	-0.947562	-1.17823	-1.2886	-1.2393	-1.04021	-0.805859	-0.633653	-0.542216	-0.56834	-0.677249	-0.789428	-0.880615	-0.96702	-1.04696	-1.15888	-1.25453	-1.29373	-1.22087	-1.06238	-0.850897	-0.713263	-0.709285	-0.777408	-0.883461	-0.97245	-1.02553	-1.0207	-0.972656	-0.90845	-0.790774	-0.623647	-0.474343
-0.129013	-0.0433165	-0.0124117	-0.0966155	-0.304968	-0.555632	-0.755899	-0.852331	-0.844119	-0.768018	-0.658735	-0.674227	-0.784188	-1.00138	-1.23292	-1.3437	-1.29421	-1.09437	-0.859141	-0.686287	-0.594506	-0.620729	-0.730047	-0.842648	-0.934178	-1.02091	-1.10115	-1.21349	-1.3095	-1.34885	-1.27572	-1.11663	-0.904349	-0.766197	-0.762204	-0.830583	-0.937035	-1.02636	-1.07964	-1.07479	-1.02657	-0.962118	-0.843999	-0.676244	-0.526378	-0.45206	-0.430332	-0.453614	-0.550605	-0.641175
0.932774	0.851653	0.702196	0.534226	0.394353	0.293367	0.276655	0.365475	0.488009	0.574979	0.562107	0.449267	0.221691	-0.0646184	-0.287389	-0.372845	-0.308941	-0.168387	0.00165373	0.13059	0.194983	0.250713	0.310948	0.349547	0.390278	0.428568	0.456462	0.457192	0.518076	0.649194	0.755696	0.857692	0.872228	0.719143	0.467585	0.208919	0.0182546	-0.0948449	-0.193305	-0.209565	-0.235564	-0.254667	-0.247772	-0.222349	-0.212466	-0.187558	-0.0971707	0.0872549	0.296544	0.416977
0.313591	0.257305	0.238422	0.240747	0.252922	0.246618	0.308799	0.442708	0.551477	0.655645	0.670491	0.514146	0.257232	-0.0069413	-0.201666	-0.317174	-0.41773	-0.434336	-0.46089	-0.480399	-0.473357	-0.447392	-0.4373	-0.411861	-0.319549	-0.131196	0.0825487	0.205546	0.231669	0.143108	-0.0316064	-0.20792	-0.345225	-0.337791	-0.202043	0.0512962	0.342429	0.615967	0.713992	0.683302	0.523328	0.281913	0.0332198	-0.149591	-0.233532	-0.256713	-0.207019	-0.105266	0.116324	0.353426
-0.258552	-0.0754238	0.0793281	0.157749	0.152902	0.0587576	-0.108365	-0.277017	-0.408355	-0.401244	-0.271395	-0.0290648	0.249417	0.511068	0.604833	0.575477	0.422455	0.19153	-0.0463557	-0.221223	-0.301515	-0.323689	-0.276155	-0.178823	0.0331369	0.259936	0.514503	0.696656	0.796349	0.801383	0.692743	0.50472	0.317524	0.15541	0.0427647	-0.0243797	-0.0185884	0.0735968	0.166701	0.17634	0.0755366	-0.0993604	-0.239095	-0.304613	-0.314279	-0.292817	-0.344009	-0.421882	-0.476507	-0.420156
-0.15032	-0.0762051	-0.0570418	-0.0599084	-0.0820755	-0.0558617	0.0376377	0.132069	0.141845	0.0396051	-0.137785	-0.279512	-0.345964	-0.355768	-0.334	-0.385922	-0.464905	-0.520308	-0.463154	-0.320028	-0.176371	-0.0316662	-0.0376355	-0.147193	-0.344713	-0.581535	-0.784569	-0.895281	-0.953716	-0.915176	-0.793358	-0.670951	-0.519581	-0.424443	-0.345096	-0.292181	-0.256033	-0.247494	-0.195614	-0.110375	-0.0253924	0.0384216	0.0485466	0.0202501	-0.0672489	-0.171821	-0.204808	-0.216867	-0.21956	-0.202359
0.187984	0.214494	0.323947	0.500961	0.629063	0.694778	0.659587	0.588383	0.474131	0.346246	0.212498	0.108245	0.0743878	0.145853	0.286227	0.416674	0.519168	0.573214	0.601756	0.60144	0.598975	0.597318	0.638114	0.731436	0.886523	1.00079	1.07434	1.03562	0.867645	0.628578	0.422307	0.379822	0.417141	0.444203	0.425868	0.336842	0.269198	0.282426	0.373287	0.455761	0.454048	0.372496	0.28579	0.24912	0.266502	0.30729	0.337339	0.419712	0.502002	0.602479
0.568577	0.539921	0.528067	0.522338	0.56312	0.660639	0.822488	0.941732	1.01849	0.978084	0.802787	0.553296	0.338031	0.293694	0.33264	0.360882	0.341747	0.24884	0.178246	0.192051	0.286874	0.372944	0.371156	0.286048	0.195562	0.157293	0.175433	0.217999	0.249358	0.335323	0.421201	0.526059	0.599291	0.591022	0.51035	0.389641	0.346244	0.453807	0.72034	0.931044	1.03479	0.963233	0.753509	0.48761	0.214893	-0.0472951	-0.315905	-0.551321	-0.644002	-0.580024
-0.895066	-0.66171	-0.321406	0.132813	0.549985	0.789053	0.843698	0.767874	0.66167	0.577217	0.515877	0.464224	0.328865	0.15194	-0.0579725	-0.189665	-0.21789	-0.138861	-0.0499312	-0.116285	-0.339349	-0.663721	-0.887419	-1.0219	-0.989751	-0.843696	-0.661278	-0.53904	-0.475647	-0.449098	-0.528628	-0.623065	-0.6668	-0.679569	-0.598317	-0.466034	-0.26836	-0.067728	0.0837561	0.153681	0.158957	0.059796	-0.12274	-0.373646	-0.635083	-0.8	-0.892436	-0.870571	-0.768668	-0.635136
0.854248	0.677592	0.519957	0.404539	0.383398	0.42079	0.460356	0.492286	0.430398	0.310799	0.198416	0.159847	0.139492	0.129637	0.0633758	0.0195806	0.0804469	0.202379	0.380189	0.550471	0.685953	0.800655	0.816541	0.759678	0.670009	0.603869	0.580468	0.620105	0.670225	0.769314	0.879564	1.02172	1.16187	1.29819	1.42336	1.46926	1.49157	1.46167	1.45025	1.45455	1.53332	1.65999	1.71841	1.63102	1.35132	1.0226	0.788165	0.763661	0.885327	1.05013
-0.123862	-0.145398	-0.216014	-0.25665	-0.302769	-0.325562	-0.319864	-0.285558	-0.166023	-0.0351731	0.0928107	0.196901	0.236451	0.228215	0.259255	0.315016	0.357986	0.387298	0.353893	0.206915	-0.0153663	-0.255584	-0.467768	-0.533367	-0.414173	-0.191208	-0.0115869	0.00205981	-0.158367	-0.396529	-0.62022	-0.744331	-0.727524	-0.615828	-0.369907	-0.0665578	0.176506	0.313257	0.355403	0.32443	0.288362	0.25866	0.284705	0.379562	0.436543	0.507973	0.493861	0.445537	0.354655	0.188683
1.21232	1.01694	0.642607	0.177391	-0.246866	-0.521907	-0.585296	-0.51643	-0.414234	-0.373674	-0.424419	-0.576632	-0.65725	-0.674942	-0.632569	-0.517538	-0.398092	-0.356485	-0.439326	-0.64534	-0.888191	-1.11029	-1.25785	-1.30992	-1.32382	-1.31169	-1.20767	-0.945905	-0.584435	-0.217473	0.0373438	0.0844718	0.0106196	-0.188167	-0.382643	-0.519929	-0.580049	-0.611728	-0.614745	-0.627304	-0.584598	-0.507473	-0.401028	-0.272029	-0.0866849	0.104076	0.311481	0.46505	0.51077	0.445584
-0.177772	-0.111002	-0.0207516	0.0787551	0.243578	0.417026	0.613383	0.758772	0.802057	0.740343	0.637949	0.536586	0.450064	0.402215	0.384613	0.420079	0.432464	0.374782	0.271615	0.170847	0.161651	0.2092	0.289877	0.297853	0.195226	0.0973918	0.072729	0.0943403	0.0677066	0.0212242	-0.031093	0.007735	0.105143	0.199483	0.196267	0.0835601	-0.0906889	-0.242252	-0.290813	-0.224114	-0.0158342	0.15583	0.211923	0.120789	-0.0995212	-0.374684	-0.548513	-0.586715	-0.437136	-0.120382
-0.581456	-0.3324	-0.0408553	0.151379	0.206644	0.108006	-0.125381	-0.416875	-0.601022	-0.641492	-0.483034	-0.14748	0.235647	0.499658	0.553345	0.405166	0.172698	-0.0762368	-0.239377	-0.241212	-0.097056	0.110135	0.317303	0.400384	0.396572	0.258511	0.126654	0.0957087	0.105804	0.144431	0.153668	0.132693	0.109939	0.186129	0.315171	0.501809	0.710358	0.847607	0.913571	0.88124	0.748158	0.577754	0.455427	0.520842	0.704923	0.998821	1.27357	1.50444	1.6466	1.66563
-0.350602	-0.292963	-0.179827	-0.094031	-0.0233613	-0.00432924	-0.0257104	-0.0489047	0.0287592	0.160298	0.350547	0.56313	0.703034	0.770274	0.737318	0.601661	0.427961	0.303267	0.369948	0.55759	0.857173	1.13724	1.37258	1.51748	1.53688	1.47647	1.358	1.27961	1.25445	1.3327	1.47156	1.62024	1.69984	1.68156	1.5416	1.27407	0.954939	0.647187	0.437031	0.302649	0.231737	0.129096	-0.0244589	-0.214827	-0.371937	-0.484282	-0.5115	-0.436044	-0.290891	-0.138423
-1.08438	-0.980845	-0.840244	-0.681053	-0.540398	-0.463358	-0.447715	-0.467285	-0.490178	-0.506022	-0.486998	-0.451469	-0.44462	-0.511737	-0.556517	-0.56952	-0.519523	-0.454342	-0.374418	-0.331169	-0.332368	-0.337089	-0.370814	-0.469279	-0.624845	-0.742909	-0.866674	-0.957881	-1.00808	-1.05064	-1.02376	-0.941647	-0.746169	-0.50203	-0.327346	-0.277329	-0.296705	-0.362014	-0.368043	-0.361708	-0.270191	-0.184378	-0.158659	-0.231261	-0.345807	-0.450295	-0.544596	-0.633929	-0.681551	-0.669843
-0.423253	-0.445572	-0.440942	-0.363534	-0.269442	-0.205296	-0.196146	-0.182825	-0.155969	-0.140138	-0.0391162	0.0620826	0.182824	0.268553	0.379082	0.493316	0.491979	0.331263	0.0884089	-0.168123	-0.391674	-0.560461	-0.749795	-0.939265	-1.1141	-1.25289	-1.28835	-1.24248	-1.19631	-1.12193	-1.01468	-0.964644	-0.911851	-0.93324	-1.03201	-1.18003	-1.25622	-1.23029	-1.05822	-0.713806	-0.380733	-0.153309	-0.136164	-0.314738	-0.553439	-0.700365	-0.684811	-0.463853	-0.185636	-0.00758797
-0.165461	-0.111618	-0.070584	-0.0612014	-0.0526922	-0.067388	-0.137532	-0.258561	-0.436437	-0.682051	-0.944477	-1.15723	-1.22118	-1.08285	-0.821843	-0.565102	-0.341121	-0.15938	-0.0321423	0.122967	0.27668	0.35121	0.332287	0.196708	0.0412659	-0.0878196	-0.111865	-0.0760173	0.0238845	0.0823076	0.0469491	-0.120383	-0.317164	-0.466475	-0.466687	-0.294359	-0.0694883	0.144019	0.267632	0.326735	0.324659	0.242196	0.178276	0.204486	0.340436	0.508137	0.631421	0.640056	0.489402	0.284758
-0.505475	-0.44851	-0.382167	-0.290414	-0.205309	-0.172627	-0.2102	-0.232237	-0.185698	-0.0300618	0.144477	0.321547	0.46979	0.548036	0.533847	0.466328	0.394821	0.365411	0.3748	0.353168	0.278242	0.169153	0.0564191	-0.0202251	-0.0773819	-0.146912	-0.171565	-0.182569	-0.22651	-0.284422	-0.349824	-0.407374	-0.412548	-0.32703	-0.16834	-0.0270878	0.0573728	0.0282491	-0.039703	-0.129219	-0.202384	-0.19195	-0.0883461	0.0693614	0.239459	0.384163	0.369022	0.253759	0.0154866	-0.176195
-0.249919	-0.156583	-0.136457	-0.183351	-0.205898	-0.16026	-0.00782999	0.163113	0.336535	0.481725	0.558359	0.544461	0.478334	0.4083	0.379496	0.388692	0.367505	0.294123	0.187281	0.0768694	0.00180412	-0.0541753	-0.122273	-0.146418	-0.157195	-0.200231	-0.25695	-0.321004	-0.377369	-0.382437	-0.298681	-0.143259	-0.00491722	0.0778034	0.0492797	-0.0172726	-0.104944	-0.176602	-0.166383	-0.0649136	0.0895451	0.256138	0.397861	0.383033	0.270144	0.0367801	-0.150953	-0.233222	-0.286711	-0.371925
0.398403	0.390596	0.363931	0.303672	0.202971	0.0381457	-0.121097	-0.22899	-0.272914	-0.251328	-0.181578	-0.153957	-0.139991	-0.20743	-0.323825	-0.49153	-0.640557	-0.652398	-0.49799	-0.290254	-0.160503	-0.204537	-0.375648	-0.454232	-0.4598	-0.345598	-0.213013	-0.0948237	0.0779456	0.326322	0.607507	0.89458	1.02649	0.995434	0.848901	0.695538	0.574346	0.491737	0.472422	0.499772	0.511809	0.448539	0.313052	0.192099	0.109512	0.134753	0.21667	0.325694	0.439706	0.594429
-1.37867	-1.05394	-0.696278	-0.373681	-0.139464	-0.039278	-0.0741586	-0.168701	-0.27594	-0.31566	-0.288931	-0.158818	0.00396589	0.150419	0.202587	0.166896	0.0375144	-0.176606	-0.463322	-0.757576	-1.01911	-1.18597	-1.19839	-1.09674	-0.916681	-0.677887	-0.447519	-0.254875	-0.0316961	0.118992	0.179973	0.164438	0.152558	0.195734	0.325279	0.511717	0.692708	0.74813	0.608531	0.362965	0.11454	-0.0626501	-0.136909	-0.127849	-0.0850087	-0.0339003	0.0318934	0.0815976	0.0631012	-0.0670137
-1.41116	-1.37205	-1.24868	-1.07498	-0.860533	-0.593777	-0.339831	-0.127471	0.11855	0.284661	0.351884	0.334758	0.321662	0.369257	0.512061	0.717581	0.917095	0.978189	0.824303	0.553604	0.279753	0.0844281	0.0025688	0.012556	0.0597813	0.11612	0.188648	0.243439	0.22305	0.079618	-0.0773712	-0.173562	-0.133211	-0.00324566	0.120628	0.102515	-0.0817193	-0.420235	-0.675386	-0.714877	-0.504023	-0.254545	-0.136126	-0.211276	-0.465864	-0.693457	-0.817232	-0.817538	-0.777833	-0.694548
0.443446	0.428872	0.339223	0.155726	-0.0161897	-0.119836	-0.0790986	0.052111	0.177171	0.158884	-0.027114	-0.368871	-0.626465	-0.666334	-0.453461	-0.201595	-0.0820415	-0.157911	-0.414937	-0.644709	-0.769669	-0.769978	-0.729893	-0.64581	-0.692287	-0.893816	-1.16621	-1.40568	-1.49821	-1.41463	-1.1577	-0.841694	-0.53416	-0.344719	-0.297555	-0.332127	-0.332993	-0.298104	-0.220442	-0.18239	-0.158822	-0.130282	-0.147723	-0.147108	-0.102863	-0.0186189	0.105177	0.223086	0.227713	0.132231
-0.467394	-0.277079	-0.137504	-0.0208383	0.030919	0.0556351	0.0781143	0.0643775	0.0648618	0.0997108	0.166064	0.26357	0.35644	0.360084	0.284879	0.147364	0.042344	0.0361925	0.0226908	0.0459941	0.0174337	-0.0489816	-0.121008	-0.102429	-0.091914	-0.078889	-0.130796	-0.160683	-0.172864	-0.198609	-0.173551	-0.135129	-0.101553	-0.0955853	-0.113863	-0.140162	-0.144016	-0.146963	-0.147207	-0.121551	-0.102205	-0.0949693	-0.0538621	0.0322991	0.151268	0.246741	0.300844	0.346268	0.394961	0.376706
0.273867	0.340121	0.392391	0.367239	0.271105	0.12235	0.0106594	0.00411729	-0.0102421	0.0145415	-0.0158331	-0.0864671	-0.163069	-0.14331	-0.132127	-0.118274	-0.173479	-0.205264	-0.218219	-0.245599	-0.218949	-0.178086	-0.142378	-0.136031	-0.15547	-0.18344	-0.187538	-0.190672	-0.190932	-0.163647	-0.143071	-0.135376	-0.0916577	-2.34524e-05	0.126502	0.22804	0.28558	0.333888	0.385674	0.366261	0.323394	0.346744	0.371332	0.398717	0.32551	0.253452	0.215762	0.255283	0.375434	0.562893
-0.287127	-0.219211	-0.123024	-0.0443942	0.00463383	0.0225581	0.00356079	-0.0237731	-0.0277784	-0.0308412	-0.0310946	-0.00442979	0.0156779	0.0231983	0.0659231	0.155475	0.279125	0.378355	0.434587	0.481798	0.532407	0.513435	0.471542	0.494362	0.51839	0.545153	0.473609	0.403189	0.366357	0.404978	0.522399	0.705598	0.801144	0.770105	0.66669	0.546599	0.388855	0.18928	-0.0469344	-0.212644	-0.244726	-0.123207	0.110077	0.272655	0.293949	0.191706	0.070934	0.0217679	0.149857	0.447393
0.851486	0.694392	0.492366	0.359491	0.295157	0.330994	0.457063	0.653754	0.756336	0.723012	0.61198	0.483045	0.313684	0.0994104	-0.1542	-0.332115	-0.366559	-0.236091	0.0143746	0.188926	0.211788	0.102015	-0.0276514	-0.0804384	0.0570843	0.376533	0.730364	0.923184	0.920403	0.778312	0.63793	0.57625	0.62299	0.759874	0.829406	0.772851	0.621638	0.463184	0.38786	0.341564	0.303365	0.285788	0.239411	0.195666	0.269344	0.44858	0.652459	0.776834	0.801352	0.862947
-0.0610317	-0.0596414	-0.0028661	0.0671708	0.147379	0.189576	0.212148	0.249244	0.29772	0.350439	0.277262	0.0914943	-0.146171	-0.330865	-0.441233	-0.424145	-0.391731	-0.378848	-0.380387	-0.363283	-0.352407	-0.397936	-0.492508	-0.620992	-0.778145	-0.927024	-1.04426	-1.13333	-1.11576	-1.06236	-1.0135	-0.987409	-1.01535	-1.04622	-1.04235	-0.959867	-0.801844	-0.633838	-0.503283	-0.395646	-0.345895	-0.320414	-0.301756	-0.23276	-0.134665	-0.0502291	0.0215254	0.0844083	0.129332	0.117079
0.313063	0.350117	0.284764	0.106756	-0.135141	-0.331984	-0.462849	-0.502244	-0.487692	-0.432897	-0.362216	-0.321102	-0.303675	-0.401215	-0.634096	-0.934951	-1.11554	-1.23518	-1.19359	-1.00595	-0.809846	-0.599157	-0.399811	-0.210037	-0.115328	-0.10172	-0.158405	-0.231367	-0.345529	-0.462408	-0.514633	-0.481495	-0.408475	-0.327536	-0.2182	-0.0286493	0.227808	0.507108	0.675523	0.740103	0.60553	0.350155	0.0557248	-0.159526	-0.273279	-0.244382	-0.161362	-0.0227284	0.0542253	0.0755937
0.444865	0.286145	0.216821	0.132875	0.104565	0.0656887	-0.022453	-0.139194	-0.232856	-0.293596	-0.328149	-0.32862	-0.316048	-0.313053	-0.325332	-0.396096	-0.444332	-0.417437	-0.363997	-0.370865	-0.495776	-0.646936	-0.723163	-0.679147	-0.559988	-0.447877	-0.456012	-0.57877	-0.704235	-0.717625	-0.613221	-0.488336	-0.401804	-0.417916	-0.504295	-0.633147	-0.758151	-0.852356	-0.920304	-1.05346	-1.23598	-1.42088	-1.50041	-1.43204	-1.25534	-0.952926	-0.64027	-0.4347	-0.401344	-0.525746
-0.473109	-0.601242	-0.688977	-0.704405	-0.632068	-0.500521	-0.394321	-0.402027	-0.518313	-0.637163	-0.649847	-0.550948	-0.432647	-0.350676	-0.365939	-0.447764	-0.569823	-0.688237	-0.777476	-0.841842	-0.967973	-1.14087	-1.31602	-1.39137	-1.32659	-1.15922	-0.872743	-0.576571	-0.381838	-0.35024	-0.468084	-0.708979	-0.992695	-1.23247	-1.28925	-1.19022	-0.997613	-0.783472	-0.589035	-0.449467	-0.304488	-0.147643	0.0133103	0.184954	0.374333	0.488195	0.486858	0.365893	0.182405	-0.00582196
-0.88709	-0.660803	-0.424002	-0.157527	-0.00832081	0.021574	-0.0363832	-0.200232	-0.356664	-0.418836	-0.499918	-0.605481	-0.748449	-0.976622	-1.14774	-1.23387	-1.14229	-0.892445	-0.567973	-0.315285	-0.229853	-0.325691	-0.507413	-0.594129	-0.580388	-0.430063	-0.188036	0.0746334	0.319526	0.566494	0.82895	1.01817	1.06863	0.914155	0.655345	0.449684	0.335132	0.286018	0.173031	0.050397	-0.0452259	0.0312122	0.232521	0.54636	0.894841	1.13162	1.11182	0.853159	0.522844	0.221363
-0.542259	-0.570545	-0.675459	-0.778639	-0.843996	-0.853984	-0.841626	-0.873252	-0.960153	-1.03739	-0.976536	-0.774887	-0.485801	-0.259598	-0.0978421	-0.0334141	-0.0463959	-0.0985035	-0.179932	-0.29941	-0.405913	-0.443246	-0.414946	-0.387711	-0.349488	-0.295177	-0.164383	0.011153	0.266444	0.524466	0.632978	0.579443	0.379461	0.19248	0.133907	0.131458	0.153577	0.138081	0.0754427	-0.0590181	-0.180594	-0.308335	-0.376161	-0.390792	-0.329322	-0.19482	-0.0716039	0.00469568	0.0367674	0.00192742
-0.000978676	0.0473615	0.171859	0.337751	0.587888	0.84099	0.951604	0.897032	0.693177	0.502575	0.442867	0.440371	0.462918	0.447122	0.383271	0.246206	0.122275	-0.00793984	-0.0770803	-0.0919937	-0.0293338	0.107774	0.233376	0.311153	0.343846	0.308331	0.217174	0.104822	-0.0721687	-0.183522	-0.234179	-0.213457	-0.184653	-0.195117	-0.191122	-0.155537	-0.0939669	-0.0316388	-0.00387626	-0.00113106	0.0444866	0.0996668	0.128509	0.0962355	0.0632139	0.0390377	0.0541813	0.0780406	0.0546408	-0.0168804
-0.861954	-0.769733	-0.673931	-0.576201	-0.502098	-0.427855	-0.384827	-0.376792	-0.378526	-0.427538	-0.569996	-0.780216	-1.04087	-1.23077	-1.3577	-1.43643	-1.43684	-1.2788	-1.06579	-0.83709	-0.76424	-0.864784	-1.08595	-1.29169	-1.36301	-1.28171	-1.11855	-0.961913	-0.855252	-0.812308	-0.770399	-0.744262	-0.734134	-0.695582	-0.569897	-0.368902	-0.20856	-0.145738	-0.243945	-0.466337	-0.750294	-1.04444	-1.24849	-1.3345	-1.33477	-1.30594	-1.2933	-1.31603	-1.32236	-1.34801
-0.531573	-0.561733	-0.569698	-0.548595	-0.481579	-0.390427	-0.28092	-0.167414	-0.0534635	0.0854826	0.204339	0.313715	0.308511	0.22289	0.100509	-0.00642327	-0.0386528	0.0159843	0.1487	0.279348	0.363142	0.381617	0.335094	0.239846	0.205405	0.220486	0.272674	0.346126	0.380644	0.364204	0.329212	0.341916	0.406126	0.477529	0.507534	0.376514	0.133179	-0.0851366	-0.147449	-0.119082	-0.0617059	-0.0322025	-0.0925115	-0.163617	-0.141878	-0.00833399	0.20609	0.388868	0.482449	0.400497
-0.574105	-0.371748	-0.162627	0.0363144	0.113017	0.0731479	-0.0200071	-0.0549066	-0.0245212	0.0161841	0.0718211	0.0815519	0.0318749	-0.01255	0.00842216	0.10015	0.200032	0.235548	0.206305	0.157314	0.129644	0.215136	0.3261	0.391865	0.341174	0.190814	0.0373169	-0.087966	-0.144475	-0.101849	0.0348207	0.226524	0.433646	0.556138	0.542667	0.427958	0.264094	0.218206	0.262533	0.337355	0.381049	0.341406	0.284798	0.233157	0.182124	0.0810082	0.0411006	0.0745474	0.243418	0.44764
-1.33968	-1.37902	-1.27097	-0.981011	-0.718245	-0.508698	-0.440049	-0.45937	-0.463127	-0.381306	-0.264346	-0.161331	-0.189915	-0.332635	-0.521158	-0.687819	-0.698116	-0.582555	-0.368535	-0.224748	-0.23099	-0.337963	-0.517565	-0.655642	-0.769701	-0.791111	-0.742888	-0.655648	-0.586234	-0.573627	-0.545394	-0.471512	-0.389918	-0.344536	-0.427579	-0.67208	-0.953526	-1.11879	-1.02604	-0.750576	-0.375862	-0.107432	0.0263973	0.0841769	0.154423	0.244338	0.298687	0.271926	0.153913	-0.0661112
0.116904	0.0565683	-0.0948367	-0.335852	-0.582969	-0.722583	-0.644089	-0.410956	-0.0938232	0.133358	0.246622	0.295523	0.354974	0.431072	0.47707	0.454421	0.354543	0.168329	-0.0218501	-0.113669	-0.0740674	0.00842916	0.0466434	-0.0104561	-0.196514	-0.444297	-0.70008	-0.828713	-0.805349	-0.680174	-0.541687	-0.420213	-0.396959	-0.402468	-0.425854	-0.404095	-0.272198	-0.0978932	0.0759801	0.194116	0.203838	0.0798558	-0.101634	-0.336946	-0.554878	-0.724088	-0.840112	-0.885868	-0.895171	-0.886836
0.393131	0.553332	0.670901	0.709529	0.69537	0.621916	0.538825	0.502358	0.512081	0.498344	0.447889	0.381723	0.320721	0.259791	0.117366	-0.0622066	-0.287632	-0.461402	-0.505504	-0.437157	-0.283854	-0.129767	-0.0177146	-0.0187967	-0.0354589	-0.0656435	-0.0595966	-0.00778729	0.0587256	0.163645	0.169443	0.132213	0.0546722	-0.0419104	-0.134236	-0.202742	-0.231358	-0.241839	-0.201219	-0.144633	-0.0492367	0.0022401	0.0213605	0.0138424	0.00341367	-0.0121329	-0.0347982	-0.108807	-0.197977	-0.335578
0.269156	0.279504	0.32933	0.387048	0.391503	0.349999	0.283802	0.222771	0.161813	0.0193213	-0.160335	-0.385867	-0.559718	-0.60384	-0.535461	-0.382086	-0.227928	-0.115822	-0.116905	-0.133575	-0.163774	-0.157724	-0.105891	-0.0393465	0.0656217	0.0714229	0.0341758	-0.0434018	-0.14003	-0.232399	-0.300936	-0.329566	-0.340052	-0.299413	-0.2428	-0.147359	-0.0958584	-0.0767291	-0.0842507	-0.0946843	-0.110238	-0.132914	-0.206957	-0.296169	-0.433834	-0.601511	-0.790326	-0.941151	-1.01991	-1.0622
-0.450429	-0.371993	-0.288653	-0.249251	-0.239381	-0.254438	-0.265781	-0.282689	-0.307341	-0.387834	-0.484817	-0.634475	-0.816759	-1.02202	-1.18599	-1.27161	-1.31758	-1.29793	-1.16232	-0.915552	-0.628701	-0.41082	-0.332695	-0.362851	-0.493236	-0.6369	-0.761462	-0.824681	-0.798519	-0.735987	-0.695739	-0.75645	-0.83845	-0.903622	-0.894033	-0.890374	-0.915996	-0.921771	-0.83286	-0.618741	-0.359244	-0.203533	-0.212186	-0.349425	-0.512006	-0.608538	-0.704333	-0.797232	-0.851443	-0.80256
1.27591	1.06311	0.78297	0.499445	0.246072	0.132268	0.148728	0.304564	0.519536	0.607688	0.596148	0.467785	0.34983	0.272596	0.262443	0.314167	0.377503	0.326047	0.15285	-0.11481	-0.333894	-0.446498	-0.448172	-0.390914	-0.308314	-0.208874	-0.0771379	0.0852039	0.294196	0.509302	0.650991	0.697384	0.662576	0.534525	0.317808	0.0602534	-0.10822	-0.241643	-0.245357	-0.196559	-0.109248	-0.0388751	-0.0180706	0.0233179	0.142847	0.342102	0.560856	0.755169	0.804917	0.815151
-0.138427	-0.0838355	-0.0643152	-0.0753958	-0.050458	0.0580153	0.251498	0.463916	0.6526	0.700907	0.710845	0.681853	0.621572	0.563518	0.479054	0.37353	0.331137	0.349821	0.441693	0.518218	0.542532	0.440579	0.249181	0.0519037	-0.110042	-0.191079	-0.225706	-0.217359	-0.208389	-0.202648	-0.193402	-0.242394	-0.288457	-0.239118	-0.0853977	0.117316	0.281183	0.334644	0.335193	0.289061	0.262464	0.294229	0.274199	0.163058	-0.0172754	-0.250298	-0.359427	-0.336751	-0.161871	0.112893
0.0201487	0.0562342	0.148539	0.350127	0.576086	0.754111	0.806563	0.762994	0.675418	0.486287	0.292616	0.163917	0.224986	0.4424	0.724519	0.911475	0.986842	0.924358	0.8718	0.87806	0.883866	0.92697	0.936286	0.882927	0.749741	0.627442	0.486173	0.457898	0.494991	0.581319	0.639101	0.567611	0.38874	0.196433	-0.0315412	-0.223248	-0.365526	-0.48317	-0.563572	-0.652427	-0.701388	-0.734562	-0.718513	-0.594498	-0.39831	-0.189636	-0.0142645	0.0530633	-0.00874764	-0.176078
-1.12338	-1.03896	-0.872978	-0.68204	-0.486551	-0.326703	-0.264702	-0.321622	-0.475714	-0.675842	-0.861161	-0.951022	-0.932063	-0.854299	-0.787813	-0.689041	-0.567892	-0.412339	-0.213767	-0.0461352	0.0420525	0.0227865	-0.0790103	-0.236179	-0.337243	-0.404876	-0.48885	-0.677593	-0.92908	-1.23686	-1.52414	-1.72759	-1.80632	-1.80074	-1.70701	-1.57284	-1.38652	-1.18937	-1.05426	-0.980793	-1.03236	-1.14114	-1.19593	-1.14302	-1.03677	-0.946271	-0.925818	-0.920778	-0.929517	-0.881281
-0.0885751	-0.120052	-0.126684	-0.165096	-0.267276	-0.440018	-0.644016	-0.832919	-0.924518	-0.905192	-0.825924	-0.758152	-0.65747	-0.533979	-0.375418	-0.173006	-0.00213229	0.0877607	0.0681221	-0.0356432	-0.195851	-0.298869	-0.36781	-0.453408	-0.645801	-0.902151	-1.21588	-1.50872	-1.71611	-1.79635	-1.79067	-1.69512	-1.55836	-1.36844	-1.16747	-1.02976	-0.954864	-1.00743	-1.11831	-1.17416	-1.12023	-1.01193	-0.919675	-0.898825	-0.893688	-0.902597	-0.853428	-0.801706	-0.775616	-0.784518
0.824894	0.827108	0.815788	0.767586	0.641027	0.415826	0.131994	-0.127644	-0.302112	-0.41074	-0.466919	-0.482108	-0.434983	-0.370843	-0.331066	-0.417581	-0.506357	-0.551675	-0.557213	-0.493537	-0.40967	-0.359668	-0.35588	-0.329388	-0.289096	-0.221749	-0.146764	-0.101087	-0.089002	-0.121155	-0.2189	-0.307007	-0.389734	-0.401816	-0.37713	-0.245841	-0.0711343	0.111735	0.230469	0.314953	0.437571	0.556769	0.642351	0.641019	0.632315	0.534152	0.342221	0.0847853	-0.191847	-0.440017
-0.0660718	-0.117757	-0.157712	-0.211325	-0.203591	-0.174481	-0.0399835	0.138993	0.326333	0.447968	0.534517	0.660133	0.782244	0.869919	0.868554	0.859637	0.759074	0.562452	0.298724	0.0153303	-0.238906	-0.46664	-0.569936	-0.554836	-0.468077	-0.387561	-0.297262	-0.191405	-0.0317377	0.158164	0.368534	0.562347	0.707838	0.753254	0.671832	0.480176	0.213662	0.0438613	0.0271213	0.0977925	0.225732	0.311739	0.410413	0.517658	0.673152	0.849599	0.998271	1.1193	1.16819	1.18169
0.475142	0.340337	0.249024	0.225867	0.320801	0.394941	0.386898	0.328241	0.216255	0.140778	0.0802735	0.0626493	0.0635485	0.0719223	0.076272	0.0755049	0.0857236	0.035018	-0.0290263	-0.101573	-0.157162	-0.204214	-0.153822	0.0145565	0.301165	0.616183	0.824529	0.850763	0.693094	0.552111	0.536133	0.699823	0.936007	1.13202	1.15199	1.03511	0.866	0.710808	0.623206	0.55404	0.455964	0.385158	0.400228	0.584229	0.878409	1.20192	1.45168	1.55902	1.55437	1.53928
0.948818	0.577618	0.225378	-0.0992449	-0.359144	-0.544463	-0.650885	-0.689636	-0.704925	-0.703827	-0.69735	-0.710302	-0.783837	-0.867017	-0.974246	-1.07664	-1.23743	-1.4101	-1.5635	-1.59655	-1.45768	-1.2187	-0.966754	-0.818692	-0.764753	-0.865609	-1.05392	-1.27179	-1.41401	-1.47671	-1.42556	-1.2389	-1.00872	-0.771727	-0.652129	-0.659914	-0.787173	-0.974409	-1.13463	-1.22217	-1.25607	-1.27454	-1.21162	-1.13014	-0.981807	-0.806784	-0.635675	-0.500395	-0.470952	-0.573243
-1.16643	-1.21758	-1.23189	-1.2234	-1.1464	-0.967205	-0.754879	-0.536272	-0.425951	-0.433132	-0.55052	-0.723232	-0.871025	-0.951774	-0.983045	-1.00008	-0.942039	-0.866885	-0.730057	-0.568609	-0.410773	-0.285986	-0.258827	-0.353183	-0.510835	-0.657202	-0.731571	-0.716878	-0.663349	-0.583016	-0.522459	-0.507753	-0.544094	-0.51952	-0.361544	-0.100292	0.193704	0.408539	0.497681	0.426009	0.253165	0.0710593	-0.0294489	-0.069953	-0.102726	-0.167401	-0.205572	-0.190781	-0.111696	-0.0176586
1.44276	1.5327	1.58209	1.56287	1.41299	1.1735	0.935796	0.804602	0.751732	0.708954	0.624533	0.574708	0.594015	0.697245	0.819992	0.878384	0.815001	0.712206	0.584476	0.511148	0.469882	0.419797	0.42495	0.395525	0.273872	0.0527308	-0.156682	-0.231819	-0.12522	0.0602351	0.207583	0.299485	0.353156	0.472749	0.642328	0.862042	1.0595	1.14994	1.2037	1.31806	1.39925	1.37352	1.22232	0.978912	0.718298	0.464389	0.323733	0.238706	0.213492	0.209858
-0.547816	-0.573064	-0.603267	-0.559959	-0.54443	-0.520477	-0.552199	-0.569543	-0.493553	-0.300352	-0.079399	0.0644637	0.133674	0.181663	0.206437	0.24853	0.24129	0.164291	0.0131627	-0.115876	-0.241332	-0.331266	-0.361773	-0.351287	-0.314802	-0.278557	-0.286041	-0.335466	-0.442489	-0.510072	-0.428183	-0.19049	0.11689	0.345515	0.413381	0.314013	0.108724	-0.106436	-0.300461	-0.389999	-0.356294	-0.200382	0.00309692	0.137544	0.199955	0.263648	0.358699	0.373151	0.338004	0.181501
-0.408476	-0.29872	-0.260418	-0.275119	-0.360669	-0.411779	-0.334226	-0.109118	0.181986	0.398505	0.462778	0.368671	0.174252	-0.0295154	-0.213266	-0.298063	-0.266143	-0.118487	0.0742181	0.201546	0.260653	0.320973	0.410991	0.424678	0.391392	0.243176	0.0316999	-0.24741	-0.563963	-0.814177	-0.895028	-0.794157	-0.624405	-0.442857	-0.345249	-0.317871	-0.260135	-0.0986088	0.160903	0.373716	0.413854	0.208333	-0.150117	-0.537276	-0.780469	-0.835175	-0.680286	-0.369777	-0.0272004	0.260962
-0.796515	-0.87936	-0.887675	-0.817023	-0.614009	-0.299684	0.0354755	0.317399	0.452641	0.466138	0.395567	0.316972	0.22243	0.152803	0.0217529	-0.107041	-0.281275	-0.362533	-0.359955	-0.286714	-0.183828	-0.0703173	0.105409	0.304937	0.467369	0.507999	0.541021	0.555845	0.589841	0.53957	0.296499	-0.0377621	-0.358554	-0.51794	-0.509844	-0.36904	-0.239376	-0.109996	0.0318364	0.251772	0.546549	0.840402	1.05478	1.06824	0.934875	0.686453	0.429695	0.285003	0.282381	0.367821
-0.0121083	-0.293475	-0.501939	-0.574717	-0.528209	-0.385775	-0.264986	-0.144463	-0.0123392	0.192541	0.46714	0.740879	0.940583	0.953118	0.828884	0.597467	0.358285	0.223498	0.221055	0.300646	0.354524	0.318805	0.240885	0.156632	0.108498	0.126363	0.140101	0.157591	0.134949	0.115346	0.14444	0.243657	0.333785	0.377571	0.323953	0.20123	0.0960753	0.0233316	0.0856927	0.27708	0.506314	0.656467	0.655032	0.489474	0.324881	0.221987	0.20082	0.238081	0.269683	0.237383
0.490282	0.575485	0.622346	0.699679	0.7497	0.797121	0.816936	0.772637	0.652552	0.478689	0.27499	0.116546	0.050496	0.0521976	0.109945	0.187196	0.270841	0.379798	0.550365	0.683001	0.795812	0.872804	0.875151	0.837068	0.780674	0.74507	0.711911	0.704856	0.799812	0.892145	0.871703	0.691666	0.414378	0.0630816	-0.271243	-0.499514	-0.666346	-0.746379	-0.710918	-0.575804	-0.401999	-0.23918	-0.0969666	-0.0253749	-0.0399324	-0.10563	-0.133202	-0.113953	-0.0572007	-0.0237268
-0.407758	-0.327184	-0.21206	-0.117643	-0.093236	-0.165617	-0.273741	-0.426253	-0.509925	-0.528302	-0.481792	-0.332686	-0.185828	-0.0237512	0.0287255	0.0351984	0.03184	0.0849696	0.139363	0.211681	0.266708	0.254902	0.169221	-0.000532751	-0.125608	-0.202911	-0.150133	-0.0217871	0.0747023	0.0763168	-0.0122188	-0.132402	-0.204948	-0.193387	-0.0356079	0.220754	0.478419	0.675637	0.706914	0.531326	0.19267	-0.192198	-0.487449	-0.612476	-0.556826	-0.396675	-0.242631	-0.155016	-0.19446	-0.29481
-1.09698	-0.953235	-0.757491	-0.481271	-0.16675	0.0271225	0.100866	0.0631107	-0.00530606	-0.032827	-0.0824327	-0.138891	-0.215054	-0.34584	-0.457996	-0.516662	-0.515083	-0.381079	-0.126752	0.189078	0.484747	0.723839	0.883377	0.94118	0.862329	0.675378	0.408785	0.142994	0.017071	0.0712317	0.236675	0.400043	0.526207	0.594803	0.588507	0.490245	0.327721	0.0913361	-0.107459	-0.228453	-0.265013	-0.200705	-0.0668889	0.0271976	0.0895328	0.120948	0.131915	0.168404	0.238781	0.339207
0.619864	0.623341	0.580747	0.476313	0.321626	0.0977552	-0.0898011	-0.203955	-0.238448	-0.177776	-0.0515246	0.0372428	0.0960539	0.125693	0.13604	0.170467	0.236865	0.331613	0.420154	0.438922	0.39674	0.344437	0.276577	0.240617	0.204051	0.130174	0.00871339	-0.0951731	-0.163784	-0.171461	-0.137376	-0.123724	-0.185189	-0.250909	-0.315603	-0.322363	-0.293281	-0.180542	-0.0429046	0.0768831	0.158624	0.165565	0.0790003	-0.0852817	-0.252344	-0.370735	-0.393654	-0.360668	-0.271113	-0.1721
-0.42764	-0.348882	-0.28381	-0.147105	0.0778282	0.335817	0.603111	0.76922	0.838188	0.774587	0.561651	0.278382	0.0165536	-0.0989146	-0.17391	-0.202031	-0.201289	-0.172122	-0.165904	-0.163166	-0.187341	-0.209876	-0.182784	-0.0478236	0.123529	0.274105	0.387769	0.414134	0.342223	0.240145	0.165774	0.247337	0.459027	0.662341	0.72092	0.591391	0.363641	0.192368	0.122325	0.0731615	0.0539101	0.0877352	0.194913	0.404204	0.628635	0.778216	0.799866	0.674636	0.42317	0.0742092
-0.38575	-0.267748	-0.167887	-0.107529	-0.109814	-0.20118	-0.338304	-0.474151	-0.549017	-0.490551	-0.382102	-0.282062	-0.178398	-0.0632059	0.0532394	-0.00900549	-0.152884	-0.310691	-0.40648	-0.329242	-0.0933426	0.194241	0.399192	0.449912	0.343156	0.215987	0.145084	0.14964	0.219305	0.228159	0.167553	0.082857	0.00533936	-0.105716	-0.20333	-0.297917	-0.374696	-0.414349	-0.381784	-0.300341	-0.294424	-0.406647	-0.484075	-0.46059	-0.324366	-0.108847	0.139487	0.29985	0.339239	0.265938
0.158699	0.257398	0.293213	0.287943	0.241369	0.232303	0.246	0.286742	0.281432	0.286882	0.265609	0.271878	0.349002	0.511964	0.644103	0.721801	0.747784	0.738164	0.753876	0.803988	0.841749	0.80239	0.732502	0.67368	0.648945	0.714919	0.882258	1.14814	1.43082	1.63068	1.69368	1.62371	1.47137	1.28413	1.0659	0.847029	0.637367	0.37937	0.176195	0.0513406	0.0121137	0.0130531	0.012623	0.0102175	-0.0386554	-0.139119	-0.283415	-0.395058	-0.435029	-0.388117
-0.0267159	0.0671405	0.216057	0.430084	0.582603	0.673847	0.702544	0.691919	0.709272	0.764618	0.806323	0.762853	0.685666	0.6207	0.593383	0.666246	0.851063	1.14471	1.45691	1.67765	1.74723	1.66995	1.5017	1.2949	1.05388	0.812154	0.580595	0.295653	0.0712573	-0.0666364	-0.10996	-0.108923	-0.109398	-0.112055	-0.166032	-0.276988	-0.436355	-0.559657	-0.603803	-0.551992	-0.39299	-0.123454	0.163474	0.351375	0.364898	0.242789	0.0143783	-0.206168	-0.262732	-0.122358
0.153353	0.00902768	-0.203784	-0.370095	-0.476233	-0.509769	-0.508835	-0.509263	-0.511655	-0.560247	-0.660134	-0.803602	-0.914603	-0.954345	-0.907702	-0.764563	-0.521917	-0.263614	-0.0944585	-0.0822841	-0.192211	-0.397835	-0.596379	-0.6473	-0.52093	-0.303682	-0.072546	0.174008	0.343589	0.408478	0.354919	0.217901	0.0229926	-0.167901	-0.256841	-0.224532	-0.0479053	0.130856	0.214143	0.0804086	-0.204403	-0.521098	-0.774647	-0.928119	-1.01223	-0.992058	-0.843865	-0.577637	-0.315298	-0.190897
0.775903	0.717747	0.62409	0.492227	0.319078	0.109383	-0.0842179	-0.174419	-0.141652	0.0374798	0.218777	0.303245	0.167613	-0.121237	-0.442424	-0.699569	-0.855217	-0.940518	-0.920063	-0.769768	-0.499764	-0.233705	-0.10754	-0.121627	-0.172784	-0.168423	-0.11454	-0.0844556	-0.205942	-0.405916	-0.625039	-0.761766	-0.76322	-0.716977	-0.633615	-0.591808	-0.550709	-0.472455	-0.349306	-0.219596	-0.14863	-0.161078	-0.281376	-0.489975	-0.780111	-1.01965	-1.16228	-1.1224	-0.908157	-0.644523
0.171678	0.21219	0.240772	0.215739	0.11813	-0.0596767	-0.229083	-0.348996	-0.41009	-0.461656	-0.475915	-0.481225	-0.495275	-0.423568	-0.327327	-0.275647	-0.320117	-0.421905	-0.540414	-0.534951	-0.435518	-0.305417	-0.233764	-0.230311	-0.290803	-0.335528	-0.337261	-0.327945	-0.240111	-0.0732642	0.134464	0.324457	0.420239	0.422449	0.368915	0.294181	0.273798	0.308109	0.380835	0.374973	0.28474	0.0728443	-0.207555	-0.470216	-0.733438	-0.950156	-1.11403	-1.07806	-0.953025	-0.665683
0.432403	0.436726	0.495205	0.572444	0.673156	0.671435	0.568619	0.327174	0.00767306	-0.291616	-0.591545	-0.838485	-1.02521	-0.984226	-0.841754	-0.514342	-0.238627	-0.031096	-0.0248285	-0.145719	-0.311256	-0.360868	-0.310976	-0.231887	-0.173813	-0.230991	-0.312383	-0.34315	-0.25939	-0.111652	0.0594961	0.195413	0.314664	0.392493	0.404258	0.336788	0.261925	0.249644	0.312704	0.405843	0.498835	0.621313	0.723365	0.800781	0.810514	0.696897	0.54417	0.353218	0.209248	0.154194
-0.175214	-0.181661	-0.196174	-0.2718	-0.348022	-0.369867	-0.357922	-0.356954	-0.415667	-0.549759	-0.689824	-0.778962	-0.751201	-0.603498	-0.363687	-0.124888	0.0805508	0.212797	0.290916	0.331051	0.393116	0.47849	0.572666	0.636025	0.622069	0.488266	0.305413	0.101587	-0.0414768	-0.103605	-0.117003	-0.117534	-0.130795	-0.145591	-0.164499	-0.1918	-0.253918	-0.331275	-0.380853	-0.387336	-0.342225	-0.226445	-0.106564	0.0256411	0.0993881	0.118311	0.122951	0.132317	0.171858	0.26757
-0.345546	-0.282706	-0.23495	-0.218883	-0.234116	-0.25473	-0.280121	-0.316785	-0.400207	-0.504092	-0.570672	-0.579379	-0.518798	-0.363312	-0.202319	-0.0247751	0.0742628	0.0996745	0.105906	0.118484	0.171586	0.300121	0.415431	0.446549	0.394791	0.222095	-0.0260192	-0.298994	-0.532282	-0.715465	-0.763402	-0.706311	-0.5898	-0.551969	-0.651765	-0.807566	-0.8435	-0.737745	-0.387963	0.0520565	0.423637	0.680187	0.798975	0.835562	0.855497	0.817762	0.669831	0.455855	0.284426	0.211897
0.194545	0.402895	0.542956	0.580813	0.523109	0.348133	0.0875815	-0.199076	-0.444058	-0.636423	-0.686763	-0.626809	-0.504459	-0.464732	-0.569529	-0.73314	-0.770875	-0.65982	-0.292504	0.169571	0.559776	0.829186	0.953929	0.99235	1.01328	0.973658	0.818311	0.59361	0.413588	0.337424	0.432338	0.541262	0.597645	0.543549	0.480328	0.446629	0.392688	0.338973	0.295797	0.312329	0.277193	0.257015	0.230284	0.304926	0.477115	0.654148	0.740823	0.556343	0.17546	-0.211181
-0.776898	-0.523509	-0.106905	0.331704	0.696157	0.947872	1.07342	1.11209	1.13316	1.09327	0.936927	0.710778	0.529596	0.452941	0.548466	0.658093	0.714839	0.660394	0.596766	0.56285	0.508561	0.4545	0.411046	0.427685	0.392322	0.372014	0.34511	0.420234	0.593532	0.771706	0.85894	0.67327	0.289933	-0.0991989	-0.314266	-0.364396	-0.345346	-0.332769	-0.335508	-0.370544	-0.456416	-0.54729	-0.681381	-0.797136	-0.813666	-0.703071	-0.435329	-0.186465	-0.152113	-0.379486
0.167698	0.125142	0.186243	0.333813	0.482151	0.551814	0.391647	0.0609621	-0.274721	-0.460248	-0.503493	-0.487059	-0.47621	-0.478573	-0.508796	-0.582874	-0.661266	-0.776939	-0.876794	-0.891054	-0.79565	-0.564683	-0.350002	-0.320368	-0.51651	-0.751018	-0.89998	-0.866828	-0.774091	-0.730658	-0.760362	-0.867736	-0.959322	-0.984129	-0.978782	-0.932837	-0.89461	-0.80671	-0.757159	-0.734761	-0.748134	-0.741411	-0.764317	-0.735702	-0.700429	-0.640137	-0.552556	-0.432769	-0.249512	-0.0346419
-1.15574	-1.05286	-0.928057	-0.755195	-0.611838	-0.553036	-0.577849	-0.667542	-0.744047	-0.764769	-0.760302	-0.721923	-0.689991	-0.616565	-0.575173	-0.556464	-0.567635	-0.562019	-0.581153	-0.55725	-0.527785	-0.477422	-0.404262	-0.3042	-0.151121	0.0283671	0.227359	0.404199	0.462304	0.449234	0.389112	0.30659	0.235313	0.180413	0.126259	0.055952	-0.00500131	-0.106489	-0.175578	-0.209175	-0.172885	-0.0793679	0.0760152	0.293881	0.48985	0.644786	0.75762	0.729662	0.640233	0.562299
-0.508284	-0.445311	-0.435928	-0.438521	-0.458051	-0.458946	-0.47747	-0.45433	-0.425805	-0.377048	-0.306222	-0.209353	-0.0611561	0.112606	0.305249	0.476448	0.532699	0.520047	0.461843	0.381953	0.31295	0.259801	0.207375	0.139311	0.0803019	-0.0179482	-0.0848336	-0.117359	-0.0822262	0.00830765	0.158734	0.36965	0.559367	0.70936	0.818595	0.791529	0.704952	0.629505	0.591894	0.536214	0.484583	0.466936	0.497214	0.538158	0.550876	0.561108	0.580624	0.558055	0.558651	0.612286
0.036869	-0.0239743	-0.129785	-0.228119	-0.315214	-0.391446	-0.481398	-0.572402	-0.707847	-0.800686	-0.875511	-0.906295	-0.85913	-0.777502	-0.717255	-0.706308	-0.73397	-0.692414	-0.501577	-0.221403	0.00727568	0.159862	0.192666	0.139129	0.0170299	-0.15805	-0.326787	-0.486562	-0.574935	-0.596033	-0.541224	-0.483625	-0.4693	-0.514057	-0.60054	-0.642214	-0.596327	-0.460059	-0.275441	-0.0804372	0.0410263	0.12023	0.182103	0.184698	0.144078	0.0609764	0.0366858	0.0289249	0.102245	0.228934
0.119665	0.210371	0.328831	0.399731	0.517667	0.669586	0.838342	0.921925	0.833895	0.653079	0.532197	0.552475	0.65926	0.846418	0.993466	1.12791	1.23254	1.35116	1.41408	1.38548	1.30743	1.31508	1.35366	1.38328	1.37584	1.22958	1.06112	0.933279	0.852524	0.920178	0.977306	0.946685	0.79355	0.550407	0.285593	0.122225	-0.00438518	-0.0757157	-0.0990278	-0.117178	-0.128137	-0.122764	-0.0796558	0.00168886	0.117318	0.206555	0.313259	0.370285	0.428119	0.489276
0.796015	0.797379	0.888399	0.968121	1.02081	1.02019	0.88486	0.729012	0.610731	0.536019	0.598611	0.651465	0.623135	0.481457	0.256505	0.0115045	-0.139641	-0.256778	-0.322772	-0.34434	-0.361132	-0.371271	-0.366301	-0.326417	-0.251159	-0.144181	-0.0616205	0.0371003	0.08986	0.143367	0.199948	0.235933	0.239877	0.159752	0.0269136	-0.129124	-0.262506	-0.336411	-0.334185	-0.370537	-0.433025	-0.525962	-0.584902	-0.557924	-0.44186	-0.257954	-0.0735535	0.0932993	0.228149	0.345646
-0.963932	-0.741763	-0.51341	-0.313251	-0.171542	-0.0977187	-0.0392177	0.0511904	0.191795	0.336131	0.320654	0.141686	-0.154806	-0.458227	-0.58915	-0.554614	-0.39698	-0.179082	-0.032738	0.0320204	0.023278	0.0421829	0.136974	0.261592	0.302292	0.167809	-0.101716	-0.434264	-0.697257	-0.796115	-0.678166	-0.449991	-0.2116	-0.121168	-0.142213	-0.177029	-0.227252	-0.302036	-0.432965	-0.614418	-0.791716	-0.88222	-0.839779	-0.706793	-0.604363	-0.539467	-0.496406	-0.492247	-0.494976	-0.53508
0.17076	0.0830528	0.0671394	0.151745	0.283953	0.442686	0.574923	0.647636	0.673213	0.725269	0.732529	0.610433	0.421822	0.296609	0.306867	0.455794	0.724257	0.897457	0.846247	0.572784	0.234701	-0.0448222	-0.180064	-0.219128	-0.142434	-0.0245447	0.0911642	0.258764	0.404599	0.497324	0.486279	0.360721	0.213282	0.126441	0.140504	0.30812	0.543192	0.737301	0.867868	0.909463	0.909443	0.919468	0.968054	1.01339	1.00009	0.936513	0.896417	0.9019	0.861781	0.811443
0.46463	0.397825	0.257255	0.0690434	-0.161385	-0.434361	-0.65256	-0.756168	-0.678492	-0.518878	-0.336594	-0.338773	-0.46521	-0.600731	-0.572025	-0.361385	-0.110462	0.0492004	0.105436	0.09254	0.138036	0.2943	0.451254	0.498716	0.449416	0.268701	0.0759877	-0.088573	-0.218606	-0.25653	-0.273789	-0.20748	-0.16866	-0.179573	-0.287854	-0.400016	-0.458377	-0.350018	-0.125472	0.127812	0.267855	0.237534	0.0300373	-0.301345	-0.628421	-0.918672	-1.08274	-1.05225	-0.924892	-0.772159
-0.142412	-0.113033	-0.0387615	0.0787955	0.18138	0.211898	0.208954	0.145881	0.0594131	0.0211632	-0.0247043	-0.0199072	0.0215994	0.122759	0.21535	0.265484	0.256134	0.149919	-0.00603291	-0.152739	-0.222714	-0.24479	-0.233367	-0.25059	-0.339224	-0.401889	-0.339503	-0.161096	0.113171	0.336562	0.445799	0.380884	0.228876	0.0830101	0.00889832	0.0108524	0.00192983	0.00753774	0.048636	0.20042	0.462589	0.724881	0.908539	0.958686	0.878119	0.638337	0.346171	4.58142e-06	-0.326067	-0.567111
0.987547	1.09479	1.15731	1.12881	1.00293	0.728448	0.399076	0.0088268	-0.358768	-0.630508	-0.788697	-0.706015	-0.494791	-0.25387	-0.0771171	0.0408396	0.113839	0.199254	0.27474	0.232119	0.0279761	-0.349045	-0.655077	-0.800623	-0.655668	-0.321559	0.100789	0.428241	0.576998	0.555462	0.439785	0.321992	0.28797	0.295168	0.309252	0.226926	0.0966438	-0.0424265	-0.0873751	-0.0342597	0.0382059	0.01975	-0.0894518	-0.236365	-0.313145	-0.287627	-0.15279	0.0140781	0.273	0.529844
0.150103	0.0565121	0.0128249	0.0153797	0.0689196	0.136612	0.0953351	-0.102374	-0.467511	-0.763897	-0.904855	-0.76447	-0.440892	-0.0318561	0.285275	0.429343	0.408486	0.296455	0.182374	0.149425	0.156396	0.170037	0.0903051	-0.0358705	-0.170557	-0.214089	-0.162648	-0.0924664	-0.110341	-0.2161	-0.358383	-0.432743	-0.408029	-0.277442	-0.115834	0.134928	0.383675	0.490952	0.473366	0.329571	0.123955	0.0184719	0.0549218	0.136474	0.236509	0.295799	0.299772	0.295065	0.244447	0.123114
-0.53824	-0.336053	-0.114203	0.0577816	0.239973	0.399453	0.552079	0.665563	0.631865	0.483508	0.252263	0.106616	0.140705	0.316823	0.51991	0.605112	0.570775	0.487321	0.484551	0.577674	0.719414	0.801027	0.783079	0.737902	0.694775	0.703056	0.68037	0.567086	0.414464	0.28391	0.29735	0.450608	0.646004	0.783761	0.846302	0.803385	0.738264	0.593634	0.407868	0.216642	0.121441	0.139752	0.234739	0.396228	0.562422	0.723767	0.803256	0.791831	0.720916	0.54291
-0.354851	-0.21998	-0.00409208	0.244121	0.470527	0.554992	0.521697	0.440775	0.438089	0.528387	0.665827	0.744963	0.72756	0.683754	0.641935	0.649965	0.627968	0.51812	0.370129	0.243536	0.256567	0.405176	0.594644	0.728222	0.788865	0.74725	0.684105	0.543862	0.363733	0.178308	0.0859958	0.103751	0.195856	0.352446	0.513598	0.670048	0.747125	0.736047	0.667283	0.494678	0.168632	-0.163476	-0.371046	-0.369944	-0.212795	-0.0319846	0.045338	-0.0107272	-0.145262	-0.163938
0.43368	0.555766	0.654662	0.691546	0.65034	0.596582	0.556583	0.564263	0.543223	0.438156	0.296605	0.175521	0.187986	0.330127	0.51135	0.639115	0.697119	0.657315	0.596918	0.462778	0.290488	0.113132	0.024837	0.0418197	0.129916	0.279692	0.433831	0.583472	0.657195	0.646599	0.580828	0.415734	0.103877	-0.213778	-0.412315	-0.411261	-0.260951	-0.0880091	-0.0140515	-0.0676768	-0.196357	-0.214221	-0.070463	0.144873	0.313601	0.374669	0.324096	0.254914	0.22217	0.226654
0.773925	0.655322	0.591277	0.560378	0.576097	0.562065	0.454761	0.310197	0.186536	0.199265	0.344433	0.529513	0.659997	0.719236	0.678585	0.616902	0.479907	0.303949	0.122819	0.0326439	0.0499881	0.13996	0.292924	0.450344	0.603171	0.678462	0.667641	0.600469	0.431862	0.113366	-0.21105	-0.413814	-0.412737	-0.259228	-0.0826043	-0.0070724	-0.0618392	-0.193258	-0.211502	-0.0646847	0.155235	0.327554	0.389923	0.338273	0.267618	0.234177	0.238757	0.275772	0.295937	0.323896
0.236025	-0.200214	-0.538274	-0.723858	-0.70374	-0.538156	-0.353243	-0.274165	-0.331503	-0.469091	-0.488191	-0.334482	-0.104239	0.0761684	0.141464	0.0873905	0.0134188	-0.0215921	-0.0167971	0.0219556	0.0430667	0.0723386	0.137492	0.234904	0.252733	0.147448	-0.0338382	-0.19992	-0.252711	-0.180442	-0.0312885	0.0856298	0.175294	0.204174	0.21003	0.18953	0.161258	0.100967	1.93816e-05	-0.0463858	-0.0325772	0.0445154	0.0970666	0.0474986	-0.114814	-0.321876	-0.480809	-0.546308	-0.511404	-0.381694
0.477367	0.365932	0.244814	0.100532	-0.00251345	-0.0427123	-0.0380484	-0.000354896	0.0201791	0.048651	0.112024	0.206773	0.224115	0.121708	-0.0546238	-0.216166	-0.267514	-0.197221	-0.0521438	0.0615789	0.148792	0.176883	0.182579	0.16264	0.13514	0.0764966	-0.0216916	-0.0668284	-0.0533972	0.0215882	0.0727031	0.0244899	-0.133386	-0.334789	-0.489378	-0.553087	-0.519137	-0.392971	-0.188139	0.0473792	0.227968	0.270186	0.186122	0.00289214	-0.147074	-0.203357	-0.17387	-0.0570447	0.0964335	0.205329
0.159202	0.124651	0.0727786	0.0280566	0.000266013	-0.0156281	0.0129633	0.0749575	0.166477	0.247236	0.299852	0.263293	0.171624	0.133544	0.172681	0.285584	0.322795	0.271677	0.150378	-0.0575813	-0.258633	-0.410266	-0.489664	-0.609251	-0.706245	-0.787896	-0.829552	-0.783439	-0.732719	-0.6606	-0.550865	-0.469372	-0.432091	-0.41482	-0.354908	-0.226441	-0.0710622	0.0860844	0.174881	0.128482	0.0900232	0.0214784	-0.0391208	-0.114929	-0.161715	-0.163464	-0.0414765	0.183569	0.477923	0.767272
0.0339662	0.150796	0.191923	0.201505	0.157322	0.124061	0.122256	0.248204	0.480557	0.784469	1.08321	1.23962	1.2725	1.12832	0.891293	0.676537	0.507483	0.422442	0.407426	0.381438	0.367934	0.299919	0.154581	-0.044253	-0.191364	-0.211769	-0.0896514	0.126433	0.366423	0.519291	0.562205	0.499399	0.495697	0.51962	0.575152	0.661907	0.743493	0.786739	0.800534	0.748941	0.611598	0.386401	0.175677	0.0588228	0.0225463	-9.16115e-05	-0.00959361	-0.0053882	-0.00509756	-0.038403
0.102456	0.0504915	0.0493884	0.0779371	0.214469	0.450927	0.746535	1.03712	1.18925	1.22123	1.08099	0.850441	0.641552	0.477117	0.3944	0.379794	0.354516	0.341381	0.275224	0.133857	-0.0595451	-0.202637	-0.222484	-0.103703	0.106477	0.339911	0.488603	0.530344	0.469254	0.465653	0.488922	0.542937	0.627322	0.70668	0.748744	0.762162	0.711978	0.578388	0.359343	0.154376	0.0407146	0.00542919	-0.0165902	-0.0258326	-0.0217421	-0.0214594	-0.0538549	-0.055334	0.0468266	0.188535
-0.872317	-0.739225	-0.57006	-0.367305	-0.131872	0.0974356	0.236938	0.2761	0.218785	0.215407	0.237238	0.287915	0.367085	0.441538	0.481002	0.493592	0.446509	0.321174	0.115667	-0.0766324	-0.18327	-0.216375	-0.237033	-0.245704	-0.241867	-0.241601	-0.271995	-0.273383	-0.177536	-0.0445849	0.0763145	0.196686	0.2619	0.281101	0.241114	0.223154	0.238265	0.267945	0.272019	0.2697	0.299498	0.363151	0.446487	0.494861	0.473628	0.487436	0.537721	0.664242	0.815233	0.956347
-0.470018	-0.478039	-0.386512	-0.217257	0.0116591	0.208512	0.275821	0.242267	0.212948	0.265639	0.309322	0.320968	0.22701	0.0426633	-0.242457	-0.508126	-0.730447	-0.885655	-0.938242	-0.885642	-0.766764	-0.639797	-0.558142	-0.574034	-0.670239	-0.804841	-0.894197	-0.850868	-0.729223	-0.603525	-0.548207	-0.58628	-0.662981	-0.659619	-0.56178	-0.42046	-0.347889	-0.348377	-0.383074	-0.44406	-0.536768	-0.586724	-0.540693	-0.417989	-0.261186	-0.110405	-0.00248441	0.0675149	0.0623783	0.0375997
-0.273701	-0.494089	-0.665224	-0.822996	-0.946242	-0.986066	-0.933091	-0.813365	-0.685493	-0.603255	-0.61926	-0.716151	-0.851714	-0.941707	-0.898069	-0.775556	-0.648962	-0.593248	-0.631593	-0.708842	-0.705456	-0.606918	-0.46459	-0.391501	-0.391993	-0.426937	-0.488359	-0.581728	-0.632041	-0.585681	-0.462102	-0.30418	-0.152324	-0.0436329	0.0268658	0.0216925	-0.00326283	-0.0204322	-0.0511904	-0.0669588	-0.12109	-0.21872	-0.403603	-0.59252	-0.754479	-0.745935	-0.632765	-0.382783	-0.136847	0.103579
0.391854	0.591367	0.731117	0.767847	0.709553	0.61508	0.527188	0.394572	0.237083	0.0900678	0.0219854	0.037072	0.144126	0.332216	0.459214	0.434583	0.290454	0.136459	0.0705582	0.153036	0.392341	0.71585	0.984808	1.13862	1.1428	1.06622	1.00322	0.960976	0.963798	0.985402	0.976877	0.968754	0.974908	0.99198	1.03694	1.13272	1.20776	1.30699	1.38189	1.43546	1.4449	1.36767	1.22894	1.06201	0.92192	0.818314	0.80849	0.875049	1.013	1.12152
-0.210659	-0.355324	-0.457913	-0.4794	-0.394627	-0.21113	0.0446701	0.263339	0.341219	0.302528	0.16325	-0.0122897	-0.199692	-0.381541	-0.510864	-0.531262	-0.476242	-0.380508	-0.232018	-0.0504366	0.0580117	0.0838442	-0.000616245	-0.134577	-0.230288	-0.258974	-0.16462	0.00502723	0.14381	0.293289	0.436046	0.601496	0.776703	0.94457	1.1093	1.21021	1.1858	1.04852	0.860711	0.678665	0.579661	0.561898	0.621393	0.72291	0.787595	0.789141	0.715829	0.619291	0.492178	0.358871
-0.0171796	0.0167552	0.0967114	0.212039	0.310546	0.38435	0.434765	0.463405	0.499089	0.552595	0.524007	0.444766	0.298464	0.241332	0.305096	0.506532	0.725638	0.855836	0.820997	0.66021	0.419635	0.197065	0.0869649	0.0913008	0.194428	0.212691	0.0726721	-0.223302	-0.562733	-0.755937	-0.746987	-0.588183	-0.337348	-0.0390694	0.1931	0.366669	0.424647	0.375817	0.251006	0.102214	0.0319687	0.066604	0.163421	0.202315	0.153767	0.0612937	0.0676643	0.142716	0.261866	0.307027
0.421159	0.210886	-0.00658269	-0.178073	-0.198929	-0.124917	0.00410667	0.0530111	-0.00199971	-0.142326	-0.304892	-0.429645	-0.521067	-0.610461	-0.676297	-0.691724	-0.621007	-0.541154	-0.505034	-0.530209	-0.576482	-0.622774	-0.677423	-0.69223	-0.682666	-0.617591	-0.597362	-0.600064	-0.628506	-0.67823	-0.735344	-0.750238	-0.732344	-0.681736	-0.598315	-0.507092	-0.416179	-0.378756	-0.413091	-0.499117	-0.560203	-0.546866	-0.411645	-0.223256	-0.018056	0.119216	0.160516	0.10371	-0.0738942	-0.310439
-0.370977	-0.205714	0.0169556	0.246072	0.474986	0.623332	0.669926	0.605837	0.405462	0.13859	-0.12762	-0.396834	-0.594409	-0.690864	-0.638144	-0.475065	-0.332846	-0.330019	-0.458069	-0.578751	-0.625582	-0.459859	-0.151518	0.225324	0.515871	0.597806	0.522559	0.398439	0.418896	0.574077	0.769121	0.963263	1.06735	1.08079	0.961465	0.768201	0.505426	0.25312	0.104123	0.0697122	0.123745	0.212285	0.279006	0.321554	0.390993	0.462604	0.498755	0.454782	0.387596	0.336023
0.887346	0.816645	0.692427	0.461948	0.177215	-0.104223	-0.394568	-0.607651	-0.711676	-0.654818	-0.478939	-0.325558	-0.322509	-0.460609	-0.590764	-0.64127	-0.46254	-0.129997	0.276425	0.589776	0.678143	0.59699	0.463128	0.485189	0.652551	0.862905	1.07228	1.18454	1.19904	1.07035	0.861913	0.578512	0.306402	0.14571	0.108598	0.166872	0.262361	0.33432	0.380208	0.455097	0.532329	0.571317	0.523892	0.451434	0.395812	0.321815	0.14167	-0.0490624	-0.336267	-0.539852
-0.273631	-0.412998	-0.481983	-0.448505	-0.273801	0.0365095	0.397614	0.74356	0.936903	1.00481	1.01495	1.03001	1.03447	1.01457	0.899813	0.694113	0.45781	0.256204	0.125793	0.0451023	0.0633045	0.147425	0.267386	0.315716	0.301921	0.316559	0.457499	0.703818	0.990059	1.21342	1.32968	1.36874	1.36101	1.33124	1.25882	1.10426	0.893831	0.684635	0.517597	0.428359	0.362195	0.299725	0.209845	0.0833866	-0.0430675	-0.131465	-0.166258	-0.114639	-0.0221264	0.0529786
-0.621534	-0.675285	-0.777086	-0.885482	-0.990163	-1.06898	-1.07971	-1.03455	-0.928624	-0.758925	-0.608229	-0.476261	-0.358757	-0.219385	-0.142181	-0.172444	-0.309387	-0.556448	-0.802553	-0.968319	-1.02564	-0.936305	-0.780347	-0.600856	-0.428652	-0.281363	-0.154936	-0.0582887	-0.0854553	-0.200164	-0.319277	-0.39454	-0.428083	-0.41109	-0.408459	-0.358218	-0.301946	-0.220172	-0.19451	-0.215076	-0.308454	-0.451295	-0.601297	-0.752911	-0.839983	-0.821145	-0.738558	-0.655841	-0.619561	-0.636873
-0.181786	-0.166932	-0.148536	-0.205586	-0.282438	-0.377056	-0.457982	-0.513582	-0.486972	-0.388018	-0.296705	-0.167653	-0.108809	-0.0265803	0.0393617	0.0582063	0.0761148	0.0519974	-0.0494352	-0.183419	-0.304578	-0.340657	-0.274934	-0.18279	-0.119194	-0.155158	-0.220242	-0.260493	-0.287381	-0.29825	-0.354365	-0.3926	-0.417875	-0.353895	-0.190863	-0.0216823	0.150806	0.201008	0.21137	0.204944	0.170887	0.161914	0.149196	0.115792	0.0367509	-0.0220709	-0.18757	-0.362296	-0.455808	-0.409879
-0.724604	-0.660982	-0.617767	-0.572617	-0.546829	-0.567444	-0.630786	-0.802987	-0.945114	-1.01418	-0.890626	-0.592638	-0.187923	0.184147	0.384343	0.408592	0.267988	0.0845286	-0.0632559	-0.0795739	-0.0407864	0.0736653	0.134182	0.151895	0.163551	0.286835	0.477869	0.627777	0.702934	0.702676	0.600119	0.435377	0.286863	0.221055	0.214789	0.13978	0.00459068	-0.191108	-0.388947	-0.499716	-0.469812	-0.331973	-0.201503	-0.140301	-0.153931	-0.231543	-0.281002	-0.18772	0.0024246	0.186841
-1.13445	-1.05416	-0.910737	-0.691127	-0.453621	-0.263344	-0.231492	-0.345746	-0.536349	-0.593592	-0.531092	-0.431951	-0.342001	-0.283589	-0.198315	-0.0585165	0.180598	0.38121	0.496674	0.495552	0.455557	0.404278	0.367943	0.273897	0.146173	0.0692561	0.12852	0.28717	0.484294	0.711853	0.852173	0.953132	0.960369	0.958487	0.967701	0.899654	0.760964	0.590616	0.474801	0.500144	0.726282	0.955778	1.09299	1.00761	0.761803	0.507941	0.382283	0.459644	0.619459	0.747909
-0.346374	-0.264577	-0.0870002	0.0873307	0.191152	0.190848	0.0447373	-0.113377	-0.141733	-0.0218148	0.18365	0.34684	0.389551	0.281323	0.0845484	-0.142311	-0.343321	-0.424749	-0.455287	-0.450966	-0.452888	-0.437373	-0.354449	-0.186369	-0.0274294	0.0712933	0.100607	0.0261989	-0.0769354	-0.170208	-0.218609	-0.207961	-0.106548	0.101718	0.383746	0.61744	0.742189	0.687588	0.446262	0.0772326	-0.273509	-0.530262	-0.6593	-0.705218	-0.752483	-0.871431	-1.0321	-1.14675	-1.12588	-0.924103
-0.819677	-0.69879	-0.484444	-0.201678	0.077222	0.336317	0.47453	0.451375	0.354535	0.284581	0.290294	0.35228	0.434666	0.475606	0.454968	0.365902	0.194845	0.0186044	-0.110411	-0.148353	-0.132628	-0.109977	-0.106911	-0.0632895	0.0186663	0.149208	0.367403	0.630376	0.923063	1.10795	1.10468	0.946944	0.7735	0.586925	0.464508	0.424186	0.407172	0.411105	0.356594	0.24724	0.0983121	0.000663202	-0.0556272	-0.0320806	0.0966691	0.243528	0.365411	0.338447	0.189806	0.0558004
0.406498	0.276003	0.0911912	-0.0792403	-0.197056	-0.23303	-0.217593	-0.195357	-0.192347	-0.149523	-0.0690677	0.0590844	0.273286	0.531446	0.818775	1.00027	0.997065	0.84222	0.67195	0.48879	0.368613	0.329029	0.312327	0.316188	0.262675	0.155323	0.00912034	-0.0867413	-0.142001	-0.118886	0.00750741	0.151678	0.271331	0.24486	0.0989391	-0.0326133	-0.0950775	-0.0691893	-0.0207477	-0.0522477	-0.234232	-0.44366	-0.661655	-0.767694	-0.759133	-0.665017	-0.478345	-0.233703	0.0172895	0.236519
-1.00118	-1.00117	-1.03405	-1.02329	-0.96023	-0.844416	-0.657662	-0.41291	-0.161806	0.0575214	0.251316	0.304318	0.262861	0.07047	-0.171313	-0.361443	-0.496004	-0.510906	-0.43612	-0.351326	-0.317318	-0.385962	-0.509215	-0.615089	-0.700827	-0.746909	-0.735012	-0.711727	-0.643744	-0.558007	-0.506686	-0.500063	-0.52813	-0.491751	-0.335718	-0.0920222	0.126672	0.23147	0.180746	0.070244	0.0240944	0.0732638	0.192243	0.322358	0.368785	0.3136	0.173773	0.0284456	-0.0917012	-0.241928
-0.558875	-0.476073	-0.387938	-0.337499	-0.335605	-0.362927	-0.32567	-0.165874	0.0836983	0.307667	0.414992	0.363044	0.249878	0.202615	0.25297	0.374819	0.508071	0.555618	0.499102	0.355903	0.207071	0.084027	-0.0698228	-0.241781	-0.391866	-0.499474	-0.532758	-0.525042	-0.396165	-0.241137	-0.111309	-0.0480614	-0.0288008	0.00410442	0.0919754	0.200734	0.293769	0.314866	0.270209	0.236037	0.188598	0.179724	0.198703	0.256939	0.30285	0.277779	0.205452	0.138454	0.163317	0.280868
-0.543661	-0.64193	-0.707145	-0.740113	-0.736849	-0.703617	-0.551307	-0.38547	-0.245024	-0.206797	-0.289217	-0.433387	-0.568674	-0.704356	-0.758946	-0.709573	-0.617179	-0.537706	-0.549702	-0.662288	-0.825965	-0.943299	-0.981209	-0.904753	-0.796555	-0.687414	-0.508735	-0.261348	-0.00597418	0.157502	0.182074	0.0822805	-0.0536815	-0.199118	-0.320452	-0.383435	-0.511928	-0.63228	-0.695991	-0.633274	-0.401847	-0.146909	0.0331929	0.0637177	-0.0097701	-0.131624	-0.225598	-0.252949	-0.197237	-0.1344
0.359647	0.362759	0.427277	0.480282	0.550302	0.579677	0.594604	0.680026	0.729152	0.711552	0.598088	0.488316	0.417071	0.448729	0.517224	0.625025	0.694703	0.781184	0.883232	0.978839	1.09273	1.17859	1.25314	1.2603	1.21429	1.16629	1.11774	1.08409	1.0824	1.13004	1.18335	1.19498	1.16758	1.10143	0.96023	0.822531	0.731825	0.667147	0.650859	0.664973	0.677347	0.719118	0.736943	0.65296	0.449125	0.267829	0.150112	0.181493	0.226439	0.246815
-0.480633	-0.631013	-0.814579	-1.04424	-1.2373	-1.32777	-1.29636	-1.17824	-1.00287	-0.876964	-0.778011	-0.705265	-0.636081	-0.52033	-0.38713	-0.276571	-0.210882	-0.173664	-0.153977	-0.0927882	-0.0567759	-0.0462351	-0.104046	-0.204353	-0.347202	-0.52657	-0.672378	-0.724839	-0.714162	-0.645545	-0.535264	-0.422135	-0.332148	-0.232922	-0.191479	-0.173623	-0.196356	-0.185851	-0.152855	-0.151028	-0.192274	-0.258095	-0.266652	-0.222535	-0.145292	-0.0587886	-0.00764811	0.0315282	0.00597748	-0.0234895
-0.430912	-0.460953	-0.433339	-0.35853	-0.181806	0.105675	0.369913	0.464518	0.353487	0.0397448	-0.347404	-0.689403	-0.890341	-0.961574	-0.938757	-0.874874	-0.739049	-0.55865	-0.320476	-0.112844	0.0370625	0.0956194	0.105543	0.173842	0.221733	0.22963	0.114128	-0.133203	-0.39544	-0.557456	-0.588846	-0.491212	-0.352661	-0.230738	-0.173792	-0.147906	-0.0872012	0.0938105	0.310731	0.49318	0.606818	0.612932	0.501794	0.230392	-0.0147998	-0.179314	-0.160556	-0.0286009	0.195082	0.42047
0.0238376	0.00968958	-0.0379003	-0.121396	-0.186086	-0.174436	-0.055044	0.158695	0.350853	0.418823	0.360912	0.183018	-0.0174388	-0.141086	-0.195283	-0.248148	-0.354474	-0.600938	-0.862619	-1.01271	-0.976832	-0.795437	-0.597582	-0.477501	-0.518497	-0.66917	-0.851246	-0.973635	-0.97927	-0.937659	-0.880463	-0.83281	-0.708618	-0.527896	-0.320899	-0.142427	-0.049128	-0.0729952	-0.214754	-0.417446	-0.633501	-0.793589	-0.878261	-0.863563	-0.73779	-0.561074	-0.35203	-0.177928	-0.0299826	0.0170426
-0.0995226	0.0958617	0.237894	0.359426	0.486196	0.623314	0.753291	0.86178	0.899457	0.866395	0.744687	0.629024	0.5724	0.560874	0.578654	0.564043	0.526658	0.487707	0.414541	0.336886	0.329584	0.346348	0.380972	0.400665	0.367064	0.359955	0.383151	0.399068	0.369325	0.284386	0.181935	0.067628	-0.0350784	-0.149147	-0.192353	-0.186888	-0.00267412	0.312319	0.59298	0.688087	0.544527	0.247113	-0.0633351	-0.206178	-0.141084	-0.0797451	-0.104206	-0.212229	-0.272608	-0.185819
0.845306	0.682949	0.529221	0.447938	0.458633	0.579506	0.788799	0.984872	1.06245	1.04818	0.953308	0.824067	0.758979	0.762978	0.814756	0.854223	0.874901	0.845161	0.841393	0.924778	1.08773	1.35711	1.54673	1.63353	1.57939	1.45712	1.35309	1.35925	1.49348	1.69205	1.82004	1.78623	1.57866	1.29759	1.05727	0.910239	0.843263	0.740407	0.61499	0.475392	0.404372	0.454682	0.617522	0.851864	1.07515	1.18123	1.10483	0.918195	0.682584	0.515484
0.91713	0.814674	0.821123	0.947046	1.13059	1.24333	1.21023	1.00698	0.731779	0.496466	0.352506	0.286927	0.186215	0.0634132	-0.0732734	-0.142813	-0.0935512	0.0658922	0.295348	0.513973	0.617847	0.543036	0.360296	0.129598	-0.0340171	-0.103431	-0.140143	-0.184582	-0.287055	-0.373695	-0.440141	-0.449851	-0.47798	-0.566566	-0.684771	-0.818957	-0.830843	-0.711196	-0.521044	-0.335363	-0.144348	0.0154033	0.157202	0.255764	0.235809	0.156026	9.88307e-05	-0.21817	-0.417123	-0.524146
0.283006	0.235032	0.212828	0.198891	0.238194	0.343069	0.463856	0.554261	0.546109	0.457613	0.305462	0.236573	0.255615	0.303321	0.297043	0.200331	0.0752393	-0.0395829	-0.092269	-0.137537	-0.16001	-0.236803	-0.267084	-0.267456	-0.201411	-0.13541	-0.112945	-0.149564	-0.280036	-0.478854	-0.684798	-0.861446	-0.904634	-0.864366	-0.730708	-0.611431	-0.576536	-0.625047	-0.732376	-0.852212	-0.899877	-0.910705	-0.839837	-0.743755	-0.711313	-0.83139	-1.01818	-1.30531	-1.49913	-1.53461
-0.282934	-0.385795	-0.406644	-0.395277	-0.314682	-0.24089	-0.216278	-0.256398	-0.39934	-0.617163	-0.842792	-1.03632	-1.08364	-1.03952	-0.893091	-0.762412	-0.724181	-0.777329	-0.894919	-1.02621	-1.07843	-1.09029	-1.01265	-0.907385	-0.871841	-1.0034	-1.20804	-1.52262	-1.73496	-1.77383	-1.55343	-1.1815	-0.781331	-0.500023	-0.449511	-0.61131	-0.908689	-1.13543	-1.2143	-1.16493	-1.01987	-0.839047	-0.648631	-0.445371	-0.277826	-0.226705	-0.293833	-0.460167	-0.664941	-0.771757
-0.688823	-0.434875	-0.148219	0.139287	0.358473	0.518313	0.581674	0.486434	0.292545	0.0213674	-0.287989	-0.572008	-0.815514	-0.972451	-1.07893	-1.12867	-0.943663	-0.566553	-0.137379	0.246682	0.516913	0.656275	0.79772	0.887909	0.976672	1.08469	1.21069	1.37897	1.57162	1.66176	1.6064	1.4148	1.17978	1.05181	1.04702	1.10489	1.21498	1.28063	1.25074	1.15845	0.972797	0.891314	0.907971	1.00879	1.17342	1.32092	1.41151	1.42023	1.31321	1.15798
-0.586422	-0.48915	-0.352336	-0.187097	0.0317089	0.240867	0.428114	0.590008	0.688752	0.720336	0.718294	0.687587	0.64357	0.585094	0.479922	0.360798	0.252926	0.193529	0.179623	0.206335	0.229504	0.232569	0.257399	0.298214	0.364994	0.422377	0.420631	0.392745	0.376106	0.350322	0.298228	0.233981	0.156657	0.146878	0.185633	0.232973	0.2794	0.326807	0.373946	0.378299	0.255256	0.0769898	-0.11096	-0.242833	-0.224831	-0.109323	-0.00533231	-0.0367072	-0.16585	-0.239768
-0.855451	-0.826216	-0.706598	-0.51266	-0.251795	-0.00145926	0.151336	0.189301	0.10967	0.00752269	-0.0753688	-0.0607204	0.0746951	0.218085	0.301289	0.262284	0.138559	0.00495629	0.00899028	0.0596428	0.209491	0.274326	0.28955	0.278717	0.286879	0.300194	0.3169	0.346878	0.337831	0.440217	0.648678	1.07227	1.60171	1.99039	2.09126	1.8275	1.25213	0.578392	-0.0203069	-0.382118	-0.489656	-0.379695	-0.188772	0.0114647	0.146069	0.195065	0.167969	0.0923152	-0.0471516	-0.172091
0.00957238	-0.0380657	-0.0772583	-0.103611	-0.0673954	0.0451851	0.155356	0.227024	0.172502	0.020574	-0.230404	-0.540483	-0.834936	-1.08476	-1.27955	-1.38014	-1.35381	-1.17814	-0.904113	-0.637012	-0.43394	-0.301178	-0.226269	-0.183072	-0.151494	-0.139831	-0.14152	-0.124984	-0.0787644	-0.0173768	-0.00537343	-0.0283538	-0.0889452	-0.241354	-0.462757	-0.67802	-0.837572	-0.970691	-1.02449	-1.05612	-1.04682	-0.989701	-0.830266	-0.629814	-0.412007	-0.216191	-0.0987414	-0.0731842	-0.106054	-0.129425
-1.06329	-0.990345	-0.948214	-0.905108	-0.831206	-0.663301	-0.461145	-0.241488	-0.044008	0.0744391	0.100213	0.0670643	0.0434943	0.0114432	-0.0129352	0.0127734	0.0847552	0.189874	0.249763	0.296272	0.379616	0.46461	0.491371	0.439456	0.32098	0.209293	0.118353	0.0289619	-0.0677076	-0.132119	-0.148848	-0.0897461	-0.0145012	0.00659587	-0.0446702	-0.16915	-0.253323	-0.272083	-0.233813	-0.161641	-0.0739797	0.0124776	0.0959187	0.135147	0.190506	0.233927	0.223871	0.25104	0.326963	0.37872
0.591308	0.416219	0.300506	0.290843	0.348623	0.464704	0.535764	0.590949	0.689839	0.790687	0.82244	0.760841	0.620265	0.487745	0.379842	0.273777	0.159075	0.0826492	0.0627999	0.132926	0.222206	0.247239	0.18641	0.038711	-0.061164	-0.0834235	-0.0380149	0.0476206	0.151633	0.254217	0.353223	0.399769	0.465454	0.516974	0.505042	0.53728	0.627364	0.688776	0.669525	0.627581	0.663831	0.822997	1.03729	1.18948	1.22668	1.09168	0.837359	0.569033	0.244189	-0.0309803
0.0174211	0.0152781	-0.0181194	-0.042649	-0.0865357	-0.120123	-0.152462	-0.237725	-0.330043	-0.374977	-0.282864	-0.190661	-0.144996	-0.205858	-0.31039	-0.380604	-0.33965	-0.142338	0.116317	0.322339	0.341935	0.238592	0.0876723	0.00879155	0.0646077	0.17204	0.32788	0.420278	0.395485	0.249004	0.112021	0.0594417	0.115175	0.257947	0.35999	0.396312	0.392394	0.423157	0.436563	0.477714	0.518217	0.564942	0.604865	0.597069	0.545585	0.500979	0.526515	0.657249	0.860115	0.968915
-0.45621	-0.474176	-0.419282	-0.275249	-0.0266409	0.268277	0.528105	0.688345	0.730038	0.685663	0.602653	0.491848	0.43132	0.480537	0.633558	0.871994	1.07247	1.20789	1.20174	1.10953	1.05704	1.06602	1.08431	1.00491	0.765898	0.48449	0.261585	0.161988	0.287752	0.565886	0.857671	1.04653	1.06477	0.970804	0.80519	0.610421	0.390647	0.259853	0.276724	0.38907	0.529276	0.581748	0.621474	0.650607	0.690471	0.716057	0.708831	0.615665	0.523516	0.409496
0.821471	0.79023	0.831989	0.89766	0.944839	0.882744	0.658972	0.395512	0.186825	0.0935798	0.211323	0.471717	0.744892	0.92171	0.938787	0.850809	0.695759	0.513412	0.307655	0.185203	0.200998	0.306179	0.437442	0.486568	0.52376	0.551035	0.588357	0.61231	0.605546	0.518321	0.43205	0.325302	0.30857	0.341452	0.364795	0.302152	0.154124	-0.0620631	-0.224044	-0.260599	-0.159123	0.0329421	0.227909	0.362659	0.456506	0.476362	0.362009	0.182132	-0.0499403	-0.225974
0.674948	0.562768	0.439274	0.38396	0.371192	0.394654	0.417501	0.411049	0.327851	0.245562	0.143741	0.127782	0.159146	0.181412	0.12166	-0.0195354	-0.225743	-0.380247	-0.415114	-0.318323	-0.135123	0.0508444	0.179374	0.268889	0.287829	0.178754	0.00718041	-0.21418	-0.382088	-0.471809	-0.501773	-0.547601	-0.5776	-0.559374	-0.471288	-0.380765	-0.376262	-0.436554	-0.474746	-0.414171	-0.200897	0.0865902	0.316465	0.392677	0.232764	0.0152103	-0.109112	-0.0621634	0.0810596	0.215696
-1.12619	-1.05681	-0.935541	-0.7814	-0.660605	-0.63983	-0.702992	-0.743002	-0.679543	-0.456117	-0.154944	0.0858743	0.165714	-0.00181123	-0.229722	-0.359963	-0.310779	-0.160738	-0.0196918	0.0202537	-0.0306123	-0.0890617	-0.103265	-0.120258	-0.210057	-0.344632	-0.531487	-0.658628	-0.66089	-0.587289	-0.433264	-0.237238	-0.0417514	0.137016	0.2997	0.401606	0.437391	0.358528	0.167007	-0.0182309	-0.16194	-0.215706	-0.118748	0.0529791	0.174486	0.23863	0.16349	-0.0436005	-0.249972	-0.334196
-0.270704	-0.194676	-0.0756021	0.0859989	0.262425	0.433106	0.601255	0.706585	0.743572	0.66206	0.464104	0.272643	0.124106	0.068534	0.16875	0.346246	0.471835	0.538134	0.460469	0.246421	0.0331167	-0.0539375	0.0194014	0.211952	0.387516	0.463279	0.438091	0.30883	0.109434	-0.0272525	-0.141872	-0.166744	-0.130799	-0.130897	-0.09935	-0.0629195	-0.0509591	-0.0914447	-0.158337	-0.322413	-0.555813	-0.745276	-0.840943	-0.847999	-0.878766	-0.886355	-0.919952	-0.938682	-0.932398	-0.939769
-0.133205	-0.0589808	-0.0128277	0.00953164	0.043823	0.0789857	0.161895	0.294758	0.460528	0.636881	0.725545	0.696258	0.593523	0.465916	0.338938	0.201045	0.0809041	-0.0137008	-0.0248241	0.00938029	0.0235169	-0.0704831	-0.23893	-0.413585	-0.539945	-0.588156	-0.548105	-0.429961	-0.321375	-0.189922	-0.00976056	0.197258	0.436539	0.647172	0.778574	0.73382	0.530533	0.238832	0.00621203	-0.148564	-0.219912	-0.211925	-0.146401	0.0117845	0.137401	0.24918	0.308559	0.290009	0.205321	0.0488142
-0.155131	-0.0376214	0.141852	0.345234	0.589697	0.807452	0.945628	0.898566	0.6848	0.378063	0.133452	-0.0293023	-0.104329	-0.0959295	-0.0270286	0.139311	0.271403	0.388944	0.451385	0.431878	0.342825	0.17825	-0.0204425	-0.185675	-0.225072	-0.179881	0.0668995	0.35277	0.606627	0.719104	0.68771	0.550421	0.381743	0.207624	0.0282162	-0.156315	-0.309315	-0.384276	-0.377554	-0.302786	-0.188195	-0.0496426	0.00389466	-0.0633943	-0.16791	-0.277348	-0.297617	-0.238793	-0.189413	-0.197845
-0.614156	-0.649254	-0.582394	-0.472394	-0.189344	0.126713	0.40229	0.52439	0.490311	0.341275	0.158165	-0.0308519	-0.22561	-0.42593	-0.592021	-0.673396	-0.666099	-0.584933	-0.460538	-0.310131	-0.252013	-0.325059	-0.438517	-0.557318	-0.579322	-0.515465	-0.46186	-0.471013	-0.5777	-0.764837	-0.935304	-1.01539	-0.973146	-0.83239	-0.654314	-0.45848	-0.265076	-0.0739909	0.145283	0.388187	0.575688	0.656535	0.556754	0.25924	-0.101539	-0.389038	-0.508731	-0.525832	-0.483959	-0.419066
-0.586107	-0.565416	-0.502695	-0.402975	-0.276887	-0.228238	-0.297946	-0.406219	-0.519591	-0.540589	-0.479651	-0.428495	-0.43723	-0.539041	-0.717626	-0.880302	-0.956726	-0.916415	-0.782091	-0.612154	-0.42527	-0.240705	-0.0583525	0.1509	0.382703	0.561635	0.638788	0.543566	0.259649	-0.0846412	-0.359002	-0.473224	-0.489543	-0.449585	-0.387657	-0.353124	-0.334971	-0.369958	-0.417859	-0.463659	-0.454116	-0.395942	-0.284883	-0.151911	-0.100127	-0.0885873	-0.106446	-0.0853454	-0.0755597	0.0103429
0.878538	0.923646	0.899097	0.747959	0.441026	0.0898753	-0.188098	-0.303824	-0.320358	-0.279873	-0.21713	-0.182143	-0.163751	-0.199199	-0.24773	-0.294133	-0.284464	-0.225524	-0.113003	0.0217201	0.0741859	0.0858772	0.0677837	0.0891618	0.0990764	0.18611	0.270142	0.296633	0.172732	-0.0612368	-0.325815	-0.522135	-0.556204	-0.430151	-0.217953	-0.029103	0.0772525	0.117439	0.187017	0.253593	0.296537	0.267606	0.142338	0.0174769	-0.0965031	-0.167507	-0.196246	-0.198114	-0.21085	-0.226099
-0.891813	-0.674659	-0.400845	-0.12656	0.099523	0.217129	0.264107	0.345444	0.423273	0.473473	0.439653	0.293214	0.147251	0.0140084	-0.0689956	-0.102592	-0.104775	-0.119664	-0.137489	-0.167219	-0.155341	-0.0558625	0.0867032	0.304351	0.515292	0.733455	0.90975	0.971268	0.96791	0.877404	0.804773	0.764123	0.793208	0.831142	0.792603	0.735925	0.681304	0.702351	0.832878	1.01756	1.29616	1.588	1.78326	1.80138	1.63638	1.36723	1.09727	0.854074	0.629853	0.440297
-0.0546623	-0.0936441	-0.118393	-0.12693	-0.145484	-0.168954	-0.197981	-0.186385	-0.0892567	0.0499398	0.262444	0.4684	0.681407	0.853536	0.9136	0.910321	0.821954	0.751039	0.71135	0.739748	0.776786	0.739157	0.683819	0.630489	0.651038	0.778481	0.958797	1.23082	1.51576	1.7064	1.72409	1.56299	1.3002	1.03662	0.799176	0.580254	0.395177	0.25287	0.179448	0.0912371	0.0693671	0.0363678	0.0701099	0.125663	0.252375	0.376088	0.523315	0.667333	0.743673	0.757399
-0.287065	-0.184608	-0.0697694	0.0469982	0.198073	0.30167	0.387246	0.377325	0.196142	-0.172012	-0.628091	-1.03071	-1.26542	-1.27873	-1.13942	-0.967975	-0.866064	-0.780517	-0.72673	-0.620218	-0.480651	-0.372128	-0.301559	-0.213915	-0.0399971	0.180651	0.380006	0.467415	0.322233	-0.000992917	-0.424495	-0.799708	-1.00903	-1.04854	-0.885865	-0.65381	-0.424614	-0.320596	-0.328872	-0.456359	-0.678317	-0.852434	-0.892576	-0.839725	-0.753118	-0.675812	-0.604226	-0.44666	-0.177855	0.165448
0.728199	0.402126	0.0452391	-0.340911	-0.670192	-0.852098	-0.888428	-0.738843	-0.525457	-0.314699	-0.21905	-0.22666	-0.34389	-0.547992	-0.708101	-0.745014	-0.696415	-0.616775	-0.545689	-0.479862	-0.334971	-0.0877921	0.227893	0.518514	0.663249	0.685739	0.644877	0.608984	0.656291	0.787796	0.912876	0.973447	0.84497	0.644336	0.43461	0.239458	0.117707	0.0711306	0.10794	0.1573	0.195316	0.156652	0.0567789	-0.050272	-0.127947	-0.163413	-0.15721	-0.198572	-0.320478	-0.483797
-0.270683	-0.0868869	0.0869041	0.199272	0.261356	0.239564	0.147919	0.0496871	-0.0215891	-0.0541328	-0.0484413	-0.0863953	-0.198258	-0.348123	-0.523066	-0.693214	-0.783495	-0.814333	-0.767095	-0.707022	-0.68451	-0.71006	-0.71499	-0.684832	-0.617965	-0.550983	-0.511642	-0.46171	-0.381805	-0.314899	-0.235094	-0.177178	-0.19206	-0.263108	-0.36698	-0.44589	-0.458953	-0.392562	-0.278208	-0.140359	-0.0887186	-0.126284	-0.249434	-0.371613	-0.488926	-0.544822	-0.542687	-0.529434	-0.443381	-0.3566
-0.454952	-0.454997	-0.4537	-0.452993	-0.426233	-0.35176	-0.283353	-0.201758	-0.142542	-0.157758	-0.230401	-0.336603	-0.417283	-0.430639	-0.362758	-0.245839	-0.104897	-0.0520981	-0.090506	-0.216419	-0.34134	-0.461284	-0.518435	-0.516252	-0.502702	-0.414718	-0.325989	-0.249142	-0.193569	-0.201172	-0.251105	-0.285367	-0.34441	-0.380391	-0.384092	-0.321265	-0.22774	-0.0927463	0.0121987	0.103266	0.129068	0.0465025	-0.174994	-0.408284	-0.617623	-0.764915	-0.877039	-0.924007	-0.863431	-0.738205
-0.19992	-0.190955	-0.203693	-0.193178	-0.163849	-0.0574325	0.0870748	0.22293	0.34787	0.481921	0.609987	0.710504	0.719701	0.650805	0.479507	0.251985	0.0829605	0.102037	0.264938	0.569985	0.852222	1.08959	1.09428	0.922544	0.582864	0.250359	0.0617586	0.0441382	0.152425	0.251722	0.243978	0.178886	0.118449	0.0983643	0.146876	0.199686	0.268223	0.333439	0.377774	0.342055	0.171183	-0.0823001	-0.296599	-0.345687	-0.233645	-0.0999773	-0.0509339	-0.149994	-0.350184	-0.522836
0.512104	0.186416	-0.0603691	-0.178593	-0.162852	-0.0561571	0.0364671	0.0292431	-0.0314745	-0.0878501	-0.106585	-0.0613332	-0.0120721	0.0518587	0.112693	0.154049	0.120729	-0.0386601	-0.275109	-0.475007	-0.520796	-0.416283	-0.291598	-0.245851	-0.338253	-0.524991	-0.686041	-0.766416	-0.747018	-0.634092	-0.463072	-0.272883	-0.119806	-0.0527567	-0.0257987	-0.0433528	-0.0880846	-0.163375	-0.267565	-0.372567	-0.49167	-0.549887	-0.510112	-0.356356	-0.153171	0.041958	0.208349	0.232364	0.0687114	-0.229968
-0.583653	-0.686816	-0.745344	-0.758488	-0.708407	-0.593276	-0.430405	-0.249278	-0.103496	-0.0396414	-0.0139679	-0.0306856	-0.0732859	-0.144988	-0.244215	-0.344213	-0.45764	-0.513084	-0.475204	-0.328774	-0.135271	0.0505602	0.209023	0.231893	0.0760388	-0.208409	-0.491212	-0.673563	-0.664446	-0.442234	-0.129526	0.247773	0.530611	0.712033	0.705673	0.504215	0.181393	-0.0949199	-0.258185	-0.224453	-0.0895698	0.0471969	0.122545	0.0777285	-0.000447685	-0.0947484	-0.139114	-0.200128	-0.278472	-0.409347
1.06507	0.920435	0.693917	0.509548	0.364959	0.358825	0.522647	0.775778	0.924201	0.946048	0.795684	0.580575	0.361221	0.185546	0.0983499	0.112204	0.16877	0.278109	0.432177	0.576651	0.733834	0.873449	0.959002	1.04292	1.12562	1.22635	1.32545	1.44153	1.46427	1.42281	1.34087	1.28313	1.29631	1.34774	1.37924	1.34493	1.25691	1.17713	1.11423	1.07991	1.07381	1.10005	1.13962	1.26822	1.3797	1.46589	1.48184	1.35786	1.09175	0.807446
0.222527	0.129604	-0.051768	-0.302206	-0.573978	-0.814779	-1.02503	-1.12449	-1.1171	-1.05526	-0.92943	-0.854438	-0.891138	-1.00494	-1.1438	-1.21298	-1.16367	-1.083	-0.991633	-0.89856	-0.855597	-0.897319	-1.00637	-1.18	-1.36687	-1.506	-1.56053	-1.51745	-1.47097	-1.45394	-1.45387	-1.43	-1.3976	-1.41853	-1.48302	-1.53899	-1.60601	-1.56676	-1.41991	-1.2435	-1.14891	-1.2295	-1.37282	-1.55892	-1.68181	-1.69818	-1.62597	-1.53578	-1.46641	-1.411
-1.06219	-0.946014	-0.838095	-0.749469	-0.693408	-0.650598	-0.597441	-0.535103	-0.515421	-0.566891	-0.693291	-0.81928	-0.854871	-0.813377	-0.720884	-0.636185	-0.590388	-0.59945	-0.646402	-0.661405	-0.624521	-0.559239	-0.517029	-0.530557	-0.600653	-0.643345	-0.650587	-0.628409	-0.624014	-0.676241	-0.780069	-0.885573	-0.98276	-1.05773	-1.10115	-1.12376	-1.13578	-1.08966	-0.96712	-0.775787	-0.596532	-0.491577	-0.495084	-0.587117	-0.70216	-0.728549	-0.640562	-0.474562	-0.353582	-0.328249
-0.83195	-0.655286	-0.462617	-0.264985	-0.135869	-0.121656	-0.211687	-0.392123	-0.553831	-0.658715	-0.719592	-0.733797	-0.688828	-0.524925	-0.300152	-0.0809109	0.00958747	0.0733416	0.112722	0.173134	0.199009	0.164089	0.0517326	-0.137408	-0.323211	-0.465825	-0.537666	-0.55075	-0.503882	-0.409782	-0.244027	-0.0923251	-0.0188173	-0.0713115	-0.205087	-0.349773	-0.415818	-0.372007	-0.258796	-0.133213	-0.0566567	0.0252094	0.0813451	0.0873381	0.111634	0.121935	0.225513	0.371288	0.542198	0.687326
-0.0935076	0.0273526	0.136725	0.251009	0.304291	0.276149	0.150086	-0.062127	-0.270595	-0.430605	-0.51121	-0.52589	-0.473305	-0.367726	-0.181752	-0.0115442	0.0709304	0.0120327	-0.138061	-0.300397	-0.374498	-0.325343	-0.198322	-0.0574196	0.0284752	0.120328	0.183311	0.190035	0.217295	0.228852	0.345066	0.508622	0.700381	0.863212	1.00175	1.04928	1.06166	1.05514	1.04945	1.10446	1.13523	1.2161	1.24599	1.23202	1.09403	0.884946	0.770697	0.752542	0.786519	0.823593
0.498879	0.57803	0.684834	0.830276	0.966783	1.0912	1.13977	1.15242	1.14576	1.13995	1.19617	1.22762	1.31027	1.34082	1.32654	1.18551	0.971818	0.855051	0.836496	0.871223	0.909113	0.893775	0.815367	0.76877	0.707816	0.717349	0.805088	0.872591	0.894834	0.803076	0.618707	0.360368	0.218377	0.262874	0.505873	0.827808	1.03601	1.02163	0.742562	0.327718	-0.0494379	-0.210305	-0.177256	-0.0156054	0.148944	0.264858	0.330112	0.386039	0.458307	0.604161
-0.152769	-0.207275	-0.286975	-0.3889	-0.492407	-0.512008	-0.520654	-0.462964	-0.409519	-0.402986	-0.44799	-0.507695	-0.540537	-0.556817	-0.617327	-0.673862	-0.66895	-0.608767	-0.508132	-0.456023	-0.438898	-0.467064	-0.513001	-0.584193	-0.632046	-0.670173	-0.729913	-0.758085	-0.801247	-0.848249	-0.913485	-0.921911	-0.813816	-0.619917	-0.455813	-0.438094	-0.53462	-0.767391	-1.01644	-1.21484	-1.25805	-1.18729	-1.05429	-0.894236	-0.775975	-0.609744	-0.394791	-0.139879	0.0716764	0.203494
0.286691	0.275085	0.241448	0.108392	-0.0223141	-0.124182	-0.184623	-0.24245	-0.271612	-0.229171	-0.159408	-0.108979	-0.14528	-0.198116	-0.275178	-0.253243	-0.185158	-0.120718	-0.132461	-0.232087	-0.389002	-0.593084	-0.762967	-0.835368	-0.724743	-0.524716	-0.281876	-0.112469	-0.0300926	-0.0523253	-0.173243	-0.375517	-0.583865	-0.814853	-0.964237	-1.0564	-1.08895	-1.01619	-0.848385	-0.633152	-0.446031	-0.23938	-0.0838704	0.106031	0.238178	0.344071	0.353995	0.22911	0.020212	-0.227356
-0.72884	-0.676997	-0.678899	-0.708302	-0.744753	-0.760745	-0.759443	-0.772067	-0.816226	-0.809587	-0.781784	-0.70879	-0.589595	-0.454363	-0.310231	-0.192806	-0.0417608	0.113209	0.237635	0.285103	0.294446	0.248513	0.238573	0.187635	0.105486	-0.0797504	-0.27385	-0.450749	-0.585309	-0.639783	-0.663575	-0.641719	-0.677939	-0.697213	-0.719722	-0.772058	-0.819869	-0.75555	-0.545059	-0.246101	0.0396273	0.253145	0.305274	0.224552	0.106511	-0.00134206	-0.0774334	-0.0561223	-0.0111746	0.0262436
-0.60539	-0.617998	-0.59785	-0.57716	-0.575214	-0.632687	-0.740753	-0.784937	-0.695505	-0.513804	-0.270177	-0.00987582	0.119589	0.0874188	-0.075577	-0.240144	-0.268088	-0.162749	0.0378142	0.265361	0.424592	0.550805	0.643408	0.758598	0.91736	1.04594	1.03334	0.929097	0.760386	0.678393	0.735033	0.895224	0.990933	0.971294	0.783767	0.474067	0.166697	-0.0803799	-0.232877	-0.279546	-0.260543	-0.21959	-0.193505	-0.135482	-0.0812834	-0.029581	-0.000468205	0.0761218	0.253018	0.453452
-0.394296	-0.285971	-0.128983	0.0709484	0.274724	0.416369	0.535863	0.623536	0.732594	0.882904	1.00463	0.992711	0.894016	0.734286	0.656658	0.710283	0.861946	0.95256	0.933967	0.756423	0.46321	0.172203	-0.0617201	-0.206099	-0.250283	-0.232292	-0.193519	-0.168822	-0.113889	-0.0625755	-0.0136256	0.0139373	0.08645	0.253929	0.443693	0.613266	0.692445	0.688615	0.653666	0.639422	0.618278	0.540903	0.417593	0.337789	0.275526	0.323173	0.407875	0.508406	0.641215	0.803084
-0.717743	-0.654015	-0.568155	-0.411816	-0.192673	0.0227919	0.175193	0.212312	0.104495	-0.0714947	-0.27441	-0.439619	-0.541893	-0.571383	-0.549613	-0.496216	-0.400982	-0.294161	-0.164532	-0.0931574	-0.0754555	-0.143662	-0.206954	-0.239263	-0.258885	-0.291629	-0.353213	-0.387585	-0.409161	-0.347245	-0.223495	-0.029233	0.109142	0.212717	0.210309	0.134543	0.0172275	-0.0891442	-0.143398	-0.169869	-0.151186	-0.168171	-0.178382	-0.186888	-0.199082	-0.233182	-0.284631	-0.410712	-0.531544	-0.639252
0.615238	0.414303	0.283108	0.363676	0.583818	0.898327	1.23162	1.41711	1.43951	1.27827	0.967027	0.642394	0.313329	0.0454747	-0.137451	-0.240341	-0.181504	0.0194651	0.287544	0.561609	0.757946	0.894323	0.957816	0.949086	0.827511	0.6732	0.492033	0.29684	0.118201	-0.0136367	-0.119233	-0.22881	-0.344956	-0.400027	-0.377816	-0.307911	-0.250927	-0.217995	-0.30973	-0.389751	-0.395668	-0.222541	0.11298	0.511252	0.880205	1.14117	1.27369	1.30259	1.22034	1.0874
-0.136128	-0.298076	-0.466785	-0.629109	-0.77054	-0.88839	-0.89964	-0.840141	-0.77379	-0.793562	-0.908703	-0.995413	-1.03208	-0.924993	-0.734587	-0.515351	-0.40534	-0.406216	-0.510991	-0.684867	-0.881825	-1.00142	-1.08559	-1.06446	-0.979733	-0.864361	-0.685436	-0.524141	-0.357255	-0.238732	-0.178321	-0.16926	-0.180125	-0.177181	-0.1807	-0.204547	-0.269944	-0.319717	-0.327662	-0.24403	-0.11935	-0.0614388	-0.0869247	-0.165739	-0.222452	-0.276986	-0.344466	-0.375999	-0.348638	-0.295242
-0.0313121	0.015683	-0.0164661	-0.0683432	-0.0721887	0.0095405	0.160336	0.292985	0.40086	0.438627	0.421061	0.468678	0.60206	0.735036	0.787205	0.703977	0.543387	0.38048	0.277572	0.212575	0.174809	0.13999	0.0897111	0.0268531	0.0029871	0.0498209	0.126359	0.242622	0.341678	0.425373	0.518432	0.595362	0.621357	0.588568	0.431063	0.201947	0.0453871	0.066054	0.23672	0.372186	0.469863	0.557233	0.619179	0.5757	0.483534	0.348048	0.149441	-0.0166461	-0.0925369	-0.0297583
0.797891	0.820033	0.823875	0.795939	0.719926	0.558849	0.370417	0.258381	0.260099	0.342658	0.462436	0.576577	0.679623	0.747706	0.835572	0.918203	0.928529	0.90955	0.83103	0.6922	0.515343	0.390574	0.31375	0.337957	0.389531	0.40605	0.354761	0.24597	0.0969132	-0.0661643	-0.174717	-0.211445	-0.129094	0.0147071	0.196662	0.353426	0.44918	0.437372	0.317816	0.156528	-0.00407793	-0.0965095	-0.144448	-0.21193	-0.257641	-0.329768	-0.410905	-0.436541	-0.469121	-0.56643
-0.418077	-0.403248	-0.456542	-0.494361	-0.570361	-0.655664	-0.683625	-0.719159	-0.82529	-1.03817	-1.30418	-1.4617	-1.44032	-1.26422	-1.05055	-0.944691	-1.00865	-1.19115	-1.35526	-1.44464	-1.3921	-1.19967	-0.950603	-0.683824	-0.480027	-0.338243	-0.249727	-0.250834	-0.343868	-0.487011	-0.679415	-0.835377	-0.92859	-1.03908	-1.15089	-1.29357	-1.40229	-1.45359	-1.44806	-1.30364	-1.13339	-0.925883	-0.743979	-0.565999	-0.43959	-0.452356	-0.627935	-0.894912	-1.1171	-1.2037
-0.304998	-0.378813	-0.486258	-0.57378	-0.633003	-0.722164	-0.828293	-0.963733	-1.06694	-1.11564	-1.11038	-0.973297	-0.81168	-0.614709	-0.442037	-0.27309	-0.153097	-0.165215	-0.331883	-0.58531	-0.796218	-0.878424	-0.790257	-0.604362	-0.439912	-0.280717	-0.111979	0.054001	0.165543	0.194132	0.15885	0.0846216	0.00091748	-0.10142	-0.158334	-0.148606	-0.0226176	0.123513	0.205018	0.171119	0.0367815	-0.102809	-0.164332	-0.156833	-0.18006	-0.169512	-0.218377	-0.250553	-0.339554	-0.478986
0.111223	0.0506342	-0.0834537	-0.215637	-0.281025	-0.209067	0.0100943	0.318672	0.578091	0.710785	0.643903	0.392708	0.0294969	-0.272092	-0.429244	-0.461306	-0.45423	-0.393667	-0.295003	-0.203499	-0.0901774	0.000785937	-0.0254057	-0.142088	-0.245895	-0.294557	-0.320481	-0.328238	-0.269243	-0.137109	0.0513767	0.229325	0.266289	0.206743	0.0442772	-0.0981657	-0.15655	-0.0734328	0.114997	0.348065	0.482892	0.442474	0.326785	0.224517	0.301187	0.492469	0.675825	0.899779	1.14985	1.31549
0.621241	0.563506	0.559477	0.621852	0.728671	0.735376	0.670565	0.532803	0.400573	0.271618	0.186529	0.114018	0.0924923	0.0908763	0.05484	-0.00241789	-0.0911405	-0.233303	-0.43034	-0.649436	-0.791423	-0.863581	-0.829716	-0.696942	-0.448371	-0.166873	0.0501751	0.199458	0.309705	0.404678	0.478716	0.520494	0.505871	0.392989	0.208229	0.0375992	-0.0620637	-0.0533252	0.016628	0.105911	0.183508	0.215229	0.206159	0.169065	0.0896087	-0.0201277	-0.0187731	0.0570506	0.18065	0.237815
-0.0177683	0.00272179	0.0408954	-0.0174267	-0.118171	-0.295804	-0.447939	-0.508752	-0.471089	-0.371072	-0.19992	0.0367929	0.226526	0.343862	0.324933	0.172016	-0.0139442	-0.161431	-0.260338	-0.327249	-0.36883	-0.427304	-0.406847	-0.295023	-0.131732	-0.0413927	-0.0122131	-0.0165689	-0.0245453	0.0203896	0.0557859	0.0957759	0.0984843	0.0347837	-0.084075	-0.223091	-0.360827	-0.440755	-0.464069	-0.353607	-0.155424	0.059835	0.173226	0.180136	0.0997774	-0.00482899	-0.0696868	-0.0497563	0.0879702	0.299037
-0.155246	-0.0161273	0.086766	0.143709	0.159186	0.184735	0.175208	0.138447	0.12209	0.133323	0.147207	0.162866	0.244776	0.360807	0.483431	0.592459	0.676512	0.65711	0.599842	0.479221	0.389149	0.313814	0.270899	0.272776	0.261186	0.24817	0.260995	0.287808	0.265452	0.263208	0.265818	0.339866	0.428344	0.528181	0.610544	0.683318	0.67371	0.52756	0.302697	0.0422167	-0.0368842	-0.00977304	0.0694362	0.165204	0.219431	0.267853	0.387543	0.545663	0.639557	0.615269
-0.19931	-0.0963629	-0.0446144	-0.0202327	-0.0131198	0.0367104	0.0837332	0.164452	0.283237	0.49049	0.59468	0.582095	0.45304	0.258812	0.0799296	-0.0520688	-0.0541339	0.0391472	0.123466	0.114042	0.0196019	-0.0978354	-0.198603	-0.185391	-0.0530602	0.137569	0.322472	0.429813	0.519742	0.513177	0.477445	0.35902	0.182877	-0.117616	-0.440216	-0.648505	-0.692403	-0.523177	-0.19548	0.208889	0.528227	0.792449	0.95622	1.02155	0.968639	0.840572	0.807163	0.872151	0.972552	1.05958
-0.127208	0.0229186	0.200548	0.439105	0.549323	0.550235	0.424783	0.235977	0.0620883	-0.0662252	-0.0682327	0.0224443	0.10441	0.0952485	0.00344467	-0.110714	-0.208669	-0.195826	-0.0671889	0.118118	0.29786	0.402204	0.489622	0.483241	0.448506	0.333388	0.162162	-0.129943	-0.443537	-0.646011	-0.688684	-0.524182	-0.205633	0.187448	0.497871	0.754717	0.913915	0.977419	0.925988	0.801496	0.76902	0.832193	0.929792	1.01439	1.02817	0.855367	0.539012	0.131247	-0.226659	-0.482817
0.784173	0.800063	0.807443	0.767205	0.584653	0.282792	-0.0986167	-0.43339	-0.67299	-0.806931	-0.802633	-0.619164	-0.344662	-0.128486	-0.0952966	-0.208233	-0.378566	-0.532426	-0.555256	-0.427803	-0.288327	-0.264123	-0.442252	-0.735572	-1.02748	-1.25085	-1.38479	-1.4358	-1.47352	-1.44727	-1.37754	-1.27976	-1.14676	-1.00811	-0.93132	-0.984518	-1.04086	-1.12516	-1.0666	-0.94242	-0.817994	-0.683912	-0.598354	-0.534859	-0.533038	-0.619734	-0.692729	-0.697471	-0.587478	-0.415003
0.412675	0.304076	0.127804	0.0351985	0.0291627	0.152433	0.344514	0.551274	0.674016	0.717274	0.674323	0.585391	0.476325	0.344627	0.218637	0.0837763	0.00531279	0.0142085	0.0972628	0.211742	0.281483	0.224083	0.0742951	-0.172562	-0.372497	-0.501553	-0.471063	-0.407845	-0.305306	-0.166382	0.0308135	0.17426	0.24748	0.220134	0.150846	0.0774488	0.0502692	0.0317625	0.0243068	-0.0136008	-0.0255629	-0.015367	0.0764525	0.238931	0.385758	0.505147	0.493702	0.329658	0.111753	-0.0732561
-0.955443	-0.6998	-0.466055	-0.257882	-0.139073	-0.0959046	-0.0684629	0.0134361	0.117442	0.237625	0.265848	0.162505	-0.0438816	-0.184634	-0.226526	-0.282374	-0.397269	-0.605846	-0.732964	-0.74499	-0.567645	-0.355195	-0.149564	-0.00976153	0.130482	0.257104	0.355899	0.384547	0.305649	0.175504	0.0237219	-0.11459	-0.212474	-0.215018	-0.149254	0.00591022	0.0955322	0.112746	0.0376338	-0.0529258	-0.0854313	-0.0499696	0.00446824	0.00541167	0.0610714	0.146632	0.274259	0.313602	0.259304	0.0933251
-0.428025	-0.332953	-0.271945	-0.291808	-0.376635	-0.533721	-0.675429	-0.736869	-0.694222	-0.576415	-0.4583	-0.41798	-0.456062	-0.534805	-0.583153	-0.582163	-0.59046	-0.553614	-0.508586	-0.439511	-0.307952	-0.126967	0.0539227	0.202281	0.228166	0.151209	0.0299535	-0.0474918	-0.10404	-0.136397	-0.219519	-0.346675	-0.436056	-0.43267	-0.352686	-0.264698	-0.248145	-0.304117	-0.333302	-0.30077	-0.140402	0.0953193	0.290727	0.397829	0.375441	0.265048	0.128587	-0.044203	-0.215591	-0.349905
-0.640756	-0.606945	-0.553498	-0.541019	-0.602771	-0.732656	-0.932984	-1.11133	-1.2189	-1.22601	-1.07367	-0.816895	-0.626679	-0.543966	-0.579145	-0.728591	-0.912259	-1.03951	-1.06011	-0.988559	-0.856293	-0.697076	-0.524816	-0.342117	-0.23194	-0.178321	-0.160204	-0.118196	0.0316887	0.210968	0.34842	0.401099	0.3841	0.313338	0.23656	0.0874653	-0.0368344	-0.0779464	-0.0545827	0.0396817	0.110583	0.159957	0.175085	0.204893	0.240952	0.342174	0.4775	0.645144	0.731576	0.721197
-0.0468858	-0.108757	-0.229965	-0.371882	-0.516602	-0.611886	-0.633618	-0.577527	-0.46378	-0.275179	-0.133646	0.0074422	0.15478	0.306341	0.421567	0.42424	0.33769	0.306828	0.430843	0.691546	1.05157	1.29978	1.47186	1.45058	1.32324	1.11945	0.844636	0.569693	0.335189	0.178848	0.0735805	0.0394891	0.0710052	0.230035	0.570738	0.934585	1.21606	1.30539	1.25511	1.06128	0.829861	0.597388	0.420162	0.373721	0.399596	0.434634	0.414302	0.335882	0.331651	0.429236
0.844099	0.705989	0.507239	0.255233	0.0261568	-0.137442	-0.219302	-0.227661	-0.269611	-0.276225	-0.284779	-0.271055	-0.232667	-0.200382	-0.17656	-0.166227	-0.117456	-0.0405177	0.0987325	0.231163	0.370038	0.435155	0.368194	0.182679	-0.0898385	-0.316712	-0.472008	-0.48597	-0.39477	-0.275812	-0.139832	-0.0558381	-0.0202539	-0.0476719	-0.0873963	-0.122371	-0.14214	-0.16524	-0.165999	-0.214183	-0.268446	-0.36151	-0.438813	-0.508842	-0.51727	-0.493544	-0.407895	-0.285496	-0.166374	-0.0781728
-0.165589	-0.0968257	-0.0350282	0.00545982	0.0488447	0.152379	0.263595	0.382806	0.460687	0.526088	0.591991	0.672357	0.696715	0.667244	0.605906	0.46965	0.386816	0.334126	0.380314	0.50894	0.586307	0.548706	0.369176	0.0553119	-0.199558	-0.342748	-0.332964	-0.263189	-0.160653	-0.0871184	-0.0908652	-0.111771	-0.235599	-0.399077	-0.582731	-0.719248	-0.832387	-0.913485	-0.974899	-0.981248	-0.904826	-0.768917	-0.62649	-0.546129	-0.60422	-0.671895	-0.711437	-0.634557	-0.456559	-0.25226
-0.249486	-0.233226	-0.20897	-0.302653	-0.453074	-0.625856	-0.764542	-0.879477	-0.961864	-1.02425	-1.0307	-0.953067	-0.814999	-0.670311	-0.588673	-0.647687	-0.716437	-0.756606	-0.678506	-0.497681	-0.290137	-0.102651	0.0794252	0.184331	0.192481	0.119555	-0.0631387	-0.249213	-0.367282	-0.363858	-0.331689	-0.330859	-0.393366	-0.51375	-0.64514	-0.681883	-0.653569	-0.551606	-0.460758	-0.413634	-0.458792	-0.518806	-0.58643	-0.572335	-0.440664	-0.254861	-0.103284	-0.0180297	-0.0190042	-0.119287
0.52216	0.711734	0.843558	0.894024	0.84082	0.708911	0.508287	0.268639	0.0411012	-0.0471688	0.00453779	0.219279	0.471702	0.687033	0.836799	0.894821	0.941429	1.03897	1.26729	1.53273	1.70999	1.75313	1.65022	1.48323	1.31253	1.20667	1.18494	1.2167	1.28515	1.46058	1.6546	1.8045	1.85965	1.73213	1.41807	0.932555	0.366575	-0.063261	-0.230973	-0.181449	0.0667977	0.414889	0.808825	1.10946	1.25269	1.25963	1.17455	0.983911	0.760103	0.568454
0.462665	0.55165	0.507805	0.36942	0.198847	0.111192	0.168876	0.226849	0.282352	0.216971	0.045131	-0.117112	-0.212244	-0.263028	-0.271676	-0.285107	-0.33963	-0.386387	-0.406876	-0.375559	-0.318986	-0.297357	-0.321121	-0.380778	-0.464801	-0.483182	-0.431048	-0.358193	-0.249326	-0.14357	-0.0411287	0.0891186	0.214059	0.25437	0.196231	0.039778	-0.0993166	-0.123592	0.0201402	0.363271	0.791645	1.19626	1.45869	1.55687	1.49742	1.3213	1.00659	0.63652	0.327527	0.11635
0.330557	0.350424	0.428537	0.524058	0.547314	0.475334	0.307004	0.157349	0.131231	0.285875	0.655056	1.11595	1.55129	1.83363	1.93928	1.8753	1.68582	1.34722	0.94905	0.616599	0.38939	0.28698	0.322959	0.492941	0.773988	1.06325	1.32038	1.4097	1.31471	1.17046	1.05599	1.0608	1.15721	1.27999	1.35144	1.3622	1.32265	1.26199	1.19973	1.02233	0.801108	0.517266	0.321773	0.289433	0.439155	0.635576	0.775921	0.754834	0.70796	0.689942
1.08342	1.13236	1.06724	0.90715	0.75371	0.643036	0.647379	0.734455	0.845354	0.909894	0.919614	0.883891	0.829101	0.772865	0.612633	0.412821	0.156448	-0.0201251	-0.0493355	0.085897	0.263308	0.390071	0.371024	0.328687	0.312413	0.330065	0.306586	0.241977	0.207838	0.163594	0.0256431	-0.236106	-0.485358	-0.65773	-0.651493	-0.465699	-0.187718	0.0221066	0.167423	0.255467	0.364131	0.490216	0.679204	0.875403	1.0003	1.0188	0.94794	0.812114	0.655561	0.546059
-0.262155	-0.1972	-0.128685	-0.022042	0.0988055	0.275571	0.450136	0.56126	0.577724	0.514675	0.393826	0.254534	0.157106	0.0861187	0.0221213	-0.0256593	-0.0409183	-0.0145957	0.0710498	0.194201	0.285618	0.2776	0.185955	0.0672841	-0.0401275	-0.071621	-0.037258	0.044779	0.199013	0.43649	0.681282	0.859853	0.915086	0.908135	0.849291	0.75101	0.586242	0.421887	0.245	0.0995157	-0.0238664	-0.0536055	-0.0434034	0.0186192	0.0431427	-0.029638	-0.152281	-0.290239	-0.394881	-0.469045
-0.532449	-0.595883	-0.586296	-0.46466	-0.284889	-0.0169354	0.262394	0.488103	0.623802	0.627752	0.587699	0.453998	0.348879	0.294224	0.299063	0.255736	0.179691	0.12444	0.0595185	-0.0439646	-0.243201	-0.489219	-0.748623	-0.936992	-0.968009	-0.888656	-0.738209	-0.526397	-0.278098	-0.0734214	0.0267385	-0.0744558	-0.250949	-0.389539	-0.450184	-0.422364	-0.324448	-0.29425	-0.283985	-0.31581	-0.309679	-0.188871	-0.0461166	0.122667	0.216623	0.26178	0.273769	0.220933	0.0941093	-0.128936
-0.827287	-0.944818	-1.01343	-0.971956	-0.871688	-0.722648	-0.523641	-0.290353	-0.0980496	-0.0039447	-0.0990214	-0.264845	-0.395057	-0.452035	-0.425898	-0.333901	-0.305529	-0.295884	-0.325785	-0.320024	-0.20652	-0.0723954	0.0861849	0.17446	0.216888	0.228152	0.17851	0.0593534	-0.150208	-0.401901	-0.578522	-0.705366	-0.797958	-0.853301	-0.956822	-1.09665	-1.17777	-1.11999	-0.991807	-0.804509	-0.631706	-0.493463	-0.337083	-0.199363	-0.0881778	0.0341082	0.104422	0.0930304	0.0390542	-0.0780963
-0.277749	-0.24117	-0.156156	0.0034381	0.162291	0.332353	0.42275	0.466198	0.477733	0.426897	0.304876	0.0902771	-0.167466	-0.348332	-0.478225	-0.573043	-0.629716	-0.735726	-0.878914	-0.961989	-0.902815	-0.771552	-0.579752	-0.402795	-0.261229	-0.10109	0.0399406	0.153799	0.279024	0.351028	0.339363	0.284089	0.164123	0.0680587	-0.0371801	-0.11969	-0.159028	-0.172872	-0.169446	-0.185184	-0.255686	-0.329518	-0.405259	-0.47009	-0.544515	-0.656162	-0.735483	-0.771832	-0.746642	-0.618915
-1.05873	-0.830038	-0.661585	-0.486503	-0.332211	-0.217662	-0.0738957	0.0527153	0.154932	0.267354	0.331996	0.321524	0.271901	0.1642	0.0779585	-0.0165203	-0.0905941	-0.12591	-0.138339	-0.135263	-0.149392	-0.212686	-0.278969	-0.346965	-0.405168	-0.471983	-0.572216	-0.643426	-0.676059	-0.653445	-0.538777	-0.332693	-0.103683	0.111253	0.176522	0.125559	-0.0116565	-0.181066	-0.316285	-0.351605	-0.340515	-0.296998	-0.274337	-0.273038	-0.229706	-0.129702	0.0513086	0.202635	0.244411	0.152609
0.153877	0.0866468	0.00473875	-0.103836	-0.189807	-0.271426	-0.333397	-0.404538	-0.51126	-0.587081	-0.621827	-0.597748	-0.475657	-0.25623	-0.012393	0.21646	0.285954	0.231692	0.0855922	-0.0947861	-0.238759	-0.276366	-0.264558	-0.218224	-0.194096	-0.192712	-0.146575	-0.0400963	0.152634	0.313757	0.358239	0.260493	0.0681646	-0.19323	-0.414882	-0.553829	-0.596896	-0.563868	-0.507574	-0.386801	-0.260055	-0.12521	0.0649001	0.25732	0.417473	0.501367	0.543268	0.502248	0.412872	0.302427
-0.0574458	0.000325704	0.0920582	0.270854	0.462408	0.633503	0.726227	0.772537	0.727201	0.628419	0.50635	0.376805	0.250722	0.143908	0.0677383	0.0639268	0.14028	0.308233	0.555556	0.790498	0.927821	0.980242	0.941708	0.939079	1.03685	1.26271	1.59042	1.89451	2.10711	2.20441	2.24205	2.25799	2.32708	2.36606	2.36947	2.38943	2.32043	2.19781	1.94399	1.65305	1.32305	0.993191	0.700949	0.488676	0.340292	0.270982	0.256177	0.350419	0.520178	0.675825
-0.894313	-0.696367	-0.477737	-0.316659	-0.247276	-0.363464	-0.565519	-0.743463	-0.822708	-0.837498	-0.819008	-0.796671	-0.827451	-0.861757	-0.853434	-0.771692	-0.688573	-0.632513	-0.588767	-0.541242	-0.502651	-0.533859	-0.649203	-0.840234	-1.05495	-1.2374	-1.28804	-1.23447	-1.1155	-0.997011	-0.893765	-0.79767	-0.683389	-0.601304	-0.566885	-0.583809	-0.583011	-0.549409	-0.487948	-0.437601	-0.499882	-0.611053	-0.776056	-0.933026	-1.04944	-1.10657	-1.11977	-1.1032	-1.04409	-0.965826
-0.390886	-0.331558	-0.273811	-0.230153	-0.253145	-0.363037	-0.544352	-0.748149	-0.921314	-0.969378	-0.918533	-0.805621	-0.693156	-0.595161	-0.503953	-0.395484	-0.317575	-0.284906	-0.300969	-0.300212	-0.268319	-0.209984	-0.162197	-0.221311	-0.326828	-0.483439	-0.632425	-0.742917	-0.797138	-0.809669	-0.793941	-0.737841	-0.663556	-0.565349	-0.448258	-0.319754	-0.217393	-0.126615	-0.0790984	-0.0723783	-0.0935003	-0.185082	-0.258857	-0.335379	-0.419548	-0.484547	-0.571213	-0.699933	-0.83317	-0.941267
-0.584855	-0.640788	-0.657263	-0.645405	-0.619222	-0.541528	-0.442152	-0.310771	-0.154129	0.017782	0.154719	0.27616	0.339727	0.348717	0.32046	0.197943	0.0992487	-0.00312102	-0.115721	-0.202675	-0.318616	-0.490816	-0.669059	-0.813669	-0.878204	-0.834818	-0.743743	-0.63108	-0.544782	-0.443035	-0.314814	-0.157218	-0.0833961	-0.0627532	-0.149137	-0.3216	-0.481029	-0.576308	-0.527632	-0.342113	-0.166544	-0.144458	-0.227041	-0.365392	-0.405189	-0.305303	-0.105819	0.156016	0.351922	0.39661
-0.0488449	-0.030767	-0.0626139	-0.103616	-0.207278	-0.382165	-0.57548	-0.732318	-0.80231	-0.755255	-0.656479	-0.53429	-0.440695	-0.330344	-0.191282	-0.0203598	0.0597041	0.0820926	-0.0115951	-0.198641	-0.371551	-0.474887	-0.422094	-0.220889	-0.0304747	-0.00652123	-0.0960864	-0.246136	-0.289299	-0.180966	0.0353854	0.319361	0.531831	0.580298	0.469223	0.164309	-0.233379	-0.515393	-0.59736	-0.492099	-0.255255	-0.0462023	0.134849	0.283576	0.353311	0.339061	0.250431	0.092358	-0.0753181	-0.144876
0.663004	0.7377	0.704291	0.562326	0.253461	-0.133615	-0.414848	-0.496589	-0.391619	-0.15543	0.053044	0.233594	0.38191	0.451452	0.437242	0.348856	0.191221	0.0240087	-0.0453564	-0.00442012	0.143051	0.362684	0.518447	0.557635	0.422158	0.256732	0.187039	0.259315	0.486215	0.804476	1.04083	1.14993	1.13991	1.0736	1.03099	1.01867	1.0263	1.06029	1.04441	0.980945	0.896779	0.797911	0.732665	0.685136	0.614243	0.620709	0.7623	0.940672	1.12355	1.24613
-0.387664	-0.262199	-0.0975385	0.0960576	0.327554	0.483265	0.521432	0.389481	0.228359	0.160479	0.230875	0.451871	0.761852	0.992061	1.09832	1.08856	1.02397	0.982474	0.970468	0.977902	1.01101	0.995543	0.933729	0.851753	0.755457	0.691909	0.645616	0.576568	0.582866	0.720772	0.894504	1.07262	1.19202	1.16055	1.07731	1.01468	1.06252	1.24279	1.52278	1.82184	2.08835	2.24909	2.27043	2.11675	1.81267	1.53424	1.49288	1.69213	2.11531	2.51383
0.853428	1.12854	1.38206	1.59677	1.73188	1.74835	1.60042	1.30773	1.03974	0.999925	1.19171	1.59904	1.98263	2.16656	2.07229	1.77658	1.43646	1.0912	0.82277	0.661356	0.66014	0.698613	0.762771	0.737879	0.644072	0.518432	0.485421	0.522219	0.561785	0.500606	0.418934	0.357996	0.385722	0.529957	0.744895	0.935421	1.04034	1.0755	1.02423	0.876362	0.638273	0.371898	0.152028	0.0520383	-0.00239284	-0.0387567	-0.124139	-0.221212	-0.350039	-0.483522
-0.880013	-0.866713	-0.816209	-0.796309	-0.803565	-0.873945	-0.961527	-1.07776	-1.19819	-1.26261	-1.32231	-1.30787	-1.24125	-1.11831	-0.976143	-0.824994	-0.67259	-0.522938	-0.34492	-0.261364	-0.250798	-0.351853	-0.569955	-0.774803	-0.911241	-0.925562	-0.846983	-0.747722	-0.734972	-0.787275	-0.871874	-0.925694	-0.940591	-0.911917	-0.834275	-0.714746	-0.642944	-0.635093	-0.703815	-0.848346	-1.01129	-1.11876	-1.18265	-1.1858	-1.16297	-1.15946	-1.18038	-1.28501	-1.37306	-1.36704
-0.908654	-0.806379	-0.744016	-0.678443	-0.627849	-0.614647	-0.637633	-0.752587	-0.849331	-0.84272	-0.740314	-0.604172	-0.494434	-0.531418	-0.666125	-0.777291	-0.754452	-0.580276	-0.379068	-0.231725	-0.20956	-0.217871	-0.221745	-0.10667	0.00522283	0.0628764	0.040459	-0.0614136	-0.132914	-0.0986253	0.120421	0.407982	0.67472	0.740702	0.654037	0.511978	0.427184	0.514822	0.689243	0.899676	1.00231	0.918612	0.714724	0.532437	0.415029	0.315457	0.164723	-0.0563357	-0.285178	-0.429086
0.480369	0.378605	0.297306	0.270887	0.294996	0.363861	0.448712	0.492756	0.468065	0.414224	0.315113	0.220889	0.0516011	-0.135694	-0.337025	-0.45729	-0.49568	-0.519316	-0.521775	-0.585708	-0.605674	-0.561918	-0.44421	-0.353865	-0.364957	-0.456648	-0.561297	-0.584562	-0.554771	-0.426584	-0.260273	-0.0500694	0.0990171	0.197908	0.24194	0.184752	0.100484	0.0257585	-0.0625764	-0.128473	-0.222255	-0.376406	-0.545161	-0.696	-0.753326	-0.716922	-0.608729	-0.50703	-0.477527	-0.500986
0.375872	0.215536	0.0986304	-0.0309071	-0.0817673	-0.123739	-0.138254	-0.0925438	0.036572	0.195412	0.299592	0.273522	0.113058	-0.0865094	-0.249384	-0.254337	-0.0803691	0.213774	0.594439	0.963261	1.17726	1.20262	1.09629	0.910825	0.810486	0.787371	0.86064	0.938309	1.00733	1.08983	1.2292	1.25883	1.17527	0.979508	0.771606	0.638995	0.571701	0.70895	0.970081	1.13605	1.22702	1.35899	1.49433	1.5395	1.48757	1.40119	1.36017	1.32865	1.28531	1.17346
-0.583788	-0.59446	-0.586808	-0.61629	-0.67506	-0.767365	-0.805754	-0.791133	-0.723854	-0.640566	-0.59561	-0.591914	-0.590525	-0.594126	-0.602535	-0.555634	-0.461345	-0.323747	-0.214335	-0.172346	-0.231811	-0.391695	-0.557051	-0.720255	-0.773259	-0.691098	-0.524044	-0.351292	-0.236507	-0.222138	-0.329419	-0.512802	-0.674279	-0.749963	-0.713325	-0.520736	-0.252616	-0.00969018	0.152871	0.180281	0.104324	-0.0464867	-0.250612	-0.471987	-0.597871	-0.564738	-0.371777	-0.10617	0.137112	0.238264
-0.646129	-0.719585	-0.759159	-0.752182	-0.558499	-0.236435	0.111182	0.345825	0.416327	0.32909	0.182056	0.0295124	-0.0571561	-0.0395545	0.104613	0.275083	0.316296	0.167715	-0.103828	-0.365113	-0.540945	-0.609156	-0.605145	-0.58341	-0.502772	-0.458558	-0.351095	-0.223137	-0.0970622	0.0467773	0.166883	0.257875	0.298552	0.274373	0.196785	0.129434	0.0786164	0.0889078	0.142859	0.103689	-0.0668641	-0.272066	-0.435123	-0.424753	-0.383152	-0.233715	-0.0619298	0.0202678	-0.0150343	-0.142549
-0.751154	-0.518036	-0.277892	0.0050084	0.277972	0.438873	0.526333	0.498859	0.405546	0.324611	0.298973	0.327816	0.343137	0.260514	0.132112	-0.0550564	-0.252581	-0.450543	-0.61781	-0.66862	-0.597486	-0.434279	-0.200996	0.0522122	0.27434	0.433441	0.43235	0.362071	0.254819	0.153974	0.096378	0.152158	0.242566	0.302862	0.223993	0.00431513	-0.305457	-0.684241	-0.963853	-1.11351	-1.0624	-0.881857	-0.627875	-0.422109	-0.288137	-0.251858	-0.295185	-0.380174	-0.449521	-0.434659
-0.253653	-0.361405	-0.409643	-0.379653	-0.321902	-0.284935	-0.321471	-0.389704	-0.443917	-0.407125	-0.258181	-0.0770881	0.0520619	0.119026	0.177313	0.223955	0.300459	0.330452	0.275555	0.13147	-0.016569	-0.184851	-0.385965	-0.643492	-0.836717	-0.896938	-0.683775	-0.30996	0.0528268	0.256364	0.226822	0.110353	-0.00146055	-0.0170757	0.0432227	0.0978436	0.0690655	0.0339783	-0.0587921	-0.159888	-0.265548	-0.335866	-0.352603	-0.250688	-0.0594102	0.192292	0.469645	0.672979	0.776008	0.794332
0.285346	0.415552	0.531709	0.676817	0.780572	0.879875	0.992732	1.11222	1.22522	1.35688	1.47108	1.50243	1.43144	1.22531	1.02007	0.86748	0.832225	0.892711	0.97499	1.04557	1.04811	0.964723	0.820289	0.667691	0.555088	0.547044	0.623648	0.793499	0.970385	1.10056	1.11141	1.04583	0.875886	0.709395	0.57308	0.605723	0.752393	0.944849	1.17842	1.38727	1.55689	1.59631	1.55015	1.43627	1.36211	1.39035	1.5184	1.67892	1.76427	1.76644
1.45702	1.2713	1.03796	0.842666	0.708325	0.682407	0.740207	0.818833	0.886278	0.888705	0.809022	0.671001	0.525177	0.417573	0.409886	0.483089	0.6454	0.814432	0.938832	0.949194	0.88653	0.724129	0.565029	0.434766	0.46596	0.606119	0.790031	1.01323	1.21281	1.3749	1.41257	1.36846	1.25964	1.18877	1.21575	1.33812	1.49151	1.57307	1.57514	1.46316	1.24685	1.00635	0.886409	0.930335	1.1022	1.37502	1.61631	1.7528	1.72666	1.62026
0.597184	0.826591	0.995038	1.07269	1.01499	0.891472	0.702312	0.459494	0.200759	-0.0322658	-0.268545	-0.477387	-0.593238	-0.660071	-0.707682	-0.739454	-0.749804	-0.722584	-0.59077	-0.425472	-0.344318	-0.35134	-0.439537	-0.535381	-0.616622	-0.630088	-0.606339	-0.586189	-0.582787	-0.617763	-0.691623	-0.818836	-0.900453	-0.882274	-0.720466	-0.462579	-0.162253	0.0591697	0.147332	0.0504886	-0.158124	-0.432244	-0.662504	-0.803678	-0.885137	-0.97438	-1.05487	-1.11144	-1.09119	-0.997266
-1.23602	-0.974537	-0.634351	-0.283893	0.0588237	0.32333	0.466073	0.476351	0.398652	0.271005	0.0848026	-0.127132	-0.315737	-0.441601	-0.45231	-0.318342	-0.136451	-0.0527491	-0.193927	-0.45455	-0.663297	-0.736138	-0.629754	-0.426612	-0.195327	-0.0199766	0.124387	0.190907	0.1707	0.0471379	-0.129572	-0.33008	-0.460886	-0.499055	-0.412351	-0.323704	-0.25021	-0.155795	-0.0300763	0.0334346	-0.0622082	-0.261707	-0.442468	-0.508696	-0.422438	-0.26552	-0.0207732	0.177185	0.357984	0.566437
-0.190897	0.0300484	0.2483	0.408855	0.396799	0.215655	-0.0613966	-0.376374	-0.572732	-0.591253	-0.461502	-0.29605	-0.221143	-0.212582	-0.233726	-0.275893	-0.268666	-0.318681	-0.378909	-0.395616	-0.368454	-0.273972	-0.158728	-0.071317	-0.021594	-0.0422088	-0.0588317	-0.0556502	-0.0320327	0.0453595	0.14774	0.253938	0.306247	0.328589	0.369893	0.435104	0.51071	0.57595	0.543066	0.388054	0.134991	-0.167096	-0.371272	-0.424188	-0.377384	-0.251029	-0.119115	0.0188301	0.114156	0.213906
0.108868	0.259139	0.426571	0.562131	0.569686	0.367803	0.0603618	-0.27851	-0.553685	-0.665291	-0.567529	-0.381746	-0.208085	-0.060645	0.00892696	0.07779	0.114353	0.129049	0.0749957	-0.0263594	-0.179663	-0.25871	-0.313804	-0.323737	-0.274915	-0.191562	-0.0812645	-0.00605267	0.0161651	-0.0293938	-0.0930638	-0.202159	-0.288982	-0.367499	-0.354105	-0.283436	-0.237319	-0.245463	-0.264677	-0.242311	-0.14896	-0.0122247	0.0789908	0.137844	0.126325	0.041798	-0.0708526	-0.186622	-0.259823	-0.286474
-0.286372	-0.100524	0.0657424	0.240884	0.366612	0.41596	0.448366	0.359791	0.297509	0.230636	0.219669	0.28983	0.438856	0.605605	0.660513	0.567898	0.387633	0.202095	0.0552013	0.0434151	0.197885	0.426287	0.613432	0.670744	0.604395	0.422223	0.228908	0.123007	0.177621	0.285303	0.276913	0.106474	-0.187114	-0.529887	-0.77458	-0.89401	-0.909361	-0.869438	-0.789072	-0.645056	-0.545652	-0.466679	-0.422712	-0.333726	-0.166254	0.0665182	0.296559	0.445348	0.511027	0.510606
-0.142189	-0.112403	-0.0202349	0.112013	0.232063	0.361665	0.447377	0.396603	0.199511	-0.0143682	-0.128874	-0.00142822	0.210027	0.446503	0.521217	0.462532	0.358143	0.262565	0.231469	0.183528	0.164707	0.143484	0.209702	0.410442	0.681284	0.900256	0.94511	0.888842	0.821335	0.81491	0.807856	0.717616	0.538239	0.25725	-0.00822768	-0.215458	-0.284432	-0.235286	-0.110622	0.0759901	0.275574	0.437084	0.513719	0.507069	0.491788	0.490187	0.537969	0.622177	0.645434	0.610481
-0.0842867	-0.0606409	-0.0910858	-0.170995	-0.300309	-0.44865	-0.505911	-0.441384	-0.335371	-0.20141	-0.140193	-0.152851	-0.174596	-0.259022	-0.405054	-0.571869	-0.694048	-0.722735	-0.579445	-0.292413	-0.0274852	0.130633	0.108951	-4.46198e-05	-0.142426	-0.246899	-0.305311	-0.271894	-0.238514	-0.259246	-0.232689	-0.193791	-0.112526	0.0110839	0.151851	0.332299	0.438523	0.439692	0.28563	0.0911572	-0.0895463	-0.230871	-0.316223	-0.378304	-0.387409	-0.395429	-0.397822	-0.445882	-0.479245	-0.49734
-0.384773	-0.557108	-0.728608	-0.821007	-0.822908	-0.749462	-0.675067	-0.635137	-0.655947	-0.640433	-0.565641	-0.411692	-0.236949	-0.143116	-0.13343	-0.229464	-0.377139	-0.492121	-0.500405	-0.4553	-0.414734	-0.442384	-0.430228	-0.389509	-0.365004	-0.365068	-0.36127	-0.318537	-0.243159	-0.108898	-0.00594371	0.0299104	-0.0435074	-0.144246	-0.233531	-0.196984	-0.0176048	0.209641	0.387916	0.416902	0.309097	0.100351	-0.0123724	-0.00924065	0.120472	0.223989	0.247063	0.177205	-0.00730142	-0.230658
-0.0344311	-0.097874	-0.11476	-0.0785075	-0.00488796	0.127191	0.226699	0.261352	0.190392	0.0930265	0.0067302	0.042054	0.215428	0.435066	0.607374	0.635389	0.531192	0.329435	0.220485	0.223512	0.348882	0.448934	0.471235	0.403716	0.225386	0.00950669	-0.205384	-0.425329	-0.652959	-0.817199	-0.892038	-0.878178	-0.793271	-0.694669	-0.548107	-0.391155	-0.206578	-0.0572358	-0.00823379	-0.0622598	-0.166808	-0.235174	-0.229406	-0.0850424	0.0896526	0.234754	0.280738	0.258486	0.194207	0.151865
0.04416	-0.0859312	-0.199211	-0.314782	-0.374995	-0.331776	-0.250899	-0.123537	-0.03831	-0.0295492	-0.0922497	-0.185543	-0.234752	-0.193899	-0.0617318	0.144667	0.384013	0.566261	0.630135	0.540427	0.342713	0.0892358	-0.140232	-0.257392	-0.258871	-0.200119	-0.179555	-0.216321	-0.282261	-0.321675	-0.267993	-0.139796	-0.0283631	-0.0441216	-0.195403	-0.35391	-0.444414	-0.436941	-0.375974	-0.342747	-0.363909	-0.407263	-0.419691	-0.418785	-0.445616	-0.525725	-0.680602	-0.872261	-0.966147	-0.933557
0.421956	0.306624	0.10445	-0.161949	-0.374324	-0.487396	-0.479108	-0.411493	-0.374642	-0.398112	-0.446193	-0.459977	-0.458972	-0.488729	-0.577575	-0.749342	-0.961902	-1.06603	-1.02988	-0.904016	-0.799155	-0.720188	-0.671601	-0.636394	-0.642922	-0.683221	-0.730142	-0.804568	-0.887097	-0.947682	-0.983608	-0.998404	-1.0422	-1.09431	-1.11932	-1.14285	-1.15902	-1.11307	-1.01832	-0.842976	-0.664908	-0.474723	-0.343241	-0.310859	-0.296822	-0.349347	-0.384201	-0.418706	-0.464671	-0.547184
-0.520404	-0.619698	-0.740108	-0.834551	-0.880292	-0.914085	-0.932713	-0.879792	-0.770692	-0.568776	-0.363725	-0.144723	0.00668178	0.0439706	0.0601344	-0.000349756	-0.040484	-0.0802183	-0.133148	-0.228163	-0.309785	-0.391266	-0.491987	-0.616287	-0.76958	-0.899905	-0.999261	-0.995482	-0.927459	-0.836936	-0.78387	-0.783026	-0.764148	-0.749377	-0.707787	-0.729176	-0.834034	-0.92298	-0.830446	-0.587647	-0.288612	-0.154287	-0.282392	-0.536335	-0.817071	-0.999133	-1.01886	-0.914145	-0.839324	-0.750016
-1.18049	-1.06166	-0.904393	-0.717004	-0.52191	-0.269249	-0.0274708	0.207593	0.419426	0.584663	0.67814	0.73723	0.782453	0.812124	0.821655	0.788825	0.734985	0.658993	0.50402	0.343939	0.224912	0.216361	0.326282	0.451491	0.584779	0.728197	0.749973	0.732003	0.665142	0.505914	0.305035	0.0865005	-0.0666394	-0.0627909	0.0527286	0.272861	0.52432	0.733075	0.802088	0.777144	0.721334	0.759533	0.804548	0.837725	0.805323	0.706906	0.653452	0.630995	0.741369	0.9287
0.407313	0.12955	-0.0914667	-0.223904	-0.212745	-0.0919742	0.124899	0.372635	0.578299	0.646291	0.621716	0.566733	0.604365	0.648714	0.6814	0.649478	0.552518	0.499856	0.477731	0.58647	0.771028	0.981608	1.10046	1.12336	1.06587	0.927657	0.802988	0.69581	0.666843	0.728115	0.884903	1.0311	1.09266	1.07936	1.05429	1.04216	1.12385	1.22816	1.32223	1.31082	1.15818	0.877742	0.575982	0.290372	0.0445269	-0.0442402	-0.101518	-0.0700671	0.0311903	0.157763
0.382588	0.461204	0.520437	0.553457	0.562136	0.579673	0.608035	0.62033	0.620438	0.613048	0.602504	0.590381	0.560861	0.500901	0.439148	0.419477	0.463872	0.584215	0.728926	0.832003	0.86609	0.865524	0.911226	0.988596	1.09152	1.14258	1.2081	1.2947	1.40995	1.5276	1.61122	1.6159	1.49541	1.2582	0.962576	0.71765	0.546618	0.495089	0.593423	0.831559	1.1771	1.56253	1.89501	2.09459	2.10297	1.93297	1.64736	1.31668	1.08255	0.995821
-0.323751	-0.49938	-0.681504	-0.787206	-0.793433	-0.746322	-0.629942	-0.497726	-0.342181	-0.200915	-0.0199624	0.189375	0.490586	0.730503	0.938324	1.01337	1.00222	0.983602	0.910289	0.829326	0.747184	0.702889	0.641078	0.534445	0.42296	0.299416	0.18748	0.0530826	-0.0471696	-0.064394	0.065476	0.290335	0.48014	0.578486	0.640714	0.65253	0.59955	0.587455	0.700766	0.927387	1.0936	1.10409	1.03214	0.948866	0.999986	1.11359	1.14696	0.995223	0.719642	0.437326
0.762424	0.831965	0.796187	0.632383	0.396982	0.171583	0.0559145	0.069318	0.229382	0.452085	0.632288	0.739072	0.796934	0.767224	0.652977	0.521627	0.390692	0.308216	0.245046	0.294434	0.388419	0.443871	0.463	0.380512	0.231154	0.0212285	-0.171856	-0.285679	-0.243303	-0.115511	0.118405	0.385183	0.569001	0.61359	0.491038	0.240943	0.0412875	-0.0436382	-0.0149466	0.00299058	-0.071014	-0.215094	-0.346355	-0.349855	-0.169841	0.0865654	0.370901	0.62005	0.771398	0.839269
0.227721	0.186757	0.070137	-0.0861773	-0.290703	-0.4812	-0.596836	-0.553784	-0.423957	-0.186313	0.0847147	0.271461	0.31676	0.192255	-0.0618239	-0.26466	-0.350939	-0.32179	-0.303567	-0.378751	-0.525127	-0.658479	-0.662034	-0.479152	-0.218661	0.0702046	0.323323	0.477083	0.546035	0.538719	0.492818	0.398565	0.201926	-0.0138082	-0.210128	-0.354001	-0.415774	-0.437664	-0.341758	-0.23199	-0.110322	0.0359088	0.188981	0.298855	0.352517	0.357865	0.361072	0.368585	0.340115	0.307613
-0.18254	-0.140451	-0.13294	-0.154673	-0.122251	0.00921226	0.177864	0.272243	0.233516	0.0864145	-0.102873	-0.2997	-0.434708	-0.548915	-0.59942	-0.628058	-0.609544	-0.603202	-0.611588	-0.650503	-0.711897	-0.720826	-0.655688	-0.556754	-0.523725	-0.583561	-0.711621	-0.898145	-0.996061	-0.970791	-0.796674	-0.526491	-0.250963	-0.0564037	0.0217145	0.0716883	0.125609	0.225049	0.292486	0.262033	0.164372	0.035742	-0.0496664	-0.0750381	-0.058448	-0.0381346	-0.0189427	-0.0479107	-0.159854	-0.279582
0.238469	0.244222	0.157915	0.0679059	0.0578705	0.122	0.240136	0.291286	0.231485	0.0695074	-0.143189	-0.332051	-0.392499	-0.290444	-0.0532325	0.284677	0.588618	0.710193	0.624316	0.358873	0.0527804	-0.14867	-0.227944	-0.189598	-0.164472	-0.239922	-0.383978	-0.599792	-0.777781	-0.923706	-0.935774	-0.89586	-0.872917	-0.810607	-0.747395	-0.628152	-0.44008	-0.199982	0.0415527	0.382545	0.654878	0.886578	0.967406	0.948856	0.836555	0.714195	0.559992	0.458683	0.301402	0.113326
-0.0667522	-0.229935	-0.337855	-0.334088	-0.28855	-0.21264	-0.184077	-0.205753	-0.284902	-0.369088	-0.466955	-0.540009	-0.557085	-0.516206	-0.442778	-0.338976	-0.252795	-0.199855	-0.199517	-0.186905	-0.150285	-0.133732	-0.156952	-0.24979	-0.398825	-0.53111	-0.57155	-0.483828	-0.259545	-0.0591664	0.0375817	0.0249334	-0.0365436	-0.0976429	-0.0271279	0.0916889	0.145733	0.0613577	-0.159394	-0.340879	-0.421443	-0.323895	-0.158174	0.00947359	0.109792	0.195605	0.297503	0.440204	0.640007	0.843036
-0.0898887	-0.281495	-0.407571	-0.43613	-0.339504	-0.112973	0.0912759	0.189892	0.177	0.114336	0.0520563	0.123933	0.245044	0.300132	0.214127	-0.0108871	-0.195876	-0.277996	-0.178564	-0.00964352	0.161241	0.263497	0.350967	0.454833	0.60029	0.803951	1.0109	1.11584	1.07734	0.966111	0.859128	0.793391	0.759446	0.773163	0.832617	0.977522	1.1366	1.25096	1.27762	1.25155	1.1171	0.855191	0.522063	0.213198	0.060692	0.0782624	0.17406	0.286063	0.302103	0.224012
-0.985309	-0.89225	-0.764143	-0.591952	-0.374039	-0.216517	-0.101557	-0.06536	-0.0700609	-0.138498	-0.193337	-0.225453	-0.253779	-0.255298	-0.214651	-0.15539	-0.0717204	-0.0157413	-0.0411614	-0.0750443	-0.0439749	0.107477	0.298091	0.423682	0.415537	0.306114	0.144347	0.0118913	-0.0616534	-0.0686491	0.0491667	0.252812	0.471166	0.65342	0.677686	0.591865	0.505615	0.536418	0.678424	0.791188	0.805426	0.646361	0.430558	0.270802	0.209961	0.156609	0.0828906	-0.0167807	-0.035891	0.076801
-0.021242	-0.0501586	-0.0142612	0.0738757	0.207703	0.282185	0.284933	0.289201	0.264758	0.225928	0.18251	0.111766	0.0247485	-0.0398093	-0.0590111	-0.0248869	0.0291759	0.0632809	0.0182305	-0.125015	-0.339085	-0.585505	-0.757283	-0.748965	-0.581997	-0.358025	-0.263427	-0.396203	-0.653608	-0.936531	-1.11637	-1.13556	-1.09423	-1.10373	-1.16554	-1.23319	-1.18153	-0.960541	-0.631323	-0.263614	-0.0323018	0.0778631	0.098305	0.133099	0.221456	0.38458	0.484321	0.465275	0.361821	0.194902
-0.227562	-0.131817	-0.0489946	0.0198317	0.0604246	0.0101161	-0.135868	-0.35403	-0.605161	-0.780221	-0.771745	-0.601585	-0.373331	-0.276926	-0.41224	-0.674565	-0.962896	-1.14618	-1.16573	-1.12361	-1.13329	-1.19628	-1.26523	-1.21258	-0.987365	-0.651854	-0.277116	-0.0413822	0.0708886	0.0917212	0.127181	0.217226	0.383469	0.485116	0.465706	0.360275	0.190165	-0.000112266	-0.185917	-0.295195	-0.305823	-0.278104	-0.25886	-0.274664	-0.370536	-0.515493	-0.611147	-0.665019	-0.696365	-0.637622
0.052386	-0.147378	-0.385512	-0.632933	-0.844602	-1.0104	-1.11011	-1.15754	-1.19464	-1.2085	-1.18257	-1.07214	-0.935398	-0.800804	-0.623957	-0.416758	-0.224329	-0.0695127	-0.0372347	-0.0823935	-0.163262	-0.22879	-0.244095	-0.249054	-0.296366	-0.400602	-0.499968	-0.527573	-0.423584	-0.274807	-0.185797	-0.21275	-0.360466	-0.549043	-0.680902	-0.696216	-0.613782	-0.502231	-0.443959	-0.380802	-0.374814	-0.324343	-0.21987	-0.0736498	0.0535325	0.100269	0.110145	0.11156	0.120303	0.107023
0.794979	0.737563	0.594594	0.372416	0.106195	-0.100445	-0.228925	-0.248316	-0.194778	-0.137418	-0.137754	-0.123307	-0.139316	-0.163137	-0.246239	-0.29462	-0.29634	-0.229925	-0.108331	-0.0503227	-0.0643021	-0.195601	-0.382592	-0.602793	-0.786601	-0.881699	-0.898546	-0.83853	-0.766843	-0.654582	-0.471064	-0.197396	0.102595	0.357863	0.565127	0.682967	0.754954	0.742154	0.723393	0.673339	0.569355	0.433417	0.29369	0.172693	0.127993	0.167706	0.25951	0.346985	0.32922	0.162071
0.103069	0.318993	0.518572	0.638668	0.632573	0.515988	0.342457	0.208367	0.120157	0.185688	0.342565	0.481703	0.543562	0.467634	0.313003	0.109557	-0.00802222	-0.00642397	0.106807	0.241443	0.371454	0.444368	0.418195	0.366721	0.269255	0.168812	0.14792	0.201045	0.266144	0.321731	0.312833	0.18479	0.0614941	0.00672685	0.10082	0.383762	0.771749	1.20833	1.56327	1.70083	1.60533	1.39656	1.13235	0.859139	0.607732	0.451342	0.346852	0.281594	0.14132	-0.0705016
0.398072	0.466447	0.504808	0.541214	0.533633	0.54015	0.558834	0.624774	0.656933	0.617662	0.505609	0.339653	0.227438	0.153642	0.218059	0.356189	0.536991	0.644685	0.679916	0.617261	0.437618	0.1945	-0.0421185	-0.17823	-0.220907	-0.192512	-0.198236	-0.251632	-0.319728	-0.35548	-0.296358	-0.197294	-0.189863	-0.310186	-0.500628	-0.655709	-0.735012	-0.715781	-0.588001	-0.395461	-0.230424	-0.123289	-0.118294	-0.251739	-0.380429	-0.468178	-0.446325	-0.314141	-0.159619	-0.0022185
-0.574567	-0.439376	-0.229951	-3.85708e-05	0.182116	0.288722	0.324059	0.412577	0.535996	0.648158	0.627828	0.469186	0.288491	0.220766	0.293404	0.420372	0.483006	0.531551	0.507906	0.542592	0.59157	0.657699	0.676786	0.700125	0.73956	0.816348	0.853875	0.814642	0.729165	0.611407	0.526648	0.459068	0.458238	0.499949	0.587757	0.701667	0.82105	0.887086	0.888973	0.808541	0.619405	0.404028	0.251507	0.240996	0.373109	0.551898	0.702768	0.801173	0.808862	0.710131
-1.08353	-0.828991	-0.538004	-0.330849	-0.181913	-0.227297	-0.43961	-0.733064	-0.935859	-0.963154	-0.839244	-0.641281	-0.4705	-0.37535	-0.376643	-0.415837	-0.461335	-0.481489	-0.441154	-0.342057	-0.232172	-0.0849412	0.0496204	0.201719	0.253148	0.194414	0.0252835	-0.220916	-0.433339	-0.53595	-0.435399	-0.155773	0.125138	0.299251	0.413228	0.514803	0.609474	0.728927	0.76527	0.644967	0.372224	0.0974306	-0.112866	-0.167813	-0.145976	-0.134491	-0.0927357	-0.0387074	-0.0164725	-0.11216
0.13442	0.370876	0.528907	0.613887	0.676307	0.760596	0.856508	0.977526	1.01434	0.892465	0.616149	0.337756	0.124704	0.0690373	0.0911609	0.102796	0.145098	0.199834	0.222361	0.125419	-0.0665984	-0.271364	-0.363204	-0.329948	-0.164576	0.10895	0.391406	0.670242	0.76743	0.761517	0.582479	0.311941	0.0414326	-0.149848	-0.200476	-0.109235	-0.0234016	-0.000390831	-0.0651336	-0.240085	-0.48302	-0.690276	-0.827671	-0.82709	-0.725628	-0.536903	-0.331801	-0.167564	-0.0917333	-0.0866001
0.184297	0.013365	-0.136532	-0.241811	-0.255933	-0.165237	-0.0898412	-0.0696286	-0.126498	-0.280175	-0.493568	-0.675621	-0.796308	-0.795798	-0.706674	-0.540898	-0.360738	-0.216473	-0.149864	-0.145355	-0.155042	-0.180374	-0.228099	-0.316555	-0.393846	-0.377098	-0.304756	-0.286856	-0.416946	-0.668136	-0.881552	-0.947974	-0.860684	-0.708852	-0.588926	-0.506911	-0.401659	-0.266561	-0.0760685	0.132673	0.205202	0.114765	-0.0960736	-0.368254	-0.54874	-0.617583	-0.628908	-0.579913	-0.596215	-0.585551
0.414327	0.254234	0.0548473	-0.115527	-0.241442	-0.21824	-0.143602	-0.0672003	-0.0204081	0.0227288	0.00121462	-0.00859707	-0.0270725	-0.0481819	-0.0889207	-0.137744	-0.238382	-0.368545	-0.408805	-0.344613	-0.140425	0.0593333	0.199514	0.200543	0.0840865	-0.0786663	-0.187902	-0.210942	-0.176461	-0.0589286	0.0391812	0.0704826	-0.0328102	-0.20844	-0.355154	-0.411536	-0.340881	-0.19788	-0.0333861	0.0796093	0.136199	0.202729	0.256679	0.301035	0.295706	0.204821	0.0118441	-0.166004	-0.234308	-0.137508
0.835109	0.807196	0.731695	0.626642	0.557595	0.545117	0.543921	0.53927	0.544635	0.589915	0.62978	0.722143	0.935294	1.14054	1.23556	1.08406	0.739097	0.304045	-0.0393468	-0.225864	-0.283725	-0.242566	-0.169808	-0.07015	-0.0179524	-0.00779038	-0.0303823	-0.039704	-0.0174481	0.0502684	0.142533	0.239387	0.297666	0.331434	0.344195	0.369972	0.386657	0.345191	0.230691	0.0528287	-0.0967004	-0.20463	-0.191984	-0.0404631	0.147837	0.38398	0.545645	0.594638	0.503979	0.358562
0.25702	0.295976	0.342016	0.392076	0.460079	0.532202	0.542527	0.521414	0.457823	0.34561	0.224901	0.137957	0.174213	0.35692	0.631812	0.934945	1.1989	1.3407	1.40293	1.42457	1.485	1.64716	1.87156	2.04713	2.10793	1.98048	1.75016	1.55074	1.46316	1.45752	1.45217	1.43616	1.35424	1.28966	1.25494	1.23691	1.16138	1.14167	1.17567	1.25542	1.31175	1.25541	1.0492	0.726649	0.383332	0.156231	0.0260019	0.0222947	0.106019	0.231632
-0.12505	-0.273221	-0.380182	-0.418396	-0.385159	-0.322931	-0.284812	-0.302699	-0.29688	-0.279628	-0.234568	-0.201001	-0.142838	-0.105607	-0.0712243	-0.154141	-0.308096	-0.472919	-0.553504	-0.540395	-0.472952	-0.408248	-0.4043	-0.372904	-0.358576	-0.342828	-0.410738	-0.521148	-0.621	-0.680269	-0.703173	-0.726804	-0.807935	-0.93431	-1.02007	-1.10223	-1.13912	-1.14034	-1.14361	-1.18041	-1.242	-1.29932	-1.2599	-1.1967	-1.19205	-1.20055	-1.19977	-1.1706	-1.10958	-1.05402
0.915676	0.82298	0.724109	0.596716	0.468258	0.31981	0.123931	-0.0473095	-0.234317	-0.359249	-0.383937	-0.267518	-0.0830739	0.132557	0.28187	0.352115	0.430855	0.52734	0.702888	0.883821	1.00307	0.972951	0.813587	0.566363	0.318657	0.0931013	-0.0890657	-0.143269	-0.0634644	0.133748	0.339753	0.538976	0.629045	0.594644	0.474131	0.355395	0.316409	0.376672	0.460391	0.543237	0.62547	0.713061	0.790779	0.852727	0.878451	0.814456	0.672816	0.484636	0.347806	0.328307
0.72427	0.876634	0.933379	0.905483	0.75092	0.540074	0.312536	0.116302	0.0338018	0.0373169	0.0997845	0.157047	0.246392	0.364752	0.414769	0.331998	0.157298	-0.0699854	-0.247719	-0.3139	-0.224744	-0.0286437	0.248922	0.548534	0.796607	0.946788	0.951433	0.83518	0.659598	0.489188	0.366646	0.325301	0.333647	0.3245	0.304613	0.322805	0.3715	0.453775	0.560317	0.64375	0.707983	0.754288	0.784489	0.758657	0.725197	0.697951	0.697415	0.795105	0.944415	1.10849
1.70385	1.65815	1.56164	1.35603	1.10002	0.816967	0.607859	0.443253	0.311942	0.236284	0.193733	0.134845	0.101019	0.111616	0.228518	0.358879	0.434856	0.414003	0.292366	0.121589	-0.0489516	-0.134305	-0.197143	-0.237054	-0.287763	-0.368807	-0.472286	-0.555716	-0.642785	-0.72359	-0.826823	-0.93173	-0.926826	-0.83396	-0.689354	-0.534783	-0.446737	-0.435196	-0.469054	-0.493465	-0.440163	-0.32891	-0.112791	0.179339	0.458468	0.598984	0.609389	0.51745	0.362991	0.149674
0.0872468	0.151112	0.240706	0.314485	0.356755	0.351817	0.259572	0.1474	0.121647	0.177515	0.292337	0.410717	0.466424	0.487384	0.474012	0.465583	0.517946	0.584202	0.603128	0.547051	0.314981	-0.0364059	-0.408409	-0.712819	-0.822102	-0.773657	-0.605097	-0.45873	-0.388458	-0.395633	-0.431138	-0.454107	-0.399438	-0.292255	-0.204234	-0.145949	-0.087395	0.0433267	0.176853	0.328863	0.417977	0.368519	0.158992	-0.125299	-0.405349	-0.601072	-0.695876	-0.670644	-0.596574	-0.435589
0.597044	0.739394	0.900455	1.0298	1.10684	1.12681	1.1572	1.2059	1.30241	1.39157	1.44469	1.41438	1.34556	1.19827	1.02397	0.845447	0.707058	0.608422	0.502432	0.410922	0.308215	0.239042	0.209016	0.328305	0.520582	0.629064	0.578604	0.331834	-0.049201	-0.381027	-0.602529	-0.661721	-0.675532	-0.689637	-0.708954	-0.654769	-0.508812	-0.192337	0.190855	0.546312	0.83679	1.01758	1.07804	1.1697	1.27836	1.31423	1.23785	1.03634	0.793113	0.54298
0.197937	0.243124	0.268549	0.262405	0.18597	0.0003237	-0.298522	-0.549693	-0.636193	-0.55333	-0.326679	-0.0237537	0.255822	0.447936	0.54951	0.5433	0.464677	0.337292	0.206889	0.0433058	-0.131818	-0.211108	-0.151513	0.0446327	0.291846	0.540893	0.689755	0.668296	0.504238	0.303201	0.117982	-0.0258439	-0.0678785	-0.074225	-0.096815	-0.158096	-0.251658	-0.330173	-0.327031	-0.236685	-0.115047	-0.0412012	-0.051501	-0.109019	-0.122165	-0.140612	-0.167433	-0.132514	-0.0312461	0.160768
0.758032	0.595348	0.384439	0.173163	-0.0309003	-0.183313	-0.303648	-0.384001	-0.415516	-0.394941	-0.306241	-0.146664	0.0885192	0.233	0.249745	0.132223	-0.0551771	-0.248608	-0.336515	-0.333228	-0.338935	-0.434742	-0.615771	-0.900856	-1.20438	-1.42589	-1.44976	-1.28076	-0.950834	-0.58862	-0.297671	-0.176289	-0.212597	-0.297645	-0.396542	-0.385013	-0.31877	-0.264281	-0.204751	-0.165239	-0.125262	-0.0856505	-0.041376	0.00471898	0.0137801	-0.0576259	-0.229521	-0.37714	-0.436592	-0.388523
0.0368094	0.096428	0.0951392	0.0257299	-0.138814	-0.309247	-0.437767	-0.504418	-0.496824	-0.432298	-0.342068	-0.246471	-0.235824	-0.290474	-0.366963	-0.410566	-0.398241	-0.352962	-0.332827	-0.333279	-0.383988	-0.496872	-0.586295	-0.606904	-0.562955	-0.48564	-0.359689	-0.196915	0.0136427	0.251417	0.456781	0.586805	0.61075	0.564565	0.475186	0.430198	0.415816	0.416492	0.428257	0.438594	0.440931	0.457532	0.463305	0.500755	0.542632	0.566004	0.532125	0.450258	0.340583	0.269369
-0.861969	-0.70604	-0.542118	-0.369774	-0.245871	-0.141438	-0.105232	-0.093475	-0.106784	-0.128346	-0.128561	-0.07774	-0.0705396	-0.0714308	-0.111114	-0.241677	-0.513879	-0.87712	-1.19911	-1.40578	-1.38261	-1.19189	-0.860578	-0.587945	-0.444424	-0.421788	-0.483318	-0.574378	-0.619985	-0.509175	-0.317483	-0.139118	-0.10673	-0.161555	-0.261795	-0.354646	-0.312318	-0.214742	-0.0675997	0.079978	0.18983	0.263833	0.26299	0.174333	0.0245943	-0.118503	-0.195475	-0.242566	-0.315844	-0.473121
-0.274444	-0.213148	-0.0821085	0.0754667	0.273954	0.521846	0.798477	1.03148	1.17192	1.11986	0.932218	0.659426	0.453159	0.363713	0.419099	0.538379	0.707808	0.88676	1.07656	1.19326	1.20808	1.10675	0.94158	0.751871	0.576817	0.495036	0.498624	0.50476	0.488596	0.454144	0.475636	0.637566	0.881745	1.10575	1.23545	1.16935	0.99186	0.800022	0.675974	0.709038	0.938975	1.25659	1.49215	1.607	1.58486	1.46036	1.2807	1.20172	1.31468	1.53791
1.30595	1.16274	1.01649	0.83871	0.634752	0.460107	0.386424	0.451418	0.58091	0.73206	0.826405	0.7807	0.614807	0.301342	-0.0897884	-0.411349	-0.583521	-0.58324	-0.448303	-0.320164	-0.219112	-0.144026	-0.109999	-0.070334	-0.0749435	-0.203638	-0.443222	-0.769856	-1.01566	-1.09906	-0.991197	-0.747723	-0.490565	-0.35789	-0.3948	-0.540743	-0.701747	-0.851632	-0.930851	-0.915022	-0.829552	-0.696237	-0.483891	-0.309032	-0.163695	-0.0909841	-0.0411963	0.0189715	0.00495686	-0.0341922
-0.375597	-0.356526	-0.382465	-0.506397	-0.714593	-0.935339	-1.04349	-0.968139	-0.794201	-0.576909	-0.338289	-0.19653	-0.169892	-0.154776	-0.139144	-0.0935253	-0.0108425	0.077793	0.195135	0.354404	0.563931	0.742975	0.882318	0.924296	0.860843	0.734355	0.532246	0.407868	0.364429	0.472619	0.678851	0.899809	1.01202	0.975829	0.845821	0.774777	0.877821	1.05327	1.2033	1.1871	1.0037	0.746529	0.472713	0.258348	0.127588	0.0576181	0.0483393	0.115082	0.190689	0.221083
0.284678	0.119232	0.0583247	0.0471454	0.0816984	0.161768	0.247497	0.360991	0.515036	0.717691	0.890863	1.02564	1.06624	1.00487	0.882526	0.687045	0.566747	0.524732	0.629374	0.828842	1.04255	1.15109	1.11608	0.990336	0.921622	1.02129	1.19098	1.33609	1.32043	1.14304	0.8943	0.629465	0.422131	0.295659	0.227984	0.219009	0.283563	0.35669	0.386087	0.397734	0.424712	0.547867	0.772665	1.02125	1.04584	0.846998	0.436433	0.0490522	-0.0910953	-0.0193146
1.11631	0.944799	0.79461	0.749793	0.860435	1.03935	1.18148	1.16614	0.992396	0.748776	0.489389	0.28632	0.162451	0.0961677	0.0873778	0.150604	0.222226	0.251018	0.262426	0.288848	0.40947	0.629643	0.873118	0.897194	0.702447	0.300328	-0.0790823	-0.216347	-0.146043	0.0631563	0.286803	0.436454	0.499434	0.468156	0.405991	0.37273	0.432032	0.532479	0.731248	0.952631	1.13404	1.26224	1.26015	1.16268	0.972617	0.845664	0.797539	0.831646	0.894003	0.92433
0.596565	0.498798	0.398192	0.298437	0.184862	0.113342	0.0937571	0.0836893	-0.0364185	-0.256577	-0.503772	-0.66729	-0.707816	-0.566541	-0.339257	-0.139777	-0.0266421	0.0522992	0.119809	0.164326	0.202864	0.238165	0.261012	0.309704	0.44034	0.579512	0.702299	0.669844	0.554762	0.388938	0.240364	0.129101	0.0973338	0.0914291	0.0260372	-0.086152	-0.183085	-0.310244	-0.453327	-0.594592	-0.776412	-0.906675	-0.954212	-0.871583	-0.670994	-0.46906	-0.333295	-0.229317	-0.141343	-0.118724
-0.940539	-0.788184	-0.538797	-0.277666	-0.0699376	0.0449208	0.127813	0.198702	0.245447	0.285914	0.322982	0.346972	0.398102	0.535276	0.681414	0.810347	0.776267	0.655425	0.481302	0.325291	0.208459	0.175102	0.168902	0.100237	-0.0175677	-0.119352	-0.252876	-0.40312	-0.551456	-0.742377	-0.87916	-0.929075	-0.842311	-0.631682	-0.419641	-0.27708	-0.167898	-0.0755206	-0.0517704	-0.0397301	0.0331298	0.135124	0.274474	0.40283	0.43356	0.442677	0.419954	0.407036	0.457375	0.4806
0.410888	0.419356	0.458022	0.462601	0.479572	0.470409	0.44073	0.314332	0.0804715	-0.17547	-0.391032	-0.395265	-0.236889	0.0106721	0.142153	0.0848593	-0.104831	-0.355987	-0.543003	-0.543876	-0.345855	-0.0163834	0.295166	0.430222	0.363769	0.104086	-0.251509	-0.572486	-0.77074	-0.876718	-0.895753	-0.825456	-0.662147	-0.398911	-0.110887	0.136507	0.19888	0.145247	0.060072	0.0571336	0.07484	0.0358801	-0.0179066	-0.0910133	-0.0913996	0.0620634	0.296989	0.455171	0.47425	0.350071
-0.413098	-0.363199	-0.253487	-0.0545904	0.186614	0.440875	0.575969	0.520569	0.299131	-0.0540791	-0.452547	-0.792435	-0.981623	-0.997473	-0.928245	-0.789325	-0.565997	-0.285983	-0.0155706	0.173071	0.287832	0.321185	0.337027	0.387932	0.503143	0.65876	0.733784	0.770462	0.790537	0.849649	0.932233	1.05838	1.17276	1.21334	1.17483	1.08755	1.01396	0.999291	1.06997	1.12389	1.11134	1.02015	0.978842	0.984269	0.97423	0.886759	0.636188	0.310815	0.0129692	-0.15741
0.332457	0.27835	0.223983	0.154902	0.166395	0.252391	0.365882	0.363714	0.168808	-0.186163	-0.536528	-0.756055	-0.802272	-0.642818	-0.403722	-0.154308	0.0730382	0.281914	0.451741	0.543821	0.599801	0.669643	0.715082	0.726656	0.735906	0.807375	0.908006	1.01791	1.08156	1.05662	0.945757	0.768026	0.59601	0.446706	0.393849	0.428312	0.510867	0.59458	0.653427	0.6623	0.604075	0.583872	0.578645	0.62505	0.629549	0.581773	0.499421	0.45886	0.510715	0.550403
-0.19644	-0.529521	-0.777822	-0.914777	-0.912866	-0.736207	-0.491426	-0.236082	-0.00333035	0.210512	0.384377	0.478646	0.535957	0.607459	0.653979	0.665828	0.675297	0.748466	0.851489	0.964011	1.02917	1.00363	0.890138	0.708182	0.532075	0.379222	0.325108	0.36039	0.444908	0.530611	0.590857	0.599942	0.540332	0.519649	0.514297	0.561805	0.566412	0.5175	0.43319	0.391665	0.444753	0.485384	0.54567	0.611024	0.666051	0.707565	0.723012	0.718559	0.674354	0.574696
0.45268	0.475821	0.415641	0.350013	0.252991	0.161604	0.052627	-0.0294356	-0.113708	-0.171555	-0.244734	-0.274628	-0.242382	-0.144053	0.00319783	0.110068	0.181787	0.208876	0.25678	0.277019	0.306702	0.239881	0.132607	0.027608	0.00864979	0.0372781	0.00455616	-0.0847604	-0.199075	-0.265795	-0.362094	-0.393501	-0.455789	-0.556412	-0.689677	-0.763359	-0.764871	-0.717799	-0.64994	-0.575631	-0.442015	-0.264671	-0.0347436	0.142987	0.245724	0.252527	0.192051	0.149885	0.228879	0.350818
-0.799371	-0.735818	-0.625979	-0.402233	-0.115869	0.196353	0.442623	0.57307	0.556556	0.39076	0.11671	-0.159666	-0.310819	-0.361908	-0.362958	-0.355787	-0.360204	-0.385984	-0.426948	-0.47105	-0.465001	-0.345927	-0.155951	0.0380373	0.172488	0.152594	-0.000279039	-0.224362	-0.474556	-0.640488	-0.647076	-0.555149	-0.37348	-0.260788	-0.258665	-0.382602	-0.59302	-0.796679	-0.900376	-0.85351	-0.652393	-0.286119	0.105378	0.446072	0.624205	0.690176	0.663098	0.600435	0.506767	0.434883
0.683594	0.601374	0.460183	0.260882	0.0881388	0.0586721	0.204524	0.440493	0.656967	0.735914	0.679729	0.546067	0.403223	0.357311	0.343164	0.369251	0.412803	0.44463	0.441637	0.450933	0.443228	0.470548	0.511367	0.540893	0.551356	0.507856	0.469893	0.487299	0.538453	0.633128	0.709067	0.745506	0.765919	0.778529	0.800303	0.792937	0.695154	0.567833	0.408542	0.279025	0.223579	0.222037	0.23074	0.219135	0.204604	0.267338	0.378429	0.545065	0.621107	0.593394
0.781314	0.689621	0.556145	0.435792	0.367731	0.386213	0.423487	0.421041	0.381766	0.257222	0.0637339	-0.174805	-0.411424	-0.582704	-0.639916	-0.628791	-0.576571	-0.49822	-0.389037	-0.217422	-0.0475174	0.11976	0.253165	0.371149	0.467671	0.517864	0.502398	0.408156	0.278754	0.201839	0.21964	0.271881	0.233975	0.0934305	-0.16135	-0.420819	-0.605314	-0.716673	-0.783111	-0.806488	-0.821145	-0.819779	-0.834522	-0.822542	-0.864988	-0.939315	-0.913848	-0.786458	-0.528838	-0.28143
0.309505	0.134278	-0.0719454	-0.237727	-0.374157	-0.498659	-0.555734	-0.54764	-0.4932	-0.444855	-0.388589	-0.351678	-0.290593	-0.294378	-0.368384	-0.504728	-0.62926	-0.697134	-0.689852	-0.578964	-0.413398	-0.175521	0.11723	0.457749	0.732406	0.877736	0.872052	0.806026	0.782613	0.771022	0.705367	0.519516	0.297141	0.115904	0.0383535	0.0975063	0.235929	0.378044	0.473984	0.504543	0.497579	0.46114	0.368202	0.266036	0.187758	0.179136	0.267661	0.424789	0.486647	0.441506
0.606321	0.745149	0.838855	0.852143	0.67836	0.459563	0.234929	0.10087	0.12946	0.208645	0.294226	0.342271	0.348081	0.416138	0.539762	0.68219	0.76753	0.774693	0.713995	0.698325	0.757176	0.854391	0.940214	0.90816	0.795739	0.628205	0.476774	0.395346	0.404116	0.463736	0.478638	0.37909	0.252886	0.231877	0.326988	0.572368	0.7961	0.916725	0.894265	0.692826	0.464791	0.322465	0.2984	0.323334	0.37797	0.411877	0.435971	0.48111	0.49597	0.477244
-0.0898411	-0.112416	-0.103833	0.00468209	0.110452	0.199045	0.246421	0.25215	0.319258	0.441159	0.581602	0.665752	0.672815	0.612963	0.597512	0.655543	0.751402	0.836029	0.804421	0.693567	0.528369	0.379049	0.298756	0.307403	0.366192	0.380887	0.282727	0.158281	0.137565	0.231351	0.47331	0.693924	0.812868	0.790721	0.592089	0.367233	0.226891	0.203161	0.227748	0.281621	0.315056	0.338814	0.383324	0.397977	0.379512	0.308047	0.227354	0.120341	-0.00336689	-0.154529
-0.0573983	-0.193319	-0.240186	-0.204891	-0.155475	-0.0972816	-0.0629482	-0.0385515	0.00715444	0.0222011	0.00323973	-0.0701455	-0.153007	-0.262896	-0.389929	-0.545154	-0.671159	-0.86808	-1.11069	-1.35873	-1.57492	-1.6757	-1.61963	-1.38855	-1.06583	-0.740049	-0.487976	-0.300346	-0.174984	-0.0999248	-0.0271901	0.0216982	-0.0104296	-0.0595533	-0.134294	-0.164176	-0.147226	-0.148664	-0.170589	-0.250642	-0.315506	-0.318577	-0.298904	-0.247521	-0.158976	-0.0237218	0.133004	0.252929	0.318561	0.292632
-1.44458	-1.2516	-1.08306	-0.913475	-0.787737	-0.716676	-0.639443	-0.5537	-0.382058	-0.154277	-0.00183684	0.0397018	-0.032604	-0.176394	-0.238524	-0.177394	-0.0469092	0.0301494	-0.0311099	-0.221323	-0.495189	-0.801039	-1.08267	-1.32464	-1.42411	-1.36975	-1.17548	-0.871541	-0.590235	-0.402538	-0.280492	-0.157086	-0.0797825	-0.0569109	-0.104528	-0.10986	-0.0769183	-0.0270631	0.0364929	-0.000304875	-0.0999583	-0.182035	-0.17532	-0.143127	-0.105163	-0.109398	-0.107218	-0.0303835	0.0880741	0.260961
-0.515165	-0.526404	-0.545584	-0.514595	-0.442175	-0.270292	-0.0314726	0.128356	0.171908	0.0960975	-0.0546612	-0.119802	-0.05571	0.081099	0.161892	0.0976641	-0.101767	-0.388906	-0.709578	-1.00486	-1.25856	-1.36284	-1.30585	-1.10217	-0.783497	-0.488558	-0.291765	-0.163804	-0.0344174	0.0466326	0.0706126	0.0206876	0.0150971	0.0496356	0.101907	0.168543	0.129962	0.025479	-0.0605754	-0.0535348	-0.0197814	0.0200219	0.0155816	0.017868	0.0984257	0.222624	0.40389	0.554548	0.612549	0.565358
0.128454	0.187077	0.269556	0.328616	0.34074	0.294622	0.212139	0.119803	0.0408354	0.0216807	0.0703432	0.167122	0.218638	0.169075	0.0662867	-0.0487247	-0.080369	0.0145209	0.194628	0.401052	0.564177	0.629337	0.629437	0.587237	0.562933	0.578423	0.634731	0.660118	0.671342	0.605898	0.496193	0.41305	0.39175	0.451626	0.54416	0.643838	0.74123	0.817571	0.773764	0.639767	0.426583	0.268941	0.155162	0.17085	0.273895	0.396578	0.435121	0.374822	0.322342	0.310044
0.296853	0.092995	-0.164254	-0.326961	-0.456541	-0.411482	-0.256022	-0.0709342	-0.0127846	-0.103756	-0.182931	-0.201485	-0.160326	-0.180132	-0.251661	-0.377632	-0.398335	-0.262985	0.00616915	0.296997	0.442242	0.422991	0.380086	0.394644	0.506554	0.605339	0.607972	0.600837	0.550604	0.518167	0.39444	0.200958	-0.0296901	-0.260633	-0.419857	-0.492087	-0.486068	-0.586352	-0.616403	-0.536354	-0.254955	0.0610408	0.326437	0.404448	0.22159	-0.162826	-0.617402	-1.06844	-1.35804	-1.4776
0.0204955	0.289381	0.493357	0.566467	0.515978	0.466032	0.479125	0.579771	0.668614	0.670982	0.664566	0.619388	0.590216	0.478942	0.304933	0.0974982	-0.110201	-0.2534	-0.318361	-0.312948	-0.403138	-0.430165	-0.358172	-0.105095	0.179097	0.417783	0.487942	0.323488	-0.0222378	-0.431063	-0.836706	-1.09716	-1.20469	-1.16515	-1.03402	-0.888078	-0.651568	-0.302706	0.145066	0.587666	0.880098	1.00088	1.02593	1.0021	0.962671	0.831487	0.537672	0.167543	-0.152683	-0.296635
-0.156839	-0.407094	-0.653802	-0.927098	-1.09913	-1.17557	-1.14238	-1.0323	-0.909783	-0.711236	-0.418371	-0.042473	0.329083	0.574575	0.675971	0.696999	0.676997	0.643894	0.533767	0.287114	-0.023604	-0.292429	-0.413275	-0.433073	-0.483123	-0.66729	-0.96305	-1.23365	-1.33427	-1.2197	-0.976122	-0.719393	-0.478151	-0.272039	-0.0824351	0.0945486	0.192746	0.16833	0.058551	-0.0763169	-0.0807712	0.0167685	0.200667	0.388732	0.476708	0.481302	0.5027	0.523568	0.52159	0.425855
-0.0566158	-0.216341	-0.469158	-0.772091	-1.02028	-1.10955	-1.00766	-0.791041	-0.562725	-0.348183	-0.164883	0.00373647	0.161132	0.248462	0.226747	0.129119	0.0091775	0.0052162	0.0919606	0.255506	0.422757	0.500996	0.505081	0.524111	0.542669	0.540911	0.455771	0.333743	0.186574	0.0577134	-0.0406431	-0.101324	-0.140754	-0.212298	-0.334006	-0.507066	-0.700511	-0.86402	-0.900256	-0.793333	-0.608214	-0.471801	-0.446971	-0.431731	-0.4495	-0.457326	-0.38909	-0.319551	-0.295604	-0.358794
-1.01038	-1.03897	-0.966695	-0.792641	-0.575933	-0.425789	-0.399272	-0.382997	-0.401974	-0.410331	-0.337459	-0.263196	-0.237621	-0.305105	-0.446484	-0.602849	-0.674299	-0.639481	-0.529399	-0.385344	-0.303026	-0.246291	-0.240382	-0.317186	-0.40508	-0.464027	-0.464274	-0.378379	-0.272253	-0.179547	-0.0633178	0.0192862	0.0855118	0.153345	0.161626	0.158462	0.131854	0.109418	0.0940268	0.0352375	-0.0494579	-0.0737407	-0.102532	-0.156997	-0.246188	-0.3416	-0.43059	-0.464088	-0.396365	-0.241927
0.0428438	-0.0058137	0.00975292	0.00124425	-0.042862	-0.135435	-0.236415	-0.330597	-0.36605	-0.294375	-0.130926	0.10761	0.329272	0.501824	0.581981	0.607034	0.541813	0.534062	0.577714	0.701267	0.842621	0.951032	0.952814	0.86788	0.673689	0.470611	0.395426	0.474216	0.695996	0.960054	1.15518	1.18766	1.05004	0.801294	0.519947	0.252071	0.0105438	-0.168294	-0.346226	-0.522774	-0.640603	-0.668961	-0.609365	-0.516799	-0.360312	-0.192653	-0.0869238	0.0464983	0.255577	0.493784
-0.114507	-0.250256	-0.303376	-0.241718	-0.0932119	0.133165	0.351108	0.520765	0.599578	0.624211	0.560084	0.552463	0.595383	0.716863	0.855846	0.962438	0.96419	0.880681	0.689748	0.490076	0.416153	0.493621	0.71168	0.971309	1.16316	1.1951	1.05978	0.815212	0.538585	0.275202	0.0377263	-0.138111	-0.313059	-0.486645	-0.602498	-0.63038	-0.571784	-0.48077	-0.326909	-0.162062	-0.0581062	0.0730777	0.27865	0.51286	0.690235	0.765064	0.760366	0.671226	0.448788	0.215973
1.24386	1.21189	1.19827	1.12332	1.00353	0.792997	0.58151	0.503213	0.585265	0.816227	1.09122	1.29442	1.32825	1.18493	0.925885	0.632889	0.353923	0.102395	-0.0838471	-0.269147	-0.453004	-0.575712	-0.605244	-0.543181	-0.446782	-0.283816	-0.109215	0.000891684	0.139838	0.357574	0.605643	0.793512	0.87277	0.867794	0.773379	0.537779	0.291188	0.0879828	-0.0674303	-0.132668	-0.113204	0.0428361	0.265347	0.497731	0.66679	0.704957	0.48816	0.100169	-0.32621	-0.570055
0.672845	0.576674	0.427771	0.185095	-0.0487728	-0.245883	-0.392275	-0.453726	-0.435392	-0.288409	-0.078814	0.140081	0.299327	0.335278	0.131066	-0.234404	-0.636034	-0.865724	-0.83966	-0.625499	-0.409871	-0.315361	-0.327703	-0.332062	-0.252879	-0.107938	0.103303	0.299917	0.461405	0.516417	0.450605	0.21123	-0.11216	-0.36497	-0.481613	-0.507651	-0.517674	-0.538457	-0.54099	-0.48794	-0.310453	0.0248776	0.450294	0.814716	1.01397	1.02725	0.898298	0.649486	0.384172	0.177602
0.528819	0.516626	0.464839	0.385908	0.213809	-0.00997626	-0.306096	-0.549555	-0.692844	-0.759241	-0.741965	-0.635384	-0.476825	-0.265995	-0.0747243	0.0290314	0.0865814	0.164959	0.21195	0.255967	0.297354	0.328873	0.373521	0.438219	0.544096	0.589217	0.520781	0.387331	0.22321	0.117659	0.0680247	0.0796725	0.064791	0.0148483	-0.0098243	0.08492	0.200285	0.307069	0.392301	0.4225	0.418851	0.383982	0.305838	0.232542	0.165552	0.0926194	0.000312579	-0.233415	-0.526286	-0.898421
0.24001	0.280774	0.347378	0.325456	0.26033	0.07583	-0.132249	-0.238399	-0.206548	-0.0550423	0.0643575	0.0999361	0.0270368	-0.0133043	-0.0050404	0.115855	0.258912	0.303852	0.192838	-0.0435292	-0.281679	-0.442786	-0.523147	-0.481179	-0.45128	-0.490345	-0.631569	-0.763474	-0.831922	-0.796559	-0.673354	-0.492573	-0.287657	-0.0764406	0.111853	0.252243	0.399219	0.529753	0.626013	0.69026	0.686265	0.543371	0.361108	0.168841	0.0954121	0.119387	0.194565	0.347702	0.50081	0.610231
0.228056	0.215665	0.171385	0.0698533	0.01899	0.0336907	0.148634	0.284648	0.327375	0.221826	-0.00290318	-0.229328	-0.382503	-0.458908	-0.419006	-0.390579	-0.42772	-0.561992	-0.687403	-0.75248	-0.718859	-0.60172	-0.429839	-0.235011	-0.0341942	0.144829	0.278307	0.418047	0.542154	0.633675	0.694759	0.690961	0.555102	0.381813	0.199011	0.129198	0.151992	0.223468	0.369066	0.514636	0.61867	0.630672	0.583026	0.46306	0.360344	0.251801	0.142956	0.0271367	-0.090603	-0.20073
-1.20782	-0.91741	-0.65034	-0.42465	-0.339262	-0.340776	-0.316496	-0.147778	0.229391	0.659526	1.02451	1.21069	1.26419	1.16024	0.968174	0.723418	0.450006	0.193327	0.0578148	0.016375	0.0611801	0.108175	0.107652	0.0567915	-0.00119806	-0.0241431	0.0637684	0.252084	0.496896	0.763508	0.860727	0.819857	0.714505	0.563724	0.490914	0.532146	0.600378	0.659344	0.66134	0.592327	0.448801	0.263843	0.0247809	-0.187685	-0.349355	-0.431745	-0.349008	-0.195849	0.00103527	0.14605
0.275613	0.26968	0.339546	0.40788	0.456635	0.454319	0.389489	0.254663	0.0809165	-0.143655	-0.343242	-0.495113	-0.572508	-0.494787	-0.350911	-0.165961	-0.029736	0.02421	-0.00555028	-0.0251997	-0.0127172	0.0187341	-0.0581558	-0.208522	-0.295977	-0.307652	-0.159444	0.0657168	0.333826	0.559716	0.690046	0.695874	0.697381	0.606471	0.493126	0.350938	0.235144	0.190994	0.316681	0.641916	1.07111	1.44092	1.58985	1.5039	1.17724	0.816738	0.475142	0.271731	0.171217	0.179215
1.16739	1.03785	0.817929	0.536277	0.306174	0.168876	0.118907	0.121785	0.211011	0.308894	0.380342	0.375928	0.365967	0.321725	0.210506	0.0955698	0.0122849	-0.0332834	-0.0278811	-0.00280655	-0.0249091	-0.104993	-0.226562	-0.317045	-0.292397	-0.24602	-0.175954	-0.117102	-0.0590748	0.00844532	0.101606	0.219988	0.28926	0.365516	0.433439	0.541677	0.611168	0.622019	0.56656	0.530527	0.541995	0.587772	0.630163	0.621286	0.575441	0.472392	0.337884	0.179054	0.0123438	-0.151419
0.396841	0.100135	-0.256039	-0.514451	-0.647984	-0.584714	-0.422493	-0.240869	-0.190269	-0.278408	-0.459074	-0.651902	-0.802649	-0.855327	-0.802845	-0.667396	-0.506626	-0.338721	-0.251062	-0.221037	-0.250705	-0.370924	-0.471177	-0.604763	-0.776892	-0.901503	-0.966098	-0.92271	-0.716552	-0.39503	-0.0927741	0.105024	0.0878316	-0.102742	-0.33586	-0.427051	-0.23238	0.117786	0.474089	0.723669	0.79834	0.639373	0.351126	-0.00375996	-0.308391	-0.518918	-0.560453	-0.466121	-0.269787	-0.027823
0.421047	0.093815	-0.148314	-0.208796	-0.0145097	0.315763	0.649016	0.882451	0.952291	0.803608	0.534008	0.20208	-0.0828446	-0.279752	-0.318601	-0.230371	-0.0467376	0.179573	0.392935	0.540966	0.508092	0.311474	-0.00466764	-0.305458	-0.52294	-0.569366	-0.462065	-0.259064	-0.0281433	0.127946	0.186325	0.185375	0.229831	0.412639	0.672275	0.911778	1.04753	1.04498	0.999588	0.985602	0.996979	0.9956	0.951867	0.863358	0.846137	0.816788	0.775057	0.691721	0.559884	0.499297
0.182231	0.219521	0.303201	0.400712	0.52686	0.66584	0.808035	0.898349	0.884858	0.89545	0.92004	0.917805	0.884285	0.754124	0.605841	0.485311	0.496643	0.622524	0.779839	0.886792	0.950166	0.941693	0.913805	0.84045	0.736654	0.549097	0.287485	0.0745084	-0.0694496	-0.175581	-0.303604	-0.413197	-0.491471	-0.453665	-0.362806	-0.197599	0.0166326	0.229088	0.334826	0.269466	0.104805	-0.0610949	-0.197271	-0.190888	-0.0765918	0.0451302	0.159057	0.242752	0.246405	0.266243
0.137884	0.338511	0.52815	0.695211	0.787659	0.790762	0.8004	0.822774	0.82074	0.79024	0.671804	0.536878	0.427205	0.437516	0.552059	0.695202	0.792521	0.850186	0.842477	0.817101	0.750354	0.655908	0.485245	0.247199	0.0534072	-0.0775832	-0.174155	-0.290646	-0.390366	-0.461589	-0.427189	-0.344515	-0.194189	0.000744784	0.194062	0.290276	0.230803	0.0809742	-0.0699811	-0.193891	-0.188082	-0.0840821	0.0266753	0.13034	0.206496	0.20982	0.22787	0.205837	0.208612	0.242911
-0.414618	-0.424806	-0.44756	-0.379249	-0.258859	-0.148039	-0.0489043	0.0239243	0.0271029	0.0443646	0.0232945	0.0259476	0.0587488	0.113801	0.106718	0.0129539	-0.15261	-0.308296	-0.365752	-0.33381	-0.21228	-0.0771223	-0.00356014	0.0221104	0.0961987	0.196074	0.316155	0.410826	0.41125	0.403776	0.397252	0.343398	0.295859	0.274412	0.3089	0.357904	0.390716	0.376425	0.39713	0.438261	0.491217	0.596058	0.70351	0.783689	0.80981	0.735211	0.540676	0.244623	-0.0872224	-0.368098
0.670581	0.467588	0.326091	0.254784	0.270855	0.311038	0.346018	0.330783	0.352856	0.396704	0.453159	0.564928	0.679479	0.764956	0.792803	0.713275	0.505887	0.190272	-0.163499	-0.462933	-0.644173	-0.734413	-0.756311	-0.801611	-0.824603	-0.790719	-0.693733	-0.594937	-0.572412	-0.654487	-0.807559	-0.942915	-0.95281	-0.901537	-0.840039	-0.756279	-0.709323	-0.651967	-0.585775	-0.583971	-0.551926	-0.596917	-0.70979	-0.809431	-0.790555	-0.690765	-0.537999	-0.424659	-0.425642	-0.518887
-0.969275	-0.943558	-0.85948	-0.730654	-0.618443	-0.590224	-0.674187	-0.830778	-0.969245	-0.979368	-0.926916	-0.864004	-0.778319	-0.730283	-0.671608	-0.603895	-0.602049	-0.569268	-0.615293	-0.730761	-0.832692	-0.813383	-0.711298	-0.55502	-0.439075	-0.440081	-0.53547	-0.640385	-0.646621	-0.569678	-0.426407	-0.293736	-0.172959	-0.120485	-0.12001	-0.0719358	0.0385327	0.197538	0.351429	0.413339	0.286884	0.0934873	-0.189754	-0.383038	-0.483115	-0.546933	-0.522844	-0.514945	-0.508069	-0.517602
-0.798096	-0.809944	-0.699282	-0.549239	-0.385725	-0.267199	-0.268145	-0.357815	-0.45644	-0.462302	-0.389972	-0.25529	-0.130574	-0.017037	0.0322903	0.0327371	0.0779291	0.181775	0.331247	0.475912	0.534111	0.415237	0.233435	-0.0328257	-0.214521	-0.308599	-0.368591	-0.345946	-0.33852	-0.332056	-0.341018	-0.348738	-0.317253	-0.154968	0.0141267	0.128506	0.144862	-0.0285176	-0.36082	-0.648134	-0.711095	-0.5077	-0.221943	-0.013598	0.069873	0.089028	0.1022	0.0955229	0.0147792	-0.193855
-0.465033	-0.323156	-0.224461	-0.179151	-0.16435	-0.119088	0.036043	0.197683	0.307021	0.322655	0.156919	-0.160734	-0.435382	-0.495568	-0.301139	-0.0279799	0.171181	0.250972	0.269283	0.281874	0.275491	0.198307	-0.00112994	-0.223326	-0.367306	-0.359309	-0.256269	-0.151738	-0.0913688	-0.0422961	0.0130985	0.0390442	0.0524507	0.053446	0.038103	0.0327634	0.0945602	0.217814	0.373869	0.518195	0.664484	0.784189	0.921605	1.04865	1.16396	1.18042	1.11761	0.933861	0.763336	0.668585
0.0309607	0.121055	0.217719	0.265713	0.220606	0.0538139	-0.145508	-0.274665	-0.267492	-0.175059	-0.0812897	-0.0271351	0.0168856	0.0665776	0.0898522	0.101879	0.102771	0.0890079	0.084218	0.139653	0.250218	0.390208	0.519676	0.650905	0.758287	0.881556	0.995523	1.09896	1.11373	1.05739	0.892551	0.73958	0.654584	0.627913	0.686441	0.767263	0.842905	0.871119	0.805416	0.666427	0.451671	0.229285	0.00424668	-0.218213	-0.355128	-0.394294	-0.330195	-0.231779	-0.120309	-0.064013
-0.212997	-0.0278883	0.155885	0.329663	0.476255	0.619108	0.735358	0.868807	0.992185	1.10417	1.12015	1.05916	0.88071	0.715106	0.62309	0.594217	0.657579	0.745075	0.826964	0.857508	0.786379	0.635912	0.40342	0.162669	-0.0809538	-0.321785	-0.470007	-0.512407	-0.443015	-0.336472	-0.215795	-0.154851	-0.158494	-0.159513	-0.166801	-0.142626	-0.109714	-0.107516	-0.121338	-0.139956	-0.149552	-0.0920277	0.0252021	0.16363	0.301166	0.383925	0.41755	0.415101	0.360809	0.269948
1.38159	1.17556	0.951423	0.749152	0.606658	0.524534	0.4969	0.543025	0.661912	0.806145	0.925019	0.985642	0.98451	0.923406	0.828396	0.762926	0.752641	0.742441	0.703809	0.669968	0.637518	0.618611	0.655049	0.736476	0.831393	0.930565	0.975894	0.98349	0.903038	0.807784	0.750051	0.69359	0.618608	0.502526	0.399155	0.335217	0.337304	0.415215	0.537634	0.567361	0.508346	0.346228	0.193099	0.0487445	-0.0633478	-0.0839468	-0.0270442	0.0294227	0.0993339	0.149892
0.184177	0.154414	0.0817558	-0.0508629	-0.172145	-0.245234	-0.242735	-0.149508	-0.00302113	0.0325497	-0.0380665	-0.232057	-0.415292	-0.588026	-0.722155	-0.746804	-0.678715	-0.611146	-0.527491	-0.466993	-0.505273	-0.633913	-0.841579	-1.02614	-1.10371	-1.07517	-0.959476	-0.843708	-0.765971	-0.712017	-0.689744	-0.650663	-0.554673	-0.412831	-0.273204	-0.159254	-0.136692	-0.225712	-0.382621	-0.513063	-0.531784	-0.48383	-0.4194	-0.415027	-0.483481	-0.56197	-0.677819	-0.764577	-0.815971	-0.829093
-1.0108	-0.844555	-0.749176	-0.653747	-0.595622	-0.635714	-0.772474	-0.993249	-1.18945	-1.27192	-1.24159	-1.11859	-0.995511	-0.912867	-0.855508	-0.831829	-0.790281	-0.688232	-0.537437	-0.388997	-0.267854	-0.243868	-0.338507	-0.50532	-0.643996	-0.663898	-0.612918	-0.544421	-0.539772	-0.612547	-0.69599	-0.819151	-0.911385	-0.966023	-0.979974	-0.903588	-0.778076	-0.655537	-0.523161	-0.442261	-0.460515	-0.514951	-0.575334	-0.577061	-0.481675	-0.413361	-0.425666	-0.513835	-0.644569	-0.733339
-0.0833713	-0.1037	-0.114137	-0.205347	-0.238356	-0.152194	0.0288505	0.209778	0.314949	0.365563	0.332508	0.244977	0.1884	0.183876	0.217262	0.285411	0.309609	0.224377	0.0805188	-0.0912986	-0.193837	-0.174127	-0.0773111	-0.00753245	0.00508614	-0.0718983	-0.194694	-0.188617	-0.0594222	0.177687	0.488666	0.733458	0.776259	0.622702	0.343491	0.0576791	-0.108303	-0.0410067	0.189505	0.369656	0.37585	0.177595	-0.195512	-0.578422	-0.860555	-0.94115	-0.897702	-0.823568	-0.795112	-0.751457
0.279343	0.360714	0.40474	0.413282	0.414012	0.358832	0.275516	0.221664	0.217358	0.249136	0.314003	0.337035	0.255909	0.118979	-0.0445637	-0.142164	-0.123403	-0.0312498	0.0351682	0.047179	-0.0260977	-0.142979	-0.137195	-0.0142225	0.211467	0.507469	0.740471	0.781211	0.63505	0.369286	0.097239	-0.0607492	0.00330612	0.222716	0.394191	0.400086	0.21138	-0.143758	-0.508227	-0.776772	-0.853485	-0.812129	-0.741566	-0.71448	-0.672928	-0.652262	-0.613322	-0.572238	-0.50386	-0.461059
0.757027	0.659953	0.606444	0.573539	0.498396	0.342666	0.118572	-0.0850924	-0.172705	-0.115349	0.0583721	0.29932	0.520434	0.694794	0.83002	0.910674	0.858868	0.698118	0.519402	0.387285	0.378045	0.440836	0.524894	0.535889	0.525795	0.516783	0.508206	0.505164	0.545263	0.607066	0.64697	0.648256	0.645861	0.628332	0.559655	0.509624	0.458264	0.49312	0.588806	0.778113	0.97062	1.04733	0.918843	0.660242	0.383045	0.240195	0.258044	0.410642	0.588828	0.714059
-0.50051	-0.37531	-0.194044	0.0441183	0.312065	0.550613	0.739681	0.886315	0.973772	0.917596	0.743286	0.549494	0.406232	0.396214	0.464301	0.555449	0.567373	0.556427	0.546655	0.537354	0.534055	0.577537	0.644553	0.687823	0.689218	0.68662	0.667613	0.593143	0.538892	0.483199	0.520995	0.624753	0.830029	1.03878	1.12196	0.982631	0.702215	0.401635	0.246734	0.26609	0.43156	0.624777	0.760572	0.775072	0.669209	0.483969	0.24992	0.0553189	-0.0880995	-0.221185
0.615558	0.699735	0.791902	0.89192	0.997683	1.07271	1.01493	0.835644	0.636323	0.488973	0.478668	0.548698	0.642448	0.654711	0.643453	0.633402	0.623836	0.620443	0.665166	0.734094	0.778599	0.780033	0.777362	0.757812	0.681217	0.625418	0.568135	0.607011	0.713729	0.924863	1.13957	1.22512	1.08182	0.793401	0.484245	0.324924	0.344831	0.515024	0.713753	0.853423	0.868338	0.759454	0.568928	0.3282	0.128046	-0.0194648	-0.156348	-0.306294	-0.450644	-0.546602
-0.840232	-0.981372	-1.10997	-1.18585	-1.17128	-1.06472	-0.806083	-0.544872	-0.27298	-0.0625787	0.135345	0.267541	0.30409	0.260168	0.192847	0.113324	0.013314	-0.0934136	-0.209366	-0.308875	-0.336441	-0.293773	-0.190077	-0.0560227	0.103761	0.277497	0.346585	0.313891	0.230418	0.0236292	-0.11005	-0.14993	-0.136824	-0.148978	-0.161465	-0.164113	-0.213543	-0.286625	-0.365938	-0.457046	-0.598557	-0.779848	-0.983829	-1.12571	-1.19769	-1.18446	-1.09028	-0.998068	-0.957581	-0.979175
-1.31057	-1.07088	-0.751964	-0.492033	-0.230008	-0.0279585	0.165836	0.295275	0.331061	0.288056	0.222139	0.144275	0.0463511	-0.0581503	-0.171684	-0.269117	-0.296108	-0.25433	-0.152798	-0.0215393	0.134912	0.305023	0.37267	0.340658	0.258926	0.0564511	-0.0744395	-0.113488	-0.100655	-0.112555	-0.124782	-0.127375	-0.175774	-0.247331	-0.32499	-0.414197	-0.552757	-0.730266	-0.929992	-1.06891	-1.13939	-1.12644	-1.03422	-0.943934	-0.904291	-0.925435	-1.04522	-1.21101	-1.3143	-1.32979
-0.190191	-0.252692	-0.314274	-0.31183	-0.2599	-0.1582	-0.0301945	0.122379	0.288274	0.354244	0.323026	0.24332	0.0458629	-0.0817836	-0.119864	-0.107349	-0.118955	-0.130879	-0.133407	-0.180606	-0.25039	-0.326124	-0.413121	-0.548246	-0.721356	-0.916131	-1.05161	-1.12034	-1.10771	-1.01777	-0.929728	-0.891067	-0.911687	-1.02851	-1.19018	-1.29091	-1.30602	-1.22116	-1.00502	-0.77776	-0.626348	-0.584705	-0.700536	-0.927714	-1.18042	-1.28475	-1.26122	-1.10673	-0.860593	-0.633852
0.745244	0.603259	0.40619	0.211053	0.0775147	0.00159432	-0.00866882	-0.0202466	-0.0370106	-0.0301199	-0.0136402	-0.0365286	-0.156879	-0.301804	-0.413789	-0.435608	-0.347156	-0.239729	-0.132868	-0.112749	-0.156956	-0.266434	-0.371237	-0.490535	-0.542971	-0.543116	-0.499972	-0.398173	-0.264872	-0.0989718	0.0504154	0.0474356	-0.136907	-0.448833	-0.715121	-0.803219	-0.709872	-0.543062	-0.403701	-0.319936	-0.292081	-0.252512	-0.210801	-0.217945	-0.284066	-0.344731	-0.338902	-0.264701	-0.164513	-0.0388561
0.0231834	0.00368209	0.062653	0.186529	0.323323	0.307696	0.102526	-0.244642	-0.541016	-0.639067	-0.535174	-0.349517	-0.19441	-0.101181	-0.0701792	-0.0261396	0.0202838	0.0123329	-0.0612586	-0.128778	-0.12229	-0.0397065	0.0718011	0.211655	0.277682	0.368503	0.531481	0.756369	0.951778	1.09019	1.10183	1.01683	0.874283	0.635117	0.443446	0.300585	0.202978	0.0888616	-0.0197379	-0.139437	-0.153931	-0.0970695	-0.0232678	0.0271045	-0.0382647	-0.176792	-0.303714	-0.337724	-0.188077	0.103856
0.998509	0.850062	0.668455	0.493769	0.278757	0.0959509	-0.0376251	-0.121305	-0.136702	-0.0959014	-0.078553	-0.0617431	0.00594043	0.188355	0.375542	0.517666	0.561439	0.558987	0.539298	0.46415	0.343997	0.177558	0.000431662	-0.143212	-0.209451	-0.273281	-0.340011	-0.388353	-0.38041	-0.272938	-0.140016	0.00057872	0.0981972	0.134428	0.101335	0.0538324	0.0130178	0.0208053	0.13542	0.361336	0.663562	0.851924	0.897485	0.823711	0.636085	0.53293	0.481501	0.445001	0.373377	0.226093
0.16654	-0.0063512	-0.126056	-0.206103	-0.220587	-0.183113	-0.165331	-0.1481	-0.078722	0.10826	0.300133	0.445815	0.490683	0.48817	0.467988	0.390958	0.267798	0.0971915	-0.0843686	-0.231609	-0.299505	-0.364934	-0.433335	-0.482886	-0.474744	-0.364582	-0.228332	-0.0842179	0.0158443	0.0529825	0.0190603	-0.0296311	-0.0714674	-0.0634849	0.0539994	0.28557	0.595363	0.78844	0.835142	0.759521	0.567198	0.46146	0.408744	0.37133	0.297913	0.146942	-0.0838891	-0.280279	-0.4313	-0.501228
-0.284193	-0.242251	-0.191239	-0.177133	-0.167577	-0.102319	0.0860742	0.279395	0.426177	0.471384	0.468852	0.448518	0.370907	0.246817	0.0749225	-0.108008	-0.25636	-0.324769	-0.390691	-0.459608	-0.509534	-0.50133	-0.390337	-0.253058	-0.107856	-0.00703865	0.0303798	-0.00379842	-0.0528573	-0.0950094	-0.0869667	0.0314044	0.264723	0.576854	0.771389	0.818443	0.742251	0.548477	0.44194	0.388827	0.35113	0.277159	0.125049	-0.107525	-0.305397	-0.457558	-0.528014	-0.485604	-0.301685	-0.018749
-0.0864134	-0.21709	-0.347509	-0.43104	-0.437732	-0.335827	-0.198678	-0.0536138	0.0471082	0.0844912	0.0503454	0.00133294	-0.0407792	-0.0327441	0.0855149	0.318613	0.630448	0.824798	0.871808	0.795688	0.602097	0.495662	0.442599	0.404938	0.331037	0.179071	-0.0532828	-0.250968	-0.402985	-0.473374	-0.431004	-0.247259	0.035409	0.356427	0.592249	0.686366	0.646841	0.556364	0.49605	0.436787	0.39617	0.395026	0.444689	0.503847	0.578035	0.677203	0.855096	1.02052	1.11648	1.04977
0.0702125	0.256688	0.452219	0.592681	0.637384	0.579887	0.494141	0.43698	0.380816	0.342322	0.341238	0.388304	0.44437	0.514679	0.608663	0.777255	0.93403	1.02498	0.961754	0.726546	0.378781	0.0161069	-0.243916	-0.37905	-0.361708	-0.274396	-0.204611	-0.212715	-0.20831	-0.180775	-0.0374837	0.292418	0.701971	1.10623	1.40843	1.55679	1.49995	1.32833	1.12528	1.02437	0.912432	0.695626	0.344836	-0.00691731	-0.287527	-0.383703	-0.341647	-0.240955	-0.145931	-0.135824
-0.229283	-0.397529	-0.474399	-0.446553	-0.306467	-0.0495795	0.239361	0.50562	0.661268	0.717787	0.683981	0.536704	0.408969	0.344997	0.401867	0.560945	0.81475	1.03699	1.13451	1.07158	0.945317	0.802588	0.672973	0.577706	0.447845	0.291189	0.12123	0.00334404	-0.0230647	0.00950052	0.0918557	0.238674	0.352468	0.456397	0.516982	0.546128	0.575016	0.59937	0.600157	0.597911	0.600641	0.534657	0.398577	0.281236	0.189466	0.151355	0.13334	0.0843595	0.032671	0.00543798
1.17021	1.14984	1.0116	0.783023	0.452331	0.123964	-0.16908	-0.422555	-0.614486	-0.768403	-0.878583	-0.926545	-0.913628	-0.879068	-0.826994	-0.782136	-0.776427	-0.767737	-0.814662	-0.858135	-0.8343	-0.708519	-0.510947	-0.32389	-0.200319	-0.198377	-0.320778	-0.446107	-0.498754	-0.43958	-0.282929	-0.159681	-0.115231	-0.171198	-0.215879	-0.169347	-0.0940613	-0.0269442	-0.0293767	-0.103465	-0.123508	-0.0731523	0.0669934	0.271653	0.447076	0.540574	0.531104	0.532264	0.563567	0.609184
-0.580551	-0.714977	-0.834828	-0.931261	-0.972186	-0.958183	-0.922347	-0.868349	-0.821834	-0.815914	-0.806903	-0.855562	-0.90064	-0.875925	-0.745498	-0.540627	-0.346661	-0.218525	-0.216511	-0.343434	-0.473393	-0.527984	-0.466624	-0.304186	-0.176385	-0.130293	-0.188328	-0.23466	-0.186408	-0.108342	-0.0387452	-0.0412676	-0.118092	-0.138876	-0.0866603	0.0586625	0.270883	0.452786	0.549737	0.539918	0.54112	0.57358	0.620882	0.617688	0.484511	0.237951	-0.0771977	-0.320244	-0.406992	-0.354046
-0.00445905	0.207187	0.439368	0.677498	0.864419	0.96155	0.951656	0.952868	0.985573	1.03323	1.03001	0.895831	0.647411	0.329883	0.085002	-0.002401	0.0509447	0.176857	0.265528	0.259374	0.164529	0.0132416	-0.211578	-0.408288	-0.469965	-0.383378	-0.166814	0.0572665	0.240547	0.313899	0.317132	0.340965	0.520917	0.732874	0.870603	0.7805	0.472877	0.0950509	-0.206655	-0.268933	-0.10657	0.15273	0.385923	0.546904	0.646725	0.677983	0.615575	0.467859	0.291508	0.13527
-0.0702544	0.0988872	0.221288	0.254841	0.244246	0.268374	0.452338	0.66902	0.80982	0.717708	0.403227	0.0169778	-0.291454	-0.35512	-0.189137	0.0759429	0.314334	0.478904	0.580951	0.612906	0.549106	0.398097	0.217814	0.058093	-0.0500382	-0.143364	-0.226756	-0.280811	-0.227475	-0.081561	0.0840317	0.198546	0.252203	0.240711	0.225819	0.260381	0.387548	0.606187	0.873852	1.0779	1.14357	1.05604	0.880594	0.64223	0.434992	0.308752	0.249596	0.230829	0.198698	0.127028
0.114757	0.0995077	0.164744	0.38205	0.612021	0.759397	0.667736	0.354793	-0.0295676	-0.336491	-0.399846	-0.234675	0.0291091	0.266334	0.4301	0.531647	0.563446	0.499958	0.349688	0.170287	0.0113466	-0.0962559	-0.189125	-0.27211	-0.3259	-0.272825	-0.127625	0.0371584	0.151113	0.204507	0.193072	0.178253	0.212646	0.339191	0.556761	0.823117	1.02616	1.09152	1.00442	0.829826	0.592627	0.386402	0.26078	0.201913	0.183238	0.151264	0.0799442	-0.024428	-0.121727	-0.151374
-0.415162	-0.51206	-0.560815	-0.499853	-0.358987	-0.200606	-0.0922318	-0.0414523	-0.0523277	-0.066421	-0.0337122	0.0866355	0.293551	0.546863	0.739965	0.802121	0.719284	0.553243	0.327661	0.131535	0.0120643	-0.0439196	-0.0616799	-0.0920877	-0.159915	-0.259176	-0.35171	-0.379905	-0.335356	-0.314719	-0.322039	-0.322885	-0.279638	-0.152846	0.029175	0.187837	0.287726	0.344305	0.339749	0.235991	0.0206498	-0.218426	-0.43742	-0.584273	-0.682723	-0.770816	-0.874357	-0.958586	-0.964429	-0.845659
0.0655035	-0.0602259	-0.17079	-0.22625	-0.200732	-0.066277	0.13835	0.316716	0.42901	0.492616	0.487494	0.37085	0.128766	-0.140001	-0.386192	-0.551282	-0.661959	-0.760992	-0.877391	-0.97208	-0.978649	-0.845129	-0.586497	-0.28485	0.0198858	0.229432	0.333083	0.318819	0.275613	0.25545	0.256632	0.309927	0.347788	0.277758	0.138367	-0.0417119	-0.131636	-0.0926076	-0.000912657	0.0891928	0.135201	0.128585	0.110379	0.0904413	0.138971	0.315859	0.476436	0.554227	0.529948	0.389309
0.649582	0.567599	0.447358	0.361246	0.330092	0.33025	0.392922	0.437444	0.355093	0.191177	-0.020587	-0.126334	-0.0804377	0.0273908	0.13335	0.187453	0.179673	0.158264	0.134818	0.191886	0.399897	0.588728	0.680207	0.651656	0.486271	0.108618	-0.285845	-0.537624	-0.56529	-0.298242	0.167038	0.558415	0.757334	0.763894	0.691257	0.557885	0.392672	0.217855	0.0518804	-0.120774	-0.236443	-0.343526	-0.529245	-0.717936	-0.8377	-0.753818	-0.506257	-0.198657	0.0657796	0.145113
-0.274921	-0.168665	-0.0744373	0.0537279	0.157075	0.247108	0.310806	0.321197	0.320526	0.298341	0.221799	0.0913176	-0.066177	-0.143342	-0.136137	-0.0186361	0.146615	0.272739	0.355783	0.326099	0.194611	0.0434192	-0.0168369	0.0288572	0.179614	0.322174	0.428026	0.471854	0.446506	0.357668	0.196132	0.0477946	-0.0260399	-0.0642261	-0.0713301	-0.0918284	-0.0636376	0.00711619	0.185033	0.353276	0.515579	0.61074	0.658128	0.587019	0.384602	0.087617	-0.286761	-0.601851	-0.794219	-0.785743
0.252376	0.275229	0.299322	0.298092	0.230286	0.104076	-0.0581787	-0.137676	-0.130253	-0.00920103	0.161044	0.29098	0.376533	0.345953	0.210491	0.0547297	-0.0073475	0.0397276	0.195041	0.341909	0.45096	0.496112	0.469998	0.378476	0.212057	0.0592373	-0.0168286	-0.0561689	-0.0634876	-0.0846054	-0.0555626	0.0173295	0.200624	0.37395	0.541159	0.639196	0.688016	0.614758	0.406224	0.100263	-0.285429	-0.610042	-0.808223	-0.799492	-0.594866	-0.305425	-0.0183701	0.203744	0.323383	0.377919
0.278855	0.00739982	-0.199298	-0.289862	-0.201721	0.00509121	0.220242	0.435143	0.62118	0.757657	0.812909	0.807319	0.751765	0.666048	0.589143	0.459503	0.33561	0.179159	0.0373706	-0.0217758	-0.037113	-0.045775	-0.0898096	-0.184358	-0.310659	-0.485896	-0.576462	-0.495312	-0.300324	-0.0876253	0.0461518	0.0348447	-0.00994591	0.00512365	0.159316	0.342796	0.453416	0.431147	0.346334	0.192084	0.0822476	-0.0563352	-0.131068	-0.177381	-0.200684	-0.20011	-0.206323	-0.164748	-0.114878	0.00166548
0.353588	0.0861411	-0.0753471	-0.104996	0.0327339	0.200833	0.308303	0.286668	0.20427	0.0544113	-0.0522976	-0.186935	-0.25954	-0.304534	-0.327174	-0.326616	-0.332652	-0.292261	-0.24381	-0.130585	0.027133	0.178772	0.293059	0.339782	0.338749	0.297705	0.22593	0.162268	0.131288	0.0420126	-0.0596505	-0.135419	-0.160037	-0.113297	0.0267815	0.222002	0.339842	0.34869	0.241179	0.107257	-0.0248449	-0.118945	-0.187445	-0.239149	-0.268198	-0.296472	-0.372367	-0.511236	-0.658942	-0.840932
0.212666	0.269826	0.248428	0.149458	0.0269036	-0.134799	-0.338561	-0.458758	-0.559149	-0.544001	-0.441396	-0.311324	-0.177552	-0.0958578	-0.0679055	-0.0797729	-0.102867	-0.125674	-0.129491	-0.0724201	0.104923	0.374921	0.687583	0.896839	0.949088	0.848037	0.63922	0.430615	0.362506	0.360001	0.34915	0.270405	0.196227	0.168451	0.180564	0.239605	0.186487	0.05945	0.00313043	0.0760509	0.283786	0.523233	0.678941	0.703328	0.531278	0.265402	0.0704285	-0.0114692	0.0987798	0.343871
-0.0383922	-0.0549916	0.0103294	0.182234	0.430169	0.722352	0.918394	0.967345	0.872674	0.677043	0.48161	0.417801	0.415454	0.405289	0.331515	0.262021	0.235999	0.247347	0.30266	0.252896	0.13388	0.0811171	0.149433	0.344051	0.568379	0.714256	0.737103	0.575916	0.326829	0.144166	0.0674393	0.170727	0.400342	0.664209	0.877282	0.96359	0.920952	0.78116	0.712413	0.754677	0.867584	0.97858	1.03651	1.0771	1.10597	1.0494	0.915576	0.829375	0.812048	0.868758
1.2523	1.08554	0.877098	0.641164	0.439703	0.374172	0.371809	0.361574	0.287301	0.217335	0.191136	0.202562	0.25825	0.208148	0.0883252	0.0352039	0.103983	0.299922	0.525772	0.672638	0.695639	0.533359	0.282582	0.0986803	0.0214333	0.125422	0.356594	0.622251	0.83677	0.923664	0.880736	0.739996	0.670782	0.713333	0.827006	0.938754	0.997082	1.03794	1.06701	1.01005	0.875323	0.788538	0.771093	0.828188	0.85719	0.840664	0.798095	0.667556	0.484649	0.254576
-0.0106109	-0.143771	-0.245881	-0.323849	-0.33628	-0.265002	-0.169712	-0.0799133	-0.0576269	-0.098187	-0.138759	-0.17136	-0.147526	-0.0885013	-0.0324506	0.0240665	0.0702771	0.0757231	0.0685943	0.000741398	-0.110592	-0.191975	-0.212414	-0.174618	-0.14075	-0.130789	-0.129311	-0.104215	-0.0274051	0.0738486	0.215756	0.401281	0.586906	0.785502	0.949686	1.0562	1.0593	0.946945	0.715736	0.495486	0.294385	0.136038	0.0474388	-0.0212965	-0.0595577	-0.0907881	-0.0847462	-0.0883951	-0.0705151	-0.0452987
0.629875	0.823732	1.00646	1.22558	1.41649	1.54694	1.551	1.40402	1.10156	0.813432	0.550356	0.34321	0.227306	0.137388	0.0873356	0.0464807	0.0543846	0.0496111	0.0730013	0.105989	0.173938	0.315672	0.371424	0.367797	0.215725	0.00543532	-0.20694	-0.254068	-0.115242	0.179004	0.531646	0.822827	0.954982	0.994017	0.937287	0.822846	0.668648	0.484731	0.324389	0.172742	0.037271	-0.0598409	-0.120122	-0.203544	-0.326696	-0.455651	-0.570767	-0.59038	-0.506214	-0.349512
-0.131408	-0.044618	0.0410041	0.125605	0.175422	0.236409	0.29923	0.383194	0.480445	0.605361	0.71618	0.721636	0.664269	0.611497	0.545714	0.533053	0.550531	0.560679	0.578856	0.657662	0.818551	1.0091	1.21218	1.27869	1.26501	1.1013	0.835467	0.545119	0.221148	-0.0561771	-0.157337	-0.0376302	0.242428	0.535359	0.691232	0.747721	0.769889	0.739639	0.74018	0.785163	0.802131	0.723123	0.506024	0.228184	-0.0472182	-0.217873	-0.251783	-0.200217	-0.154078	-0.0741733
0.456015	0.487835	0.524292	0.540757	0.557621	0.641018	0.806445	1.00237	1.21117	1.27956	1.2655	1.09717	0.823839	0.525302	0.192194	-0.0929525	-0.196965	-0.0738825	0.214074	0.515266	0.675535	0.733618	0.75641	0.725308	0.725864	0.772116	0.789562	0.708326	0.485105	0.199429	-0.0837409	-0.259208	-0.294075	-0.241055	-0.193614	-0.111456	-0.0755852	-0.0308552	0.00183983	-0.00763065	-0.0645006	-0.112989	-0.156812	-0.0787372	0.0562628	0.265294	0.527224	0.807019	1.03787	1.24412
-0.0972951	-0.236499	-0.355154	-0.356613	-0.199075	0.0936565	0.381824	0.535163	0.590733	0.61254	0.582783	0.583315	0.627567	0.644258	0.566536	0.352967	0.0796446	-0.19128	-0.359159	-0.392518	-0.341791	-0.296402	-0.217796	-0.183477	-0.140681	-0.1094	-0.118461	-0.172871	-0.219263	-0.261191	-0.186492	-0.0573302	0.142662	0.393264	0.660961	0.88183	1.07916	1.13212	0.988849	0.703497	0.384879	0.143733	0.0701903	0.102702	0.121609	0.0787505	0.0128461	-0.0134849	0.0202791	0.101875
-0.604706	-0.495909	-0.411802	-0.368839	-0.302088	-0.277483	-0.238781	-0.210491	-0.218686	-0.267892	-0.309846	-0.347764	-0.28021	-0.163402	0.0174598	0.244092	0.486182	0.685925	0.864382	0.912278	0.782708	0.52465	0.236508	0.0184287	-0.0480795	-0.0186778	-0.00157901	-0.0403382	-0.0999386	-0.123751	-0.0932166	-0.0194259	0.0642934	0.124367	0.158363	0.117137	0.0932374	0.0361705	0.0108402	-0.0156804	-0.0606717	-0.105386	-0.207979	-0.326295	-0.441957	-0.532195	-0.618078	-0.762917	-0.946531	-1.13615
0.271016	0.0965707	-0.0802777	-0.254541	-0.376408	-0.40409	-0.293916	-0.0653941	0.161066	0.33784	0.405398	0.406316	0.418206	0.473447	0.581632	0.64923	0.674692	0.703383	0.771903	0.899535	0.997741	0.990619	0.853914	0.619182	0.395228	0.23509	0.1732	0.208538	0.338111	0.498792	0.682795	0.818578	0.895362	0.907507	0.891212	0.809311	0.757166	0.768468	0.865941	0.984893	1.0369	1.01793	0.890794	0.73287	0.586492	0.46702	0.379276	0.266398	0.150848	0.0641825
0.0114515	0.161634	0.278277	0.39663	0.480311	0.531271	0.540201	0.491808	0.361055	0.207229	0.112912	0.0961833	0.108265	0.140204	0.150401	0.125802	-0.000431441	-0.219036	-0.443179	-0.624801	-0.660561	-0.517854	-0.249765	0.132669	0.643374	1.17682	1.6831	2.04632	2.22024	2.16191	1.90848	1.64339	1.44109	1.35896	1.2977	1.15076	0.980245	0.797728	0.65935	0.530793	0.311406	0.050371	-0.0986959	-0.0264676	0.235147	0.493728	0.651632	0.722464	0.719411	0.741647
-0.355052	-0.294422	-0.242832	-0.265226	-0.382083	-0.521879	-0.641883	-0.656871	-0.553509	-0.394069	-0.227247	-0.15378	-0.148114	-0.224964	-0.361083	-0.56042	-0.692668	-0.709825	-0.563714	-0.320641	-0.0533179	0.168578	0.228144	0.124656	-0.105821	-0.288512	-0.396378	-0.370215	-0.322543	-0.28771	-0.333381	-0.44537	-0.576773	-0.67452	-0.658852	-0.533577	-0.317096	-0.051082	0.161379	0.243019	0.154839	-0.0415058	-0.265888	-0.458518	-0.603286	-0.685261	-0.789888	-0.944555	-1.14262	-1.38962
0.271589	0.304238	0.327424	0.329704	0.335168	0.239817	0.0261209	-0.264262	-0.509412	-0.636175	-0.619612	-0.510027	-0.35196	-0.152767	0.0924598	0.354896	0.569126	0.675931	0.659541	0.516358	0.43244	0.320853	0.145631	-0.0923359	-0.319953	-0.45074	-0.449778	-0.329686	-0.143216	0.0121628	0.0953344	0.15933	0.174673	0.180285	0.2329	0.293037	0.334213	0.391972	0.470908	0.522939	0.428208	0.232367	-0.0258628	-0.253277	-0.475466	-0.638221	-0.710281	-0.73988	-0.771418	-0.753365
-0.0342729	0.0682203	0.073289	-0.0147718	-0.173934	-0.313813	-0.367573	-0.369539	-0.341844	-0.323241	-0.360981	-0.461356	-0.579342	-0.753033	-0.889827	-0.935547	-0.880886	-0.742559	-0.560516	-0.372519	-0.271582	-0.243754	-0.335306	-0.44013	-0.581831	-0.759999	-0.885589	-0.934354	-0.845343	-0.666338	-0.54415	-0.460858	-0.386025	-0.385397	-0.451186	-0.542711	-0.663181	-0.787745	-0.870795	-0.875683	-0.785209	-0.658503	-0.522012	-0.323145	-0.0291173	0.258428	0.365978	0.141319	-0.357876	-0.960744
1.00394	1.16651	1.21797	1.17303	1.05153	0.936076	0.892243	0.93185	1.09515	1.33922	1.50023	1.52558	1.45791	1.34649	1.22916	1.10599	0.948357	0.749329	0.547004	0.43802	0.452106	0.578727	0.754299	0.868387	0.925258	0.952936	0.899424	0.768459	0.614704	0.475927	0.449751	0.549433	0.696549	0.778491	0.771898	0.656531	0.523445	0.388788	0.267183	0.173771	0.124658	0.142372	0.270116	0.438734	0.620757	0.772755	0.849017	0.872573	0.844755	0.761082
0.532309	0.510151	0.513415	0.460619	0.346827	0.21369	0.0898117	0.0664457	0.155426	0.286748	0.359894	0.354009	0.251027	0.132228	0.0120271	-0.0965235	-0.179907	-0.223748	-0.207936	-0.0939049	0.0566109	0.219093	0.354774	0.422849	0.443876	0.419045	0.344354	0.289744	0.249371	0.205058	0.192241	0.239578	0.359915	0.525407	0.68942	0.868404	1.00327	1.08442	1.09845	1.06423	0.922771	0.735643	0.534721	0.309855	0.104415	-0.0618995	-0.181709	-0.272719	-0.32149	-0.32706
-0.710444	-0.612447	-0.490782	-0.306454	-0.117304	0.0755785	0.228867	0.305777	0.329533	0.301478	0.217094	0.155398	0.109786	0.0597222	0.0452412	0.0987216	0.234675	0.421643	0.606941	0.809152	0.961524	1.0532	1.06906	1.0304	0.870575	0.659162	0.432167	0.178119	-0.0539816	-0.24188	-0.377237	-0.480058	-0.535158	-0.541451	-0.507575	-0.379297	-0.156537	0.0876754	0.246947	0.281242	0.258125	0.257665	0.352181	0.478976	0.572521	0.60572	0.594824	0.581443	0.544839	0.485925
0.61643	0.521393	0.453049	0.346116	0.238114	0.143349	0.089496	0.149074	0.340116	0.63765	0.942148	1.16266	1.25349	1.20115	1.08925	1.01072	1.05655	1.19426	1.36249	1.49496	1.57922	1.67725	1.76193	1.83745	1.80822	1.63453	1.33179	1.04156	0.85411	0.820941	0.896478	0.99199	1.06811	1.07101	1.03833	0.968847	0.859663	0.739379	0.627934	0.5851	0.546141	0.445286	0.291381	0.159216	0.11238	0.145825	0.187133	0.241894	0.301651	0.338281
0.51141	0.583886	0.632762	0.662194	0.647274	0.611965	0.551968	0.457693	0.353834	0.257607	0.220622	0.186983	0.0998999	-0.0329885	-0.147107	-0.187547	-0.158669	-0.123002	-0.0757185	-0.0241209	0.0075073	-0.00135017	-0.0635915	-0.13987	-0.209563	-0.239009	-0.238294	-0.208301	-0.157048	-0.0689691	0.027085	0.0871705	0.119237	0.116803	0.0262265	-0.0646917	-0.189156	-0.295744	-0.373613	-0.395344	-0.424319	-0.396581	-0.410226	-0.400536	-0.311051	-0.199449	-0.0950391	-0.0714501	-0.14374	-0.284394
-0.681357	-0.650063	-0.505655	-0.241867	0.111398	0.417573	0.659466	0.866855	1.02563	1.14166	1.24305	1.26692	1.19543	1.05446	0.933049	0.886364	0.949758	1.06338	1.20976	1.31009	1.31597	1.22304	1.0741	0.869043	0.714118	0.622208	0.618555	0.678105	0.762304	0.778795	0.715533	0.619434	0.546183	0.510922	0.473078	0.447703	0.465851	0.50855	0.549077	0.521791	0.474175	0.413683	0.4142	0.42636	0.46968	0.448215	0.350605	0.230826	0.0697089	-0.0880726
-0.384015	-0.37325	-0.358821	-0.345487	-0.326493	-0.226509	-0.0951924	0.0334995	0.137082	0.184971	0.156062	0.0928468	0.0726179	0.0962038	0.122528	0.179994	0.256622	0.354183	0.428116	0.481069	0.512708	0.512811	0.525167	0.533457	0.569614	0.602231	0.633651	0.642785	0.678677	0.72976	0.784956	0.853913	0.960299	1.07778	1.17163	1.17247	1.08706	0.979158	0.847153	0.742724	0.707392	0.764251	0.862421	0.926689	0.869822	0.738409	0.558654	0.402564	0.345568	0.35287
0.26036	0.189666	0.113274	-0.0538682	-0.318888	-0.63764	-0.895865	-1.07584	-1.16543	-1.14078	-0.972389	-0.76655	-0.509452	-0.273326	-0.144394	-0.0626687	0.0405585	0.167	0.346801	0.490201	0.585464	0.604245	0.558175	0.480153	0.409346	0.296633	0.122608	0.0438692	0.0231924	0.167737	0.452218	0.742824	0.961463	1.12145	1.30447	1.47501	1.64089	1.68874	1.64345	1.42866	1.10696	0.726386	0.329357	0.00484847	-0.278321	-0.356098	-0.261527	0.00326694	0.382446	0.742753
0.633039	0.781892	0.996941	1.20638	1.37934	1.49723	1.51183	1.41238	1.24411	1.03091	0.803824	0.637469	0.5695	0.632228	0.745526	0.861227	0.896201	0.770253	0.633166	0.557178	0.569531	0.654927	0.795602	0.975743	1.19416	1.35879	1.44621	1.43999	1.31018	1.09379	0.854977	0.699982	0.677624	0.828394	0.987619	1.10557	1.09276	0.91273	0.657458	0.42729	0.272745	0.209065	0.163957	0.116908	0.0589914	-0.0441293	-0.175137	-0.291078	-0.380746	-0.42737
0.210151	-0.024345	-0.284849	-0.547341	-0.697898	-0.790656	-0.772889	-0.763285	-0.851048	-1.01491	-1.20061	-1.32481	-1.40343	-1.386	-1.37661	-1.35307	-1.40187	-1.44687	-1.40455	-1.32718	-1.17018	-1.00489	-0.786339	-0.504624	-0.220549	-0.0133903	0.0968393	0.131512	0.0871649	0.001815	-0.116628	-0.247422	-0.413971	-0.56352	-0.710775	-0.852938	-0.997324	-1.0501	-0.986412	-0.807745	-0.57543	-0.371432	-0.245044	-0.175813	-0.12457	-0.137562	-0.249141	-0.501644	-0.759061	-0.881829
-0.177003	-0.312986	-0.410323	-0.383065	-0.247352	-0.0344565	0.122414	0.174954	0.0945112	-0.0470401	-0.153829	-0.205566	-0.235783	-0.254157	-0.259796	-0.198559	-0.115388	0.00816153	0.135256	0.185899	0.147699	0.0416823	-0.0607508	-0.0998528	-0.0580983	0.00675564	0.0568792	0.0330286	-0.0287026	-0.102731	-0.145857	-0.160924	-0.227052	-0.248099	-0.187508	0.00429228	0.251482	0.45288	0.54414	0.531892	0.436745	0.267421	0.0216526	-0.238669	-0.420469	-0.556414	-0.602777	-0.592525	-0.474615	-0.309856
-0.11073	-0.0716557	-0.0519302	-0.0264366	0.0310157	0.0371701	-0.0298829	-0.109909	-0.129132	-0.083014	0.0102188	0.111302	0.212329	0.214381	0.152433	0.0502757	-0.0490665	-0.0487782	0.00318749	0.122981	0.199036	0.157165	-0.00902125	-0.185843	-0.318559	-0.329221	-0.261897	-0.13648	0.0375941	0.274384	0.518496	0.645821	0.632606	0.533984	0.370657	0.241329	0.146791	0.125516	0.0822295	-0.0288753	-0.150388	-0.19419	-0.185386	-0.114426	0.0199031	0.146637	0.228741	0.25999	0.307263	0.336347
-0.597444	-0.425782	-0.300801	-0.267822	-0.286515	-0.329228	-0.372748	-0.429655	-0.44845	-0.451198	-0.410908	-0.291672	-0.0817034	0.166746	0.415586	0.56501	0.586196	0.53112	0.461573	0.463723	0.565209	0.716816	0.893655	1.01622	1.0667	1.00288	0.855621	0.57222	0.314244	0.148333	0.0910413	0.135894	0.152304	0.13671	0.0566245	-0.0210729	-0.0483017	0.0201898	0.171568	0.39891	0.656124	0.860011	0.971121	0.969103	0.862706	0.688628	0.489368	0.299935	0.116189	-0.0728122
0.717203	0.532684	0.369674	0.261478	0.317907	0.377844	0.39663	0.455861	0.440824	0.459365	0.499929	0.532772	0.50151	0.411308	0.317869	0.255223	0.162044	0.0860377	0.0341215	0.0557837	0.0673154	0.140345	0.197372	0.157088	0.0394439	-0.143161	-0.216845	-0.20446	-0.0748503	0.0887675	0.2549	0.359503	0.384173	0.392398	0.45665	0.52696	0.606908	0.646641	0.647534	0.60124	0.539248	0.476147	0.385226	0.228336	0.0597188	-0.067328	-0.167061	-0.246903	-0.31826	-0.407863
0.0851361	0.214298	0.296045	0.375765	0.406953	0.408153	0.370399	0.319844	0.268384	0.194236	0.0662907	-0.0712194	-0.174828	-0.256162	-0.321274	-0.379467	-0.452539	-0.496902	-0.46346	-0.392303	-0.304939	-0.303383	-0.41846	-0.623541	-0.857073	-1.00134	-1.03974	-0.943924	-0.739048	-0.542503	-0.401936	-0.306754	-0.2206	-0.101913	0.0222785	0.188451	0.313999	0.363079	0.343657	0.258262	0.133933	-0.02985	-0.233293	-0.44421	-0.554903	-0.604217	-0.573701	-0.516103	-0.452977	-0.327624
0.395112	0.302224	0.236535	0.186	0.11239	-0.0110241	-0.146013	-0.247723	-0.327565	-0.391484	-0.44861	-0.520343	-0.563892	-0.531063	-0.461211	-0.375448	-0.373921	-0.486888	-0.68821	-0.91746	-1.05908	-1.09678	-1.00272	-0.801599	-0.608657	-0.470667	-0.37723	-0.292656	-0.176145	-0.0542296	0.108896	0.232143	0.280323	0.261258	0.177427	0.055378	-0.105402	-0.305116	-0.512166	-0.62083	-0.66924	-0.639283	-0.582741	-0.520773	-0.397718	-0.261405	-0.108374	0.00133909	0.0310846	-0.0155712
-0.182502	-0.303989	-0.355702	-0.314289	-0.184417	0.00263335	0.202315	0.339077	0.437603	0.462234	0.446519	0.402861	0.360554	0.275713	0.20285	0.0995484	0.0302648	0.00741167	-0.0163539	-0.0452152	-0.112708	-0.0418453	0.15007	0.419827	0.6695	0.869138	0.965486	0.912164	0.737649	0.458697	0.207174	0.00587211	-0.133733	-0.284525	-0.462903	-0.609627	-0.627359	-0.458437	-0.221329	0.0243691	0.141321	0.166891	0.142401	0.146248	0.210251	0.339777	0.507648	0.665293	0.769717	0.795985
-0.242401	-0.177778	-0.173169	-0.2022	-0.28054	-0.201802	0.0217887	0.336068	0.626949	0.859536	0.971787	0.909663	0.706345	0.381354	0.0883178	-0.146208	-0.308855	-0.484534	-0.692354	-0.863293	-0.883953	-0.68715	-0.410908	-0.124659	0.0115953	0.0413862	0.0128535	0.0173363	0.0919026	0.242806	0.438384	0.622048	0.743707	0.77431	0.734011	0.717528	0.758406	0.789113	0.786426	0.680752	0.427161	0.0641571	-0.275837	-0.560031	-0.729313	-0.809256	-0.821168	-0.765392	-0.718137	-0.686797
-0.866554	-0.830863	-0.847425	-0.868621	-0.879739	-0.871146	-0.820017	-0.7767	-0.747972	-0.719317	-0.643417	-0.491593	-0.231769	0.0547937	0.243479	0.293985	0.168319	0.0588919	0.00150833	0.0675252	0.14495	0.244421	0.346434	0.481109	0.560631	0.543079	0.474283	0.401261	0.367258	0.381264	0.436482	0.45662	0.352707	0.0993541	-0.183162	-0.301996	-0.269651	-0.144948	-0.0478882	-0.0365129	-0.057558	-0.0965793	-0.107861	-0.106962	-0.0967805	-0.111286	-0.10014	-0.0771116	-0.0611783	-0.0169897
0.66181	0.547015	0.380687	0.244521	0.171691	0.143377	0.200161	0.260122	0.283677	0.198508	0.0879605	-0.00691801	-0.0434603	-0.0377734	-0.00494388	7.99042e-05	0.0186232	0.05706	0.0642168	0.0534411	0.0384036	0.0764494	0.14821	0.278735	0.393712	0.463376	0.467275	0.464537	0.444916	0.46673	0.489728	0.454665	0.329754	0.208201	0.0914462	-0.00435521	-0.0416448	-0.0337697	0.013703	0.0601777	0.0146647	-0.121669	-0.219494	-0.264191	-0.144413	0.0532086	0.263253	0.4269	0.472125	0.427849
-0.235986	-0.191462	-0.144335	-0.101214	-0.0554014	-0.00901229	-0.00427661	0.0132032	0.0494358	0.0561821	0.0460245	0.0318493	0.0677132	0.135358	0.258398	0.366782	0.432451	0.436126	0.433545	0.41505	0.435612	0.457291	0.424239	0.306492	0.191909	0.08185	-0.00845738	-0.0436085	-0.036185	0.00856525	0.0523748	0.00947174	-0.119043	-0.211259	-0.253392	-0.140483	0.0458052	0.243804	0.398067	0.440698	0.398961	0.244866	0.0280252	-0.179179	-0.281329	-0.266161	-0.168949	-0.064713	-0.0431589	-0.170046
-0.00512596	0.0228469	0.0139812	0.0332842	0.0684285	0.0784672	0.0682397	0.0539672	0.0900774	0.158187	0.282072	0.3912	0.45732	0.461021	0.458422	0.439799	0.460503	0.482331	0.449052	0.330496	0.215126	0.104311	0.0133837	-0.0220088	-0.0145344	0.0305232	0.0746336	0.031436	-0.0979615	-0.19081	-0.233233	-0.119549	0.068019	0.267378	0.4227	0.465623	0.4236	0.268447	0.0501168	-0.15851	-0.261362	-0.24609	-0.14821	-0.0432583	-0.0215561	-0.149315	-0.388172	-0.581259	-0.678503	-0.636031
0.288542	-0.0232163	-0.22572	-0.310519	-0.287594	-0.167674	-0.040703	0.089277	0.205042	0.236409	0.195457	0.105629	-0.0779415	-0.226361	-0.353468	-0.389704	-0.369351	-0.350236	-0.350746	-0.404761	-0.424728	-0.371204	-0.248413	-0.144287	-0.0904181	-0.11109	-0.143483	-0.182779	-0.218553	-0.302812	-0.427917	-0.53193	-0.563598	-0.492509	-0.296969	-0.0492767	0.164343	0.274129	0.275656	0.169182	-0.0247169	-0.186756	-0.245534	-0.183603	-0.107607	-0.0256398	0.0519478	0.129514	0.165081	0.162599
-0.174156	-0.261786	-0.339398	-0.337964	-0.305577	-0.28162	-0.282145	-0.33772	-0.358263	-0.303194	-0.176857	-0.0697261	-0.0143015	-0.0355704	-0.0688987	-0.109329	-0.146135	-0.232827	-0.361544	-0.46856	-0.501142	-0.428001	-0.226816	0.0280276	0.247815	0.36077	0.362341	0.252793	0.0532964	-0.113421	-0.173896	-0.110177	-0.0319872	0.0523469	0.132174	0.21198	0.248573	0.24602	0.220949	0.194328	0.16984	0.112863	0.0822174	0.0504681	0.0369972	0.017835	0.0545362	0.156259	0.269726	0.353633
-0.481606	-0.496457	-0.447092	-0.339222	-0.195706	-0.075961	-0.021393	-0.0423332	-0.0751464	-0.114952	-0.151189	-0.236542	-0.363269	-0.468631	-0.50071	-0.428699	-0.230623	0.020282	0.236672	0.347882	0.349429	0.241574	0.0451602	-0.11898	-0.178521	-0.115786	-0.0388053	0.0442254	0.122819	0.201391	0.237419	0.234905	0.210222	0.184012	0.159903	0.103806	0.0736343	0.0423756	0.0291129	0.0102469	0.0463809	0.146532	0.258245	0.340855	0.288926	0.13876	-0.0807573	-0.264214	-0.359015	-0.365822
-0.278902	-0.458443	-0.652933	-0.77476	-0.814251	-0.741563	-0.580487	-0.387966	-0.201404	-0.0653755	0.0543565	0.127148	0.154401	0.0989209	-0.0542786	-0.27984	-0.451783	-0.500577	-0.443994	-0.377328	-0.388454	-0.347276	-0.254098	-0.0891292	0.05665	0.119741	0.160298	0.244094	0.392406	0.501521	0.515605	0.464792	0.409274	0.414466	0.470119	0.564264	0.620123	0.621466	0.542069	0.449166	0.323926	0.174034	0.0596915	0.000326951	-0.0659607	-0.0926786	-0.127427	-0.160613	-0.262891	-0.406036
0.452008	0.412774	0.333398	0.219476	0.122455	0.071752	0.00717536	-0.018853	-0.0527045	-0.0850342	-0.184672	-0.324123	-0.47237	-0.472649	-0.319031	-0.0703729	0.260186	0.549646	0.764876	0.843605	0.785117	0.624954	0.370045	0.0955258	-0.124716	-0.252102	-0.240725	-0.118956	-0.02033	-0.0118669	-0.0299499	-0.0252162	0.0034022	0.016035	-0.00366747	-0.0391079	-0.0347921	0.0165214	0.110759	0.175216	0.110705	-0.0167157	-0.108389	-0.122336	-0.0417961	0.0771707	0.202984	0.335441	0.462711	0.491319
0.0906562	0.217721	0.332365	0.347137	0.300434	0.296297	0.34788	0.403418	0.369183	0.267875	0.0813847	-0.135254	-0.2954	-0.290179	-0.156053	0.0597086	0.249417	0.31893	0.240688	0.0200498	-0.194993	-0.345209	-0.437535	-0.537674	-0.600089	-0.621515	-0.626575	-0.643339	-0.644675	-0.482051	-0.183599	0.294768	0.789262	1.13554	1.18699	0.961046	0.590064	0.184562	-0.0937257	-0.226677	-0.197867	-0.0893812	0.0581034	0.138797	0.130483	-0.000859188	-0.145258	-0.231862	-0.248606	-0.10943
-0.43895	-0.233256	0.0233375	0.300773	0.535877	0.739867	0.901572	1.00309	1.0139	0.929395	0.798272	0.633757	0.495167	0.39791	0.286758	0.137212	-0.0323848	-0.214786	-0.270604	-0.185247	0.039943	0.30546	0.521008	0.625903	0.664598	0.657483	0.624755	0.606253	0.597775	0.654544	0.747395	0.850737	0.877856	0.836579	0.73714	0.670841	0.634477	0.586228	0.571551	0.455423	0.253	0.00312023	-0.188094	-0.250151	-0.193219	-0.0447962	0.122152	0.333808	0.527989	0.701945
-1.10739	-1.02101	-0.908785	-0.697663	-0.432679	-0.181083	0.125471	0.388803	0.576726	0.693742	0.728843	0.707091	0.562219	0.297756	0.0662758	-0.0419199	0.0130092	0.191484	0.351792	0.485001	0.548857	0.604483	0.71893	0.880885	1.08069	1.29668	1.48136	1.64648	1.79168	1.77961	1.69858	1.61289	1.55551	1.45592	1.27022	0.9354	0.527707	0.156578	-0.0437229	-0.0668862	0.0730417	0.293419	0.50256	0.647043	0.713243	0.702959	0.669201	0.650035	0.610371	0.574513
-0.510127	-0.516156	-0.459002	-0.369987	-0.213478	-0.0274664	0.137369	0.251244	0.303419	0.295314	0.268708	0.253602	0.22234	0.194079	0.15259	0.133186	0.142939	0.189492	0.256922	0.332215	0.381914	0.427581	0.4564	0.472209	0.487334	0.455557	0.375447	0.25435	0.142813	0.0980839	0.15445	0.208313	0.193341	0.0821488	-0.175649	-0.519282	-0.919706	-1.26695	-1.48762	-1.54263	-1.42666	-1.11138	-0.713612	-0.383081	-0.182214	-0.109912	-0.123126	-0.120714	-0.0364365	0.0638092
0.171637	0.157076	0.180077	0.255183	0.427601	0.613766	0.762412	0.762465	0.643784	0.400126	0.0623145	-0.263789	-0.505079	-0.606782	-0.630625	-0.589838	-0.466562	-0.274925	-0.0784707	0.145732	0.35301	0.472885	0.46195	0.309649	0.129376	-0.0159089	-0.0755946	0.0244256	0.177938	0.270905	0.226766	0.107789	-0.020272	-0.0569236	0.0108846	0.212559	0.448231	0.605441	0.645451	0.511335	0.267732	-0.0023666	-0.193086	-0.289762	-0.325644	-0.287904	-0.215544	-0.127538	-0.0757988	-0.0470071
0.205569	0.145579	0.0906541	0.0475962	0.0622919	0.116742	0.137414	0.157277	0.197814	0.290518	0.452352	0.633228	0.807529	0.922919	0.96297	0.969961	1.01685	1.093	1.24083	1.31642	1.25319	1.08217	0.836383	0.598126	0.399494	0.184438	0.00908525	-0.0657455	-0.0907192	-0.05664	0.0300393	0.117613	0.247215	0.40542	0.48475	0.504645	0.505277	0.467831	0.437171	0.427637	0.472534	0.487601	0.435664	0.303703	0.122444	0.0514629	0.0847371	0.244905	0.429925	0.552964
-0.0116009	0.109985	0.147984	0.174224	0.215769	0.310336	0.473042	0.65489	0.830129	0.946141	0.986407	0.993435	1.04058	1.11714	1.26576	1.34176	1.27819	1.10625	0.859138	0.619599	0.419899	0.203686	0.0273892	-0.0478442	-0.0729523	-0.0386898	0.048456	0.1365	0.266801	0.425857	0.505613	0.525616	0.526251	0.488604	0.457779	0.448193	0.493332	0.50848	0.456263	0.323593	0.141358	0.0699949	0.103448	0.264478	0.450493	0.574195	0.622328	0.587269	0.459389	0.289442
-0.197925	0.105105	0.35845	0.540603	0.579888	0.460791	0.292788	0.0897707	-0.0650232	-0.185651	-0.233358	-0.179213	-0.0538295	0.109175	0.256517	0.331654	0.354633	0.338666	0.360024	0.368052	0.353618	0.278983	0.193142	0.174264	0.126409	0.0600861	0.00770011	0.0505617	0.187396	0.426153	0.619484	0.699967	0.630535	0.428116	0.17094	-0.0294448	-0.147097	-0.170643	-0.115305	-0.0308532	0.0530507	0.104693	0.205881	0.250305	0.243006	0.149723	0.0339488	-0.0348351	-0.0446888	-0.00327128
0.24354	0.317622	0.373961	0.384084	0.380881	0.350054	0.372749	0.38128	0.365943	0.286636	0.195422	0.175362	0.124511	0.0540375	-0.00162765	0.0439169	0.189316	0.443018	0.64845	0.733971	0.660193	0.445104	0.17183	-0.0410976	-0.166114	-0.191134	-0.132332	-0.0425941	0.0465616	0.101437	0.208959	0.256163	0.248407	0.149285	0.0262641	-0.0468253	-0.0572958	-0.0132858	0.0509551	0.142307	0.211444	0.237138	0.175587	0.0111976	-0.238601	-0.497753	-0.723915	-0.825614	-0.813728	-0.717634
-0.520484	-0.373544	-0.245753	-0.193749	-0.254084	-0.355787	-0.465771	-0.543968	-0.553189	-0.452578	-0.309401	-0.206421	-0.154606	-0.11083	-0.0738086	0.00921384	0.0868378	0.0972507	-0.0156354	-0.171006	-0.28552	-0.305071	-0.20923	-0.10178	-0.0516701	-0.146233	-0.345146	-0.494047	-0.521677	-0.481011	-0.443039	-0.450931	-0.476856	-0.420372	-0.219252	0.0447679	0.196902	0.200175	0.0736083	-0.117221	-0.285362	-0.358891	-0.420068	-0.470275	-0.487204	-0.434117	-0.289898	-0.115088	0.00701522	0.0846985
-0.0605116	-0.0741627	-0.0884705	-0.0808064	-0.0127401	0.0714268	0.14681	0.171331	0.124392	0.0583721	-0.0222287	-0.0884125	-0.192322	-0.256307	-0.285659	-0.189752	0.00346091	0.187982	0.276515	0.260781	0.230265	0.248067	0.270641	0.234013	0.191373	0.0936253	-0.0334221	-0.166512	-0.247705	-0.308799	-0.32125	-0.333271	-0.288419	-0.229408	-0.12318	-0.033627	0.0609379	0.146971	0.183269	0.137919	-0.0411622	-0.322723	-0.668949	-0.905574	-0.945692	-0.73976	-0.394975	-0.0450023	0.285705	0.46602
-0.704892	-0.599021	-0.562702	-0.525703	-0.516554	-0.464006	-0.398903	-0.281708	-0.18291	-0.0785824	0.0163321	0.0563785	0.00634614	-0.191223	-0.501852	-0.883823	-1.14488	-1.18914	-0.961944	-0.581564	-0.19546	0.16939	0.36832	0.385168	0.319976	0.187338	0.0391085	-0.0604772	-0.143213	-0.192467	-0.186884	-0.204834	-0.254732	-0.377405	-0.578812	-0.765957	-0.787301	-0.574179	-0.272933	0.00984465	0.142999	0.107352	-0.0103697	-0.0904272	-0.0343069	0.170467	0.43444	0.528627	0.453981	0.212678
-0.0632366	-0.0326629	-0.026209	0.00861517	0.0508049	0.087217	0.150361	0.262549	0.417735	0.569044	0.722728	0.853669	0.930474	0.975059	0.967356	0.915452	0.904435	1.00074	1.15754	1.19163	1.08725	0.860552	0.638811	0.502765	0.502751	0.56773	0.640282	0.696234	0.759133	0.83648	0.863108	0.74615	0.5443	0.304839	0.160559	0.165952	0.264993	0.355992	0.41723	0.434099	0.424586	0.365014	0.305801	0.233075	0.1846	0.153356	0.14981	0.142804	0.146605	0.165826
-0.102559	-0.040931	0.00101595	0.0208438	-0.0207455	-0.0631207	-0.132317	-0.17844	-0.208167	-0.211541	-0.218207	-0.21459	-0.196302	-0.157056	-0.0673594	0.0342874	0.184782	0.28815	0.375013	0.461239	0.560685	0.682006	0.789931	0.84746	0.80307	0.751861	0.768081	0.881699	0.998104	1.02554	0.955043	0.75674	0.487462	0.189308	-0.138261	-0.419146	-0.586701	-0.629174	-0.503704	-0.296073	-0.039334	0.224432	0.380343	0.327016	0.0539355	-0.3049	-0.576439	-0.701645	-0.679478	-0.611076
0.501466	0.680054	0.877049	1.06959	1.15869	1.1351	1.12897	1.07351	1.00589	0.953998	1.00514	1.11096	1.2082	1.27684	1.34241	1.37057	1.38859	1.51992	1.72017	1.90202	1.95234	1.77963	1.47197	1.0927	0.81534	0.667179	0.568429	0.44253	0.318379	0.228483	0.205483	0.328502	0.626622	1.0134	1.39422	1.78172	2.12897	2.35576	2.44522	2.32793	2.08025	1.70112	1.16167	0.640278	0.221009	-0.00133283	0.00757502	0.116943	0.241488	0.211152
-1.05415	-0.94232	-0.898558	-0.924648	-0.997347	-1.06844	-1.14028	-1.20953	-1.23734	-1.21475	-1.13234	-1.02085	-0.864002	-0.687152	-0.581308	-0.601208	-0.718473	-0.856424	-0.918634	-0.869355	-0.789355	-0.738381	-0.790796	-0.902197	-1.04739	-1.2325	-1.41849	-1.58576	-1.61692	-1.48857	-1.16953	-0.743714	-0.311391	-0.0300258	0.0213795	-0.11543	-0.368325	-0.582079	-0.709936	-0.739695	-0.754962	-0.78932	-0.831685	-0.892727	-0.905162	-0.871974	-0.824095	-0.786401	-0.757329	-0.703546
-0.629511	-0.627663	-0.526242	-0.348853	-0.093187	0.144853	0.262797	0.174762	-0.0599852	-0.31497	-0.452449	-0.469117	-0.345727	-0.175121	-0.0743814	-0.0789701	-0.118266	-0.189141	-0.313417	-0.431526	-0.527362	-0.558841	-0.507748	-0.369547	-0.205546	-0.107275	-0.0175321	0.00729848	0.0687431	0.0893842	0.152878	0.317181	0.487357	0.614666	0.667636	0.634357	0.579923	0.559701	0.582175	0.651335	0.675653	0.715875	0.723312	0.701217	0.635342	0.471811	0.233093	-0.00848072	-0.151891	-0.156147
-0.40646	-0.212603	0.0251521	0.232054	0.326835	0.227629	-0.00848315	-0.264951	-0.403229	-0.419993	-0.295886	-0.124289	-0.0229631	-0.0275785	-0.067103	-0.13839	-0.263389	-0.382184	-0.478578	-0.510239	-0.45885	-0.319845	-0.154891	-0.0560478	0.0342168	0.0591917	0.120994	0.141755	0.205618	0.370876	0.542041	0.67009	0.723369	0.689896	0.635145	0.614806	0.63741	0.706973	0.731432	0.771888	0.779368	0.757145	0.690887	0.526405	0.286299	0.0433207	-0.100923	-0.105204	-0.0181706	0.0921054
-0.426003	-0.47694	-0.498862	-0.544008	-0.484982	-0.372077	-0.254	-0.190032	-0.155222	-0.160127	-0.124803	-0.111418	-0.137969	-0.216639	-0.304023	-0.350218	-0.302104	-0.181823	-0.0107639	0.240006	0.449109	0.606317	0.636497	0.565195	0.438099	0.30257	0.209749	0.143675	0.0582018	-0.0633535	-0.207201	-0.307752	-0.367297	-0.289372	-0.149947	0.0263898	0.184188	0.22104	0.244384	0.18677	0.164177	0.0865501	-0.00869238	-0.130911	-0.196162	-0.18428	-0.158009	-0.086439	-0.0616986	-0.0347037
-0.286669	-0.299501	-0.33597	-0.348358	-0.306047	-0.26476	-0.191871	-0.166674	-0.139182	-0.159615	-0.199383	-0.234476	-0.303589	-0.383893	-0.47683	-0.511296	-0.445493	-0.290734	-0.0404276	0.254846	0.410514	0.437682	0.36327	0.220372	0.136524	0.107779	0.19208	0.290669	0.352377	0.2691	0.173067	0.144199	0.321193	0.619864	0.946093	1.18965	1.27297	1.23438	1.11906	1.00003	0.902152	0.794857	0.624109	0.359731	0.0492918	-0.208994	-0.295359	-0.211411	0.0258221	0.336133
0.154103	0.218389	0.292093	0.373763	0.438176	0.435562	0.268898	-0.00495098	-0.353475	-0.591773	-0.656821	-0.578341	-0.456986	-0.39279	-0.390011	-0.393418	-0.353029	-0.282406	-0.183154	-0.116573	-0.0577311	-0.0285772	-0.00274539	-0.105058	-0.305234	-0.502442	-0.576428	-0.494721	-0.348926	-0.157536	-0.0597256	-0.0771286	-0.154669	-0.251788	-0.247621	-0.131929	0.00542074	0.0864773	0.024963	-0.0918467	-0.214014	-0.278003	-0.300283	-0.298928	-0.280492	-0.251196	-0.181884	-0.0948414	-0.000369963	0.113743
-0.410334	-0.282729	-0.108641	-0.0130896	0.0399101	0.0148225	-0.0369975	-0.0181785	0.0595269	0.182735	0.190933	0.0848375	-0.133313	-0.414317	-0.658337	-0.801219	-0.79317	-0.656546	-0.396111	-0.0980088	0.15546	0.259991	0.213404	0.0406243	-0.156887	-0.330362	-0.428065	-0.456624	-0.388275	-0.287383	-0.169376	-0.111663	-0.111262	-0.138036	-0.204967	-0.260162	-0.2554	-0.194151	-0.0743472	0.0660419	0.12384	0.0308995	-0.212249	-0.578386	-0.939044	-1.16882	-1.20312	-1.07182	-0.870893	-0.697255
-0.0785443	-0.243655	-0.414324	-0.540775	-0.612918	-0.651865	-0.746959	-0.817167	-0.842473	-0.756334	-0.572146	-0.405996	-0.300762	-0.301615	-0.376532	-0.381585	-0.314268	-0.175133	0.018365	0.171702	0.262079	0.329578	0.369178	0.383026	0.334942	0.261941	0.216155	0.224534	0.278757	0.386855	0.504729	0.51162	0.470089	0.400947	0.334319	0.319509	0.349692	0.483176	0.631469	0.717528	0.74385	0.68341	0.613029	0.587501	0.585332	0.539819	0.428458	0.213968	-0.0188208	-0.207429
1.14965	0.933237	0.604465	0.241493	-0.0893606	-0.334119	-0.485292	-0.487858	-0.420428	-0.321906	-0.265422	-0.164923	-0.0927242	-0.0258926	0.0895295	0.1857	0.284087	0.36061	0.365318	0.32035	0.27847	0.215553	0.187886	0.18458	0.0763854	-0.0434001	-0.154059	-0.141599	-0.00339278	0.186817	0.4388	0.711201	0.879262	0.900498	0.833843	0.692208	0.474103	0.271137	0.087418	0.0413064	0.0536434	0.10836	0.14331	-4.91251e-06	-0.294593	-0.670753	-1.1573	-1.57074	-1.8071	-1.80988
0.0910466	0.122988	0.0308092	-0.0761766	-0.171356	-0.155074	-0.0262615	0.151019	0.385873	0.639758	0.796395	0.816187	0.754063	0.622055	0.418777	0.229607	0.0583764	0.0153992	0.0268976	0.0778946	0.110469	-0.0231039	-0.297667	-0.648258	-1.10173	-1.48706	-1.70736	-1.70995	-1.37584	-0.893196	-0.404182	-0.0482665	0.110149	0.0872779	0.00538646	-0.0747882	-0.000402837	0.169845	0.336968	0.426413	0.389707	0.301466	0.15543	0.0459628	-0.0507671	-0.0877376	-0.162361	-0.220696	-0.244379	-0.24265
-0.724287	-0.539169	-0.326803	-0.102783	0.109977	0.348499	0.591691	0.741731	0.76069	0.701183	0.574734	0.380017	0.198815	0.0347956	-0.00637153	0.00464263	0.0534918	0.0846947	-0.043253	-0.306253	-0.642078	-1.07646	-1.44556	-1.65657	-1.65906	-1.33901	-0.8767	-0.408282	-0.0673558	0.0843874	0.0624799	-0.0159626	-0.0927605	-0.021508	0.14157	0.301654	0.387332	0.352172	0.267647	0.127762	0.0229049	-0.0697511	-0.105165	-0.176645	-0.232523	-0.255209	-0.253552	-0.244772	-0.301441	-0.355271
-0.293928	-0.345502	-0.41863	-0.48446	-0.516673	-0.520446	-0.47997	-0.474584	-0.523768	-0.550663	-0.524577	-0.399026	-0.229736	-0.139656	-0.191422	-0.310895	-0.36955	-0.258872	-0.0318334	0.206634	0.372645	0.471752	0.480621	0.428572	0.369049	0.312873	0.243196	0.172157	0.11067	0.0656577	0.0845885	0.126717	0.185434	0.200481	0.208493	0.212338	0.331532	0.480086	0.61783	0.677639	0.633642	0.542321	0.452878	0.366009	0.318554	0.326285	0.333071	0.301651	0.271758	0.254202
-0.437895	-0.334494	-0.231485	-0.125688	-0.040958	-0.0091244	-0.031283	-0.100198	-0.186436	-0.275875	-0.347462	-0.382101	-0.356926	-0.236714	-0.12185	-0.0538596	-0.0823182	-0.215262	-0.39806	-0.53476	-0.616113	-0.575482	-0.426627	-0.115703	0.178607	0.401249	0.541646	0.690161	0.789789	0.894286	0.928651	0.909687	0.831019	0.701779	0.695815	0.757713	0.818928	0.811766	0.685243	0.47708	0.219924	0.0227196	-0.0528091	0.023484	0.146271	0.235102	0.234504	0.121668	-0.102711	-0.300956
1.0959	0.968578	0.826308	0.684009	0.670197	0.73258	0.794149	0.786946	0.659691	0.450324	0.191681	-0.00666327	-0.0826286	-0.00589443	0.117603	0.206948	0.206346	0.0928577	-0.132819	-0.33221	-0.455655	-0.473874	-0.373175	-0.253546	-0.133356	-0.0651012	-0.0548699	-0.040116	-0.0516812	-0.0995021	-0.158006	-0.19576	-0.20013	-0.0979299	0.114016	0.386189	0.62377	0.773473	0.869117	0.848364	0.800072	0.716885	0.585817	0.386831	0.100799	-0.221805	-0.581349	-0.900341	-1.15623	-1.24041
0.450529	0.613909	0.696968	0.69638	0.570894	0.378693	0.137544	-0.0473849	-0.118212	-0.046668	0.0684762	0.151778	0.151217	0.0454047	-0.165008	-0.350912	-0.466008	-0.482994	-0.389106	-0.277569	-0.165508	-0.10187	-0.0923309	-0.0785749	-0.0893579	-0.133944	-0.188491	-0.223691	-0.227766	-0.132478	0.0651317	0.318895	0.540407	0.679984	0.769159	0.74981	0.704785	0.627224	0.505021	0.319494	0.0528091	-0.247975	-0.5832	-0.880616	-1.1192	-1.19768	-1.15448	-0.989639	-0.729421	-0.455763
-0.015525	-0.0324941	-0.0448429	-0.0244964	-0.0240462	-0.0743674	-0.152171	-0.197885	-0.204401	-0.174526	-0.140492	-0.186352	-0.242839	-0.270853	-0.200091	0.0397013	0.413867	0.742579	0.895015	0.771263	0.538342	0.306557	0.132943	0.0635302	0.0681572	0.11934	0.150591	0.128631	0.0585521	-0.0475532	-0.211905	-0.311374	-0.327902	-0.287773	-0.205657	-0.103842	-0.0274421	0.0262566	0.0925238	0.211459	0.37506	0.505252	0.515276	0.331622	0.0366231	-0.30772	-0.550563	-0.704557	-0.730588	-0.714516
-0.302272	-0.487284	-0.68019	-0.78895	-0.876221	-0.837341	-0.711457	-0.493562	-0.205934	0.0647372	0.214304	0.25669	0.237443	0.230679	0.335664	0.500205	0.658238	0.671187	0.561111	0.451046	0.386517	0.339401	0.346208	0.338241	0.358171	0.390019	0.443013	0.527784	0.558189	0.53333	0.392933	0.207073	0.0129561	-0.0549858	0.000916237	0.136722	0.299567	0.366072	0.276511	0.0954645	-0.150643	-0.316457	-0.402612	-0.392772	-0.330027	-0.273252	-0.212907	-0.100651	0.0839399	0.371707
-0.164634	-0.216769	-0.176154	-0.059263	0.0950284	0.260706	0.326746	0.23781	0.0580293	-0.186359	-0.351014	-0.436567	-0.426796	-0.364489	-0.308111	-0.248187	-0.136716	0.0465852	0.332342	0.641883	0.788891	0.649421	0.278411	-0.139703	-0.388524	-0.407434	-0.182823	0.17675	0.496001	0.623872	0.540082	0.354349	0.140211	-0.045014	-0.108719	-0.0385093	0.0985611	0.179765	0.174529	0.110684	0.0685903	0.0798471	0.220081	0.393745	0.640858	0.91151	1.11817	1.26971	1.35732	1.38326
-0.157381	-0.189374	-0.185553	-0.141308	0.00810315	0.174752	0.410267	0.668215	0.865172	1.0096	1.0931	1.11782	1.01461	0.748722	0.43793	0.183253	-0.0424426	-0.170172	-0.218987	-0.168536	-0.115634	-0.0461343	0.0325646	0.0850536	0.0818912	0.00993473	-0.0510252	-0.072831	-0.102294	-0.127436	-0.170726	-0.173267	-0.109237	-0.00908916	0.0511137	0.0363392	-0.0846781	-0.173118	-0.213065	-0.208058	-0.141239	-0.0232249	0.0936448	0.135551	0.0709136	-0.0650963	-0.161149	-0.242669	-0.172901	-0.0549369
-0.0691856	0.0384423	0.0749037	0.0414548	-0.0740158	-0.154214	-0.18954	-0.185112	-0.126024	-0.0216619	0.0816875	0.118745	0.061586	-0.0586893	-0.14363	-0.215719	-0.154022	-0.0497052	0.0248896	0.000435377	-0.128608	-0.249735	-0.310545	-0.266932	-0.165964	-0.0613463	0.00631785	0.0379981	0.0691112	0.0946677	0.13547	0.203488	0.298979	0.399267	0.489952	0.526103	0.534803	0.489448	0.376146	0.238497	0.0841929	-0.0426569	-0.212625	-0.39132	-0.578802	-0.717205	-0.782139	-0.71898	-0.545358	-0.32427
-1.12841	-1.16077	-1.23584	-1.31837	-1.32399	-1.24869	-1.09283	-0.942157	-0.792422	-0.664827	-0.619726	-0.568179	-0.573656	-0.560168	-0.466164	-0.383139	-0.300275	-0.198376	-0.0964071	0.0522734	0.127651	0.117775	0.0504203	-0.0284127	-0.143325	-0.252305	-0.367463	-0.463308	-0.537746	-0.562376	-0.486622	-0.405256	-0.270665	-0.13456	0.0267627	0.153141	0.291549	0.507024	0.818138	1.19581	1.43919	1.39331	1.07857	0.731711	0.475	0.425212	0.547699	0.754527	0.923281	0.992005
-0.380248	-0.235717	-0.157534	-0.0843808	0.00545446	0.0999731	0.244444	0.317688	0.308091	0.242643	0.166042	0.0543831	-0.0515108	-0.163409	-0.256539	-0.328871	-0.352803	-0.279193	-0.200131	-0.0693514	0.0629004	0.219656	0.342456	0.476945	0.686319	0.988625	1.3556	1.59209	1.54752	1.24168	0.904645	0.655202	0.606824	0.725843	0.926815	1.09079	1.15757	1.07796	0.861555	0.59118	0.508751	0.532989	0.597664	0.598717	0.468199	0.24715	0.0568829	-0.0855264	-0.140484	-0.175331
0.201343	0.0425846	-0.162681	-0.375398	-0.548682	-0.680344	-0.669199	-0.508912	-0.308308	-0.115233	-0.0016002	0.00784479	-0.0427265	-0.152739	-0.271986	-0.328242	-0.330309	-0.313957	-0.264821	-0.180643	-0.0823129	0.0552094	0.189883	0.316105	0.345504	0.293054	0.138836	0.0105964	-0.032612	0.00598085	0.166853	0.38687	0.589	0.705581	0.687584	0.57601	0.392506	0.188704	-0.0287611	-0.180322	-0.273815	-0.308572	-0.287762	-0.233008	-0.15901	-0.0934927	0.015048	0.133974	0.268377	0.316307
-0.850231	-0.664537	-0.451834	-0.213427	0.0193828	0.266201	0.443491	0.556135	0.599589	0.567545	0.550261	0.541936	0.569656	0.618292	0.674053	0.635386	0.53114	0.36788	0.255266	0.195367	0.18432	0.280196	0.438371	0.646462	0.784731	0.781431	0.625085	0.377985	0.180098	0.163401	0.309779	0.559407	0.775929	0.864789	0.825394	0.707783	0.525479	0.386624	0.383156	0.446007	0.552345	0.647038	0.679343	0.649436	0.576651	0.506981	0.469997	0.435222	0.412021	0.415498
0.0835886	-0.026644	-0.101834	-0.0894278	0.0362255	0.258574	0.517254	0.671676	0.68126	0.528337	0.299035	0.158858	0.114865	0.076508	0.0486945	0.0329708	0.0773347	0.074631	0.0283218	-0.0853284	-0.273557	-0.451814	-0.595469	-0.741285	-0.901567	-1.06102	-1.07637	-0.919686	-0.619935	-0.209503	0.220018	0.56553	0.804377	0.978308	1.11617	1.10394	0.926341	0.590386	0.202005	-0.139315	-0.283305	-0.306279	-0.231553	-0.102019	0.0504233	0.191902	0.221598	0.220528	0.170539	0.0853589
-0.0706928	0.00279719	0.0271374	-0.0689088	-0.227398	-0.35691	-0.366202	-0.201871	0.118804	0.430688	0.663877	0.728077	0.621912	0.47103	0.267512	0.187379	0.239318	0.351696	0.452578	0.472742	0.426343	0.35899	0.29254	0.250901	0.167335	0.101095	0.0959228	0.203231	0.433134	0.741679	1.01525	1.19853	1.2407	1.15741	1.09421	1.06825	1.19565	1.3748	1.53668	1.47922	1.17875	0.721973	0.194499	-0.17869	-0.387995	-0.443877	-0.389399	-0.314497	-0.184617	-0.00603825
0.838168	0.885557	0.907815	0.89679	0.84291	0.715615	0.52316	0.249076	-0.112589	-0.435643	-0.579157	-0.505108	-0.325735	-0.135026	0.0362772	0.171019	0.238113	0.219644	0.154926	0.182087	0.343208	0.57877	0.831557	0.982034	0.997963	0.876684	0.731658	0.654326	0.706683	0.897272	1.16591	1.47162	1.66343	1.6475	1.40307	1.05711	0.687083	0.398973	0.238229	0.252298	0.365315	0.583916	0.683615	0.646055	0.448333	0.135389	-0.149444	-0.310041	-0.364358	-0.294618
0.0857106	0.33482	0.571854	0.793176	0.917696	0.92241	0.805299	0.665255	0.59058	0.641138	0.825179	1.08459	1.37979	1.56502	1.54963	1.3136	0.979529	0.622211	0.343999	0.188779	0.202364	0.311498	0.522589	0.618862	0.582593	0.391664	0.0894717	-0.185575	-0.340655	-0.393105	-0.325761	-0.18753	-0.105189	-0.038161	-0.0266797	0.0220849	0.152977	0.288641	0.417538	0.528542	0.576879	0.589521	0.587991	0.567486	0.508919	0.384695	0.163211	-0.10671	-0.329671	-0.469892
-0.133959	0.122492	0.302603	0.348625	0.287862	0.145765	0.0541342	0.0319731	0.112948	0.235645	0.412874	0.623329	0.893665	1.11339	1.24167	1.24105	1.07646	0.797474	0.50389	0.327265	0.30381	0.472807	0.666915	0.850607	1.02154	1.19213	1.37821	1.54806	1.62466	1.59761	1.43445	1.25776	1.21298	1.27829	1.35164	1.45469	1.55519	1.60308	1.52226	1.33853	1.17455	0.999925	0.851334	0.733267	0.58917	0.401398	0.174981	-0.0893902	-0.204171	-0.248646
1.0255	0.765221	0.465346	0.123382	-0.180799	-0.376603	-0.521865	-0.53988	-0.470458	-0.294426	-0.0599401	0.229605	0.543593	0.779999	0.895336	0.892957	0.81544	0.737264	0.75707	0.825706	0.933025	0.948632	0.918429	0.862601	0.830259	0.850569	0.912864	0.944935	0.920298	0.897643	0.945518	1.08905	1.16922	1.139	0.925882	0.577044	0.193248	-0.152818	-0.440564	-0.738823	-0.914542	-1.00538	-0.91875	-0.767374	-0.604585	-0.490553	-0.433375	-0.411859	-0.37423	-0.339633
-0.678523	-0.669733	-0.72461	-0.884352	-0.992411	-1.05694	-0.981118	-0.848614	-0.706119	-0.606303	-0.556253	-0.53742	-0.504481	-0.474197	-0.472064	-0.513271	-0.579622	-0.634095	-0.662255	-0.686697	-0.686331	-0.614459	-0.528761	-0.390674	-0.272652	-0.19384	-0.218899	-0.282703	-0.27589	-0.164601	-0.0107747	0.111896	0.125035	0.0513156	-0.126676	-0.312771	-0.476123	-0.601363	-0.679583	-0.72411	-0.788329	-0.846662	-0.909299	-0.938454	-0.866657	-0.772022	-0.580299	-0.38171	-0.189263	-0.0479083
0.294757	0.435195	0.55319	0.610525	0.654508	0.641178	0.609396	0.537088	0.396283	0.244508	0.0939298	0.0647906	0.191801	0.44204	0.710853	0.911565	0.957746	0.826449	0.543812	0.218421	-0.039601	-0.170768	-0.145286	-0.00360811	0.15646	0.274471	0.373312	0.484059	0.660607	0.864513	1.05728	1.19116	1.16689	1.01574	0.800928	0.547976	0.394787	0.320841	0.344717	0.406001	0.441357	0.418695	0.32635	0.202859	0.140089	0.213119	0.326847	0.423535	0.412034	0.315469
0.649727	0.792129	0.955955	1.11753	1.23532	1.19618	1.02915	0.791743	0.512194	0.342897	0.261176	0.287562	0.35529	0.394363	0.369319	0.267264	0.130788	0.0614182	0.142127	0.267813	0.374668	0.361958	0.255239	0.0993835	0.0364663	-0.018528	-0.0383361	-0.0410046	-0.0058437	0.122076	0.295577	0.528755	0.740067	0.917786	0.993335	1.00406	0.955414	0.950723	1.02969	1.10211	1.08282	0.983516	0.800273	0.590859	0.358169	0.158785	-0.0205138	-0.110801	-0.113893	0.0324367
-0.788181	-0.478366	-0.180942	0.0662009	0.204128	0.28314	0.347646	0.441535	0.52697	0.520065	0.401923	0.13029	-0.157277	-0.422487	-0.488383	-0.38341	-0.168925	-0.0115928	0.043136	-0.0778968	-0.260048	-0.371154	-0.464663	-0.510175	-0.52183	-0.412928	-0.249995	-0.134006	-0.106257	-0.157463	-0.223347	-0.322761	-0.404111	-0.455907	-0.530674	-0.58308	-0.590016	-0.527069	-0.394461	-0.189033	0.0435514	0.276204	0.362684	0.23735	-0.104653	-0.500863	-0.77725	-0.829053	-0.731612	-0.519027
0.0885428	0.146622	0.17161	0.176024	0.152761	0.0952925	0.0311921	-0.0336311	-0.106899	-0.168919	-0.204293	-0.193769	-0.188865	-0.200395	-0.248897	-0.343209	-0.407015	-0.467791	-0.454353	-0.41955	-0.389224	-0.33842	-0.293497	-0.243973	-0.18873	-0.141118	-0.0811728	0.00747824	0.130758	0.216094	0.263671	0.238457	0.101595	-0.0775388	-0.229716	-0.251808	-0.184762	-0.0338339	0.0919815	0.160064	0.1776	0.196041	0.269171	0.381635	0.522418	0.62095	0.630067	0.51589	0.383384	0.26172
-0.163327	-0.257229	-0.385061	-0.458988	-0.371503	-0.12766	0.2772	0.65475	0.867776	0.885193	0.794889	0.66413	0.515335	0.365761	0.255392	0.105056	-0.00713158	-0.0902381	-0.121476	-0.133331	-0.122001	-0.0573262	0.0402713	0.155542	0.203143	0.226463	0.215837	0.185108	0.188359	0.249246	0.366202	0.468704	0.51839	0.490674	0.447178	0.386466	0.371804	0.382856	0.407493	0.396648	0.359721	0.360262	0.454169	0.526507	0.567466	0.563562	0.491853	0.408919	0.290341	0.210693
-0.113461	-0.0846344	-0.0441623	0.0254312	0.0516914	0.0576035	0.0474226	0.01798	0.0210952	0.0794328	0.191492	0.289702	0.337309	0.310753	0.269077	0.210908	0.196859	0.207449	0.231055	0.220663	0.185283	0.185801	0.275776	0.345085	0.384329	0.380589	0.311882	0.23242	0.118807	0.0424935	0.0450455	0.133875	0.30055	0.555588	0.790408	0.958198	0.982908	0.880163	0.769413	0.625847	0.456563	0.337975	0.230083	0.0735237	-0.11657	-0.349882	-0.451808	-0.43254	-0.337227	-0.291053
0.312557	0.221605	0.134841	0.0191716	-0.0595551	-0.0573115	0.0398787	0.222242	0.501286	0.758208	0.941793	0.968828	0.856412	0.735237	0.578158	0.39294	0.26319	0.145143	-0.0261528	-0.234139	-0.489412	-0.600932	-0.57985	-0.475565	-0.425045	-0.413184	-0.443441	-0.494419	-0.475374	-0.403584	-0.356395	-0.391166	-0.519635	-0.764438	-1.05798	-1.34883	-1.42263	-1.351	-1.18145	-1.003	-0.915037	-0.906233	-0.896938	-0.823827	-0.713618	-0.507887	-0.254114	0.041914	0.264791	0.412972
0.438199	0.508512	0.522821	0.458616	0.386848	0.312254	0.238168	0.103709	-0.0750465	-0.269393	-0.422786	-0.476494	-0.469119	-0.39737	-0.362339	-0.319693	-0.241332	-0.225073	-0.283456	-0.341295	-0.387337	-0.446375	-0.473369	-0.49088	-0.468175	-0.449746	-0.403822	-0.340347	-0.3482	-0.391719	-0.469307	-0.554507	-0.642896	-0.684328	-0.659871	-0.618092	-0.524236	-0.397796	-0.204993	0.0594415	0.300405	0.43659	0.388759	0.196576	-0.0892383	-0.303012	-0.438055	-0.472076	-0.368981	-0.21142
-0.38284	-0.364723	-0.299481	-0.178563	-0.0701558	-0.027782	-0.0591677	-0.0933318	-0.0614772	0.0308032	0.112422	0.163058	0.198387	0.199795	0.192026	0.134107	0.0338926	-0.195801	-0.508685	-0.806029	-0.946594	-0.97937	-0.884672	-0.614703	-0.260262	0.0847622	0.314814	0.382351	0.328766	0.224165	0.0532823	-0.0784386	-0.17579	-0.259659	-0.328318	-0.345974	-0.313395	-0.241182	-0.151562	-0.0342493	0.102423	0.198248	0.198187	0.0759008	-0.15092	-0.359327	-0.462947	-0.436623	-0.253005	0.00867004
-0.584698	-0.363857	-0.0691876	0.244808	0.37346	0.367651	0.278749	0.28181	0.359223	0.470181	0.574992	0.517548	0.345284	0.0998229	-0.0697718	-0.166836	-0.124253	0.00802495	0.163743	0.310052	0.303761	0.219349	-0.0457726	-0.338275	-0.609847	-0.730961	-0.574179	-0.234002	0.179288	0.406765	0.46467	0.367519	0.21689	0.143335	0.224575	0.417411	0.632504	0.768525	0.725172	0.675445	0.612138	0.66857	0.846529	1.17075	1.56937	1.86844	1.94268	1.8759	1.69529	1.47292
-1.1829	-0.982018	-0.739819	-0.553532	-0.405367	-0.366863	-0.321489	-0.221361	0.0483492	0.407976	0.781746	1.07753	1.23006	1.2828	1.26649	1.20427	1.08796	0.972325	0.90061	0.872731	0.877587	0.927872	1.02001	1.08152	1.06585	0.951235	0.766182	0.567979	0.401603	0.300207	0.233689	0.199199	0.147396	0.118726	0.0767587	0.0550126	0.0276518	-0.0493425	-0.146811	-0.234163	-0.269308	-0.216009	-0.11484	-0.0505435	0.0500127	0.0959169	0.200844	0.339926	0.478772	0.625607
-0.045998	-0.101711	-0.1271	-0.163388	-0.18168	-0.206121	-0.276398	-0.365362	-0.445093	-0.477171	-0.428523	-0.336181	-0.277494	-0.185711	-0.143812	-0.0480395	0.0789077	0.20564	0.339663	0.404509	0.45384	0.480183	0.429765	0.312323	0.192394	0.0992719	0.0973259	0.225529	0.485766	0.776523	0.943692	1.00669	0.96612	0.955133	0.949312	0.937823	0.852729	0.735657	0.626453	0.593592	0.597553	0.622209	0.639416	0.628986	0.581481	0.441807	0.178352	-0.135644	-0.393844	-0.530965
-0.742718	-0.532299	-0.390176	-0.298705	-0.326756	-0.357341	-0.387354	-0.278488	-0.140661	-0.0730098	-0.103968	-0.177804	-0.18313	-0.103925	0.0600639	0.27314	0.457727	0.548595	0.508487	0.321659	0.0267245	-0.301143	-0.552117	-0.627593	-0.581297	-0.449241	-0.293523	-0.164293	-0.0320288	0.0692846	0.140797	0.191304	0.234993	0.233532	0.221359	0.145113	0.00468437	-0.178099	-0.311858	-0.411594	-0.458602	-0.48757	-0.500488	-0.51605	-0.479229	-0.373399	-0.217	-0.0707472	0.00869423	0.00554199
-0.199622	-0.265507	-0.30749	-0.345932	-0.366739	-0.392795	-0.351654	-0.233408	-0.0586588	0.104753	0.193515	0.189993	0.116827	-0.0135751	-0.173056	-0.306064	-0.387136	-0.361325	-0.21221	-0.0371325	0.106596	0.192985	0.211537	0.17765	0.116329	0.0506552	0.0254772	0.00313453	0.0240529	0.102905	0.256628	0.389345	0.541063	0.602056	0.562272	0.386204	0.0969498	-0.227546	-0.531442	-0.786015	-0.961007	-0.97708	-0.858876	-0.687603	-0.51639	-0.401061	-0.342965	-0.303309	-0.177438	0.0392252
-0.0344323	-0.215422	-0.344845	-0.490212	-0.623805	-0.812489	-0.974257	-1.06485	-1.12422	-1.20873	-1.26174	-1.25357	-1.18101	-1.06292	-0.892997	-0.707801	-0.553498	-0.502686	-0.546184	-0.674142	-0.812969	-0.9282	-0.985152	-0.949379	-0.797785	-0.585097	-0.316703	-0.0134758	0.267088	0.537716	0.712012	0.756675	0.706834	0.596507	0.512687	0.470664	0.456545	0.414347	0.397241	0.401098	0.374774	0.290231	0.0646307	-0.235659	-0.570033	-0.799749	-0.84519	-0.796917	-0.694142	-0.534747
-0.341376	-0.315019	-0.285139	-0.213878	-0.0916038	0.057431	0.165977	0.176855	0.138638	0.0771267	0.0227542	-0.030084	-0.059056	-0.0753452	-0.00177934	0.0941697	0.186754	0.192286	0.12191	-0.0065066	-0.0401824	-0.0082099	0.0835313	0.180866	0.274518	0.369093	0.488252	0.615842	0.688748	0.682385	0.584705	0.435163	0.314926	0.250528	0.283442	0.359022	0.40149	0.375418	0.266725	0.105533	-0.0933588	-0.269184	-0.385827	-0.422523	-0.398847	-0.350601	-0.326835	-0.362621	-0.524363	-0.794666
-0.153357	-0.0659511	0.0327065	0.0989199	0.116616	0.0929723	0.083278	0.163979	0.359932	0.601187	0.836634	1.00815	1.06663	1.05813	1.02292	1.03754	1.08568	1.10552	1.04588	0.909549	0.733915	0.551585	0.390174	0.231015	0.0917311	-0.0448677	-0.148746	-0.172897	-0.132869	-0.0316643	0.15551	0.414931	0.716015	0.962336	1.03408	1.01178	0.842443	0.610505	0.379992	0.213424	0.139038	0.166521	0.250319	0.34224	0.36659	0.271228	0.160679	0.0866345	0.127549	0.234463
0.998726	0.982057	0.976496	0.927638	0.755592	0.472453	0.0518199	-0.385796	-0.633099	-0.607486	-0.288959	0.174343	0.529298	0.647247	0.580271	0.400012	0.336152	0.397242	0.525334	0.551309	0.428231	0.171957	-0.100822	-0.334783	-0.523018	-0.641302	-0.627211	-0.513304	-0.329526	-0.0556463	0.131098	0.173942	0.0635731	-0.115002	-0.23958	-0.346324	-0.46908	-0.510979	-0.506209	-0.440704	-0.339041	-0.265304	-0.315318	-0.403074	-0.442229	-0.469948	-0.473846	-0.50341	-0.57301	-0.599349
0.421167	0.29219	0.173291	0.175421	0.266964	0.401305	0.425039	0.312582	0.0784254	-0.170812	-0.384582	-0.556571	-0.664647	-0.651772	-0.547696	-0.379778	-0.129535	0.0410932	0.0802396	-0.0206045	-0.183768	-0.297595	-0.395127	-0.507289	-0.545571	-0.541213	-0.481362	-0.388472	-0.321099	-0.366796	-0.446979	-0.482755	-0.508082	-0.511643	-0.538656	-0.602249	-0.626315	-0.501162	-0.317466	-0.136915	-0.135578	-0.251429	-0.432079	-0.660653	-0.844988	-1.02785	-1.18571	-1.3197	-1.39356	-1.37691
-0.811014	-0.689938	-0.585622	-0.482105	-0.475951	-0.538111	-0.662421	-0.725009	-0.74769	-0.664555	-0.543517	-0.420807	-0.317643	-0.252448	-0.203495	-0.152639	-0.0357864	0.15272	0.378227	0.614076	0.769321	0.843173	0.77987	0.641118	0.516143	0.441434	0.303659	0.12724	-0.0986701	-0.29249	-0.37936	-0.350147	-0.192093	0.0199664	0.209457	0.323064	0.354771	0.367236	0.322562	0.208913	0.133403	0.114419	0.141723	0.173985	0.0894261	-0.119368	-0.386209	-0.566539	-0.547751	-0.337262
-0.158918	-0.0953257	-0.00121383	0.0948603	0.160142	0.0758914	-0.161687	-0.465314	-0.670505	-0.649127	-0.409619	-0.0415703	0.440878	0.829628	1.09945	1.22318	1.19536	1.01925	0.829142	0.720222	0.629431	0.553149	0.435217	0.23131	0.0280382	-0.215211	-0.254864	-0.0821363	0.170059	0.41021	0.479442	0.348256	0.0188323	-0.367778	-0.674655	-0.728034	-0.540802	-0.148445	0.232631	0.507963	0.631045	0.648194	0.636866	0.633256	0.573748	0.483693	0.362123	0.239418	0.100874	-0.0849129
0.484422	0.271773	0.114688	0.131649	0.224868	0.315968	0.325164	0.24844	0.136791	0.016827	-0.0348106	0.00598051	0.109472	0.0942457	-0.00215865	-0.167004	-0.316363	-0.429128	-0.484666	-0.413056	-0.249131	-0.0417009	0.107175	0.0942154	0.0151694	-0.0963627	-0.175167	-0.182062	-0.156497	-0.11729	-0.106442	-0.146517	-0.226381	-0.289149	-0.283203	-0.243191	-0.106305	0.0487592	0.238319	0.393478	0.523913	0.593325	0.571149	0.511289	0.411673	0.230613	-0.0647887	-0.299331	-0.357173	-0.252748
0.319572	0.149265	0.0314971	-0.0777569	-0.14216	-0.142607	-0.119271	-0.0834818	-0.0735791	-0.110161	-0.183063	-0.240359	-0.234931	-0.198408	-0.073454	0.0680927	0.241128	0.382761	0.501826	0.565187	0.544945	0.490303	0.399371	0.234094	-0.0355569	-0.249654	-0.302453	-0.207131	-0.00527236	0.189238	0.310379	0.309745	0.27648	0.238106	0.247559	0.305289	0.369893	0.481756	0.452787	0.329401	0.151271	0.00377712	-0.0427359	0.00500841	0.0655879	0.1332	0.224835	0.328216	0.430164	0.446544
0.397307	0.343449	0.31787	0.270605	0.243957	0.296887	0.402558	0.497318	0.51984	0.45629	0.362902	0.261739	0.198188	0.119897	0.0440744	-0.0313659	-0.031193	-0.0122911	0.0569932	0.0948325	0.0631	-0.0871382	-0.207683	-0.242736	-0.150128	-0.0266615	0.0783702	0.168592	0.193581	0.175083	0.0992957	0.0283858	-0.0722523	-0.0993532	-0.0516987	0.0855734	0.216351	0.317815	0.361982	0.352147	0.299237	0.277997	0.310429	0.32052	0.28276	0.201528	0.128218	0.0594358	0.0550689	0.0434415
0.559333	0.209098	-0.142129	-0.366763	-0.424485	-0.31448	-0.166986	-0.0572051	0.00515647	0.0415332	0.0940017	0.129164	0.0677684	-0.0650829	-0.203451	-0.230481	-0.079168	0.19073	0.440162	0.625343	0.626747	0.538145	0.407225	0.341304	0.373742	0.541853	0.788038	1.03606	1.22465	1.32811	1.34397	1.18606	0.943466	0.632524	0.37673	0.15974	-0.0088649	-0.128982	-0.178026	-0.162097	-0.0679876	0.0562303	0.100285	0.0827786	0.0687008	0.143058	0.301094	0.452257	0.534264	0.515044
0.134748	0.0155913	-0.0949913	-0.137445	-0.139948	-0.131387	-0.166309	-0.256794	-0.43773	-0.636546	-0.783996	-0.8358	-0.779378	-0.684157	-0.504191	-0.354244	-0.277535	-0.301279	-0.380757	-0.519961	-0.603136	-0.572324	-0.514854	-0.521988	-0.683099	-0.934855	-1.18598	-1.27696	-1.16502	-0.867489	-0.486247	-0.127055	0.112582	0.223064	0.149539	-0.0649679	-0.364362	-0.641443	-0.82304	-0.909208	-0.969764	-0.980201	-0.957916	-0.916401	-0.830102	-0.783853	-0.801914	-0.895751	-0.970248	-0.957888
0.131181	-0.160723	-0.506447	-0.864568	-1.16858	-1.27264	-1.14607	-0.809657	-0.378587	0.0275519	0.298509	0.423432	0.340297	0.0977537	-0.240771	-0.554067	-0.759398	-0.856829	-0.925299	-0.9371	-0.911903	-0.864962	-0.767384	-0.71509	-0.735512	-0.841613	-0.925847	-0.911871	-0.725938	-0.526671	-0.349784	-0.264666	-0.208951	-0.221213	-0.259259	-0.290241	-0.290499	-0.265795	-0.218922	-0.139629	-0.0945167	-0.0571584	-0.0397771	0.022141	0.170374	0.332442	0.399926	0.302979	0.0329328	-0.274683
0.649758	0.633191	0.655429	0.765632	0.894244	0.961142	0.955897	0.961642	1.03506	1.23138	1.52712	1.78985	1.91368	1.79177	1.54872	1.32235	1.16923	1.12165	1.12683	1.18443	1.19771	1.17528	1.13242	1.08779	1.08525	1.19835	1.37809	1.49346	1.51072	1.39605	1.25406	1.10683	0.938572	0.799367	0.629345	0.40535	0.22839	0.180711	0.192376	0.251057	0.241658	0.199956	0.130955	0.0738973	0.0326807	0.0252457	0.0486233	0.01048	-0.0129196	-0.0434199
0.130348	0.0607728	0.003083	-0.00596535	-0.0374218	-0.0318795	0.00673705	0.0547709	0.101082	0.14377	0.182562	0.242068	0.349044	0.485632	0.647885	0.712536	0.672166	0.518983	0.254518	-0.0369452	-0.230587	-0.326211	-0.40465	-0.475585	-0.566083	-0.664365	-0.753399	-0.842201	-0.881681	-0.82447	-0.688929	-0.451218	-0.126474	0.144876	0.284296	0.290818	0.194372	0.167065	0.207972	0.267712	0.318548	0.184815	-0.152047	-0.575529	-1.00349	-1.26489	-1.26772	-1.02005	-0.72146	-0.499916
0.424691	0.254239	0.0681635	-0.0448448	-0.0713323	-0.0515619	-0.0230452	-0.0181018	-0.077392	-0.195539	-0.315919	-0.392093	-0.398215	-0.355824	-0.290051	-0.20253	-0.110628	-0.0336336	0.0631129	0.171446	0.32169	0.452938	0.587391	0.661903	0.618979	0.517787	0.413361	0.341697	0.29506	0.249134	0.178028	0.141351	0.0679307	-0.0114825	-0.151775	-0.262657	-0.270043	-0.169147	0.0121893	0.232731	0.335318	0.293306	0.156035	-0.0279442	-0.17409	-0.214197	-0.238455	-0.225816	-0.204777	-0.225431
-1.06643	-0.911526	-0.730437	-0.549631	-0.39327	-0.291918	-0.271006	-0.303831	-0.386549	-0.478723	-0.534295	-0.566639	-0.557416	-0.581501	-0.567085	-0.4696	-0.363947	-0.286124	-0.24846	-0.262103	-0.297575	-0.275077	-0.169347	0.02464	0.203526	0.256583	0.183862	0.0439768	-0.0993237	-0.223823	-0.318307	-0.388376	-0.489388	-0.587245	-0.662633	-0.630626	-0.492441	-0.329176	-0.185447	-0.202569	-0.378728	-0.617645	-0.864479	-0.987981	-0.941675	-0.780853	-0.594919	-0.485285	-0.590674	-0.762098
-0.506666	-0.346256	-0.237996	-0.168252	-0.140006	-0.161356	-0.199143	-0.175177	-0.0625491	0.144093	0.33465	0.391167	0.313702	0.164691	0.0120421	-0.120579	-0.221227	-0.295868	-0.403469	-0.507711	-0.588017	-0.553922	-0.406721	-0.232805	-0.0796995	-0.097939	-0.285589	-0.540094	-0.80303	-0.93459	-0.885262	-0.713949	-0.515885	-0.399098	-0.511363	-0.69397	-0.834507	-0.846903	-0.691865	-0.466875	-0.204867	0.00634404	0.132207	0.0592708	-0.109399	-0.301476	-0.385702	-0.360427	-0.3085	-0.342626
0.034843	-0.105011	-0.121746	-0.0255366	0.157858	0.337675	0.392103	0.317502	0.174001	0.0269963	-0.100721	-0.197648	-0.269528	-0.373151	-0.473538	-0.550875	-0.51804	-0.376283	-0.208798	-0.0613531	-0.0789181	-0.25963	-0.504724	-0.757938	-0.884633	-0.837129	-0.672151	-0.48141	-0.368942	-0.477055	-0.65291	-0.78825	-0.800189	-0.650883	-0.434213	-0.181892	0.0215089	0.142718	0.0724786	-0.0899548	-0.274929	-0.356041	-0.331701	-0.281693	-0.314558	-0.451159	-0.56369	-0.566658	-0.39077	-0.165476
-0.472918	-0.555835	-0.599031	-0.543528	-0.39604	-0.229629	-0.0862493	-0.10333	-0.27906	-0.517396	-0.763629	-0.886831	-0.840637	-0.680207	-0.494726	-0.385357	-0.490491	-0.661497	-0.793106	-0.804715	-0.659526	-0.448829	-0.203465	-0.00567178	0.112195	0.0438927	-0.114062	-0.293937	-0.372813	-0.349143	-0.300515	-0.332473	-0.465308	-0.574736	-0.577623	-0.406585	-0.187502	-0.0202621	0.0837633	0.0809778	0.0591775	0.0377033	0.0641056	0.16021	0.347597	0.541897	0.734829	0.855581	0.859483	0.745121
-0.687741	-0.613987	-0.471846	-0.263021	-0.0401225	0.124806	0.157691	0.11252	0.0339045	-0.0448241	-0.0784312	-0.0510375	0.0326845	0.121151	0.179223	0.141995	0.0123843	-0.157375	-0.28448	-0.280689	-0.196092	-0.165549	-0.223166	-0.330626	-0.418232	-0.469991	-0.443625	-0.397941	-0.284294	-0.22695	-0.154388	-0.0524051	0.0869004	0.220445	0.327321	0.386704	0.405048	0.390778	0.358629	0.407958	0.466804	0.489526	0.441966	0.433607	0.480635	0.631282	0.789913	0.835469	0.740708	0.48311
0.232618	0.392633	0.570337	0.812342	1.02657	1.08619	0.973995	0.669012	0.318038	0.0633234	-0.0509324	-0.064516	0.0030258	0.0688371	0.0444422	-0.111247	-0.265566	-0.306784	-0.252093	-0.165395	-0.134768	-0.102069	-0.0803928	-0.0149477	0.0397096	0.0290278	-0.0197419	-0.0359856	-0.047219	-0.0641789	-0.0742707	-0.116786	-0.14276	-0.189529	-0.204966	-0.187588	-0.16454	-0.0921777	0.0432479	0.142303	0.304019	0.418378	0.488318	0.485384	0.398365	0.248846	0.0859909	-0.0778412	-0.209484	-0.255185
0.0301142	0.0649038	0.0443233	-0.0362706	-0.173521	-0.289392	-0.362614	-0.324743	-0.209303	0.0573599	0.375367	0.655592	0.846258	0.954354	0.943583	0.816129	0.621988	0.467957	0.434077	0.561162	0.825301	1.08525	1.2741	1.2159	1.02038	0.762425	0.628274	0.678327	0.877079	1.05923	1.05124	0.896218	0.596442	0.363328	0.230885	0.236627	0.334731	0.491012	0.72175	0.977275	1.16422	1.17137	0.984973	0.626304	0.243634	-0.0288139	-0.164315	-0.245378	-0.329345	-0.533736
0.439376	0.347284	0.297517	0.240776	0.190726	0.102082	0.0196879	-0.0846336	-0.135929	-0.209772	-0.311929	-0.309634	-0.254052	-0.174032	-0.146842	-0.29394	-0.545973	-0.782749	-0.870716	-0.727961	-0.447287	-0.16809	-0.0392505	-0.0664078	-0.176109	-0.190553	-0.121779	0.0792314	0.37158	0.630966	0.822673	0.876845	0.795103	0.605983	0.311772	-0.0245008	-0.27383	-0.328711	-0.232582	-0.103736	-0.0641993	-0.160702	-0.348998	-0.545624	-0.611417	-0.48246	-0.173765	0.12865	0.306848	0.311773
0.0403487	0.0676708	0.066502	0.0453515	-0.0039954	-0.0483024	-0.0820288	-0.116037	-0.126133	-0.176419	-0.164669	-0.0411774	0.140528	0.282525	0.315893	0.190993	-0.0210252	-0.215029	-0.316714	-0.274827	-0.145927	-0.0218939	-0.00411224	0.00607255	0.0375796	0.129512	0.289036	0.407268	0.437016	0.347774	0.170998	-0.00762413	-0.134106	-0.193397	-0.206476	-0.146133	-0.00935915	0.169091	0.294836	0.292052	0.158969	-0.0734683	-0.287805	-0.39447	-0.373317	-0.276142	-0.164111	-0.0895995	-0.0602467	-0.053685
0.0654609	0.135851	0.207065	0.234614	0.223664	0.132749	0.0426077	-0.102617	-0.218894	-0.274629	-0.256912	-0.196386	-0.21535	-0.276029	-0.350479	-0.336541	-0.199265	0.0427312	0.21471	0.280082	0.193377	0.0354291	-0.136065	-0.336061	-0.482581	-0.572966	-0.591116	-0.545292	-0.431938	-0.368443	-0.30189	-0.273086	-0.252517	-0.221301	-0.225814	-0.20046	-0.11594	0.00467329	0.166285	0.362952	0.429768	0.424715	0.305661	0.195462	0.0779131	0.0219111	0.0336155	0.0577107	0.0367931	0.0364833
-0.333746	-0.147339	0.114902	0.411685	0.652182	0.724514	0.581351	0.26267	-0.0710851	-0.309731	-0.444719	-0.45282	-0.330277	-0.176467	-0.0312148	0.0324644	0.0522536	0.0407912	0.00171521	0.0109608	0.059671	0.0954257	0.0697108	0.0300839	0.0539498	0.207947	0.425096	0.625504	0.73435	0.745671	0.736307	0.75187	0.821317	0.905891	0.905444	0.848055	0.801827	0.731827	0.749665	0.82909	0.858041	0.735269	0.4819	0.148033	-0.161228	-0.411394	-0.520237	-0.373535	-0.0856246	0.243487
0.0317162	0.025245	0.0157539	0.0250975	0.0413969	0.0679812	0.122707	0.253581	0.428399	0.53786	0.504678	0.302307	-0.0391094	-0.391561	-0.608828	-0.693695	-0.656384	-0.47606	-0.234675	0.0289772	0.26719	0.417405	0.521183	0.637008	0.834157	1.04333	1.12967	0.958384	0.583694	0.134251	-0.292871	-0.552724	-0.608462	-0.548522	-0.393634	-0.209376	-0.0238121	0.2199	0.427256	0.594886	0.635074	0.542771	0.436577	0.408965	0.483738	0.666434	0.845258	0.913505	0.933062	0.929106
0.199258	0.174735	0.0906372	-0.0251392	-0.13824	-0.182261	-0.196454	-0.143389	0.000703349	0.200456	0.328762	0.343426	0.247729	0.146388	0.0331008	0.00230729	0.0345438	0.133719	0.248849	0.2565	0.159774	-0.0226417	-0.195016	-0.351872	-0.492318	-0.570243	-0.557965	-0.478836	-0.299229	-0.0858139	0.0587301	0.10298	0.091375	0.0338165	0.0671657	0.212139	0.468708	0.75387	0.926811	0.871195	0.575529	0.166906	-0.243908	-0.56303	-0.820236	-0.939366	-0.982691	-0.99816	-1.01125	-0.968198
-0.171539	-0.0835554	0.0319776	0.140663	0.143212	0.0446428	-0.133746	-0.302315	-0.455707	-0.593052	-0.669257	-0.657251	-0.579868	-0.404227	-0.195523	-0.0541702	-0.0108969	-0.022246	-0.0785338	-0.0459209	0.095852	0.346756	0.625623	0.794746	0.740358	0.451219	0.0516175	-0.350127	-0.662203	-0.913731	-1.03023	-1.0726	-1.08773	-1.10053	-1.05843	-0.931716	-0.701752	-0.431896	-0.252462	-0.240062	-0.333339	-0.460799	-0.533269	-0.553752	-0.530559	-0.513822	-0.519553	-0.542694	-0.522095	-0.478286
-0.187972	-0.0991994	0.0916428	0.365722	0.651514	0.828408	0.770973	0.465637	0.0436493	-0.380601	-0.71016	-0.975778	-1.09881	-1.14355	-1.15952	-1.17305	-1.12858	-0.994771	-0.751924	-0.466951	-0.277464	-0.26437	-0.362872	-0.497473	-0.574003	-0.595633	-0.571141	-0.553466	-0.559518	-0.583955	-0.562202	-0.515939	-0.507761	-0.518609	-0.58137	-0.573942	-0.485663	-0.328406	-0.121861	0.0317586	0.0921902	0.0203058	-0.173436	-0.45984	-0.743649	-1.00562	-1.1686	-1.21858	-1.24269	-1.25291
-0.419933	-0.517379	-0.658166	-0.811931	-0.981252	-1.07116	-1.11313	-1.12811	-1.14079	-1.09909	-0.973586	-0.745812	-0.478528	-0.300803	-0.288522	-0.380909	-0.507155	-0.578935	-0.599223	-0.576251	-0.559673	-0.56535	-0.58827	-0.567867	-0.524476	-0.516804	-0.526979	-0.585845	-0.578878	-0.496078	-0.348583	-0.154857	-0.0107733	0.0459072	-0.0215153	-0.203232	-0.471858	-0.738051	-0.983761	-1.13662	-1.1835	-1.20611	-1.2157	-1.22079	-1.20109	-1.12402	-1.05733	-0.990554	-0.937249	-0.903541
-1.25456	-1.09815	-0.896461	-0.632709	-0.357671	-0.17864	-0.166546	-0.257522	-0.381837	-0.452519	-0.472497	-0.449876	-0.433552	-0.439142	-0.461712	-0.441621	-0.398893	-0.391339	-0.401358	-0.459324	-0.452463	-0.370929	-0.225689	-0.0349255	0.106956	0.16277	0.0963778	-0.0825603	-0.34708	-0.609203	-0.851156	-1.00168	-1.04784	-1.07011	-1.07955	-1.08456	-1.06517	-0.98927	-0.9236	-0.857845	-0.805355	-0.772162	-0.656872	-0.481926	-0.310869	-0.16775	-0.11236	-0.127168	-0.175643	-0.215162
0.567524	0.251988	0.00653028	-0.123286	-0.170059	-0.175334	-0.0987561	0.0657111	0.222721	0.331145	0.292664	0.0925706	-0.205332	-0.499921	-0.683728	-0.722268	-0.608886	-0.401177	-0.228244	-0.16533	-0.221282	-0.370338	-0.501119	-0.549233	-0.511457	-0.402163	-0.281284	-0.113157	0.0719	0.231782	0.330545	0.364225	0.312847	0.291536	0.346252	0.411317	0.464961	0.354323	0.150829	-0.0728089	-0.213402	-0.227377	-0.116346	0.0570713	0.19347	0.299096	0.316401	0.228565	0.102891	-0.0290363
0.816999	0.725166	0.599821	0.551483	0.546331	0.599352	0.620153	0.666708	0.715136	0.71587	0.651538	0.524157	0.315796	0.0844642	-0.0251319	0.075713	0.371185	0.766418	1.11852	1.27161	1.19567	1.00414	0.742511	0.537787	0.46383	0.516615	0.65545	0.781064	0.810367	0.684218	0.46639	0.327382	0.244578	0.244876	0.296142	0.394164	0.507526	0.648175	0.733031	0.731613	0.631256	0.497914	0.307134	0.0933494	-0.106254	-0.202781	-0.250898	-0.251	-0.310834	-0.434244
1.36179	1.36935	1.26641	1.06187	0.828285	0.557903	0.357139	0.284612	0.336376	0.472526	0.595711	0.624447	0.500738	0.287123	0.150803	0.0696002	0.0698924	0.120167	0.216293	0.327463	0.465392	0.548607	0.547216	0.4488	0.318037	0.130946	-0.0787042	-0.274448	-0.369108	-0.416295	-0.416395	-0.475071	-0.596095	-0.706321	-0.730141	-0.619082	-0.540803	-0.543804	-0.6477	-0.790314	-0.899774	-0.897209	-0.846278	-0.730952	-0.540791	-0.353476	-0.222453	-0.2163	-0.294265	-0.331279
-0.65046	-0.594244	-0.562938	-0.513419	-0.407644	-0.286771	-0.162497	-0.106809	-0.150724	-0.313941	-0.540474	-0.697558	-0.706205	-0.597705	-0.414784	-0.191324	0.013873	0.183556	0.328313	0.395287	0.403812	0.362245	0.29881	0.230962	0.19484	0.199905	0.305076	0.473805	0.644098	0.799161	0.869999	0.812375	0.673634	0.537509	0.491865	0.598063	0.766081	0.953715	1.05734	1.05327	0.941311	0.799741	0.681719	0.600458	0.566684	0.559149	0.612724	0.666198	0.696079	0.711813
0.0994444	0.106419	0.074644	-0.0219938	-0.21092	-0.450641	-0.614228	-0.623234	-0.510242	-0.319747	-0.0870352	0.126657	0.303365	0.454116	0.523862	0.532741	0.489453	0.423391	0.352734	0.315117	0.320391	0.429916	0.605632	0.782975	0.944458	1.01823	0.958219	0.813734	0.671972	0.624439	0.735033	0.910008	1.10541	1.21332	1.20908	1.09249	0.945061	0.822154	0.737528	0.702356	0.694509	0.750302	0.80599	0.837108	0.853493	0.79057	0.74003	0.709423	0.720109	0.700277
0.872858	0.736846	0.657068	0.667669	0.811621	1.00902	1.2143	1.32767	1.32321	1.20073	1.04584	0.916722	0.827819	0.790868	0.782624	0.841238	0.899741	0.932432	0.949645	0.883542	0.830447	0.798292	0.809518	0.788684	0.759512	0.685626	0.582412	0.413874	0.229391	0.109579	0.0307583	0.0407423	0.106819	0.225217	0.388228	0.55371	0.682441	0.803614	0.860491	0.891547	0.887678	0.824493	0.722735	0.672145	0.640173	0.611173	0.552387	0.496123	0.462227	0.470911
1.05028	1.21734	1.33259	1.32949	1.15205	0.799329	0.272752	-0.229537	-0.658076	-0.861402	-0.940334	-0.851182	-0.734697	-0.708963	-0.745163	-0.745365	-0.715837	-0.603773	-0.494508	-0.365951	-0.22479	-0.165403	-0.198101	-0.301054	-0.391062	-0.413337	-0.368982	-0.200724	0.06496	0.297735	0.428209	0.404404	0.274558	0.161025	0.170203	0.287776	0.460876	0.59514	0.670302	0.675225	0.60184	0.44019	0.241696	0.0280949	-0.207189	-0.473876	-0.78613	-1.03815	-1.16125	-1.05471
0.276642	0.0458272	-0.148679	-0.266917	-0.299136	-0.27076	-0.13382	0.0824144	0.271864	0.378054	0.35868	0.253001	0.160599	0.168069	0.263759	0.404641	0.513915	0.575088	0.579095	0.519368	0.387805	0.226256	0.0524107	-0.139081	-0.356132	-0.610267	-0.815384	-0.915568	-0.828859	-0.586556	-0.394244	-0.324523	-0.378932	-0.503308	-0.586369	-0.67244	-0.758658	-0.770087	-0.707188	-0.521388	-0.250783	0.0499933	0.332201	0.563397	0.679794	0.711917	0.644334	0.592891	0.508756	0.417411
1.13749	1.01838	0.912617	0.785164	0.717056	0.630446	0.546116	0.476158	0.464762	0.430917	0.380772	0.323286	0.254292	0.238581	0.304299	0.386407	0.369622	0.207121	-0.0637154	-0.334108	-0.545212	-0.644915	-0.622506	-0.508646	-0.387996	-0.263162	-0.1375	-0.00242189	0.105419	0.234234	0.31567	0.365002	0.340416	0.368622	0.459771	0.581192	0.659335	0.655205	0.579961	0.416766	0.218816	-0.00812351	-0.12459	-0.187357	-0.232507	-0.33156	-0.454579	-0.495763	-0.436833	-0.271819
0.0196811	0.134387	0.253882	0.353726	0.428917	0.414929	0.346038	0.277714	0.204558	0.17057	0.147419	0.129527	0.0952719	-0.0232671	-0.181053	-0.298264	-0.347102	-0.329996	-0.278431	-0.321554	-0.397439	-0.442544	-0.405618	-0.294332	-0.167895	-0.0894689	-0.0589851	-0.0180117	0.0502528	0.137996	0.210703	0.171317	0.0442783	-0.133645	-0.326632	-0.493146	-0.633989	-0.691588	-0.604154	-0.41654	-0.246301	-0.1614	-0.243562	-0.389499	-0.505262	-0.544838	-0.569236	-0.585238	-0.592075	-0.554754
0.680294	0.671364	0.654347	0.581835	0.459258	0.278412	0.0768167	-0.0995746	-0.216422	-0.242137	-0.156948	-0.0134336	0.0683614	0.0888435	0.0304379	-0.00899431	0.0189908	0.107787	0.178073	0.167461	0.10447	-0.0485578	-0.203485	-0.349763	-0.38943	-0.303492	-0.125481	0.0891273	0.322537	0.51218	0.610105	0.621384	0.550215	0.443651	0.247578	0.0586987	-0.128558	-0.279403	-0.360978	-0.325675	-0.130859	0.171275	0.43689	0.497042	0.364057	0.0212742	-0.321245	-0.520827	-0.564329	-0.44075
0.503859	0.337286	0.124593	-0.107717	-0.266194	-0.278228	-0.198977	-0.0788043	-0.0541188	-0.141631	-0.352198	-0.635493	-0.92056	-1.11122	-1.18799	-1.10902	-0.854477	-0.566708	-0.282771	-0.0784128	0.0873277	0.230464	0.347863	0.338735	0.268047	0.226515	0.309938	0.493902	0.708836	0.876964	0.931943	0.8951	0.699748	0.355027	-0.0191266	-0.284913	-0.345211	-0.134823	0.22583	0.548195	0.64296	0.500663	0.273613	0.132688	0.06877	0.0723578	0.0990051	0.148864	0.24497	0.373171
0.699619	0.815813	0.973398	1.1006	1.13795	1.06585	0.85505	0.603651	0.369077	0.156798	-0.0258031	-0.161608	-0.239432	-0.225378	-0.121801	0.00145288	0.176345	0.343381	0.455659	0.49301	0.403215	0.238235	0.0768567	-0.0068584	0.00650241	0.150077	0.309795	0.453558	0.471475	0.383334	0.281041	0.191704	0.175145	0.243911	0.404296	0.670843	0.944776	1.1657	1.2179	1.06265	0.746095	0.357666	0.038363	-0.0758082	-0.00915052	0.15823	0.333257	0.341898	0.15001	-0.135493
-0.0182924	0.0372854	0.118124	0.196876	0.287558	0.418002	0.525894	0.56938	0.485054	0.342523	0.1332	-0.0259375	-0.0862594	-0.0163506	0.116507	0.208315	0.228932	0.116044	-0.0581495	-0.27258	-0.445319	-0.578462	-0.706403	-0.798902	-0.86577	-0.861299	-0.778534	-0.599475	-0.386127	-0.258934	-0.246325	-0.284606	-0.341179	-0.39648	-0.340049	-0.198686	0.00701867	0.160903	0.190409	0.0944884	-0.0465762	-0.204321	-0.363021	-0.489177	-0.62663	-0.730081	-0.794123	-0.774814	-0.688881	-0.575865
0.669246	0.825893	0.927891	0.974447	1.04523	1.11416	1.16088	1.04152	0.763933	0.413186	0.124819	-0.00754902	0.100998	0.390008	0.749695	1.07856	1.25532	1.22389	1.07753	1.01967	1.19789	1.55189	1.96493	2.2097	2.17843	1.96364	1.62527	1.35034	1.14671	1.04337	0.993574	0.93471	0.852219	0.751636	0.648001	0.554133	0.523857	0.515071	0.509827	0.54049	0.633709	0.748325	0.794586	0.68771	0.419384	0.0543413	-0.272151	-0.390414	-0.291602	-0.0289156
0.127442	0.122743	0.0982283	0.0554158	0.0451673	0.0800067	0.160669	0.239926	0.259524	0.221072	0.211264	0.190042	0.133865	0.0223196	-0.125494	-0.218758	-0.214059	-0.122731	-0.0258468	0.0550702	0.102401	0.102377	0.090013	0.120014	0.153817	0.237599	0.388893	0.481806	0.493459	0.368503	0.169984	-0.00612167	-0.117028	-0.188116	-0.197813	-0.156524	-0.0791849	-0.0111486	-0.00983876	-0.0658022	-0.173957	-0.33147	-0.495917	-0.663362	-0.772646	-0.851179	-0.878053	-0.894674	-0.871824	-0.794401
-0.0508255	0.131108	0.245161	0.331542	0.366951	0.383208	0.432537	0.487005	0.570443	0.669345	0.796749	0.896432	0.979696	0.944757	0.784454	0.527124	0.262908	0.0684651	-0.0685325	-0.138804	-0.169282	-0.0411518	0.173246	0.393516	0.492075	0.475007	0.413381	0.384488	0.42896	0.557186	0.711578	0.912802	1.11484	1.35298	1.47877	1.49625	1.39786	1.20156	0.898509	0.518679	0.172163	-0.0397051	-0.0598869	0.0540171	0.201636	0.224385	0.156279	0.0672853	0.0406298	0.0353842
0.165288	0.259477	0.391157	0.518732	0.705846	0.895408	1.13354	1.25933	1.27681	1.17842	0.982121	0.679078	0.299255	-0.0472552	-0.259119	-0.2793	-0.165399	-0.0177822	0.00496633	-0.0631386	-0.152131	-0.178786	-0.184031	-0.13529	-0.0837281	0.0292836	0.198956	0.388203	0.55845	0.643532	0.658071	0.596512	0.551681	0.487041	0.489443	0.510401	0.563867	0.540044	0.440972	0.24491	-0.0466159	-0.368865	-0.663575	-0.857029	-0.937092	-1.0122	-1.04352	-1.04809	-1.00203	-0.796241
-0.116714	-0.0780974	-0.000314635	0.0526481	0.105375	0.0682153	0.0334796	-0.0479701	-0.0301244	0.0538843	0.130475	0.219116	0.269779	0.254835	0.256986	0.321746	0.444899	0.606037	0.731546	0.856423	0.951689	0.97432	0.957058	0.96363	0.963615	0.953805	0.936232	0.952884	1.08765	1.28839	1.50975	1.67681	1.76037	1.68817	1.49394	1.26202	1.00901	0.841232	0.819972	0.964167	1.10076	1.18966	1.2547	1.28592	1.24764	1.21545	1.21388	1.18923	1.17296	1.16056
0.864828	0.864274	0.793355	0.691178	0.527598	0.411619	0.337296	0.33381	0.351852	0.347707	0.368538	0.41986	0.49899	0.530317	0.416275	0.24269	0.0396043	-0.0891135	-0.141807	-0.0852686	0.0301714	0.158403	0.135972	0.0844039	0.119973	0.284662	0.575075	0.838812	1.02653	1.0623	0.962936	0.74458	0.482348	0.204266	-0.0974204	-0.320445	-0.371234	-0.223403	0.0717076	0.417148	0.683281	0.894644	1.02206	1.14808	1.20251	1.15856	0.997595	0.817966	0.641472	0.598358
-0.11495	0.0164779	0.136634	0.204706	0.221629	0.247914	0.300561	0.381733	0.413869	0.296883	0.118817	-0.0895104	-0.221551	-0.275604	-0.217606	-0.0991867	0.0323544	0.00934422	-0.0435544	-0.00706681	0.161872	0.459781	0.730326	0.922893	0.959579	0.857654	0.633662	0.364661	0.0794017	-0.230072	-0.458853	-0.510953	-0.359306	-0.0565785	0.297778	0.570781	0.787599	0.918302	1.04757	1.10341	1.05833	0.893207	0.708942	0.527892	0.483666	0.566213	0.69893	0.763685	0.725707	0.616395
-0.0099939	-0.0642967	-0.167636	-0.350499	-0.506432	-0.534713	-0.403917	-0.142811	0.162824	0.398292	0.585299	0.698032	0.809528	0.857692	0.818806	0.676387	0.517457	0.361299	0.323154	0.394352	0.508821	0.564673	0.531917	0.437634	0.340071	0.329252	0.434138	0.596549	0.774517	0.939078	1.05503	1.16635	1.20866	1.20478	1.14607	1.0522	0.894649	0.710445	0.552783	0.504872	0.567877	0.657273	0.734697	0.814455	0.865845	0.871198	0.828551	0.67079	0.474133	0.312717
-0.0887757	-0.0606056	0.0339259	0.205284	0.390845	0.58303	0.753474	0.87357	0.988873	1.03269	1.02868	0.96787	0.870639	0.707457	0.516668	0.35337	0.303745	0.369004	0.461595	0.541787	0.624396	0.677623	0.683168	0.638996	0.475595	0.271908	0.104721	0.0558249	0.19575	0.481714	0.747895	0.928715	0.887952	0.730796	0.525551	0.40298	0.395561	0.49671	0.639247	0.70583	0.71324	0.623167	0.484304	0.342098	0.158544	-0.00540787	-0.107249	-0.145431	-0.206424	-0.281128
0.647747	0.771522	0.861731	0.962212	1.00405	1.00007	0.939622	0.842973	0.680767	0.491119	0.328797	0.27947	0.344338	0.436375	0.516088	0.598202	0.651111	0.656623	0.612715	0.450292	0.247823	0.0816358	0.0330323	0.17212	0.456374	0.720963	0.900702	0.860182	0.703966	0.499948	0.378111	0.370736	0.47128	0.612965	0.679149	0.686515	0.596981	0.458948	0.317593	0.135137	-0.0278342	-0.129067	-0.167019	-0.227648	-0.301905	-0.433387	-0.564209	-0.689241	-0.767236	-0.770091
0.70514	0.638051	0.537449	0.451711	0.34794	0.216965	0.0824787	-0.0798391	-0.248646	-0.426716	-0.595779	-0.810549	-1.05163	-1.29288	-1.47009	-1.52545	-1.4224	-1.16992	-0.865563	-0.728014	-0.725162	-0.823129	-0.882889	-0.879542	-0.776014	-0.604967	-0.417645	-0.223153	-0.0823927	-0.00609624	-0.0541823	-0.18531	-0.398927	-0.550994	-0.7152	-0.837118	-0.862886	-0.785852	-0.557855	-0.15439	0.331495	0.727397	0.913879	0.81939	0.567327	0.192344	-0.117764	-0.334359	-0.43713	-0.440973
-0.301127	-0.258981	-0.349482	-0.467014	-0.612374	-0.685737	-0.68259	-0.585277	-0.424496	-0.248418	-0.0655994	0.0667121	0.138429	0.0932293	-0.0300274	-0.230823	-0.373762	-0.528112	-0.642712	-0.666934	-0.594524	-0.380212	-0.000963885	0.455757	0.827897	1.00318	0.914367	0.677434	0.324959	0.0334636	-0.170131	-0.266733	-0.270346	-0.208166	-0.186836	-0.196336	-0.183313	-0.118713	0.0369737	0.166566	0.249061	0.299849	0.296749	0.2739	0.263491	0.255	0.180627	-0.0221407	-0.213613	-0.258662
-0.843737	-0.768888	-0.689843	-0.561296	-0.396993	-0.228236	-0.0488043	0.0810564	0.151445	0.107082	-0.0138912	-0.210967	-0.351259	-0.50275	-0.615227	-0.639	-0.567931	-0.357589	0.014634	0.462895	0.828142	1.00018	0.913011	0.680466	0.33452	0.0484239	-0.151399	-0.246212	-0.249758	-0.18873	-0.167795	-0.177119	-0.164337	-0.100934	0.0518689	0.179061	0.260028	0.309875	0.306832	0.284406	0.27419	0.265857	0.192862	-0.00615052	-0.194076	-0.238291	-0.117509	0.092845	0.402345	0.638455
0.099344	0.167778	0.217532	0.233484	0.172628	0.0438676	-0.152559	-0.292389	-0.443381	-0.555488	-0.579183	-0.508348	-0.298698	0.0722989	0.519084	0.883127	1.0546	0.967716	0.735938	0.391131	0.105977	-0.0931875	-0.187688	-0.191222	-0.130396	-0.10953	-0.118823	-0.106083	-0.0428887	0.109411	0.236184	0.316885	0.366568	0.363535	0.341183	0.331	0.322695	0.249939	0.0515828	-0.135724	-0.179793	-0.0594088	0.150252	0.458732	0.694065	0.782606	0.75756	0.642756	0.523997	0.476473
1.1282	0.954739	0.812432	0.666415	0.545915	0.505746	0.529895	0.5967	0.681183	0.672638	0.664984	0.654866	0.703846	0.789536	0.926944	1.02833	1.10315	1.11952	1.104	1.03396	0.912365	0.852381	0.827928	0.822644	0.782871	0.743308	0.689106	0.631282	0.647167	0.766189	0.932093	1.1581	1.34201	1.43606	1.45368	1.35758	1.22953	1.14595	1.13048	1.13309	1.10232	0.947964	0.720982	0.524884	0.422592	0.445241	0.516511	0.659868	0.812558	0.919489
0.177319	0.211421	0.209429	0.180707	0.214055	0.331265	0.49084	0.708226	0.885123	0.97558	0.992531	0.900093	0.776928	0.696539	0.681663	0.684165	0.65457	0.506105	0.287782	0.0991648	0.000774327	0.0225598	0.0911107	0.228999	0.375865	0.478716	0.545824	0.545042	0.520444	0.504912	0.501578	0.569878	0.590579	0.555683	0.406588	0.191169	0.00177188	-0.12903	-0.171137	-0.138002	-0.137576	-0.192744	-0.279149	-0.342964	-0.331009	-0.260302	-0.204532	-0.243695	-0.363875	-0.441407
0.0870022	-0.0242368	-0.11038	-0.185751	-0.280581	-0.502712	-0.751485	-0.89367	-0.930977	-0.862446	-0.804554	-0.776664	-0.745223	-0.648062	-0.506696	-0.360049	-0.212793	-0.0979739	0.00361157	0.0176698	-0.0471828	-0.286789	-0.566076	-0.786576	-0.840226	-0.705478	-0.497395	-0.274536	-0.136744	-0.0367485	0.0688	0.127627	0.0583989	-0.0364654	-0.0862166	0.0125533	0.219039	0.4315	0.595163	0.69612	0.727341	0.717263	0.679251	0.5641	0.4235	0.27597	0.231577	0.246338	0.182013	0.0512698
0.031197	-0.378138	-0.688139	-0.840935	-0.879767	-0.812419	-0.755778	-0.728491	-0.697729	-0.602667	-0.464355	-0.320875	-0.176801	-0.0644612	0.0349299	0.0486844	-0.0147673	-0.249198	-0.522451	-0.738188	-0.790679	-0.658842	-0.455254	-0.23721	-0.102394	-0.0045584	0.0987101	0.156267	0.0885337	-0.00428138	-0.052958	0.0436785	0.245703	0.453575	0.613704	0.712479	0.743026	0.733166	0.695975	0.583311	0.445749	0.301405	0.257971	0.272413	0.209478	0.0815586	-0.117241	-0.226828	-0.174792	0.0114399
-0.41683	-0.478728	-0.542226	-0.595277	-0.604661	-0.526125	-0.392239	-0.253352	-0.113889	-0.00514491	0.091065	0.104379	0.0429585	-0.183969	-0.448476	-0.657308	-0.708119	-0.580502	-0.38343	-0.172364	-0.0418636	0.0528406	0.152804	0.208518	0.142953	0.0531087	0.00599015	0.0995335	0.295092	0.496311	0.651314	0.746928	0.776497	0.766953	0.730952	0.621894	0.488735	0.349011	0.306967	0.320947	0.260026	0.136201	-0.0562353	-0.162315	-0.111944	0.0683269	0.273432	0.440089	0.476928	0.478326
0.179924	0.323866	0.489518	0.643132	0.755953	0.828572	0.855279	0.846659	0.814142	0.715638	0.595366	0.469164	0.431189	0.443816	0.388791	0.276949	0.103136	0.00732268	0.0528186	0.215644	0.400899	0.551428	0.584702	0.585964	0.568322	0.540642	0.524874	0.461237	0.377083	0.342048	0.32289	0.387364	0.51842	0.678616	0.761485	0.735115	0.656283	0.567678	0.539653	0.536163	0.57121	0.648496	0.691596	0.650807	0.564182	0.400259	0.227306	0.145067	0.147827	0.284121
0.828813	0.656574	0.498896	0.363073	0.323411	0.335085	0.279162	0.165494	-0.011156	-0.108534	-0.0622951	0.103188	0.291468	0.444454	0.478271	0.479554	0.461623	0.433492	0.417466	0.352791	0.267262	0.231656	0.212185	0.277711	0.410907	0.573718	0.65794	0.63114	0.551021	0.460969	0.432487	0.428939	0.464559	0.543107	0.58691	0.545455	0.457416	0.290817	0.115041	0.0314589	0.0342643	0.172783	0.338883	0.497796	0.602387	0.595004	0.434246	0.187215	-0.0719091	-0.306255
-0.72912	-0.560715	-0.389641	-0.164589	0.036762	0.213498	0.322303	0.314622	0.147388	-0.109596	-0.379159	-0.622946	-0.692025	-0.535329	-0.262601	-0.0207623	0.0675906	0.0394839	-0.0358651	-0.0633132	-0.072771	-0.00317078	0.115007	0.239814	0.38864	0.462469	0.436369	0.377024	0.371313	0.428028	0.529439	0.569981	0.47181	0.230282	-0.0859895	-0.391442	-0.666621	-0.88581	-1.02514	-1.03862	-0.969264	-0.846495	-0.669898	-0.469586	-0.254123	-0.0995562	0.0183136	0.108982	0.153846	0.177486
-0.724315	-0.566854	-0.401286	-0.215704	-0.0790856	0.0295741	0.117639	0.161215	0.184176	0.185516	0.22461	0.272192	0.282079	0.217194	0.132441	0.0363918	-0.0403389	-0.0869286	-0.119933	-0.128674	-0.130487	-0.148619	-0.154165	-0.183306	-0.191555	-0.128153	0.00781278	0.119014	0.0862512	-0.126658	-0.430175	-0.707533	-0.913229	-0.973652	-0.925395	-0.844377	-0.828256	-0.896222	-1.02847	-1.10329	-1.0354	-0.805834	-0.461268	-0.122121	0.107123	0.161978	0.0521781	-0.101293	-0.252038	-0.283122
0.285081	0.426799	0.499363	0.460674	0.302693	0.128659	-0.0362644	-0.070272	-0.000257252	0.123011	0.191178	0.198793	0.195793	0.1873	0.174559	0.205463	0.312594	0.494979	0.754435	0.996381	1.18677	1.28724	1.25555	1.06796	0.747089	0.397921	0.095559	-0.112176	-0.249748	-0.285315	-0.25511	-0.240855	-0.2436	-0.322859	-0.469689	-0.688619	-0.892313	-0.97301	-0.892015	-0.688522	-0.395601	-0.213779	-0.217214	-0.28709	-0.302137	-0.180089	0.0435196	0.231963	0.327377	0.300095
-0.503337	-0.232997	0.0158008	0.258596	0.415563	0.450502	0.394217	0.287522	0.0737355	-0.182842	-0.388716	-0.463069	-0.411512	-0.354609	-0.325411	-0.434992	-0.644904	-0.879386	-0.980004	-0.897686	-0.670729	-0.366137	-0.104038	0.0830626	0.126714	0.0826015	-0.0328723	-0.169752	-0.23119	-0.130323	0.089543	0.356569	0.635899	0.868153	1.00063	1.01813	0.964571	0.86125	0.679848	0.444197	0.207839	0.0478147	-0.00641129	0.0587068	0.219293	0.457665	0.632288	0.629837	0.468925	0.205086
-0.312418	-0.0467836	0.223636	0.486589	0.741404	0.954933	1.07962	1.09609	1.04568	0.948437	0.777704	0.555912	0.333455	0.182841	0.131804	0.193093	0.344235	0.568588	0.732941	0.730633	0.579185	0.330863	0.0328743	-0.239501	-0.402111	-0.414332	-0.259146	-0.0202035	0.240109	0.39262	0.442382	0.397589	0.410276	0.538365	0.760001	0.980871	1.13463	1.16127	1.07534	0.879214	0.65875	0.474683	0.31483	0.194333	0.115742	0.117154	0.240281	0.378217	0.526034	0.561031
0.787318	0.991292	1.16374	1.25473	1.25917	1.20231	1.09685	0.911701	0.671178	0.429933	0.2666	0.211253	0.277718	0.441624	0.684924	0.863157	0.860655	0.696416	0.427123	0.103968	-0.191411	-0.367753	-0.381006	-0.212715	0.0464078	0.328705	0.494095	0.548061	0.499485	0.513243	0.652149	0.892503	1.13203	1.29877	1.32766	1.23447	1.02178	0.782701	0.583089	0.409736	0.279063	0.193834	0.195366	0.328891	0.478476	0.638777	0.67673	0.569193	0.400263	0.2573
-0.567521	-0.373124	-0.147906	0.0839258	0.213471	0.255962	0.209111	0.222381	0.356353	0.58817	0.819187	0.980011	1.00787	0.917994	0.71286	0.482269	0.289746	0.12255	-0.00348215	-0.0856839	-0.0842066	0.0445758	0.188849	0.343456	0.380061	0.276344	0.113413	-0.0244721	-0.0274314	0.0908615	0.228819	0.357065	0.472387	0.559345	0.639684	0.690821	0.682072	0.636445	0.545421	0.484739	0.487432	0.487821	0.439716	0.353426	0.269845	0.22034	0.203213	0.234847	0.348885	0.492453
-0.0785188	-0.234638	-0.317038	-0.266865	-0.12056	0.0307991	0.164811	0.285318	0.376186	0.460138	0.513574	0.504431	0.456753	0.361636	0.298225	0.301039	0.301447	0.251179	0.161008	0.0736694	0.0219389	0.00404174	0.0370976	0.156263	0.306287	0.393917	0.377661	0.313648	0.247044	0.166814	0.106231	0.101985	0.162092	0.283629	0.466916	0.616715	0.677245	0.661032	0.556499	0.414766	0.289142	0.195027	0.154456	0.116943	0.0438568	-0.0716553	-0.183747	-0.203834	-0.105901	0.0159143
-0.187401	-0.148243	-0.123226	-0.105075	-0.0548518	0.0656894	0.219529	0.309388	0.292719	0.227078	0.158779	0.0765086	0.0143844	0.0100302	0.0716666	0.196295	0.384244	0.537853	0.599924	0.583298	0.476106	0.330768	0.201948	0.105439	0.0638363	0.0253686	-0.0495763	-0.168027	-0.282969	-0.303568	-0.203143	-0.0782295	-0.0321104	-0.0924848	-0.243581	-0.391842	-0.437951	-0.404807	-0.331475	-0.276967	-0.2953	-0.296658	-0.35447	-0.418991	-0.513984	-0.478466	-0.38622	-0.230294	-0.0978737	-0.0505005
-0.507282	-0.513041	-0.541934	-0.575615	-0.614501	-0.657006	-0.671956	-0.632287	-0.602511	-0.60388	-0.581227	-0.519904	-0.404284	-0.272111	-0.224142	-0.264003	-0.372222	-0.477431	-0.400647	-0.18035	0.0406144	0.223038	0.281721	0.21387	0.0941356	-0.000181657	-0.0258456	-0.0544734	-0.0594535	-0.0468601	-0.0160812	0.0294085	0.157323	0.248625	0.29469	0.194787	0.0299732	-0.162713	-0.243482	-0.189693	-0.0652786	-0.0207706	-0.0697809	-0.193672	-0.243178	-0.19596	-0.044795	0.145	0.325428	0.405923
0.0677443	0.0880069	0.0486417	-0.0922456	-0.268714	-0.445389	-0.567971	-0.631602	-0.587054	-0.415699	-0.191824	0.036955	0.200498	0.313389	0.266098	0.102422	-0.127762	-0.364416	-0.576479	-0.720628	-0.72774	-0.627271	-0.43865	-0.277012	-0.188211	-0.167285	-0.167468	-0.128789	-0.0375617	0.113229	0.213848	0.294627	0.368223	0.417934	0.35641	0.165703	-0.00742877	-0.108762	-0.111275	-0.0876073	-0.0792134	-0.088864	-0.111106	-0.0982486	-0.0532401	0.0391584	0.130476	0.236755	0.3525	0.51123
-0.42973	-0.357276	-0.283196	-0.192457	-0.125037	-0.108532	-0.117928	-0.139581	-0.127064	-0.0832463	0.00670719	0.0956089	0.199075	0.311757	0.466288	0.578555	0.566387	0.444631	0.281609	0.163652	0.122215	0.140874	0.142908	0.106054	0.0223893	0.018448	0.130926	0.339361	0.595141	0.824966	0.949172	0.959713	0.920549	0.87107	0.861786	0.871743	0.883113	0.830256	0.652179	0.387394	0.0431245	-0.300078	-0.544886	-0.634177	-0.54388	-0.37062	-0.19542	-0.0724532	-0.0209892	-0.0702492
0.0971728	-0.00143151	-0.0715959	-0.0769443	-0.0407924	0.0448966	0.135095	0.240071	0.354397	0.511182	0.625087	0.612741	0.489209	0.323808	0.204131	0.16209	0.181021	0.183084	0.145693	0.0608075	0.0568086	0.170928	0.382403	0.641914	0.875092	1.00111	1.01181	0.97207	0.921869	0.912449	0.922552	0.934088	0.88046	0.699785	0.431137	0.0818452	-0.266364	-0.514744	-0.605337	-0.513722	-0.337935	-0.16018	-0.0354186	0.0167961	-0.0331824	-0.175308	-0.331597	-0.48903	-0.562322	-0.566619
0.686754	0.524687	0.301716	0.115096	-0.0106446	-0.0966887	-0.139116	-0.150526	-0.172359	-0.204768	-0.283323	-0.352177	-0.335307	-0.258404	-0.213242	-0.187842	-0.209977	-0.25137	-0.27079	-0.204498	-0.129423	-0.062542	-0.0214731	-0.0212551	-0.0300208	-0.0750209	-0.130201	-0.155254	-0.140003	-0.120701	-0.0270332	0.0945255	0.225514	0.381932	0.530941	0.587233	0.584657	0.533358	0.505028	0.500914	0.467915	0.466677	0.489745	0.512767	0.492247	0.356011	0.156916	0.0587614	0.0924667	0.234291
-0.172035	-0.101991	-0.0220379	0.0900821	0.202618	0.242574	0.178082	-0.0326233	-0.288526	-0.536804	-0.692523	-0.692692	-0.566047	-0.344636	-0.0810419	0.157715	0.251393	0.254733	0.246592	0.360145	0.626398	0.87746	0.992893	0.920571	0.684496	0.461101	0.289055	0.217074	0.222046	0.239583	0.239498	0.250189	0.294125	0.368217	0.455143	0.586131	0.755577	0.878565	0.979827	1.04817	1.05042	0.998789	0.954384	0.977695	1.01607	1.00606	0.921208	0.797802	0.686252	0.634854
0.92295	0.734606	0.498643	0.323127	0.185064	0.133784	0.138665	0.155882	0.155799	0.166294	0.20943	0.282172	0.367514	0.496116	0.662475	0.783222	0.882639	0.94974	0.951943	0.901255	0.85766	0.880546	0.918219	0.908393	0.825088	0.703931	0.594413	0.543951	0.544805	0.532084	0.466095	0.378909	0.36114	0.399391	0.493781	0.549781	0.599815	0.662868	0.732973	0.808731	0.893137	0.995212	1.16474	1.35109	1.45506	1.42542	1.2434	0.922785	0.61856	0.384828
-0.173271	-0.160394	-0.0858267	0.0953491	0.277063	0.466026	0.61167	0.681862	0.618756	0.545074	0.49111	0.513992	0.601727	0.654798	0.673008	0.598307	0.469801	0.36554	0.368327	0.494353	0.633442	0.765558	0.80633	0.744384	0.583831	0.46663	0.453756	0.55369	0.722896	0.838429	0.902001	0.898739	0.944944	0.981149	0.974572	0.95897	0.939212	0.962947	1.06008	1.1408	1.18859	1.25886	1.28083	1.25547	1.18928	1.10749	0.986817	0.819881	0.662045	0.665503
-0.057692	-0.0248323	0.0748816	0.253718	0.404523	0.538669	0.578896	0.517777	0.359371	0.243736	0.231034	0.329632	0.496577	0.610566	0.673288	0.67007	0.715658	0.751379	0.74489	0.729496	0.710002	0.73342	0.829254	0.908892	0.956044	1.02537	1.04705	1.02203	0.956727	0.876036	0.756971	0.592266	0.436539	0.439951	0.599988	0.862694	1.12278	1.30666	1.29716	1.16257	0.987034	0.796385	0.650789	0.568913	0.5606	0.529329	0.463681	0.349622	0.272293	0.278243
0.376474	0.420109	0.361551	0.234068	0.105422	0.108646	0.261372	0.512078	0.760281	0.935765	0.9267	0.798254	0.630738	0.448798	0.309853	0.231717	0.223783	0.193941	0.131293	0.0224431	-0.051353	-0.0456751	0.0278483	0.141106	0.19817	0.153176	0.0227366	-0.043406	-0.0804728	-0.07159	-0.0143055	0.0964569	0.255431	0.42673	0.634389	0.848027	0.997426	1.07011	1.03232	0.975755	0.892153	0.86424	0.830413	0.75085	0.631107	0.569427	0.494937	0.411004	0.287692	0.0930178
-0.186822	-0.287009	-0.313994	-0.278119	-0.210663	-0.125824	-0.0583357	-0.0153023	0.000795747	-0.0294713	-0.0505611	-0.0343913	0.0312863	0.0776597	0.0500106	-0.0648954	-0.241356	-0.369969	-0.413281	-0.338193	-0.21726	-0.11168	-0.00611444	0.0862341	0.177956	0.217859	0.177796	0.144175	0.160483	0.208882	0.237287	0.232952	0.242782	0.273175	0.338369	0.376714	0.368758	0.371121	0.378615	0.373704	0.36563	0.378977	0.387017	0.346158	0.230172	0.0617196	-0.13998	-0.273442	-0.29307	-0.196368
-0.436754	-0.398824	-0.374595	-0.339287	-0.278792	-0.193571	-0.117699	-0.0481621	-0.00900455	0.0403503	0.135572	0.235735	0.325975	0.361123	0.413359	0.445478	0.487686	0.539613	0.54475	0.51181	0.50623	0.51052	0.525381	0.605234	0.727763	0.884649	1.00912	1.10102	1.10565	0.997176	0.772087	0.597146	0.504344	0.544403	0.635617	0.71451	0.708855	0.61	0.512519	0.449447	0.443379	0.461521	0.446747	0.365361	0.280561	0.221418	0.167252	0.091679	-0.0528776	-0.323953
0.675716	0.591424	0.545992	0.521214	0.533782	0.576609	0.646895	0.732325	0.769694	0.775328	0.71108	0.59903	0.468383	0.347894	0.331579	0.351794	0.337714	0.297816	0.142618	-0.0356656	-0.126453	-0.137571	-0.0429447	0.0444862	0.117058	0.196862	0.277186	0.393947	0.589905	0.754359	0.845186	0.80808	0.69558	0.616273	0.582239	0.594306	0.586016	0.47425	0.301959	0.12009	-0.0420069	-0.139466	-0.186311	-0.212686	-0.179882	-0.105339	0.0219681	0.173736	0.257276	0.246248
-0.637558	-0.498498	-0.359599	-0.271858	-0.221551	-0.0853027	0.105218	0.360379	0.597351	0.758189	0.728117	0.506038	0.165377	-0.197501	-0.486869	-0.619021	-0.55767	-0.419925	-0.23057	-0.108139	-0.0625677	-0.0289189	-0.019218	-0.0166711	-0.0667922	-0.178654	-0.285769	-0.235802	-0.0216474	0.262242	0.434522	0.464458	0.42685	0.390541	0.466628	0.619964	0.767183	0.841813	0.842106	0.790865	0.706471	0.632081	0.606982	0.595432	0.564616	0.553194	0.500022	0.432667	0.316987	0.207171
-1.03689	-0.923008	-0.806126	-0.733088	-0.625649	-0.485528	-0.310367	-0.116263	0.0894298	0.270143	0.339575	0.242256	-0.00758554	-0.296974	-0.548645	-0.64485	-0.625518	-0.570981	-0.517391	-0.402546	-0.268529	-0.0893402	0.0524438	0.134447	0.146667	0.116331	0.00190564	-0.140589	-0.260913	-0.351072	-0.344462	-0.356215	-0.344748	-0.382795	-0.412115	-0.350598	-0.226112	-0.109351	-0.107403	-0.247086	-0.420319	-0.485947	-0.429855	-0.278539	-0.116702	-0.0217429	-0.0639064	-0.208359	-0.352352	-0.359804
0.0749578	0.157173	0.149756	-0.0143458	-0.213369	-0.350574	-0.364823	-0.301531	-0.30543	-0.455146	-0.678866	-0.868139	-0.941299	-0.834253	-0.621224	-0.412816	-0.280808	-0.246719	-0.269699	-0.31996	-0.36125	-0.38115	-0.381548	-0.365478	-0.326075	-0.35673	-0.497947	-0.696988	-0.805861	-0.76532	-0.607976	-0.351476	-0.118462	0.0687069	0.0849242	-0.0407508	-0.258454	-0.542247	-0.792615	-1.04251	-1.19708	-1.18618	-1.07615	-0.966635	-0.863102	-0.82616	-0.815218	-0.87562	-1.00943	-1.12069
0.355158	0.527242	0.641959	0.666297	0.566187	0.319189	-0.0269024	-0.416619	-0.709044	-0.833954	-0.817168	-0.674271	-0.502514	-0.285435	-0.131335	-0.0361953	-0.0193198	-0.000861218	0.0772145	0.213399	0.346896	0.389475	0.409486	0.44459	0.555805	0.752901	0.980187	1.13213	1.13007	1.03653	0.86082	0.694454	0.533134	0.421964	0.340858	0.224812	0.10879	0.0077606	-0.0365477	-0.0556124	-0.0681167	-0.117027	-0.202808	-0.359052	-0.481688	-0.618666	-0.713742	-0.746282	-0.670758	-0.543501
-0.445414	-0.305424	-0.190586	-0.0946816	-0.0685546	-0.0481845	-0.0562287	-0.0662277	-0.100764	-0.172733	-0.283454	-0.390499	-0.452342	-0.500627	-0.531644	-0.583455	-0.702511	-0.856394	-0.979158	-1.05801	-1.10119	-1.11567	-1.10308	-0.964121	-0.740671	-0.427186	-0.121167	0.0891805	0.124159	0.0145405	-0.167679	-0.351064	-0.442152	-0.468559	-0.3757	-0.242705	-0.14835	-0.107818	-0.1104	-0.0590414	0.0170866	0.172594	0.336547	0.441579	0.341989	0.0521716	-0.32102	-0.691131	-0.970755	-1.14703
0.524066	0.430299	0.348165	0.269176	0.156847	0.00590087	-0.155391	-0.265464	-0.254925	-0.166535	-0.0492977	0.00230366	-0.0295147	-0.170586	-0.333274	-0.365249	-0.262696	-0.000434916	0.279181	0.536149	0.749429	0.801758	0.683098	0.477643	0.270738	0.0881391	0.00500639	-0.0240937	-0.0233181	-0.0515229	-0.129911	-0.210474	-0.274164	-0.254126	-0.12847	0.0898999	0.281242	0.406321	0.4703	0.46693	0.434836	0.381649	0.382	0.358006	0.366114	0.346974	0.352875	0.330134	0.312797	0.278369
-0.831985	-0.834825	-0.807581	-0.760051	-0.685486	-0.537914	-0.348051	-0.132227	0.0675721	0.221813	0.332813	0.462367	0.590823	0.677406	0.653272	0.520016	0.315068	0.0624416	-0.149364	-0.287758	-0.336774	-0.341954	-0.346513	-0.380978	-0.422268	-0.457611	-0.391681	-0.254769	-0.104408	0.0261149	0.113572	0.143765	0.134358	0.101044	0.0625938	0.0760827	0.100029	0.0835243	0.040175	-0.0792729	-0.227556	-0.387399	-0.514391	-0.539181	-0.498312	-0.43652	-0.377815	-0.304845	-0.280528	-0.242561
-0.916459	-0.620773	-0.343369	-0.0862047	0.0717545	0.207801	0.22629	0.155995	-0.0391601	-0.247388	-0.41234	-0.489374	-0.544082	-0.593688	-0.726788	-0.855283	-0.901817	-0.845676	-0.663261	-0.45824	-0.28106	-0.115595	0.00769475	0.0748485	0.118002	0.157575	0.205701	0.276793	0.310626	0.21142	-0.00432227	-0.259204	-0.468243	-0.564038	-0.487916	-0.254661	0.0197085	0.297656	0.421288	0.417231	0.2849	0.177816	0.0901366	0.0900871	0.0639691	-0.00641273	-0.0658075	-0.143045	-0.101959	-0.0474043
0.670133	0.401714	0.112983	-0.149499	-0.351382	-0.440357	-0.366995	-0.142193	0.122232	0.390106	0.509258	0.505348	0.377813	0.27461	0.190108	0.19006	0.164889	0.097058	0.0398158	-0.034622	0.0049741	0.0575521	0.16747	0.283575	0.384722	0.483902	0.593152	0.664878	0.716644	0.635975	0.475036	0.212673	-0.0554791	-0.239727	-0.308413	-0.291666	-0.189867	-0.0319851	0.0578319	0.0689464	-0.0127987	-0.15283	-0.224381	-0.261483	-0.280133	-0.284344	-0.312662	-0.330592	-0.229764	-0.0264455
0.183488	0.0919405	0.0358759	-0.0166458	-0.0343561	-0.0184956	0.00806484	-0.0161109	-0.125032	-0.290073	-0.435378	-0.510446	-0.515996	-0.426116	-0.323334	-0.207676	-0.114582	0.023796	0.182328	0.260448	0.218904	0.118114	-0.06118	-0.255593	-0.407724	-0.518815	-0.577108	-0.616651	-0.588317	-0.582455	-0.706186	-0.883266	-1.16683	-1.43198	-1.60268	-1.60637	-1.44996	-1.25293	-1.08457	-0.991355	-0.995439	-1.01435	-1.03874	-0.97865	-0.83554	-0.616111	-0.403291	-0.246495	-0.163071	-0.0886493
-0.255626	-0.132399	0.0472718	0.229622	0.318438	0.279752	0.17374	-0.0148432	-0.219328	-0.379342	-0.496189	-0.557502	-0.599094	-0.569292	-0.563126	-0.693267	-0.879522	-1.17777	-1.45667	-1.63621	-1.64009	-1.47557	-1.26834	-1.09126	-0.993211	-0.997506	-1.0174	-1.04305	-0.979848	-0.829324	-0.598525	-0.374679	-0.209759	-0.122014	-0.0437357	0.0986679	0.297127	0.56797	0.702366	0.70257	0.590879	0.464134	0.331794	0.142325	-0.144493	-0.454735	-0.732327	-0.899987	-0.876592	-0.749719
1.03945	0.827122	0.548647	0.284424	0.0445321	-0.122044	-0.227754	-0.204461	-0.0294211	0.157947	0.314334	0.390207	0.399129	0.354408	0.280748	0.198151	0.128307	0.0274456	-0.120754	-0.258651	-0.379928	-0.386777	-0.273174	-0.104951	0.00360512	-0.0546578	-0.270327	-0.493415	-0.616226	-0.600807	-0.480144	-0.369966	-0.27821	-0.259569	-0.245614	-0.252601	-0.25615	-0.275872	-0.258808	-0.137462	-0.0289945	-0.00112513	-0.0927186	-0.196237	-0.302606	-0.310909	-0.23917	-0.145076	-0.0626979	-0.0539371
0.0665594	0.0649418	0.0610572	0.025008	0.00196723	0.00818737	-0.016013	-0.0639672	-0.176979	-0.320505	-0.435063	-0.4605	-0.375727	-0.187709	0.0134299	0.174746	0.268793	0.312622	0.335257	0.2983	0.254423	0.201742	0.131004	0.0371038	-0.071736	-0.210738	-0.323653	-0.358374	-0.304253	-0.173046	-0.0483395	0.0817814	0.150822	0.201398	0.202954	0.141635	0.048491	-0.0830844	-0.179466	-0.196405	-0.115189	0.0137551	0.101267	0.137154	0.145538	0.142438	0.180104	0.23519	0.252833	0.193354
-0.542231	-0.322584	-0.0205268	0.388405	0.778359	1.08729	1.26165	1.30675	1.21398	1.00623	0.700594	0.379476	0.208593	0.236885	0.305163	0.281708	0.122277	-0.185463	-0.526042	-0.778572	-1.01181	-1.1819	-1.30494	-1.31672	-1.23623	-1.10563	-1.03291	-1.04491	-1.12831	-1.15918	-1.07166	-0.843801	-0.574299	-0.374684	-0.282326	-0.352371	-0.521402	-0.694381	-0.810632	-0.786267	-0.690947	-0.520179	-0.375219	-0.263	-0.230207	-0.228474	-0.211813	-0.122412	0.0158953	0.161079
0.523952	0.426964	0.358414	0.297217	0.272017	0.29408	0.336647	0.412132	0.521669	0.695911	0.836197	0.831896	0.698201	0.489451	0.328252	0.321267	0.343862	0.341333	0.336671	0.317903	0.292972	0.239287	0.0743798	-0.174413	-0.46765	-0.724105	-0.847289	-0.807505	-0.659841	-0.414076	-0.124231	0.144947	0.372718	0.57467	0.780121	0.986974	1.19698	1.31742	1.30587	1.17065	0.937569	0.637991	0.389858	0.209141	0.128582	0.1531	0.303556	0.494363	0.678511	0.768274
0.1358	0.175127	0.235796	0.2956	0.374175	0.484882	0.658901	0.799007	0.794711	0.661188	0.452706	0.291713	0.284737	0.307304	0.304777	0.300121	0.281377	0.256479	0.202862	0.0381666	-0.210307	-0.503168	-0.759295	-0.882321	-0.842587	-0.695113	-0.449664	-0.16019	0.108644	0.336122	0.537815	0.743003	0.949591	1.15933	1.27962	1.26808	1.13304	0.90025	0.601055	0.35324	0.172755	0.0922992	0.116786	0.267049	0.457611	0.641523	0.731171	0.711375	0.565305	0.369202
-0.994359	-1.06104	-1.10452	-1.12718	-1.10838	-0.986881	-0.745534	-0.475636	-0.275488	-0.192388	-0.225475	-0.311531	-0.365667	-0.276542	-0.032379	0.339303	0.738355	0.98996	1.02029	0.92052	0.799603	0.646572	0.519463	0.470887	0.535306	0.696329	0.921939	1.09251	1.03709	0.681167	0.196328	-0.216846	-0.438255	-0.404155	-0.323714	-0.31333	-0.428812	-0.616998	-0.818611	-0.906329	-0.849525	-0.679564	-0.534991	-0.482522	-0.47574	-0.43894	-0.300666	-0.136315	-0.0170366	0.0389147
-0.44042	-0.257357	-0.112958	-0.0556197	-0.103678	-0.20533	-0.234661	-0.143713	0.0155327	0.173296	0.223936	0.123127	-0.0617696	-0.24692	-0.383295	-0.476065	-0.525807	-0.495255	-0.492654	-0.502432	-0.465675	-0.328543	-0.143779	0.042512	0.164296	0.21483	0.201948	0.196159	0.171433	0.128246	0.0913012	0.0439306	0.0022464	-0.05088	-0.131111	-0.276556	-0.39501	-0.46694	-0.442988	-0.400828	-0.351115	-0.319346	-0.266783	-0.182642	-0.0949326	-0.0673348	-0.0651887	-0.0127051	0.135827	0.314649
-0.0637742	-0.274013	-0.432036	-0.539401	-0.575763	-0.551612	-0.496281	-0.49361	-0.477917	-0.462343	-0.472454	-0.455035	-0.421843	-0.375359	-0.307723	-0.25889	-0.170978	-0.0917953	-0.0738111	-0.0832227	-0.0719858	-0.052138	0.0289619	0.139664	0.204229	0.139962	-0.0243283	-0.198149	-0.253406	-0.170344	-0.0734228	-0.0180961	-0.0122743	-0.0362786	-0.0155845	0.108485	0.277406	0.39637	0.373299	0.247681	0.104101	0.0768656	0.18502	0.41907	0.662273	0.836999	0.880405	0.778661	0.658968	0.541313
-0.535849	-0.607317	-0.725939	-0.815247	-0.826578	-0.700371	-0.417439	-0.0823317	0.214977	0.241728	0.0230625	-0.233955	-0.461973	-0.571242	-0.616184	-0.608991	-0.54718	-0.473973	-0.390174	-0.328545	-0.342659	-0.47945	-0.642665	-0.795677	-0.896015	-0.87388	-0.767721	-0.60827	-0.483119	-0.429541	-0.330892	-0.167143	0.0144953	0.0590488	0.0253344	0.00679659	0.155965	0.292827	0.381002	0.251554	-0.020069	-0.328677	-0.518614	-0.535141	-0.387187	-0.158219	0.0144979	-0.0283813	-0.328086	-0.689015
-0.118864	-0.178268	-0.267901	-0.393181	-0.512071	-0.586617	-0.551615	-0.456346	-0.337453	-0.296307	-0.351835	-0.567806	-0.833343	-1.04573	-1.20652	-1.2394	-1.17888	-1.01625	-0.831361	-0.655335	-0.460265	-0.275211	-0.184187	-0.18701	-0.263573	-0.425495	-0.545558	-0.518505	-0.324974	-0.0891466	0.134852	0.275236	0.372125	0.399555	0.364632	0.326128	0.282624	0.242406	0.221687	0.268761	0.339808	0.417783	0.480445	0.485985	0.44785	0.321231	0.145808	-0.0853634	-0.307903	-0.423562
-0.776708	-0.789541	-0.735285	-0.64939	-0.554315	-0.506863	-0.548388	-0.687457	-0.903448	-1.1088	-1.21521	-1.19897	-1.13642	-1.0497	-1.00771	-0.911692	-0.721617	-0.408455	-0.0470711	0.220219	0.369286	0.341036	0.180331	-0.0846063	-0.343204	-0.515078	-0.486542	-0.320985	-0.089496	0.0363027	0.0258004	-0.0981829	-0.233321	-0.307945	-0.340406	-0.384417	-0.427231	-0.411113	-0.314768	-0.17414	-0.0957273	-0.136025	-0.211068	-0.15143	0.101857	0.46509	0.76869	0.785789	0.56439	0.201006
-0.643562	-0.700744	-0.792392	-0.930793	-1.06774	-1.16793	-1.11063	-0.854235	-0.412019	0.0778864	0.486027	0.695989	0.744728	0.652122	0.502989	0.461518	0.542417	0.764246	1.00647	1.12149	1.09566	0.987945	0.828375	0.685842	0.581526	0.489962	0.424937	0.36627	0.335738	0.338522	0.346344	0.364651	0.470621	0.576731	0.705588	0.768994	0.803289	0.827404	0.863387	0.89383	0.954943	0.994459	0.914563	0.799568	0.697008	0.623394	0.602257	0.665777	0.76597	0.881586
0.8947	0.874596	0.890981	0.894301	0.801902	0.678468	0.577447	0.504939	0.484119	0.546686	0.645374	0.759254	0.787524	0.725074	0.592044	0.427602	0.312564	0.315832	0.40183	0.533106	0.713209	0.877248	1.00717	1.01877	0.967644	0.845454	0.699964	0.563696	0.468795	0.369622	0.27571	0.227363	0.266408	0.365453	0.436676	0.49619	0.532334	0.620418	0.723554	0.761472	0.670577	0.486504	0.256784	0.124444	0.114083	0.231193	0.319851	0.32154	0.166813	-0.0868721
0.0966456	0.0625278	0.0245439	-0.0104784	-0.0829434	-0.164098	-0.212417	-0.173395	-0.0744062	-0.0032245	0.056255	0.0923791	0.180412	0.283489	0.321384	0.230542	0.0465751	-0.183013	-0.315277	-0.325632	-0.20859	-0.119983	-0.118294	-0.272932	-0.526471	-0.721886	-0.774917	-0.687705	-0.522014	-0.279885	-0.110265	-0.0627445	-0.134316	-0.273387	-0.419663	-0.48591	-0.486571	-0.419856	-0.319623	-0.138923	0.088372	0.293282	0.371795	0.360053	0.302349	0.235314	0.199809	0.259461	0.346342	0.388508
-0.443172	-0.237959	-0.177305	-0.21768	-0.428065	-0.743188	-0.979643	-1.04381	-0.938284	-0.737795	-0.444816	-0.239572	-0.182072	-0.268675	-0.436953	-0.613949	-0.694108	-0.694909	-0.614183	-0.492898	-0.274249	0.000780719	0.248725	0.343726	0.329519	0.259696	0.178583	0.135621	0.2078	0.312928	0.363949	0.39242	0.400516	0.393219	0.368361	0.2921	0.25331	0.222554	0.247375	0.298044	0.332638	0.344974	0.306932	0.252802	0.108403	0.00566671	-0.0193977	0.122185	0.306979	0.465615
-0.479523	-0.443708	-0.387303	-0.309783	-0.133625	0.0915131	0.307217	0.389866	0.377506	0.316762	0.246196	0.20882	0.271614	0.363072	0.407459	0.432229	0.439271	0.432923	0.411297	0.344953	0.311206	0.28445	0.306044	0.350124	0.38022	0.390951	0.357856	0.310764	0.185141	0.0957638	0.0739585	0.197131	0.357897	0.495906	0.567098	0.567365	0.550839	0.502993	0.43182	0.323008	0.176252	0.052767	-0.0323327	-0.0690694	-0.0506813	0.0928466	0.303841	0.595654	0.820294	0.885788
-0.134417	-0.0935112	0.0594812	0.264638	0.547067	0.766588	0.832481	0.593814	0.110055	-0.366468	-0.660954	-0.649545	-0.478786	-0.290957	-0.287773	-0.442412	-0.646978	-0.769064	-0.775361	-0.614827	-0.328563	-0.0172497	0.277187	0.504877	0.588309	0.525835	0.360032	0.144977	0.0266236	0.00879135	0.103749	0.210151	0.293781	0.342322	0.384435	0.389989	0.284184	0.0997441	-0.111183	-0.239915	-0.288835	-0.361871	-0.5064	-0.688122	-0.820389	-0.790507	-0.535067	-0.20005	0.0764813	0.167638
-0.52104	-0.285288	-0.0675772	0.0781815	0.171328	0.220702	0.259982	0.265163	0.166475	-0.00555758	-0.202296	-0.322368	-0.367997	-0.43612	-0.570927	-0.740424	-0.863794	-0.835922	-0.597665	-0.285185	-0.0272555	0.0577692	-0.00631739	-0.126879	-0.271924	-0.393509	-0.518954	-0.721002	-0.954543	-1.14117	-1.22931	-1.12837	-0.89939	-0.669867	-0.504279	-0.483966	-0.536891	-0.599135	-0.538376	-0.412957	-0.273285	-0.216362	-0.242792	-0.315068	-0.363439	-0.329562	-0.269358	-0.197036	-0.190944	-0.226557
-0.833115	-0.442194	-0.114058	0.111176	0.172395	0.101148	-0.0166049	-0.158271	-0.277024	-0.399547	-0.596888	-0.824989	-1.00727	-1.09335	-0.994771	-0.771121	-0.546944	-0.385214	-0.365374	-0.417066	-0.47786	-0.418516	-0.296019	-0.1596	-0.104004	-0.129818	-0.20041	-0.247655	-0.214567	-0.155765	-0.0851282	-0.0791775	-0.113961	-0.180316	-0.216427	-0.210121	-0.225903	-0.219509	-0.169476	-0.0651528	0.104372	0.323972	0.510534	0.617595	0.58603	0.461656	0.248777	0.0972664	0.0734563	0.143113
-0.606072	-0.347931	-0.141384	0.012753	0.0727765	0.0477745	-0.0182706	-0.0624724	-0.0315157	0.0234988	0.0895854	0.0951527	0.0626098	0.000528684	-0.0332561	-0.0273559	-0.042122	-0.0361397	0.0106705	0.108274	0.266879	0.472333	0.646878	0.747043	0.717512	0.601149	0.401982	0.260231	0.237955	0.303125	0.376283	0.460435	0.558754	0.592895	0.584089	0.457613	0.308805	0.1251	0.011667	-0.0192729	0.0404803	0.132111	0.158491	0.124324	0.0357409	-0.0788713	-0.206194	-0.288579	-0.37994	-0.441616
0.52882	0.520118	0.501274	0.449246	0.363107	0.299867	0.321633	0.478087	0.727008	0.967086	1.08604	1.00927	0.839731	0.640309	0.483959	0.380167	0.319113	0.341398	0.443272	0.564534	0.644261	0.705184	0.765583	0.8724	0.969792	1.0479	1.02083	0.876684	0.780116	0.774866	0.919667	1.02592	1.03883	0.9256	0.790858	0.709012	0.764926	0.960204	1.20208	1.37904	1.42124	1.36082	1.23047	1.17197	1.15981	1.15091	1.05819	0.883083	0.646634	0.479111
0.0950676	0.241647	0.42108	0.676327	0.830717	0.856831	0.734968	0.589954	0.501868	0.562045	0.772211	1.03252	1.22298	1.26839	1.20337	1.06308	1.00012	0.987031	0.977453	0.877665	0.68921	0.434734	0.25444	0.262111	0.442863	0.73144	0.956274	0.988904	0.798827	0.516378	0.269684	0.169098	0.18162	0.326918	0.45848	0.61465	0.868993	1.13502	1.3399	1.42511	1.40455	1.32461	1.17036	0.978315	0.82409	0.65723	0.564054	0.543396	0.613764	0.776354
0.493194	0.568642	0.593486	0.569839	0.461609	0.313824	0.175693	0.0262466	-0.0572059	-0.0757087	-0.0126841	0.132939	0.285827	0.370704	0.360979	0.22773	-0.0195342	-0.32514	-0.602666	-0.803905	-0.850691	-0.756068	-0.551785	-0.339796	-0.196891	-0.135538	-0.168383	-0.253337	-0.344876	-0.427986	-0.499718	-0.509834	-0.469458	-0.335676	-0.141418	0.0826439	0.230737	0.264511	0.172356	0.0777992	0.0467801	0.0464684	0.0705334	0.090015	0.100956	0.0688505	0.00838787	-0.0870917	-0.283409	-0.458323
-0.542706	-0.593699	-0.587169	-0.536837	-0.394093	-0.188368	0.0518685	0.210652	0.246864	0.148056	0.0466741	0.0134158	0.0130817	0.0388839	0.0597718	0.0715031	0.0370794	-0.0277478	-0.13012	-0.340609	-0.528149	-0.583631	-0.485456	-0.276558	-0.0871457	-0.007866	-0.0155168	-0.10693	-0.211891	-0.296947	-0.423062	-0.555979	-0.624994	-0.658018	-0.514734	-0.239288	0.0339433	0.222815	0.362097	0.465472	0.513017	0.448117	0.295605	0.111868	-0.048648	-0.137043	-0.13632	-0.102948	-0.123415	-0.248713
[truncated: 3,019 more rows]
[truncated: 91 more columns]

## Sheet: A-SR
-1.11934	-0.880557	-0.61827	-0.404344	-0.312025	-0.312714	-0.395646	-0.456386	-0.436618	-0.374425	-0.327002	-0.300336	-0.286655	-0.261986	-0.234914	-0.215014	-0.191582	-0.20961	-0.261259	-0.317344	-0.422145	-0.576629	-0.75198	-0.881802	-0.98253	-1.00896	-0.942159	-0.787636	-0.568617	-0.337883	-0.103361	0.115541	0.337615	0.523319	0.695866	0.887528	1.0898	1.24023	1.24292	1.09634	0.832082	0.468553	0.156747	-0.137933	-0.408531	-0.621636	-0.717264	-0.70702	-0.657118	-0.66984
[truncated: 3,772 more rows]
[truncated: 91 more columns]

[truncated: 7 more sheets: B-Veh, B-SR, C-Veh, C-SR, D-Veh, D-SR, E-H]
