# Supplementary material for: Mechanism for differential recruitment of orbitostriatal transmission during actions and outcomes following chronic alcohol exposure
Source: eLife. 2021 Mar 17;10:e67065. doi: 10.7554/eLife.67065 (PMC8016477; doi:10.7554/eLife.67065)
Supplement: Figure 5—source data 1. [file elife-67065-fig5-data1.xlsx]

## Sheet: Figure 5B-Veh
0.0792948	0.0112567	-0.0171638	0.0111001	0.0728329	0.246091	0.477563	0.728158	0.940821	1.05735	1.04559	0.962546	0.863199	0.855065	0.916404	1.04218	1.15678	1.23888	1.31382	1.39029	1.42554	1.41124	1.37377	1.29692	1.22569	1.14957	1.10582	1.10293	1.17261	1.25569	1.34285	1.36338	1.36927	1.37292	1.37134	1.37764	1.30901	1.15137	0.915137	0.709014	0.615242	0.641987	0.741515	0.880616	0.996578	1.06314	1.0345	0.89831	0.770508	0.665068
-0.560957	-0.507965	-0.419613	-0.331071	-0.211237	-0.127269	-0.0577697	0.00919859	0.0255522	-0.0174493	-0.080092	-0.158823	-0.191698	-0.211091	-0.244714	-0.296546	-0.352121	-0.402834	-0.433341	-0.460899	-0.495858	-0.545493	-0.569898	-0.549956	-0.549495	-0.556235	-0.574052	-0.57252	-0.603118	-0.672566	-0.809494	-0.912681	-0.980265	-0.957938	-0.854032	-0.714178	-0.583818	-0.533049	-0.572601	-0.725176	-0.955508	-1.18039	-1.37254	-1.47359	-1.45074	-1.27635	-1.02339	-0.812286	-0.729258	-0.803104
0.0565709	0.157955	0.17452	0.0782081	-0.0606912	-0.203235	-0.262445	-0.279242	-0.241334	-0.206827	-0.141815	-0.0570851	-0.0725162	-0.0991575	-0.138983	-0.181018	-0.158339	-0.118446	-0.055143	0.0219283	0.0334706	-0.0285056	-0.0637719	-0.0271357	0.129933	0.339604	0.47671	0.497837	0.372763	0.172079	0.00350361	-0.0632271	-0.062359	-0.00627519	0.110227	0.260638	0.445251	0.57697	0.702189	0.757687	0.809188	0.782933	0.691545	0.596899	0.512786	0.466401	0.453635	0.51311	0.590508	0.669819
-0.893466	-0.640479	-0.431527	-0.301291	-0.314632	-0.454808	-0.63633	-0.720159	-0.700715	-0.630117	-0.620781	-0.681343	-0.727853	-0.688839	-0.558631	-0.421675	-0.331168	-0.386472	-0.53513	-0.657433	-0.687373	-0.518532	-0.290712	-0.0211127	0.214254	0.450579	0.650838	0.703629	0.587842	0.34876	0.168143	0.123385	0.268947	0.40095	0.483783	0.477331	0.41713	0.414803	0.527572	0.773037	0.995428	1.13934	1.16962	1.11816	1.01063	0.854853	0.670178	0.488366	0.379706	0.412199
0.386697	0.287174	0.201955	0.146741	0.173014	0.297937	0.476995	0.641197	0.743556	0.762816	0.73606	0.679837	0.59602	0.549629	0.513391	0.492565	0.441839	0.381276	0.342841	0.318439	0.292318	0.290743	0.362418	0.498779	0.652718	0.783384	0.848401	0.926607	0.974125	1.03572	1.10859	1.1831	1.26063	1.24897	1.23765	1.2311	1.17554	1.0365	0.813648	0.596101	0.462372	0.47346	0.624747	0.772928	0.800506	0.741441	0.680516	0.642571	0.667162	0.716338
0.72487	0.438635	0.137647	-0.152006	-0.414003	-0.587781	-0.683746	-0.61328	-0.491126	-0.34024	-0.28744	-0.353255	-0.555781	-0.814357	-1.05495	-1.19059	-1.13606	-0.906121	-0.600983	-0.406418	-0.428335	-0.599759	-0.789579	-0.879494	-0.939939	-0.999651	-1.0938	-1.13446	-1.10557	-1.04255	-1.00678	-0.997022	-1.04785	-1.08609	-1.05625	-0.926868	-0.784433	-0.686657	-0.680782	-0.720661	-0.763923	-0.744701	-0.649911	-0.541331	-0.47603	-0.458281	-0.458659	-0.431133	-0.348913	-0.255994
0.24143	-0.00550464	-0.172965	-0.229219	-0.163408	-0.0470543	0.0257306	0.0304189	0.0529893	0.139368	0.309069	0.537247	0.656644	0.666019	0.504007	0.34829	0.363443	0.466759	0.664638	0.851177	0.936752	0.880949	0.766316	0.596734	0.527638	0.56463	0.686299	0.828689	0.919592	0.954404	0.907452	0.837017	0.732347	0.614139	0.507317	0.457106	0.431686	0.432982	0.367294	0.342119	0.360219	0.475141	0.706214	0.886086	0.918243	0.806619	0.646887	0.42872	0.275825	0.152178
-1.18214	-1.25079	-1.22559	-1.18049	-1.09521	-1.03116	-1.01576	-1.0204	-1.0225	-1.02834	-0.982771	-0.899104	-0.839131	-0.772008	-0.790033	-0.876183	-0.976512	-1.08067	-1.10146	-1.00814	-0.876988	-0.769105	-0.722921	-0.779706	-0.846872	-0.87479	-0.849379	-0.805477	-0.734377	-0.650672	-0.600123	-0.617422	-0.660177	-0.689943	-0.660893	-0.599107	-0.585336	-0.612718	-0.653724	-0.650308	-0.515826	-0.388905	-0.257957	-0.165416	-0.118698	-0.15443	-0.181798	-0.227755	-0.293258	-0.372797
1.45714	1.4577	1.45548	1.40005	1.32532	1.30047	1.30607	1.37593	1.49592	1.59064	1.58624	1.52822	1.33922	1.0806	0.772587	0.552475	0.405668	0.326093	0.300983	0.374318	0.555957	0.798629	1.01564	1.13279	1.0182	0.729802	0.342922	0.0162675	-0.167998	-0.118626	0.0718115	0.269048	0.321683	0.228897	0.0317448	-0.214641	-0.409963	-0.439651	-0.356903	-0.160103	0.0425951	0.146372	0.10012	-0.0497339	-0.156583	-0.213915	-0.117646	0.0252639	0.205418	0.281648
-0.101478	0.136169	0.296844	0.376588	0.36516	0.329501	0.432476	0.581464	0.725475	0.732211	0.629824	0.485573	0.355198	0.23383	0.188771	0.249988	0.438135	0.688771	0.904176	1.07066	1.10418	1.02893	0.834565	0.598356	0.414586	0.291599	0.24695	0.303536	0.473457	0.705273	0.938457	1.10534	1.20355	1.2361	1.22789	1.18839	1.17554	1.16937	1.14455	1.1389	1.10893	1.04104	0.939915	0.906846	0.97996	1.092	1.18196	1.21411	1.20171	1.18688
-0.559319	-0.424475	-0.36326	-0.400775	-0.554046	-0.784091	-0.989029	-1.08925	-1.06883	-1.00872	-0.93676	-0.915327	-0.900946	-0.885541	-0.894748	-0.938438	-1.03083	-1.17206	-1.28168	-1.3083	-1.22801	-1.0946	-0.949585	-0.892997	-0.96088	-1.14973	-1.36876	-1.48152	-1.4689	-1.37601	-1.25825	-1.15759	-1.15828	-1.22489	-1.33333	-1.53988	-1.76352	-1.88337	-1.84837	-1.65569	-1.3787	-1.1644	-1.05707	-1.05209	-1.08557	-1.13912	-1.17492	-1.18614	-1.19621	-1.2067
-0.0835621	-0.189009	-0.207002	-0.16939	-0.112346	-0.0970566	-0.21074	-0.434736	-0.676101	-0.782259	-0.664958	-0.407941	-0.169231	-0.0837446	-0.164752	-0.280234	-0.28103	-0.153833	-0.00596919	0.102093	0.185495	0.264004	0.311948	0.378162	0.403284	0.355365	0.147576	-0.169012	-0.562383	-0.929084	-1.23707	-1.3547	-1.31831	-1.12822	-0.825732	-0.535283	-0.320354	-0.232762	-0.280524	-0.386079	-0.500732	-0.600321	-0.678733	-0.716803	-0.694252	-0.612678	-0.511612	-0.507223	-0.558853	-0.645839
0.216081	0.415142	0.617908	0.793573	0.885208	0.87514	0.831397	0.693131	0.565612	0.461528	0.355693	0.328835	0.447821	0.684329	0.931242	1.08236	1.04711	0.89482	0.664625	0.499227	0.387918	0.297194	0.173987	-0.0233442	-0.263919	-0.398425	-0.279603	0.0597719	0.442112	0.686858	0.733957	0.577005	0.363282	0.172125	0.0239471	-0.0817389	-0.113787	-0.0634706	0.0546599	0.166127	0.212426	0.222798	0.247542	0.320653	0.444629	0.571907	0.67849	0.741367	0.773638	0.798995
0.135304	0.191868	0.259313	0.297369	0.317184	0.279173	0.204223	0.12302	0.053498	0.0832232	0.212262	0.356369	0.454444	0.491381	0.418369	0.296633	0.0958841	-0.0899605	-0.205409	-0.193576	-0.035104	0.231629	0.521556	0.779738	0.992045	1.06593	0.992125	0.813413	0.640629	0.54759	0.558753	0.568091	0.565801	0.564994	0.530071	0.526383	0.528915	0.526055	0.584618	0.761158	0.969144	1.149	1.16577	0.965802	0.641012	0.355782	0.241821	0.327716	0.552165	0.777544
1.11139	0.992637	0.83428	0.700737	0.557367	0.430814	0.313169	0.251135	0.252	0.351226	0.52833	0.702307	0.845694	0.849756	0.741864	0.501752	0.211757	-0.0649286	-0.212283	-0.179006	0.0234363	0.282343	0.517039	0.643986	0.633245	0.455003	0.165109	-0.148012	-0.365899	-0.499876	-0.602195	-0.673482	-0.67197	-0.564151	-0.393375	-0.156402	0.05459	0.286285	0.399695	0.414876	0.325349	0.295885	0.427127	0.609647	0.759218	0.771317	0.654653	0.417388	0.23239	0.171816
0.0295853	0.0948394	0.283492	0.612498	1.01449	1.33709	1.51535	1.49054	1.29459	0.944179	0.606571	0.424795	0.474845	0.747494	1.1755	1.55156	1.76036	1.7827	1.6467	1.35351	0.988874	0.688652	0.52751	0.519579	0.517466	0.492777	0.350622	0.122308	-0.0333307	-0.0346079	0.115521	0.298977	0.453501	0.478336	0.368186	0.160288	-0.0387631	-0.187346	-0.260761	-0.266616	-0.241732	-0.186914	-0.12496	-0.0522766	-0.0186229	0.000428497	-0.00785061	-0.0427984	-0.135458	-0.307622
0.0751274	-0.02161	-0.130183	-0.143802	-0.176647	-0.2216	-0.287105	-0.300729	-0.252656	-0.258858	-0.316086	-0.434669	-0.44871	-0.324234	-0.0613786	0.235644	0.477305	0.627561	0.701627	0.771529	0.817437	0.792816	0.717777	0.660036	0.688082	0.794717	0.934576	0.984007	0.881118	0.595363	0.203966	-0.14634	-0.345116	-0.338204	-0.189026	0.00191589	0.16188	0.267056	0.34002	0.390936	0.451812	0.493486	0.486933	0.501061	0.518551	0.52663	0.543859	0.631114	0.796105	0.929792
-0.0263562	0.0580857	0.137299	0.224362	0.255992	0.244815	0.233209	0.258333	0.297102	0.372915	0.401672	0.42357	0.489137	0.555357	0.658824	0.753305	0.742257	0.676308	0.540998	0.393699	0.298905	0.324952	0.434362	0.604875	0.770439	0.820654	0.79795	0.705192	0.589482	0.503789	0.468896	0.411714	0.303704	0.139166	-0.0410487	-0.0870026	-0.0140234	0.134568	0.298047	0.42238	0.516975	0.532016	0.470272	0.352078	0.262039	0.263244	0.370116	0.498668	0.578352	0.517608
0.804487	0.730503	0.645828	0.524071	0.368172	0.220974	0.0935378	0.0752581	0.126239	0.245885	0.396044	0.60796	0.819098	1.05437	1.2455	1.33497	1.29145	1.11637	0.863462	0.536923	0.290491	0.119872	0.00769042	-0.0507547	-0.0465954	-0.0179072	-0.0239507	-0.0771521	-0.136672	-0.152371	-0.153476	-0.12588	-0.0745519	-0.118839	-0.282855	-0.541432	-0.777691	-0.934034	-0.974335	-0.925631	-0.840364	-0.766328	-0.685288	-0.545283	-0.406977	-0.315635	-0.306945	-0.352003	-0.413611	-0.448936
-0.421991	-0.347763	-0.112505	0.264901	0.702939	1.04733	1.2499	1.29509	1.22817	1.17416	1.13097	1.15114	1.21024	1.28231	1.35188	1.38444	1.25283	1.00586	0.772656	0.668167	0.74531	0.947744	1.20416	1.36761	1.49867	1.57203	1.64357	1.75482	1.8505	1.8814	1.82091	1.68623	1.5664	1.53186	1.5523	1.55775	1.56479	1.55209	1.52	1.51988	1.53032	1.63479	1.75689	1.80346	1.68683	1.53309	1.48806	1.54237	1.69216	1.8717
0.393406	0.326227	0.235766	0.19829	0.209917	0.317893	0.482557	0.612907	0.621221	0.503803	0.369765	0.328456	0.40707	0.538606	0.668176	0.778402	0.811311	0.785753	0.732834	0.712682	0.703552	0.729883	0.836264	1.00523	1.13145	1.14372	1.07604	1.04738	1.16193	1.39849	1.62034	1.71723	1.59332	1.32108	1.1134	1.03255	1.12171	1.32778	1.49078	1.5972	1.61844	1.52505	1.38499	1.21348	1.09186	1.01122	0.988479	1.01069	1.04538	1.10969
0.607782	0.664452	0.687961	0.648034	0.650987	0.689293	0.879884	1.09353	1.28327	1.38368	1.29867	1.1363	1.02586	0.981604	1.01815	1.06589	1.08918	1.10942	0.986047	0.747337	0.436076	0.0731543	-0.282542	-0.515613	-0.585402	-0.491591	-0.313944	-0.14591	-0.0477048	-0.0758027	-0.204498	-0.351689	-0.461659	-0.513758	-0.622329	-0.764646	-0.860439	-0.779146	-0.623064	-0.40179	-0.226006	-0.110533	-0.0316102	0.0918282	0.238706	0.367804	0.456364	0.489994	0.564396	0.684631
0.219773	0.0837086	-0.0662206	-0.234397	-0.371588	-0.459471	-0.504705	-0.515242	-0.514604	-0.476799	-0.466443	-0.440845	-0.47355	-0.511782	-0.566643	-0.553324	-0.468312	-0.293354	-0.0894809	0.0171354	-0.0082542	-0.180763	-0.387793	-0.552264	-0.616165	-0.667548	-0.689598	-0.638838	-0.478513	-0.208516	0.097583	0.333969	0.532965	0.628221	0.604549	0.489443	0.310267	0.189945	0.173654	0.258028	0.363517	0.366115	0.272479	0.17043	0.114585	0.123668	0.20888	0.321549	0.439693	0.534903
-0.293004	-0.134801	-0.010386	0.0779646	0.0578597	-0.0507975	-0.26898	-0.501817	-0.782739	-1.00751	-1.13907	-1.11614	-0.959508	-0.781912	-0.723375	-0.771601	-0.889853	-0.854706	-0.667896	-0.38486	-0.0982482	0.0533626	0.0704461	-0.042107	-0.199303	-0.329705	-0.399525	-0.427425	-0.392694	-0.397715	-0.465253	-0.519078	-0.490086	-0.380887	-0.203195	-0.0107608	0.0862857	0.0724005	-0.0493524	-0.242948	-0.461674	-0.648219	-0.732669	-0.744648	-0.725447	-0.731819	-0.711434	-0.693614	-0.615184	-0.54035
0.188325	0.146172	0.112141	0.10051	0.153959	0.228422	0.301453	0.376622	0.465415	0.57422	0.668274	0.765316	0.775738	0.730329	0.64148	0.614915	0.638398	0.619544	0.540664	0.317915	0.0163477	-0.281963	-0.482498	-0.583695	-0.613536	-0.553571	-0.393833	-0.126881	0.168758	0.368133	0.390438	0.186073	-0.200652	-0.636488	-0.881831	-0.85759	-0.553546	-0.142091	0.251109	0.46192	0.471745	0.321842	0.119337	0.0193374	-0.0590498	-0.0386166	-0.0299946	0.026299	0.108083	0.266859
0.619704	0.424876	0.220879	0.0651598	-0.0486868	-0.122934	-0.0899892	-0.0605976	-0.0400816	-0.0755831	-0.147472	-0.236285	-0.311016	-0.340354	-0.315651	-0.212753	-0.131797	-0.0121881	0.145817	0.258291	0.224621	0.116879	-0.0528721	-0.2343	-0.344079	-0.390656	-0.332042	-0.239367	-0.126959	-0.00209173	0.140655	0.26713	0.330342	0.319902	0.237404	0.155423	0.102178	0.150122	0.268142	0.449508	0.579565	0.661128	0.653907	0.58155	0.471313	0.357701	0.297062	0.32467	0.398264	0.409606
0.455083	0.0726361	-0.293687	-0.621549	-0.83459	-0.917794	-0.866291	-0.690429	-0.497648	-0.427997	-0.537733	-0.746928	-0.876638	-0.8326	-0.689041	-0.551384	-0.53048	-0.647671	-0.846528	-0.97143	-1.10369	-1.21524	-1.2949	-1.26661	-1.0977	-0.793999	-0.374417	0.0344412	0.281824	0.262535	0.0219058	-0.299114	-0.560218	-0.67112	-0.65436	-0.621688	-0.579193	-0.5729	-0.63174	-0.710763	-0.701419	-0.61558	-0.476527	-0.277521	-0.0754085	0.11059	0.210314	0.247326	0.22041	0.151846
0.187984	0.214494	0.323947	0.500961	0.629063	0.694778	0.659587	0.588383	0.474131	0.346246	0.212498	0.108245	0.0743878	0.145853	0.286227	0.416674	0.519168	0.573214	0.601756	0.60144	0.598975	0.597318	0.638114	0.731436	0.886523	1.00079	1.07434	1.03562	0.867645	0.628578	0.422307	0.379822	0.417141	0.444203	0.425868	0.336842	0.269198	0.282426	0.373287	0.455761	0.454048	0.372496	0.28579	0.24912	0.266502	0.30729	0.337339	0.419712	0.502002	0.602479
0.854248	0.677592	0.519957	0.404539	0.383398	0.42079	0.460356	0.492286	0.430398	0.310799	0.198416	0.159847	0.139492	0.129637	0.0633758	0.0195806	0.0804469	0.202379	0.380189	0.550471	0.685953	0.800655	0.816541	0.759678	0.670009	0.603869	0.580468	0.620105	0.670225	0.769314	0.879564	1.02172	1.16187	1.29819	1.42336	1.46926	1.49157	1.46167	1.45025	1.45455	1.53332	1.65999	1.71841	1.63102	1.35132	1.0226	0.788165	0.763661	0.885327	1.05013
-0.423253	-0.445572	-0.440942	-0.363534	-0.269442	-0.205296	-0.196146	-0.182825	-0.155969	-0.140138	-0.0391162	0.0620826	0.182824	0.268553	0.379082	0.493316	0.491979	0.331263	0.0884089	-0.168123	-0.391674	-0.560461	-0.749795	-0.939265	-1.1141	-1.25289	-1.28835	-1.24248	-1.19631	-1.12193	-1.01468	-0.964644	-0.911851	-0.93324	-1.03201	-1.18003	-1.25622	-1.23029	-1.05822	-0.713806	-0.380733	-0.153309	-0.136164	-0.314738	-0.553439	-0.700365	-0.684811	-0.463853	-0.185636	-0.00758797
-1.37867	-1.05394	-0.696278	-0.373681	-0.139464	-0.039278	-0.0741586	-0.168701	-0.27594	-0.31566	-0.288931	-0.158818	0.00396589	0.150419	0.202587	0.166896	0.0375144	-0.176606	-0.463322	-0.757576	-1.01911	-1.18597	-1.19839	-1.09674	-0.916681	-0.677887	-0.447519	-0.254875	-0.0316961	0.118992	0.179973	0.164438	0.152558	0.195734	0.325279	0.511717	0.692708	0.74813	0.608531	0.362965	0.11454	-0.0626501	-0.136909	-0.127849	-0.0850087	-0.0339003	0.0318934	0.0815976	0.0631012	-0.0670137
-0.88709	-0.660803	-0.424002	-0.157527	-0.00832081	0.021574	-0.0363832	-0.200232	-0.356664	-0.418836	-0.499918	-0.605481	-0.748449	-0.976622	-1.14774	-1.23387	-1.14229	-0.892445	-0.567973	-0.315285	-0.229853	-0.325691	-0.507413	-0.594129	-0.580388	-0.430063	-0.188036	0.0746334	0.319526	0.566494	0.82895	1.01817	1.06863	0.914155	0.655345	0.449684	0.335132	0.286018	0.173031	0.050397	-0.0452259	0.0312122	0.232521	0.54636	0.894841	1.13162	1.11182	0.853159	0.522844	0.221363
-0.861954	-0.769733	-0.673931	-0.576201	-0.502098	-0.427855	-0.384827	-0.376792	-0.378526	-0.427538	-0.569996	-0.780216	-1.04087	-1.23077	-1.3577	-1.43643	-1.43684	-1.2788	-1.06579	-0.83709	-0.76424	-0.864784	-1.08595	-1.29169	-1.36301	-1.28171	-1.11855	-0.961913	-0.855252	-0.812308	-0.770399	-0.744262	-0.734134	-0.695582	-0.569897	-0.368902	-0.20856	-0.145738	-0.243945	-0.466337	-0.750294	-1.04444	-1.24849	-1.3345	-1.33477	-1.30594	-1.2933	-1.31603	-1.32236	-1.34801
0.393131	0.553332	0.670901	0.709529	0.69537	0.621916	0.538825	0.502358	0.512081	0.498344	0.447889	0.381723	0.320721	0.259791	0.117366	-0.0622066	-0.287632	-0.461402	-0.505504	-0.437157	-0.283854	-0.129767	-0.0177146	-0.0187967	-0.0354589	-0.0656435	-0.0595966	-0.00778729	0.0587256	0.163645	0.169443	0.132213	0.0546722	-0.0419104	-0.134236	-0.202742	-0.231358	-0.241839	-0.201219	-0.144633	-0.0492367	0.0022401	0.0213605	0.0138424	0.00341367	-0.0121329	-0.0347982	-0.108807	-0.197977	-0.335578
0.490282	0.575485	0.622346	0.699679	0.7497	0.797121	0.816936	0.772637	0.652552	0.478689	0.27499	0.116546	0.050496	0.0521976	0.109945	0.187196	0.270841	0.379798	0.550365	0.683001	0.795812	0.872804	0.875151	0.837068	0.780674	0.74507	0.711911	0.704856	0.799812	0.892145	0.871703	0.691666	0.414378	0.0630816	-0.271243	-0.499514	-0.666346	-0.746379	-0.710918	-0.575804	-0.401999	-0.23918	-0.0969666	-0.0253749	-0.0399324	-0.10563	-0.133202	-0.113953	-0.0572007	-0.0237268
-0.42764	-0.348882	-0.28381	-0.147105	0.0778282	0.335817	0.603111	0.76922	0.838188	0.774587	0.561651	0.278382	0.0165536	-0.0989146	-0.17391	-0.202031	-0.201289	-0.172122	-0.165904	-0.163166	-0.187341	-0.209876	-0.182784	-0.0478236	0.123529	0.274105	0.387769	0.414134	0.342223	0.240145	0.165774	0.247337	0.459027	0.662341	0.72092	0.591391	0.363641	0.192368	0.122325	0.0731615	0.0539101	0.0877352	0.194913	0.404204	0.628635	0.778216	0.799866	0.674636	0.42317	0.0742092
-0.210659	-0.355324	-0.457913	-0.4794	-0.394627	-0.21113	0.0446701	0.263339	0.341219	0.302528	0.16325	-0.0122897	-0.199692	-0.381541	-0.510864	-0.531262	-0.476242	-0.380508	-0.232018	-0.0504366	0.0580117	0.0838442	-0.000616245	-0.134577	-0.230288	-0.258974	-0.16462	0.00502723	0.14381	0.293289	0.436046	0.601496	0.776703	0.94457	1.1093	1.21021	1.1858	1.04852	0.860711	0.678665	0.579661	0.561898	0.621393	0.72291	0.787595	0.789141	0.715829	0.619291	0.492178	0.358871
-0.724604	-0.660982	-0.617767	-0.572617	-0.546829	-0.567444	-0.630786	-0.802987	-0.945114	-1.01418	-0.890626	-0.592638	-0.187923	0.184147	0.384343	0.408592	0.267988	0.0845286	-0.0632559	-0.0795739	-0.0407864	0.0736653	0.134182	0.151895	0.163551	0.286835	0.477869	0.627777	0.702934	0.702676	0.600119	0.435377	0.286863	0.221055	0.214789	0.13978	0.00459068	-0.191108	-0.388947	-0.499716	-0.469812	-0.331973	-0.201503	-0.140301	-0.153931	-0.231543	-0.281002	-0.18772	0.0024246	0.186841
-0.543661	-0.64193	-0.707145	-0.740113	-0.736849	-0.703617	-0.551307	-0.38547	-0.245024	-0.206797	-0.289217	-0.433387	-0.568674	-0.704356	-0.758946	-0.709573	-0.617179	-0.537706	-0.549702	-0.662288	-0.825965	-0.943299	-0.981209	-0.904753	-0.796555	-0.687414	-0.508735	-0.261348	-0.00597418	0.157502	0.182074	0.0822805	-0.0536815	-0.199118	-0.320452	-0.383435	-0.511928	-0.63228	-0.695991	-0.633274	-0.401847	-0.146909	0.0331929	0.0637177	-0.0097701	-0.131624	-0.225598	-0.252949	-0.197237	-0.1344
-0.430912	-0.460953	-0.433339	-0.35853	-0.181806	0.105675	0.369913	0.464518	0.353487	0.0397448	-0.347404	-0.689403	-0.890341	-0.961574	-0.938757	-0.874874	-0.739049	-0.55865	-0.320476	-0.112844	0.0370625	0.0956194	0.105543	0.173842	0.221733	0.22963	0.114128	-0.133203	-0.39544	-0.557456	-0.588846	-0.491212	-0.352661	-0.230738	-0.173792	-0.147906	-0.0872012	0.0938105	0.310731	0.49318	0.606818	0.612932	0.501794	0.230392	-0.0147998	-0.179314	-0.160556	-0.0286009	0.195082	0.42047
0.283006	0.235032	0.212828	0.198891	0.238194	0.343069	0.463856	0.554261	0.546109	0.457613	0.305462	0.236573	0.255615	0.303321	0.297043	0.200331	0.0752393	-0.0395829	-0.092269	-0.137537	-0.16001	-0.236803	-0.267084	-0.267456	-0.201411	-0.13541	-0.112945	-0.149564	-0.280036	-0.478854	-0.684798	-0.861446	-0.904634	-0.864366	-0.730708	-0.611431	-0.576536	-0.625047	-0.732376	-0.852212	-0.899877	-0.910705	-0.839837	-0.743755	-0.711313	-0.83139	-1.01818	-1.30531	-1.49913	-1.53461
-0.586422	-0.48915	-0.352336	-0.187097	0.0317089	0.240867	0.428114	0.590008	0.688752	0.720336	0.718294	0.687587	0.64357	0.585094	0.479922	0.360798	0.252926	0.193529	0.179623	0.206335	0.229504	0.232569	0.257399	0.298214	0.364994	0.422377	0.420631	0.392745	0.376106	0.350322	0.298228	0.233981	0.156657	0.146878	0.185633	0.232973	0.2794	0.326807	0.373946	0.378299	0.255256	0.0769898	-0.11096	-0.242833	-0.224831	-0.109323	-0.00533231	-0.0367072	-0.16585	-0.239768
0.286691	0.275085	0.241448	0.108392	-0.0223141	-0.124182	-0.184623	-0.24245	-0.271612	-0.229171	-0.159408	-0.108979	-0.14528	-0.198116	-0.275178	-0.253243	-0.185158	-0.120718	-0.132461	-0.232087	-0.389002	-0.593084	-0.762967	-0.835368	-0.724743	-0.524716	-0.281876	-0.112469	-0.0300926	-0.0523253	-0.173243	-0.375517	-0.583865	-0.814853	-0.964237	-1.0564	-1.08895	-1.01619	-0.848385	-0.633152	-0.446031	-0.23938	-0.0838704	0.106031	0.238178	0.344071	0.353995	0.22911	0.020212	-0.227356
-0.19931	-0.0963629	-0.0446144	-0.0202327	-0.0131198	0.0367104	0.0837332	0.164452	0.283237	0.49049	0.59468	0.582095	0.45304	0.258812	0.0799296	-0.0520688	-0.0541339	0.0391472	0.123466	0.114042	0.0196019	-0.0978354	-0.198603	-0.185391	-0.0530602	0.137569	0.322472	0.429813	0.519742	0.513177	0.477445	0.35902	0.182877	-0.117616	-0.440216	-0.648505	-0.692403	-0.523177	-0.19548	0.208889	0.528227	0.792449	0.95622	1.02155	0.968639	0.840572	0.807163	0.872151	0.972552	1.05958
-0.428025	-0.332953	-0.271945	-0.291808	-0.376635	-0.533721	-0.675429	-0.736869	-0.694222	-0.576415	-0.4583	-0.41798	-0.456062	-0.534805	-0.583153	-0.582163	-0.59046	-0.553614	-0.508586	-0.439511	-0.307952	-0.126967	0.0539227	0.202281	0.228166	0.151209	0.0299535	-0.0474918	-0.10404	-0.136397	-0.219519	-0.346675	-0.436056	-0.43267	-0.352686	-0.264698	-0.248145	-0.304117	-0.333302	-0.30077	-0.140402	0.0953193	0.290727	0.397829	0.375441	0.265048	0.128587	-0.044203	-0.215591	-0.349905
0.462665	0.55165	0.507805	0.36942	0.198847	0.111192	0.168876	0.226849	0.282352	0.216971	0.045131	-0.117112	-0.212244	-0.263028	-0.271676	-0.285107	-0.33963	-0.386387	-0.406876	-0.375559	-0.318986	-0.297357	-0.321121	-0.380778	-0.464801	-0.483182	-0.431048	-0.358193	-0.249326	-0.14357	-0.0411287	0.0891186	0.214059	0.25437	0.196231	0.039778	-0.0993166	-0.123592	0.0201402	0.363271	0.791645	1.19626	1.45869	1.55687	1.49742	1.3213	1.00659	0.63652	0.327527	0.11635
-0.646129	-0.719585	-0.759159	-0.752182	-0.558499	-0.236435	0.111182	0.345825	0.416327	0.32909	0.182056	0.0295124	-0.0571561	-0.0395545	0.104613	0.275083	0.316296	0.167715	-0.103828	-0.365113	-0.540945	-0.609156	-0.605145	-0.58341	-0.502772	-0.458558	-0.351095	-0.223137	-0.0970622	0.0467773	0.166883	0.257875	0.298552	0.274373	0.196785	0.129434	0.0786164	0.0889078	0.142859	0.103689	-0.0668641	-0.272066	-0.435123	-0.424753	-0.383152	-0.233715	-0.0619298	0.0202678	-0.0150343	-0.142549
-0.0842867	-0.0606409	-0.0910858	-0.170995	-0.300309	-0.44865	-0.505911	-0.441384	-0.335371	-0.20141	-0.140193	-0.152851	-0.174596	-0.259022	-0.405054	-0.571869	-0.694048	-0.722735	-0.579445	-0.292413	-0.0274852	0.130633	0.108951	-4.46198e-05	-0.142426	-0.246899	-0.305311	-0.271894	-0.238514	-0.259246	-0.232689	-0.193791	-0.112526	0.0110839	0.151851	0.332299	0.438523	0.439692	0.28563	0.0911572	-0.0895463	-0.230871	-0.316223	-0.378304	-0.387409	-0.395429	-0.397822	-0.445882	-0.479245	-0.49734
0.04416	-0.0859312	-0.199211	-0.314782	-0.374995	-0.331776	-0.250899	-0.123537	-0.03831	-0.0295492	-0.0922497	-0.185543	-0.234752	-0.193899	-0.0617318	0.144667	0.384013	0.566261	0.630135	0.540427	0.342713	0.0892358	-0.140232	-0.257392	-0.258871	-0.200119	-0.179555	-0.216321	-0.282261	-0.321675	-0.267993	-0.139796	-0.0283631	-0.0441216	-0.195403	-0.35391	-0.444414	-0.436941	-0.375974	-0.342747	-0.363909	-0.407263	-0.419691	-0.418785	-0.445616	-0.525725	-0.680602	-0.872261	-0.966147	-0.933557
-0.323751	-0.49938	-0.681504	-0.787206	-0.793433	-0.746322	-0.629942	-0.497726	-0.342181	-0.200915	-0.0199624	0.189375	0.490586	0.730503	0.938324	1.01337	1.00222	0.983602	0.910289	0.829326	0.747184	0.702889	0.641078	0.534445	0.42296	0.299416	0.18748	0.0530826	-0.0471696	-0.064394	0.065476	0.290335	0.48014	0.578486	0.640714	0.65253	0.59955	0.587455	0.700766	0.927387	1.0936	1.10409	1.03214	0.948866	0.999986	1.11359	1.14696	0.995223	0.719642	0.437326
-0.985309	-0.89225	-0.764143	-0.591952	-0.374039	-0.216517	-0.101557	-0.06536	-0.0700609	-0.138498	-0.193337	-0.225453	-0.253779	-0.255298	-0.214651	-0.15539	-0.0717204	-0.0157413	-0.0411614	-0.0750443	-0.0439749	0.107477	0.298091	0.423682	0.415537	0.306114	0.144347	0.0118913	-0.0616534	-0.0686491	0.0491667	0.252812	0.471166	0.65342	0.677686	0.591865	0.505615	0.536418	0.678424	0.791188	0.805426	0.646361	0.430558	0.270802	0.209961	0.156609	0.0828906	-0.0167807	-0.035891	0.076801
0.794979	0.737563	0.594594	0.372416	0.106195	-0.100445	-0.228925	-0.248316	-0.194778	-0.137418	-0.137754	-0.123307	-0.139316	-0.163137	-0.246239	-0.29462	-0.29634	-0.229925	-0.108331	-0.0503227	-0.0643021	-0.195601	-0.382592	-0.602793	-0.786601	-0.881699	-0.898546	-0.83853	-0.766843	-0.654582	-0.471064	-0.197396	0.102595	0.357863	0.565127	0.682967	0.754954	0.742154	0.723393	0.673339	0.569355	0.433417	0.29369	0.172693	0.127993	0.167706	0.25951	0.346985	0.32922	0.162071
-0.574567	-0.439376	-0.229951	-3.85708e-05	0.182116	0.288722	0.324059	0.412577	0.535996	0.648158	0.627828	0.469186	0.288491	0.220766	0.293404	0.420372	0.483006	0.531551	0.507906	0.542592	0.59157	0.657699	0.676786	0.700125	0.73956	0.816348	0.853875	0.814642	0.729165	0.611407	0.526648	0.459068	0.458238	0.499949	0.587757	0.701667	0.82105	0.887086	0.888973	0.808541	0.619405	0.404028	0.251507	0.240996	0.373109	0.551898	0.702768	0.801173	0.808862	0.710131
0.915676	0.82298	0.724109	0.596716	0.468258	0.31981	0.123931	-0.0473095	-0.234317	-0.359249	-0.383937	-0.267518	-0.0830739	0.132557	0.28187	0.352115	0.430855	0.52734	0.702888	0.883821	1.00307	0.972951	0.813587	0.566363	0.318657	0.0931013	-0.0890657	-0.143269	-0.0634644	0.133748	0.339753	0.538976	0.629045	0.594644	0.474131	0.355395	0.316409	0.376672	0.460391	0.543237	0.62547	0.713061	0.790779	0.852727	0.878451	0.814456	0.672816	0.484636	0.347806	0.328307
-0.375597	-0.356526	-0.382465	-0.506397	-0.714593	-0.935339	-1.04349	-0.968139	-0.794201	-0.576909	-0.338289	-0.19653	-0.169892	-0.154776	-0.139144	-0.0935253	-0.0108425	0.077793	0.195135	0.354404	0.563931	0.742975	0.882318	0.924296	0.860843	0.734355	0.532246	0.407868	0.364429	0.472619	0.678851	0.899809	1.01202	0.975829	0.845821	0.774777	0.877821	1.05327	1.2033	1.1871	1.0037	0.746529	0.472713	0.258348	0.127588	0.0576181	0.0483393	0.115082	0.190689	0.221083
0.596565	0.498798	0.398192	0.298437	0.184862	0.113342	0.0937571	0.0836893	-0.0364185	-0.256577	-0.503772	-0.66729	-0.707816	-0.566541	-0.339257	-0.139777	-0.0266421	0.0522992	0.119809	0.164326	0.202864	0.238165	0.261012	0.309704	0.44034	0.579512	0.702299	0.669844	0.554762	0.388938	0.240364	0.129101	0.0973338	0.0914291	0.0260372	-0.086152	-0.183085	-0.310244	-0.453327	-0.594592	-0.776412	-0.906675	-0.954212	-0.871583	-0.670994	-0.46906	-0.333295	-0.229317	-0.141343	-0.118724
0.332457	0.27835	0.223983	0.154902	0.166395	0.252391	0.365882	0.363714	0.168808	-0.186163	-0.536528	-0.756055	-0.802272	-0.642818	-0.403722	-0.154308	0.0730382	0.281914	0.451741	0.543821	0.599801	0.669643	0.715082	0.726656	0.735906	0.807375	0.908006	1.01791	1.08156	1.05662	0.945757	0.768026	0.59601	0.446706	0.393849	0.428312	0.510867	0.59458	0.653427	0.6623	0.604075	0.583872	0.578645	0.62505	0.629549	0.581773	0.499421	0.45886	0.510715	0.550403
0.309505	0.134278	-0.0719454	-0.237727	-0.374157	-0.498659	-0.555734	-0.54764	-0.4932	-0.444855	-0.388589	-0.351678	-0.290593	-0.294378	-0.368384	-0.504728	-0.62926	-0.697134	-0.689852	-0.578964	-0.413398	-0.175521	0.11723	0.457749	0.732406	0.877736	0.872052	0.806026	0.782613	0.771022	0.705367	0.519516	0.297141	0.115904	0.0383535	0.0975063	0.235929	0.378044	0.473984	0.504543	0.497579	0.46114	0.368202	0.266036	0.187758	0.179136	0.267661	0.424789	0.486647	0.441506
0.128454	0.187077	0.269556	0.328616	0.34074	0.294622	0.212139	0.119803	0.0408354	0.0216807	0.0703432	0.167122	0.218638	0.169075	0.0662867	-0.0487247	-0.080369	0.0145209	0.194628	0.401052	0.564177	0.629337	0.629437	0.587237	0.562933	0.578423	0.634731	0.660118	0.671342	0.605898	0.496193	0.41305	0.39175	0.451626	0.54416	0.643838	0.74123	0.817571	0.773764	0.639767	0.426583	0.268941	0.155162	0.17085	0.273895	0.396578	0.435121	0.374822	0.322342	0.310044
1.16739	1.03785	0.817929	0.536277	0.306174	0.168876	0.118907	0.121785	0.211011	0.308894	0.380342	0.375928	0.365967	0.321725	0.210506	0.0955698	0.0122849	-0.0332834	-0.0278811	-0.00280655	-0.0249091	-0.104993	-0.226562	-0.317045	-0.292397	-0.24602	-0.175954	-0.117102	-0.0590748	0.00844532	0.101606	0.219988	0.28926	0.365516	0.433439	0.541677	0.611168	0.622019	0.56656	0.530527	0.541995	0.587772	0.630163	0.621286	0.575441	0.472392	0.337884	0.179054	0.0123438	-0.151419
0.182231	0.219521	0.303201	0.400712	0.52686	0.66584	0.808035	0.898349	0.884858	0.89545	0.92004	0.917805	0.884285	0.754124	0.605841	0.485311	0.496643	0.622524	0.779839	0.886792	0.950166	0.941693	0.913805	0.84045	0.736654	0.549097	0.287485	0.0745084	-0.0694496	-0.175581	-0.303604	-0.413197	-0.491471	-0.453665	-0.362806	-0.197599	0.0166326	0.229088	0.334826	0.269466	0.104805	-0.0610949	-0.197271	-0.190888	-0.0765918	0.0451302	0.159057	0.242752	0.246405	0.266243
0.757027	0.659953	0.606444	0.573539	0.498396	0.342666	0.118572	-0.0850924	-0.172705	-0.115349	0.0583721	0.29932	0.520434	0.694794	0.83002	0.910674	0.858868	0.698118	0.519402	0.387285	0.378045	0.440836	0.524894	0.535889	0.525795	0.516783	0.508206	0.505164	0.545263	0.607066	0.64697	0.648256	0.645861	0.628332	0.559655	0.509624	0.458264	0.49312	0.588806	0.778113	0.97062	1.04733	0.918843	0.660242	0.383045	0.240195	0.258044	0.410642	0.588828	0.714059
-0.229283	-0.397529	-0.474399	-0.446553	-0.306467	-0.0495795	0.239361	0.50562	0.661268	0.717787	0.683981	0.536704	0.408969	0.344997	0.401867	0.560945	0.81475	1.03699	1.13451	1.07158	0.945317	0.802588	0.672973	0.577706	0.447845	0.291189	0.12123	0.00334404	-0.0230647	0.00950052	0.0918557	0.238674	0.352468	0.456397	0.516982	0.546128	0.575016	0.59937	0.600157	0.597911	0.600641	0.534657	0.398577	0.281236	0.189466	0.151355	0.13334	0.0843595	0.032671	0.00543798
0.278855	0.00739982	-0.199298	-0.289862	-0.201721	0.00509121	0.220242	0.435143	0.62118	0.757657	0.812909	0.807319	0.751765	0.666048	0.589143	0.459503	0.33561	0.179159	0.0373706	-0.0217758	-0.037113	-0.045775	-0.0898096	-0.184358	-0.310659	-0.485896	-0.576462	-0.495312	-0.300324	-0.0876253	0.0461518	0.0348447	-0.00994591	0.00512365	0.159316	0.342796	0.453416	0.431147	0.346334	0.192084	0.0822476	-0.0563352	-0.131068	-0.177381	-0.200684	-0.20011	-0.206323	-0.164748	-0.114878	0.00166548
-0.0342729	0.0682203	0.073289	-0.0147718	-0.173934	-0.313813	-0.367573	-0.369539	-0.341844	-0.323241	-0.360981	-0.461356	-0.579342	-0.753033	-0.889827	-0.935547	-0.880886	-0.742559	-0.560516	-0.372519	-0.271582	-0.243754	-0.335306	-0.44013	-0.581831	-0.759999	-0.885589	-0.934354	-0.845343	-0.666338	-0.54415	-0.460858	-0.386025	-0.385397	-0.451186	-0.542711	-0.663181	-0.787745	-0.870795	-0.875683	-0.785209	-0.658503	-0.522012	-0.323145	-0.0291173	0.258428	0.365978	0.141319	-0.357876	-0.960744
0.210151	-0.024345	-0.284849	-0.547341	-0.697898	-0.790656	-0.772889	-0.763285	-0.851048	-1.01491	-1.20061	-1.32481	-1.40343	-1.386	-1.37661	-1.35307	-1.40187	-1.44687	-1.40455	-1.32718	-1.17018	-1.00489	-0.786339	-0.504624	-0.220549	-0.0133903	0.0968393	0.131512	0.0871649	0.001815	-0.116628	-0.247422	-0.413971	-0.56352	-0.710775	-0.852938	-0.997324	-1.0501	-0.986412	-0.807745	-0.57543	-0.371432	-0.245044	-0.175813	-0.12457	-0.137562	-0.249141	-0.501644	-0.759061	-0.881829
-0.182502	-0.303989	-0.355702	-0.314289	-0.184417	0.00263335	0.202315	0.339077	0.437603	0.462234	0.446519	0.402861	0.360554	0.275713	0.20285	0.0995484	0.0302648	0.00741167	-0.0163539	-0.0452152	-0.112708	-0.0418453	0.15007	0.419827	0.6695	0.869138	0.965486	0.912164	0.737649	0.458697	0.207174	0.00587211	-0.133733	-0.284525	-0.462903	-0.609627	-0.627359	-0.458437	-0.221329	0.0243691	0.141321	0.166891	0.142401	0.146248	0.210251	0.339777	0.507648	0.665293	0.769717	0.795985
-1.10739	-1.02101	-0.908785	-0.697663	-0.432679	-0.181083	0.125471	0.388803	0.576726	0.693742	0.728843	0.707091	0.562219	0.297756	0.0662758	-0.0419199	0.0130092	0.191484	0.351792	0.485001	0.548857	0.604483	0.71893	0.880885	1.08069	1.29668	1.48136	1.64648	1.79168	1.77961	1.69858	1.61289	1.55551	1.45592	1.27022	0.9354	0.527707	0.156578	-0.0437229	-0.0668862	0.0730417	0.293419	0.50256	0.647043	0.713243	0.702959	0.669201	0.650035	0.610371	0.574513
-0.0605116	-0.0741627	-0.0884705	-0.0808064	-0.0127401	0.0714268	0.14681	0.171331	0.124392	0.0583721	-0.0222287	-0.0884125	-0.192322	-0.256307	-0.285659	-0.189752	0.00346091	0.187982	0.276515	0.260781	0.230265	0.248067	0.270641	0.234013	0.191373	0.0936253	-0.0334221	-0.166512	-0.247705	-0.308799	-0.32125	-0.333271	-0.288419	-0.229408	-0.12318	-0.033627	0.0609379	0.146971	0.183269	0.137919	-0.0411622	-0.322723	-0.668949	-0.905574	-0.945692	-0.73976	-0.394975	-0.0450023	0.285705	0.46602
-0.426003	-0.47694	-0.498862	-0.544008	-0.484982	-0.372077	-0.254	-0.190032	-0.155222	-0.160127	-0.124803	-0.111418	-0.137969	-0.216639	-0.304023	-0.350218	-0.302104	-0.181823	-0.0107639	0.240006	0.449109	0.606317	0.636497	0.565195	0.438099	0.30257	0.209749	0.143675	0.0582018	-0.0633535	-0.207201	-0.307752	-0.367297	-0.289372	-0.149947	0.0263898	0.184188	0.22104	0.244384	0.18677	0.164177	0.0865501	-0.00869238	-0.130911	-0.196162	-0.18428	-0.158009	-0.086439	-0.0616986	-0.0347037
-0.302272	-0.487284	-0.68019	-0.78895	-0.876221	-0.837341	-0.711457	-0.493562	-0.205934	0.0647372	0.214304	0.25669	0.237443	0.230679	0.335664	0.500205	0.658238	0.671187	0.561111	0.451046	0.386517	0.339401	0.346208	0.338241	0.358171	0.390019	0.443013	0.527784	0.558189	0.53333	0.392933	0.207073	0.0129561	-0.0549858	0.000916237	0.136722	0.299567	0.366072	0.276511	0.0954645	-0.150643	-0.316457	-0.402612	-0.392772	-0.330027	-0.273252	-0.212907	-0.100651	0.0839399	0.371707
0.0835886	-0.026644	-0.101834	-0.0894278	0.0362255	0.258574	0.517254	0.671676	0.68126	0.528337	0.299035	0.158858	0.114865	0.076508	0.0486945	0.0329708	0.0773347	0.074631	0.0283218	-0.0853284	-0.273557	-0.451814	-0.595469	-0.741285	-0.901567	-1.06102	-1.07637	-0.919686	-0.619935	-0.209503	0.220018	0.56553	0.804377	0.978308	1.11617	1.10394	0.926341	0.590386	0.202005	-0.139315	-0.283305	-0.306279	-0.231553	-0.102019	0.0504233	0.191902	0.221598	0.220528	0.170539	0.0853589
1.0255	0.765221	0.465346	0.123382	-0.180799	-0.376603	-0.521865	-0.53988	-0.470458	-0.294426	-0.0599401	0.229605	0.543593	0.779999	0.895336	0.892957	0.81544	0.737264	0.75707	0.825706	0.933025	0.948632	0.918429	0.862601	0.830259	0.850569	0.912864	0.944935	0.920298	0.897643	0.945518	1.08905	1.16922	1.139	0.925882	0.577044	0.193248	-0.152818	-0.440564	-0.738823	-0.914542	-1.00538	-0.91875	-0.767374	-0.604585	-0.490553	-0.433375	-0.411859	-0.37423	-0.339633
-1.1829	-0.982018	-0.739819	-0.553532	-0.405367	-0.366863	-0.321489	-0.221361	0.0483492	0.407976	0.781746	1.07753	1.23006	1.2828	1.26649	1.20427	1.08796	0.972325	0.90061	0.872731	0.877587	0.927872	1.02001	1.08152	1.06585	0.951235	0.766182	0.567979	0.401603	0.300207	0.233689	0.199199	0.147396	0.118726	0.0767587	0.0550126	0.0276518	-0.0493425	-0.146811	-0.234163	-0.269308	-0.216009	-0.11484	-0.0505435	0.0500127	0.0959169	0.200844	0.339926	0.478772	0.625607
-0.341376	-0.315019	-0.285139	-0.213878	-0.0916038	0.057431	0.165977	0.176855	0.138638	0.0771267	0.0227542	-0.030084	-0.059056	-0.0753452	-0.00177934	0.0941697	0.186754	0.192286	0.12191	-0.0065066	-0.0401824	-0.0082099	0.0835313	0.180866	0.274518	0.369093	0.488252	0.615842	0.688748	0.682385	0.584705	0.435163	0.314926	0.250528	0.283442	0.359022	0.40149	0.375418	0.266725	0.105533	-0.0933588	-0.269184	-0.385827	-0.422523	-0.398847	-0.350601	-0.326835	-0.362621	-0.524363	-0.794666
0.424691	0.254239	0.0681635	-0.0448448	-0.0713323	-0.0515619	-0.0230452	-0.0181018	-0.077392	-0.195539	-0.315919	-0.392093	-0.398215	-0.355824	-0.290051	-0.20253	-0.110628	-0.0336336	0.0631129	0.171446	0.32169	0.452938	0.587391	0.661903	0.618979	0.517787	0.413361	0.341697	0.29506	0.249134	0.178028	0.141351	0.0679307	-0.0114825	-0.151775	-0.262657	-0.270043	-0.169147	0.0121893	0.232731	0.335318	0.293306	0.156035	-0.0279442	-0.17409	-0.214197	-0.238455	-0.225816	-0.204777	-0.225431
-0.687741	-0.613987	-0.471846	-0.263021	-0.0401225	0.124806	0.157691	0.11252	0.0339045	-0.0448241	-0.0784312	-0.0510375	0.0326845	0.121151	0.179223	0.141995	0.0123843	-0.157375	-0.28448	-0.280689	-0.196092	-0.165549	-0.223166	-0.330626	-0.418232	-0.469991	-0.443625	-0.397941	-0.284294	-0.22695	-0.154388	-0.0524051	0.0869004	0.220445	0.327321	0.386704	0.405048	0.390778	0.358629	0.407958	0.466804	0.489526	0.441966	0.433607	0.480635	0.631282	0.789913	0.835469	0.740708	0.48311
0.0654609	0.135851	0.207065	0.234614	0.223664	0.132749	0.0426077	-0.102617	-0.218894	-0.274629	-0.256912	-0.196386	-0.21535	-0.276029	-0.350479	-0.336541	-0.199265	0.0427312	0.21471	0.280082	0.193377	0.0354291	-0.136065	-0.336061	-0.482581	-0.572966	-0.591116	-0.545292	-0.431938	-0.368443	-0.30189	-0.273086	-0.252517	-0.221301	-0.225814	-0.20046	-0.11594	0.00467329	0.166285	0.362952	0.429768	0.424715	0.305661	0.195462	0.0779131	0.0219111	0.0336155	0.0577107	0.0367931	0.0364833
-0.65046	-0.594244	-0.562938	-0.513419	-0.407644	-0.286771	-0.162497	-0.106809	-0.150724	-0.313941	-0.540474	-0.697558	-0.706205	-0.597705	-0.414784	-0.191324	0.013873	0.183556	0.328313	0.395287	0.403812	0.362245	0.29881	0.230962	0.19484	0.199905	0.305076	0.473805	0.644098	0.799161	0.869999	0.812375	0.673634	0.537509	0.491865	0.598063	0.766081	0.953715	1.05734	1.05327	0.941311	0.799741	0.681719	0.600458	0.566684	0.559149	0.612724	0.666198	0.696079	0.711813
-0.0508255	0.131108	0.245161	0.331542	0.366951	0.383208	0.432537	0.487005	0.570443	0.669345	0.796749	0.896432	0.979696	0.944757	0.784454	0.527124	0.262908	0.0684651	-0.0685325	-0.138804	-0.169282	-0.0411518	0.173246	0.393516	0.492075	0.475007	0.413381	0.384488	0.42896	0.557186	0.711578	0.912802	1.11484	1.35298	1.47877	1.49625	1.39786	1.20156	0.898509	0.518679	0.172163	-0.0397051	-0.0598869	0.0540171	0.201636	0.224385	0.156279	0.0672853	0.0406298	0.0353842
0.864828	0.864274	0.793355	0.691178	0.527598	0.411619	0.337296	0.33381	0.351852	0.347707	0.368538	0.41986	0.49899	0.530317	0.416275	0.24269	0.0396043	-0.0891135	-0.141807	-0.0852686	0.0301714	0.158403	0.135972	0.0844039	0.119973	0.284662	0.575075	0.838812	1.02653	1.0623	0.962936	0.74458	0.482348	0.204266	-0.0974204	-0.320445	-0.371234	-0.223403	0.0717076	0.417148	0.683281	0.894644	1.02206	1.14808	1.20251	1.15856	0.997595	0.817966	0.641472	0.598358
-0.173271	-0.160394	-0.0858267	0.0953491	0.277063	0.466026	0.61167	0.681862	0.618756	0.545074	0.49111	0.513992	0.601727	0.654798	0.673008	0.598307	0.469801	0.36554	0.368327	0.494353	0.633442	0.765558	0.80633	0.744384	0.583831	0.46663	0.453756	0.55369	0.722896	0.838429	0.902001	0.898739	0.944944	0.981149	0.974572	0.95897	0.939212	0.962947	1.06008	1.1408	1.18859	1.25886	1.28083	1.25547	1.18928	1.10749	0.986817	0.819881	0.662045	0.665503
1.03945	0.827122	0.548647	0.284424	0.0445321	-0.122044	-0.227754	-0.204461	-0.0294211	0.157947	0.314334	0.390207	0.399129	0.354408	0.280748	0.198151	0.128307	0.0274456	-0.120754	-0.258651	-0.379928	-0.386777	-0.273174	-0.104951	0.00360512	-0.0546578	-0.270327	-0.493415	-0.616226	-0.600807	-0.480144	-0.369966	-0.27821	-0.259569	-0.245614	-0.252601	-0.25615	-0.275872	-0.258808	-0.137462	-0.0289945	-0.00112513	-0.0927186	-0.196237	-0.302606	-0.310909	-0.23917	-0.145076	-0.0626979	-0.0539371
0.523952	0.426964	0.358414	0.297217	0.272017	0.29408	0.336647	0.412132	0.521669	0.695911	0.836197	0.831896	0.698201	0.489451	0.328252	0.321267	0.343862	0.341333	0.336671	0.317903	0.292972	0.239287	0.0743798	-0.174413	-0.46765	-0.724105	-0.847289	-0.807505	-0.659841	-0.414076	-0.124231	0.144947	0.372718	0.57467	0.780121	0.986974	1.19698	1.31742	1.30587	1.17065	0.937569	0.637991	0.389858	0.209141	0.128582	0.1531	0.303556	0.494363	0.678511	0.768274
-0.535849	-0.607317	-0.725939	-0.815247	-0.826578	-0.700371	-0.417439	-0.0823317	0.214977	0.241728	0.0230625	-0.233955	-0.461973	-0.571242	-0.616184	-0.608991	-0.54718	-0.473973	-0.390174	-0.328545	-0.342659	-0.47945	-0.642665	-0.795677	-0.896015	-0.87388	-0.767721	-0.60827	-0.483119	-0.429541	-0.330892	-0.167143	0.0144953	0.0590488	0.0253344	0.00679659	0.155965	0.292827	0.381002	0.251554	-0.020069	-0.328677	-0.518614	-0.535141	-0.387187	-0.158219	0.0144979	-0.0283813	-0.328086	-0.689015
-0.643562	-0.700744	-0.792392	-0.930793	-1.06774	-1.16793	-1.11063	-0.854235	-0.412019	0.0778864	0.486027	0.695989	0.744728	0.652122	0.502989	0.461518	0.542417	0.764246	1.00647	1.12149	1.09566	0.987945	0.828375	0.685842	0.581526	0.489962	0.424937	0.36627	0.335738	0.338522	0.346344	0.364651	0.470621	0.576731	0.705588	0.768994	0.803289	0.827404	0.863387	0.89383	0.954943	0.994459	0.914563	0.799568	0.697008	0.623394	0.602257	0.665777	0.76597	0.881586
-0.595061	-0.443203	-0.249307	-0.0489425	0.154806	0.367891	0.5118	0.560728	0.474217	0.339395	0.307653	0.402729	0.596234	0.778182	0.839935	0.76225	0.619848	0.529581	0.519895	0.613192	0.741694	0.854378	0.912249	0.912637	0.866891	0.806236	0.66792	0.495879	0.390456	0.413927	0.569931	0.768684	0.919868	1.06346	1.18463	1.24372	1.18996	1.02643	0.77953	0.506426	0.309496	0.280342	0.445574	0.650891	0.79494	0.820608	0.754465	0.575735	0.402642	0.296841
-0.163171	-0.15047	-0.165562	-0.205999	-0.307306	-0.446336	-0.547528	-0.545234	-0.477047	-0.385369	-0.251056	-0.100701	0.00384595	0.0892293	0.0614246	0.0505295	-0.0264383	-0.110221	-0.205849	-0.318765	-0.43318	-0.450916	-0.433464	-0.297188	-0.12471	-0.0265831	-0.0201545	-0.15241	-0.368111	-0.545302	-0.610756	-0.586607	-0.542647	-0.561872	-0.598743	-0.599572	-0.561331	-0.50641	-0.437634	-0.376388	-0.334267	-0.309918	-0.243898	-0.201513	-0.152481	-0.109365	-0.0764701	-0.0459392	-0.100173	-0.163842
1.09413	0.985809	0.851891	0.787571	0.816202	0.869719	0.875761	0.788053	0.565787	0.378961	0.27658	0.289901	0.348103	0.410829	0.398831	0.306146	0.179439	0.0783872	0.0108764	0.046245	0.169357	0.38744	0.631321	0.761733	0.812527	0.794486	0.713628	0.625208	0.559706	0.571707	0.733112	0.910891	0.997869	0.981469	0.834209	0.60004	0.360882	0.144515	-0.0758742	-0.269123	-0.392619	-0.404482	-0.317359	-0.163611	0.0415507	0.187351	0.209763	0.112111	-0.0307627	0.00911663
0.17085	0.151497	0.184517	0.249995	0.327425	0.311107	0.227395	0.09063	-0.0521609	-0.137184	-0.144329	-0.15427	-0.124464	-0.103419	-0.0951578	-0.164723	-0.270942	-0.329751	-0.291662	-0.145231	0.0771768	0.261767	0.328822	0.288227	0.200026	0.136421	0.117644	0.12809	0.140918	0.110188	0.0183567	-0.0545537	-0.0982354	-0.0835762	-0.0178286	0.0693382	0.130837	0.144464	0.14791	0.107904	0.0731085	0.0916397	0.084828	-0.0382099	-0.270861	-0.470797	-0.509688	-0.402253	-0.206276	-0.0423769
-0.507814	-0.231366	0.0410545	0.196736	0.278677	0.335678	0.415028	0.470323	0.482856	0.437703	0.37712	0.310539	0.290477	0.256215	0.16501	-0.0451645	-0.243643	-0.394734	-0.476476	-0.514674	-0.575867	-0.713435	-0.845725	-0.915715	-0.912733	-0.772628	-0.577028	-0.321052	-0.143626	-0.0527713	-0.143488	-0.280146	-0.364819	-0.315533	-0.13229	0.0942269	0.316533	0.46337	0.521328	0.481557	0.339929	0.169082	0.0341484	0.000395384	0.0282348	0.106736	0.164836	0.266093	0.407132	0.577597
0.922104	0.798593	0.615993	0.426028	0.213701	-0.00591981	-0.179116	-0.328968	-0.453323	-0.505401	-0.52171	-0.42296	-0.152165	0.225706	0.552816	0.688529	0.5646	0.308051	0.0743263	-0.0606241	-0.0303083	0.0925454	0.205429	0.221959	0.132345	0.0335934	0.0239658	0.114245	0.292198	0.500091	0.71547	0.882877	1.01603	1.11575	1.18399	1.15859	1.0624	0.837338	0.570259	0.299535	0.0927291	0.0248709	0.034286	0.106568	0.253722	0.42807	0.580736	0.644235	0.637829	0.605051
0.142027	0.148191	0.0603598	-0.101087	-0.228314	-0.260071	-0.0918004	0.176209	0.495294	0.756901	0.884706	0.821192	0.628742	0.421701	0.256364	0.15533	0.14074	0.173897	0.244684	0.346416	0.436426	0.443048	0.392127	0.248724	0.0520449	-0.0933817	-0.143042	-0.0484648	0.133896	0.304775	0.380335	0.384578	0.318986	0.294021	0.281883	0.28167	0.345385	0.407447	0.439683	0.341833	0.177483	0.0282933	-0.0243063	0.00659062	0.0604096	0.0787175	-0.0392448	-0.204994	-0.387694	-0.506467
0.83321	0.749334	0.625598	0.49946	0.352595	0.250975	0.210307	0.272924	0.341262	0.458391	0.54388	0.607921	0.642816	0.718591	0.799184	0.821743	0.80949	0.810166	0.87294	0.875856	0.849737	0.716611	0.517923	0.312844	0.189675	0.144654	0.206246	0.279967	0.271507	0.261789	0.196111	0.142937	0.151088	0.218687	0.367884	0.531403	0.642372	0.69305	0.658104	0.610057	0.657253	0.715351	0.722695	0.683517	0.536374	0.373497	0.256098	0.252289	0.317825	0.413886
-0.399921	-0.303799	-0.209291	-0.163663	-0.15861	-0.198061	-0.191138	-0.115914	0.0890735	0.308811	0.39197	0.335925	0.228126	0.136134	0.0949001	0.0458739	-0.0181276	-0.0945468	-0.218853	-0.290875	-0.287595	-0.213141	-0.0936962	0.0671353	0.213815	0.384307	0.514374	0.579401	0.555809	0.447184	0.334535	0.210318	0.0612354	-0.143006	-0.34784	-0.509641	-0.564248	-0.508664	-0.417045	-0.365517	-0.41463	-0.492806	-0.514975	-0.439552	-0.27403	-0.0819769	0.100937	0.239055	0.310813	0.298328
0.407209	0.341656	0.308048	0.264609	0.220478	0.186641	0.12008	0.00578542	-0.149777	-0.24796	-0.266709	-0.173806	-0.018029	0.108043	0.125606	0.110021	0.0449894	0.0238684	0.0734105	0.152715	0.231492	0.269276	0.243531	0.127454	-0.0213568	-0.154848	-0.262422	-0.340451	-0.356766	-0.29203	-0.223865	-0.181281	-0.167439	-0.241764	-0.322637	-0.317115	-0.0963424	0.240544	0.602558	0.805141	0.76905	0.607376	0.318399	0.118871	0.000281644	-0.0242464	-0.0343634	-0.0476407	-0.128772	-0.128429
-0.637569	-0.59361	-0.454947	-0.271478	-0.0225327	0.209722	0.397562	0.497089	0.555722	0.593193	0.634449	0.64755	0.629513	0.560659	0.404571	0.291168	0.18797	0.155902	0.162591	0.236411	0.356372	0.473553	0.506844	0.489329	0.435081	0.414071	0.408619	0.357629	0.242835	0.103128	-0.0287423	-0.086153	-0.0695666	0.0186663	0.126895	0.195518	0.137374	0.0191776	-0.136095	-0.220143	-0.262667	-0.266172	-0.312299	-0.40974	-0.501578	-0.553363	-0.510464	-0.402102	-0.247661	-0.0337179
-0.334068	-0.306689	-0.22346	-0.0373913	0.184432	0.398524	0.491084	0.415655	0.246296	0.0924382	0.019417	0.0747662	0.187525	0.242715	0.249756	0.226437	0.281508	0.428306	0.54822	0.621897	0.629203	0.629112	0.681979	0.77856	0.847317	0.843808	0.809771	0.826291	0.951665	1.08226	1.18613	1.1453	1.02784	0.878584	0.701698	0.574286	0.465699	0.35187	0.248763	0.193847	0.184027	0.238715	0.269869	0.31357	0.363959	0.369008	0.397325	0.48964	0.691091	0.949343
-0.91362	-1.05395	-1.05266	-0.900931	-0.631032	-0.303646	-0.0130184	0.167516	0.187518	0.098577	-0.00186228	-0.0887037	-0.112268	-0.0656133	0.0584653	0.232179	0.36787	0.362031	0.24639	0.0853706	0.0519269	0.121231	0.232375	0.297729	0.291913	0.251873	0.341235	0.555993	0.814826	0.947292	0.929867	0.775817	0.481603	0.15119	-0.128168	-0.243557	-0.228872	-0.0961061	0.0279429	0.0553511	0.0219991	-0.0641895	-0.164872	-0.205169	-0.180009	-0.162328	-0.137918	-0.0947731	0.045596	0.257109
-1.34616	-1.30073	-1.16261	-0.940274	-0.715801	-0.582091	-0.632897	-0.839046	-1.07732	-1.30347	-1.38876	-1.33493	-1.22926	-1.16341	-1.18158	-1.22125	-1.31538	-1.45536	-1.61924	-1.75783	-1.85795	-1.91183	-1.92084	-1.83906	-1.77955	-1.72467	-1.62514	-1.40482	-1.08347	-0.703296	-0.451708	-0.359516	-0.421935	-0.537065	-0.571421	-0.512276	-0.39254	-0.292194	-0.186996	-0.168652	-0.19477	-0.349553	-0.587318	-0.804024	-0.923653	-0.86246	-0.695068	-0.387226	-0.0827116	0.155897
0.367096	0.438261	0.449727	0.416055	0.330211	0.261545	0.206143	0.22014	0.23995	0.302557	0.313666	0.292008	0.218706	0.0799188	0.01258	0.00761569	0.093722	0.20851	0.310648	0.371158	0.330769	0.200327	0.143128	0.286233	0.550126	0.840482	1.03396	0.998731	0.837296	0.603961	0.37558	0.17825	0.0586572	0.0335225	0.0930779	0.161684	0.212677	0.166259	0.0309483	-0.121377	-0.16792	-0.158466	-0.0887139	-0.0222677	0.0191736	-0.0361804	-0.175518	-0.264663	-0.157287	0.116675
-0.141147	-0.339351	-0.555614	-0.737985	-0.825212	-0.860915	-0.836158	-0.739459	-0.587197	-0.405823	-0.218433	-0.125282	-0.177214	-0.337729	-0.523073	-0.67022	-0.714831	-0.644276	-0.453262	-0.229184	-0.0612584	-0.0187665	-0.06942	-0.142128	-0.107295	0.0488056	0.323661	0.616022	0.838421	0.969824	0.983976	0.901933	0.82981	0.771482	0.718452	0.664291	0.540552	0.342043	0.121199	-0.0641511	-0.138281	-0.0748451	0.137379	0.385912	0.614309	0.736303	0.683768	0.507906	0.279466	0.107684
-0.303178	-0.280904	-0.350754	-0.468597	-0.553206	-0.534882	-0.33395	-0.040326	0.183695	0.217226	0.159034	0.0773237	0.00489591	0.0122481	0.0841422	0.156363	0.2012	0.21058	0.126714	-0.0597752	-0.31466	-0.512641	-0.537973	-0.446045	-0.289365	-0.131216	-0.040135	0.060355	0.172729	0.31417	0.448475	0.632331	0.768729	0.84624	0.805317	0.665535	0.488277	0.284774	0.113981	-0.00646628	-0.117764	-0.193184	-0.260665	-0.292196	-0.254576	-0.133982	-0.00572732	0.0962842	0.156988	0.248682
-0.319535	-0.331385	-0.393914	-0.424593	-0.468751	-0.483929	-0.473508	-0.405364	-0.3168	-0.185178	-0.0648713	0.0487572	0.113574	0.080589	-0.0654185	-0.2697	-0.487269	-0.607105	-0.61283	-0.550851	-0.452977	-0.384437	-0.304028	-0.19248	0.00112475	0.194635	0.314779	0.282967	0.177451	0.0695665	0.0178289	0.0271777	0.0762957	0.168803	0.219434	0.282391	0.331204	0.455364	0.613224	0.730065	0.80934	0.78302	0.750186	0.745433	0.772826	0.784667	0.799772	0.779761	0.754522	0.728776
1.37869	1.48858	1.56924	1.51196	1.3516	1.09802	0.865923	0.671105	0.49431	0.295953	0.106036	-0.0687443	-0.230414	-0.355519	-0.473153	-0.480601	-0.405395	-0.176347	0.128882	0.486806	0.744098	0.96138	1.09141	1.15801	1.14288	1.00147	0.80058	0.550097	0.333209	0.21979	0.179286	0.187742	0.256675	0.378284	0.503206	0.627544	0.728534	0.780358	0.717958	0.531325	0.299296	0.0962302	0.0691225	0.251079	0.511762	0.77283	0.887669	0.845824	0.677449	0.502861
-0.208727	-0.140593	-0.111229	-0.120771	-0.168695	-0.254071	-0.284871	-0.20939	-0.0761211	0.143055	0.315373	0.466415	0.625552	0.735668	0.739786	0.58277	0.311298	0.0274589	-0.113775	-0.118307	-0.0468562	0.0220272	0.0344524	0.0741035	0.177331	0.307499	0.421201	0.527486	0.591283	0.6828	0.761288	0.748121	0.695246	0.543935	0.357561	0.182102	0.0787652	0.0719983	0.0818755	0.0346288	-0.133662	-0.380782	-0.618723	-0.718523	-0.615124	-0.367357	-0.149899	-0.0620441	-0.15018	-0.360119
-0.666708	-0.487915	-0.265834	-0.031368	0.12268	0.159344	0.0968606	0.0307712	0.015173	0.0257741	0.033152	-0.00858204	-0.104246	-0.175246	-0.134986	0.0177955	0.21658	0.358988	0.39449	0.342531	0.276343	0.243607	0.245173	0.263887	0.270195	0.204275	0.0899067	-0.0791534	-0.233005	-0.30032	-0.241793	-0.0747954	0.140796	0.352018	0.512313	0.621714	0.675424	0.712243	0.715647	0.672782	0.631158	0.515759	0.382761	0.265827	0.206273	0.180595	0.174447	0.137724	0.0316547	-0.0909214
0.752945	0.541463	0.296579	0.0510935	-0.199017	-0.34312	-0.327775	-0.19032	-0.0315658	0.0337663	0.0364683	0.0217658	0.0025656	0.0352757	0.135773	0.144729	0.155716	0.0504034	-0.132316	-0.381304	-0.555704	-0.638787	-0.622601	-0.508434	-0.279152	0.0593722	0.373268	0.584588	0.68139	0.787255	0.804856	0.724109	0.573442	0.380096	0.235672	0.178249	0.18848	0.237419	0.344414	0.483057	0.611702	0.711493	0.781212	0.844818	0.902157	0.975006	1.05604	1.04132	0.931964	0.766572
0.296278	0.14293	-0.0204865	-0.130684	-0.0855084	0.0628727	0.308153	0.50057	0.50698	0.309437	-0.0112299	-0.303194	-0.441934	-0.413359	-0.32207	-0.210676	-0.18626	-0.123935	-0.00224175	0.102108	0.195224	0.221584	0.194181	0.129985	0.0126988	-0.0639776	-0.0468539	0.082807	0.263725	0.455953	0.620793	0.702227	0.695448	0.671492	0.631351	0.531855	0.387908	0.196241	-0.0562598	-0.31182	-0.487751	-0.525647	-0.410949	-0.289486	-0.242226	-0.305235	-0.50877	-0.845533	-1.1588	-1.36418
0.756846	0.8204	0.809535	0.74963	0.578562	0.377889	0.228627	0.196174	0.349902	0.602447	0.864596	1.09857	1.24921	1.24845	1.09327	0.836041	0.603107	0.452744	0.35457	0.355675	0.390483	0.413206	0.385905	0.362972	0.358078	0.446258	0.627875	0.894166	1.14778	1.32936	1.41847	1.35402	1.19886	1.00449	0.822296	0.622238	0.467861	0.411815	0.526831	0.795326	1.11703	1.38457	1.53762	1.54651	1.3878	1.15864	0.925122	0.730308	0.683999	0.735358
2.17065	2.03519	1.90661	1.82591	1.79821	1.76761	1.67678	1.50959	1.25559	1.05969	1.05215	1.24824	1.52636	1.79808	1.94156	1.98481	2.01296	2.09007	2.16581	2.09442	1.8604	1.57597	1.27955	1.08743	1.02041	1.02311	1.09488	1.22612	1.39516	1.59397	1.72655	1.76396	1.69509	1.57956	1.49515	1.59298	1.93122	2.40186	2.81936	3.00579	2.93861	2.64213	2.29786	2.09741	2.10419	2.26125	2.43722	2.56646	2.53937	2.32916
0.760779	0.558391	0.27635	-0.0672636	-0.314898	-0.484666	-0.501076	-0.373186	-0.116331	0.177688	0.459995	0.629609	0.59338	0.344846	-0.0251878	-0.329585	-0.517952	-0.600096	-0.515329	-0.253605	0.11764	0.497365	0.78316	0.945827	1.03797	1.13559	1.22386	1.30328	1.28732	1.19955	1.07272	0.904415	0.739435	0.626716	0.567725	0.571175	0.627809	0.724615	0.827709	0.896789	0.92681	0.847761	0.739199	0.616856	0.517992	0.416811	0.305908	0.220403	0.248392	0.425962
0.090022	-0.158855	-0.365934	-0.508455	-0.538035	-0.393766	-0.155231	0.147263	0.402646	0.495309	0.465319	0.368063	0.297355	0.267791	0.246739	0.244137	0.27978	0.320402	0.399183	0.44014	0.384475	0.252997	0.0331976	-0.119552	-0.140073	0.00469118	0.269942	0.498353	0.590147	0.59693	0.487994	0.344907	0.284454	0.315583	0.442456	0.577414	0.625358	0.550008	0.26175	-0.0732301	-0.307491	-0.287142	-0.0439695	0.231966	0.471993	0.584655	0.603679	0.512528	0.406193	0.292896
0.902427	0.690728	0.425377	0.139885	-0.046407	-0.0469327	0.11511	0.332259	0.499003	0.542014	0.464025	0.300625	0.121487	-0.0236664	-0.166626	-0.327059	-0.441881	-0.487549	-0.454937	-0.338244	-0.204639	-0.103913	-0.0973553	-0.170368	-0.27031	-0.311697	-0.377677	-0.446013	-0.568854	-0.683531	-0.752251	-0.713938	-0.602301	-0.472137	-0.400775	-0.418125	-0.463707	-0.419741	-0.252566	0.0479943	0.321892	0.462941	0.389891	0.240564	0.0488909	-0.0458981	-0.0696533	-0.0738655	-0.1053	-0.172412
-0.110327	0.054859	0.289204	0.528465	0.76818	0.95958	1.06158	1.1026	1.06706	0.990408	0.84132	0.681665	0.594543	0.614492	0.706529	0.812796	0.866745	0.874046	0.86567	0.894616	0.938402	0.979819	0.964804	0.897358	0.833489	0.801904	0.787272	0.800689	0.839421	0.910025	1.04704	1.21136	1.34764	1.45315	1.49907	1.49477	1.45661	1.3855	1.26557	1.0904	0.903678	0.743458	0.66529	0.69914	0.819951	0.934846	0.964757	0.893909	0.70571	0.432906
0.424666	0.510513	0.650473	0.784363	0.872755	0.882969	0.792485	0.64423	0.531849	0.470225	0.462244	0.422159	0.368057	0.317914	0.338783	0.319372	0.227516	0.0502431	-0.135948	-0.154824	-0.0113779	0.189872	0.371107	0.451911	0.541158	0.726167	1.01415	1.25616	1.41809	1.348	1.11292	0.778415	0.50622	0.405822	0.504358	0.776952	1.13639	1.41753	1.51427	1.39833	1.17792	0.937282	0.855095	0.930867	1.101	1.36317	1.639	1.87142	1.98792	1.9913
1.18831	1.12611	1.00163	0.8956	0.772111	0.608556	0.474201	0.392483	0.386657	0.394149	0.422341	0.394086	0.381919	0.341474	0.317725	0.294689	0.221519	0.106615	-0.0695692	-0.265392	-0.470462	-0.567481	-0.575607	-0.531161	-0.427121	-0.319442	-0.213994	-0.180065	-0.186402	-0.231513	-0.303451	-0.346314	-0.313686	-0.160126	0.0800459	0.323836	0.522153	0.575628	0.466508	0.199264	-0.103408	-0.368744	-0.505889	-0.49859	-0.360725	-0.174087	-0.0259918	0.015383	-0.0202066	-0.163669
1.51408	1.37196	1.1125	0.830184	0.535467	0.257606	-0.0237478	-0.270488	-0.462753	-0.457522	-0.2815	0.0451005	0.342171	0.542195	0.604799	0.584148	0.501053	0.404292	0.302634	0.212768	0.0716774	-0.105837	-0.229224	-0.193405	0.0236123	0.244676	0.410878	0.443518	0.365461	0.272215	0.250195	0.290086	0.413132	0.577119	0.757427	0.961365	1.06655	1.09985	1.0137	0.85062	0.620269	0.411599	0.312548	0.400252	0.594149	0.771924	0.85884	0.828838	0.820023	0.901295
-0.0877815	-0.172709	-0.250289	-0.309302	-0.292861	-0.257858	-0.183143	-0.0630561	0.0943226	0.236083	0.34848	0.370658	0.310095	0.203009	0.176598	0.233148	0.417821	0.611862	0.777317	0.8321	0.801263	0.700945	0.558903	0.340021	0.0919527	-0.171488	-0.430177	-0.668456	-0.919145	-1.10865	-1.18474	-1.14476	-1.04448	-0.94269	-0.801024	-0.654566	-0.471082	-0.302971	-0.183081	-0.182125	-0.280886	-0.474999	-0.638032	-0.751621	-0.879179	-1.02368	-1.17195	-1.27824	-1.25376	-1.08929
0.977225	0.607979	0.300926	0.0907423	0.0174337	0.0101838	0.0587775	0.1043	0.206734	0.367215	0.581783	0.719128	0.710671	0.549601	0.322467	0.119744	0.0274087	-0.0127339	-0.0340635	-0.0775709	-0.184388	-0.288308	-0.363227	-0.373367	-0.36664	-0.302573	-0.181182	-0.011975	0.165731	0.248255	0.187248	-0.0297411	-0.222342	-0.323681	-0.208626	-0.0469484	0.144857	0.311245	0.411154	0.486168	0.490605	0.520748	0.448739	0.333472	0.139022	-0.0819126	-0.275571	-0.37327	-0.343682	-0.177492
0.656508	0.544087	0.403553	0.151847	-0.0898151	-0.270652	-0.408846	-0.473802	-0.483022	-0.579099	-0.749111	-1.00257	-1.15967	-1.16628	-0.995819	-0.649336	-0.25849	0.0497581	0.229706	0.335359	0.333772	0.157991	-0.119027	-0.473236	-0.709647	-0.8096	-0.793232	-0.665114	-0.534875	-0.36465	-0.180602	-0.0427828	0.00276717	0.0341655	0.000357899	-0.0196381	0.0651565	0.192465	0.34701	0.422693	0.48393	0.591673	0.703625	0.69056	0.504208	0.187278	-0.14662	-0.31649	-0.273185	-0.0947906
0.0761531	-0.0167306	-0.0920041	-0.060824	0.12922	0.413543	0.658009	0.67124	0.529482	0.294398	0.13464	0.121143	0.16621	0.241425	0.345026	0.39812	0.394326	0.315379	0.238954	0.183551	0.113336	0.0216356	-0.113891	-0.28204	-0.387836	-0.377615	-0.282061	-0.21983	-0.260951	-0.347312	-0.355637	-0.28551	-0.147783	-0.00766116	0.0450382	0.0275188	-0.0348107	-0.0549121	-0.142069	-0.234257	-0.288352	-0.299204	-0.222141	-0.0617353	0.150941	0.333588	0.373354	0.253568	0.0438027	-0.247267
-0.6613	-0.428532	-0.138712	0.122656	0.348134	0.442349	0.391882	0.22596	0.0744632	-0.0277146	-0.0921993	-0.183996	-0.405949	-0.627669	-0.727195	-0.601058	-0.281556	0.0498647	0.238161	0.186337	0.0888716	0.0916615	0.232676	0.415156	0.571835	0.625026	0.611026	0.551954	0.463313	0.354149	0.177594	-0.0616842	-0.290902	-0.473195	-0.50031	-0.402138	-0.214278	0.00677437	0.151277	0.203724	0.207786	0.243724	0.395734	0.57443	0.727255	0.781212	0.682058	0.482258	0.323002	0.214679
-0.317081	-0.266081	-0.336437	-0.554173	-0.772446	-0.900843	-0.875173	-0.677252	-0.382203	-0.0549852	0.20783	0.321753	0.342604	0.244607	0.0906832	-0.0613125	-0.147819	-0.141261	-0.101413	-0.0936401	-0.140999	-0.125757	-0.0387685	0.0787798	0.187732	0.245567	0.275887	0.31125	0.329391	0.342763	0.354137	0.333575	0.280806	0.115577	-0.155889	-0.441656	-0.682028	-0.804101	-0.760662	-0.597493	-0.316722	-0.0699346	0.134308	0.264319	0.27223	0.147182	0.0379808	0.000248282	0.0456598	0.152456
-0.0848797	0.0319015	0.16565	0.335717	0.440987	0.454991	0.418011	0.328614	0.301278	0.333323	0.46452	0.628129	0.730127	0.702637	0.548041	0.360862	0.164847	0.0342677	-0.0460267	-0.0448957	-0.0293129	-0.019675	0.00347091	0.0252222	0.0554838	0.0971917	0.1718	0.241312	0.315202	0.401058	0.502795	0.524396	0.481054	0.346167	0.116175	-0.110737	-0.283175	-0.400169	-0.429524	-0.395428	-0.336505	-0.277712	-0.305675	-0.388074	-0.507993	-0.665803	-0.771608	-0.730734	-0.538527	-0.259455
0.156991	0.00290478	-0.25577	-0.602397	-0.954	-1.16138	-1.21756	-1.16028	-0.990055	-0.678675	-0.295164	0.117303	0.397799	0.474295	0.381587	0.24889	0.212019	0.276518	0.330722	0.29194	0.0521982	-0.31495	-0.751446	-1.0972	-1.30949	-1.40989	-1.43781	-1.48266	-1.52972	-1.51176	-1.40769	-1.08203	-0.628187	-0.255371	-0.0532624	-0.0811476	-0.236947	-0.39377	-0.490395	-0.46146	-0.399505	-0.380155	-0.375674	-0.396164	-0.437714	-0.495747	-0.541739	-0.486146	-0.290046	-0.0166612
0.447075	0.38905	0.342921	0.31747	0.255945	0.178787	0.0536074	-0.0865292	-0.106178	0.0614214	0.245346	0.427268	0.524193	0.534677	0.521934	0.492677	0.511967	0.487656	0.467052	0.470737	0.51555	0.571781	0.581851	0.534341	0.448605	0.367402	0.304488	0.260202	0.141283	-0.0831103	-0.3616	-0.604927	-0.745987	-0.738247	-0.622553	-0.438362	-0.252536	-0.105158	0.0127242	0.0864699	0.174677	0.328998	0.432485	0.444556	0.357514	0.239308	0.102532	0.0226095	0.0711746	0.183814
-0.429851	-0.254358	-0.0771852	0.0797356	0.144124	0.139073	0.137394	0.169795	0.236724	0.306247	0.253783	0.116907	-0.0668097	-0.253727	-0.307663	-0.250124	-0.148386	-0.0928938	-0.141446	-0.282183	-0.399847	-0.491897	-0.495336	-0.420067	-0.285455	-0.179919	-0.140021	-0.19422	-0.260033	-0.257045	-0.174015	-0.0560629	-0.054206	-0.149191	-0.224378	-0.196203	-0.00452181	0.273668	0.480199	0.557896	0.594526	0.619303	0.640748	0.667795	0.667586	0.631459	0.552906	0.429774	0.334452	0.321033
0.575157	0.535196	0.496953	0.521708	0.492361	0.442525	0.337338	0.248135	0.17653	0.127223	0.0868608	0.0566114	0.0298252	0.00746344	0.00892747	0.00893456	0.0132258	0.0579949	0.218517	0.484875	0.769753	1.02026	1.20238	1.31215	1.38563	1.38884	1.36777	1.31642	1.28685	1.26526	1.18238	1.05984	0.916752	0.72282	0.499329	0.316637	0.215076	0.233079	0.364811	0.544348	0.740796	0.879617	0.908455	0.928267	0.921425	0.926425	0.922189	0.868724	0.792918	0.776545
0.107572	0.14025	0.258072	0.481904	0.715145	0.862211	0.917377	0.893857	0.878652	0.911765	0.983501	1.09632	1.23521	1.26537	1.18301	1.04291	0.887568	0.783282	0.702319	0.611199	0.465875	0.388765	0.379073	0.458729	0.663973	0.933406	1.20343	1.43177	1.55517	1.60594	1.5122	1.35783	1.23321	1.15992	1.08569	0.956678	0.783502	0.557355	0.298143	0.0606857	-0.146922	-0.232315	-0.154824	0.160499	0.52703	0.921461	1.25368	1.4969	1.62612	1.66167
-1.22672	-1.12739	-0.97156	-0.753609	-0.518829	-0.351673	-0.300502	-0.385788	-0.50507	-0.574267	-0.707152	-0.868388	-1.12316	-1.3742	-1.49683	-1.48443	-1.39916	-1.25555	-1.0236	-0.816602	-0.643395	-0.667838	-0.782965	-0.901111	-0.936671	-0.845677	-0.6699	-0.477973	-0.312927	-0.164767	-0.01057	0.198938	0.376585	0.512839	0.521956	0.450845	0.366441	0.402123	0.556094	0.732671	0.813323	0.727725	0.56873	0.397298	0.265728	0.149272	-0.0399829	-0.229365	-0.436884	-0.596031
-0.101001	-0.00156363	-0.00301735	-0.0579861	-0.182047	-0.294037	-0.45122	-0.653279	-0.919336	-1.24552	-1.44404	-1.4994	-1.41173	-1.27761	-1.13667	-1.04939	-0.979111	-0.824614	-0.677291	-0.569724	-0.508555	-0.425905	-0.278704	-0.1304	-0.0120509	0.112296	0.286415	0.456239	0.636116	0.736013	0.670297	0.522051	0.304565	0.138619	0.032732	0.0121767	0.0471557	0.0799009	0.0909137	0.105927	0.0838701	0.04863	0.0497278	0.119683	0.196625	0.246207	0.200999	0.0606995	-0.154108	-0.319138
0.405137	0.450883	0.505244	0.560713	0.624375	0.689919	0.75881	0.824046	0.872025	0.881712	0.830712	0.708722	0.533876	0.346197	0.185676	0.0689224	-0.012833	-0.0720535	-0.111625	-0.129472	-0.134609	-0.145415	-0.173229	-0.217537	-0.254375	-0.257622	-0.211589	-0.130514	-0.0499744	0.00236342	0.0185426	0.0101478	-0.0110796	-0.0218487	-0.0276108	-0.0314255	-0.0386057	-0.0508675	-0.0553478	-0.0512735	-0.0317186	0.0060107	0.0439252	0.0610671	0.0573279	0.042689	0.0347228	0.0531317	0.103679	0.17971
-1.62646	-1.53776	-1.46423	-1.44153	-1.49541	-1.61828	-1.73625	-1.76156	-1.66203	-1.47086	-1.27178	-1.12752	-1.02962	-0.885808	-0.691773	-0.443871	-0.187266	0.0366748	0.178172	0.219135	0.141223	-0.0383928	-0.271326	-0.495878	-0.633065	-0.680457	-0.627032	-0.520743	-0.402049	-0.322438	-0.304193	-0.323247	-0.338782	-0.33711	-0.3187	-0.284674	-0.247256	-0.229926	-0.220123	-0.211322	-0.167869	-0.0867087	0.00654618	0.0928859	0.161125	0.194445	0.194622	0.157626	0.0853973	0.0138761
-0.403379	-0.391163	-0.334527	-0.221562	-0.04465	0.178773	0.419974	0.642687	0.82104	0.92866	0.960879	0.919411	0.833565	0.747095	0.683704	0.648172	0.618982	0.582351	0.531216	0.477131	0.424328	0.369509	0.308901	0.24991	0.22855	0.254994	0.33311	0.450204	0.607254	0.804318	1.04402	1.30291	1.53133	1.6727	1.72658	1.72648	1.71175	1.69958	1.69642	1.69397	1.68305	1.65659	1.60662	1.54404	1.48286	1.44228	1.41907	1.42116	1.43152	1.45069
0.814609	0.812948	0.812297	0.804349	0.788248	0.763281	0.737804	0.724707	0.725217	0.729803	0.730729	0.717004	0.680058	0.611459	0.513802	0.396163	0.273156	0.156612	0.0501967	-0.0504572	-0.154957	-0.261771	-0.363912	-0.453785	-0.512752	-0.528785	-0.493777	-0.423824	-0.335979	-0.250874	-0.18655	-0.146749	-0.125518	-0.120147	-0.125737	-0.131353	-0.137053	-0.140354	-0.139118	-0.128402	-0.106174	-0.0763278	-0.0400871	-0.00536556	0.0326569	0.0759098	0.140056	0.234559	0.354613	0.479196
-0.533526	-0.516351	-0.493015	-0.463926	-0.440045	-0.436809	-0.457986	-0.487664	-0.517257	-0.536105	-0.533047	-0.511321	-0.483798	-0.466956	-0.464666	-0.47049	-0.48377	-0.505427	-0.52499	-0.530283	-0.532552	-0.529334	-0.520838	-0.517763	-0.504201	-0.471307	-0.401318	-0.285994	-0.10382	0.12383	0.372086	0.598618	0.745661	0.795766	0.762877	0.703144	0.646227	0.607726	0.606786	0.659152	0.76866	0.926126	1.13739	1.36447	1.57613	1.76383	1.90959	2.02278	2.10192	2.14885
-2.09798	-2.05582	-2.02779	-2.02422	-2.04511	-2.07297	-2.10898	-2.13122	-2.11892	-2.05206	-1.91055	-1.71719	-1.5084	-1.32701	-1.18446	-1.06147	-0.930949	-0.786531	-0.609979	-0.412908	-0.225738	-0.0585118	0.0566554	0.117317	0.114978	0.0788432	0.0304199	-0.0148844	-0.0220804	0.0340602	0.197936	0.47524	0.834173	1.18495	1.47166	1.6756	1.82757	1.93825	2.03186	2.12943	2.23103	2.33965	2.4054	2.40917	2.36879	2.30413	2.24367	2.21115	2.20227	2.20173
-0.211233	-0.0317179	0.149842	0.33596	0.513522	0.671447	0.821059	0.943263	1.02867	1.06067	1.02324	0.912765	0.754716	0.582405	0.432941	0.319643	0.226158	0.138683	0.0462358	-0.0619883	-0.173052	-0.250819	-0.235955	-0.096409	0.195567	0.587092	0.988825	1.33379	1.58472	1.76945	1.9299	2.07507	2.19396	2.27788	2.30087	2.29493	2.29453	2.34043	2.41581	2.47398	2.48684	2.4483	2.37505	2.29513	2.2502	2.2426	2.26261	2.28851	2.31048	2.33875
1.51854	1.56012	1.60077	1.64738	1.68128	1.71149	1.74165	1.76816	1.79978	1.83469	1.85601	1.86391	1.85889	1.83931	1.819	1.80182	1.79073	1.78269	1.77211	1.7533	1.72725	1.69887	1.67717	1.66572	1.6632	1.66622	1.67053	1.66244	1.6335	1.58359	1.50981	1.41493	1.31438	1.21546	1.10552	0.992531	0.879624	0.773858	0.676215	0.586286	0.507249	0.442429	0.392554	0.352234	0.313776	0.254444	0.196691	0.119213	0.0271379	-0.0826318
0.284765	0.281341	0.243399	0.152285	0.00443909	-0.185214	-0.387971	-0.582054	-0.760763	-0.922469	-1.0606	-1.17316	-1.25853	-1.321	-1.36278	-1.38388	-1.38434	-1.35803	-1.30831	-1.23075	-1.13402	-1.02613	-0.92523	-0.843617	-0.787178	-0.757069	-0.732599	-0.702952	-0.642328	-0.547276	-0.422144	-0.301361	-0.213539	-0.187835	-0.226397	-0.312526	-0.422364	-0.529335	-0.619821	-0.696207	-0.748472	-0.77724	-0.787753	-0.782074	-0.774296	-0.774452	-0.786216	-0.795822	-0.796312	-0.777611
-0.173739	-0.182986	-0.191817	-0.214533	-0.241188	-0.262509	-0.272149	-0.272496	-0.263342	-0.258095	-0.262598	-0.286704	-0.3205	-0.361777	-0.401662	-0.430704	-0.451676	-0.470918	-0.48914	-0.495196	-0.491871	-0.466021	-0.408913	-0.313664	-0.184813	-0.0562405	0.0299533	0.0502911	0.00138145	-0.085491	-0.184648	-0.256851	-0.298795	-0.311298	-0.307639	-0.30087	-0.301091	-0.311687	-0.337414	-0.365615	-0.390442	-0.413872	-0.423411	-0.415005	-0.385462	-0.340285	-0.290203	-0.236048	-0.1809	-0.136698
-0.727088	-0.552223	-0.333114	-0.0926521	0.119724	0.266619	0.345366	0.375762	0.381543	0.362715	0.327138	0.307049	0.313724	0.373366	0.482301	0.611769	0.725212	0.80313	0.833644	0.836326	0.825932	0.81838	0.807807	0.781034	0.724932	0.657373	0.624426	0.704309	0.952382	1.35902	1.83468	2.25065	2.51285	2.62295	2.61305	2.54767	2.44807	2.32839	2.19316	2.04778	1.92743	1.85429	1.83899	1.85157	1.87582	1.89386	1.91901	1.94957	2.00838	2.07211
1.20721	1.11437	1.01213	0.903821	0.790625	0.673635	0.54862	0.416791	0.272727	0.11923	-0.0423653	-0.208664	-0.3632	-0.49423	-0.607848	-0.704038	-0.781143	-0.843242	-0.869372	-0.859126	-0.806052	-0.717325	-0.627558	-0.543344	-0.473974	-0.421762	-0.380203	-0.324031	-0.249677	-0.145789	-0.0225868	0.103896	0.241534	0.359066	0.453421	0.502153	0.518973	0.517252	0.507701	0.48318	0.459163	0.443485	0.446612	0.489004	0.5744	0.686186	0.794693	0.888334	0.934286	0.956718
-2.76444	-2.71043	-2.62706	-2.51021	-2.38813	-2.30335	-2.26826	-2.25685	-2.23023	-2.16087	-2.04677	-1.92047	-1.78152	-1.64186	-1.49525	-1.32961	-1.16002	-0.986725	-0.821591	-0.647322	-0.482778	-0.344768	-0.265294	-0.251248	-0.304737	-0.394844	-0.47824	-0.529588	-0.530635	-0.498875	-0.422083	-0.317395	-0.1633	0.0140055	0.190976	0.340476	0.451625	0.535258	0.57043	0.579831	0.570309	0.545385	0.48823	0.419131	0.355707	0.302328	0.269519	0.269283	0.313212	0.390105
-0.523248	-0.549189	-0.581231	-0.612787	-0.652404	-0.701686	-0.776262	-0.899745	-1.0667	-1.26073	-1.45176	-1.60136	-1.6532	-1.56971	-1.36477	-1.11332	-0.891975	-0.753997	-0.713471	-0.740949	-0.801773	-0.872996	-0.943473	-1.02267	-1.09998	-1.16354	-1.18041	-1.13774	-1.03176	-0.876303	-0.685791	-0.486363	-0.287108	-0.103037	0.0355408	0.130398	0.187475	0.212876	0.205218	0.171701	0.129803	0.0948026	0.0826361	0.0880172	0.115491	0.150185	0.182806	0.210321	0.222214	0.228072
0.663401	0.658684	0.63009	0.58313	0.511189	0.432076	0.346237	0.261217	0.165956	0.0914366	0.0742081	0.133355	0.273476	0.463927	0.682785	0.909723	1.09882	1.20381	1.20231	1.11184	0.969403	0.825844	0.709019	0.655267	0.676086	0.766463	0.874951	0.918894	0.864507	0.720344	0.529302	0.364646	0.243255	0.181264	0.184606	0.222142	0.281518	0.346954	0.424656	0.517279	0.633731	0.770217	0.922196	1.07751	1.19268	1.24766	1.23784	1.18077	1.11257	1.05603
0.0265083	-0.0135195	-0.0561645	-0.0863664	-0.104208	-0.0995568	-0.0906547	-0.0878309	-0.0962698	-0.108492	-0.118941	-0.11275	-0.0860392	-0.0251668	0.0757001	0.211125	0.371614	0.518387	0.6077	0.621684	0.567588	0.470945	0.349564	0.228935	0.114128	0.00184377	-0.101612	-0.177852	-0.216277	-0.204972	-0.141935	-0.0494611	0.0478622	0.129469	0.186118	0.215874	0.223888	0.221772	0.219062	0.224097	0.238283	0.263714	0.30323	0.35171	0.396709	0.433604	0.459448	0.476147	0.495145	0.516271
0.191787	0.258037	0.314984	0.329672	0.274106	0.0880525	-0.169561	-0.376626	-0.470058	-0.492152	-0.530266	-0.603577	-0.731873	-0.903291	-1.09525	-1.26651	-1.39719	-1.46784	-1.49217	-1.49093	-1.46644	-1.38944	-1.23008	-1.02755	-0.84656	-0.735078	-0.702635	-0.701708	-0.692664	-0.675799	-0.664659	-0.719253	-0.897121	-1.17901	-1.48684	-1.7195	-1.821	-1.84049	-1.8077	-1.76913	-1.74495	-1.76326	-1.79619	-1.84994	-1.95964	-2.09805	-2.23564	-2.29639	-2.28266	-2.22599
0.169531	0.210478	0.243744	0.234186	0.162965	-0.137763	-0.671889	-1.42395	-2.22925	-2.90801	-3.36281	-3.49017	-3.28712	-2.86902	-2.34884	-1.85895	-1.42984	-1.10674	-0.914531	-0.91004	-1.11916	-1.48228	-1.73333	-1.71432	-1.45283	-1.15273	-0.96219	-0.899677	-0.928682	-0.927553	-0.885055	-0.81353	-0.701771	-0.515709	-0.294045	-0.0723377	0.0652063	0.0845028	0.0293212	-0.0310085	0.0352232	0.358677	0.720361	0.95471	1.05866	0.989564	0.70352	0.324848	0.0601073	-0.0126611
-2.62554	-2.53402	-2.44574	-2.32622	-2.1619	-1.93651	-1.64857	-1.31402	-0.995578	-0.76726	-0.65496	-0.629122	-0.5555	-0.324327	0.133341	0.695083	1.16967	1.39856	1.39303	1.2661	1.15731	1.11207	1.12519	1.13005	1.02125	0.797672	0.514997	0.331484	0.359327	0.580907	0.953269	1.40905	1.85462	2.25945	2.53561	2.54961	2.31413	2.0445	1.91117	1.88363	1.89833	1.90536	1.86655	1.79956	1.77146	1.80357	1.90454	2.01764	2.04712	1.96598
-2.33563	-2.47585	-2.62345	-2.766	-2.8932	-2.99003	-3.04423	-3.02837	-2.91088	-2.67244	-2.34061	-1.96485	-1.60683	-1.29501	-1.03095	-0.789419	-0.573923	-0.383933	-0.220134	-0.0920137	0.0119762	0.0941107	0.129185	0.098787	-0.017308	-0.201293	-0.405591	-0.572251	-0.640887	-0.57764	-0.390185	-0.132893	0.10349	0.214793	0.186392	0.0886555	0.0214202	0.0324344	0.0756022	0.108606	0.120039	0.144233	0.21582	0.333373	0.476818	0.614667	0.690238	0.693244	0.656071	0.621003
0.383766	0.376727	0.350888	0.31453	0.262073	0.223273	0.213357	0.23486	0.266243	0.298228	0.307688	0.286889	0.249671	0.221567	0.203896	0.207743	0.232675	0.269046	0.311863	0.337039	0.319654	0.251625	0.150875	0.0352267	-0.0445141	-0.0681884	0.00440476	0.199112	0.458922	0.733216	0.946434	1.07049	1.12849	1.17208	1.21379	1.24841	1.25744	1.25384	1.25557	1.25058	1.25384	1.2719	1.3001	1.3258	1.31975	1.28452	1.22097	1.14623	1.06414	0.988182
1.59419	1.59712	1.61289	1.63893	1.69261	1.75987	1.84261	1.92705	1.99756	2.05237	2.09587	2.12432	2.13148	2.14949	2.17902	2.21613	2.2534	2.2786	2.28959	2.29296	2.31528	2.35643	2.38808	2.41693	2.44044	2.45885	2.47085	2.44702	2.33715	2.09262	1.73791	1.31148	0.902676	0.558368	0.258368	-0.0450334	-0.373197	-0.660252	-0.870383	-1.00598	-1.10352	-1.15153	-1.1179	-1.03509	-0.919302	-0.793966	-0.687858	-0.633919	-0.587644	-0.489884
0.858526	0.867144	0.885672	0.928685	0.997514	1.08852	1.19288	1.28488	1.34819	1.35579	1.2879	1.1216	0.828543	0.42687	-0.0121692	-0.396771	-0.644444	-0.75741	-0.794477	-0.832063	-0.921369	-1.06362	-1.22986	-1.38188	-1.45289	-1.4251	-1.29905	-1.10501	-0.879708	-0.68236	-0.561979	-0.544516	-0.59184	-0.653016	-0.709927	-0.737916	-0.757653	-0.786861	-0.83038	-0.86138	-0.824238	-0.698652	-0.497352	-0.257283	-0.0208193	0.17745	0.342194	0.4809	0.613608	0.741413
1.00013	1.01797	1.0301	1.03859	1.04089	1.02211	0.972731	0.898002	0.828587	0.747986	0.628593	0.446009	0.217074	-0.0227441	-0.233864	-0.387889	-0.492135	-0.54942	-0.570278	-0.571658	-0.56338	-0.569036	-0.594769	-0.644728	-0.708242	-0.770606	-0.815385	-0.844314	-0.848925	-0.834948	-0.809416	-0.773882	-0.72718	-0.665212	-0.565726	-0.402056	-0.162623	0.17113	0.592601	1.04857	1.44466	1.73144	1.90116	1.97703	1.99883	1.98812	1.96991	1.93954	1.89939	1.84807
-0.598934	-0.484601	-0.352803	-0.199327	-0.0370847	0.124264	0.256591	0.32621	0.317971	0.249716	0.145801	0.0721299	0.062221	0.104021	0.165797	0.200982	0.208445	0.194827	0.176807	0.159689	0.136995	0.0949365	0.0323095	-0.0399235	-0.124367	-0.230195	-0.364559	-0.50898	-0.643617	-0.744428	-0.790548	-0.785302	-0.725945	-0.631118	-0.530136	-0.446275	-0.403456	-0.404238	-0.43674	-0.467296	-0.4744	-0.457216	-0.438628	-0.437394	-0.465748	-0.52347	-0.608613	-0.710168	-0.817581	-0.923139
-0.352962	-0.392509	-0.430826	-0.453753	-0.468932	-0.490727	-0.529043	-0.582578	-0.62679	-0.652467	-0.658022	-0.653345	-0.645942	-0.648429	-0.662109	-0.690894	-0.730549	-0.762408	-0.781384	-0.789585	-0.795112	-0.797098	-0.786629	-0.796666	-0.881602	-1.08929	-1.44133	-1.90154	-2.38149	-2.76896	-3.03232	-3.20104	-3.31111	-3.37539	-3.37626	-3.24882	-2.98525	-2.56612	-2.03812	-1.48684	-0.990722	-0.623926	-0.4023	-0.294891	-0.265033	-0.274257	-0.300741	-0.320442	-0.333149	-0.342506
0.625036	0.615016	0.588218	0.538249	0.470924	0.418003	0.437663	0.472284	0.52006	0.497823	0.417037	0.276945	0.109795	-0.0892681	-0.264315	-0.49276	-0.754736	-1.04436	-1.31953	-1.55518	-1.71144	-1.75638	-1.72778	-1.65692	-1.57651	-1.5575	-1.58742	-1.64746	-1.69414	-1.70077	-1.67012	-1.59582	-1.42187	-1.16246	-0.785828	-0.302374	0.184614	0.645193	1.07911	1.42131	1.68561	1.88704	2.04118	2.19762	2.3648	2.54013	2.69606	2.85876	2.98675	3.12938
1.93604	1.93538	1.92991	1.92777	1.94288	1.96176	1.97466	1.96294	1.90574	1.80231	1.68092	1.5505	1.4553	1.38441	1.37004	1.44957	1.60361	1.77244	1.89958	1.96809	1.98914	1.99403	2.00721	2.04621	2.14776	2.31596	2.55539	2.81125	3.00616	3.05961	2.92517	2.60663	2.16869	1.7305	1.36233	1.10882	0.941457	0.833785	0.757334	0.718227	0.770433	0.94822	1.27307	1.68027	2.09096	2.42302	2.64912	2.79816	2.89172	2.92428
1.52106	1.51928	1.50315	1.47084	1.42942	1.39101	1.37078	1.37597	1.40288	1.42643	1.43352	1.41942	1.39653	1.37597	1.36488	1.36937	1.38407	1.39614	1.40518	1.40778	1.41883	1.43583	1.45291	1.45045	1.41436	1.34054	1.21693	1.05249	0.85661	0.648502	0.441586	0.264687	0.110634	-0.0201907	-0.128534	-0.203738	-0.234295	-0.230552	-0.1707	-0.0559171	0.120238	0.336572	0.581913	0.826643	1.05431	1.26638	1.47154	1.66577	1.83239	1.95431
0.485303	0.209231	-0.0998292	-0.434657	-0.736371	-0.963858	-1.10672	-1.14498	-1.10563	-1.01504	-0.932523	-0.870297	-0.834372	-0.827237	-0.827251	-0.82964	-0.808612	-0.778031	-0.747881	-0.72627	-0.726907	-0.740023	-0.74892	-0.746285	-0.744355	-0.729394	-0.716404	-0.69981	-0.695698	-0.709786	-0.761413	-0.85209	-0.973096	-1.11253	-1.26923	-1.44541	-1.66364	-1.89826	-2.09646	-2.19114	-2.11664	-1.8959	-1.59865	-1.28607	-1.01441	-0.796876	-0.638983	-0.535717	-0.470651	-0.443121
0.422744	0.305714	0.157601	0.00933722	-0.163211	-0.360077	-0.581915	-0.797235	-0.953598	-1.03394	-1.07668	-1.13925	-1.26232	-1.44457	-1.64833	-1.83985	-2.00185	-2.12755	-2.23139	-2.32023	-2.39837	-2.44486	-2.44982	-2.40247	-2.28256	-2.10847	-1.87207	-1.60703	-1.34014	-1.13163	-0.983249	-0.859577	-0.729404	-0.54083	-0.31042	-0.0415996	0.229918	0.474099	0.65789	0.758716	0.801768	0.809578	0.81682	0.835341	0.864241	0.870282	0.848193	0.780075	0.680203	0.572318
0.691723	0.662214	0.632525	0.610664	0.603282	0.60655	0.620782	0.617948	0.60131	0.565555	0.526442	0.489641	0.466747	0.43193	0.390931	0.337522	0.290063	0.265478	0.248844	0.236864	0.221858	0.199464	0.171559	0.162403	0.185187	0.214663	0.228674	0.223425	0.220361	0.231805	0.269517	0.33237	0.395395	0.449616	0.504803	0.577301	0.672319	0.793736	0.905162	0.997022	1.04894	1.08283	1.07637	1.03942	0.974661	0.921258	0.887354	0.8554	0.77559	0.610939
-1.07632	-1.02832	-0.983044	-0.94052	-0.893192	-0.839877	-0.780486	-0.730275	-0.720415	-0.742889	-0.780758	-0.819144	-0.861295	-0.89153	-0.901795	-0.901522	-0.900204	-0.905829	-0.918357	-0.926674	-0.934886	-0.940651	-0.956077	-1.00159	-1.0897	-1.22213	-1.37237	-1.50422	-1.58214	-1.57442	-1.50323	-1.38266	-1.24743	-1.16369	-1.17447	-1.25096	-1.31911	-1.31481	-1.20666	-1.02815	-0.828707	-0.644468	-0.483369	-0.347664	-0.251941	-0.194033	-0.160084	-0.102839	-0.0119005	0.143283
-3.29	-3.3392	-3.40812	-3.49485	-3.57594	-3.62355	-3.61896	-3.53273	-3.36371	-3.11779	-2.84329	-2.5994	-2.4405	-2.37822	-2.38912	-2.42721	-2.43914	-2.41204	-2.34034	-2.24488	-2.13785	-2.04539	-1.99367	-1.98603	-2.00564	-2.03189	-2.041	-2.00842	-1.92374	-1.76566	-1.54055	-1.25693	-0.964441	-0.735584	-0.622315	-0.656227	-0.826545	-1.0559	-1.24965	-1.34679	-1.33031	-1.22261	-1.07248	-0.917365	-0.786944	-0.680501	-0.601826	-0.546	-0.495618	-0.4452
-0.106826	-0.09185	-0.0721362	-0.0501824	-0.0401805	-0.022366	0.00555532	0.041588	0.0657254	0.0797393	0.0900788	0.100647	0.118114	0.146258	0.168164	0.184049	0.181707	0.182057	0.182017	0.186349	0.2066	0.23807	0.261849	0.276906	0.277801	0.263813	0.255613	0.242006	0.231273	0.231845	0.238976	0.264674	0.313431	0.381746	0.478494	0.571375	0.655144	0.727084	0.784081	0.829038	0.871302	0.907109	0.948702	1.00867	1.08318	1.16612	1.23882	1.29376	1.31238	1.30448
0.282528	0.233751	0.136859	-0.0215852	-0.227922	-0.448209	-0.640346	-0.782731	-0.867607	-0.909815	-0.92583	-0.928548	-0.922765	-0.906413	-0.878194	-0.846001	-0.816442	-0.777756	-0.725444	-0.65828	-0.587627	-0.521431	-0.471009	-0.448203	-0.446606	-0.454327	-0.475781	-0.50875	-0.543112	-0.565779	-0.561424	-0.521036	-0.444062	-0.346445	-0.251001	-0.173056	-0.119568	-0.0747371	-0.0401132	-0.0142984	-0.008783	-0.0279409	-0.0689978	-0.118226	-0.147593	-0.134614	-0.0745767	0.0194781	0.137655	0.259423
-0.904209	-0.847183	-0.759741	-0.632132	-0.469811	-0.286391	-0.0967906	0.091556	0.294507	0.513781	0.753272	0.996032	1.21537	1.39615	1.51229	1.53132	1.45773	1.31001	1.12983	0.987101	0.931029	0.980097	1.10055	1.21289	1.28669	1.28642	1.20448	1.0854	0.972033	0.892243	0.893303	0.967414	1.08811	1.21437	1.30183	1.34594	1.35943	1.34079	1.28741	1.21502	1.14567	1.0948	1.0727	1.07027	1.09723	1.15368	1.2368	1.33848	1.44268	1.51995
1.16417	1.12828	1.07591	1.00544	0.945638	0.915339	0.91461	0.928844	0.912992	0.848299	0.715833	0.549654	0.392451	0.289668	0.243757	0.25997	0.277395	0.224714	0.0738551	-0.12855	-0.315269	-0.455587	-0.543043	-0.61086	-0.67536	-0.751963	-0.814785	-0.832267	-0.793507	-0.731882	-0.684423	-0.655851	-0.625588	-0.595092	-0.547604	-0.481604	-0.432998	-0.41109	-0.422469	-0.454814	-0.50051	-0.547795	-0.554554	-0.515136	-0.457071	-0.397258	-0.361605	-0.343196	-0.345872	-0.358175
-0.920349	-1.03591	-1.1636	-1.27201	-1.34649	-1.39087	-1.3895	-1.3165	-1.1341	-0.856897	-0.533914	-0.262556	-0.12851	-0.128474	-0.223539	-0.312463	-0.352775	-0.309821	-0.205041	-0.0572241	0.0769587	0.129746	0.0414326	-0.198852	-0.54037	-0.903223	-1.19423	-1.32883	-1.25704	-1.06905	-0.868334	-0.74163	-0.70507	-0.752637	-0.841894	-0.937775	-1.01273	-1.06139	-1.09453	-1.11178	-1.13844	-1.17397	-1.20498	-1.22968	-1.24745	-1.25743	-1.24658	-1.22444	-1.21436	-1.22373
-2.29963	-2.37579	-2.4939	-2.68824	-2.88731	-3.06559	-3.17157	-3.20082	-3.19486	-3.16565	-3.11996	-3.07068	-3.04099	-3.04342	-3.09766	-3.17278	-3.24872	-3.32002	-3.37812	-3.40537	-3.41615	-3.42535	-3.44729	-3.45778	-3.45577	-3.45583	-3.475	-3.50545	-3.50782	-3.48393	-3.41051	-3.33311	-3.25034	-3.16812	-3.03503	-2.8512	-2.62203	-2.42299	-2.29974	-2.27901	-2.37354	-2.52852	-2.68334	-2.78103	-2.77971	-2.66917	-2.53558	-2.41272	-2.36725	-2.37585
-2.21778	-2.24771	-2.27865	-2.29167	-2.26977	-2.21999	-2.17734	-2.16705	-2.16999	-2.18811	-2.20039	-2.20046	-2.20152	-2.19879	-2.19789	-2.18629	-2.17508	-2.16057	-2.16595	-2.17623	-2.20627	-2.24385	-2.28356	-2.32001	-2.34387	-2.35276	-2.35429	-2.34173	-2.33323	-2.31969	-2.30402	-2.26301	-2.20028	-2.10111	-1.9904	-1.87799	-1.77715	-1.71546	-1.67947	-1.68616	-1.72351	-1.79946	-1.88339	-1.96076	-2.01643	-2.06055	-2.09221	-2.12959	-2.16647	-2.18923
-0.955702	-1.28114	-1.64482	-2.005	-2.27859	-2.36358	-2.24692	-1.99401	-1.66034	-1.31608	-1.00122	-0.774954	-0.648788	-0.629225	-0.770375	-1.0696	-1.50625	-1.92027	-2.11359	-2.00387	-1.6436	-1.17004	-0.718234	-0.342661	-0.102606	-0.0245917	-0.11563	-0.36515	-0.720349	-1.02351	-1.21743	-1.26171	-1.13806	-0.908318	-0.645483	-0.387716	-0.148722	0.0920186	0.31057	0.460215	0.498999	0.41497	0.2627	0.107517	-0.036592	-0.197157	-0.331198	-0.445113	-0.542069	-0.61158
0.264217	0.208918	0.088908	-0.106883	-0.339379	-0.548944	-0.695605	-0.75878	-0.752031	-0.720594	-0.695626	-0.684329	-0.665732	-0.646099	-0.630759	-0.566842	-0.432994	-0.227295	-0.0105222	0.141665	0.152435	0.0166948	-0.225825	-0.509724	-0.765692	-0.966934	-1.10986	-1.23412	-1.35418	-1.5	-1.6213	-1.68346	-1.62348	-1.42278	-1.09387	-0.681974	-0.249114	0.130447	0.435518	0.653468	0.803919	0.899365	0.944697	0.933231	0.886108	0.837069	0.807658	0.793437	0.770774	0.740935
0.989987	0.935726	0.900216	0.878999	0.872872	0.859264	0.837129	0.803446	0.774752	0.758949	0.754673	0.741801	0.709712	0.652612	0.582289	0.525138	0.505618	0.531918	0.593138	0.648506	0.679588	0.679761	0.657237	0.625588	0.615627	0.606633	0.589768	0.542844	0.483648	0.412287	0.307366	0.155227	-0.0444919	-0.274821	-0.522829	-0.727635	-0.88553	-0.993901	-1.06597	-1.09735	-1.09361	-1.08428	-1.06653	-1.05696	-1.02812	-0.970878	-0.893345	-0.834069	-0.81404	-0.826715
1.49584	1.51339	1.53418	1.55031	1.56249	1.56099	1.54911	1.53475	1.52652	1.5366	1.56359	1.59809	1.62489	1.63291	1.61804	1.58474	1.53476	1.48095	1.42149	1.35013	1.28286	1.22439	1.19167	1.16901	1.15384	1.13292	1.10225	1.05556	0.996687	0.940137	0.895147	0.865139	0.837192	0.810732	0.788226	0.769898	0.769166	0.793501	0.846525	0.917483	0.978704	1.00658	1.00186	0.974841	0.942582	0.938985	0.979408	1.08115	1.22895	1.39401
2.44498	2.3938	2.27805	2.00169	1.56016	0.978462	0.369726	-0.133249	-0.436638	-0.514833	-0.405475	-0.210212	0.0522444	0.37948	0.727232	1.06174	1.29054	1.33144	1.15402	0.788546	0.345323	-0.0519507	-0.322124	-0.483163	-0.571704	-0.618216	-0.635548	-0.620795	-0.571808	-0.502269	-0.442751	-0.416979	-0.430581	-0.486913	-0.58783	-0.711525	-0.823494	-0.894714	-0.905876	-0.834765	-0.644676	-0.322531	0.106196	0.609153	1.10808	1.54382	1.88801	2.11917	2.24096	2.2832
1.335	1.32298	1.33699	1.36252	1.41752	1.47926	1.5517	1.62351	1.71519	1.82918	1.94154	2.02506	2.04046	1.97937	1.81777	1.55618	1.1948	0.777635	0.329922	-0.108697	-0.524722	-0.904487	-1.22365	-1.46148	-1.59877	-1.6482	-1.64083	-1.59665	-1.50739	-1.36041	-1.13071	-0.828523	-0.496694	-0.187933	0.0790775	0.327005	0.599928	0.9174	1.25658	1.55417	1.76281	1.87053	1.91036	1.93141	1.95941	1.99713	2.0432	2.07435	2.08638	2.08773
0.340504	0.332358	0.249208	0.0920357	-0.0752534	-0.149906	-0.10624	-0.0457807	-0.0289247	-0.103205	-0.207545	-0.225374	-0.166523	-0.0948346	-0.0420544	0.0297315	0.10098	0.196447	0.292113	0.337526	0.333612	0.225935	0.105939	-0.0294116	-0.14522	-0.262974	-0.33563	-0.382489	-0.394056	-0.427772	-0.477485	-0.519124	-0.513832	-0.47126	-0.416899	-0.358039	-0.261794	-0.151702	-0.0758997	-0.0492566	-0.116027	-0.278115	-0.424959	-0.433833	-0.325144	-0.170068	-0.0426452	0.00033828	-0.0260453	-0.0818776
-0.0562375	0.0414414	0.130604	0.221334	0.336069	0.460442	0.598843	0.722944	0.772347	0.70115	0.556036	0.42096	0.317126	0.243787	0.131296	0.0406711	-0.0397313	-0.143044	-0.208664	-0.193461	-0.167379	-0.154769	-0.150148	-0.116208	-0.0235542	0.0927057	0.210916	0.318064	0.35098	0.260229	0.0127822	-0.293898	-0.49369	-0.561236	-0.444723	-0.234282	-0.0031589	0.10358	0.120548	0.0501087	0.0464384	0.110516	0.198408	0.310848	0.341884	0.269323	0.175944	0.168417	0.263703	0.451329
0.415955	0.382847	0.329536	0.263337	0.18439	0.0963348	-0.0301057	-0.228295	-0.427519	-0.548402	-0.535104	-0.399777	-0.176897	0.0536777	0.212482	0.323701	0.374853	0.388704	0.460357	0.546677	0.62239	0.59991	0.461368	0.211179	-0.0124948	-0.172162	-0.220531	-0.213871	-0.181656	-0.121735	-0.0479758	0.0201405	0.0740769	0.141165	0.229162	0.306376	0.31755	0.291663	0.251043	0.241923	0.265931	0.239052	0.136347	0.000941105	-0.0863382	-0.123284	-0.135792	-0.136466	-0.168381	-0.18687
-0.0842959	0.0720234	0.151612	0.117412	-0.0111765	-0.18878	-0.326598	-0.414021	-0.46634	-0.517477	-0.588963	-0.701878	-0.813004	-0.879475	-0.794925	-0.548557	-0.263895	-0.0689015	-0.0358367	-0.12404	-0.224381	-0.264459	-0.244485	-0.166592	-0.0793985	-0.0429701	-0.0368632	-0.0573313	-0.0367735	0.079076	0.29226	0.448159	0.446304	0.25251	-0.0458962	-0.361772	-0.55439	-0.579813	-0.497711	-0.404567	-0.361586	-0.345192	-0.306125	-0.195785	-0.0404498	0.0707097	0.0846001	-0.085209	-0.367267	-0.648738
-1.31493	-1.19216	-1.09291	-0.96271	-0.818039	-0.695471	-0.606393	-0.525098	-0.458875	-0.354298	-0.211967	-0.0132353	0.233547	0.415986	0.446312	0.338642	0.235227	0.187563	0.236008	0.31536	0.387794	0.408727	0.3663	0.311517	0.23272	0.120817	-0.0534679	-0.276449	-0.453151	-0.553165	-0.610638	-0.631988	-0.685452	-0.709779	-0.627191	-0.445897	-0.275577	-0.197572	-0.239757	-0.394872	-0.527794	-0.570437	-0.486069	-0.339853	-0.237243	-0.234945	-0.325689	-0.508066	-0.706319	-0.790867
-0.793534	-0.93478	-1.06984	-1.09178	-0.962713	-0.735834	-0.498386	-0.319376	-0.204133	-0.174353	-0.249526	-0.408584	-0.508096	-0.4937	-0.396919	-0.270168	-0.121489	-0.0721944	-0.117553	-0.170639	-0.207683	-0.149634	-0.0414375	0.115014	0.309821	0.489899	0.656586	0.81	0.916884	0.897414	0.68106	0.333287	0.0225493	-0.110629	-0.0663434	0.0640516	0.144646	0.189471	0.186114	0.130824	0.0522913	-0.0273458	-0.0856712	-0.0986652	-0.0905602	-0.0717398	-0.0205721	0.0580293	0.146509	0.175235
-0.510203	-0.531382	-0.556711	-0.547483	-0.514456	-0.510338	-0.537176	-0.594094	-0.614481	-0.576412	-0.500629	-0.435125	-0.46939	-0.687127	-0.945949	-1.13658	-1.22196	-1.16051	-0.997219	-0.721341	-0.44271	-0.238684	-0.160876	-0.201375	-0.300967	-0.39229	-0.385373	-0.296704	-0.187194	-0.0563584	0.128718	0.28181	0.349866	0.394472	0.481584	0.63388	0.807457	0.935231	0.9841	0.889791	0.650389	0.306832	0.035204	-0.077028	0.0333855	0.299359	0.606566	0.813576	0.865814	0.787458
0.777	0.651079	0.485399	0.22885	-0.0244015	-0.263086	-0.413619	-0.404119	-0.250348	-0.0407013	0.115005	0.1753	0.168978	0.147256	0.222991	0.380451	0.541953	0.759647	0.861172	0.838927	0.723002	0.542586	0.339933	0.22016	0.176033	0.163227	0.179605	0.0927962	-0.0724221	-0.251372	-0.321984	-0.347318	-0.303581	-0.196072	-0.0648653	0.116519	0.277386	0.33225	0.259888	0.0741475	-0.147205	-0.29166	-0.372307	-0.421892	-0.461594	-0.523043	-0.530006	-0.446307	-0.27439	-0.0206489
-0.241197	-0.173368	-0.0786415	0.0496906	0.177242	0.24488	0.236111	0.134819	-0.0375513	-0.217616	-0.356844	-0.444926	-0.382187	-0.192839	0.0622537	0.279551	0.381039	0.384944	0.356657	0.289279	0.254233	0.215405	0.129785	0.0896985	0.112192	0.146189	0.162795	0.131211	0.0665103	0.0259709	-0.0157258	-0.022551	-0.0160753	-0.0398923	-0.095216	-0.196631	-0.274531	-0.310202	-0.227076	-0.0120565	0.194738	0.302312	0.263691	0.107418	-0.0450218	-0.143934	-0.207121	-0.258852	-0.237634	-0.138407
-0.927343	-0.808799	-0.659885	-0.533243	-0.415525	-0.35624	-0.266448	-0.223148	-0.195936	-0.178235	-0.196314	-0.240514	-0.22366	-0.0885735	0.0948169	0.300831	0.382571	0.380793	0.31378	0.278557	0.319308	0.401407	0.490329	0.505376	0.470508	0.389641	0.309677	0.272617	0.264131	0.283795	0.32708	0.416533	0.511568	0.512681	0.452308	0.359971	0.309482	0.323899	0.382839	0.499228	0.611073	0.621429	0.568064	0.485915	0.391581	0.2737	0.148446	0.0731504	0.0687766	0.0723016
-0.675503	-0.835575	-0.947885	-0.920799	-0.787968	-0.559461	-0.336744	-0.157607	-0.00753503	0.0686683	0.0612817	0.00258593	-0.0727161	-0.150683	-0.154875	-0.0706414	0.00644153	0.0345719	-0.0144003	-0.053804	-0.0244489	0.122506	0.281574	0.396895	0.360252	0.241826	0.207573	0.272446	0.463747	0.585654	0.586065	0.460561	0.333451	0.280548	0.343479	0.428921	0.431425	0.334759	0.139913	-0.0256324	-0.106241	-0.133475	-0.144246	-0.232771	-0.396021	-0.599275	-0.729543	-0.74545	-0.683988	-0.616726
-0.953643	-0.887367	-0.838108	-0.828178	-0.817434	-0.734959	-0.551857	-0.295825	-0.0934093	0.0471521	0.121664	0.146896	0.0685187	-0.0840269	-0.299552	-0.522284	-0.721727	-0.842793	-0.847973	-0.733455	-0.543847	-0.354941	-0.20725	-0.0946233	-0.078233	-0.0973517	-0.096616	-0.0013279	0.156385	0.325661	0.455266	0.549249	0.575306	0.582718	0.53931	0.429412	0.214229	-0.0876577	-0.39612	-0.641522	-0.704059	-0.613788	-0.413047	-0.21585	-0.102924	-0.109675	-0.167305	-0.249758	-0.261317	-0.267157
-0.663529	-0.788306	-0.813518	-0.741117	-0.555589	-0.352187	-0.240793	-0.217323	-0.310724	-0.417027	-0.516815	-0.545827	-0.414464	-0.148333	0.19545	0.520833	0.769766	0.814797	0.726429	0.590718	0.523787	0.535203	0.587783	0.760039	0.928652	1.01207	0.988451	0.793533	0.462979	0.096806	-0.188713	-0.263201	-0.180087	-0.0410367	0.0582732	0.113295	0.0818411	0.022344	0.0173759	0.0264084	0.0684342	0.149986	0.260187	0.376382	0.477847	0.584952	0.701148	0.75929	0.726599	0.626341
-0.0943289	0.224955	0.411854	0.489857	0.396717	0.179452	-0.0806834	-0.292903	-0.390206	-0.348406	-0.284073	-0.229249	-0.199983	-0.190529	-0.17728	-0.144251	-0.164673	-0.256169	-0.385232	-0.53827	-0.543969	-0.45082	-0.279795	-0.0540838	0.129749	0.262617	0.326125	0.351999	0.345893	0.292216	0.211701	0.122398	-0.0138164	-0.24558	-0.46458	-0.657819	-0.746781	-0.771458	-0.727252	-0.666699	-0.567395	-0.452921	-0.254488	-0.0317122	0.118748	0.197609	0.196746	0.223994	0.326831	0.514542
0.0911714	0.0951577	0.0239295	-0.0420177	-0.121934	-0.154831	-0.162743	-0.0990584	0.0355876	0.185997	0.221989	0.132265	-0.0479854	-0.272562	-0.375392	-0.335816	-0.0909305	0.23732	0.545267	0.761912	0.75648	0.570003	0.297206	0.0464273	-0.03409	0.00698054	0.148246	0.287329	0.399758	0.433743	0.397785	0.334776	0.289363	0.4336	0.721032	1.06126	1.22911	1.16133	0.847787	0.435905	0.0270045	-0.268792	-0.432874	-0.500892	-0.438135	-0.308154	-0.202109	-0.176621	-0.170803	-0.145359
-0.220139	-0.244814	-0.136945	0.0110626	0.197418	0.28973	0.228186	0.139453	-0.0396475	-0.236784	-0.487162	-0.690983	-0.85846	-0.997831	-1.05235	-0.957316	-0.713218	-0.35394	-0.0226643	0.169691	0.270869	0.27167	0.20314	0.12259	0.0680624	0.0576303	0.109584	0.169938	0.224364	0.333688	0.409546	0.436805	0.340783	0.170117	0.016827	-0.0843979	-0.204596	-0.298526	-0.338521	-0.256548	-0.0354947	0.256061	0.563088	0.689278	0.616582	0.411301	0.239011	0.110454	0.00635974	-0.045931
0.56344	0.449859	0.239066	0.0644437	-0.0880999	-0.15897	-0.182682	-0.20554	-0.218584	-0.248943	-0.236515	-0.123086	0.102603	0.324324	0.48271	0.44944	0.277605	0.0970016	0.0255773	0.0832629	0.188896	0.273487	0.293539	0.194484	0.0425753	-0.12138	-0.238092	-0.27329	-0.219427	-0.115371	-0.0956764	-0.153999	-0.263634	-0.313709	-0.326066	-0.208627	-0.042138	0.142261	0.26521	0.359419	0.367871	0.308054	0.213017	0.156315	0.177794	0.27801	0.438092	0.616966	0.75632	0.842159
-0.0207466	-0.0393583	-0.017316	-0.0744414	-0.190803	-0.291579	-0.341604	-0.236728	-0.0648237	0.139094	0.241611	0.209655	0.112393	0.075279	0.153885	0.362405	0.652488	0.875669	0.955913	0.837083	0.600038	0.333316	0.0642589	-0.119323	-0.240492	-0.242262	-0.15084	-0.058635	-0.00196014	-0.0417958	-0.102298	-0.122352	-0.0760736	-0.034985	-0.00930787	0.0437877	0.166154	0.331707	0.42657	0.510992	0.611112	0.757998	0.876929	0.930235	0.883625	0.684357	0.372337	0.0855234	-0.0632828	-0.0735182
0.81696	0.858812	0.793679	0.667061	0.464823	0.285446	0.21454	0.238389	0.308427	0.280474	0.133263	-0.0403757	-0.165685	-0.170206	-0.0117554	0.233	0.454175	0.587155	0.611052	0.500087	0.289707	0.0399891	-0.155457	-0.294957	-0.308099	-0.244681	-0.161284	-0.0844444	-0.0530035	-0.0565988	0.00428614	0.167014	0.419724	0.697864	0.948759	1.12633	1.09773	0.931406	0.690003	0.521296	0.477497	0.547846	0.599064	0.53704	0.366815	0.168892	0.0830151	0.0768029	0.0939588	0.154557
0.887861	0.69049	0.553304	0.488965	0.468548	0.481509	0.459426	0.40015	0.284696	0.252762	0.334047	0.516918	0.646862	0.650447	0.504574	0.319382	0.136191	0.0451552	0.0676388	0.181321	0.316135	0.410685	0.438191	0.432338	0.450635	0.489453	0.55931	0.612665	0.586728	0.498136	0.406404	0.383569	0.391023	0.394775	0.394212	0.389858	0.36534	0.369988	0.391324	0.407388	0.415611	0.396346	0.414474	0.495063	0.636758	0.762092	0.815532	0.750454	0.604711	0.464729
0.132124	-0.0471037	-0.230896	-0.431398	-0.52575	-0.502042	-0.404371	-0.295608	-0.293433	-0.376528	-0.476783	-0.531318	-0.510949	-0.381978	-0.20789	-0.113217	-0.0976858	-0.178536	-0.251762	-0.250854	-0.158557	-0.0544418	0.0143098	0.00351705	-0.00325036	0.0019182	0.0362202	0.121072	0.180738	0.189286	0.0841689	-0.102278	-0.316274	-0.420442	-0.45214	-0.381858	-0.282032	-0.215288	-0.182401	-0.17295	-0.166659	-0.227087	-0.300797	-0.380517	-0.405722	-0.38729	-0.340532	-0.269168	-0.225787	-0.128483
-0.640769	-0.376183	-0.123368	0.0432973	0.116709	0.0941497	0.0132971	-0.0722188	-0.183166	-0.344857	-0.424771	-0.365154	-0.159866	0.205096	0.605	0.907407	0.992293	0.847029	0.572382	0.33332	0.147469	-0.00455987	-0.147565	-0.271141	-0.309578	-0.289558	-0.215139	-0.122964	-0.0240129	0.0758208	0.186899	0.2855	0.31465	0.272628	0.138121	-0.0652101	-0.360749	-0.634385	-0.838272	-0.897155	-0.86756	-0.772692	-0.657851	-0.509135	-0.358293	-0.176073	-0.02384	0.0634836	0.00354783	-0.181612
0.813251	0.926849	0.958015	0.920398	0.789065	0.623947	0.46612	0.331484	0.246676	0.229111	0.325971	0.501345	0.668037	0.740743	0.657532	0.471337	0.217364	-0.0519354	-0.29879	-0.443651	-0.471143	-0.36671	-0.236896	-0.112177	-0.0154611	0.0321357	0.0721445	0.100754	0.131745	0.131129	0.0591352	-0.0567886	-0.181119	-0.254177	-0.281675	-0.31816	-0.404172	-0.469156	-0.433472	-0.285204	-0.0904799	0.0697609	0.115521	0.0646047	-0.0260052	-0.0566567	0.0441992	0.272156	0.594402	0.841921
-0.391568	-0.432493	-0.374934	-0.168578	0.13164	0.412658	0.566989	0.583881	0.476706	0.352374	0.231201	0.176215	0.144616	0.180261	0.294848	0.489377	0.633682	0.691933	0.628701	0.463861	0.249151	0.124167	0.132629	0.346108	0.647024	0.96094	1.09518	0.989395	0.756311	0.489761	0.270451	0.0884428	0.0271297	0.051027	0.12189	0.132878	0.226808	0.341389	0.455299	0.520484	0.496434	0.37883	0.227844	0.0833624	-0.0183869	0.0920514	0.295755	0.584807	0.859243	1.03331
0.101781	0.3369	0.539412	0.596819	0.441577	0.104642	-0.310085	-0.696276	-0.997345	-1.1685	-1.17313	-1.01917	-0.778005	-0.5535	-0.339819	-0.225329	-0.225336	-0.296134	-0.35729	-0.343526	-0.232963	-0.0759926	0.0931191	0.192516	0.138644	0.00446611	-0.122741	-0.221837	-0.317367	-0.388746	-0.405509	-0.334678	-0.21842	-0.0686752	0.0528691	0.140544	0.130586	0.125157	0.121731	0.0289694	-0.101579	-0.250779	-0.363325	-0.45654	-0.509723	-0.57977	-0.611668	-0.613415	-0.55599	-0.440895
0.234238	0.500853	0.741279	0.955954	1.00393	0.914247	0.800308	0.756035	0.821665	0.999359	1.13154	1.21076	1.12514	0.972779	0.84609	0.754279	0.696201	0.632569	0.604203	0.539886	0.479952	0.418016	0.350639	0.3655	0.43492	0.565591	0.634259	0.652357	0.641798	0.580269	0.556145	0.584992	0.684833	0.798634	0.960369	1.12785	1.26943	1.36411	1.3675	1.31748	1.18909	1.09011	0.983009	1.02012	1.16419	1.35949	1.50462	1.53388	1.50945	1.4558
0.166334	0.29861	0.334463	0.271095	0.126659	-0.00939061	-0.117124	-0.185332	-0.198622	-0.234826	-0.250996	-0.249177	-0.235148	-0.175499	-0.0649283	0.0801141	0.322562	0.641127	0.991278	1.26994	1.35243	1.24557	1.01518	0.779459	0.635016	0.544612	0.51824	0.503591	0.460294	0.418832	0.377199	0.35876	0.406897	0.523856	0.696977	0.859866	0.924353	0.887758	0.804672	0.719894	0.682265	0.616906	0.57154	0.536943	0.538183	0.542446	0.545842	0.509939	0.483744	0.489178
-0.773508	-0.762	-0.728895	-0.674386	-0.593951	-0.49499	-0.378555	-0.334288	-0.427485	-0.598761	-0.744908	-0.850156	-0.903978	-0.950484	-0.89245	-0.752802	-0.517935	-0.250078	-0.0160757	0.073465	0.0261181	-0.0729556	-0.118308	-0.0959531	-0.069977	-0.0233939	0.00965877	0.0584609	0.0526423	0.0455807	0.0162477	-0.059853	-0.162907	-0.301014	-0.442728	-0.566384	-0.694597	-0.801117	-0.809935	-0.760262	-0.725065	-0.702662	-0.70804	-0.704155	-0.667342	-0.602289	-0.575573	-0.517794	-0.436308	-0.269294
-0.595426	-0.591297	-0.581416	-0.519565	-0.472457	-0.35933	-0.211009	-0.0700781	0.00897015	0.0344156	0.0225425	-0.0178086	-0.0284423	-0.0410809	-0.0644382	-0.139862	-0.199192	-0.20778	-0.183246	-0.138826	-0.154348	-0.218652	-0.296349	-0.265361	-0.216473	-0.108462	-0.0270689	-0.0224941	-0.065545	-0.160388	-0.19397	-0.223995	-0.205268	-0.172512	-0.0271326	0.152551	0.370408	0.475008	0.403351	0.217403	-0.0191434	-0.203786	-0.358957	-0.471811	-0.575661	-0.713748	-0.820513	-0.896824	-0.943206	-0.940982
1.24213	1.33348	1.31656	1.19637	0.914425	0.615836	0.409654	0.364933	0.449718	0.532138	0.599592	0.60908	0.582372	0.523944	0.530058	0.552241	0.565683	0.426894	0.187408	-0.0248518	-0.158138	-0.179149	-0.119835	0.0172397	0.0617099	0.0259867	-0.0306934	0.00246321	0.164492	0.310482	0.368858	0.296607	0.197747	0.103243	0.0597416	0.0183903	0.0248964	0.0439749	0.10482	0.111502	0.0540634	-0.0654504	-0.184683	-0.185081	-0.0968986	0.031169	0.138812	0.143214	0.078114	-0.0813771
0.226865	0.176203	0.156756	0.159428	0.219837	0.291045	0.349099	0.357556	0.327475	0.25413	0.0939598	-0.138934	-0.420531	-0.664945	-0.732158	-0.614961	-0.334724	-0.0205154	0.249551	0.429955	0.528944	0.581723	0.62905	0.610849	0.54312	0.443681	0.36848	0.228198	0.0624098	-0.110725	-0.247562	-0.396572	-0.522942	-0.574673	-0.540936	-0.41787	-0.308197	-0.162026	0.0213039	0.272609	0.506143	0.605641	0.523472	0.32181	0.120307	0.0342885	0.0394489	0.0824282	0.0685875	-0.012747
-0.147876	-0.205352	-0.189807	-0.16121	-0.11059	-0.125719	-0.0961644	-0.0192978	0.192048	0.575539	0.97615	1.25114	1.33371	1.18736	0.886827	0.604328	0.383627	0.290777	0.246363	0.194981	0.0540345	-0.068655	-0.192776	-0.144268	0.0109392	0.224472	0.419061	0.547105	0.604179	0.677839	0.745638	0.752152	0.730782	0.637	0.535844	0.459169	0.375825	0.293829	0.245059	0.136233	-0.015228	-0.166082	-0.271163	-0.286406	-0.192903	-0.0918432	-0.0456881	-0.128573	-0.348544	-0.649933
-0.565495	-0.516621	-0.418153	-0.246418	-0.0590315	0.134512	0.255072	0.330958	0.398629	0.482806	0.573946	0.62099	0.60016	0.495355	0.348314	0.240765	0.145574	0.0834383	0.119116	0.282996	0.50529	0.72474	0.815398	0.728664	0.477301	0.2181	0.0288628	-0.0670081	-0.0825691	-0.0223751	0.112618	0.233416	0.350509	0.445408	0.506613	0.460313	0.369896	0.281305	0.210856	0.191095	0.266634	0.348217	0.387597	0.335526	0.24753	0.155576	0.00123958	-0.10646	-0.137414	-0.0339917
-0.0446661	-0.0576604	-0.0932548	-0.0975296	-0.0523056	0.109343	0.283842	0.46502	0.598746	0.705472	0.724305	0.690895	0.584266	0.452754	0.294786	0.180341	0.15265	0.185438	0.241028	0.299346	0.410336	0.488521	0.559713	0.566001	0.524317	0.461193	0.353625	0.217635	0.0367883	-0.158912	-0.306811	-0.354851	-0.315991	-0.156146	0.0303776	0.201379	0.343269	0.434801	0.433844	0.37018	0.280497	0.104186	-0.165807	-0.490825	-0.845692	-1.10666	-1.23538	-1.16283	-0.933661	-0.69551
-0.138391	-0.22786	-0.343439	-0.42822	-0.483128	-0.450877	-0.291375	-0.0529665	0.199538	0.349889	0.364865	0.370174	0.394133	0.512976	0.6326	0.698608	0.595517	0.469245	0.385961	0.41093	0.509502	0.602877	0.66034	0.667265	0.65583	0.631025	0.607306	0.527552	0.361081	0.116887	-0.119212	-0.299289	-0.374333	-0.287695	-0.0767008	0.166163	0.34409	0.457918	0.478046	0.502332	0.413321	0.232712	0.0222072	-0.117606	-0.167555	-0.0877414	0.0322049	0.099471	0.138281	0.110092
0.518449	0.495562	0.418764	0.264691	0.0465445	-0.18963	-0.385752	-0.497017	-0.524143	-0.514749	-0.520461	-0.585612	-0.703677	-0.83365	-0.920797	-0.922046	-0.819933	-0.664198	-0.500868	-0.373529	-0.331837	-0.413895	-0.667491	-1.07581	-1.54355	-1.94107	-2.11165	-2.00057	-1.66189	-1.25035	-0.897779	-0.69494	-0.66097	-0.763482	-0.958445	-1.17223	-1.36982	-1.51707	-1.616	-1.66301	-1.66443	-1.62533	-1.54889	-1.48197	-1.43223	-1.41789	-1.42133	-1.44996	-1.50735	-1.59968
1.28135	1.27921	1.27337	1.25968	1.23879	1.21441	1.18073	1.13757	1.08994	1.06383	1.05806	1.05201	1.00683	0.885943	0.694729	0.488994	0.345708	0.305013	0.36691	0.463903	0.535973	0.538198	0.475444	0.356382	0.190565	0.0111984	-0.152309	-0.25886	-0.317606	-0.338795	-0.318884	-0.263467	-0.217137	-0.211776	-0.272555	-0.381553	-0.490129	-0.560362	-0.582735	-0.589387	-0.616114	-0.669743	-0.754441	-0.861154	-0.96479	-1.05657	-1.12135	-1.15562	-1.16193	-1.14086
0.923439	0.949096	0.980002	1.01371	1.02929	1.00317	0.918215	0.78559	0.624503	0.454043	0.281259	0.132369	0.0331434	-0.0089398	0.0125455	0.0725709	0.122542	0.11109	0.0185972	-0.148892	-0.352813	-0.563727	-0.742907	-0.873017	-0.95511	-0.995527	-0.993671	-0.939515	-0.836103	-0.678696	-0.49998	-0.350655	-0.2422	-0.160276	-0.0833894	-0.0133263	0.022315	-0.0239121	-0.175372	-0.401553	-0.633359	-0.795283	-0.859383	-0.833481	-0.754109	-0.654124	-0.553848	-0.464255	-0.388651	-0.336978
1.64557	1.6419	1.62769	1.59735	1.53638	1.43638	1.29709	1.13982	0.974745	0.796699	0.581174	0.317284	0.00792297	-0.320067	-0.612901	-0.856484	-1.04375	-1.18686	-1.30168	-1.40768	-1.50336	-1.5899	-1.67067	-1.74445	-1.80776	-1.82376	-1.78062	-1.67459	-1.51787	-1.32688	-1.12394	-0.919504	-0.722015	-0.541026	-0.371689	-0.193812	-0.0189484	0.119815	0.158642	0.0905297	-0.070731	-0.259592	-0.426492	-0.539888	-0.609529	-0.673872	-0.735895	-0.800949	-0.842611	-0.852195
1.1246	1.09896	1.03333	0.912103	0.740141	0.547603	0.370486	0.249598	0.202945	0.242373	0.361437	0.546269	0.757937	0.90032	0.924518	0.754136	0.363408	-0.2038	-0.829828	-1.38408	-1.79735	-2.09268	-2.35663	-2.65906	-2.99211	-3.28621	-3.45528	-3.42892	-3.17533	-2.77178	-2.2901	-1.83113	-1.44767	-1.12803	-0.871552	-0.678749	-0.559354	-0.530308	-0.582417	-0.718873	-0.893222	-1.0339	-1.09305	-1.07647	-1.02331	-0.973725	-0.941748	-0.929488	-0.935499	-0.941461
1.32587	1.31145	1.28413	1.24794	1.20863	1.18101	1.16185	1.14783	1.0991	0.99042	0.827942	0.650571	0.48493	0.374069	0.325	0.331278	0.385121	0.477354	0.596441	0.71202	0.812406	0.877866	0.915318	0.933228	0.928283	0.902911	0.835168	0.727866	0.590203	0.442872	0.317238	0.233722	0.168804	0.094725	0.0188627	-0.0497766	-0.103751	-0.179849	-0.29211	-0.471108	-0.719474	-0.991489	-1.22895	-1.40391	-1.52987	-1.62645	-1.70186	-1.76341	-1.8019	-1.82394
0.188323	0.206262	0.227697	0.256395	0.286175	0.312657	0.330365	0.341797	0.349691	0.372267	0.409756	0.454546	0.517946	0.59847	0.689337	0.769309	0.834092	0.875913	0.89899	0.906363	0.889955	0.843693	0.764694	0.666848	0.561522	0.442233	0.291813	0.121653	-0.0399595	-0.15099	-0.180848	-0.136572	-0.0801941	-0.0654039	-0.115872	-0.228514	-0.373605	-0.538066	-0.698942	-0.836906	-0.938686	-0.987999	-0.988367	-0.968025	-0.951058	-0.943657	-0.93913	-0.929271	-0.915637	-0.901389
1.00128	0.992769	0.956896	0.894545	0.797014	0.689017	0.574298	0.414384	0.194733	-0.0807044	-0.374243	-0.646671	-0.856146	-0.997793	-1.07102	-1.10206	-1.12613	-1.16013	-1.21871	-1.25761	-1.22666	-1.11972	-0.981642	-0.85828	-0.7745	-0.732126	-0.71876	-0.708422	-0.728851	-0.808416	-0.935919	-1.0368	-1.04469	-0.989272	-0.905826	-0.866026	-0.898754	-1.00202	-1.13708	-1.28749	-1.4555	-1.68289	-1.95606	-2.21983	-2.41977	-2.54504	-2.60995	-2.64708	-2.68569	-2.73573
-0.161777	-0.191341	-0.220165	-0.243456	-0.251076	-0.221305	-0.149764	-0.046831	0.0585209	0.151656	0.208882	0.215857	0.179775	0.11602	0.0491329	-0.0009194	-0.0224912	-0.00344346	0.0611884	0.163131	0.293997	0.420976	0.517296	0.562542	0.560162	0.521585	0.458586	0.391178	0.322336	0.250931	0.170947	0.0841841	0.00466909	-0.0619939	-0.0912812	-0.0944979	-0.106158	-0.143315	-0.208314	-0.281209	-0.348661	-0.393829	-0.419805	-0.423144	-0.412346	-0.389295	-0.369082	-0.351067	-0.334544	-0.319036
-0.836447	-0.776196	-0.709047	-0.645707	-0.609216	-0.593909	-0.594483	-0.598356	-0.599721	-0.599472	-0.576188	-0.512125	-0.40369	-0.251471	-0.0781429	0.0834365	0.205526	0.274112	0.267515	0.164071	-0.0713964	-0.443919	-0.921183	-1.41866	-1.86313	-2.20153	-2.40739	-2.47792	-2.42447	-2.31199	-2.1978	-2.10996	-2.02743	-1.92343	-1.80178	-1.70581	-1.69081	-1.74635	-1.87371	-2.08376	-2.33193	-2.56078	-2.73272	-2.82727	-2.84858	-2.82603	-2.77318	-2.70128	-2.62794	-2.57422
0.640744	0.840454	1.06553	1.30487	1.53442	1.70806	1.78226	1.70867	1.49499	1.20215	0.885764	0.582163	0.304816	0.09689	-0.00217922	0.0539589	0.266998	0.586471	0.947179	1.25214	1.4487	1.53812	1.55366	1.53949	1.51709	1.49507	1.4769	1.46405	1.44864	1.43489	1.41603	1.35478	1.21542	0.993508	0.709404	0.421873	0.185531	0.0114858	-0.135632	-0.289123	-0.431095	-0.546035	-0.628632	-0.678171	-0.713571	-0.749739	-0.766857	-0.751248	-0.696875	-0.625065
-0.775248	-0.733892	-0.687727	-0.641894	-0.603311	-0.574011	-0.547476	-0.516582	-0.475041	-0.422272	-0.358793	-0.300485	-0.256686	-0.236091	-0.235265	-0.25311	-0.286179	-0.328996	-0.375649	-0.427659	-0.484193	-0.536799	-0.577929	-0.594702	-0.587474	-0.563289	-0.540489	-0.528569	-0.524309	-0.504383	-0.460396	-0.398148	-0.33029	-0.266698	-0.208976	-0.167059	-0.15581	-0.193687	-0.277831	-0.387378	-0.485259	-0.541202	-0.55015	-0.533975	-0.521258	-0.528536	-0.558604	-0.607161	-0.663308	-0.718072
-0.738412	-0.771296	-0.793797	-0.804016	-0.800114	-0.788814	-0.782607	-0.791277	-0.819422	-0.859298	-0.907287	-0.956749	-1.01141	-1.06781	-1.11846	-1.14663	-1.13732	-1.07769	-0.963724	-0.806868	-0.639701	-0.470785	-0.311596	-0.169378	-0.051539	0.0405938	0.0969706	0.123557	0.141696	0.176001	0.241461	0.330999	0.431333	0.511216	0.545786	0.512164	0.412756	0.267368	0.117523	0.00941234	-0.0453815	-0.0589807	-0.0544627	-0.0465448	-0.0406892	-0.0386565	-0.0381195	-0.0298865	-0.0195886	-0.0141746
0.336015	0.388524	0.44131	0.494414	0.546824	0.59568	0.644721	0.688551	0.721825	0.742044	0.745468	0.733397	0.702705	0.660644	0.627053	0.595387	0.557605	0.51407	0.483451	0.493624	0.567915	0.691173	0.83154	0.956289	1.01318	1.01348	0.988725	0.968345	0.990346	1.09276	1.28562	1.50516	1.67723	1.7397	1.67424	1.50919	1.31831	1.14172	0.9903	0.868302	0.786182	0.745303	0.746961	0.787917	0.873225	0.967425	1.04019	1.07752	1.09936	1.12243
-0.168709	-0.205958	-0.23685	-0.284519	-0.360501	-0.47368	-0.625747	-0.78669	-0.939186	-1.052	-1.11191	-1.12728	-1.09918	-1.02945	-0.896284	-0.720579	-0.549742	-0.441442	-0.397363	-0.409765	-0.433901	-0.427982	-0.383481	-0.339972	-0.314937	-0.322837	-0.388023	-0.523721	-0.744482	-1.03103	-1.29089	-1.41437	-1.29219	-0.902088	-0.329718	0.276418	0.760553	1.01891	1.06851	0.975443	0.829436	0.711866	0.65638	0.652204	0.674251	0.70551	0.733975	0.757674	0.785372	0.822446
-0.48219	-0.495232	-0.47483	-0.401432	-0.273022	-0.113536	0.0426852	0.172282	0.274389	0.342672	0.372602	0.348634	0.28362	0.20741	0.13776	0.0630799	-0.0657238	-0.271747	-0.55666	-0.867448	-1.16224	-1.38244	-1.51106	-1.59447	-1.68867	-1.83796	-2.01094	-2.1666	-2.25757	-2.26915	-2.17108	-1.94674	-1.62496	-1.28398	-1.03512	-0.958019	-1.06642	-1.26977	-1.49496	-1.68039	-1.82592	-1.94159	-2.04009	-2.13363	-2.20367	-2.24376	-2.25771	-2.25364	-2.24827	-2.24345
0.627176	0.709094	0.810095	0.913081	1.01269	1.10422	1.14799	1.08653	0.847741	0.393687	-0.235575	-0.893837	-1.4312	-1.7724	-1.92356	-1.96284	-1.98714	-2.07621	-2.25604	-2.49678	-2.7541	-2.99078	-3.16536	-3.26364	-3.28773	-3.25836	-3.18639	-3.0913	-2.97927	-2.84067	-2.64303	-2.40006	-2.15204	-1.948	-1.80513	-1.67893	-1.57261	-1.52205	-1.56156	-1.70384	-1.89483	-2.05549	-2.12894	-2.09675	-1.94212	-1.71186	-1.46445	-1.28641	-1.24929	-1.39601
1.53629	1.46666	1.39379	1.31477	1.24045	1.17134	1.12298	1.09665	1.08804	1.08201	1.04334	0.946284	0.799862	0.644782	0.521814	0.460722	0.461682	0.507475	0.568118	0.614739	0.642082	0.662483	0.693263	0.729994	0.779468	0.853516	0.966407	1.11003	1.26261	1.3663	1.3822	1.28214	1.09594	0.854608	0.615116	0.39752	0.178577	-0.0818531	-0.383509	-0.702265	-1.01914	-1.28024	-1.46695	-1.54579	-1.49713	-1.30459	-0.978273	-0.541662	-0.0782427	0.334145
2.00391	2.10651	2.24506	2.42968	2.67216	2.96205	3.24355	3.4501	3.53145	3.49	3.36203	3.19652	3.03229	2.8919	2.77332	2.69024	2.62946	2.57	2.52718	2.5135	2.51806	2.53008	2.5341	2.51283	2.44958	2.31303	2.09143	1.80931	1.51118	1.26841	1.16291	1.18812	1.30065	1.4148	1.47436	1.44088	1.29237	1.06903	0.839741	0.662412	0.547436	0.479799	0.442673	0.418608	0.394283	0.377393	0.378827	0.403147	0.441048	0.488886
-0.658693	-0.676511	-0.692432	-0.705375	-0.685841	-0.581782	-0.399942	-0.165485	0.075817	0.302873	0.449683	0.473652	0.304996	-0.0161388	-0.403276	-0.7568	-0.963108	-0.961651	-0.813113	-0.627263	-0.488047	-0.391084	-0.324781	-0.270387	-0.219933	-0.160931	-0.10004	-0.0217615	0.122424	0.312698	0.500083	0.624573	0.684841	0.676963	0.587718	0.418779	0.189578	-0.0500518	-0.249005	-0.376416	-0.442712	-0.467915	-0.474219	-0.451916	-0.413408	-0.368926	-0.337171	-0.338913	-0.40109	-0.515455
2.21203	2.17428	2.12947	2.0678	2.00056	1.95995	1.95407	1.96819	1.94876	1.86564	1.72358	1.55711	1.39157	1.24949	1.12237	1.01895	0.948346	0.913983	0.901313	0.885721	0.84722	0.804041	0.774132	0.784478	0.815883	0.838735	0.808748	0.683889	0.441437	0.101303	-0.321752	-0.72701	-1.07832	-1.39846	-1.68783	-1.95429	-2.20413	-2.44057	-2.65062	-2.82808	-2.93161	-2.95258	-2.81664	-2.52098	-2.1114	-1.67358	-1.23566	-0.802494	-0.384455	0.00803706
-0.0327534	-0.0539295	-0.0769055	-0.102103	-0.114258	-0.117601	-0.0919559	-0.0394432	0.00528582	0.0183427	-0.0459911	-0.205341	-0.433904	-0.700042	-0.964058	-1.16106	-1.25095	-1.25438	-1.22838	-1.24546	-1.31376	-1.4102	-1.47049	-1.44131	-1.32799	-1.19388	-1.08379	-0.983186	-0.802178	-0.439979	0.116584	0.796035	1.443	1.95741	2.30886	2.54637	2.69044	2.75404	2.71069	2.52264	2.20879	1.86017	1.57116	1.37353	1.27153	1.22591	1.20014	1.16183	1.1176	1.08439
-0.35521	-0.254539	-0.148306	-0.0605748	-0.00444122	0.00952362	-0.00138486	-0.0337818	-0.0635569	-0.0822797	-0.0930154	-0.0875642	-0.0657333	-0.0319602	0.00220054	0.037736	0.0754622	0.126888	0.19368	0.276072	0.369457	0.456385	0.532186	0.585814	0.612784	0.610985	0.595285	0.575124	0.563936	0.578885	0.62885	0.69696	0.749073	0.745059	0.681273	0.563286	0.414147	0.297917	0.24624	0.248603	0.284588	0.339228	0.383238	0.416969	0.444711	0.478206	0.523134	0.565346	0.585967	0.575483
-1.2933	-1.46923	-1.62169	-1.70746	-1.68595	-1.56683	-1.40789	-1.26334	-1.17239	-1.10948	-1.0409	-0.959292	-0.886643	-0.811733	-0.749454	-0.714701	-0.726544	-0.770916	-0.856383	-0.982046	-1.11396	-1.2217	-1.22376	-1.07867	-0.819142	-0.561011	-0.368318	-0.235582	-0.106075	0.0439136	0.210597	0.401172	0.623579	0.854586	1.05621	1.21571	1.30414	1.292	1.12874	0.818702	0.434344	0.0687618	-0.172829	-0.225473	-0.0801807	0.243355	0.669474	1.12731	1.53167	1.84709
0.216012	0.260498	0.294402	0.340751	0.37462	0.386265	0.417069	0.480535	0.559803	0.627974	0.646863	0.629957	0.601058	0.580063	0.57274	0.570587	0.56357	0.559798	0.541381	0.514913	0.474372	0.419827	0.349359	0.265451	0.188162	0.12876	0.100692	0.105816	0.134007	0.170984	0.202149	0.218616	0.223912	0.225505	0.218112	0.197157	0.139021	0.0358831	-0.125308	-0.300486	-0.459233	-0.56159	-0.585365	-0.522051	-0.400728	-0.266951	-0.155061	-0.0805535	-0.0340674	-0.00173737
-0.798358	-0.813855	-0.828003	-0.850833	-0.885301	-0.926826	-0.95464	-0.939509	-0.84911	-0.679484	-0.457995	-0.203176	0.0479378	0.300673	0.560643	0.816146	1.03831	1.20638	1.30503	1.36026	1.40404	1.44707	1.50042	1.57183	1.65003	1.70485	1.68873	1.57707	1.36466	1.08757	0.823117	0.661593	0.637467	0.741418	0.903551	1.04512	1.07724	0.985527	0.783078	0.526349	0.283966	0.132173	0.0932506	0.141693	0.235983	0.336861	0.430464	0.507684	0.563233	0.601467
2.66376	2.73868	2.83072	2.9201	2.96684	2.93069	2.7769	2.50345	2.09794	1.61209	1.09665	0.610841	0.197978	-0.0989602	-0.278893	-0.352877	-0.324076	-0.205357	-0.0278631	0.191721	0.464442	0.780617	1.10413	1.372	1.56406	1.67383	1.71941	1.72538	1.71197	1.69793	1.69371	1.722	1.77721	1.82765	1.86059	1.84173	1.75704	1.63198	1.50328	1.39433	1.30442	1.21005	1.12089	1.04656	0.998195	0.990154	1.02415	1.08964	1.15841	1.1987
-1.69005	-1.6968	-1.71677	-1.74792	-1.7949	-1.85702	-1.9409	-2.04106	-2.14208	-2.24359	-2.33138	-2.41717	-2.49348	-2.55686	-2.58614	-2.59823	-2.58805	-2.54566	-2.48936	-2.4164	-2.34395	-2.27759	-2.23697	-2.22616	-2.24851	-2.27043	-2.2835	-2.25814	-2.18343	-2.0563	-1.87823	-1.65936	-1.44411	-1.28739	-1.215	-1.20465	-1.23129	-1.27566	-1.3242	-1.37984	-1.43987	-1.50498	-1.56154	-1.59895	-1.61629	-1.62087	-1.62803	-1.63614	-1.64226	-1.6488
-0.760884	-0.727297	-0.739438	-0.814908	-0.960201	-1.15491	-1.3316	-1.43318	-1.42585	-1.32073	-1.1524	-0.970527	-0.818239	-0.721555	-0.668344	-0.650785	-0.647317	-0.640886	-0.626142	-0.60533	-0.587135	-0.572956	-0.570123	-0.579396	-0.600086	-0.622217	-0.646919	-0.663985	-0.670502	-0.668458	-0.658815	-0.647101	-0.632499	-0.618311	-0.606035	-0.609489	-0.636052	-0.697357	-0.781662	-0.866593	-0.917415	-0.914179	-0.865789	-0.79642	-0.732399	-0.690936	-0.677282	-0.69349	-0.737203	-0.792251
0.795651	0.787776	0.780039	0.769307	0.754569	0.733643	0.720606	0.713646	0.713573	0.720492	0.728999	0.736402	0.741051	0.742279	0.755693	0.782224	0.808794	0.813128	0.766391	0.639686	0.423357	0.133165	-0.192775	-0.507837	-0.767243	-0.96466	-1.11598	-1.24358	-1.35781	-1.46797	-1.58454	-1.69097	-1.75899	-1.77222	-1.75117	-1.7362	-1.77601	-1.88017	-2.04404	-2.21987	-2.3556	-2.43027	-2.4517	-2.4413	-2.42008	-2.40455	-2.39869	-2.40181	-2.39516	-2.34469
-0.15453	-0.0230669	0.0171128	-0.0717898	-0.264112	-0.460789	-0.50863	-0.357488	-0.0147866	0.425774	0.858273	1.22192	1.51371	1.74192	1.92043	2.06162	2.16516	2.24854	2.3045	2.35318	2.39357	2.39375	2.35102	2.24994	2.07929	1.85569	1.59873	1.31962	1.0246	0.747222	0.53782	0.44634	0.462063	0.56587	0.733113	0.898587	1.01653	1.04013	0.95801	0.807053	0.652694	0.539502	0.482865	0.47642	0.483831	0.486528	0.470271	0.45129	0.43252	0.402781
1.13852	1.14999	1.16534	1.17666	1.18987	1.18605	1.14978	1.09271	1.02521	0.984174	1.00316	1.08811	1.21258	1.33396	1.41038	1.43168	1.4104	1.36626	1.32276	1.28882	1.26343	1.24595	1.23228	1.22292	1.22252	1.23714	1.26805	1.31027	1.3609	1.40372	1.43076	1.42699	1.38633	1.32004	1.25437	1.20179	1.1614	1.12806	1.09646	1.0748	1.07686	1.10683	1.15573	1.19695	1.22004	1.22998	1.23015	1.23474	1.23063	1.22459
0.664683	0.65401	0.655109	0.659366	0.680598	0.709808	0.747778	0.781333	0.79901	0.799664	0.784591	0.757862	0.72517	0.694873	0.674766	0.667917	0.670247	0.684869	0.718383	0.759582	0.797507	0.821459	0.814815	0.766796	0.658227	0.491761	0.262757	-0.0168714	-0.336629	-0.663398	-0.958438	-1.17616	-1.29815	-1.34863	-1.38977	-1.46364	-1.55852	-1.62177	-1.59848	-1.45513	-1.20766	-0.897314	-0.574578	-0.279054	-0.0266625	0.175342	0.336004	0.464585	0.563306	0.624928
-0.9201	-0.92612	-0.928884	-0.93683	-0.953349	-0.993575	-1.06373	-1.16127	-1.27467	-1.39531	-1.50866	-1.60222	-1.66546	-1.69177	-1.67615	-1.6302	-1.56584	-1.51126	-1.48572	-1.4843	-1.50696	-1.53448	-1.5564	-1.56261	-1.55081	-1.51992	-1.4616	-1.37291	-1.24694	-1.09843	-0.959827	-0.868771	-0.849711	-0.904917	-1.0124	-1.12655	-1.22355	-1.29459	-1.34883	-1.40245	-1.45175	-1.49662	-1.52836	-1.51586	-1.4397	-1.28434	-1.03879	-0.7279	-0.38847	-0.0730916
-0.777313	-0.743981	-0.701732	-0.655398	-0.617042	-0.59578	-0.597498	-0.619518	-0.652978	-0.687758	-0.713282	-0.725834	-0.716717	-0.685204	-0.642699	-0.603331	-0.57574	-0.561071	-0.552723	-0.546485	-0.541601	-0.530636	-0.512559	-0.483748	-0.434428	-0.358345	-0.260815	-0.156498	-0.0533376	0.0443549	0.130779	0.196754	0.23722	0.250255	0.240962	0.222787	0.205507	0.189642	0.164475	0.125972	0.0703585	0.00779856	-0.0523832	-0.103561	-0.141527	-0.166531	-0.181798	-0.188352	-0.186752	-0.178863
-1.76974	-1.63683	-1.44126	-1.18743	-0.909196	-0.69872	-0.619345	-0.691736	-0.889945	-1.1687	-1.49789	-1.82051	-2.08221	-2.23403	-2.26073	-2.18008	-2.0377	-1.90735	-1.84329	-1.85691	-1.91088	-1.99205	-2.05895	-2.10914	-2.18071	-2.30959	-2.51588	-2.72655	-2.87766	-2.88923	-2.749	-2.4204	-1.94295	-1.39048	-0.863091	-0.457474	-0.228742	-0.182917	-0.278126	-0.444002	-0.605201	-0.712388	-0.74288	-0.732219	-0.681636	-0.62836	-0.624141	-0.701253	-0.854347	-1.02037
-0.700798	-0.731419	-0.733932	-0.685323	-0.577793	-0.434565	-0.29338	-0.204544	-0.20108	-0.276564	-0.394018	-0.518799	-0.632335	-0.723828	-0.773429	-0.765215	-0.699753	-0.605166	-0.509146	-0.42983	-0.383295	-0.362698	-0.372255	-0.391967	-0.397968	-0.384853	-0.364822	-0.35855	-0.377629	-0.425278	-0.505014	-0.609869	-0.717825	-0.818152	-0.903305	-0.974983	-1.04217	-1.12732	-1.23479	-1.34648	-1.42948	-1.4396	-1.34768	-1.1782	-0.990208	-0.85079	-0.779249	-0.762162	-0.772914	-0.789514
-1.24482	-1.25241	-1.27772	-1.32298	-1.38546	-1.46923	-1.56351	-1.66561	-1.76433	-1.85214	-1.90321	-1.89489	-1.82162	-1.6913	-1.53102	-1.36275	-1.20402	-1.0612	-0.936255	-0.829918	-0.749592	-0.705437	-0.696398	-0.71308	-0.731012	-0.732791	-0.699117	-0.638678	-0.568873	-0.514376	-0.485634	-0.481429	-0.47845	-0.454675	-0.396076	-0.316422	-0.239518	-0.182417	-0.168134	-0.193691	-0.252413	-0.334534	-0.442629	-0.57415	-0.712457	-0.828415	-0.904642	-0.946257	-0.954286	-0.931623
-0.508434	-0.358944	-0.139918	0.125742	0.399224	0.632311	0.775953	0.822475	0.836244	0.861794	0.887563	0.778517	0.426868	-0.183184	-0.949551	-1.63445	-2.00401	-1.96931	-1.63583	-1.1829	-0.772371	-0.470306	-0.283773	-0.158196	-0.0469262	0.0564545	0.130121	0.146387	0.112651	0.0456212	-0.0513987	-0.153875	-0.275616	-0.440561	-0.646444	-0.858507	-1.0225	-1.12716	-1.15754	-1.10651	-0.979484	-0.791474	-0.567029	-0.352023	-0.182959	-0.0830994	-0.0564121	-0.0559447	-0.0595326	-0.0508518
-0.339782	-0.404977	-0.472099	-0.540964	-0.617656	-0.708914	-0.812527	-0.910012	-0.998982	-1.08745	-1.18174	-1.28731	-1.38073	-1.44375	-1.46004	-1.43147	-1.37934	-1.32122	-1.27103	-1.2309	-1.20084	-1.17209	-1.1308	-1.05765	-0.937537	-0.754987	-0.506519	-0.212824	0.0763438	0.289386	0.402989	0.438896	0.447702	0.468628	0.497446	0.490747	0.412181	0.248883	0.0261789	-0.196137	-0.389277	-0.537957	-0.65239	-0.746981	-0.816396	-0.83862	-0.81046	-0.724035	-0.595851	-0.467808
1.65866	1.72362	1.78583	1.83654	1.869	1.88114	1.87564	1.86259	1.85564	1.86246	1.88752	1.9134	1.92657	1.9182	1.88058	1.82428	1.76345	1.70293	1.64815	1.59481	1.5362	1.46582	1.36898	1.2215	1.0212	0.776763	0.5006	0.210201	-0.0911931	-0.397242	-0.695223	-0.942236	-1.08471	-1.08501	-0.961393	-0.743933	-0.467947	-0.185438	0.0731268	0.272157	0.4132	0.514833	0.593705	0.661748	0.71418	0.737791	0.726308	0.688677	0.62278	0.524613
2.15259	2.06604	1.90106	1.65035	1.34627	1.05638	0.814963	0.647353	0.536486	0.472545	0.436051	0.413745	0.391005	0.357822	0.326998	0.303782	0.300069	0.325708	0.394678	0.496967	0.614441	0.74784	0.902788	1.09417	1.33597	1.63061	1.95026	2.24933	2.48372	2.63108	2.65176	2.52701	2.29378	2.0049	1.7215	1.48726	1.32716	1.23694	1.19141	1.16362	1.13751	1.10107	1.04465	0.979575	0.91751	0.875702	0.868635	0.892407	0.969233	1.1208
-0.203803	-0.136978	-0.0428686	0.0815365	0.226676	0.358664	0.453898	0.490598	0.466881	0.409331	0.368265	0.381039	0.451076	0.561869	0.68627	0.81296	0.908702	0.916485	0.793603	0.488308	0.0197882	-0.538636	-1.07235	-1.49097	-1.72927	-1.80339	-1.74962	-1.63758	-1.53674	-1.48122	-1.47161	-1.50546	-1.57322	-1.65515	-1.73838	-1.82007	-1.90047	-1.96223	-1.99964	-2.01575	-2.02733	-2.04954	-2.09615	-2.15951	-2.22201	-2.27161	-2.2905	-2.27338	-2.22929	-2.16981
-1.01168	-0.873309	-0.67931	-0.438448	-0.195773	-0.00903879	0.0861432	0.0923335	0.0622973	0.041013	0.0475549	0.0628764	0.0805103	0.0862859	0.0908485	0.114338	0.151391	0.182835	0.173227	0.104049	-0.0511125	-0.289305	-0.582625	-0.874986	-1.14051	-1.36895	-1.55373	-1.70763	-1.83627	-1.94576	-2.04772	-2.13356	-2.16558	-2.05304	-1.77781	-1.36464	-0.916296	-0.592049	-0.468637	-0.526901	-0.663684	-0.787921	-0.863313	-0.908977	-0.944472	-0.991004	-1.05809	-1.13092	-1.20024	-1.23849
1.04194	0.907131	0.715372	0.464208	0.169771	-0.149445	-0.474029	-0.766069	-0.991936	-1.13245	-1.19504	-1.20141	-1.17233	-1.13195	-1.09997	-1.08515	-1.08814	-1.10763	-1.13139	-1.15081	-1.15874	-1.15561	-1.14873	-1.13542	-1.13158	-1.14029	-1.17066	-1.21622	-1.26853	-1.31723	-1.3524	-1.36894	-1.36481	-1.34351	-1.30809	-1.26509	-1.22413	-1.20401	-1.20848	-1.2425	-1.30152	-1.36969	-1.42746	-1.46405	-1.47306	-1.46309	-1.44373	-1.42564	-1.419	-1.42778
-1.02849	-1.14576	-1.31783	-1.56077	-1.84419	-2.13831	-2.41641	-2.67726	-2.88146	-3.01971	-3.06805	-3.01321	-2.83675	-2.558	-2.20492	-1.81103	-1.42794	-1.11822	-0.914436	-0.805244	-0.757398	-0.755045	-0.782396	-0.830539	-0.882379	-0.919493	-0.913542	-0.852688	-0.744725	-0.606185	-0.45823	-0.324969	-0.24014	-0.244204	-0.357355	-0.575213	-0.887838	-1.28326	-1.75931	-2.23134	-2.61607	-2.83232	-2.86718	-2.74626	-2.53931	-2.31597	-2.0958	-1.87994	-1.67991	-1.51267
-0.893301	-0.962047	-1.03251	-1.0897	-1.1206	-1.12722	-1.10293	-1.05843	-0.99543	-0.916444	-0.816531	-0.695795	-0.592235	-0.541193	-0.563697	-0.655344	-0.799522	-0.948942	-1.0505	-1.07362	-1.03257	-0.958747	-0.875948	-0.823894	-0.814983	-0.850251	-0.891325	-0.901656	-0.857552	-0.77121	-0.675186	-0.618951	-0.648067	-0.767196	-0.942639	-1.11782	-1.24811	-1.32369	-1.36162	-1.38915	-1.43416	-1.49347	-1.5702	-1.64775	-1.70479	-1.73392	-1.74005	-1.73914	-1.73563	-1.73195
-0.444236	-0.327369	-0.189321	-0.0439312	0.0913071	0.189466	0.249471	0.264031	0.234986	0.170507	0.0710201	-0.0683279	-0.247163	-0.452899	-0.657595	-0.835919	-0.959609	-1.0145	-1.00502	-0.950228	-0.876409	-0.80186	-0.744786	-0.711348	-0.704978	-0.712429	-0.726033	-0.732071	-0.720805	-0.693249	-0.65484	-0.62108	-0.601391	-0.59584	-0.606786	-0.639833	-0.691899	-0.757163	-0.826808	-0.890367	-0.945283	-0.988919	-1.02473	-1.06126	-1.09163	-1.11368	-1.13106	-1.1379	-1.13815	-1.13192
-0.658336	-0.714753	-0.795195	-0.890604	-0.996693	-1.09539	-1.17701	-1.24346	-1.29548	-1.32797	-1.339	-1.33663	-1.33496	-1.3343	-1.3211	-1.2807	-1.20306	-1.09789	-0.980591	-0.870208	-0.782378	-0.719348	-0.682365	-0.672524	-0.685798	-0.724453	-0.77921	-0.846121	-0.924855	-1.01639	-1.11941	-1.23214	-1.34931	-1.46354	-1.56108	-1.62243	-1.62173	-1.53212	-1.34801	-1.08147	-0.776812	-0.460729	-0.19666	-0.019296	0.0548284	0.0417324	-0.018058	-0.0824805	-0.130748	-0.16033
1.31571	1.26923	1.20272	1.12008	1.02445	0.92377	0.831641	0.760401	0.715754	0.694366	0.68864	0.688755	0.686556	0.681301	0.681318	0.689693	0.696192	0.689325	0.661328	0.608959	0.541976	0.474166	0.42277	0.391323	0.382766	0.393875	0.417608	0.436572	0.43183	0.389521	0.322579	0.256103	0.210444	0.196495	0.207586	0.227792	0.237705	0.222127	0.181558	0.119661	0.0516243	-0.00894353	-0.0535032	-0.0766372	-0.0828153	-0.0773847	-0.075761	-0.0902602	-0.120579	-0.148655
-1.06401	-1.01585	-0.948614	-0.863832	-0.773868	-0.696531	-0.654663	-0.661807	-0.702533	-0.73898	-0.747901	-0.716074	-0.640949	-0.549469	-0.45938	-0.377898	-0.276311	-0.110644	0.165682	0.544948	0.981029	1.4111	1.77018	2.01111	2.1108	2.07213	1.9303	1.72516	1.49515	1.27385	1.0599	0.835046	0.602864	0.381639	0.204553	0.091878	0.0308435	0.0130288	0.0136887	0.022594	0.044801	0.0937122	0.17948	0.290788	0.395081	0.457059	0.462765	0.415741	0.337968	0.258874
-0.291324	-0.272076	-0.263998	-0.300585	-0.361088	-0.449234	-0.539308	-0.575851	-0.531795	-0.415664	-0.281399	-0.176493	-0.126545	-0.0962149	-0.0383784	0.0717089	0.22541	0.370221	0.458355	0.447017	0.342447	0.197335	0.0406455	-0.116417	-0.287934	-0.500831	-0.750584	-1.02911	-1.34575	-1.67034	-1.96906	-2.19502	-2.29882	-2.28947	-2.20377	-2.09747	-2.02715	-2.02505	-2.10023	-2.23428	-2.40972	-2.61885	-2.84684	-3.04384	-3.19442	-3.27129	-3.25253	-3.16834	-3.06444	-2.95941
-0.753058	-0.743148	-0.734347	-0.730014	-0.738884	-0.759412	-0.77846	-0.785238	-0.784309	-0.788319	-0.815926	-0.859706	-0.905587	-0.931361	-0.928486	-0.895418	-0.844502	-0.784396	-0.715719	-0.660118	-0.631786	-0.65101	-0.720439	-0.827853	-0.949388	-1.06398	-1.15555	-1.21534	-1.24635	-1.25417	-1.26235	-1.27598	-1.3074	-1.35491	-1.41835	-1.48928	-1.55596	-1.62457	-1.69105	-1.75129	-1.7953	-1.81602	-1.81777	-1.80476	-1.78395	-1.76333	-1.74879	-1.73944	-1.74226	-1.75991
0.167736	0.316458	0.527191	0.819384	1.17692	1.55295	1.89022	2.12846	2.2426	2.22251	2.09154	1.8756	1.60404	1.31133	1.03064	0.805835	0.655602	0.578492	0.577471	0.633356	0.720947	0.808405	0.86825	0.895028	0.887129	0.826244	0.714061	0.557047	0.375438	0.203744	0.0693903	-0.0152387	-0.0390753	-0.0264386	0.00604607	0.0490218	0.0940175	0.145327	0.191281	0.229003	0.251631	0.270546	0.295835	0.339815	0.390142	0.436827	0.479337	0.51354	0.548799	0.590571
0.310023	0.256111	0.179912	0.0706116	-0.0537844	-0.15882	-0.21691	-0.192115	-0.10419	0.0337026	0.17599	0.31948	0.458193	0.613431	0.78656	0.950046	1.096	1.18641	1.26546	1.36321	1.52928	1.80122	2.17341	2.58097	2.95945	3.21175	3.28687	3.19108	2.98008	2.7278	2.4744	2.23181	2.01136	1.82975	1.67753	1.56624	1.49501	1.46995	1.46708	1.47438	1.47284	1.46875	1.48591	1.53965	1.6495	1.82609	2.03908	2.26484	2.4754	2.65775
-1.4299	-1.42865	-1.407	-1.35791	-1.28223	-1.18794	-1.08661	-0.993753	-0.918597	-0.861967	-0.811508	-0.740165	-0.618002	-0.435496	-0.211466	0.0125753	0.179504	0.251047	0.220802	0.115052	-0.0331588	-0.183368	-0.307525	-0.400291	-0.468191	-0.522923	-0.570619	-0.609969	-0.637311	-0.656284	-0.67122	-0.687265	-0.705958	-0.727847	-0.753115	-0.779769	-0.811456	-0.842674	-0.872514	-0.89657	-0.912563	-0.927207	-0.950102	-0.975582	-0.991597	-0.986144	-0.956289	-0.910651	-0.864469	-0.828918
-1.16545	-1.24674	-1.34484	-1.45457	-1.54174	-1.59594	-1.60324	-1.57652	-1.53152	-1.48959	-1.49274	-1.56728	-1.71043	-1.90691	-2.13182	-2.34268	-2.53419	-2.69772	-2.84558	-2.97715	-3.08554	-3.15516	-3.17784	-3.15215	-3.09946	-3.0476	-3.00365	-2.97717	-2.95133	-2.91475	-2.87141	-2.81588	-2.74428	-2.65108	-2.53773	-2.43861	-2.39938	-2.42999	-2.53004	-2.67654	-2.85182	-3.04143	-3.24287	-3.42612	-3.56061	-3.60566	-3.52024	-3.30511	-2.99884	-2.66712
-0.297671	-0.279449	-0.250185	-0.185817	-0.0656288	0.136173	0.42658	0.804101	1.21243	1.60568	1.94761	2.22287	2.42388	2.5563	2.63717	2.69053	2.72103	2.73126	2.72632	2.7139	2.69546	2.66472	2.62768	2.58018	2.53057	2.49809	2.48594	2.48855	2.4994	2.51554	2.54335	2.5723	2.57906	2.56546	2.52077	2.43919	2.32597	2.20183	2.06839	1.92601	1.78827	1.66119	1.57464	1.52371	1.51117	1.51153	1.51528	1.52149	1.54626	1.58969
0.722734	0.678656	0.633748	0.601124	0.586808	0.592669	0.619822	0.666895	0.750009	0.86298	0.986555	1.09488	1.16452	1.18956	1.18947	1.18781	1.21644	1.29522	1.41612	1.56723	1.71131	1.80364	1.84284	1.83847	1.79732	1.7309	1.62862	1.48514	1.31739	1.14364	1.00039	0.902418	0.847527	0.830418	0.830381	0.827612	0.813933	0.798508	0.780464	0.767354	0.747831	0.73181	0.716839	0.708314	0.71287	0.728201	0.758312	0.790491	0.822821	0.846377
-0.779359	-0.775897	-0.773266	-0.771827	-0.737449	-0.614928	-0.372907	0.00869304	0.498598	1.0499	1.6105	2.13607	2.60492	2.9868	3.2504	3.3839	3.40656	3.35694	3.27018	3.17449	3.10993	3.12518	3.21758	3.34077	3.41779	3.34226	3.03956	2.49383	1.77028	1.01366	0.357864	-0.0780004	-0.261957	-0.244379	-0.148959	-0.081359	-0.0836719	-0.138794	-0.19718	-0.23823	-0.259429	-0.29735	-0.347199	-0.389714	-0.410648	-0.405528	-0.381904	-0.358388	-0.369047	-0.426266
-0.650156	-0.566462	-0.473757	-0.39076	-0.331385	-0.318987	-0.355546	-0.430387	-0.515404	-0.575854	-0.585362	-0.530134	-0.424544	-0.289471	-0.164643	-0.0688339	-0.0336866	-0.0868773	-0.230413	-0.444632	-0.687143	-0.901571	-1.03698	-1.07874	-1.05709	-1.02228	-1.0018	-1.00489	-1.01376	-1.00562	-0.985705	-0.985682	-1.03842	-1.15691	-1.30963	-1.44768	-1.54277	-1.59408	-1.63149	-1.6839	-1.74617	-1.81697	-1.88323	-1.95207	-2.02571	-2.09594	-2.14215	-2.17639	-2.2025	-2.24426
0.613471	0.628871	0.629788	0.607235	0.534338	0.395047	0.184693	-0.0976375	-0.434653	-0.795771	-1.14051	-1.42881	-1.63814	-1.76066	-1.80126	-1.77585	-1.69415	-1.56937	-1.4219	-1.2892	-1.20315	-1.1675	-1.15943	-1.13879	-1.08412	-1.02558	-1.00869	-1.05999	-1.1615	-1.25835	-1.30551	-1.29731	-1.27264	-1.27936	-1.34344	-1.45729	-1.58355	-1.67684	-1.70687	-1.67048	-1.59209	-1.51949	-1.49669	-1.5436	-1.63376	-1.72273	-1.77174	-1.75913	-1.69782	-1.60418
-1.29221	-1.30429	-1.2934	-1.23451	-1.10755	-0.900042	-0.616576	-0.273135	0.0837879	0.418147	0.71388	1.00272	1.31354	1.66909	2.04303	2.38321	2.63098	2.76352	2.79533	2.76864	2.73416	2.69331	2.64283	2.57742	2.49281	2.3725	2.22901	2.0733	1.92003	1.77661	1.63425	1.4909	1.36334	1.26402	1.1984	1.14378	1.04391	0.860714	0.59902	0.279846	-0.0491294	-0.338928	-0.582006	-0.802315	-1.01435	-1.20145	-1.30442	-1.26395	-1.07811	-0.795135
-0.285958	-0.167883	-0.0178183	0.0888759	0.14244	0.161032	0.125136	0.104423	0.105302	0.130821	0.159754	0.171776	0.114471	0.0356627	-0.0407351	-0.0913186	-0.093915	-0.0812634	-0.0430251	0.0157144	0.0731108	0.0886817	0.0951574	0.0916457	0.077539	0.079902	0.101903	0.11689	0.107753	0.0630678	0.0292574	0.0102452	-0.0138586	-0.0641544	-0.117954	-0.148921	-0.128314	-0.0279283	0.0934455	0.184936	0.213187	0.200501	0.137089	0.0152554	-0.136467	-0.332463	-0.535591	-0.706942	-0.824765	-0.885561
1.83035	1.74845	1.66665	1.58786	1.57804	1.64656	1.6923	1.66034	1.56091	1.3806	1.15765	0.995794	0.88327	0.821655	0.801433	0.769209	0.719288	0.643274	0.503948	0.331173	0.239053	0.335624	0.61843	1.03769	1.42291	1.66951	1.76505	1.79698	1.83402	1.85746	1.85916	1.82584	1.82465	1.83871	1.81764	1.70991	1.44763	1.16289	0.953177	0.920269	0.992528	1.16561	1.27157	1.32577	1.35319	1.39409	1.40966	1.37166	1.26944	1.06177
-1.1948	-1.28557	-1.40056	-1.53794	-1.66397	-1.73969	-1.74846	-1.66976	-1.53211	-1.3252	-1.08022	-0.827445	-0.59927	-0.411029	-0.260664	-0.144056	-0.0685789	-0.085098	-0.0954961	-0.126149	-0.079455	-0.00694368	0.0898802	0.179865	0.218069	0.221461	0.18753	0.130501	0.0278786	-0.125374	-0.365465	-0.661626	-0.899954	-0.994414	-0.922526	-0.757756	-0.580249	-0.44727	-0.356907	-0.235805	-0.0427879	0.120775	0.183278	0.14114	-0.0355842	-0.250418	-0.411093	-0.505195	-0.528118	-0.499776
0.916769	0.927615	0.901605	0.789721	0.644707	0.517317	0.437346	0.401769	0.438617	0.537447	0.678661	0.814972	0.916741	1.00518	1.08459	1.14138	1.17867	1.15386	1.09808	1.0655	1.13369	1.27978	1.44445	1.59699	1.58302	1.41833	1.16375	0.861795	0.654009	0.511455	0.441151	0.358336	0.291815	0.218509	0.239644	0.3393	0.460123	0.569496	0.556712	0.489923	0.41317	0.378972	0.323203	0.293289	0.21802	0.142779	0.076403	0.021391	0.0266675	0.0542992
0.13258	0.181969	0.266219	0.395125	0.519152	0.594145	0.56235	0.472235	0.38948	0.391398	0.46626	0.564205	0.684358	0.789071	0.861248	0.852658	0.819635	0.792609	0.838426	0.916232	1.03214	1.0882	1.05169	0.925339	0.754607	0.617112	0.557564	0.518241	0.390328	0.147554	-0.17423	-0.458552	-0.620142	-0.664003	-0.648603	-0.626638	-0.666608	-0.736647	-0.811398	-0.841852	-0.845221	-0.824217	-0.883826	-1.01978	-1.20217	-1.36693	-1.38642	-1.21562	-0.871932	-0.515332
-1.34767	-1.34706	-1.36378	-1.43782	-1.56818	-1.70301	-1.85696	-2.00392	-2.1262	-2.16411	-2.10603	-1.92845	-1.67381	-1.36791	-1.05914	-0.764217	-0.476266	-0.219255	-0.00947329	0.137548	0.170681	0.0274306	-0.251792	-0.58381	-0.8418	-0.941847	-0.947089	-0.886954	-0.807208	-0.70454	-0.589266	-0.438321	-0.317723	-0.321847	-0.46582	-0.698188	-0.96923	-1.22021	-1.36636	-1.3543	-1.16196	-0.843297	-0.476329	-0.129479	0.141016	0.294296	0.368005	0.357886	0.292616	0.198807
-0.493926	-0.71972	-0.903684	-1.01367	-1.05089	-0.983661	-0.87155	-0.705414	-0.515391	-0.343672	-0.227542	-0.117066	-0.032585	0.0180591	0.0269117	-0.003506	-0.0253132	-0.028296	0.0212588	0.0915941	0.16895	0.141531	0.0217532	-0.186953	-0.384726	-0.54108	-0.603684	-0.577571	-0.54074	-0.495291	-0.473333	-0.481732	-0.51235	-0.571219	-0.641062	-0.710572	-0.772695	-0.782039	-0.744703	-0.664598	-0.587854	-0.486246	-0.348264	-0.178914	0.0225139	0.273728	0.492301	0.639062	0.689342	0.602585
0.546458	0.341131	0.120879	-0.0546657	-0.184785	-0.284616	-0.255739	-0.0960658	0.163383	0.445267	0.65061	0.707998	0.595065	0.414151	0.281836	0.196668	0.154674	0.0844598	-0.0932735	-0.337047	-0.596653	-0.774946	-0.889907	-0.933915	-0.910391	-0.87496	-0.860329	-0.781243	-0.677821	-0.600125	-0.51566	-0.50134	-0.58926	-0.719778	-0.866379	-0.918336	-0.888811	-0.77399	-0.663641	-0.521277	-0.381878	-0.215566	-0.0428154	0.0919518	0.174011	0.156065	0.0775076	-0.0713467	-0.142828	-0.189707
0.133054	0.261163	0.376755	0.481042	0.491274	0.390856	0.264635	0.163678	0.132517	0.185232	0.257805	0.314442	0.399823	0.553331	0.721857	0.846899	0.908793	0.831686	0.656455	0.402264	0.182163	0.0110127	-0.0960286	-0.1808	-0.295451	-0.461373	-0.569458	-0.552885	-0.425497	-0.158924	0.120413	0.261356	0.147715	-0.189671	-0.603633	-0.917379	-1.07698	-1.13623	-1.17131	-1.18572	-1.16674	-1.02019	-0.8806	-0.843826	-1.00301	-1.25589	-1.4939	-1.5732	-1.55435	-1.46353
-0.2463	-0.250304	-0.193589	-0.102851	0.0160298	0.129848	0.179075	0.219783	0.231895	0.232153	0.250992	0.268461	0.290908	0.36181	0.452795	0.571179	0.70792	0.815736	0.894294	0.950498	0.962261	0.946037	0.901577	0.827009	0.805095	0.878112	1.00195	1.13549	1.19934	1.12271	0.957261	0.777546	0.665562	0.627142	0.573302	0.472523	0.262722	-0.0509172	-0.262955	-0.286893	-0.150958	0.0504316	0.18815	0.245418	0.247589	0.199323	0.154557	0.109743	0.0472691	-0.0565659
-1.4984	-1.4493	-1.50367	-1.6489	-1.85818	-2.10209	-2.24464	-2.2699	-2.13477	-1.87802	-1.55009	-1.19977	-0.850642	-0.535567	-0.259389	-0.0221057	0.101342	0.114144	-0.0381438	-0.215211	-0.356037	-0.404171	-0.380979	-0.401531	-0.455471	-0.57679	-0.725322	-0.827082	-0.902312	-1.0034	-1.13677	-1.26169	-1.26992	-1.17811	-1.04802	-0.952479	-0.958766	-1.00289	-1.05257	-1.06658	-1.03521	-0.970513	-1.00562	-1.07668	-1.14279	-1.16032	-1.05907	-0.905655	-0.734711	-0.686084
-0.329676	-0.360514	-0.33099	-0.244921	-0.0644843	0.151091	0.355405	0.491572	0.535096	0.445267	0.316637	0.172078	0.0683269	0.00401352	0.020192	0.124969	0.275412	0.449512	0.545366	0.580387	0.538018	0.454174	0.408818	0.399043	0.419668	0.467593	0.525921	0.580084	0.632499	0.681371	0.676405	0.643807	0.528303	0.375117	0.20102	0.0756129	0.0564499	0.112711	0.231277	0.301807	0.304869	0.283671	0.294589	0.373175	0.503831	0.622087	0.635633	0.480429	0.184788	-0.134167
-0.178751	-0.248462	-0.319027	-0.346258	-0.396873	-0.467306	-0.568023	-0.616663	-0.54407	-0.435625	-0.328052	-0.255765	-0.279817	-0.42315	-0.608704	-0.819504	-0.955405	-1.05796	-1.19376	-1.32133	-1.44491	-1.55513	-1.64467	-1.6382	-1.61101	-1.59824	-1.57237	-1.56974	-1.56128	-1.54821	-1.54457	-1.56155	-1.60099	-1.71807	-1.89726	-2.13736	-2.321	-2.32414	-2.12148	-1.73557	-1.22416	-0.705205	-0.195249	0.240254	0.473243	0.518948	0.368158	0.136833	-0.112422	-0.286973
-0.901496	-0.966413	-0.986533	-0.999832	-0.981304	-0.925113	-0.824447	-0.687659	-0.548473	-0.41606	-0.307848	-0.239107	-0.149104	0.00103498	0.177715	0.303069	0.321777	0.2288	0.0710561	-0.0731073	-0.121784	-0.0325559	0.157833	0.329137	0.384754	0.304383	0.143478	0.00854382	-0.0762861	-0.0879136	-0.0742061	-0.103738	-0.215698	-0.358763	-0.479393	-0.541264	-0.54169	-0.499681	-0.472963	-0.523271	-0.659485	-0.74953	-0.805415	-0.785827	-0.708349	-0.610553	-0.528556	-0.467995	-0.414747	-0.395736
-0.33737	-0.513458	-0.574136	-0.507563	-0.342763	-0.14895	0.0749165	0.29164	0.509671	0.648614	0.619848	0.477341	0.223222	-0.0016516	-0.129409	-0.168357	-0.176415	-0.153291	-0.124778	-0.139152	-0.257477	-0.375121	-0.42296	-0.37479	-0.288757	-0.206715	-0.173393	-0.131383	-0.0354375	0.140003	0.359564	0.507869	0.54707	0.554886	0.560961	0.562575	0.503268	0.333552	0.0685788	-0.169423	-0.198392	0.0534071	0.39879	0.638227	0.671707	0.406871	-0.0185918	-0.488229	-0.891107	-1.11864
0.744631	0.777594	0.774929	0.666163	0.465079	0.147347	-0.182735	-0.38688	-0.432034	-0.334325	-0.170328	0.0751504	0.335544	0.58527	0.784877	0.836915	0.742815	0.590069	0.499658	0.536318	0.704218	0.916423	1.12322	1.25758	1.29009	1.24171	1.07312	0.823022	0.500152	0.163884	-0.116319	-0.243184	-0.204107	-0.112682	-0.114725	-0.236719	-0.372329	-0.411381	-0.308672	-0.103741	0.123981	0.331432	0.539175	0.760611	0.982257	1.17047	1.26336	1.21181	1.09371	0.868532
-0.814973	-0.800763	-0.85036	-0.916074	-0.934978	-0.893589	-0.759593	-0.523901	-0.253131	-0.00749446	0.131164	0.127409	0.0351645	0.00135934	0.0370386	0.100498	0.129796	0.0279534	-0.221865	-0.574052	-0.893202	-1.02225	-0.965446	-0.751943	-0.536432	-0.402353	-0.487247	-0.707718	-1.08151	-1.43298	-1.67253	-1.75613	-1.69268	-1.54505	-1.38098	-1.25173	-1.15809	-1.08104	-1.00272	-0.984858	-1.0419	-1.16169	-1.28367	-1.34856	-1.27309	-1.05752	-0.730013	-0.358759	-0.0136567	0.142536
0.591193	0.411817	0.167479	-0.121858	-0.401506	-0.569062	-0.643879	-0.552326	-0.343531	-0.0752269	0.223552	0.45124	0.630416	0.673441	0.61277	0.452278	0.244144	0.0875872	-0.00960896	-0.0927128	-0.151761	-0.22158	-0.226471	-0.173407	-0.138809	-0.106194	-0.14477	-0.217047	-0.321136	-0.335081	-0.249202	-0.0161746	0.219715	0.389134	0.428936	0.378969	0.265917	0.0556741	-0.2183	-0.440097	-0.576973	-0.641096	-0.677645	-0.747411	-0.823024	-0.872834	-0.784066	-0.61507	-0.447259	-0.360497
-0.000700689	-0.0349352	-0.0939796	-0.138045	-0.200431	-0.282006	-0.335398	-0.356389	-0.320024	-0.255978	-0.140762	-0.0402177	0.0657648	0.126364	0.238986	0.300206	0.335613	0.323121	0.278196	0.221077	0.128889	-0.0449876	-0.327175	-0.65167	-0.864907	-0.857303	-0.676893	-0.364512	-0.0371029	0.219226	0.356665	0.372099	0.351737	0.322236	0.252211	0.154401	-0.0161892	-0.212417	-0.337157	-0.393299	-0.327625	-0.293	-0.387302	-0.667558	-1.01319	-1.38848	-1.608	-1.68668	-1.68561	-1.61185
-0.918023	-0.871823	-0.792869	-0.648434	-0.519382	-0.407763	-0.369714	-0.387633	-0.493026	-0.607043	-0.730502	-0.822113	-0.883886	-0.898121	-0.863608	-0.811695	-0.775729	-0.778279	-0.816463	-0.907852	-0.98993	-1.0631	-1.12956	-1.19705	-1.28335	-1.34843	-1.3818	-1.36569	-1.27892	-1.14259	-0.988016	-0.839763	-0.737542	-0.726636	-0.7698	-0.850264	-0.93286	-1.00163	-1.02285	-1.00061	-0.952002	-0.918541	-0.931155	-1.01898	-1.15426	-1.319	-1.43554	-1.47822	-1.44029	-1.32617
-0.338123	-0.325784	-0.259368	-0.18609	-0.077709	0.032034	0.0589108	0.000142772	-0.137032	-0.260117	-0.329282	-0.29371	-0.196783	-0.0603668	0.0644115	0.114664	0.0506597	-0.0964239	-0.237948	-0.288459	-0.258621	-0.184275	-0.0719868	0.00599875	-0.0503576	-0.24622	-0.529429	-0.758763	-0.904961	-0.94042	-0.885316	-0.784999	-0.69577	-0.63269	-0.614645	-0.704769	-0.854537	-0.981594	-0.931451	-0.792433	-0.666796	-0.65937	-0.754834	-0.928244	-1.06561	-1.08765	-1.02225	-0.863862	-0.74884	-0.701649
-0.408876	-0.360487	-0.233606	-0.10367	0.0722272	0.195134	0.172909	0.018659	-0.217502	-0.481198	-0.619992	-0.662871	-0.650627	-0.577505	-0.440416	-0.244965	-0.0434102	0.127703	0.291501	0.43172	0.509356	0.518696	0.468155	0.380689	0.325957	0.324313	0.314271	0.281768	0.183245	0.0843106	0.0571404	0.0851047	0.145671	0.189928	0.163327	0.102619	0.0495956	0.0311074	0.00426584	-0.0896585	-0.23743	-0.373134	-0.463098	-0.427627	-0.278127	-0.0352782	0.217549	0.453578	0.605884	0.613757
1.73658	1.73267	1.69295	1.59672	1.47553	1.3475	1.22629	1.07664	0.955292	0.904377	0.955853	1.15796	1.4422	1.68209	1.78909	1.797	1.67723	1.4637	1.17907	0.897128	0.601752	0.357697	0.225095	0.174865	0.195409	0.214885	0.2146	0.220422	0.216482	0.141408	0.0845055	0.0404968	0.0501678	0.145471	0.252533	0.35079	0.318673	0.166983	-0.0424213	-0.109751	-0.0266305	0.147348	0.390816	0.637466	0.847743	1.00391	1.11485	1.09426	0.924372	0.689616
0.594386	0.705841	0.772291	0.741727	0.648403	0.511041	0.390496	0.354719	0.429156	0.51746	0.554819	0.538653	0.49113	0.393205	0.318195	0.276758	0.263267	0.294379	0.337499	0.468355	0.671307	0.895269	1.03583	1.05929	1.01948	0.967425	0.960042	1.05152	1.12756	1.05938	0.81814	0.442548	0.080996	-0.16742	-0.270636	-0.183942	-0.0701747	-0.00408164	0.0684442	0.164116	0.304809	0.505134	0.688695	0.83067	0.959666	1.08	1.24419	1.39142	1.5453	1.70333
0.417584	0.434284	0.475578	0.488396	0.466023	0.410741	0.356992	0.276234	0.218282	0.144333	0.0904438	0.0738501	0.0866574	0.113457	0.0742334	0.0338768	0.0371574	0.0365632	0.0433972	0.037371	0.0950211	0.225753	0.417406	0.577801	0.695381	0.697121	0.623344	0.522367	0.408316	0.25723	0.0527847	-0.174904	-0.387995	-0.51678	-0.541188	-0.496357	-0.413743	-0.337401	-0.306662	-0.355275	-0.405651	-0.407359	-0.37797	-0.329148	-0.396611	-0.543792	-0.758551	-0.998552	-1.15322	-1.12048
-0.698519	-0.532943	-0.409025	-0.368024	-0.442758	-0.623398	-0.860519	-1.01358	-1.04338	-0.953742	-0.791589	-0.608625	-0.543177	-0.586571	-0.66509	-0.71895	-0.727885	-0.736202	-0.747976	-0.791436	-0.85677	-0.886189	-0.838441	-0.814676	-0.849254	-0.993991	-1.21245	-1.40568	-1.5559	-1.6223	-1.61187	-1.52982	-1.38871	-1.1594	-0.932667	-0.735138	-0.651147	-0.645641	-0.664909	-0.613209	-0.506875	-0.388434	-0.261554	-0.154297	-0.029953	0.0973464	0.186275	0.212118	0.117016	-0.0577366
0.377367	0.343372	0.224323	0.0290236	-0.222736	-0.431365	-0.555236	-0.60739	-0.657166	-0.675218	-0.675359	-0.741936	-0.803011	-0.909784	-1.05862	-1.27934	-1.47813	-1.57931	-1.57926	-1.46654	-1.28643	-1.05317	-0.845276	-0.7439	-0.779327	-0.914269	-1.099	-1.25122	-1.34871	-1.41607	-1.4809	-1.52969	-1.57691	-1.6311	-1.69295	-1.74143	-1.73238	-1.64815	-1.50688	-1.35067	-1.21837	-1.1519	-1.17625	-1.34992	-1.60534	-1.8685	-2.05243	-2.13973	-2.11767	-2.04331
-0.960252	-0.826747	-0.697612	-0.608391	-0.566465	-0.523936	-0.457871	-0.38774	-0.358084	-0.395051	-0.460639	-0.501153	-0.427127	-0.238449	0.000576437	0.273657	0.526992	0.718649	0.857073	0.918946	0.917941	0.88524	0.832155	0.808734	0.724223	0.583635	0.393468	0.257347	0.182587	0.193383	0.269738	0.358257	0.381891	0.330705	0.25939	0.206375	0.215405	0.220895	0.207116	0.170049	0.110694	0.0421025	0.0155144	-0.0158263	-0.0460856	-0.00957075	0.156304	0.402736	0.627001	0.758751
0.395444	0.429651	0.49999	0.609823	0.742556	0.849172	0.904821	0.914062	0.90309	0.858941	0.763094	0.69695	0.608635	0.518642	0.457326	0.461809	0.447546	0.338299	0.113579	-0.256733	-0.661026	-1.03021	-1.27969	-1.45443	-1.58865	-1.71892	-1.86274	-1.91245	-1.92429	-1.82591	-1.68588	-1.4972	-1.25934	-1.01411	-0.825407	-0.737371	-0.741663	-0.826118	-0.935353	-0.991918	-1.01127	-1.06266	-1.18551	-1.30727	-1.30071	-1.12679	-0.874476	-0.690807	-0.698173	-0.919913
-0.831208	-0.945651	-1.00291	-0.992076	-0.941431	-0.852696	-0.828276	-0.89543	-1.0167	-1.16388	-1.271	-1.28515	-1.29204	-1.37204	-1.52692	-1.73073	-1.91498	-2.0418	-2.12512	-2.04916	-1.92224	-1.76651	-1.62162	-1.51731	-1.43133	-1.38693	-1.40411	-1.46652	-1.5066	-1.5611	-1.58857	-1.58398	-1.56734	-1.47334	-1.27554	-1.04232	-0.767332	-0.573239	-0.516867	-0.617131	-0.76953	-0.938909	-0.985252	-0.946338	-0.891951	-0.89105	-0.901466	-0.93768	-0.99575	-1.10218
0.439716	0.423393	0.374875	0.303036	0.22291	0.0664296	-0.14652	-0.396334	-0.636655	-0.821651	-0.947637	-1.01506	-1.05213	-1.05303	-0.939797	-0.726416	-0.416505	-0.11486	0.134321	0.210515	0.123284	-0.1422	-0.45003	-0.728319	-0.825372	-0.785547	-0.661959	-0.529775	-0.514543	-0.670652	-0.916718	-1.20322	-1.49514	-1.7428	-1.92063	-1.95243	-1.86406	-1.63696	-1.33602	-1.00908	-0.737237	-0.539854	-0.430207	-0.416381	-0.512738	-0.672355	-0.837077	-0.940742	-0.963197	-0.865545
0.267299	0.294918	0.325905	0.319317	0.332484	0.364578	0.423766	0.498627	0.589343	0.724398	0.921245	1.19013	1.45602	1.71713	1.90075	2.00802	2.0558	2.03931	1.98907	1.82952	1.6344	1.38461	1.14659	0.895734	0.641363	0.411654	0.206483	0.0166986	-0.130482	-0.199808	-0.237665	-0.276128	-0.368134	-0.5297	-0.690638	-0.785976	-0.793934	-0.770927	-0.745877	-0.761737	-0.785391	-0.840725	-0.95763	-1.12642	-1.30486	-1.47943	-1.57631	-1.56712	-1.43382	-1.19302
-1.06361	-0.899888	-0.744734	-0.608452	-0.509584	-0.49937	-0.563015	-0.691522	-0.806387	-0.822711	-0.758294	-0.636322	-0.4796	-0.404269	-0.411349	-0.482585	-0.638945	-0.839374	-1.01411	-1.1087	-1.12747	-1.09723	-1.04705	-1.01812	-1.04879	-1.14058	-1.28204	-1.40756	-1.49792	-1.484	-1.37698	-1.26856	-1.23585	-1.27158	-1.30781	-1.33264	-1.32032	-1.28447	-1.23905	-1.22829	-1.23816	-1.26375	-1.35896	-1.50478	-1.62311	-1.65979	-1.56662	-1.4	-1.21455	-1.08633
1.06395	1.04737	0.999666	0.930425	0.870743	0.913956	1.05648	1.1898	1.22566	1.13866	0.970127	0.785553	0.637414	0.534743	0.466261	0.458444	0.486731	0.54143	0.615653	0.699417	0.801972	0.850448	0.859152	0.820056	0.724545	0.564341	0.368813	0.186355	0.0137472	-0.193475	-0.518755	-0.885694	-1.24807	-1.46364	-1.47995	-1.3164	-1.13924	-1.01518	-0.939774	-0.863948	-0.764174	-0.627199	-0.531982	-0.499843	-0.489727	-0.469468	-0.428928	-0.460098	-0.537529	-0.726199
0.423002	0.521095	0.640188	0.807237	0.936493	1.02524	0.988442	0.832099	0.648618	0.494604	0.426723	0.418669	0.416434	0.430084	0.400956	0.393041	0.35559	0.361339	0.402993	0.462666	0.53117	0.537398	0.48811	0.382061	0.274619	0.207675	0.188314	0.196266	0.222652	0.206575	0.22549	0.219346	0.119744	-0.0638308	-0.355562	-0.696142	-0.916945	-0.982144	-0.978771	-0.986621	-1.02777	-1.02818	-0.978916	-0.891233	-0.709449	-0.449232	-0.185968	0.0690807	0.222206	0.286501
-1.98998	-1.91898	-1.73429	-1.44904	-1.14155	-0.892818	-0.741635	-0.607966	-0.493741	-0.394441	-0.292534	-0.182974	-0.0719178	0.0838722	0.225174	0.380213	0.556841	0.718824	0.908566	1.07656	1.18676	1.22419	1.16109	0.980273	0.756039	0.519135	0.293164	0.133062	-0.0600224	-0.373721	-0.762635	-1.17413	-1.45779	-1.56086	-1.53509	-1.39623	-1.16025	-0.911425	-0.67348	-0.466038	-0.312734	-0.206632	-0.141014	-0.10624	-0.109405	-0.156565	-0.222358	-0.247206	-0.25667	-0.276358
-1.30178	-1.4028	-1.5139	-1.59902	-1.69355	-1.79567	-1.9051	-1.94772	-1.88555	-1.7044	-1.39609	-1.00174	-0.62218	-0.361003	-0.248135	-0.272434	-0.318601	-0.311125	-0.246844	-0.222306	-0.26463	-0.370977	-0.514281	-0.65275	-0.788255	-0.857065	-0.935852	-1.02784	-1.13594	-1.21656	-1.28441	-1.29589	-1.28761	-1.2635	-1.22762	-1.18783	-1.14064	-1.05448	-1.01192	-1.02727	-1.03275	-1.05451	-1.04853	-1.02046	-1.00646	-1.00506	-1.00699	-0.977346	-0.902814	-0.812608
0.708718	0.442173	0.136824	-0.13747	-0.306212	-0.364886	-0.3993	-0.438164	-0.510857	-0.596396	-0.6354	-0.620938	-0.589907	-0.557908	-0.552175	-0.537524	-0.503879	-0.45759	-0.396436	-0.359395	-0.346731	-0.330675	-0.272978	-0.199854	-0.099597	-0.0330893	-0.0153183	-0.0592123	-0.108012	-0.144463	-0.119885	-0.0570386	-0.0148855	-0.038228	-0.120225	-0.218315	-0.281664	-0.223191	-0.0671704	0.193539	0.43568	0.59197	0.623273	0.557601	0.471618	0.406514	0.388151	0.39885	0.438752	0.450201
0.353504	0.456537	0.577076	0.622858	0.640724	0.644585	0.659661	0.658398	0.616388	0.566204	0.524413	0.554072	0.596537	0.633014	0.621497	0.550664	0.416345	0.311109	0.222454	0.145518	0.130253	0.11782	0.0845914	-0.052701	-0.280902	-0.514659	-0.668474	-0.704077	-0.645512	-0.54342	-0.535921	-0.654434	-0.826635	-0.974076	-1.02944	-0.97543	-0.845982	-0.667629	-0.481414	-0.339236	-0.269043	-0.303206	-0.465773	-0.67807	-0.882954	-1.07316	-1.23348	-1.39399	-1.55887	-1.68475
-0.656301	-0.596324	-0.553995	-0.422262	-0.235617	0.00265126	0.199843	0.286866	0.206565	-0.068589	-0.391347	-0.688867	-0.916213	-1.10888	-1.26526	-1.38422	-1.44944	-1.51658	-1.53219	-1.50219	-1.43471	-1.42379	-1.47129	-1.60866	-1.76683	-1.91045	-2.02051	-2.06962	-2.12304	-2.14621	-2.20246	-2.27648	-2.3654	-2.43301	-2.45405	-2.3958	-2.26254	-2.00071	-1.6948	-1.47887	-1.39551	-1.41398	-1.51977	-1.63182	-1.76398	-1.84153	-1.89479	-1.92744	-1.91436	-1.85484
1.57825	1.63762	1.62531	1.52516	1.34951	1.15752	1.05008	1.0091	1.08935	1.24308	1.35583	1.3825	1.32304	1.11719	0.858466	0.611865	0.44999	0.410787	0.387722	0.354575	0.330998	0.304881	0.252852	0.222243	0.211851	0.232511	0.307097	0.405078	0.600461	0.945518	1.29457	1.51522	1.51767	1.29071	0.922185	0.619988	0.491128	0.517349	0.646769	0.731115	0.74493	0.691291	0.548617	0.318574	0.0986236	-0.0759192	-0.103077	0.0195626	0.258576	0.540899
0.495083	0.341833	0.154009	0.0320798	-0.0035788	0.000978229	0.0785977	0.185579	0.256665	0.266088	0.248447	0.152649	0.0809819	0.0360066	0.0956335	0.220414	0.283188	0.244319	0.126489	-0.0108373	-0.0338885	0.0700387	0.239355	0.303017	0.250242	0.137352	0.0534695	-0.0138306	-0.104555	-0.21292	-0.362976	-0.509794	-0.652858	-0.719653	-0.75573	-0.780128	-0.871164	-0.97377	-1.0261	-1.00676	-0.845764	-0.606872	-0.396816	-0.268953	-0.25832	-0.286251	-0.252934	-0.128619	0.0867704	0.254141
-0.462427	-0.242014	-0.00462068	0.175285	0.206143	0.146055	-0.0261016	-0.187238	-0.286489	-0.25104	-0.0527379	0.240461	0.54001	0.720555	0.69666	0.461824	0.174466	-0.0222304	-0.0107921	0.134774	0.261751	0.285569	0.178704	-0.0633245	-0.323213	-0.555709	-0.735651	-0.837941	-0.939638	-1.01072	-1.00788	-0.960743	-0.833793	-0.633107	-0.458831	-0.394067	-0.475151	-0.654247	-0.737801	-0.709141	-0.522238	-0.265747	-0.0517406	0.0738347	0.0311819	-0.199217	-0.586644	-0.976264	-1.24683	-1.34734
1.13866	1.06672	0.926179	0.785951	0.680253	0.622288	0.636959	0.708894	0.794537	0.807254	0.770286	0.656809	0.454717	0.192827	-0.0566165	-0.218918	-0.294956	-0.340168	-0.373301	-0.390289	-0.475024	-0.597188	-0.722451	-0.772614	-0.760807	-0.712663	-0.729677	-0.836959	-1.02357	-1.24176	-1.45886	-1.60586	-1.62349	-1.52692	-1.41207	-1.30393	-1.19004	-1.01501	-0.78608	-0.599998	-0.521662	-0.628483	-0.860557	-1.11049	-1.3049	-1.47837	-1.62978	-1.79756	-1.95255	-2.0653
-1.18516	-1.19882	-1.22635	-1.22139	-1.18844	-1.18553	-1.19515	-1.19388	-1.14715	-1.00127	-0.815128	-0.678009	-0.591373	-0.615812	-0.70029	-0.829263	-0.975366	-1.10696	-1.17863	-1.17605	-1.10266	-0.928061	-0.733433	-0.515091	-0.333157	-0.234614	-0.216213	-0.295049	-0.381674	-0.449095	-0.4838	-0.510614	-0.570594	-0.714593	-0.858401	-0.988314	-1.06965	-1.15256	-1.32165	-1.47671	-1.55447	-1.46048	-1.22798	-0.928091	-0.688411	-0.542997	-0.553702	-0.622049	-0.725012	-0.890394
0.303181	0.149061	-0.0207804	-0.152467	-0.250634	-0.293043	-0.282412	-0.228435	-0.203912	-0.233187	-0.270075	-0.317052	-0.373462	-0.448587	-0.527838	-0.612473	-0.711389	-0.803993	-0.911726	-1.05773	-1.20738	-1.335	-1.3616	-1.32752	-1.24189	-1.15953	-1.0912	-1.01098	-0.910204	-0.832631	-0.778083	-0.797909	-0.927723	-1.13104	-1.40256	-1.62852	-1.7358	-1.73434	-1.63216	-1.49173	-1.40475	-1.33699	-1.23336	-1.11481	-0.994334	-0.998754	-1.0827	-1.18929	-1.31077	-1.40999
-0.205712	-0.23773	-0.248789	-0.208298	-0.123761	0.0323234	0.229587	0.389405	0.500207	0.541501	0.503381	0.377254	0.222867	0.0712341	0.000923436	-0.0165567	0.0434819	0.0646417	0.00388601	-0.135983	-0.277833	-0.322059	-0.297635	-0.208936	-0.119129	-0.0584982	-0.0818727	-0.14625	-0.261182	-0.383726	-0.537492	-0.722093	-0.863893	-0.863775	-0.701484	-0.438447	-0.236363	-0.192269	-0.282995	-0.392988	-0.408763	-0.342692	-0.280615	-0.315435	-0.423536	-0.530507	-0.481603	-0.300005	-0.0163141	0.207138
0.104941	-0.0964462	-0.318605	-0.621711	-0.910946	-1.11651	-1.24283	-1.23327	-1.08582	-0.851956	-0.592143	-0.442303	-0.408767	-0.480379	-0.575064	-0.650528	-0.693627	-0.726977	-0.80678	-0.954566	-1.15418	-1.33654	-1.53672	-1.68715	-1.79796	-1.82261	-1.82769	-1.81329	-1.75205	-1.64802	-1.55878	-1.50842	-1.46285	-1.4659	-1.47173	-1.44396	-1.42492	-1.50797	-1.70872	-2.04636	-2.41145	-2.66862	-2.78845	-2.73668	-2.5793	-2.42616	-2.32143	-2.21366	-2.1088	-1.92655
1.50848	1.30283	1.08636	0.962513	0.945167	1.04153	1.12086	1.12165	0.963755	0.734879	0.52544	0.407756	0.442412	0.593879	0.783362	0.92277	0.984035	0.997539	0.990835	0.940161	0.843334	0.745216	0.612586	0.435213	0.241495	0.0811736	-0.0690529	-0.201066	-0.280563	-0.308376	-0.316229	-0.354396	-0.383024	-0.389449	-0.364614	-0.299127	-0.153407	0.0330069	0.186011	0.301452	0.376744	0.473461	0.541859	0.670207	0.823175	0.955987	1.05651	1.06893	1.00164	0.893971
-1.2977	-1.1915	-1.06644	-0.903186	-0.782229	-0.74509	-0.741457	-0.778811	-0.810631	-0.828596	-0.792392	-0.699902	-0.564981	-0.451268	-0.389133	-0.414959	-0.486931	-0.601858	-0.752505	-0.87661	-0.954596	-1.01005	-1.06308	-1.04124	-0.983508	-0.88865	-0.781768	-0.670293	-0.58855	-0.55662	-0.619947	-0.755011	-0.896289	-1.01712	-1.08466	-1.12266	-1.14924	-1.16393	-1.175	-1.1671	-1.13091	-1.11875	-1.1176	-1.05428	-0.91403	-0.681266	-0.422351	-0.186822	-0.0596733	-0.0810909
-0.478525	-0.551982	-0.634924	-0.724509	-0.757164	-0.670668	-0.482584	-0.254526	-0.0493478	0.152256	0.259718	0.265517	0.159809	-0.0106836	-0.184971	-0.311647	-0.410011	-0.451346	-0.464638	-0.458842	-0.41254	-0.339138	-0.226465	-0.0752313	0.0313819	0.145137	0.206184	0.24179	0.287258	0.345253	0.448889	0.55822	0.64769	0.70294	0.676997	0.543006	0.378423	0.190636	0.0946644	0.0424903	0.0966364	0.210686	0.36336	0.520665	0.688422	0.818159	0.878949	0.890632	0.776334	0.649132
-0.0812968	-0.00195014	0.0499222	0.0503248	-0.0641114	-0.253184	-0.459344	-0.606979	-0.646157	-0.58516	-0.455224	-0.323252	-0.173377	-0.0423753	0.0883886	0.186062	0.264535	0.293552	0.281511	0.234889	0.135291	0.0464372	-0.0209678	-0.0472834	-0.0801679	-0.139047	-0.281481	-0.520917	-0.85866	-1.2846	-1.64387	-1.81684	-1.72464	-1.41221	-1.03383	-0.713211	-0.532927	-0.496877	-0.567513	-0.707522	-0.903715	-1.12758	-1.31899	-1.44387	-1.50215	-1.54743	-1.63084	-1.7647	-1.91973	-2.03518
-0.367965	-0.342505	-0.309029	-0.282232	-0.289195	-0.37209	-0.528987	-0.703882	-0.855831	-0.943238	-0.923059	-0.826274	-0.644291	-0.4563	-0.281195	-0.193715	-0.210513	-0.245127	-0.27985	-0.288168	-0.349941	-0.468932	-0.628595	-0.744936	-0.805525	-0.86883	-1.00644	-1.23994	-1.46076	-1.62922	-1.74682	-1.88316	-2.03623	-2.11671	-2.04075	-1.76806	-1.44703	-1.18783	-1.01454	-0.950064	-0.992959	-1.17282	-1.50473	-1.91331	-2.3342	-2.63681	-2.76094	-2.74418	-2.61985	-2.44867
-1.08938	-0.956291	-0.708199	-0.451556	-0.18769	0.0259635	0.277667	0.54393	0.793598	0.980711	1.08885	1.20209	1.30422	1.33004	1.23488	1.06359	0.834238	0.557137	0.344981	0.177529	0.0869626	-0.0183689	-0.135519	-0.261224	-0.397194	-0.569825	-0.826569	-1.13557	-1.3784	-1.42486	-1.22849	-0.876587	-0.460309	-0.104415	0.0857154	0.135209	0.0327859	-0.16108	-0.392361	-0.604014	-0.692101	-0.645472	-0.510389	-0.277279	-0.0467158	0.190846	0.397364	0.585189	0.705832	0.795719
1.2573	1.21582	1.21639	1.27648	1.36942	1.45908	1.49113	1.38501	1.12217	0.792348	0.536762	0.377607	0.349673	0.395208	0.462337	0.488739	0.463929	0.34492	0.196625	0.0380355	-0.112092	-0.230079	-0.267463	-0.257864	-0.227056	-0.216398	-0.200085	-0.157206	-0.0801879	-0.0276155	0.0274735	0.00336988	-0.0514256	-0.0565555	0.0161421	0.144482	0.271322	0.356634	0.438117	0.512516	0.636252	0.766979	0.873716	0.876094	0.840229	0.792104	0.713336	0.543813	0.303651	0.0773487
0.43106	0.0768507	-0.250753	-0.594063	-0.878974	-1.06087	-1.17041	-1.22065	-1.23388	-1.23819	-1.2833	-1.26989	-1.2787	-1.23316	-1.21282	-1.22557	-1.29832	-1.38858	-1.46149	-1.46033	-1.43431	-1.42605	-1.44976	-1.57195	-1.74137	-2.00978	-2.33456	-2.61993	-2.79044	-2.81612	-2.70033	-2.54925	-2.43207	-2.35536	-2.327	-2.30776	-2.29191	-2.29871	-2.38006	-2.48627	-2.59374	-2.58547	-2.4521	-2.23359	-2.0712	-2.04085	-2.1789	-2.40969	-2.63078	-2.7692
1.05052	1.08363	1.05442	0.98233	0.875155	0.682391	0.433171	0.181787	-0.0589227	-0.129213	-0.124965	-0.00490919	0.160943	0.323541	0.375233	0.187841	-0.136802	-0.537163	-0.844796	-1.095	-1.19969	-1.15366	-0.986037	-0.786196	-0.628179	-0.587787	-0.699213	-0.8616	-1.03204	-1.1387	-1.16078	-1.06818	-0.872062	-0.753825	-0.811236	-0.970989	-1.11564	-1.17201	-1.10137	-0.951149	-0.828349	-0.678291	-0.552254	-0.488488	-0.53622	-0.683892	-0.946839	-1.18272	-1.44353	-1.6833
-0.908656	-0.909844	-0.902756	-0.865699	-0.783793	-0.705577	-0.698363	-0.806005	-0.95376	-1.03736	-0.973765	-0.830971	-0.73927	-0.740906	-0.900455	-1.20001	-1.51572	-1.70874	-1.72802	-1.62941	-1.44205	-1.27079	-1.14819	-1.11082	-1.17766	-1.3091	-1.53712	-1.74497	-1.85176	-1.82294	-1.74103	-1.75	-1.97705	-2.36469	-2.82922	-3.19411	-3.30428	-3.17129	-2.87546	-2.44511	-1.96986	-1.41462	-0.8891	-0.468471	-0.193417	-0.135555	-0.273577	-0.482285	-0.61225	-0.674112
0.0591062	-0.00813584	-0.109005	-0.240654	-0.374414	-0.490148	-0.540937	-0.504736	-0.466346	-0.412938	-0.385551	-0.427178	-0.534725	-0.683474	-0.844015	-0.981924	-1.10881	-1.2365	-1.30793	-1.32237	-1.25056	-1.10755	-0.969692	-0.819609	-0.708755	-0.614071	-0.524467	-0.515663	-0.609146	-0.774618	-0.957703	-1.08542	-1.13451	-1.13169	-1.08576	-1.02239	-0.955923	-0.938891	-0.961747	-1.02845	-1.07981	-1.12996	-1.08025	-0.979302	-0.838159	-0.725442	-0.704319	-0.760108	-0.821996	-0.842596
-0.351963	-0.244854	-0.193682	-0.171374	-0.168182	-0.149718	-0.123231	-0.104423	-0.108773	-0.126913	-0.149089	-0.215587	-0.25693	-0.340804	-0.399305	-0.476451	-0.536222	-0.49997	-0.410113	-0.22274	-0.0617982	-0.0103954	-0.105229	-0.231083	-0.369771	-0.455035	-0.53367	-0.629091	-0.674595	-0.697073	-0.654313	-0.686348	-0.858155	-1.1273	-1.37876	-1.53744	-1.53968	-1.3775	-1.23882	-1.16889	-1.20633	-1.28559	-1.36759	-1.35001	-1.15653	-0.761044	-0.26411	0.173361	0.473048	0.539197
0.487175	0.476873	0.461872	0.34883	0.2118	0.041227	-0.140766	-0.268237	-0.311721	-0.251815	-0.112717	0.0323815	0.129004	0.147429	0.0630062	-0.0575984	-0.165115	-0.247535	-0.346445	-0.438112	-0.451862	-0.390577	-0.315613	-0.307361	-0.402667	-0.636607	-0.918522	-1.1783	-1.33797	-1.4142	-1.42636	-1.39171	-1.32413	-1.29048	-1.33459	-1.44215	-1.50536	-1.53021	-1.55066	-1.50065	-1.44579	-1.42109	-1.409	-1.36421	-1.34352	-1.36482	-1.43352	-1.54074	-1.68827	-1.87499
0.546078	0.484798	0.412895	0.341354	0.279539	0.238118	0.167249	0.077991	-0.0323706	-0.124116	-0.229447	-0.338178	-0.464575	-0.538835	-0.54761	-0.497316	-0.398811	-0.300399	-0.237962	-0.233141	-0.312032	-0.466063	-0.632703	-0.742929	-0.80709	-0.807712	-0.796201	-0.781988	-0.75656	-0.730468	-0.714305	-0.671917	-0.609204	-0.560741	-0.542908	-0.573276	-0.642305	-0.698047	-0.734387	-0.744069	-0.71048	-0.655195	-0.609149	-0.574435	-0.586067	-0.614831	-0.593093	-0.520706	-0.419003	-0.393756
-0.546914	-0.518455	-0.476569	-0.419356	-0.372449	-0.322855	-0.354351	-0.425787	-0.599917	-0.735054	-0.825531	-0.86953	-0.817249	-0.717654	-0.50584	-0.272827	-0.096717	-0.0739488	-0.208888	-0.435693	-0.614644	-0.697031	-0.673658	-0.616051	-0.604624	-0.706532	-0.905387	-1.18364	-1.48976	-1.71949	-1.83518	-1.84041	-1.76696	-1.65301	-1.59777	-1.6302	-1.72345	-1.83541	-1.91462	-1.89336	-1.82366	-1.77531	-1.75964	-1.72206	-1.57233	-1.32806	-1.07198	-0.926285	-1.02843	-1.3793
0.0446362	0.0941542	0.148634	0.211105	0.262876	0.290593	0.247124	0.146732	0.0548592	-0.0488577	-0.134794	-0.244589	-0.360658	-0.464691	-0.579025	-0.694297	-0.792377	-0.838268	-0.813804	-0.752105	-0.68809	-0.623636	-0.554266	-0.424087	-0.279422	-0.118054	-0.0319712	-0.121135	-0.441374	-0.860477	-1.23041	-1.46619	-1.54369	-1.51321	-1.45791	-1.43645	-1.49278	-1.58232	-1.58882	-1.56385	-1.50135	-1.51712	-1.63874	-1.75877	-1.85552	-1.79531	-1.60768	-1.43857	-1.3414	-1.29413
-0.120032	-0.0807049	-0.0312037	0.0531692	0.155184	0.208021	0.193167	0.0646681	-0.0942812	-0.195543	-0.214613	-0.172066	-0.123859	-0.0937244	-0.112277	-0.161386	-0.143152	-0.0626197	0.0093546	-0.00801793	-0.12622	-0.298363	-0.491897	-0.625192	-0.741532	-0.868351	-1.03293	-1.18823	-1.28772	-1.33548	-1.37838	-1.4287	-1.49386	-1.51865	-1.42751	-1.20309	-0.909066	-0.659234	-0.534823	-0.493117	-0.477716	-0.461119	-0.484212	-0.54283	-0.639428	-0.769639	-0.870256	-0.933814	-0.966149	-0.981083
-0.239623	-0.205236	-0.184255	-0.208652	-0.311929	-0.420283	-0.516792	-0.508998	-0.392218	-0.251283	-0.112277	-0.013422	0.000603075	0.00558595	-0.0371728	-0.0708501	-0.0479364	0.0359947	0.0701348	-0.0179151	-0.250535	-0.612341	-0.971444	-1.23915	-1.36202	-1.374	-1.27598	-1.15271	-1.04112	-1.01157	-1.07573	-1.1756	-1.26282	-1.32178	-1.31204	-1.28574	-1.25938	-1.20362	-1.12786	-0.990747	-0.820999	-0.603307	-0.435761	-0.384055	-0.477492	-0.695262	-0.980122	-1.22981	-1.37123	-1.35851
0.672415	0.507094	0.394517	0.337303	0.328519	0.330767	0.322038	0.32529	0.350697	0.432176	0.539723	0.709591	0.859943	0.942357	0.958787	0.846283	0.613202	0.348892	0.106152	-0.0509516	-0.19119	-0.310297	-0.413288	-0.477907	-0.502501	-0.449181	-0.320938	-0.225264	-0.192304	-0.153021	-0.0801494	0.0424422	0.200086	0.35503	0.482063	0.581941	0.664947	0.779096	0.895334	1.00743	1.09672	1.14055	1.13031	1.00587	0.814489	0.623885	0.596887	0.759537	1.0389	1.26527
-0.783523	-0.789733	-0.769457	-0.774787	-0.800816	-0.811889	-0.855353	-0.788803	-0.691086	-0.528117	-0.424525	-0.416306	-0.502644	-0.561323	-0.578683	-0.514124	-0.433071	-0.361499	-0.292641	-0.271628	-0.301815	-0.32352	-0.38062	-0.39938	-0.421221	-0.353988	-0.271644	-0.216587	-0.220737	-0.3103	-0.497821	-0.7429	-1.03637	-1.30258	-1.47126	-1.53981	-1.44943	-1.20119	-0.840015	-0.4151	-0.0650214	0.142999	0.179224	0.166368	0.0608795	-0.0827848	-0.248991	-0.418784	-0.558065	-0.692569
-0.583771	-0.458593	-0.359217	-0.329708	-0.347727	-0.455014	-0.553975	-0.64016	-0.630727	-0.572745	-0.466296	-0.400768	-0.38972	-0.37984	-0.364356	-0.344046	-0.364718	-0.408307	-0.490759	-0.546474	-0.583495	-0.589649	-0.59569	-0.629543	-0.714713	-0.871302	-1.05814	-1.24252	-1.4273	-1.58336	-1.72477	-1.87248	-1.99881	-2.03661	-1.97148	-1.82415	-1.59836	-1.35402	-1.12514	-0.993559	-0.975547	-1.11053	-1.35319	-1.6702	-1.9686	-2.23473	-2.46326	-2.61504	-2.7525	-2.91686
-0.0206918	-0.051532	-0.132255	-0.231961	-0.358639	-0.444742	-0.396217	-0.225204	-0.0584343	0.0109421	-0.0155731	-0.179514	-0.351666	-0.412375	-0.361091	-0.189714	0.0112619	0.184783	0.237034	0.207668	0.0959384	-0.019373	-0.162565	-0.364302	-0.538737	-0.659993	-0.668028	-0.568374	-0.422006	-0.232775	-0.0978234	-0.0430188	-0.0806609	-0.150567	-0.212243	-0.264331	-0.250465	-0.198295	-0.17037	-0.223664	-0.254564	-0.212012	-0.048049	0.153941	0.296758	0.288881	0.0933092	-0.253476	-0.640799	-0.904817
-1.34333	-1.30548	-1.21305	-1.11135	-0.991909	-0.865553	-0.702588	-0.596459	-0.610263	-0.696437	-0.74453	-0.771508	-0.689857	-0.499824	-0.259216	-0.00706072	0.187295	0.309829	0.338742	0.33988	0.323446	0.338489	0.393616	0.41703	0.377157	0.240318	0.00251947	-0.288394	-0.484845	-0.529165	-0.437485	-0.281268	-0.168931	-0.195783	-0.288909	-0.428633	-0.517125	-0.531251	-0.508155	-0.449937	-0.398791	-0.361613	-0.342765	-0.365533	-0.460698	-0.510595	-0.52873	-0.500914	-0.434935	-0.377169
-0.252776	-0.23963	-0.297327	-0.457291	-0.718737	-1.01223	-1.26988	-1.46237	-1.4654	-1.30864	-1.05274	-0.78735	-0.577258	-0.356366	-0.165015	-0.0110956	0.120777	0.180195	0.155488	0.0824045	-0.0401001	-0.161582	-0.259513	-0.321474	-0.332867	-0.368398	-0.406658	-0.509804	-0.60428	-0.638981	-0.606499	-0.519102	-0.39227	-0.315557	-0.326925	-0.420399	-0.560804	-0.67173	-0.749771	-0.717371	-0.596492	-0.422474	-0.173655	0.0818292	0.26568	0.271923	0.115934	-0.132812	-0.372039	-0.455903
0.632168	0.471745	0.303079	0.142619	-0.0127174	-0.126036	-0.193074	-0.227636	-0.257342	-0.349468	-0.487651	-0.635224	-0.753919	-0.8013	-0.792698	-0.718359	-0.662921	-0.606706	-0.578886	-0.615738	-0.70753	-0.801209	-0.844959	-0.793328	-0.584035	-0.305644	-0.024376	0.128687	0.1103	-0.0647086	-0.291903	-0.4617	-0.528765	-0.514788	-0.464706	-0.342863	-0.192674	-0.00225304	0.181294	0.284301	0.266663	0.183339	0.0895629	0.0544132	-0.0106602	-0.115969	-0.253971	-0.369038	-0.400739	-0.305408
0.548446	0.673233	0.723587	0.620217	0.454439	0.328778	0.270843	0.278949	0.355504	0.377332	0.382017	0.360652	0.37947	0.391344	0.348565	0.213557	0.0373576	-0.0856461	-0.117246	-0.0117758	0.206727	0.524373	0.808079	0.999067	1.01737	0.957894	0.84202	0.758964	0.74033	0.718644	0.695093	0.638068	0.557486	0.531641	0.528959	0.513434	0.524155	0.556115	0.512462	0.398172	0.20205	-0.0121519	-0.164228	-0.244064	-0.187905	-0.0693944	0.0645086	0.131681	0.151696	0.13226
-0.0483677	0.136093	0.245163	0.35456	0.45999	0.503802	0.448374	0.304983	0.094911	-0.15967	-0.360479	-0.479731	-0.530018	-0.581272	-0.610724	-0.568447	-0.461346	-0.283429	-0.0433144	0.191082	0.385079	0.547464	0.606937	0.556998	0.431352	0.192098	-0.0707596	-0.193316	-0.197163	-0.0579724	0.0779697	0.19927	0.286228	0.284406	0.161913	-0.0687454	-0.322199	-0.549121	-0.649786	-0.620677	-0.52494	-0.424425	-0.340052	-0.2657	-0.210066	-0.0999323	-0.0115653	0.021043	0.0243601	0.0186182
0.209265	0.17708	0.168209	0.262481	0.456825	0.730459	0.994151	1.2284	1.33536	1.29175	1.11499	0.795305	0.453621	0.151019	-0.101652	-0.273252	-0.386694	-0.452175	-0.499825	-0.519215	-0.51874	-0.439723	-0.265524	0.0231415	0.312151	0.475294	0.490772	0.406829	0.323444	0.30641	0.361296	0.382865	0.313791	0.190004	0.116255	0.132025	0.145331	0.121531	0.0104162	-0.178985	-0.370453	-0.467821	-0.477701	-0.418864	-0.320614	-0.235192	-0.211061	-0.307296	-0.414234	-0.50496
-0.423161	-0.450792	-0.448231	-0.480533	-0.508959	-0.437038	-0.252403	0.0251474	0.360487	0.645742	0.820888	0.840443	0.717464	0.571658	0.436214	0.342675	0.295463	0.284778	0.309106	0.318877	0.313327	0.215619	0.0796548	-0.0451212	-0.105995	-0.115169	-0.0318877	0.0321253	0.0573597	0.087443	0.151936	0.29935	0.420517	0.42625	0.264248	0.0213027	-0.258595	-0.390736	-0.4284	-0.326849	-0.155063	0.0402991	0.220875	0.331833	0.355889	0.277784	0.113932	-0.0857806	-0.172082	-0.129016
0.560543	0.339671	0.109672	-0.0618595	-0.14935	-0.165387	-0.148778	-0.0641516	0.067403	0.15705	0.151103	0.0231488	-0.185218	-0.415234	-0.53111	-0.487598	-0.349531	-0.223857	-0.178064	-0.243458	-0.327328	-0.367307	-0.308285	-0.17913	-0.0612206	0.0458996	0.0710236	-0.00365855	-0.139636	-0.250568	-0.312911	-0.320052	-0.250969	-0.119373	0.0945527	0.20464	0.171121	-0.0460883	-0.280745	-0.423269	-0.358718	-0.182439	-0.035673	-0.0271944	-0.0910665	-0.186573	-0.189549	-0.112137	0.0484881	0.195653
1.25033	1.22805	1.17128	1.08633	1.00902	0.873863	0.675332	0.481041	0.253908	0.0817912	-0.0733361	-0.184718	-0.179499	-0.153356	-0.105051	0.0231898	0.173456	0.345336	0.432936	0.377846	0.235891	0.0297953	-0.122808	-0.107464	0.0114259	0.15461	0.22697	0.154075	-0.0951232	-0.423823	-0.708121	-0.914184	-0.952629	-0.81514	-0.509414	-0.255116	-0.179929	-0.304726	-0.525615	-0.652714	-0.640535	-0.528782	-0.460325	-0.45911	-0.444593	-0.403114	-0.320313	-0.200825	-0.140429	-0.209771
-0.501737	-0.532545	-0.582027	-0.599994	-0.575494	-0.493244	-0.445786	-0.455571	-0.525846	-0.518682	-0.460868	-0.388483	-0.389453	-0.493136	-0.604881	-0.669223	-0.531305	-0.269566	-0.0545494	0.0627353	0.0908586	0.0983098	0.0979828	0.107322	0.0541698	-0.036707	-0.0727277	-0.000933141	0.159263	0.309644	0.392974	0.382839	0.353642	0.353734	0.473272	0.603596	0.682062	0.645127	0.495634	0.315731	0.151013	0.00411789	-0.0730813	-0.0629946	0.00338208	0.0136517	-0.0705562	-0.214867	-0.307319	-0.214096
1.39049	1.17979	0.886261	0.583647	0.287503	0.132725	0.139908	0.263784	0.418603	0.468175	0.399405	0.234812	0.0267298	-0.170837	-0.245972	-0.176115	-0.0132289	0.208542	0.417885	0.493041	0.397959	0.268202	0.198498	0.206756	0.292679	0.339421	0.378095	0.387275	0.388417	0.390288	0.38356	0.392835	0.397744	0.400281	0.36783	0.254393	0.0800729	-0.104534	-0.211205	-0.206992	-0.0559928	0.209811	0.518653	0.710079	0.775525	0.778506	0.801738	0.847381	0.928559	1.00678
-0.425382	-0.199889	0.107181	0.420444	0.634926	0.692566	0.615431	0.498965	0.377565	0.274642	0.125942	0.0157921	-0.096322	-0.145574	-0.111522	-0.0806911	-0.017248	0.0147351	0.00871138	-0.0515977	-0.134499	-0.185408	-0.180629	-0.156282	-0.111001	-0.0168655	0.0934659	0.223857	0.396618	0.565237	0.753149	0.849374	0.838088	0.665245	0.388914	0.136208	-0.0165467	-0.0230956	0.0120522	0.0364874	0.0173275	0.00208489	-0.0362587	-0.0321817	-0.0272247	-0.0158908	-0.0161025	-0.0346176	-0.115078	-0.150035
0.766224	0.58226	0.413019	0.298892	0.260579	0.31601	0.364884	0.359541	0.277815	0.179802	0.106546	0.177239	0.357049	0.575718	0.712348	0.728623	0.595332	0.371594	0.130994	-0.0459575	-0.14	-0.0943787	0.128756	0.407554	0.696741	0.817417	0.755744	0.531511	0.242021	0.0715262	0.122939	0.371254	0.706444	0.933295	0.960624	0.767004	0.422505	0.0361895	-0.325928	-0.616691	-0.822026	-0.958495	-1.03646	-1.03429	-1.03225	-1.0341	-1.00373	-0.947399	-0.880107	-0.786182
0.743966	0.776438	0.708997	0.519584	0.259316	0.0303664	-0.0869585	-0.00283891	0.248503	0.570611	0.830042	0.961871	0.965241	0.83423	0.657034	0.54937	0.560212	0.651322	0.768844	0.910423	0.939934	0.832665	0.628364	0.444107	0.283863	0.178064	0.105088	0.063714	0.01006	-0.0408479	-0.0358532	0.0566979	0.171527	0.332608	0.448852	0.469584	0.416577	0.341538	0.34645	0.463227	0.68677	0.904978	0.928908	0.725083	0.417783	0.126834	0.0602447	0.210324	0.502526	0.785742
0.361623	0.44411	0.537924	0.599457	0.593389	0.482819	0.304117	0.165558	0.0903693	0.0339184	-0.0411905	-0.116969	-0.186962	-0.233019	-0.20591	-0.136628	-0.0550851	0.0247915	0.108838	0.187156	0.232204	0.182145	0.0817643	-0.0328071	-0.135842	-0.245164	-0.299245	-0.297059	-0.17627	-0.0139566	0.175644	0.299503	0.320791	0.255788	0.105463	-0.066048	-0.254123	-0.395789	-0.444671	-0.353511	-0.145531	0.119211	0.366093	0.494397	0.521972	0.476595	0.412589	0.307244	0.177111	0.0507757
-0.209941	-0.281473	-0.423162	-0.568078	-0.703525	-0.772686	-0.766705	-0.670066	-0.55133	-0.434279	-0.297397	-0.181581	-0.0268493	0.106705	0.124928	0.0171606	-0.0767617	-0.0838696	0.0292955	0.130189	0.162318	0.133531	0.0550612	-0.00863929	-0.0628649	-0.120947	-0.232558	-0.385121	-0.453033	-0.390395	-0.186198	-0.00384111	0.0684661	0.0198351	-0.0880913	-0.197502	-0.2509	-0.222955	-0.257998	-0.38841	-0.527585	-0.58804	-0.543422	-0.421312	-0.213655	-0.0357922	0.158695	0.250167	0.287661	0.223638
-0.709215	-0.745124	-0.763395	-0.752629	-0.665655	-0.589591	-0.560857	-0.612308	-0.681671	-0.761418	-0.792332	-0.708052	-0.536361	-0.319763	-0.108259	0.0824894	0.264195	0.421943	0.543196	0.629495	0.60397	0.443059	0.16326	-0.103199	-0.267044	-0.317412	-0.267801	-0.145046	-0.0201807	0.072042	0.105995	0.0882559	0.0676507	0.024392	0.0437311	0.0320096	-0.0475245	-0.206821	-0.378332	-0.546625	-0.59969	-0.607647	-0.577351	-0.575639	-0.625958	-0.658084	-0.640188	-0.47169	-0.276103	-0.119814
0.888388	0.995833	1.12587	1.198	1.21497	1.04759	0.706612	0.258445	-0.112329	-0.251887	-0.131582	0.0488246	0.189124	0.140767	-0.0439361	-0.29905	-0.461147	-0.492824	-0.405073	-0.24379	-0.0239079	0.294573	0.593806	0.971331	1.33385	1.60188	1.60724	1.37651	0.991231	0.514991	0.0764774	-0.180883	-0.195965	-0.015373	0.265994	0.530639	0.678493	0.688688	0.604632	0.460414	0.301971	0.230272	0.235746	0.225426	0.223592	0.247578	0.320014	0.466081	0.636216	0.771877
-0.273851	-0.131463	0.050943	0.149732	0.233109	0.404117	0.651096	0.90893	1.07582	1.06663	0.851955	0.48652	0.0605051	-0.296618	-0.602486	-0.781162	-0.871584	-0.812561	-0.633502	-0.37241	-0.124651	0.061493	0.145756	0.196711	0.210622	0.1589	0.0804784	0.00473904	-0.110834	-0.199159	-0.310078	-0.364937	-0.32356	-0.146222	0.106766	0.344487	0.540614	0.589516	0.590611	0.566136	0.518955	0.433673	0.292902	0.0544805	-0.256447	-0.502455	-0.595375	-0.489408	-0.314689	-0.113787
0.748563	0.708739	0.688554	0.745365	0.841025	0.949316	1.04055	1.13957	1.26811	1.40031	1.41363	1.28111	1.05948	0.849865	0.758809	0.721744	0.692979	0.623793	0.492693	0.356091	0.293407	0.27174	0.260512	0.189427	0.125288	0.132096	0.181581	0.2775	0.359412	0.467238	0.544161	0.591854	0.607512	0.625615	0.58867	0.548392	0.51863	0.451072	0.369537	0.252848	0.116434	0.089181	0.186454	0.392243	0.625455	0.810815	0.899081	0.930768	0.883483	0.770799
0.388754	0.299102	0.292792	0.38088	0.566787	0.740889	0.947156	1.00154	1.01748	1.03577	0.979255	0.747703	0.323029	-0.227048	-0.78276	-1.16252	-1.16341	-0.825058	-0.239159	0.307854	0.626546	0.659114	0.48479	0.130733	-0.191126	-0.321038	-0.247718	-0.0661424	0.0307415	0.0172497	0.00100967	-0.0653312	-0.132885	-0.180976	-0.217589	-0.303465	-0.370846	-0.3899	-0.342279	-0.213488	0.0299108	0.34093	0.591676	0.73386	0.785859	0.809248	0.801079	0.723608	0.541463	0.476951
0.197533	0.293977	0.349059	0.378402	0.406905	0.445157	0.490316	0.513439	0.491926	0.457692	0.391327	0.359777	0.358579	0.372104	0.390973	0.390915	0.349959	0.371392	0.425174	0.533616	0.654656	0.739154	0.746268	0.6745	0.600824	0.519791	0.433644	0.303608	0.174733	0.0539883	-0.000278806	-0.0323417	-0.0197612	-0.00205257	0.0122747	0.0316205	0.120522	0.226085	0.249726	0.179896	0.000224011	-0.174875	-0.262155	-0.239484	-0.119892	0.0222596	0.137617	0.206796	0.279409	0.331444
0.436634	0.27684	0.137075	0.0912593	0.127885	0.181201	0.185881	0.14102	0.012871	-0.0692053	-0.119169	-0.0939673	-0.0142904	0.08797	0.191055	0.240191	0.220969	0.13436	0.0861786	0.113412	0.225288	0.31758	0.383825	0.379919	0.296278	0.192007	0.113296	0.118242	0.192063	0.290773	0.427397	0.579944	0.731978	0.855008	0.893301	0.819272	0.627784	0.379184	0.171974	0.121701	0.198685	0.333764	0.414469	0.406217	0.321092	0.142119	-0.109524	-0.38027	-0.548126	-0.532723
-0.901547	-0.684749	-0.417762	-0.160282	0.0699981	0.206968	0.266001	0.272652	0.292599	0.306948	0.203965	-0.0135435	-0.340669	-0.635877	-0.715907	-0.579659	-0.265757	0.174955	0.528427	0.640253	0.612045	0.554909	0.587673	0.661085	0.705088	0.631261	0.423208	0.068343	-0.202458	-0.326992	-0.304875	-0.238251	-0.185287	-0.110754	-0.0597762	-0.00999413	0.0853601	0.163165	0.208379	0.185697	0.133901	0.0205012	-0.161879	-0.345224	-0.450798	-0.41932	-0.305101	-0.123515	0.0842503	0.241246
0.0221656	-0.0906467	-0.0791748	-0.00513067	0.167355	0.36089	0.486483	0.521511	0.437421	0.350582	0.332084	0.384356	0.522715	0.703815	0.819313	0.783381	0.597499	0.419948	0.354473	0.48931	0.681033	0.811107	0.842274	0.775871	0.654913	0.546197	0.456946	0.341703	0.243128	0.178517	0.131514	0.0935803	0.0574186	0.00684324	-0.0217803	0.0258229	0.154557	0.300396	0.453442	0.568677	0.64463	0.641966	0.574486	0.432308	0.319902	0.285154	0.360018	0.508695	0.620608	0.75769
0.905123	0.971573	0.901318	0.660774	0.242001	-0.201968	-0.499376	-0.561815	-0.362169	-0.0888973	0.0808408	0.0405622	-0.205186	-0.545673	-0.83304	-0.956979	-0.909955	-0.749746	-0.578906	-0.438712	-0.338769	-0.248429	-0.233745	-0.225115	-0.222856	-0.251443	-0.247717	-0.222901	-0.215496	-0.206245	-0.16332	-0.0532103	0.152337	0.324124	0.431375	0.476862	0.455584	0.430128	0.394711	0.267219	0.0992471	-0.091569	-0.256029	-0.354916	-0.383101	-0.340492	-0.296208	-0.311525	-0.377241	-0.439138
-0.220994	-0.256739	-0.218763	-0.183069	-0.116163	-0.0208995	0.123977	0.219778	0.30659	0.291124	0.182928	0.0177851	-0.157673	-0.211391	-0.13589	0.0140617	0.230242	0.525097	0.787277	0.91105	0.83056	0.571214	0.331551	0.209354	0.212305	0.328641	0.475101	0.678455	0.840512	0.926518	0.880263	0.707443	0.45476	0.279388	0.178846	0.245049	0.315571	0.319235	0.285462	0.292894	0.35264	0.50632	0.550616	0.384679	0.0284241	-0.407622	-0.755073	-0.859279	-0.790879	-0.632423
0.122179	0.0171297	0.0108592	0.0383348	0.127904	0.211068	0.176895	0.0693853	-0.102057	-0.228809	-0.169246	-0.0251305	0.0359999	-0.0416073	-0.223613	-0.444775	-0.51256	-0.427909	-0.235779	-0.138017	-0.221665	-0.428167	-0.657511	-0.773562	-0.78869	-0.721009	-0.510779	-0.253745	-0.0903697	-0.0148532	0.000477398	-0.033502	0.0450147	0.13664	0.172542	0.104492	-0.0636912	-0.26055	-0.30257	-0.193706	0.015576	0.314842	0.582685	0.864265	1.02572	1.08373	1.00967	0.857249	0.61551	0.373222
0.155944	0.00340522	-0.0831953	-0.0985578	-0.0102387	0.101679	0.164495	0.202317	0.269039	0.398812	0.524898	0.620602	0.616476	0.443724	0.218213	0.101933	0.125951	0.235745	0.399073	0.501686	0.540809	0.503349	0.493322	0.50981	0.582841	0.642595	0.604614	0.449737	0.250904	0.12154	0.125438	0.290023	0.503435	0.700047	0.78464	0.731782	0.580919	0.388806	0.20861	0.0976491	-0.00392567	-0.0868949	-0.153925	-0.20627	-0.221905	-0.247791	-0.32148	-0.384402	-0.366546	-0.233958
0.467271	0.395588	0.355459	0.391082	0.386818	0.380158	0.291956	0.124482	-0.0519058	-0.197197	-0.274584	-0.237303	-0.137083	-0.0150952	0.160831	0.356691	0.45939	0.366017	0.175875	0.0421497	0.140306	0.369435	0.598051	0.706744	0.737179	0.751182	0.887447	1.1115	1.27761	1.27715	1.10083	0.870372	0.633758	0.461001	0.34631	0.233045	0.0665408	-0.121179	-0.260753	-0.296201	-0.177939	0.000868299	0.276621	0.540922	0.758524	0.879988	1.004	1.11952	1.2289	1.35548
-0.819422	-0.646089	-0.346002	0.00537847	0.379735	0.728035	0.955746	1.03906	0.912717	0.621825	0.28941	-0.0472486	-0.337843	-0.552031	-0.743727	-0.911788	-0.960956	-0.867855	-0.62596	-0.321145	-0.0554837	0.103918	0.212356	0.23078	0.170772	-0.0151011	-0.197819	-0.343412	-0.392175	-0.323248	-0.158211	0.121732	0.418071	0.62538	0.747437	0.76781	0.814673	0.910291	0.943025	0.797801	0.460998	0.00626078	-0.458802	-0.69985	-0.727603	-0.583228	-0.4455	-0.32431	-0.193329	-0.0945841
-0.412624	-0.290751	-0.146452	-0.028823	0.0619039	0.162069	0.233702	0.280859	0.244508	0.115909	-0.0569097	-0.230577	-0.325063	-0.379476	-0.402405	-0.476467	-0.531256	-0.565105	-0.403119	-0.0345172	0.412132	0.814537	1.00498	0.982918	0.710245	0.363794	0.00524176	-0.29107	-0.462626	-0.593428	-0.674213	-0.743278	-0.717028	-0.540472	-0.251265	0.0718036	0.288015	0.378378	0.356814	0.267645	0.142358	0.0305199	-0.0179483	0.00422794	0.0423629	0.016439	-0.123506	-0.417623	-0.751593	-0.982149
0.376249	0.357826	0.294251	0.278708	0.260944	0.307929	0.430587	0.610621	0.819178	0.954627	1.01871	1.00794	0.97014	0.902232	0.872829	0.790805	0.624458	0.428437	0.206526	0.0797123	0.0574034	0.188401	0.336077	0.376617	0.393434	0.36227	0.359769	0.377595	0.385339	0.339928	0.294652	0.244303	0.233865	0.166693	0.0411104	-0.095791	-0.259945	-0.317429	-0.296847	-0.3163	-0.311186	-0.277274	-0.120682	0.0698663	0.203941	0.265939	0.317941	0.333249	0.405873	0.491494
1.19608	0.899106	0.605726	0.341041	0.101237	-0.0257265	-0.0665727	0.0529384	0.262061	0.39841	0.403039	0.238495	-0.0494513	-0.381478	-0.63115	-0.669585	-0.56471	-0.418201	-0.301859	-0.258462	-0.272664	-0.215974	-0.121575	0.000267994	0.0613332	0.0664191	0.0695383	0.0183939	-0.056843	-0.199706	-0.388683	-0.504953	-0.47149	-0.248972	0.0376568	0.28886	0.401318	0.31923	0.174498	0.0338751	-0.0545551	0.024863	0.253537	0.504843	0.664343	0.65657	0.567972	0.4323	0.327867	0.284768
1.28537	1.32246	1.22629	0.968403	0.595435	0.232486	0.019064	-0.0203885	0.0684623	0.201959	0.282605	0.322812	0.322746	0.390772	0.464956	0.50457	0.464141	0.325915	0.15799	0.0153863	-0.0193749	0.0655055	0.2289	0.298858	0.240109	0.0947522	-0.0167955	0.00397185	0.0852065	0.154862	0.117749	-0.0376817	-0.195248	-0.333276	-0.352381	-0.257806	-0.109138	-0.00768009	0.093222	0.209668	0.4156	0.649355	0.840899	0.902621	0.798816	0.601093	0.436654	0.330009	0.249493	0.168073
-1.0192	-1.12329	-1.15313	-1.01162	-0.745892	-0.421083	-0.105901	0.154614	0.354428	0.409276	0.383902	0.261834	0.126367	0.00170295	-0.107653	-0.141037	-0.0944583	0.0444351	0.260387	0.545344	0.744709	0.839689	0.712667	0.457847	0.137847	-0.111173	-0.295748	-0.326241	-0.248882	-0.103069	0.0530891	0.0979027	0.0364512	-0.121365	-0.271378	-0.307846	-0.149683	0.0786252	0.264858	0.278592	0.139115	-0.0438388	-0.265685	-0.417614	-0.487654	-0.503829	-0.540917	-0.670275	-0.833688	-0.929388
-0.190889	-0.263095	-0.306245	-0.270768	-0.196046	-0.118897	-0.0352591	0.0610941	0.082296	0.0937743	0.165246	0.319844	0.579517	0.772714	0.905661	0.895124	0.735747	0.434034	0.141889	-0.0826788	-0.231932	-0.332398	-0.37799	-0.307866	-0.0549892	0.327448	0.658389	0.818577	0.760095	0.592688	0.446075	0.310386	0.22503	0.123994	0.0812106	0.0945066	0.158847	0.236602	0.277535	0.271149	0.204982	0.121493	0.0229009	-0.00220471	0.0648997	0.231511	0.397884	0.515445	0.498334	0.416363
0.201083	0.194395	0.164694	0.163618	0.192119	0.252735	0.303194	0.313473	0.346093	0.368939	0.477855	0.723318	0.990608	1.22546	1.22251	1.06496	0.830253	0.648928	0.564719	0.634591	0.76333	0.806386	0.777501	0.720138	0.715896	0.727966	0.744679	0.678363	0.516187	0.314704	0.0624493	-0.0221929	0.0792215	0.317505	0.579662	0.722281	0.622622	0.345737	0.0180855	-0.243632	-0.306268	-0.261711	-0.140506	-0.00487544	0.0622013	0.0301834	-0.099117	-0.199708	-0.233275	-0.175364
0.670023	0.320793	0.0235811	-0.198551	-0.287441	-0.214421	-0.0659397	0.124796	0.223828	0.193687	0.106401	0.0302758	0.0578322	0.156765	0.247473	0.19273	0.034412	-0.175424	-0.379203	-0.567501	-0.657262	-0.673562	-0.605198	-0.485338	-0.379944	-0.2899	-0.260237	-0.263243	-0.281823	-0.298141	-0.328343	-0.403165	-0.500133	-0.54462	-0.566515	-0.578308	-0.609734	-0.615161	-0.620223	-0.588261	-0.52889	-0.447345	-0.414126	-0.521489	-0.675958	-0.867539	-0.966268	-0.974456	-0.899191	-0.791895
1.04301	0.780399	0.490424	0.22628	0.0578467	0.0398621	0.112274	0.19363	0.117921	-0.133528	-0.530323	-0.929463	-1.18457	-1.24171	-1.07496	-0.817125	-0.552859	-0.382425	-0.274846	-0.311729	-0.39163	-0.457605	-0.478523	-0.478247	-0.527388	-0.546202	-0.548966	-0.537819	-0.502989	-0.417833	-0.270165	-0.0364107	0.244065	0.509609	0.685818	0.657543	0.40725	0.0305625	-0.261537	-0.344119	-0.281709	-0.150939	-0.0874793	-0.192796	-0.356438	-0.48969	-0.580718	-0.596338	-0.51161	-0.349695
0.504945	0.562231	0.5539	0.473122	0.273055	0.0505428	-0.131615	-0.164961	-0.0173706	0.213018	0.469979	0.698794	0.830269	0.806488	0.653318	0.422193	0.247396	0.147724	0.135293	0.171563	0.221559	0.252338	0.289948	0.307779	0.222427	-0.000543345	-0.313963	-0.553229	-0.681214	-0.598343	-0.303552	0.0766187	0.399388	0.517187	0.497972	0.394301	0.309583	0.236431	0.159945	0.0140601	-0.167279	-0.350183	-0.473839	-0.517529	-0.547748	-0.551761	-0.512665	-0.477124	-0.516477	-0.530519
-0.0908185	0.230674	0.389248	0.383412	0.282107	0.126465	0.0564354	0.0697439	0.177998	0.280313	0.267763	0.176587	0.0519668	-0.099897	-0.248279	-0.350625	-0.41583	-0.414422	-0.328623	-0.150344	-0.00143566	0.0342025	-0.0962832	-0.315493	-0.574609	-0.726175	-0.635887	-0.373738	-0.0121827	0.321839	0.495984	0.548373	0.441449	0.232232	-6.20332e-05	-0.21327	-0.32079	-0.28416	-0.100241	0.09493	0.182444	0.119735	0.032051	0.017258	0.115344	0.313072	0.525863	0.697436	0.727608	0.698173
-0.345909	-0.050369	0.183491	0.304319	0.278824	0.12917	-0.0636406	-0.1867	-0.295581	-0.396359	-0.490363	-0.538134	-0.501608	-0.457729	-0.44456	-0.464163	-0.576736	-0.708847	-0.837318	-0.890878	-0.841473	-0.708721	-0.583941	-0.446893	-0.372427	-0.381822	-0.505063	-0.62821	-0.737965	-0.772158	-0.706412	-0.599115	-0.452287	-0.311841	-0.221787	-0.188886	-0.18554	-0.189646	-0.221247	-0.268534	-0.325759	-0.346793	-0.3751	-0.388532	-0.49943	-0.686145	-0.904075	-1.01865	-0.997195	-0.826919
-0.853798	-1.05996	-1.14252	-1.09219	-0.939755	-0.779778	-0.707163	-0.751976	-0.900358	-1.05463	-1.16463	-1.21816	-1.21853	-1.07483	-0.858501	-0.608519	-0.405769	-0.341603	-0.414141	-0.502291	-0.543563	-0.448798	-0.316226	-0.140172	0.0484504	0.22244	0.270372	0.237264	0.0605136	-0.154784	-0.3212	-0.340641	-0.209081	-0.0190475	0.113078	0.177523	0.230685	0.184862	0.132088	0.0468116	-0.0325394	-0.118992	-0.174626	-0.184839	-0.24528	-0.369198	-0.549781	-0.652608	-0.716225	-0.69994
1.00051	1.10069	1.1327	1.1474	1.10898	1.04241	0.944432	0.82274	0.684402	0.628481	0.642992	0.742102	0.941711	1.19789	1.43979	1.59351	1.64444	1.60869	1.56643	1.53709	1.58089	1.57725	1.52583	1.3479	1.08283	0.764063	0.408261	0.102558	-0.168055	-0.322484	-0.367373	-0.263084	-0.0507149	0.17442	0.233772	0.110441	-0.113286	-0.33435	-0.368437	-0.276206	-0.153842	-0.12509	-0.245119	-0.446638	-0.597961	-0.663132	-0.630781	-0.5389	-0.401578	-0.269553
-0.0299644	-0.110518	-0.224184	-0.259517	-0.239983	-0.159904	-0.0221121	0.0889691	0.109703	0.0394389	-0.0611752	-0.184778	-0.325724	-0.522233	-0.769228	-1.01326	-1.18127	-1.23358	-1.22757	-1.22685	-1.22382	-1.19948	-1.12361	-0.920751	-0.636907	-0.387209	-0.310281	-0.419838	-0.637991	-0.840798	-0.837434	-0.694759	-0.481113	-0.298842	-0.208027	-0.260212	-0.416268	-0.571477	-0.661225	-0.627085	-0.505745	-0.407601	-0.399059	-0.470985	-0.598758	-0.759109	-0.879102	-0.918573	-0.837032	-0.672072
-0.173435	-0.101417	-0.0103847	0.00824211	0.0563071	0.127802	0.23219	0.37171	0.451794	0.458984	0.374762	0.247774	0.100591	-0.0159317	-0.130082	-0.24474	-0.298799	-0.169334	0.0717762	0.317911	0.395157	0.261613	0.0626165	-0.0430127	-0.0204446	0.0476058	0.0891174	0.0988258	0.0930879	0.140354	0.221258	0.236717	0.161145	-0.0879129	-0.305876	-0.406558	-0.374424	-0.18786	0.091156	0.392996	0.612194	0.764391	0.834432	0.866626	0.792554	0.607064	0.373324	0.184153	0.117186	0.123554
-0.657257	-0.466119	-0.321955	-0.256562	-0.286035	-0.368635	-0.443754	-0.418222	-0.295131	-0.172727	-0.0662744	0.0124141	0.0929039	0.192209	0.237045	0.23522	0.194516	0.109017	0.00457379	-0.117498	-0.201363	-0.206615	-0.0866899	0.0786687	0.175359	0.108712	-0.0445027	-0.241516	-0.395879	-0.460868	-0.405376	-0.253563	-0.0494447	0.101434	0.145915	0.0211147	-0.164064	-0.345065	-0.44028	-0.375987	-0.19561	-0.00902022	0.103941	0.150571	0.186917	0.197296	0.202624	0.188166	0.162542	0.180289
0.878292	0.895962	0.877411	0.795671	0.614241	0.419536	0.284117	0.274749	0.336433	0.332487	0.253827	0.1211	-0.000828078	-0.0914405	-0.225758	-0.37607	-0.449809	-0.301709	0.048435	0.458476	0.760527	0.9045	0.809651	0.559834	0.268276	0.0382769	-0.0531304	-0.0485684	0.0541336	0.175447	0.240019	0.175621	0.042187	-0.0436325	-0.00228664	0.099869	0.252575	0.339792	0.305461	0.209001	0.151206	0.18902	0.315252	0.389229	0.375384	0.233719	-0.00935734	-0.270927	-0.466919	-0.438863
-0.397067	-0.246931	-0.0781492	0.0509581	0.123532	0.110905	0.0347792	-0.00966178	0.0437353	0.173921	0.271411	0.292036	0.19316	0.0346264	-0.0942281	-0.108261	-0.0248466	0.128416	0.270411	0.409454	0.497946	0.500246	0.446863	0.349749	0.319272	0.375999	0.565056	0.816128	1.08709	1.20581	1.16795	0.990887	0.758864	0.572657	0.443419	0.340425	0.201597	-0.0124058	-0.278747	-0.457363	-0.553208	-0.604252	-0.606983	-0.55375	-0.435203	-0.21559	-0.050144	0.0803832	0.178839	0.19976
0.079702	0.137402	0.262725	0.532465	0.811584	1.06679	1.17326	1.11273	0.9349	0.684126	0.468894	0.352044	0.363255	0.404983	0.441441	0.409858	0.366411	0.241389	0.194982	0.243188	0.377235	0.514193	0.557361	0.499867	0.424641	0.341064	0.375473	0.409681	0.391839	0.389236	0.402165	0.479274	0.674901	1.00377	1.32698	1.47092	1.33824	0.993792	0.561001	0.234899	0.183877	0.380914	0.6546	0.896508	1.04944	1.09044	0.998247	0.911971	0.898822	0.920814
0.776452	0.658872	0.492048	0.334969	0.199196	0.129988	0.128313	0.168043	0.263539	0.374936	0.510596	0.619156	0.643957	0.589575	0.448442	0.339364	0.333755	0.488142	0.61879	0.628569	0.430175	0.161247	-0.0641851	-0.203311	-0.266519	-0.296814	-0.320778	-0.334043	-0.322603	-0.264964	-0.224695	-0.25105	-0.321113	-0.323632	-0.276981	-0.148888	0.00895452	0.199525	0.407231	0.57826	0.661056	0.604311	0.471545	0.257929	0.0713745	-0.0739239	-0.179328	-0.175204	-0.107645	0.0284785
-0.560902	-0.47332	-0.392954	-0.296208	-0.205995	-0.141729	-0.112928	-0.141422	-0.158149	-0.113023	0.0338762	0.289566	0.545289	0.70816	0.75385	0.70831	0.665257	0.630645	0.563905	0.425239	0.210415	0.057584	-0.00155191	0.0418035	0.130665	0.234215	0.313307	0.336732	0.309262	0.312207	0.335404	0.349992	0.314662	0.244639	0.166897	0.122995	0.149796	0.14557	0.0701347	-0.164249	-0.421039	-0.663316	-0.740011	-0.656886	-0.449059	-0.194963	0.0342907	0.231764	0.319001	0.33201
0.740177	0.469427	0.279841	0.242981	0.337064	0.432068	0.421644	0.275486	0.0526281	-0.131375	-0.271694	-0.368596	-0.465737	-0.565734	-0.622669	-0.635014	-0.610079	-0.583553	-0.640296	-0.722981	-0.772062	-0.746535	-0.654835	-0.504377	-0.427122	-0.377383	-0.26015	-0.0645456	0.223034	0.397635	0.390451	0.161994	-0.134626	-0.332714	-0.378204	-0.290406	-0.157397	-0.0965666	-0.200008	-0.380834	-0.539842	-0.631766	-0.59971	-0.489241	-0.312662	-0.0628771	0.223159	0.509225	0.735867	0.792176
-0.353104	-0.244144	-0.104943	-0.0284321	0.0304563	-0.0318243	-0.124535	-0.172368	-0.105593	0.0379639	0.261386	0.429661	0.491353	0.417664	0.239066	0.0966588	0.0295188	0.0148746	0.0915138	0.205013	0.292313	0.265065	0.177659	0.0281441	-0.113703	-0.254448	-0.399752	-0.522269	-0.653742	-0.679244	-0.638955	-0.573409	-0.528316	-0.555792	-0.72863	-0.968872	-1.15861	-1.19348	-1.01692	-0.839009	-0.693663	-0.724921	-0.831535	-0.933518	-0.932801	-0.835107	-0.663409	-0.485833	-0.383083	-0.329677
-0.354317	-0.313278	-0.243962	-0.197383	-0.18625	-0.256186	-0.344672	-0.408352	-0.342164	-0.189809	0.0169119	0.130078	0.0703385	-0.0960475	-0.281507	-0.415672	-0.404828	-0.240512	-0.0485306	0.0884382	0.165925	0.214246	0.354038	0.563998	0.70947	0.761753	0.666083	0.450561	0.199018	0.033593	-0.0311175	-0.0468833	-0.0780393	-0.134514	-0.186825	-0.232697	-0.29703	-0.403772	-0.529167	-0.655156	-0.653711	-0.57028	-0.404898	-0.170548	0.0799153	0.264016	0.34404	0.31929	0.258249	0.163902
0.379684	0.356214	0.408995	0.502785	0.546107	0.488858	0.327822	0.110031	-0.0906918	-0.228889	-0.26373	-0.175428	0.0149866	0.251657	0.451797	0.506537	0.414676	0.249001	0.0836689	0.0689905	0.114698	0.173422	0.221496	0.231289	0.199813	0.166482	0.0854968	0.0272231	-0.00636114	0.015099	0.0834295	0.145864	0.105363	0.00812433	-0.0958588	-0.177059	-0.161724	-0.100794	-0.0306845	-0.00162731	-0.0358575	-0.110096	-0.188867	-0.263633	-0.240994	-0.140367	-0.00671095	0.108803	0.0908384	-0.0360008
0.418653	0.35403	0.233719	0.0517509	-0.165868	-0.402343	-0.523961	-0.543121	-0.45127	-0.318043	-0.231244	-0.240452	-0.339289	-0.433207	-0.491382	-0.480226	-0.4799	-0.454788	-0.429546	-0.411491	-0.44063	-0.433737	-0.3738	-0.241171	-0.0495952	0.119848	0.248638	0.278471	0.221307	0.136809	0.0829976	0.118018	0.206676	0.352575	0.449074	0.498347	0.380118	0.141479	-0.149854	-0.403528	-0.56156	-0.639281	-0.658469	-0.703685	-0.746552	-0.782888	-0.819055	-0.82328	-0.752571	-0.582258
0.214342	0.275351	0.397264	0.55061	0.720718	0.913952	1.01357	1.06411	1.12346	1.26765	1.46289	1.63085	1.74176	1.68427	1.53433	1.37794	1.26302	1.21684	1.18333	1.13209	1.02221	0.957113	0.938198	0.953629	0.945992	0.904059	0.879435	0.947599	1.12521	1.38806	1.60697	1.6912	1.56067	1.33406	1.06123	0.912965	0.944134	1.00582	1.05436	0.957169	0.767616	0.527807	0.298247	0.0793948	-0.0555961	-0.000997119	0.243557	0.554987	0.81509	0.960814
-0.134494	-0.240726	-0.376373	-0.453417	-0.487281	-0.459237	-0.392794	-0.313129	-0.188857	-0.0404884	0.0900071	0.122207	0.0556609	-0.121118	-0.294743	-0.43604	-0.483286	-0.450171	-0.357204	-0.228542	-0.114019	-0.0248194	0.0432063	0.0925793	0.074179	0.0737997	0.0986588	0.129875	0.199097	0.276281	0.408735	0.431157	0.293935	-0.00741911	-0.4051	-0.754283	-0.962594	-0.970188	-0.8217	-0.629527	-0.484574	-0.315056	-0.0931318	0.198364	0.516767	0.724983	0.821597	0.749497	0.542709	0.375535
1.22666	0.998264	0.744124	0.442174	0.173372	-0.0332133	-0.150996	-0.226378	-0.304319	-0.384845	-0.422462	-0.442323	-0.423174	-0.353592	-0.261071	-0.17335	-0.159583	-0.158998	-0.133458	0.00479853	0.24316	0.53949	0.833615	1.03176	1.03803	0.907275	0.745837	0.635516	0.534815	0.402921	0.27144	0.161932	0.129298	0.149829	0.208907	0.276445	0.349473	0.323665	0.241958	0.21274	0.264019	0.433995	0.683479	0.872156	0.915184	0.81686	0.63813	0.451772	0.255368	0.0818712
-0.168556	-0.237674	-0.252524	-0.214249	-0.185637	-0.0855283	0.0300551	0.196675	0.402858	0.626875	0.786809	0.802315	0.69718	0.499639	0.353745	0.217509	0.116103	-0.00253199	-0.122335	-0.229881	-0.262262	-0.202035	-0.0632571	0.0815822	0.142706	0.0986935	-0.043851	-0.185565	-0.253974	-0.235818	-0.149479	-0.0482422	0.0541737	0.13719	0.161542	0.114399	0.0104979	-0.125932	-0.267131	-0.39041	-0.520646	-0.625444	-0.744964	-0.801592	-0.729664	-0.545467	-0.346345	-0.157752	-0.0278954	0.0608605
0.994904	0.861154	0.735899	0.681088	0.672227	0.701985	0.714655	0.748262	0.722636	0.716116	0.69656	0.719827	0.695254	0.629865	0.554494	0.508071	0.477548	0.40593	0.32156	0.241085	0.249423	0.340559	0.463245	0.548045	0.547594	0.5562	0.609103	0.741278	0.906879	1.02314	0.972623	0.888516	0.77912	0.796622	0.880925	0.956265	0.890405	0.712185	0.459143	0.204943	0.0492473	-0.0198106	0.012213	0.0719525	0.122405	0.0929122	0.0248542	-0.05794	-0.0933612	0.0195468
0.125562	0.0982261	0.0836745	0.0916529	0.0777759	0.0590783	-0.00225079	-0.0871576	-0.171343	-0.222258	-0.161161	-0.0199716	0.177866	0.284409	0.284113	0.101318	-0.10685	-0.316567	-0.428654	-0.502109	-0.556447	-0.595177	-0.631438	-0.667382	-0.662616	-0.607885	-0.462499	-0.290354	-0.13206	-0.0295206	0.0278844	0.0989359	0.18997	0.303218	0.413383	0.437254	0.326561	0.132741	-0.0892448	-0.242276	-0.244795	-0.114197	0.110233	0.339901	0.469177	0.49496	0.464526	0.427602	0.446788	0.484911
0.768052	0.845725	0.882239	0.850561	0.745553	0.642684	0.53984	0.439988	0.237661	0.100745	0.0650299	0.163929	0.345271	0.545314	0.674805	0.742132	0.781663	0.784343	0.710961	0.592758	0.488806	0.398448	0.328809	0.247988	0.261004	0.387937	0.605236	0.889746	1.137	1.31031	1.25598	0.989964	0.638887	0.273496	0.05498	-0.0567381	0.0119639	0.147946	0.244065	0.248741	0.214924	0.246298	0.426369	0.70771	0.941985	1.09918	1.03186	0.880473	0.723876	0.644833
-0.463739	-0.473625	-0.487327	-0.527512	-0.630124	-0.741022	-0.856974	-0.857204	-0.798204	-0.612717	-0.414751	-0.205021	-0.0299833	0.0615518	0.085052	0.00698254	-0.0866068	-0.226976	-0.323559	-0.431474	-0.521048	-0.645885	-0.747963	-0.764592	-0.664742	-0.459685	-0.309523	-0.239739	-0.316406	-0.474174	-0.564637	-0.460915	-0.153361	0.244328	0.524957	0.525558	0.306878	-0.0530203	-0.379199	-0.536782	-0.495578	-0.237164	0.200759	0.676187	1.03155	1.24712	1.29842	1.15772	0.935163	0.727756
0.399792	0.317856	0.205217	0.0921929	0.00439033	-0.0484065	0.0241848	0.159888	0.362089	0.526946	0.590568	0.566213	0.438614	0.250948	0.0856781	0.0379801	0.137971	0.296702	0.380082	0.326592	0.178862	0.0100909	-0.060714	-0.0696114	-0.0957586	-0.182111	-0.30158	-0.381604	-0.373428	-0.285446	-0.178819	-0.0683977	0.0300463	0.0832262	0.121715	0.121414	0.0874761	0.0177807	-0.0823413	-0.202941	-0.358173	-0.47837	-0.572869	-0.592922	-0.565001	-0.485173	-0.340102	-0.167171	0.0646409	0.271818
0.12772	-0.162084	-0.409723	-0.559141	-0.55914	-0.41613	-0.227296	-0.0499273	0.0566598	0.0927429	0.0672035	0.0291585	-0.048	-0.089855	-0.0728718	-0.0287644	0.0248961	0.0737777	0.03403	-0.0407055	-0.177821	-0.323829	-0.427752	-0.466893	-0.413505	-0.292656	-0.244012	-0.257458	-0.317448	-0.4008	-0.449196	-0.405331	-0.326067	-0.216626	-0.109775	-0.0186218	0.0536275	0.0845106	0.0855847	0.11272	0.121089	0.151539	0.19664	0.208007	0.146827	0.0720284	0.0607588	0.121428	0.269953	0.399064
0.900969	0.848525	0.772728	0.605378	0.492781	0.403118	0.392885	0.425302	0.47934	0.436811	0.333087	0.18873	0.011947	-0.16649	-0.369643	-0.522293	-0.608364	-0.581052	-0.454376	-0.275749	-0.236357	-0.319981	-0.419955	-0.535174	-0.613643	-0.670553	-0.625285	-0.499041	-0.350609	-0.219853	-0.0475288	0.100586	0.144247	0.0501427	-0.101749	-0.29	-0.419511	-0.528313	-0.503528	-0.454054	-0.383191	-0.259563	-0.0889352	0.0574025	0.056539	-0.0673432	-0.205277	-0.307703	-0.32111	-0.294747
0.721164	0.580914	0.515313	0.548652	0.640325	0.701588	0.667903	0.460001	0.232695	0.1362	0.173267	0.366615	0.56907	0.705703	0.652517	0.464224	0.155804	-0.188683	-0.525175	-0.824344	-0.97435	-1.00435	-0.903391	-0.73194	-0.475915	-0.186639	0.0799582	0.239115	0.280653	0.208928	0.0467525	-0.133086	-0.278701	-0.339274	-0.356451	-0.38787	-0.414446	-0.380967	-0.301194	-0.159349	-0.0199873	0.0913857	0.140802	0.0705502	-0.094583	-0.285379	-0.467965	-0.573211	-0.575836	-0.524718
-0.727629	-0.600966	-0.39799	-0.172115	0.0579724	0.195046	0.222241	0.219005	0.188451	0.122439	0.0412211	-0.141776	-0.353281	-0.512217	-0.580953	-0.438167	-0.177988	0.141273	0.400607	0.558842	0.603195	0.6503	0.673903	0.648474	0.543674	0.395142	0.202859	0.0852739	0.0145871	0.0691179	0.225472	0.355707	0.433196	0.391731	0.385801	0.385959	0.394026	0.357897	0.257937	0.151057	0.067937	0.0906044	0.167214	0.306249	0.450469	0.633429	0.696048	0.638312	0.424826	0.189134
-0.453518	-0.460534	-0.459407	-0.433818	-0.419868	-0.418681	-0.339137	-0.184271	0.00247071	0.143358	0.287154	0.391566	0.435897	0.30282	-0.016883	-0.444229	-0.813592	-0.975346	-0.857846	-0.60996	-0.395727	-0.279268	-0.239281	-0.218594	-0.250968	-0.310183	-0.352704	-0.378644	-0.426711	-0.477716	-0.469278	-0.333268	-0.140061	0.0452872	0.0612705	-0.0220233	-0.11632	-0.0816078	-0.00151498	0.0707623	-0.0176021	-0.221294	-0.462392	-0.655932	-0.698409	-0.627736	-0.503314	-0.396964	-0.370194	-0.408865
0.994611	1.15782	1.19744	1.05874	0.762247	0.371049	0.035633	-0.199129	-0.337834	-0.461613	-0.582087	-0.59956	-0.482925	-0.243597	0.051747	0.275647	0.378537	0.366805	0.25991	0.167224	0.150736	0.194948	0.31877	0.477928	0.700883	0.955965	1.12883	1.21762	1.22332	1.20556	1.23198	1.18617	1.01984	0.751132	0.474136	0.248505	0.0335071	-0.094192	-0.00688908	0.23274	0.543681	0.815693	0.924225	0.871816	0.621797	0.32511	0.0747616	-0.0154505	-0.0411026	-0.0579294
0.20859	0.180949	0.155849	0.172027	0.176946	0.125959	0.0525477	0.0195627	0.0599894	0.175947	0.331967	0.469653	0.55868	0.629219	0.690604	0.661773	0.492977	0.243137	0.0221424	-0.122814	-0.0779569	0.139353	0.430357	0.60741	0.579041	0.334761	0.052909	-0.115761	-0.130022	0.0479385	0.229621	0.33792	0.439388	0.537986	0.652348	0.773826	0.819801	0.828642	0.730746	0.50141	0.24656	0.119399	0.13266	0.206089	0.245662	0.199506	0.163243	0.158895	0.314461	0.60819
-0.171431	-0.0744234	0.0229505	0.149081	0.177689	0.0869199	-0.104327	-0.292882	-0.451475	-0.569045	-0.599581	-0.51037	-0.289646	0.0148241	0.253793	0.356588	0.269252	0.203617	0.29862	0.480154	0.670077	0.752863	0.697228	0.526011	0.315724	0.156203	0.0281418	-0.166055	-0.360949	-0.551103	-0.70609	-0.807355	-0.751795	-0.520758	-0.180357	0.194438	0.470854	0.566024	0.537848	0.433412	0.342296	0.317568	0.425694	0.592492	0.818478	0.994433	1.13441	1.25482	1.34422	1.43435
0.14355	0.332794	0.533195	0.75186	0.891087	0.968964	0.92544	0.74572	0.482901	0.260067	0.124468	0.107553	0.163834	0.214194	0.358271	0.485566	0.495549	0.374794	0.193569	0.00812702	-0.108825	-0.137238	-0.121406	-0.11048	-0.123843	-0.179601	-0.282381	-0.359576	-0.359527	-0.270686	-0.140763	-0.00858811	0.0800619	0.151318	0.238472	0.369259	0.563111	0.724652	0.832083	0.862836	0.828867	0.716426	0.503289	0.26189	0.0182741	-0.11927	-0.122296	-0.0218399	0.171339	0.350807
-0.83573	-0.679427	-0.38911	-0.0340148	0.260022	0.477566	0.720662	0.955163	1.11249	1.12472	1.02929	0.82668	0.597239	0.446718	0.430265	0.491866	0.57	0.607396	0.506942	0.344902	0.26958	0.337162	0.509564	0.717955	0.803673	0.716556	0.560277	0.472422	0.501184	0.549479	0.508992	0.411756	0.281781	0.206369	0.164378	0.156631	0.0269517	-0.209174	-0.44183	-0.581982	-0.509334	-0.316386	-0.0886893	0.0182212	0.0303141	-0.00435142	0.0592667	0.199496	0.42972	0.653121
-0.445699	-0.351771	-0.287748	-0.339748	-0.421844	-0.504186	-0.477857	-0.366462	-0.0892623	0.217781	0.428195	0.447958	0.354153	0.284679	0.278687	0.368165	0.457456	0.491383	0.406129	0.255202	0.11591	0.127987	0.250166	0.408888	0.52531	0.542299	0.440082	0.193959	-0.0751348	-0.278565	-0.330615	-0.234032	-0.0990142	0.00693539	0.0768389	0.0778124	0.0359428	0.0122965	0.0278034	0.0496908	0.021768	-0.0384451	-0.17583	-0.27191	-0.273757	-0.155756	0.0983591	0.378811	0.597142	0.651443
-0.236637	-0.269143	-0.202064	-0.0371767	0.180116	0.337963	0.412745	0.354402	0.183818	-0.0417385	-0.139286	-0.0907274	0.0574399	0.233873	0.363002	0.464031	0.453854	0.352806	0.193087	0.060699	0.00508715	0.0769125	0.282593	0.54106	0.699841	0.687748	0.49457	0.188546	-0.141211	-0.373473	-0.446325	-0.358109	-0.188471	-0.0225193	0.0932355	0.186207	0.252403	0.346736	0.458005	0.52727	0.567613	0.592703	0.56233	0.420122	0.168063	-0.0948821	-0.299737	-0.368931	-0.257664	0.00495351
-0.306945	-0.241173	-0.173894	-0.0740818	-0.0525565	-0.0811645	-0.151956	-0.133719	-0.0204057	0.157616	0.398367	0.567318	0.608675	0.512364	0.321084	0.0252036	-0.209655	-0.342921	-0.348728	-0.269865	-0.0918607	0.138297	0.278919	0.306534	0.26957	0.198409	0.142945	0.0709821	0.0307848	-0.0726397	-0.196663	-0.403684	-0.579553	-0.67437	-0.638111	-0.481047	-0.301012	-0.155819	-0.111779	-0.102614	-0.129521	-0.145732	-0.116301	-0.0143073	0.085381	0.162623	0.112357	-0.0251189	-0.137817	-0.149097
0.48731	0.580345	0.641717	0.668087	0.611965	0.557418	0.539802	0.600581	0.730541	0.824274	0.796317	0.625048	0.415062	0.227319	0.136371	0.12278	0.119808	0.0458247	-0.100113	-0.243794	-0.328168	-0.288971	-0.154597	0.0418213	0.128893	0.0849294	-0.0740431	-0.252409	-0.377462	-0.328646	-0.184142	-0.0678043	-0.0985888	-0.279539	-0.475753	-0.526485	-0.330594	0.0388739	0.396737	0.579422	0.614746	0.616798	0.60887	0.589354	0.524699	0.343591	0.151547	-0.00487348	-0.0231854	0.0553605
-0.194456	-0.290879	-0.352913	-0.401388	-0.41264	-0.412086	-0.376571	-0.25878	-0.0145127	0.269757	0.554133	0.698912	0.682871	0.606949	0.437673	0.274764	0.169361	0.122319	0.0535036	-0.00466229	-0.0889538	-0.163164	-0.208786	-0.24562	-0.221343	-0.185163	-0.181566	-0.240825	-0.298974	-0.338212	-0.339331	-0.360752	-0.436804	-0.43723	-0.298798	-0.0455111	0.249059	0.499252	0.619843	0.598068	0.484005	0.290277	0.057945	-0.100946	-0.0452322	0.22395	0.545104	0.813605	0.946045	0.897964
-0.215503	-0.197289	-0.125761	0.000753191	0.164692	0.337443	0.445267	0.553357	0.639311	0.711775	0.77445	0.826135	0.877806	0.898361	0.850129	0.700893	0.56332	0.461534	0.482477	0.534579	0.562252	0.491952	0.356674	0.187126	0.0765536	0.0374353	0.0150708	-0.00246903	-0.0422439	-0.0118893	0.129018	0.346982	0.54258	0.695292	0.727204	0.692956	0.568396	0.462538	0.408175	0.420969	0.491479	0.615747	0.736435	0.837158	0.899761	0.921541	0.843751	0.664618	0.469239	0.312472
-0.0182208	-0.173583	-0.243961	-0.210826	-0.087956	0.0733139	0.218593	0.34138	0.477161	0.625543	0.738044	0.771255	0.721578	0.60625	0.507486	0.491497	0.530537	0.600541	0.619691	0.591785	0.543614	0.451295	0.37609	0.347967	0.272488	0.16664	0.0968234	0.143605	0.269043	0.428625	0.494537	0.440283	0.285878	0.0958351	-0.016528	0.00258127	0.0707835	0.0719109	-0.0147689	-0.1194	-0.183816	-0.199011	-0.197491	-0.218623	-0.249457	-0.309476	-0.39441	-0.476736	-0.521503	-0.453474
0.182244	0.40632	0.651873	0.875601	0.978291	0.928891	0.762406	0.615439	0.625462	0.867341	1.21448	1.45471	1.51846	1.31202	0.905554	0.458787	0.165738	0.0379996	0.0147537	-0.034531	-0.0949741	-0.100794	0.0126837	0.264971	0.592887	0.813471	0.885208	0.869519	0.825994	0.914731	1.06971	1.24959	1.26472	1.10142	0.834569	0.58391	0.474149	0.526329	0.62572	0.58281	0.260747	-0.264881	-0.811368	-1.1469	-1.24641	-1.16	-0.973945	-0.725294	-0.452	-0.202758
0.292536	0.393736	0.475107	0.547874	0.593453	0.644215	0.712553	0.771396	0.90588	1.11378	1.31499	1.37371	1.27038	1.02744	0.729591	0.463359	0.2922	0.180629	0.0600936	-0.0343729	-0.135869	-0.18907	-0.187576	-0.154749	-0.0718939	0.0560841	0.17566	0.367871	0.555034	0.780746	0.947215	0.969158	0.882683	0.718835	0.517927	0.331216	0.26354	0.267322	0.299834	0.303436	0.223625	0.142863	0.14526	0.221075	0.359782	0.502328	0.610059	0.667533	0.639048	0.50601
0.537958	0.643856	0.736473	0.877677	0.970814	1.00347	0.956649	0.798779	0.616243	0.496981	0.422459	0.436074	0.482037	0.559044	0.60752	0.628298	0.665192	0.76853	0.897889	1.01201	1.19031	1.35383	1.48562	1.5672	1.63001	1.61985	1.53057	1.33051	1.0877	0.797735	0.579013	0.528977	0.571476	0.644452	0.606286	0.396318	0.105153	-0.125311	-0.18637	-0.0696629	0.110698	0.194746	0.191995	0.127302	0.022087	-0.144751	-0.254235	-0.217253	-0.0768402	0.14205
0.47718	0.606974	0.713099	0.703184	0.524233	0.249628	-0.0787361	-0.345746	-0.440822	-0.401044	-0.336135	-0.238907	-0.144932	-0.109659	-0.123611	-0.314941	-0.559572	-0.782698	-0.898381	-0.827039	-0.628692	-0.463404	-0.416896	-0.418264	-0.447386	-0.426334	-0.38474	-0.267703	-0.13092	0.0243304	0.137235	0.14687	0.0232443	-0.0959968	-0.221431	-0.25417	-0.178204	-0.0600146	0.0825151	0.160414	0.0964765	-0.0914652	-0.323513	-0.524387	-0.617708	-0.646025	-0.605108	-0.504103	-0.400171	-0.293637
-0.473192	-0.298809	-0.159355	-0.0810205	-0.0543198	-0.046698	0.000863394	0.0800715	0.0819524	0.0155957	-0.097152	-0.219884	-0.293315	-0.288223	-0.284336	-0.245865	-0.258655	-0.378017	-0.502181	-0.548051	-0.472924	-0.290253	-0.0568728	0.150324	0.250637	0.149363	-0.0265453	-0.164005	-0.20009	-0.0679842	0.107056	0.187674	0.0362496	-0.289151	-0.58879	-0.728378	-0.698238	-0.523631	-0.329734	-0.269971	-0.385268	-0.731287	-1.12903	-1.38305	-1.42611	-1.132	-0.658304	-0.236857	0.0198879	-8.05761e-05
0.676071	0.67411	0.680606	0.588941	0.43713	0.27599	0.200421	0.199682	0.304708	0.428754	0.458399	0.383293	0.274809	0.166782	0.0421949	-0.0976911	-0.210848	-0.241888	-0.18265	-0.02767	0.147626	0.227978	0.116939	-0.15742	-0.455354	-0.591465	-0.515846	-0.299603	-0.127812	-0.00665304	0.0426507	0.0925161	0.202936	0.330627	0.387018	0.395449	0.341738	0.272126	0.197627	0.107635	0.042542	-0.0412919	-0.207303	-0.420288	-0.64215	-0.775235	-0.706375	-0.442296	-0.126807	0.0930247
0.3984	0.268389	0.180953	0.093286	0.034023	0.0551249	0.0608082	0.0461817	-0.00715481	-0.0340871	-0.0645765	-0.148374	-0.248641	-0.37526	-0.47823	-0.516836	-0.445439	-0.312894	-0.167515	-0.0530724	-0.00803897	-0.00376349	-0.0413569	-0.0399129	-0.0419252	-0.0474829	-0.066978	-0.176942	-0.320156	-0.492793	-0.659049	-0.713637	-0.552279	-0.286213	0.0416226	0.352704	0.543358	0.588517	0.475545	0.241686	-0.0160258	-0.271139	-0.468992	-0.604984	-0.728143	-0.793574	-0.837786	-0.865502	-0.91893	-1.04351
-0.310357	-0.259418	-0.251543	-0.253159	-0.224211	-0.103562	0.0880404	0.300909	0.485239	0.580783	0.539926	0.391025	0.22411	0.0494166	-0.0710473	-0.100472	-0.0503516	-0.0192276	-0.0309044	-0.0635383	-0.0659546	-0.0343207	0.0352869	0.0238699	-0.0293987	-0.146313	-0.23523	-0.306713	-0.306553	-0.231539	-0.112118	0.00758332	0.100966	0.13383	0.109337	0.0289718	-0.105494	-0.318604	-0.586656	-0.80178	-0.929935	-0.954198	-0.900769	-0.739247	-0.477387	-0.226926	-0.0146103	0.139304	0.198806	0.184682
[truncated: 91 more columns]

## Sheet: Figure 5B-SR
-1.01861	-1.24201	-1.42415	-1.56468	-1.56762	-1.42952	-1.18817	-0.910753	-0.645788	-0.444933	-0.306293	-0.281861	-0.317394	-0.338724	-0.324392	-0.313133	-0.256327	-0.129067	0.0133935	0.0783523	0.0617541	-0.0367787	-0.123014	-0.201775	-0.226313	-0.297448	-0.457575	-0.741791	-1.05882	-1.36412	-1.58987	-1.66867	-1.58726	-1.36089	-1.02225	-0.642817	-0.266241	0.0349936	0.222896	0.2523	0.0908463	-0.21899	-0.576944	-0.931864	-1.25191	-1.5418	-1.76853	-1.93308	-2.00226	-1.91542
1.37971	1.33417	1.21167	0.977655	0.684414	0.511229	0.454299	0.492364	0.525292	0.458425	0.346974	0.22714	0.160619	0.155196	0.154296	0.0968261	-0.0517359	-0.27192	-0.496167	-0.693529	-0.806908	-0.803976	-0.750881	-0.675488	-0.572764	-0.478312	-0.337302	-0.180863	-0.0515307	0.0573257	0.13403	0.24805	0.336456	0.393271	0.409271	0.393378	0.430548	0.498069	0.526411	0.554911	0.534692	0.493135	0.467325	0.476014	0.439163	0.370635	0.275022	0.188934	0.149255	0.0859265
0.660875	0.611907	0.59477	0.548167	0.524826	0.46816	0.437644	0.487481	0.565393	0.713941	0.776315	0.728244	0.602831	0.468326	0.391586	0.447907	0.535447	0.617531	0.600673	0.516976	0.416403	0.317203	0.287962	0.318669	0.46136	0.634245	0.770617	0.758606	0.693598	0.61663	0.634008	0.729662	0.808545	0.792699	0.712939	0.593047	0.48553	0.502622	0.625197	0.821277	0.967349	0.977122	0.853756	0.668058	0.49496	0.340928	0.139361	-0.143551	-0.443145	-0.658531
0.257034	0.307161	0.317183	0.267316	0.184799	0.114793	0.11789	0.191563	0.286599	0.349826	0.342373	0.262208	0.136075	0.0125136	-0.0590195	-0.118362	-0.115131	-0.110291	-0.121268	-0.16356	-0.29578	-0.496042	-0.686997	-0.831958	-0.899204	-0.887891	-0.818811	-0.72336	-0.669046	-0.597546	-0.544237	-0.505764	-0.482155	-0.379976	-0.264939	-0.153481	-0.0502878	0.0016367	0.00841757	-0.061551	-0.140774	-0.129888	-0.0451814	0.129108	0.314892	0.47249	0.564626	0.593723	0.601013	0.62628
1.23798	1.34831	1.40008	1.41757	1.33949	1.17019	0.956944	0.709843	0.448587	0.185731	-0.0346468	-0.270199	-0.42278	-0.462138	-0.381078	-0.199127	-0.00869746	0.126079	0.143527	0.104869	0.122457	0.188182	0.273313	0.339613	0.353607	0.216857	0.0300202	-0.121891	-0.240091	-0.229273	-0.0960574	0.11491	0.285078	0.38333	0.414444	0.35177	0.180889	0.0391253	-0.049539	-0.100306	-0.218549	-0.400168	-0.610859	-0.77506	-0.787586	-0.647373	-0.486034	-0.405142	-0.341889	-0.302561
-0.872384	-0.698389	-0.52403	-0.375803	-0.268676	-0.220563	-0.229747	-0.281596	-0.361732	-0.44815	-0.506909	-0.524582	-0.454229	-0.341664	-0.261764	-0.235618	-0.24893	-0.218785	-0.0880246	0.103428	0.263008	0.315869	0.230229	0.120718	0.00799323	-0.0828438	-0.110007	-0.0729778	-0.0299863	-0.0237163	0.000635375	0.0456071	0.181247	0.345569	0.451455	0.520291	0.524634	0.447682	0.332725	0.245387	0.124649	-0.00475504	-0.120389	-0.151699	-0.0409151	0.102079	0.238435	0.347453	0.383838	0.432513
0.348185	0.236077	0.127428	0.0415592	0.011072	-0.0306985	-0.138619	-0.339147	-0.614665	-0.876291	-1.06163	-1.07299	-0.931652	-0.693627	-0.46049	-0.263187	-0.143089	-0.0947582	-0.0716779	-0.0255684	0.0670068	0.111937	0.0271824	-0.234289	-0.633504	-1.05429	-1.37901	-1.5641	-1.61854	-1.62203	-1.61129	-1.54756	-1.4728	-1.36102	-1.22013	-1.04178	-0.769981	-0.423386	-0.0427623	0.316826	0.568781	0.723421	0.822424	0.952264	1.03889	1.06567	0.928321	0.738585	0.568607	0.486483
-0.231815	-0.470803	-0.741084	-1.02788	-1.24332	-1.37429	-1.44956	-1.40544	-1.34053	-1.18279	-0.917283	-0.481787	-0.0747108	0.250273	0.355469	0.286606	0.0902559	-0.200836	-0.45555	-0.687079	-0.822477	-0.811427	-0.662334	-0.3915	0.0501053	0.506018	0.933044	1.26236	1.44806	1.45523	1.35262	1.12354	0.915623	0.79708	0.80561	0.911726	1.05806	1.1136	1.06931	0.990184	0.952652	0.940059	0.84409	0.678197	0.516088	0.401368	0.293257	0.2067	0.199306	0.293845
-0.178069	-0.103721	0.0407687	0.180601	0.285703	0.331998	0.300856	0.171583	-0.0359273	-0.2353	-0.440978	-0.583598	-0.692991	-0.759895	-0.764844	-0.733724	-0.663716	-0.540289	-0.389327	-0.224637	-0.121255	-0.116925	-0.158999	-0.192337	-0.196653	-0.183556	-0.192105	-0.289973	-0.459926	-0.647869	-0.818385	-0.959653	-1.12271	-1.30498	-1.49959	-1.62901	-1.63857	-1.53549	-1.35937	-1.21325	-1.0747	-0.929847	-0.792661	-0.66064	-0.523893	-0.376393	-0.26405	-0.254728	-0.41357	-0.682721
-0.860417	-0.821798	-0.777063	-0.764355	-0.78541	-0.792238	-0.788667	-0.760716	-0.667353	-0.613881	-0.647785	-0.739042	-0.826571	-0.875599	-0.902107	-0.950438	-0.936089	-0.87106	-0.740005	-0.555357	-0.367476	-0.215478	-0.0966607	-0.0498726	0.0386011	0.100371	0.152833	0.106881	-0.0368352	-0.219914	-0.289609	-0.209492	0.00806074	0.263677	0.416387	0.418434	0.334551	0.203851	0.0321958	-0.129727	-0.309027	-0.500815	-0.670879	-0.826307	-0.865845	-0.82043	-0.685434	-0.512935	-0.394382	-0.376792
-0.732919	-0.842036	-0.866772	-0.81827	-0.7531	-0.691115	-0.697366	-0.757804	-0.823295	-0.842939	-0.770104	-0.650428	-0.54943	-0.482799	-0.442422	-0.434801	-0.393805	-0.355288	-0.340545	-0.425974	-0.573117	-0.634371	-0.554376	-0.342181	-0.0867539	0.125945	0.262609	0.294491	0.280585	0.248582	0.231207	0.224691	0.260563	0.35037	0.439132	0.497702	0.540491	0.533614	0.483226	0.358915	0.241443	0.166334	0.146863	0.209684	0.359566	0.535775	0.646178	0.724799	0.741594	0.672548
0.103428	0.0261593	-0.084816	-0.185009	-0.25092	-0.300208	-0.368971	-0.447305	-0.513298	-0.578987	-0.612245	-0.682818	-0.753792	-0.830364	-0.882123	-0.916752	-0.937839	-1.00112	-1.03777	-1.01626	-0.977864	-0.917842	-0.83644	-0.690932	-0.427462	-0.0534013	0.346057	0.708719	0.958707	1.14636	1.31014	1.4457	1.56554	1.67676	1.69157	1.60934	1.39598	1.09868	0.747962	0.407221	0.151221	-0.0102876	-0.105659	-0.165817	-0.197586	-0.155472	0.021457	0.29093	0.58725	0.782527
0.47452	0.219053	0.0178294	-0.145095	-0.252621	-0.321338	-0.314699	-0.3137	-0.341025	-0.428275	-0.62386	-0.858282	-1.18663	-1.53891	-1.85323	-2.01944	-1.97155	-1.73234	-1.4281	-1.17028	-0.986276	-0.951081	-0.981279	-1.00826	-0.993297	-0.872149	-0.639321	-0.310399	0.0552283	0.3574	0.615378	0.851281	1.05869	1.18293	1.13364	1.02102	0.86987	0.730638	0.626655	0.570731	0.515759	0.449445	0.361299	0.25735	0.158573	0.0494346	-0.0122317	0.0258498	0.154016	0.301876
0.151218	0.0204228	-0.0762099	-0.134768	-0.0874961	-0.0160656	-0.0197688	-0.102576	-0.266861	-0.448313	-0.604756	-0.687661	-0.709426	-0.687313	-0.66694	-0.618278	-0.524474	-0.397136	-0.266582	-0.126897	-0.0237557	0.0596976	0.178736	0.350005	0.592702	0.87736	1.17067	1.38785	1.50584	1.46056	1.34387	1.2376	1.19021	1.22426	1.3317	1.44612	1.5445	1.57075	1.54881	1.54633	1.50203	1.50504	1.50089	1.50564	1.48189	1.40823	1.34905	1.32548	1.36738	1.40596
-0.944883	-1.03123	-1.12318	-1.17877	-1.17532	-1.10305	-0.989145	-0.831352	-0.652624	-0.445514	-0.280241	-0.233904	-0.284112	-0.387795	-0.469759	-0.493878	-0.434148	-0.337375	-0.293469	-0.311255	-0.393387	-0.497715	-0.565482	-0.581448	-0.492106	-0.351464	-0.203972	-0.113769	-0.0906691	-0.097652	-0.115131	-0.131014	-0.214341	-0.321017	-0.445381	-0.566758	-0.633453	-0.652046	-0.619271	-0.557513	-0.464993	-0.371318	-0.315096	-0.318424	-0.357965	-0.425941	-0.482661	-0.474195	-0.452965	-0.436887
0.639433	0.71184	0.785035	0.873306	0.98531	1.17416	1.44807	1.73279	1.94112	2.07742	2.10397	2.01368	1.85878	1.66177	1.48187	1.28624	1.04884	0.787644	0.545027	0.364319	0.273128	0.264485	0.384312	0.63419	0.931445	1.15836	1.25248	1.26806	1.18993	1.16001	1.20665	1.33662	1.49944	1.62076	1.70407	1.6861	1.64284	1.60529	1.5668	1.50281	1.44281	1.41025	1.40132	1.41906	1.45366	1.40516	1.12532	0.675012	0.167375	-0.216612
-0.652908	-0.367157	-0.0788748	0.146641	0.318355	0.414076	0.560057	0.727431	0.866917	0.898976	0.805769	0.602359	0.366223	0.149122	0.0272576	-0.0230923	-0.02428	0.00246041	0.00675643	0.0184808	-0.0317716	-0.182533	-0.318233	-0.370259	-0.33	-0.22097	-0.148008	-0.14946	-0.246938	-0.412561	-0.517897	-0.502146	-0.391622	-0.269054	-0.168518	-0.138543	-0.110229	-0.0717714	-0.0273763	0.097124	0.270122	0.516899	0.788408	0.946456	0.999034	0.892926	0.628784	0.377196	0.199194	0.112557
-0.772017	-0.726757	-0.638689	-0.519903	-0.454515	-0.4455	-0.557672	-0.705289	-0.780292	-0.772878	-0.738994	-0.754534	-0.801993	-0.82394	-0.762198	-0.634148	-0.443022	-0.233197	0.0335967	0.309788	0.593957	0.864763	1.06633	1.0407	0.842737	0.583715	0.368638	0.258738	0.203884	0.189964	0.157903	0.0469945	-0.104246	-0.2145	-0.248144	-0.219736	-0.192698	-0.20973	-0.239385	-0.330615	-0.436728	-0.544098	-0.633622	-0.671698	-0.647358	-0.520669	-0.334529	-0.12472	0.0043716	0.0658063
-0.381527	-0.340596	-0.289109	-0.279792	-0.360976	-0.453568	-0.483384	-0.35387	-0.108235	0.121748	0.18155	0.0682925	-0.23417	-0.538279	-0.720466	-0.748909	-0.664405	-0.600038	-0.567544	-0.611666	-0.625982	-0.552751	-0.339601	-0.0445693	0.218846	0.367407	0.413305	0.407482	0.308757	0.159653	-0.0931084	-0.394272	-0.739625	-1.03507	-1.15159	-1.11254	-0.879844	-0.579919	-0.285655	-0.0853082	0.073559	0.258684	0.443754	0.604893	0.726435	0.76296	0.696594	0.610492	0.55838	0.645897
-0.633808	-0.810477	-0.97136	-1.05434	-1.04857	-1.00837	-0.997578	-1.0058	-1.01148	-0.940424	-0.761612	-0.518106	-0.309219	-0.218198	-0.24687	-0.379248	-0.568032	-0.769941	-0.918174	-0.994634	-0.961751	-0.841176	-0.669663	-0.532121	-0.448864	-0.463858	-0.505964	-0.500617	-0.410236	-0.273982	-0.219252	-0.272487	-0.384941	-0.487041	-0.528488	-0.495684	-0.413635	-0.301807	-0.19508	-0.139628	-0.132755	-0.180744	-0.227311	-0.242992	-0.23365	-0.207244	-0.233369	-0.291771	-0.38668	-0.481514
1.01264	0.995414	0.872976	0.703711	0.445768	0.297221	0.280121	0.396466	0.485173	0.472257	0.393264	0.309119	0.281894	0.356022	0.539095	0.749521	0.939601	1.00099	0.877933	0.551213	0.0366677	-0.498798	-0.843638	-0.987532	-0.913059	-0.754338	-0.624333	-0.58208	-0.567126	-0.555747	-0.448285	-0.318201	-0.260298	-0.318974	-0.498457	-0.709742	-0.896166	-0.956636	-0.905022	-0.781208	-0.637632	-0.526465	-0.421607	-0.283291	-0.0658265	0.265068	0.702047	1.18152	1.57071	1.72359
0.740983	0.529301	0.324357	0.145684	0.00739832	-0.0546401	-0.0724072	-0.0100853	0.0988252	0.174669	0.198916	0.180824	0.144772	0.155029	0.153733	0.150434	0.120306	0.0823977	0.045225	0.00767899	-0.0181478	-0.0243397	0.00789042	0.0799376	0.203566	0.349827	0.510548	0.62724	0.632726	0.497643	0.250875	0.00845894	-0.116827	-0.18239	-0.231142	-0.311656	-0.365753	-0.367693	-0.313047	-0.192306	-0.0724949	-0.0378985	-0.0668246	-0.106776	-0.120301	-0.0996737	-0.0647994	0.0496756	0.207762	0.338234
-0.338756	-0.408731	-0.578749	-0.788317	-1.03815	-1.16529	-1.15789	-1.00935	-0.796383	-0.642426	-0.52639	-0.441662	-0.386734	-0.406002	-0.496237	-0.625127	-0.73317	-0.793589	-0.860459	-0.917758	-0.93294	-0.852902	-0.736776	-0.628819	-0.65603	-0.796151	-0.960232	-1.04358	-1.02613	-0.926961	-0.774302	-0.638795	-0.572794	-0.541241	-0.458315	-0.351031	-0.29965	-0.3434	-0.538497	-0.8664	-1.17132	-1.33552	-1.31533	-1.20899	-1.05584	-0.87647	-0.657799	-0.555555	-0.467556	-0.472977
0.439263	0.469803	0.529672	0.620671	0.846981	1.11436	1.45014	1.81667	2.10222	2.22611	2.16381	1.88005	1.35467	0.691695	0.0507077	-0.46412	-0.778744	-0.828253	-0.680755	-0.452597	-0.214196	-0.160369	-0.205397	-0.285391	-0.235564	-0.115911	0.0460626	0.120982	0.132786	0.113672	0.111862	0.195857	0.302147	0.335514	0.113343	-0.239609	-0.577045	-0.770362	-0.838251	-0.833175	-0.784368	-0.703412	-0.609643	-0.59688	-0.624063	-0.724316	-0.815207	-0.912364	-0.995353	-1.02297
-0.168594	-0.146951	-0.156058	-0.200915	-0.265194	-0.362166	-0.46987	-0.566694	-0.63192	-0.638999	-0.621847	-0.58608	-0.500847	-0.411665	-0.301925	-0.184384	-0.0135224	0.197008	0.426252	0.605789	0.698531	0.707649	0.696873	0.686535	0.679059	0.659977	0.564119	0.412749	0.224106	0.0191501	-0.159391	-0.296008	-0.345988	-0.326089	-0.265418	-0.182169	-0.122589	-0.0690568	-0.022999	-0.0313413	-0.111246	-0.240874	-0.41104	-0.586601	-0.695867	-0.718513	-0.625873	-0.48672	-0.29518	-0.156544
0.205534	0.351851	0.454792	0.478472	0.385128	0.180698	-0.0374773	-0.18572	-0.240619	-0.243384	-0.238929	-0.285234	-0.318531	-0.288042	-0.213594	-0.157452	-0.139641	-0.159149	-0.206052	-0.242575	-0.229137	-0.101749	0.0848538	0.265269	0.375168	0.329177	0.141921	-0.114809	-0.330808	-0.423874	-0.392772	-0.33511	-0.303714	-0.320309	-0.36497	-0.409457	-0.451691	-0.487279	-0.500278	-0.484448	-0.415158	-0.300397	-0.160674	-0.0212166	0.0613027	0.0491694	0.0222743	0.0251319	0.0865107	0.162597
1.15407	1.00703	0.858136	0.709962	0.595404	0.564032	0.646628	0.759716	0.852329	0.861696	0.843969	0.789775	0.759122	0.742595	0.72517	0.639446	0.50322	0.335456	0.159269	-0.0243587	-0.202993	-0.356679	-0.423512	-0.387202	-0.230972	-0.0462264	0.128183	0.234202	0.266953	0.273859	0.202648	0.0342638	-0.174795	-0.368033	-0.442307	-0.378493	-0.219828	-0.075726	0.0297863	-0.00153535	-0.110981	-0.289401	-0.43703	-0.464823	-0.402318	-0.233988	-0.0534511	0.149659	0.232677	0.174593
-0.457715	-0.349218	-0.267344	-0.290724	-0.425475	-0.646247	-0.823018	-0.908528	-0.897995	-0.875375	-0.853394	-0.866887	-0.951623	-1.0573	-1.14767	-1.13967	-1.01323	-0.749269	-0.528153	-0.388408	-0.373852	-0.401725	-0.429861	-0.465833	-0.443868	-0.453209	-0.440219	-0.423147	-0.354054	-0.335872	-0.366754	-0.504445	-0.62832	-0.704861	-0.695232	-0.635005	-0.56828	-0.476329	-0.371023	-0.246085	-0.168087	-0.118232	-0.136334	-0.16574	-0.218284	-0.315282	-0.404267	-0.5303	-0.6702	-0.793933
-0.132024	-0.121058	-0.155366	-0.245337	-0.391156	-0.551209	-0.658447	-0.675749	-0.574829	-0.411791	-0.22635	-0.0607333	0.103805	0.200749	0.25258	0.288087	0.284086	0.250638	0.218961	0.179481	0.140059	0.0930404	0.0347209	-0.0204264	-0.036064	0.00652444	0.0793657	0.191117	0.285537	0.345661	0.3569	0.324917	0.244761	0.213261	0.242462	0.330701	0.456029	0.572361	0.621783	0.61349	0.537806	0.409507	0.269784	0.168371	0.180681	0.257026	0.371522	0.488203	0.589307	0.675071
0.544617	0.397	0.178226	-0.0439467	-0.250964	-0.358208	-0.412588	-0.409281	-0.437053	-0.466452	-0.521602	-0.566947	-0.606699	-0.58159	-0.437289	-0.250689	-0.0754443	-0.0162942	-0.0352381	-0.0402327	0.0237845	0.171838	0.414836	0.605416	0.6906	0.638729	0.567579	0.452029	0.316714	0.160049	0.0552514	0.0555652	0.181567	0.397342	0.633501	0.81149	0.903663	0.954175	0.954721	0.996392	1.01277	0.97869	0.893946	0.713285	0.516441	0.350757	0.231116	0.138301	0.0492169	-0.0665085
0.123056	0.155223	0.179949	0.176974	0.131541	0.137175	0.238181	0.456431	0.685968	0.852737	0.928496	0.91033	0.851347	0.831532	0.899173	0.978856	1.05093	0.985515	0.805897	0.521715	0.201947	0.0115873	0.0543175	0.235155	0.433447	0.53303	0.469435	0.251492	-0.0851043	-0.393018	-0.546493	-0.614622	-0.6046	-0.460672	-0.335884	-0.273711	-0.238705	-0.114588	0.0704696	0.307831	0.492827	0.546272	0.420808	0.2306	0.103779	0.0352955	0.0235346	0.0328361	0.0541917	0.0562563
-0.32024	-0.403296	-0.492947	-0.586853	-0.608349	-0.583928	-0.548317	-0.616035	-0.76416	-0.843276	-0.890849	-0.899508	-0.915271	-0.924215	-0.867392	-0.703673	-0.428438	-0.114351	0.0631078	-0.00439275	-0.299014	-0.707994	-1.05747	-1.24528	-1.2278	-0.996039	-0.645102	-0.293054	0.0602618	0.348376	0.620072	0.851891	1.0026	1.06678	1.0876	1.03228	0.952122	0.879928	0.834611	0.833978	0.844993	0.829447	0.749357	0.637685	0.484172	0.406387	0.359128	0.386899	0.397916	0.362184
1.0051	0.903982	0.815995	0.798971	0.797634	0.76819	0.625417	0.381869	0.112577	-0.0538909	-0.1318	-0.124128	-0.0707019	-0.0127986	0.0509684	0.147157	0.225156	0.246739	0.298449	0.373709	0.472366	0.595291	0.635733	0.597577	0.428951	0.208253	-0.0363374	-0.340366	-0.681281	-0.957107	-1.05909	-0.950319	-0.672066	-0.319962	-0.00982805	0.223424	0.385971	0.566929	0.678715	0.742772	0.652326	0.448967	0.210863	0.00189066	-0.0826749	-0.0407739	0.103308	0.276659	0.379859	0.310853
-1.65059	-1.5847	-1.55498	-1.56276	-1.62678	-1.73855	-1.79738	-1.71185	-1.44234	-1.06662	-0.700676	-0.440615	-0.313382	-0.242559	-0.19722	-0.172221	-0.182768	-0.279704	-0.426986	-0.57674	-0.659345	-0.694205	-0.686508	-0.61125	-0.434256	-0.20168	0.0366766	0.20736	0.269958	0.205243	0.00365892	-0.264951	-0.50582	-0.611659	-0.56445	-0.429014	-0.298427	-0.250559	-0.304998	-0.445076	-0.577092	-0.631588	-0.603462	-0.499099	-0.367644	-0.281718	-0.215182	-0.175648	-0.0839471	0.0546681
0.0600252	0.10945	0.0837708	-0.023315	-0.1778	-0.355596	-0.519341	-0.644796	-0.717804	-0.759623	-0.774538	-0.795001	-0.846495	-0.896726	-0.940924	-0.93616	-0.934882	-0.970739	-1.01167	-1.06286	-1.06397	-1.02932	-0.973849	-0.91126	-0.814119	-0.674935	-0.525648	-0.397805	-0.307586	-0.317262	-0.4073	-0.498023	-0.557449	-0.545717	-0.469389	-0.336102	-0.198631	-0.0811248	-0.0151909	0.0269264	0.0268802	0.0674059	0.151857	0.254171	0.307655	0.293175	0.218138	0.12198	0.0724979	0.0608976
0.329806	0.266246	0.166364	0.0501066	-0.114535	-0.261838	-0.364724	-0.470832	-0.542099	-0.604507	-0.619842	-0.584306	-0.459651	-0.321756	-0.211652	-0.182754	-0.208252	-0.211017	-0.233639	-0.206342	-0.157466	-0.102033	-0.0880767	-0.104874	-0.165213	-0.235903	-0.323927	-0.442408	-0.602485	-0.833514	-1.06666	-1.2305	-1.26592	-1.17229	-0.964194	-0.720755	-0.494855	-0.360675	-0.29784	-0.316787	-0.36158	-0.3877	-0.35853	-0.272606	-0.196106	-0.257856	-0.487298	-0.820224	-1.11456	-1.24292
0.380009	0.220481	0.0670106	-0.0920144	-0.229765	-0.297062	-0.382691	-0.461164	-0.546118	-0.579764	-0.504078	-0.325915	-0.0934509	0.108627	0.252676	0.295441	0.313208	0.297356	0.249259	0.171143	0.0736061	-0.0406724	-0.143837	-0.212165	-0.266773	-0.331931	-0.437895	-0.549109	-0.600275	-0.502175	-0.293969	0.00911193	0.295746	0.453685	0.435438	0.286777	0.0263935	-0.300773	-0.610728	-0.880313	-0.995552	-0.966767	-0.812003	-0.650852	-0.546229	-0.530732	-0.583318	-0.630509	-0.70004	-0.748883
-0.988155	-1.31856	-1.59191	-1.76308	-1.75365	-1.56238	-1.32547	-1.0988	-0.999569	-1.05013	-1.20131	-1.41519	-1.66546	-1.90894	-2.11851	-2.20153	-2.13516	-1.95965	-1.76814	-1.66038	-1.64374	-1.65761	-1.67515	-1.68424	-1.59785	-1.44431	-1.24871	-1.02198	-0.772863	-0.573243	-0.44978	-0.451938	-0.492548	-0.5242	-0.550714	-0.598216	-0.684025	-0.802688	-0.861122	-0.8914	-0.92159	-0.919465	-0.930285	-0.892994	-0.813155	-0.751276	-0.778645	-0.843798	-0.950388	-1.03882
0.296501	0.212516	0.0945866	-0.00494816	-0.0986771	-0.189761	-0.263282	-0.255786	-0.211439	-0.152106	-0.0628114	0.110119	0.277964	0.388847	0.458906	0.565532	0.74343	0.911038	1.03875	1.07348	1.03318	0.947246	0.807985	0.611184	0.487906	0.398604	0.369369	0.345249	0.260067	0.0788453	-0.173276	-0.400788	-0.453108	-0.281723	0.0416842	0.453355	0.748501	0.962773	1.06215	1.1175	1.13519	1.07009	0.921094	0.748888	0.587862	0.426267	0.287343	0.132132	-0.0643516	-0.223751
0.130532	0.0533206	-0.0182774	-0.0682982	-0.0368631	0.0179838	0.105472	0.126314	0.0617868	-0.118653	-0.302406	-0.420216	-0.413193	-0.303036	-0.141844	0.0216404	0.0480002	-0.0536978	-0.247281	-0.478611	-0.693033	-0.757458	-0.708913	-0.544049	-0.283114	0.000722997	0.21926	0.302724	0.239336	0.129927	0.0322701	-0.028421	-0.0354077	-0.0297622	0.0352773	0.154106	0.290351	0.429487	0.492277	0.504379	0.399377	0.21512	-0.0429034	-0.265988	-0.448781	-0.507179	-0.488211	-0.438824	-0.397839	-0.36001
-0.933564	-0.745437	-0.455383	-0.167127	-0.00675431	-0.0293526	-0.132419	-0.248571	-0.295273	-0.215038	-0.02069	0.223747	0.410132	0.495865	0.42328	0.154274	-0.279047	-0.71479	-1.09931	-1.34609	-1.49048	-1.52242	-1.4848	-1.4651	-1.50017	-1.61822	-1.66985	-1.66923	-1.58891	-1.51324	-1.48533	-1.49813	-1.48248	-1.52566	-1.62187	-1.71152	-1.7865	-1.92456	-2.08882	-2.28173	-2.34082	-2.18681	-1.83658	-1.41074	-1.03899	-0.822684	-0.741013	-0.757282	-0.80458	-0.876045
-1.03915	-1.14745	-1.21247	-1.18713	-1.08441	-0.916672	-0.797381	-0.775818	-0.812615	-0.858769	-0.839654	-0.796818	-0.715037	-0.578866	-0.354952	-0.130083	0.0187388	-0.0614238	-0.340929	-0.654946	-0.920822	-1.01245	-1.05848	-1.11345	-1.19749	-1.24845	-1.17974	-0.974113	-0.634191	-0.316449	-0.119809	-0.103057	-0.210133	-0.35312	-0.431477	-0.413035	-0.309992	-0.196909	-0.109606	-0.0754401	-0.0785573	-0.0856147	-0.0307904	0.0496823	0.162116	0.270709	0.354996	0.396035	0.354991	0.145363
-0.249274	-0.242808	-0.271006	-0.27741	-0.312058	-0.327167	-0.375265	-0.479783	-0.563355	-0.575823	-0.443684	-0.212021	0.0826486	0.387206	0.595854	0.718598	0.826276	0.843253	0.790271	0.679125	0.564864	0.509788	0.437206	0.405507	0.341436	0.260645	0.196412	0.183611	0.187243	0.184955	0.112494	-0.0137345	-0.175008	-0.33635	-0.468054	-0.557336	-0.593155	-0.516498	-0.380802	-0.282235	-0.217637	-0.205308	-0.213146	-0.281688	-0.321225	-0.318979	-0.316032	-0.324842	-0.273475	-0.169613
0.0190583	-0.160848	-0.291143	-0.382084	-0.39754	-0.340872	-0.215343	-0.0811954	0.0286779	0.14241	0.253285	0.388259	0.486078	0.570971	0.618888	0.687415	0.762172	0.780427	0.735432	0.589861	0.396805	0.228623	0.0844319	-0.0242084	-0.115173	-0.22407	-0.341141	-0.449246	-0.600819	-0.717011	-0.80476	-0.807039	-0.750828	-0.664193	-0.557465	-0.478173	-0.440924	-0.439859	-0.474093	-0.511205	-0.527301	-0.507554	-0.478845	-0.465743	-0.443086	-0.383238	-0.330106	-0.253408	-0.17828	-0.0862987
0.585172	0.16969	-0.220653	-0.465861	-0.536781	-0.447509	-0.254223	-0.0557118	0.219125	0.442701	0.577346	0.569704	0.421774	0.198862	-0.0237453	-0.179729	-0.208474	-0.046076	0.216249	0.476112	0.710186	0.83436	0.884509	0.847305	0.826869	0.85412	0.897524	0.902359	0.83871	0.746909	0.635501	0.552333	0.476456	0.439431	0.444176	0.489848	0.585417	0.733162	0.855422	0.879312	0.752843	0.539036	0.328302	0.213195	0.212349	0.341318	0.423634	0.344432	0.117545	-0.121356
-0.277067	-0.201815	-0.0423084	0.203516	0.48842	0.7659	0.918151	0.900443	0.694528	0.327813	0.0933611	0.050872	0.176383	0.40799	0.556462	0.637813	0.596335	0.458422	0.291334	0.160198	0.117402	0.128051	0.178625	0.289769	0.296215	0.311357	0.3269	0.343794	0.373262	0.381549	0.44752	0.576722	0.731302	0.857164	0.884992	0.827858	0.749148	0.67355	0.679511	0.783713	0.949786	1.09614	1.18988	1.18679	1.11768	1.01422	0.960413	0.944228	0.938401	0.874549
0.970345	1.08182	1.16233	1.204	1.18765	1.11898	1.0049	0.852234	0.712176	0.598369	0.546221	0.504436	0.444422	0.374122	0.365868	0.42585	0.566639	0.647998	0.626684	0.447591	0.235466	0.0113227	-0.138536	-0.145457	-0.0522515	0.0686796	0.167386	0.278194	0.415887	0.661776	0.899475	1.0031	0.963609	0.785271	0.59484	0.43592	0.419637	0.488944	0.653767	0.781494	0.854598	0.915584	0.93113	0.93737	0.850485	0.708629	0.466925	0.157798	-0.181323	-0.428321
0.0496146	0.126669	0.167788	0.152996	0.137977	0.177535	0.265882	0.336572	0.34779	0.25222	0.125555	0.0497976	0.00822111	0.010837	0.0137315	0.00911595	-0.0417136	-0.184832	-0.40497	-0.566905	-0.610571	-0.50697	-0.368862	-0.261868	-0.239104	-0.261211	-0.283709	-0.220576	-0.0532335	0.179153	0.395497	0.470627	0.380465	0.157185	-0.058803	-0.146928	-0.0974352	0.00674723	0.122026	0.215926	0.267619	0.31481	0.349258	0.370854	0.344725	0.270265	0.221332	0.171518	0.133537	0.0545358
-0.356879	-0.481788	-0.651466	-0.813229	-0.908858	-0.867281	-0.662829	-0.38327	-0.117732	0.0366166	0.102099	0.105124	0.101302	0.123245	0.117027	0.09218	0.0180236	-0.00260167	0.0251039	0.0966319	0.142683	0.126876	0.0504354	-0.0641002	-0.199415	-0.356525	-0.384417	-0.242845	0.104792	0.419544	0.566887	0.482684	0.288825	0.130907	0.0787799	0.142898	0.296081	0.504114	0.693778	0.81241	0.773108	0.580544	0.291904	0.0272774	-0.121726	-0.219949	-0.221303	-0.177935	-0.0738487	0.0751149
0.16562	0.187536	0.205723	0.211571	0.120942	-0.0348214	-0.259419	-0.510018	-0.731022	-0.844823	-0.772273	-0.51733	-0.113483	0.285182	0.56964	0.645497	0.570954	0.410952	0.272252	0.224982	0.217216	0.207813	0.243809	0.30081	0.406406	0.544193	0.574374	0.491275	0.35381	0.272221	0.238853	0.247595	0.295039	0.370472	0.508873	0.67363	0.78675	0.792485	0.687504	0.446415	0.193879	-0.0266894	-0.11789	-0.143752	-0.150938	-0.139171	-0.143938	-0.173663	-0.208412	-0.287797
0.287766	0.11084	-0.106543	-0.305905	-0.507605	-0.741113	-0.970325	-1.14818	-1.13741	-0.983869	-0.737627	-0.454845	-0.302342	-0.344828	-0.518343	-0.755951	-0.960396	-1.08276	-1.09059	-0.98639	-0.79577	-0.629517	-0.500785	-0.416211	-0.367801	-0.308884	-0.201609	0.0273909	0.420655	0.915962	1.36425	1.67869	1.75362	1.66829	1.44777	1.13964	0.864896	0.714849	0.729368	0.812937	0.92513	0.951863	0.883799	0.695013	0.456557	0.246657	0.0943121	0.0505873	0.1869	0.428645
0.116021	0.012567	-0.13041	-0.246124	-0.325629	-0.325742	-0.239695	-0.128486	-0.0127649	0.111104	0.265516	0.366749	0.403488	0.405917	0.449766	0.58155	0.761331	0.897258	0.919594	0.743877	0.461686	0.244975	0.166071	0.177708	0.22041	0.275926	0.32178	0.391714	0.520009	0.64765	0.658048	0.616586	0.586364	0.564928	0.562092	0.537481	0.478275	0.426535	0.33734	0.26618	0.218897	0.189179	0.18844	0.18829	0.173379	0.0945895	0.0015055	-0.0181878	0.0495865	0.182491
-0.00241565	-0.13807	-0.359239	-0.618896	-0.86046	-1.01898	-1.10823	-1.12965	-1.12102	-1.11253	-1.06497	-0.944543	-0.785378	-0.652422	-0.548197	-0.486884	-0.429611	-0.402627	-0.422152	-0.501478	-0.621187	-0.729206	-0.74304	-0.663594	-0.594845	-0.503011	-0.460701	-0.495454	-0.614066	-0.722554	-0.673971	-0.344675	0.162052	0.740906	1.13322	1.14574	0.860684	0.473684	0.152602	-0.0102307	0.0557882	0.221359	0.389164	0.470346	0.49572	0.488206	0.489073	0.576066	0.674348	0.820926
2.37941	2.56671	2.6781	2.70512	2.58241	2.30643	1.9728	1.56897	1.1424	0.71979	0.347899	0.0927685	0.131408	0.37172	0.658017	0.8624	0.963778	0.956926	0.910185	0.874787	0.840375	0.809613	0.804968	0.863168	0.985679	1.10145	1.13798	1.07185	0.879639	0.696439	0.522352	0.364069	0.0867616	-0.164008	-0.323502	-0.235237	0.0195007	0.334343	0.602664	0.594578	0.367092	0.0136257	-0.295975	-0.409385	-0.361072	-0.2537	-0.206182	-0.263556	-0.363003	-0.425313
0.485737	0.327619	0.136117	-0.0368963	-0.163206	-0.23228	-0.221598	-0.205953	-0.2371	-0.30794	-0.373053	-0.377601	-0.311774	-0.281228	-0.343017	-0.519537	-0.731527	-0.863733	-0.927266	-0.890641	-0.781911	-0.650302	-0.514864	-0.419701	-0.427742	-0.549788	-0.800196	-1.12126	-1.46779	-1.68977	-1.71037	-1.54364	-1.28246	-0.991302	-0.748799	-0.631667	-0.627615	-0.714998	-0.766693	-0.780108	-0.697156	-0.560005	-0.352401	-0.179361	-0.053544	0.0220605	0.0401016	0.0130024	-0.00638102	-0.0224052
-0.409554	-0.420171	-0.405424	-0.360892	-0.240865	-0.0219193	0.232544	0.455787	0.663086	0.768135	0.708066	0.485406	0.163995	-0.188812	-0.4923	-0.728621	-0.899719	-0.972064	-0.976876	-0.848596	-0.572104	-0.223305	0.121145	0.363894	0.494593	0.432432	0.241803	0.0194979	-0.131997	-0.139678	-0.0798256	-0.00839501	0.0279937	0.00438039	-0.0214777	0.00770487	0.0465019	0.0428794	-0.0513346	-0.172991	-0.375969	-0.519482	-0.567747	-0.497528	-0.295516	0.00626293	0.275506	0.405539	0.363921	0.171158
0.545352	0.567763	0.646198	0.672829	0.689708	0.643805	0.503389	0.373028	0.242307	0.177809	0.186394	0.228959	0.23144	0.191917	0.100966	0.030445	0.0369182	0.118459	0.241873	0.355745	0.431709	0.453509	0.502102	0.582857	0.683685	0.779744	0.790048	0.684226	0.483109	0.225168	0.0553101	0.00325654	0.102486	0.324713	0.544	0.683367	0.697753	0.608315	0.515042	0.473722	0.465017	0.51263	0.557505	0.564272	0.523636	0.407214	0.230643	0.023491	-0.158033	-0.274065
-0.971319	-0.980956	-0.932179	-0.816976	-0.558058	-0.197856	0.180938	0.448917	0.615819	0.663829	0.604294	0.482447	0.275839	0.0265213	-0.265661	-0.508322	-0.709707	-0.869113	-1.00756	-1.12481	-1.22104	-1.24107	-1.18218	-1.05886	-0.927884	-0.84147	-0.743961	-0.635427	-0.542708	-0.495635	-0.614119	-0.776641	-0.932343	-0.927475	-0.796535	-0.628976	-0.558179	-0.582227	-0.68645	-0.822493	-0.909235	-0.981909	-1.01394	-0.983933	-0.909448	-0.812182	-0.694433	-0.66297	-0.736389	-0.895303
-0.107441	-0.0562279	-0.0110378	0.0655206	0.115238	0.15288	0.134767	0.0599067	-0.10206	-0.275497	-0.43395	-0.581977	-0.689287	-0.794338	-0.827104	-0.797193	-0.682376	-0.437911	-0.171694	-0.0360187	-0.0787057	-0.310837	-0.598478	-0.786008	-0.828104	-0.728422	-0.551512	-0.369729	-0.223064	-0.119072	-0.112225	-0.138636	-0.148131	-0.128468	-0.0785436	-0.0190107	-0.0385649	-0.184906	-0.420192	-0.621252	-0.728444	-0.683315	-0.614225	-0.501753	-0.388363	-0.305366	-0.318077	-0.43142	-0.615748	-0.770803
0.407363	0.311176	0.117779	-0.128844	-0.344101	-0.451779	-0.456803	-0.393356	-0.323543	-0.27727	-0.249751	-0.212527	-0.102367	0.00264529	0.020963	-0.0694999	-0.228991	-0.385504	-0.542917	-0.679676	-0.850602	-0.939484	-0.962764	-0.895225	-0.801301	-0.687806	-0.561221	-0.42708	-0.271159	-0.0894248	0.115016	0.291408	0.417753	0.407373	0.297722	0.162647	0.104716	0.170976	0.323543	0.503411	0.541202	0.411183	0.16646	-0.0555223	-0.216798	-0.227975	-0.228904	-0.275795	-0.369262	-0.429194
-1.30047	-1.31551	-1.34169	-1.38472	-1.47136	-1.51906	-1.47821	-1.33259	-1.08307	-0.832558	-0.63198	-0.512949	-0.50123	-0.516028	-0.524112	-0.518931	-0.475357	-0.365976	-0.200283	0.0358721	0.26121	0.413566	0.532704	0.623548	0.665867	0.612457	0.529772	0.407043	0.325809	0.313518	0.388966	0.520722	0.621292	0.652237	0.534471	0.283484	-0.0206451	-0.251797	-0.319738	-0.219162	-0.0190586	0.17668	0.368241	0.445065	0.327619	0.0275813	-0.333028	-0.643276	-0.779057	-0.689621
0.252328	0.196093	0.0331364	-0.249519	-0.617351	-0.92368	-1.07343	-0.924252	-0.612407	-0.253343	-0.00690838	0.122206	0.157853	0.18633	0.245363	0.380984	0.530883	0.648457	0.711411	0.784007	0.880163	1.03006	1.15997	1.14828	0.983853	0.78226	0.739925	0.877088	1.13286	1.28952	1.23532	0.964123	0.574111	0.223204	0.0312312	0.0827029	0.271348	0.508904	0.624921	0.5763	0.461704	0.417772	0.470259	0.614113	0.799371	0.909466	0.966835	0.977269	0.938911	0.882463
0.166053	0.0201011	-0.105651	-0.194768	-0.23238	-0.183837	-0.143036	-0.0296519	0.0893611	0.16304	0.131626	0.0493798	0.00356488	0.090134	0.303507	0.536637	0.664298	0.674282	0.549786	0.357448	0.160456	0.0234627	-0.0399918	-0.0947092	-0.179387	-0.258131	-0.320097	-0.340182	-0.308049	-0.269946	-0.182582	-0.0521621	0.112265	0.248102	0.243907	0.140715	-0.037368	-0.236662	-0.380141	-0.474821	-0.612096	-0.78027	-0.892086	-0.877729	-0.738052	-0.510486	-0.295952	-0.197215	-0.200261	-0.226034
0.55768	0.0529464	-0.365114	-0.583797	-0.535904	-0.297926	0.0202985	0.274858	0.344143	0.30605	0.204213	0.0760399	-0.0224629	-0.107881	-0.162472	-0.18964	-0.210192	-0.193766	-0.174854	-0.13045	-0.0352008	0.0275604	-0.0512324	-0.20361	-0.385207	-0.542636	-0.586438	-0.505044	-0.290033	-0.107596	-0.0340027	-0.0933802	-0.224706	-0.354958	-0.428762	-0.498812	-0.544033	-0.573702	-0.5874	-0.600679	-0.626582	-0.693344	-0.786084	-0.860413	-0.852272	-0.82025	-0.78082	-0.765386	-0.825488	-0.946554
-1.26244	-1.20315	-1.19432	-1.29356	-1.44722	-1.58326	-1.6087	-1.51329	-1.31037	-1.14517	-1.07775	-1.08442	-1.11987	-1.10054	-1.05924	-1.02754	-1.06519	-1.17101	-1.30865	-1.43789	-1.50249	-1.46393	-1.27106	-0.97335	-0.650073	-0.554684	-0.725297	-1.05757	-1.36618	-1.521	-1.48262	-1.34834	-1.27412	-1.3605	-1.53806	-1.664	-1.70679	-1.64624	-1.49992	-1.33411	-1.23281	-1.18099	-1.13352	-1.0733	-1.01751	-0.980371	-0.940506	-0.892337	-0.86386	-0.89143
-0.340214	-0.485847	-0.601745	-0.587237	-0.435435	-0.238166	-0.0427291	0.115357	0.178196	0.158253	0.0654593	-0.0537036	-0.148193	-0.195245	-0.182133	-0.0973054	-0.0029078	0.0475057	0.0193241	-0.0178972	-0.0185437	0.0801816	0.215932	0.338505	0.40044	0.461046	0.519582	0.587745	0.603632	0.536089	0.391249	0.202655	0.0278664	-0.095276	-0.12228	-0.152419	-0.142799	-0.12622	-0.059249	0.0518141	0.141206	0.235236	0.279179	0.283664	0.22268	0.0851877	-0.0174176	-0.0943515	-0.141568	-0.152092
-1.46013	-1.20847	-0.935357	-0.688009	-0.453288	-0.278164	-0.19086	-0.187507	-0.276135	-0.37688	-0.443674	-0.431136	-0.369461	-0.305309	-0.240514	-0.225751	-0.24588	-0.267789	-0.218168	-0.139405	-0.0641816	-0.0687511	-0.116509	-0.10123	0.023657	0.262211	0.534616	0.725096	0.701631	0.529304	0.298781	0.144412	0.107544	0.110766	0.145774	0.138795	0.0831929	0.0535836	0.0880071	0.165663	0.163011	0.0524878	-0.101312	-0.187338	-0.188183	-0.0471695	0.128057	0.255893	0.329189	0.364519
-0.177427	-0.314558	-0.424494	-0.490306	-0.477845	-0.348535	-0.18961	-0.0259757	0.048826	0.0129323	-0.124019	-0.227666	-0.227328	-0.168018	-0.084393	0.0114824	0.109171	0.14883	0.073684	-0.163984	-0.51237	-0.82153	-0.983508	-0.905922	-0.624613	-0.315161	-0.0978728	-0.0572591	-0.155166	-0.323023	-0.517173	-0.68488	-0.761472	-0.756047	-0.672019	-0.573802	-0.481189	-0.4936	-0.569475	-0.631791	-0.667951	-0.64578	-0.65124	-0.634236	-0.651839	-0.624724	-0.597454	-0.552396	-0.540671	-0.578775
0.679774	0.53909	0.317649	0.0771727	-0.206578	-0.47972	-0.71525	-0.856198	-0.850247	-0.71746	-0.438322	-0.0960865	0.179129	0.32975	0.397303	0.458517	0.543215	0.613728	0.592541	0.533488	0.450057	0.367283	0.271568	0.141507	0.0443509	-0.14136	-0.385334	-0.635915	-0.799512	-0.760214	-0.547979	-0.229272	0.0898668	0.290691	0.367039	0.348763	0.253245	0.151865	0.0691681	-0.0828972	-0.250454	-0.34135	-0.257385	0.0538657	0.367885	0.521293	0.438586	0.165326	-0.117052	-0.252119
-0.142843	-0.159791	-0.212722	-0.328349	-0.439887	-0.580249	-0.673839	-0.699968	-0.617678	-0.377151	-0.123914	0.0307843	0.0485712	0.00968023	-0.113024	-0.226686	-0.217424	-0.0416411	0.166981	0.404051	0.602472	0.663217	0.599107	0.435898	0.281851	0.165102	0.130085	0.152084	0.17657	0.240207	0.300536	0.365588	0.442297	0.519255	0.65031	0.782081	0.899358	0.982413	1.03335	1.04063	0.967384	0.871761	0.791232	0.733129	0.709743	0.738148	0.75498	0.772614	0.724317	0.58826
0.139506	0.0822368	-0.0536235	-0.184556	-0.265742	-0.285601	-0.213297	-0.111101	0.00695836	0.0816147	0.0866368	0.0521777	-0.00222725	-0.0773784	-0.137248	-0.113171	0.00475019	0.0905959	0.19369	0.262557	0.286649	0.276039	0.275997	0.289618	0.332007	0.386473	0.418066	0.440631	0.405972	0.392266	0.311248	0.179967	-0.0420515	-0.273451	-0.403233	-0.441787	-0.354476	-0.202737	-0.112077	-0.0245691	0.102165	0.19423	0.252894	0.260895	0.202263	0.0940957	-0.0161264	-0.121884	-0.167915	-0.174745
-0.57307	-0.602723	-0.55372	-0.442577	-0.215992	0.100472	0.355547	0.484038	0.449962	0.322965	0.153434	-0.0351604	-0.245762	-0.338034	-0.283771	-0.0307816	0.332485	0.639655	0.735048	0.535483	0.130812	-0.331367	-0.721713	-0.912399	-0.866795	-0.662021	-0.375986	-0.0604802	0.171467	0.22419	0.0725533	-0.185792	-0.455699	-0.588008	-0.588118	-0.51292	-0.419258	-0.329604	-0.263402	-0.176402	-0.0325968	0.192357	0.52085	0.865693	1.07823	1.06678	0.806944	0.393779	-0.0805505	-0.435948
0.934895	0.934615	0.748284	0.444699	0.0707829	-0.213015	-0.284258	-0.11544	0.252464	0.627604	0.901028	1.0006	0.870865	0.674201	0.506436	0.381821	0.217469	-0.0192329	-0.293507	-0.523118	-0.608976	-0.540997	-0.441999	-0.464423	-0.567728	-0.683468	-0.728531	-0.68382	-0.529059	-0.373214	-0.274414	-0.194244	-0.115107	-0.0531803	-0.0328881	-0.0849362	-0.161563	-0.194995	-0.120551	0.0136202	0.141904	0.144448	-0.00261595	-0.192218	-0.317225	-0.270389	-0.0914901	0.180509	0.413	0.548666
-1.20732	-1.08314	-0.936593	-0.815977	-0.714722	-0.712545	-0.731251	-0.749536	-0.757822	-0.750016	-0.75844	-0.730139	-0.671036	-0.576422	-0.476126	-0.330692	-0.270677	-0.293196	-0.430881	-0.625307	-0.80419	-0.853322	-0.78887	-0.657866	-0.505491	-0.355175	-0.249434	-0.139148	-0.038049	0.0377443	0.00970429	-0.104121	-0.223583	-0.314791	-0.432608	-0.561678	-0.632962	-0.676009	-0.591249	-0.442923	-0.199469	0.0722283	0.221201	0.231115	0.108936	-0.127063	-0.362604	-0.616959	-0.809135	-0.909546
-0.104563	-0.249936	-0.379316	-0.48774	-0.552677	-0.57692	-0.524232	-0.417198	-0.22411	-0.0180996	0.171015	0.254344	0.201488	0.0740783	-0.0365865	-0.0733031	-0.00732215	0.117034	0.181982	0.210391	0.209045	0.213191	0.226998	0.229895	0.201761	0.175832	0.138001	0.0782817	-0.00682078	-0.120338	-0.206661	-0.251964	-0.204822	-0.097811	0.00818796	0.110108	0.199797	0.226533	0.132277	-0.0597445	-0.287425	-0.469755	-0.490172	-0.330781	-0.0518488	0.246687	0.406101	0.392676	0.302161	0.204861
-0.0628243	-0.188105	-0.307042	-0.371524	-0.268573	-0.0781398	0.0647916	0.0723239	-0.0988523	-0.378749	-0.728209	-1.0719	-1.3865	-1.62778	-1.81701	-1.92644	-1.97387	-1.96122	-1.95546	-1.96854	-1.93051	-1.86057	-1.74838	-1.61289	-1.43604	-1.27934	-1.12445	-0.970444	-0.896599	-0.869884	-0.911664	-0.99858	-1.06297	-1.05642	-1.08414	-1.15846	-1.22749	-1.2298	-1.14015	-1.02092	-0.846287	-0.738194	-0.746227	-0.885894	-1.05633	-1.23637	-1.366	-1.41482	-1.3988	-1.30679
0.493623	0.479094	0.378901	0.190558	-0.14369	-0.500018	-0.743486	-0.732932	-0.486364	-0.0652527	0.410712	0.723453	0.839543	0.767441	0.606086	0.416238	0.238457	0.108987	0.0118833	-0.023998	0.0376472	0.141733	0.242824	0.268201	0.241486	0.220736	0.196009	0.215429	0.214441	0.144018	0.00376792	-0.187824	-0.397363	-0.617739	-0.764749	-0.719308	-0.520166	-0.319221	-0.185258	-0.186444	-0.317762	-0.460203	-0.60219	-0.674483	-0.666169	-0.575181	-0.420142	-0.196473	0.0532735	0.31806
-0.020046	-0.0183687	-0.0656526	-0.0876323	-0.0236259	0.0519247	0.073587	0.0319603	-0.0421861	-0.0927041	-0.124519	-0.175733	-0.194113	-0.273086	-0.36471	-0.413232	-0.336702	-0.178471	0.0593328	0.284802	0.413934	0.315576	0.00294408	-0.357461	-0.637261	-0.75865	-0.760242	-0.704233	-0.650177	-0.554278	-0.459171	-0.381521	-0.313488	-0.311292	-0.336993	-0.455876	-0.531069	-0.614703	-0.632385	-0.65653	-0.64294	-0.579756	-0.462788	-0.340752	-0.243437	-0.162024	-0.10963	-0.137698	-0.193558	-0.263002
-0.0765704	0.0293034	0.100117	0.0691813	-0.0725605	-0.215265	-0.263614	-0.120645	0.178482	0.469718	0.619676	0.551003	0.324197	0.0420588	-0.262575	-0.491222	-0.595136	-0.426976	-0.138884	0.166593	0.32636	0.274602	-0.01146	-0.450356	-0.814619	-1.03732	-1.06176	-0.993098	-0.886992	-0.844074	-0.841861	-0.858302	-0.827127	-0.722392	-0.607537	-0.570138	-0.617747	-0.714097	-0.747712	-0.674226	-0.502703	-0.364306	-0.29607	-0.263857	-0.24802	-0.201542	-0.188092	-0.265899	-0.43103	-0.568455
-0.868789	-0.913308	-0.954672	-0.964398	-0.990408	-1.03315	-1.12723	-1.11247	-0.950036	-0.644033	-0.267549	0.0857542	0.305606	0.38608	0.361669	0.270826	0.0993937	-0.172177	-0.421906	-0.685879	-0.884168	-1.02301	-1.15445	-1.28334	-1.38469	-1.47988	-1.55059	-1.53237	-1.38962	-1.08682	-0.734171	-0.403343	-0.121057	0.108894	0.23349	0.259722	0.205497	0.115105	-0.027579	-0.173301	-0.302728	-0.409608	-0.481061	-0.540125	-0.544991	-0.536057	-0.431982	-0.309222	-0.153197	-0.0383036
-0.580786	-0.538147	-0.471554	-0.409774	-0.325484	-0.251293	-0.231424	-0.226323	-0.18022	-0.0913752	0.097088	0.326096	0.586139	0.722732	0.717207	0.561917	0.334438	0.168214	0.0342446	-0.0115382	-0.071768	-0.130101	-0.224181	-0.288937	-0.298029	-0.213257	-0.0698964	0.0791343	0.190235	0.1677	0.0831176	0.0222207	0.0370005	0.0994273	0.147131	0.108775	-0.0342717	-0.314809	-0.620609	-0.831799	-0.833773	-0.648575	-0.350581	-0.0515587	0.100096	0.108487	0.072031	0.0932344	0.181011	0.324558
0.502756	0.545672	0.540255	0.520248	0.442988	0.360846	0.256866	0.186247	0.169951	0.161953	0.168146	0.147576	0.133725	0.0350353	-0.133346	-0.329894	-0.503761	-0.597854	-0.598205	-0.462977	-0.201072	0.143072	0.46517	0.629643	0.626275	0.493384	0.28962	0.0975063	-0.0100353	-0.117717	-0.225346	-0.321737	-0.371902	-0.382657	-0.364739	-0.30124	-0.180829	-0.0343099	0.129841	0.301028	0.427355	0.470811	0.427753	0.349282	0.258966	0.154202	0.0444827	-0.0533383	-0.119392	-0.115179
0.164595	0.0943776	0.0303579	-0.120696	-0.284375	-0.423306	-0.467095	-0.386893	-0.165119	0.194264	0.591329	0.932287	1.1046	1.0754	0.852137	0.580263	0.36298	0.166507	-0.0256363	-0.235426	-0.38627	-0.470285	-0.443354	-0.310208	-0.140756	0.0468428	0.207422	0.335148	0.437436	0.553968	0.763594	0.932033	0.995243	0.895804	0.671752	0.341485	0.0756352	-0.102946	-0.159476	-0.177136	-0.211565	-0.258797	-0.318494	-0.287168	-0.206481	-0.104946	-0.112257	-0.227998	-0.476215	-0.730581
0.206655	0.319112	0.347297	0.227314	0.0415551	-0.122109	-0.263872	-0.367048	-0.457575	-0.521907	-0.534219	-0.47096	-0.311815	-0.158477	-0.0682185	-0.076009	-0.14019	-0.193635	-0.222382	-0.19367	-0.125641	-0.0448361	0.0230768	0.0374462	-0.014961	-0.101888	-0.225699	-0.370513	-0.501084	-0.580325	-0.564538	-0.498798	-0.409791	-0.323153	-0.291168	-0.314708	-0.402208	-0.456257	-0.37361	-0.194422	0.0472653	0.252542	0.3065	0.13789	-0.180248	-0.442046	-0.583222	-0.650969	-0.622259	-0.584563
-0.106427	-0.277501	-0.433998	-0.492509	-0.478143	-0.411069	-0.383105	-0.378693	-0.365563	-0.316425	-0.267522	-0.253217	-0.269389	-0.322127	-0.332036	-0.325367	-0.266585	-0.223956	-0.230839	-0.295473	-0.426552	-0.534759	-0.526978	-0.37835	-0.124593	0.174381	0.437277	0.662662	0.769522	0.810982	0.755434	0.578129	0.357606	0.182901	0.0975816	0.0899198	0.114401	0.18464	0.26394	0.325811	0.331525	0.249795	0.146017	0.0854758	0.146697	0.317291	0.570594	0.791812	0.98946	1.05146
1.54815	1.42325	1.33339	1.24518	1.14424	1.03143	0.862597	0.723565	0.547902	0.343478	0.174807	0.0317404	0.0392046	0.195582	0.397726	0.550422	0.628433	0.627705	0.596081	0.525474	0.434818	0.402035	0.384932	0.424328	0.526152	0.60019	0.58477	0.465015	0.26866	0.164494	0.211016	0.43576	0.731827	0.956101	1.01848	0.943878	0.828488	0.719981	0.6017	0.497008	0.37479	0.265807	0.159505	0.11453	0.0794539	0.0637641	0.0362394	0.056556	0.0850484	0.0809349
0.610726	0.401078	0.240583	0.140513	0.152468	0.238683	0.31588	0.263103	0.11544	-0.050203	-0.12639	-0.00863001	0.206992	0.418967	0.545989	0.564431	0.509908	0.438798	0.378689	0.382962	0.43486	0.439293	0.428546	0.39035	0.329869	0.22234	0.10166	0.0182065	-0.0690328	-0.126786	-0.159769	-0.180951	-0.129136	-0.0262468	0.191179	0.451217	0.669513	0.75747	0.73973	0.5901	0.43409	0.382669	0.415533	0.519009	0.541499	0.513225	0.440152	0.399459	0.437474	0.559874
-0.930445	-1.06377	-1.17395	-1.23193	-1.22333	-1.20842	-1.19906	-1.23435	-1.27501	-1.32045	-1.37704	-1.4156	-1.37266	-1.2743	-1.1933	-1.20627	-1.21596	-1.22695	-1.19278	-1.08267	-0.954874	-0.934215	-1.025	-1.15958	-1.32376	-1.41084	-1.38067	-1.27484	-1.18298	-1.20921	-1.30959	-1.43466	-1.45922	-1.41261	-1.32703	-1.30679	-1.35468	-1.40621	-1.43603	-1.44537	-1.42672	-1.45565	-1.5502	-1.58616	-1.4867	-1.21617	-0.836536	-0.544684	-0.431717	-0.497324
0.936233	0.909629	0.897632	0.898779	0.884366	0.861393	0.801175	0.787373	0.771985	0.756313	0.743213	0.629115	0.48502	0.263868	0.0485111	-0.0655458	-0.0417553	0.00477023	0.0500675	-0.0153972	-0.0929654	-0.14644	-0.12028	-0.0186909	0.135751	0.25671	0.411271	0.571911	0.782069	0.983275	1.1447	1.23327	1.20298	1.03614	0.782096	0.498243	0.299462	0.134451	-0.0418192	-0.179359	-0.213266	-0.124668	0.0691281	0.340864	0.608451	0.836676	0.957219	0.962382	0.853109	0.683081
1.1966	1.0451	0.858192	0.668971	0.575242	0.574438	0.640222	0.706743	0.800976	0.939829	1.06397	1.16225	1.25452	1.30053	1.28868	1.21572	1.04892	0.862996	0.690039	0.607994	0.589416	0.555421	0.464894	0.410898	0.417337	0.485391	0.59612	0.634633	0.607855	0.528845	0.490203	0.563381	0.673041	0.787073	0.930642	1.07842	1.22951	1.40049	1.48957	1.46384	1.2888	1.07001	0.8672	0.78475	0.781434	0.879485	0.976017	1.02469	1.00784	0.955368
-0.542749	-0.727465	-0.808883	-0.818781	-0.714884	-0.548588	-0.383296	-0.193303	-0.0340629	0.0997427	0.107785	0.076694	0.0609649	0.121727	0.17542	0.278797	0.409952	0.462263	0.451267	0.366344	0.276325	0.201649	0.073147	-0.0843884	-0.19686	-0.234962	-0.201634	-0.17562	-0.195416	-0.25563	-0.295684	-0.291274	-0.305736	-0.323976	-0.361117	-0.363116	-0.301132	-0.180807	-0.0728714	-0.0229477	-0.104978	-0.27586	-0.407784	-0.440513	-0.3222	-0.151905	-0.0815298	-0.111414	-0.203958	-0.306017
0.547074	0.42934	0.367564	0.379891	0.452691	0.546721	0.576044	0.515107	0.346195	0.109781	-0.156552	-0.349483	-0.435595	-0.409168	-0.315108	-0.186264	-0.0346102	0.139151	0.279648	0.3761	0.432202	0.489285	0.586651	0.716198	0.848075	0.917661	0.914494	0.863496	0.819613	0.818217	0.850225	0.888378	0.89618	0.857698	0.727175	0.552209	0.363877	0.218307	0.146729	0.125899	0.116165	0.0948841	0.0580463	0.0308304	0.0427797	0.0927332	0.151832	0.192423	0.188498	0.142523
-0.176939	-0.175442	-0.145725	-0.101281	-0.113975	-0.261743	-0.5556	-0.938277	-1.30847	-1.64884	-1.94875	-2.2344	-2.52348	-2.79287	-2.99276	-3.11814	-3.18107	-3.18381	-3.11153	-2.99725	-2.89184	-2.73862	-2.63663	-2.52547	-2.44154	-2.38927	-2.38278	-2.37283	-2.30346	-2.18173	-1.92044	-1.64702	-1.30469	-0.987669	-0.741921	-0.556294	-0.510369	-0.571794	-0.66665	-0.720387	-0.685661	-0.483069	-0.0783402	0.475482	1.03096	1.44475	1.64056	1.63773	1.51025	1.31728
-1.04506	-0.718282	-0.386316	-0.0683874	0.193588	0.378599	0.522138	0.613042	0.659907	0.598748	0.456814	0.256451	0.140319	0.138729	0.258954	0.458137	0.649467	0.812563	0.901242	1.03187	1.12732	1.14674	1.08125	0.92977	0.808121	0.761899	0.860736	0.993556	1.11064	1.11219	1.06501	1.02687	1.0093	0.990468	0.966174	0.91674	0.836437	0.807631	0.817825	0.83762	0.831431	0.844678	0.908125	1.00956	1.05153	1.0097	0.884702	0.705745	0.484363	0.213384
1.90758	2.0455	2.22772	2.38244	2.4595	2.49188	2.4486	2.37132	2.21216	1.99514	1.74199	1.49949	1.29657	1.23951	1.27542	1.29719	1.25159	1.15451	1.07571	0.967056	0.881339	0.774427	0.752083	0.815805	0.949987	1.11256	1.25733	1.37335	1.44287	1.53319	1.61354	1.69919	1.82133	1.87398	1.76249	1.50983	1.21108	0.920523	0.740157	0.644206	0.527014	0.392414	0.24105	0.111775	0.0792147	0.14204	0.321712	0.509981	0.598473	0.57317
-1.21142	-1.13352	-1.03791	-1.01251	-1.02258	-1.06731	-1.08083	-1.02028	-0.987091	-1.05534	-1.25251	-1.54879	-1.80289	-1.91918	-1.92689	-1.82026	-1.7563	-1.76456	-1.81706	-1.8815	-1.84775	-1.70515	-1.41075	-1.04885	-0.707086	-0.489861	-0.3398	-0.229081	-0.162168	-0.161571	-0.224436	-0.31346	-0.433545	-0.538288	-0.569123	-0.457574	-0.244227	0.00389596	0.251421	0.45047	0.543424	0.550224	0.490133	0.424616	0.42778	0.418407	0.42975	0.4438	0.52	0.602542
0.874823	1.09405	1.32369	1.44417	1.46802	1.37475	1.20788	0.945703	0.655385	0.348388	0.155448	0.0815345	0.178989	0.365101	0.526452	0.61593	0.591521	0.482439	0.297206	0.178423	0.193838	0.398376	0.7568	1.15445	1.46902	1.66177	1.70201	1.5851	1.34117	1.09341	0.925681	0.90324	0.975263	1.08806	1.20356	1.29396	1.42891	1.59566	1.78472	1.88682	1.85273	1.67196	1.43288	1.23149	1.13412	1.09945	1.09726	1.07073	1.04252	1.05542
-0.483014	-0.41345	-0.382331	-0.319799	-0.240944	-0.147723	-0.111527	-0.194629	-0.411083	-0.731484	-1.08453	-1.42463	-1.6805	-1.95539	-2.22124	-2.42708	-2.52424	-2.53113	-2.55164	-2.62971	-2.85588	-3.19281	-3.4994	-3.68333	-3.72509	-3.63286	-3.4764	-3.31586	-3.18577	-3.14809	-3.13863	-3.15081	-3.1575	-3.15234	-3.12186	-3.02244	-2.8782	-2.6024	-2.30612	-1.98241	-1.76242	-1.62863	-1.60443	-1.63505	-1.71508	-1.80363	-1.85539	-1.86691	-1.79294	-1.67428
0.416562	0.438566	0.525011	0.745137	0.970598	1.15163	1.24396	1.28561	1.37931	1.48208	1.56561	1.58294	1.51661	1.382	1.22348	1.09548	1.07755	1.15566	1.2528	1.3534	1.38226	1.23005	0.967197	0.721483	0.578986	0.602868	0.733103	0.933941	1.20379	1.43412	1.53636	1.46436	1.28151	1.12983	1.12779	1.27527	1.54271	1.88807	2.18161	2.32285	2.31784	2.26311	2.25698	2.31594	2.40856	2.51547	2.59026	2.65747	2.75277	2.81617
0.184909	0.394024	0.549582	0.558555	0.41875	0.179559	-0.105739	-0.361452	-0.504457	-0.542037	-0.526757	-0.472248	-0.461943	-0.417662	-0.3687	-0.251061	-0.0499004	0.190295	0.385302	0.45888	0.411346	0.29292	0.107806	-0.0194516	-0.0786905	-0.0543542	0.0391889	0.149341	0.219224	0.261837	0.287343	0.350787	0.448668	0.53113	0.560741	0.587727	0.656949	0.837841	1.1189	1.40546	1.56961	1.59006	1.4938	1.33052	1.15533	0.982575	0.860151	0.802879	0.773938	0.725847
0.69417	0.911184	1.0971	1.23528	1.26171	1.18862	1.02561	0.818304	0.582664	0.38015	0.268941	0.243333	0.261284	0.246208	0.149388	0.0404661	-0.0081679	0.0304532	0.0538802	-0.0354636	-0.17745	-0.33327	-0.457845	-0.473827	-0.351534	-0.0962124	0.191411	0.39974	0.534618	0.639301	0.81127	0.963388	1.08808	1.14296	1.18601	1.22308	1.31306	1.37071	1.35283	1.30414	1.20803	1.12159	1.054	0.943582	0.831871	0.73805	0.758107	0.919142	1.19247	1.39903
-0.621847	-0.643157	-0.646326	-0.626441	-0.608442	-0.581463	-0.550299	-0.506553	-0.505732	-0.617458	-0.784636	-0.942647	-1.0894	-1.1857	-1.23308	-1.18658	-1.08875	-0.960584	-0.803167	-0.619318	-0.414152	-0.208011	-0.0322218	0.102152	0.226063	0.295217	0.323818	0.295925	0.24507	0.210317	0.18508	0.188409	0.11901	-0.0165689	-0.238171	-0.429359	-0.504894	-0.420851	-0.208992	0.0282142	0.227442	0.268167	0.158585	-0.0144086	-0.167298	-0.271482	-0.364155	-0.44728	-0.549571	-0.534696
-0.145351	-0.225448	-0.339315	-0.470502	-0.573381	-0.574551	-0.495655	-0.412771	-0.38116	-0.423971	-0.544647	-0.66198	-0.732656	-0.716847	-0.653598	-0.583289	-0.545376	-0.538082	-0.575185	-0.663246	-0.806212	-0.961327	-1.09043	-1.21465	-1.25306	-1.2057	-1.08911	-0.941921	-0.874442	-0.880234	-0.940394	-0.99706	-0.971408	-0.825841	-0.645924	-0.451955	-0.273867	-0.126181	-0.0192488	0.0773862	0.169167	0.19371	0.195614	0.188677	0.206305	0.227368	0.198828	0.129685	0.053649	-0.0294494
0.520846	0.566359	0.631382	0.719656	0.835157	0.927832	0.962606	0.921714	0.885454	0.86486	0.884062	0.918335	0.907561	0.849349	0.731879	0.589879	0.510609	0.473972	0.467139	0.487693	0.500092	0.421105	0.274474	0.0511296	-0.192904	-0.444336	-0.612184	-0.743063	-0.794971	-0.85386	-0.917081	-1.01552	-1.12602	-1.20688	-1.21924	-1.17206	-1.05378	-0.896402	-0.737823	-0.622552	-0.610328	-0.665429	-0.748009	-0.837615	-0.877194	-0.888168	-0.901724	-0.950432	-1.00892	-1.0509
0.101169	0.0355979	-0.106414	-0.282116	-0.46483	-0.610927	-0.747786	-0.916253	-1.15316	-1.45735	-1.79663	-2.07332	-2.23604	-2.30806	-2.29329	-2.27149	-2.26212	-2.25808	-2.27804	-2.31567	-2.35277	-2.37633	-2.37052	-2.3805	-2.41338	-2.44518	-2.44178	-2.37834	-2.32937	-2.3674	-2.50705	-2.67438	-2.83048	-2.92573	-2.92227	-2.84291	-2.67254	-2.47002	-2.27521	-2.18685	-2.199	-2.28532	-2.36474	-2.40894	-2.41685	-2.36571	-2.28583	-2.16787	-2.04336	-1.90925
0.83689	0.803064	0.794258	0.724219	0.637476	0.516906	0.394025	0.353717	0.41959	0.552604	0.708122	0.867898	1.00557	1.14026	1.15862	1.15523	1.05893	0.82744	0.549738	0.280563	0.0605225	-0.0905789	-0.179563	-0.248233	-0.301513	-0.33294	-0.319342	-0.327563	-0.359893	-0.346529	-0.243329	-0.00767971	0.273418	0.486417	0.549114	0.416534	0.24252	0.114696	0.0262593	0.00641642	-0.0154097	-0.0659272	-0.175542	-0.333456	-0.423497	-0.402081	-0.30356	-0.132521	0.101515	0.339401
-1.30864	-1.40902	-1.53832	-1.6813	-1.82596	-1.93251	-2.013	-2.05764	-2.0814	-2.09692	-2.10516	-2.08699	-2.03823	-1.99512	-2.00663	-2.06832	-2.18778	-2.34355	-2.50104	-2.62815	-2.71283	-2.74222	-2.72941	-2.68105	-2.59251	-2.48586	-2.37503	-2.25888	-2.13161	-1.9815	-1.81972	-1.67564	-1.55926	-1.46838	-1.42005	-1.41845	-1.45476	-1.52263	-1.57952	-1.62193	-1.62916	-1.61932	-1.6152	-1.59772	-1.57052	-1.50252	-1.413	-1.36318	-1.37638	-1.4481
-0.272297	-0.361978	-0.450916	-0.48869	-0.466229	-0.410082	-0.38729	-0.399549	-0.390498	-0.323375	-0.173365	-0.023233	0.0782144	0.0387539	-0.0814196	-0.203333	-0.26607	-0.211412	-0.105776	0.0477563	0.217285	0.383046	0.541106	0.696727	0.768004	0.724607	0.549774	0.332155	0.14914	0.0109692	-0.137825	-0.252328	-0.242901	-0.102901	0.176734	0.555064	0.91359	1.18926	1.32056	1.35468	1.41627	1.52577	1.66914	1.87522	2.06487	2.22823	2.31888	2.28961	2.1119	1.89536
-1.26248	-1.3107	-1.38697	-1.50293	-1.62836	-1.72735	-1.77429	-1.75999	-1.70555	-1.63782	-1.56212	-1.48425	-1.39999	-1.34035	-1.32251	-1.3606	-1.43139	-1.50177	-1.5512	-1.56897	-1.56684	-1.54327	-1.49295	-1.41436	-1.28428	-1.10441	-0.875118	-0.620141	-0.36793	-0.142284	0.0267142	0.132618	0.202929	0.233469	0.202457	0.0950016	-0.0916625	-0.341255	-0.613294	-0.866701	-1.05886	-1.16753	-1.17933	-1.10303	-0.963961	-0.771907	-0.536325	-0.280727	-0.0170251	0.227155
-1.16387	-1.10642	-1.05626	-1.02184	-1.01536	-1.02077	-1.02982	-1.02898	-1.03366	-1.04461	-1.05973	-1.07132	-1.07437	-1.07847	-1.08744	-1.09985	-1.10712	-1.11028	-1.10136	-1.09516	-1.08825	-1.07686	-1.067	-1.03905	-0.983067	-0.905445	-0.840608	-0.816541	-0.869549	-0.981816	-1.08597	-1.15001	-1.16563	-1.18503	-1.22925	-1.28602	-1.3603	-1.4578	-1.55211	-1.63733	-1.70059	-1.73568	-1.72321	-1.65648	-1.54837	-1.42453	-1.31072	-1.23964	-1.21903	-1.22338
0.0604206	0.0744652	0.079484	0.0915563	0.114689	0.164288	0.223649	0.295359	0.391866	0.513295	0.605381	0.668601	0.68836	0.671139	0.633759	0.573043	0.520269	0.484203	0.4238	0.314217	0.114637	-0.141492	-0.395902	-0.605518	-0.757676	-0.846198	-0.892673	-0.87226	-0.765813	-0.59758	-0.345196	-0.0232429	0.370685	0.857202	1.42106	2.01354	2.53782	2.91975	3.13292	3.14574	3.01109	2.77921	2.48648	2.18173	1.88513	1.67244	1.61419	1.72211	1.98083	2.28966
-0.0689812	-0.219309	-0.357016	-0.4555	-0.500532	-0.481998	-0.419933	-0.32453	-0.210701	-0.0869768	0.0558472	0.195792	0.31396	0.395312	0.445711	0.499995	0.581989	0.686605	0.795206	0.875729	0.90175	0.893247	0.863485	0.833657	0.808844	0.791783	0.779711	0.763208	0.735548	0.711114	0.702121	0.709022	0.728954	0.751801	0.768947	0.774209	0.761063	0.740472	0.693	0.601164	0.460398	0.285922	0.116545	-0.034828	-0.154526	-0.232552	-0.270927	-0.254337	-0.199637	-0.0986894
1.53665	1.57253	1.61149	1.63812	1.64056	1.61239	1.56337	1.49766	1.43508	1.37082	1.29429	1.1966	1.07006	0.946882	0.843409	0.784606	0.740314	0.679102	0.586232	0.458126	0.322649	0.205361	0.13635	0.130022	0.199588	0.346708	0.570182	0.833318	1.10351	1.3629	1.55651	1.68435	1.76708	1.80523	1.82473	1.83952	1.85713	1.87375	1.86648	1.83409	1.77531	1.70233	1.63999	1.6256	1.67902	1.78158	1.91768	2.0521	2.14276	2.16605
-1.1917	-1.16396	-1.10286	-1.01011	-0.894637	-0.809888	-0.800977	-0.886975	-1.04254	-1.20305	-1.30355	-1.30835	-1.24883	-1.15755	-1.07437	-1.00958	-0.956474	-0.920495	-0.887861	-0.873402	-0.85928	-0.858972	-0.851085	-0.829543	-0.783418	-0.705959	-0.601936	-0.51749	-0.461763	-0.432314	-0.437909	-0.46796	-0.534049	-0.601769	-0.67145	-0.717548	-0.761371	-0.808768	-0.880787	-0.942051	-0.919395	-0.772335	-0.511967	-0.208007	0.0764349	0.280472	0.404025	0.44483	0.434219	0.399308
0.135091	0.0814686	0.061295	0.0746685	0.105074	0.124606	0.127826	0.112589	0.0846852	0.0487083	0.00700361	-0.0558798	-0.119183	-0.18699	-0.26448	-0.337745	-0.412776	-0.470619	-0.517911	-0.548615	-0.553947	-0.521452	-0.482409	-0.463642	-0.469128	-0.505149	-0.549665	-0.609584	-0.654159	-0.678705	-0.707309	-0.755931	-0.817803	-0.872791	-0.919888	-0.929898	-0.897783	-0.841881	-0.809082	-0.803059	-0.809578	-0.82695	-0.854653	-0.860177	-0.807661	-0.696005	-0.567607	-0.487469	-0.481562	-0.520881
-0.104209	-0.112426	-0.128004	-0.165311	-0.216712	-0.265624	-0.307652	-0.350676	-0.417898	-0.532809	-0.680538	-0.824406	-0.911613	-0.894148	-0.773504	-0.579155	-0.350898	-0.123633	0.0573259	0.138591	0.0916791	-0.0650273	-0.265577	-0.463195	-0.63103	-0.755828	-0.844874	-0.896472	-0.924142	-0.93197	-0.934531	-0.921726	-0.893894	-0.849605	-0.805893	-0.779355	-0.774074	-0.765578	-0.71352	-0.587395	-0.391425	-0.154688	0.0628724	0.223622	0.309215	0.343693	0.349305	0.351911	0.378783	0.409673
-0.641821	-0.349465	0.016134	0.421178	0.805981	1.09954	1.27066	1.33141	1.35421	1.36822	1.39521	1.42686	1.45817	1.48487	1.49224	1.48194	1.45416	1.37372	1.21982	0.983291	0.669599	0.319432	-0.0297666	-0.334719	-0.587873	-0.792174	-0.955213	-1.07346	-1.13505	-1.13531	-1.08535	-1.00354	-0.916969	-0.844783	-0.799712	-0.779208	-0.772307	-0.770735	-0.754686	-0.700246	-0.6244	-0.556013	-0.513684	-0.497465	-0.488922	-0.462985	-0.402694	-0.327711	-0.255972	-0.195503
-0.57762	-0.615369	-0.654612	-0.686523	-0.716469	-0.726732	-0.769295	-0.879681	-1.07142	-1.33246	-1.60081	-1.8148	-1.95522	-1.99636	-1.97132	-1.92985	-1.89396	-1.8766	-1.88083	-1.84365	-1.76521	-1.66168	-1.61411	-1.65861	-1.7673	-1.86641	-1.9166	-1.89365	-1.7962	-1.65973	-1.4749	-1.24891	-1.00243	-0.754087	-0.53205	-0.377157	-0.285544	-0.260817	-0.282461	-0.319618	-0.351225	-0.348295	-0.306165	-0.232579	-0.134688	-0.00511982	0.154762	0.326059	0.452745	0.500871
-2.76696	-2.6152	-2.42123	-2.20138	-1.97745	-1.76334	-1.55975	-1.36185	-1.17513	-1.0175	-0.890812	-0.789575	-0.688808	-0.554231	-0.406101	-0.292601	-0.283815	-0.414126	-0.643186	-0.894585	-1.10629	-1.24729	-1.32428	-1.35802	-1.36728	-1.36661	-1.36948	-1.33773	-1.25188	-1.12352	-0.995876	-0.91649	-0.913212	-0.939349	-0.902139	-0.742914	-0.487671	-0.246158	-0.0976556	-0.0723111	-0.197432	-0.428003	-0.656782	-0.796702	-0.775345	-0.624442	-0.404984	-0.192376	-0.0613378	-0.0182054
1.43254	1.39963	1.37423	1.34801	1.32894	1.32322	1.32532	1.32948	1.33251	1.32534	1.30504	1.27394	1.23	1.18108	1.14119	1.10212	1.01889	0.834243	0.514259	0.0586132	-0.467472	-0.972766	-1.38739	-1.64584	-1.74516	-1.69041	-1.50521	-1.19807	-0.804671	-0.418717	-0.102157	0.126639	0.274805	0.376536	0.498581	0.688051	0.971304	1.31928	1.67225	1.97752	2.20258	2.33978	2.4144	2.42784	2.40387	2.36387	2.31434	2.23942	2.16367	2.08656
-0.511775	-0.442594	-0.30644	-0.123306	0.026213	0.0824024	0.055623	0.0507438	0.138715	0.30175	0.502979	0.606859	0.549679	0.34647	0.0625445	-0.222638	-0.420483	-0.555754	-0.622671	-0.621483	-0.64419	-0.64359	-0.577021	-0.444305	-0.265144	-0.129649	-0.0357873	0.0367773	0.0631241	0.0337634	-0.0293971	-0.151327	-0.315786	-0.479286	-0.604185	-0.659791	-0.709301	-0.81625	-0.939446	-0.981471	-0.91907	-0.710457	-0.40859	-0.104576	0.212	0.483574	0.680626	0.751397	0.662574	0.439505
0.0965701	-0.0126947	-0.0264205	0.0196923	0.0843448	0.0750218	-0.0980279	-0.391738	-0.681674	-0.845799	-0.799405	-0.581969	-0.281891	0.0220225	0.255707	0.357128	0.314433	0.0886607	-0.283658	-0.627989	-0.862443	-0.867254	-0.735053	-0.544838	-0.353104	-0.202551	-0.0048036	0.259219	0.435408	0.477686	0.422248	0.286902	0.194136	0.203883	0.267833	0.36494	0.417239	0.435135	0.470447	0.520409	0.627703	0.785054	0.9928	1.10458	1.1714	1.21965	1.2267	1.28848	1.40428	1.5607
0.351878	0.154647	-0.0218342	-0.190477	-0.359882	-0.517599	-0.632233	-0.639284	-0.577545	-0.520933	-0.486242	-0.510585	-0.55128	-0.650491	-0.750727	-0.841904	-0.856303	-0.809967	-0.742786	-0.75005	-0.860411	-1.02747	-1.20875	-1.30134	-1.33277	-1.21466	-0.996502	-0.674851	-0.340001	0.0370244	0.281463	0.450923	0.521692	0.527682	0.579332	0.672706	0.784885	0.903124	1.01537	1.08394	1.15638	1.18427	1.22854	1.26488	1.26091	1.25331	1.19699	1.09648	0.953803	0.734624
-0.396894	-0.327578	-0.253665	-0.199245	-0.160707	-0.169937	-0.201958	-0.213072	-0.118363	0.124288	0.484917	0.895569	1.2629	1.56047	1.69875	1.68917	1.53868	1.32861	1.08921	0.85829	0.673578	0.543807	0.464504	0.415068	0.416116	0.394608	0.324586	0.205021	0.0875225	-0.0128933	-0.0525256	-0.0732201	-0.0716543	-0.0813288	-0.121863	-0.151734	-0.147387	-0.149104	-0.0968163	-0.0141648	0.0685837	0.138017	0.161292	0.184126	0.228863	0.262284	0.339588	0.385644	0.369093	0.311674
-0.231742	-0.172676	-0.185049	-0.232688	-0.351875	-0.441894	-0.441111	-0.39187	-0.292597	-0.322483	-0.540894	-0.885019	-1.24985	-1.5067	-1.60535	-1.50215	-1.22555	-0.806298	-0.359593	0.0443723	0.339329	0.499889	0.542721	0.476538	0.379168	0.346338	0.427225	0.627704	0.916417	1.27954	1.60945	1.87812	2.01468	2.05757	2.00763	1.88374	1.65712	1.39952	1.17289	1.04214	1.01023	1.02713	1.06417	1.07445	1.0608	0.982104	0.857712	0.724206	0.671956	0.715588
-0.564808	-0.597559	-0.653572	-0.752434	-0.861633	-0.956818	-0.988819	-0.969675	-0.855998	-0.704757	-0.585519	-0.551043	-0.640704	-0.808508	-0.967674	-1.04993	-1.07073	-1.0709	-1.06715	-1.08368	-1.11451	-1.1169	-1.03265	-0.883493	-0.761034	-0.79376	-0.986981	-1.26623	-1.44186	-1.38816	-1.10161	-0.739435	-0.394213	-0.187379	-0.0173318	0.127819	0.265592	0.29124	0.226215	0.108426	-0.067504	-0.153869	-0.134894	0.0234304	0.250373	0.53353	0.742761	0.869957	0.879101	0.864034
-0.533579	-0.64167	-0.757602	-0.99026	-1.3364	-1.7986	-2.2199	-2.55175	-2.66519	-2.4574	-2.07567	-1.59191	-1.19489	-0.983905	-0.986809	-1.12466	-1.31173	-1.45603	-1.54151	-1.53646	-1.50749	-1.53248	-1.57587	-1.54371	-1.38715	-1.0786	-0.713965	-0.407543	-0.202189	-0.159606	-0.164361	-0.121863	0.035626	0.256101	0.591954	0.978679	1.43001	1.85376	2.15677	2.25261	2.17689	1.9889	1.78052	1.61229	1.44562	1.30874	1.15321	1.00638	0.897426	0.812253
0.591392	0.536012	0.470475	0.374779	0.296753	0.251764	0.246647	0.265659	0.293223	0.284967	0.250082	0.236089	0.284868	0.381722	0.437264	0.410798	0.309706	0.211686	0.181697	0.217238	0.239374	0.199582	0.114796	0.0705876	0.0651477	0.12974	0.14881	0.100605	0.0194086	-0.0180094	0.0339644	0.159098	0.386775	0.645695	0.861449	1.02003	1.16248	1.29945	1.4923	1.72789	1.95395	2.12524	2.19425	2.10152	1.84257	1.48179	1.14815	0.934124	0.825413	0.806641
-0.319258	-0.219294	-0.183543	-0.143404	-0.182156	-0.294633	-0.448622	-0.597422	-0.707442	-0.779888	-0.772272	-0.731458	-0.670583	-0.652142	-0.653271	-0.687922	-0.756852	-0.815573	-0.860143	-0.922716	-1.04543	-1.1889	-1.27642	-1.26687	-1.18578	-1.06942	-0.939736	-0.789496	-0.657629	-0.538052	-0.421885	-0.26717	-0.0651869	0.126083	0.313234	0.469223	0.572531	0.636421	0.718352	0.81472	0.955166	1.07605	1.1128	1.04905	0.905723	0.80865	0.79993	0.823932	0.861685	0.872731
-0.319112	-0.267843	-0.248633	-0.214485	-0.18661	-0.149054	-0.0895019	-0.00783199	0.120134	0.258762	0.414988	0.604631	0.814256	0.975155	1.04043	1.03786	0.92573	0.777088	0.592443	0.499356	0.459669	0.498486	0.613199	0.740371	0.818539	0.827638	0.846564	0.92695	1.05095	1.14011	1.10806	0.936202	0.62703	0.322991	0.116376	0.0617312	0.159692	0.370939	0.619311	0.897477	1.11746	1.24346	1.26186	1.21691	1.15951	1.12662	1.02002	0.891505	0.759851	0.64451
0.664964	0.500381	0.448238	0.432202	0.483769	0.535251	0.637049	0.77607	0.887531	0.925569	0.944489	0.971842	1.01824	1.09405	1.08054	0.894022	0.537783	0.100102	-0.314105	-0.613129	-0.85918	-1.04946	-1.21974	-1.31949	-1.26762	-1.10397	-0.831808	-0.544744	-0.223868	0.00453533	0.136912	0.226456	0.335841	0.470906	0.590936	0.707882	0.843239	0.981983	1.08887	1.15925	1.16726	1.28169	1.51599	1.83313	2.22091	2.58416	2.90491	3.11638	3.11757	2.89101
0.774611	0.695265	0.517217	0.255746	-0.0769703	-0.375677	-0.574073	-0.617071	-0.48876	-0.223159	0.152578	0.527909	0.827893	1.04738	1.12934	1.10481	0.937493	0.624128	0.308552	0.0750498	-0.0687277	-0.102465	-0.0322996	0.101325	0.217047	0.278739	0.282212	0.21073	0.0194147	-0.260611	-0.514219	-0.724071	-0.823731	-0.836725	-0.757853	-0.601978	-0.31458	0.0451002	0.344846	0.493242	0.488472	0.464131	0.470068	0.495008	0.551672	0.564142	0.531065	0.478913	0.449417	0.425058
-1.1058	-1.06982	-0.992332	-0.861465	-0.710934	-0.594613	-0.490543	-0.35945	-0.306267	-0.279568	-0.310935	-0.38232	-0.429378	-0.392257	-0.250325	0.0402334	0.359628	0.572964	0.574375	0.375775	0.166931	0.0206419	0.00916752	0.0359427	0.0679707	0.0855718	0.0628453	0.026353	-0.0761641	-0.214458	-0.348814	-0.416517	-0.475581	-0.588573	-0.760521	-0.948985	-1.03637	-1.02392	-0.860793	-0.619558	-0.303249	-0.0470506	0.138653	0.251122	0.312391	0.325169	0.347212	0.400852	0.454711	0.507223
0.630411	0.698017	0.789728	0.848905	0.788077	0.57122	0.255139	-0.0724145	-0.354921	-0.648134	-0.946243	-1.24473	-1.5102	-1.68913	-1.69892	-1.60145	-1.44358	-1.30316	-1.22683	-1.17814	-1.14487	-1.11011	-1.02673	-0.857386	-0.631159	-0.355238	-0.0950189	0.0863062	0.200022	0.203342	0.0850498	-0.122061	-0.377972	-0.592779	-0.738134	-0.764796	-0.708727	-0.555525	-0.359344	-0.125486	0.0538344	0.0811852	0.0142768	-0.133975	-0.317138	-0.543786	-0.761454	-0.853143	-0.734789	-0.420294
-0.154696	-0.220795	-0.236296	-0.234016	-0.140573	0.0107568	0.208349	0.392711	0.485138	0.491098	0.443525	0.355144	0.320297	0.416518	0.641375	0.911818	1.07403	1.06264	0.90231	0.681706	0.470159	0.286622	0.141621	0.0660628	0.0440125	0.0915099	0.250602	0.426883	0.557345	0.585088	0.528624	0.457678	0.46545	0.563729	0.692757	0.779379	0.807893	0.827861	0.820269	0.829768	0.839497	0.89432	0.960021	1.05817	1.10234	1.0648	0.956727	0.832603	0.750329	0.727757
0.895462	0.924414	0.917747	0.865003	0.832353	0.811344	0.838563	0.892244	0.931037	0.937382	0.90848	0.831404	0.749361	0.707603	0.678386	0.640445	0.570388	0.409979	0.20556	0.0287852	-0.0289516	0.0106267	0.0278889	-0.0382033	-0.191681	-0.401916	-0.610485	-0.752152	-0.835081	-0.846315	-0.811771	-0.77115	-0.761735	-0.751586	-0.749512	-0.675615	-0.550844	-0.451706	-0.420939	-0.460788	-0.482184	-0.427654	-0.317996	-0.145372	0.0169444	0.121763	0.154974	0.1217	0.048653	-0.0470747
1.30801	1.26045	1.22965	1.24694	1.281	1.29281	1.21734	1.05725	0.855072	0.632773	0.446349	0.282037	0.134941	-0.0610184	-0.30455	-0.58446	-0.857236	-1.0643	-1.17659	-1.21034	-1.18714	-1.13085	-1.07488	-1.0666	-1.09177	-1.14231	-1.17225	-1.18151	-1.10941	-0.984964	-0.873703	-0.765639	-0.661638	-0.468909	-0.159055	0.274989	0.744846	1.09975	1.15148	0.944642	0.562838	0.151933	-0.201767	-0.5352	-0.879266	-1.21493	-1.47078	-1.59301	-1.6037	-1.54543
-0.468516	-0.515061	-0.509381	-0.460168	-0.419375	-0.415695	-0.497763	-0.610824	-0.693658	-0.718621	-0.69518	-0.657623	-0.634762	-0.611979	-0.600376	-0.600052	-0.618662	-0.6357	-0.630434	-0.62412	-0.612412	-0.593091	-0.576921	-0.57413	-0.596104	-0.645621	-0.709284	-0.73356	-0.694213	-0.571255	-0.38197	-0.141834	0.0444205	0.123493	0.0973897	-0.0109535	-0.20738	-0.47402	-0.785224	-1.1533	-1.50938	-1.75165	-1.84081	-1.81176	-1.65689	-1.44303	-1.23096	-1.11272	-1.07369	-1.07476
-2.53491	-2.56972	-2.65044	-2.76347	-2.88428	-2.9749	-3.00479	-2.96004	-2.85309	-2.66242	-2.38299	-2.03211	-1.64149	-1.24523	-0.888071	-0.61393	-0.453963	-0.390813	-0.373854	-0.357499	-0.296815	-0.194407	-0.0856544	0.000647549	0.0662342	0.150907	0.301344	0.49351	0.702157	0.887265	1.02548	1.11563	1.17256	1.21148	1.23712	1.24014	1.20658	1.1354	1.02315	0.88131	0.741128	0.631105	0.579448	0.584322	0.625797	0.661509	0.680099	0.678754	0.663497	0.624872
-0.0876597	0.144478	0.383022	0.575615	0.715593	0.828396	0.916049	0.961336	0.944696	0.900727	0.869114	0.878855	0.917104	0.953164	0.922047	0.784339	0.517136	0.161802	-0.195908	-0.464571	-0.54497	-0.434937	-0.195906	0.0667706	0.251401	0.287222	0.167276	-0.0129076	-0.182357	-0.30256	-0.434267	-0.566764	-0.636275	-0.594641	-0.453723	-0.269704	-0.144873	-0.154935	-0.3485	-0.710914	-1.14081	-1.53243	-1.81299	-1.96109	-2.00727	-2.02244	-2.03012	-2.04445	-2.04421	-1.99635
0.425757	0.531111	0.655033	0.800937	0.987595	1.2182	1.48656	1.74031	1.93028	1.99936	1.92744	1.72831	1.45592	1.17545	0.980288	0.93365	1.02249	1.19472	1.39398	1.57497	1.70736	1.81111	1.9057	1.99317	2.06009	2.09173	2.07544	2.01366	1.91767	1.80535	1.69517	1.60659	1.5487	1.52732	1.54767	1.61277	1.70636	1.7713	1.78389	1.74921	1.70789	1.70086	1.72562	1.77437	1.83131	1.87868	1.89914	1.89125	1.85273	1.79523
1.27794	1.3624	1.47915	1.59699	1.65269	1.60897	1.45789	1.21926	0.951398	0.69893	0.464661	0.285313	0.167969	0.119573	0.148655	0.185117	0.225574	0.248331	0.236156	0.164181	-0.00588044	-0.28657	-0.607938	-0.851588	-0.941306	-0.857035	-0.667098	-0.476447	-0.369859	-0.340808	-0.32668	-0.263731	-0.105028	0.144804	0.442013	0.738819	0.970642	1.09459	1.09371	0.980988	0.805574	0.63854	0.521927	0.464834	0.460606	0.480009	0.533511	0.601263	0.673665	0.727273
0.878764	0.914183	0.971271	1.03414	1.09439	1.13152	1.13851	1.13105	1.1169	1.10001	1.08883	1.06591	1.02052	0.936176	0.806903	0.639561	0.435601	0.198427	-0.067142	-0.345357	-0.613262	-0.858351	-1.07104	-1.25514	-1.41532	-1.53864	-1.58944	-1.53948	-1.39605	-1.20384	-1.03219	-0.936846	-0.933666	-0.991841	-1.06813	-1.12817	-1.18787	-1.26996	-1.39944	-1.57209	-1.74484	-1.87164	-1.92815	-1.91213	-1.85502	-1.79665	-1.75039	-1.72866	-1.71777	-1.70437
2.08405	2.07329	2.05253	2.01745	1.9531	1.8685	1.73218	1.52498	1.22173	0.814254	0.313138	-0.25247	-0.845197	-1.4112	-1.93197	-2.38969	-2.7579	-3.0292	-3.2346	-3.39492	-3.57096	-3.71096	-3.71372	-3.52189	-3.12261	-2.59303	-2.04623	-1.61251	-1.31856	-1.11574	-0.928509	-0.707155	-0.44308	-0.161318	0.0791748	0.249965	0.340052	0.344613	0.272852	0.14838	-0.00717684	-0.163023	-0.278751	-0.322981	-0.288578	-0.192276	-0.0910154	-0.0193882	-0.0116063	-0.115305
-1.26616	-1.43574	-1.64278	-1.87041	-2.09477	-2.29083	-2.42783	-2.47159	-2.42517	-2.33769	-2.27476	-2.30236	-2.45018	-2.69605	-3.025	-3.39938	-3.76795	-4.08448	-4.31035	-4.42272	-4.39971	-4.23487	-3.89217	-3.34861	-2.61299	-1.77173	-0.93397	-0.193454	0.361134	0.737028	0.996851	1.2155	1.43648	1.64608	1.81967	1.91138	1.89218	1.75192	1.53502	1.29969	1.11128	1.03373	1.06952	1.14464	1.19715	1.16623	1.0824	0.962238	0.830583	0.718309
0.450651	0.428982	0.398517	0.363624	0.337215	0.324183	0.329108	0.34183	0.355942	0.366939	0.375831	0.383452	0.392966	0.399534	0.402519	0.398388	0.390787	0.384221	0.380144	0.378233	0.373242	0.361031	0.338031	0.315848	0.299125	0.289075	0.286549	0.294712	0.306775	0.325275	0.346398	0.367256	0.381644	0.391048	0.39191	0.383319	0.362153	0.336171	0.31024	0.286265	0.2633	0.238484	0.208647	0.175934	0.146433	0.124455	0.115378	0.123583	0.142963	0.16468
-2.35396	-2.40887	-2.4863	-2.57118	-2.64815	-2.712	-2.79875	-2.94883	-3.18346	-3.47779	-3.77977	-4.02453	-4.18312	-4.25302	-4.23106	-4.15803	-4.07156	-4.00854	-3.98676	-3.99799	-4.02264	-4.02563	-3.97976	-3.86396	-3.68208	-3.46106	-3.2408	-3.045	-2.87949	-2.72214	-2.54179	-2.31838	-2.03216	-1.68566	-1.31749	-0.972638	-0.696089	-0.525245	-0.458088	-0.478299	-0.554421	-0.654121	-0.756284	-0.834635	-0.869108	-0.855838	-0.82012	-0.813616	-0.865665	-0.995737
-1.50316	-1.48039	-1.43582	-1.40117	-1.38097	-1.39275	-1.4268	-1.46896	-1.51308	-1.55009	-1.56899	-1.58853	-1.62264	-1.64326	-1.64905	-1.62616	-1.58549	-1.53447	-1.47149	-1.39349	-1.31529	-1.26393	-1.24879	-1.28142	-1.32609	-1.36301	-1.37943	-1.39319	-1.42838	-1.52769	-1.68402	-1.83535	-1.94485	-1.97077	-1.90934	-1.77885	-1.63017	-1.54037	-1.53175	-1.6105	-1.72612	-1.83192	-1.8642	-1.84091	-1.8149	-1.80018	-1.80106	-1.79198	-1.76509	-1.71177
-1.07377	-1.2164	-1.31704	-1.36271	-1.28738	-1.171	-1.06359	-1.01685	-1.06682	-1.13301	-1.10805	-1.06093	-1.03719	-1.11253	-1.26305	-1.38582	-1.44221	-1.45526	-1.38319	-1.26037	-1.13313	-1.02459	-0.978128	-0.982803	-0.966724	-0.961965	-0.901558	-0.825081	-0.752886	-0.744349	-0.737234	-0.704016	-0.605115	-0.507422	-0.454836	-0.478354	-0.508918	-0.543142	-0.536699	-0.583953	-0.693759	-0.884019	-1.07148	-1.16497	-1.09317	-0.970262	-0.831596	-0.746991	-0.776484	-0.886486
0.336325	0.400386	0.458416	0.485264	0.470758	0.39404	0.30232	0.26	0.258686	0.328339	0.370211	0.332869	0.150742	-0.0871804	-0.288349	-0.386547	-0.421226	-0.438707	-0.413515	-0.388494	-0.324451	-0.300289	-0.328601	-0.414843	-0.408063	-0.247892	-0.0587878	0.108365	0.157128	0.17977	0.170479	0.181851	0.193168	0.181714	0.102203	-0.000127654	-0.0648989	0.0166815	0.174291	0.285429	0.265426	0.0666352	-0.284909	-0.606644	-0.781873	-0.780459	-0.626867	-0.430594	-0.232837	-0.0599421
-0.285312	-0.576188	-0.892904	-1.10656	-1.15284	-1.04559	-0.895932	-0.829758	-0.897955	-1.05215	-1.17462	-1.22695	-1.18441	-1.01791	-0.771899	-0.619146	-0.664944	-0.83047	-1.13121	-1.40962	-1.54829	-1.49266	-1.29989	-1.11608	-1.04357	-1.08757	-1.29843	-1.56502	-1.75545	-1.80618	-1.72516	-1.68195	-1.6538	-1.66532	-1.68098	-1.73448	-1.83535	-2.00981	-2.26181	-2.52713	-2.80728	-3.00826	-3.03085	-2.88025	-2.62396	-2.28076	-1.9757	-1.76747	-1.70244	-1.87778
0.614323	0.508085	0.36015	0.166559	0.00151299	-0.0974174	-0.142193	-0.124418	-0.104697	-0.103741	-0.0918869	-0.0915858	-0.104869	-0.153227	-0.238305	-0.31494	-0.339575	-0.266729	-0.0948421	0.154661	0.372479	0.540539	0.596791	0.618669	0.586967	0.552179	0.508523	0.420821	0.293559	0.184789	0.119264	0.115289	0.1908	0.26438	0.290626	0.276097	0.213459	0.120586	0.000861766	-0.131056	-0.284533	-0.417948	-0.530879	-0.58135	-0.593816	-0.562029	-0.51429	-0.464487	-0.456673	-0.480439
0.31039	0.170477	-0.00657959	-0.243773	-0.457987	-0.699149	-0.920725	-1.07431	-1.14367	-1.07623	-1.01105	-1.03152	-1.15845	-1.35664	-1.5295	-1.61298	-1.64177	-1.66332	-1.71916	-1.73223	-1.60266	-1.38011	-1.12213	-0.945731	-0.925317	-1.04468	-1.17145	-1.20416	-1.13217	-0.957355	-0.726224	-0.474886	-0.320189	-0.338072	-0.507594	-0.750152	-1.01024	-1.22054	-1.35707	-1.43779	-1.44613	-1.41087	-1.35718	-1.23615	-1.12026	-1.03457	-0.996195	-1.02245	-1.09885	-1.27589
0.218828	0.295135	0.363545	0.402829	0.404556	0.376991	0.292805	0.203978	0.175066	0.13816	0.126597	0.146625	0.194112	0.146933	0.0536923	-0.108267	-0.231076	-0.324521	-0.382504	-0.464789	-0.581092	-0.716494	-0.77392	-0.788259	-0.800787	-0.865195	-0.988428	-1.06468	-1.0903	-1.08266	-1.09097	-1.03154	-0.958969	-0.76973	-0.600381	-0.476532	-0.498384	-0.67661	-0.942337	-1.22483	-1.48775	-1.59724	-1.53207	-1.30011	-1.00725	-0.77876	-0.713692	-0.743655	-0.839512	-0.927098
-0.189023	-0.172381	-0.214506	-0.260251	-0.299457	-0.293687	-0.191768	-0.0657599	0.0741105	0.142882	0.198936	0.211879	0.202504	0.202386	0.217424	0.218525	0.202306	0.165903	0.0917318	0.0493914	-0.00560614	-0.0388557	-0.135923	-0.27549	-0.429827	-0.520862	-0.456124	-0.263926	-0.0848108	-0.00602663	-0.0965963	-0.32226	-0.587691	-0.783865	-0.853104	-0.766286	-0.585614	-0.355376	-0.158489	-0.0670754	-0.112023	-0.268943	-0.471482	-0.658634	-0.701059	-0.54463	-0.270177	-0.00105133	0.133408	0.12917
1.56356	1.50508	1.45628	1.41619	1.38599	1.41753	1.46438	1.54228	1.61147	1.63603	1.5768	1.48916	1.42565	1.38528	1.43887	1.51903	1.52094	1.42375	1.21352	0.891362	0.552871	0.244153	0.0678278	0.0315948	0.0418794	-0.000357362	-0.0816483	-0.178665	-0.256699	-0.299986	-0.298538	-0.247801	-0.137861	0.038465	0.169685	0.268695	0.351908	0.390119	0.357181	0.200905	0.0247318	-0.0996763	-0.143745	-0.0848276	-0.0168757	0.0105423	-0.000141575	-0.084759	-0.26013	-0.410927
-0.208797	-0.200017	-0.122175	0.0604626	0.278404	0.419634	0.506717	0.514526	0.485672	0.497787	0.526236	0.591601	0.69241	0.842412	1.01649	1.10197	0.983635	0.762778	0.500704	0.308469	0.220713	0.20456	0.236403	0.275183	0.278648	0.218539	0.167755	0.195874	0.371403	0.615547	0.78921	0.797201	0.637126	0.495718	0.488452	0.599863	0.679562	0.710884	0.626651	0.435522	0.220827	0.0299171	-0.0293008	-0.0232932	-0.00758044	-0.0546875	-0.20847	-0.418832	-0.617049	-0.715249
0.580001	0.390971	0.233889	0.0812627	-0.093068	-0.309774	-0.543324	-0.70766	-0.764025	-0.738061	-0.633956	-0.492075	-0.381546	-0.260453	-0.164197	-0.108299	-0.115407	-0.185032	-0.369427	-0.55525	-0.74456	-0.860397	-0.890857	-0.893852	-0.920918	-1.01714	-1.16485	-1.32006	-1.41858	-1.44206	-1.41024	-1.36696	-1.32995	-1.31603	-1.3423	-1.42342	-1.59276	-1.70773	-1.7331	-1.67671	-1.61099	-1.60987	-1.69484	-1.87624	-2.0683	-2.17455	-2.15277	-2.05413	-2.01101	-2.08482
-0.367169	-0.495085	-0.635826	-0.742385	-0.781009	-0.813179	-0.851791	-0.898694	-0.94608	-0.952917	-0.89796	-0.866736	-0.817995	-0.746975	-0.585485	-0.393784	-0.216866	-0.175189	-0.237209	-0.364751	-0.464546	-0.545781	-0.599372	-0.597139	-0.528564	-0.391442	-0.341731	-0.420829	-0.669102	-0.997023	-1.22032	-1.24462	-1.01954	-0.699889	-0.42922	-0.236377	-0.0401963	0.115677	0.196514	0.157001	-0.0644063	-0.388594	-0.737438	-0.978071	-1.03433	-0.913178	-0.711389	-0.511697	-0.392228	-0.439833
1.19788	1.27414	1.37561	1.47121	1.58699	1.68044	1.71464	1.66888	1.58087	1.46895	1.32743	1.20877	1.04205	0.834717	0.630578	0.534362	0.49421	0.402907	0.214199	-0.0701251	-0.309994	-0.433569	-0.366048	-0.143993	0.0756515	0.231692	0.284706	0.264717	0.181881	0.0654448	-0.0270459	-0.104573	-0.0860155	-0.0722174	-0.130136	-0.322797	-0.584585	-0.826624	-0.934651	-0.903235	-0.802727	-0.662204	-0.548799	-0.542745	-0.595983	-0.646413	-0.657219	-0.558858	-0.442596	-0.329031
0.406326	0.2688	0.12708	-0.0177962	-0.150053	-0.212873	-0.255044	-0.291299	-0.289265	-0.24603	-0.112067	0.0757582	0.279235	0.390876	0.406055	0.27069	0.0710996	-0.126296	-0.294418	-0.336115	-0.278994	-0.113421	0.0499967	0.181138	0.205201	0.154197	0.035835	-0.13996	-0.302063	-0.499942	-0.65509	-0.725294	-0.696588	-0.533132	-0.365948	-0.255568	-0.211424	-0.223899	-0.212441	-0.0897919	0.0166095	0.0878237	0.0839587	0.0475428	0.000887418	-0.0374445	-0.132901	-0.307033	-0.612164	-0.983533
0.633525	0.455966	0.250626	0.0257837	-0.178222	-0.283893	-0.334576	-0.295058	-0.189909	-0.0288621	0.11582	0.225058	0.239591	0.131446	-0.00899362	-0.164629	-0.328211	-0.459715	-0.621846	-0.830199	-1.02648	-1.10187	-0.994649	-0.73988	-0.470429	-0.297928	-0.283197	-0.356242	-0.419667	-0.408773	-0.357622	-0.342462	-0.367575	-0.386257	-0.345186	-0.264114	-0.193802	-0.188863	-0.210549	-0.265416	-0.237116	-0.13436	-0.0178904	0.0348301	0.0700593	0.086975	0.0563369	-0.00143429	-0.092854	-0.154713
-0.417478	-0.468958	-0.49236	-0.500974	-0.408224	-0.276056	-0.136047	-0.0413137	-0.00901069	-0.00203424	-0.058205	-0.137348	-0.181582	-0.202963	-0.20689	-0.147397	-0.089612	-0.012466	0.0283981	0.0049447	-0.0261846	-0.0639527	-0.0708093	-0.0838953	-0.117748	-0.178367	-0.254859	-0.368055	-0.492831	-0.68259	-0.872184	-1.01088	-1.05136	-1.01789	-0.973681	-0.949651	-0.979538	-0.977877	-0.91335	-0.748845	-0.579625	-0.484131	-0.527099	-0.675276	-0.824144	-0.920733	-0.939563	-0.972254	-1.01647	-1.02486
-0.965237	-0.991732	-0.978476	-0.98333	-0.98092	-0.971947	-0.977666	-0.947803	-0.858592	-0.670575	-0.418424	-0.203408	-0.0539201	-0.00841445	-0.0613066	-0.11813	-0.137793	-0.110796	-0.0228975	0.122011	0.226624	0.304116	0.22989	0.0592105	-0.182539	-0.424954	-0.581356	-0.553783	-0.399223	-0.132806	0.0922576	0.192063	0.0795953	-0.126846	-0.294096	-0.222126	0.0786171	0.457785	0.720019	0.756605	0.550857	0.175285	-0.261608	-0.608141	-0.809313	-0.806414	-0.645269	-0.392116	-0.220471	-0.163117
-0.409831	-0.338637	-0.230813	-0.0859081	0.0432124	0.102556	0.0625785	-0.0483596	-0.183259	-0.266423	-0.321044	-0.336378	-0.353627	-0.383723	-0.502255	-0.703673	-0.926453	-1.03556	-1.03291	-0.910964	-0.779177	-0.687139	-0.658812	-0.592241	-0.470518	-0.342996	-0.22529	-0.229731	-0.344083	-0.555047	-0.783468	-0.970456	-0.992994	-0.820768	-0.534116	-0.334794	-0.315282	-0.496577	-0.694038	-0.807121	-0.788832	-0.686873	-0.619585	-0.605109	-0.623605	-0.615698	-0.547578	-0.422501	-0.357402	-0.30726
-0.314856	-0.235841	-0.174306	-0.138335	-0.131108	-0.220609	-0.399123	-0.604253	-0.743487	-0.696574	-0.491027	-0.21187	0.0560221	0.249713	0.35824	0.518933	0.786878	1.02901	1.21206	1.14196	0.880435	0.585337	0.361541	0.275099	0.260428	0.276913	0.301729	0.351855	0.357152	0.372977	0.400873	0.339248	0.259061	0.165287	0.0768212	-0.0288528	-0.130197	-0.247468	-0.35644	-0.506694	-0.627408	-0.679684	-0.605925	-0.452905	-0.274336	-0.158968	-0.0826124	-0.0536791	-0.0219002	0.0301465
-0.39725	-0.824223	-1.21405	-1.4997	-1.62904	-1.6157	-1.56453	-1.51402	-1.4959	-1.4623	-1.44442	-1.42169	-1.31707	-1.15196	-0.980399	-0.859061	-0.832986	-0.893963	-0.951082	-1.0044	-1.03774	-1.09021	-1.15905	-1.23643	-1.2757	-1.26547	-1.20734	-1.14608	-1.14005	-1.15409	-1.20818	-1.22552	-1.24454	-1.20367	-1.12704	-0.980637	-0.80745	-0.64553	-0.520091	-0.469753	-0.480334	-0.581898	-0.754887	-0.939557	-1.1163	-1.29955	-1.46671	-1.54595	-1.54628	-1.47868
-3.46204	-3.49652	-3.53414	-3.56548	-3.58479	-3.58681	-3.57747	-3.56195	-3.55131	-3.54345	-3.5401	-3.53122	-3.51726	-3.49603	-3.46486	-3.42341	-3.37535	-3.31196	-3.22011	-3.09062	-2.92611	-2.7407	-2.55811	-2.40295	-2.2861	-2.20836	-2.16339	-2.14526	-2.15587	-2.18899	-2.23161	-2.27729	-2.32019	-2.35714	-2.3914	-2.42397	-2.45741	-2.49229	-2.53035	-2.56797	-2.60085	-2.62428	-2.63772	-2.6436	-2.63955	-2.62552	-2.61498	-2.62046	-2.64803	-2.69242
1.76765	1.77487	1.744	1.65046	1.47072	1.20728	0.890443	0.572174	0.295223	0.0784959	-0.0716164	-0.164944	-0.217788	-0.239961	-0.230796	-0.187666	-0.122516	-0.0519328	0.00151995	0.027274	0.0229487	0.000308753	-0.028333	-0.0425562	-0.0237639	0.0488351	0.185743	0.384073	0.612861	0.830886	1.01367	1.15366	1.26239	1.35376	1.44638	1.53373	1.59541	1.61595	1.57809	1.48481	1.36178	1.2579	1.20727	1.21418	1.26393	1.33858	1.40632	1.44285	1.43359	1.38411
-0.379438	-0.405399	-0.435545	-0.454057	-0.446673	-0.409642	-0.342451	-0.262604	-0.182275	-0.121098	-0.086324	-0.0693805	-0.0615548	-0.0525045	-0.0498886	-0.0676234	-0.103385	-0.122866	-0.0728539	0.0817037	0.316353	0.571893	0.783417	0.918907	0.976909	0.992302	0.991505	0.988666	0.968964	0.921345	0.835827	0.717819	0.580766	0.456593	0.371184	0.340098	0.349334	0.370767	0.369432	0.329657	0.24691	0.135018	0.0219376	-0.0719991	-0.130779	-0.165634	-0.181531	-0.188639	-0.193245	-0.201341
-2.27276	-2.30041	-2.33017	-2.34724	-2.34298	-2.31929	-2.28154	-2.24441	-2.19508	-2.13468	-2.0654	-2.00024	-1.94468	-1.9062	-1.87017	-1.82196	-1.72912	-1.57048	-1.35551	-1.12383	-0.933075	-0.805302	-0.743566	-0.716872	-0.718141	-0.734399	-0.761748	-0.780475	-0.740759	-0.617902	-0.431934	-0.228691	-0.0797713	-0.0244186	-0.0701772	-0.172482	-0.292088	-0.40186	-0.497753	-0.584886	-0.660024	-0.722307	-0.763812	-0.79384	-0.830055	-0.900724	-1.00201	-1.11309	-1.20678	-1.26726
-2.37712	-2.52077	-2.61816	-2.6519	-2.62445	-2.56465	-2.50503	-2.46071	-2.44417	-2.41846	-2.3666	-2.27722	-2.13283	-1.93594	-1.70963	-1.48898	-1.30426	-1.19328	-1.18718	-1.28183	-1.4475	-1.63018	-1.77382	-1.84176	-1.82121	-1.72446	-1.58282	-1.3797	-1.09847	-0.718366	-0.284104	0.124991	0.432284	0.583333	0.567412	0.405713	0.165988	-0.0865506	-0.301128	-0.447596	-0.525601	-0.555876	-0.584105	-0.64527	-0.753178	-0.873251	-0.985335	-1.05334	-1.08409	-1.12329
2.18832	2.08762	1.8956	1.58756	1.15983	0.668884	0.18385	-0.214939	-0.490214	-0.636799	-0.666848	-0.594977	-0.459653	-0.309254	-0.171744	-0.0629176	0.0293656	0.108486	0.174812	0.21174	0.201176	0.125459	-0.0102848	-0.173168	-0.30113	-0.334458	-0.254179	-0.0769638	0.142849	0.365484	0.587917	0.814773	1.02651	1.1959	1.28785	1.29109	1.22726	1.11987	0.979861	0.809534	0.620174	0.448637	0.321255	0.239932	0.190292	0.14956	0.10098	0.040954	-0.0193811	-0.0759244
-1.90405	-1.89621	-1.87704	-1.87154	-1.90512	-1.99203	-2.15412	-2.39764	-2.69137	-2.98585	-3.24213	-3.42015	-3.49409	-3.45769	-3.34595	-3.21501	-3.1096	-3.02852	-2.94657	-2.82316	-2.6348	-2.38293	-2.10038	-1.83848	-1.61948	-1.45651	-1.34232	-1.26747	-1.21269	-1.15727	-1.07576	-0.94176	-0.739226	-0.469783	-0.218	-0.0511778	-0.0361441	-0.157836	-0.372796	-0.616617	-0.844496	-1.01935	-1.1427	-1.22229	-1.27065	-1.30182	-1.33208	-1.36083	-1.40286	-1.44041
-2.12721	-2.00286	-1.86455	-1.74251	-1.63096	-1.515	-1.36306	-1.16207	-0.91831	-0.661755	-0.451335	-0.319748	-0.273267	-0.299465	-0.381051	-0.485927	-0.564011	-0.5668	-0.486031	-0.342382	-0.174005	-0.0355365	0.0296322	0.0128369	-0.076417	-0.197395	-0.264492	-0.167484	0.155155	0.685664	1.31335	1.86251	2.21248	2.30244	2.14128	1.80372	1.41276	1.07386	0.83017	0.662454	0.544693	0.465318	0.423013	0.412396	0.432958	0.479039	0.530913	0.564159	0.573697	0.572132
-1.04085	-1.20584	-1.41516	-1.67426	-1.96679	-2.25324	-2.50244	-2.68135	-2.8027	-2.88599	-2.93658	-2.95202	-2.88755	-2.73027	-2.50921	-2.2858	-2.10921	-2.00883	-1.97538	-2.00126	-2.07297	-2.17797	-2.29213	-2.37716	-2.40642	-2.37969	-2.30312	-2.19249	-2.05911	-1.88476	-1.63779	-1.3442	-1.06621	-0.863246	-0.771734	-0.780148	-0.868386	-1.00339	-1.17556	-1.37755	-1.5795	-1.7504	-1.88796	-1.99602	-2.09423	-2.17738	-2.24029	-2.2807	-2.30672	-2.31594
-2.25807	-2.37191	-2.52497	-2.70754	-2.8981	-3.05921	-3.17869	-3.25367	-3.28357	-3.26862	-3.21909	-3.14932	-3.06636	-2.9709	-2.87855	-2.80081	-2.75625	-2.74249	-2.76489	-2.81842	-2.89451	-2.98801	-3.0962	-3.18524	-3.2081	-3.11684	-2.92286	-2.67801	-2.4393	-2.27731	-2.22503	-2.27044	-2.38114	-2.53072	-2.68863	-2.8191	-2.90601	-2.9632	-3.0156	-3.07838	-3.14579	-3.21597	-3.28713	-3.34897	-3.39548	-3.4266	-3.44491	-3.45739	-3.47147	-3.49123
1.51612	1.44754	1.3695	1.28217	1.19446	1.09904	0.987477	0.85291	0.694116	0.52673	0.365059	0.212308	0.0794782	-0.0309568	-0.128878	-0.188431	-0.188728	-0.11567	0.031591	0.229449	0.428496	0.58257	0.650748	0.623203	0.504086	0.295703	0.0204589	-0.294836	-0.621167	-0.934652	-1.19098	-1.3651	-1.44768	-1.44866	-1.40583	-1.36969	-1.37453	-1.4357	-1.54272	-1.67504	-1.79564	-1.85991	-1.81414	-1.64962	-1.37986	-1.06345	-0.796292	-0.645587	-0.608323	-0.641209
-0.833749	-0.790538	-0.738715	-0.68547	-0.630874	-0.57784	-0.522719	-0.468472	-0.415126	-0.372321	-0.35152	-0.366925	-0.420748	-0.488115	-0.55072	-0.575675	-0.541911	-0.445439	-0.312523	-0.173964	-0.0653019	0.00947246	0.0639086	0.106171	0.137847	0.152355	0.156407	0.151495	0.140019	0.126139	0.114905	0.105688	0.0929034	0.0660977	0.0294347	-0.000788691	-0.0237418	-0.049608	-0.098095	-0.191616	-0.322761	-0.469655	-0.603088	-0.701682	-0.764264	-0.789965	-0.785457	-0.755539	-0.703599	-0.639412
-2.49259	-2.57053	-2.61845	-2.61187	-2.53558	-2.40395	-2.23746	-2.06203	-1.89312	-1.74259	-1.62805	-1.55832	-1.52796	-1.51066	-1.47734	-1.4098	-1.31686	-1.22425	-1.16091	-1.15062	-1.20126	-1.29226	-1.39343	-1.47277	-1.50595	-1.47246	-1.36399	-1.18761	-0.986808	-0.807335	-0.689191	-0.658344	-0.715019	-0.825722	-0.945819	-1.05198	-1.14456	-1.23207	-1.31457	-1.39176	-1.45378	-1.49477	-1.5158	-1.52915	-1.54341	-1.56467	-1.59002	-1.61435	-1.63157	-1.63902
-1.6686	-1.61336	-1.52761	-1.41187	-1.28647	-1.17453	-1.1019	-1.0754	-1.08331	-1.11301	-1.14779	-1.19275	-1.2477	-1.30764	-1.35374	-1.36174	-1.30608	-1.18799	-1.01953	-0.839556	-0.6906	-0.605735	-0.574964	-0.582874	-0.588361	-0.567769	-0.507295	-0.416518	-0.313078	-0.226677	-0.171323	-0.183623	-0.279798	-0.449607	-0.66405	-0.880487	-1.06615	-1.20329	-1.30762	-1.39903	-1.48196	-1.54601	-1.57421	-1.54536	-1.45155	-1.31127	-1.15727	-1.02362	-0.931548	-0.888607
-0.538743	-0.850227	-1.19425	-1.50354	-1.69435	-1.70512	-1.56903	-1.37414	-1.22823	-1.19277	-1.25739	-1.35529	-1.4483	-1.49308	-1.45646	-1.36075	-1.21277	-1.06933	-0.963293	-0.891425	-0.870764	-0.833999	-0.700018	-0.439197	-0.0363715	0.471263	1.02699	1.55795	1.96249	2.1492	2.05381	1.69183	1.19867	0.731234	0.372821	0.15451	0.0193725	-0.0740685	-0.166554	-0.266917	-0.348867	-0.399586	-0.372852	-0.27219	-0.155888	-0.0645743	-0.0506801	-0.139669	-0.299459	-0.47831
0.274717	0.191358	0.0949912	-0.0127485	-0.143843	-0.293053	-0.471446	-0.665169	-0.858596	-1.03284	-1.179	-1.30804	-1.43984	-1.5893	-1.74665	-1.90064	-2.0115	-2.06726	-2.06716	-2.02716	-1.97989	-1.94739	-1.94068	-1.94878	-1.96063	-1.96229	-1.96686	-1.98123	-2.00328	-2.02941	-2.02846	-1.95616	-1.78529	-1.51579	-1.19208	-0.901543	-0.709921	-0.683617	-0.82387	-1.08	-1.36356	-1.6	-1.75734	-1.84371	-1.88905	-1.92503	-1.97927	-2.04606	-2.13276	-2.20631
-0.632466	-0.763667	-0.884859	-0.978303	-1.0221	-1.01994	-0.9928	-0.964288	-0.930978	-0.885928	-0.838197	-0.806983	-0.788884	-0.770867	-0.742609	-0.704848	-0.65661	-0.61074	-0.592069	-0.622246	-0.703362	-0.831037	-0.95785	-1.02882	-1.00842	-0.903639	-0.757872	-0.602699	-0.454308	-0.292946	-0.10785	0.0848813	0.217432	0.240565	0.143364	-0.0256039	-0.195466	-0.320422	-0.393976	-0.436067	-0.456537	-0.468067	-0.469005	-0.45754	-0.443806	-0.436807	-0.440871	-0.455946	-0.47869	-0.503992
0.2219	0.257771	0.298704	0.330633	0.338391	0.302064	0.224659	0.12576	0.0390511	-0.00409231	0.0116581	0.0778876	0.180947	0.292972	0.397787	0.48891	0.551968	0.557903	0.488289	0.362394	0.211416	0.0805534	0.0155095	0.0485715	0.17466	0.353439	0.538623	0.691061	0.797933	0.876051	0.942431	1.02461	1.12054	1.20529	1.24109	1.20499	1.10313	0.954162	0.780829	0.613506	0.462787	0.348035	0.273006	0.234339	0.209929	0.193577	0.191825	0.205751	0.220888	0.222501
0.107006	0.0709986	0.0324617	-0.00208058	-0.045899	-0.0968264	-0.152124	-0.202118	-0.244247	-0.266448	-0.2888	-0.310101	-0.319618	-0.301116	-0.244895	-0.161777	-0.0720708	0.0382131	0.208403	0.460049	0.770077	1.08613	1.30926	1.41742	1.39608	1.25851	1.0689	0.893557	0.802419	0.787817	0.804759	0.810079	0.785153	0.737843	0.720407	0.787413	0.949146	1.1805	1.37957	1.47122	1.45931	1.38231	1.28471	1.20201	1.15047	1.14024	1.15932	1.19809	1.23629	1.26932
-0.258697	-0.27143	-0.268183	-0.233595	-0.157852	-0.0397323	0.0806977	0.16005	0.173251	0.129868	0.0479793	-0.0384496	-0.111249	-0.170996	-0.220817	-0.252148	-0.262685	-0.232695	-0.159736	-0.0569931	0.0538738	0.156296	0.236585	0.26529	0.242858	0.19435	0.129411	0.054505	-0.0282355	-0.113405	-0.196819	-0.266512	-0.32402	-0.378405	-0.439814	-0.506513	-0.566363	-0.604339	-0.621232	-0.620673	-0.613276	-0.607767	-0.592017	-0.552052	-0.472458	-0.350061	-0.212227	-0.0887115	0.0017646	0.0509445
-0.886528	-0.877122	-0.839998	-0.783945	-0.708796	-0.629281	-0.559455	-0.519206	-0.495611	-0.480662	-0.456713	-0.409948	-0.344346	-0.268982	-0.199991	-0.147694	-0.104771	-0.0537428	0.0113541	0.0687708	0.0964563	0.0640785	-0.0218016	-0.139245	-0.252681	-0.347244	-0.416968	-0.46362	-0.483757	-0.48013	-0.465656	-0.452928	-0.462891	-0.508055	-0.579844	-0.672299	-0.759512	-0.829232	-0.873389	-0.895908	-0.899641	-0.890601	-0.873494	-0.854356	-0.835451	-0.817451	-0.802339	-0.795093	-0.794346	-0.794315
-1.54092	-1.56156	-1.55943	-1.51258	-1.42073	-1.29811	-1.16834	-1.05515	-0.968364	-0.902519	-0.848502	-0.798748	-0.757706	-0.742354	-0.758444	-0.807636	-0.879419	-0.961506	-1.034	-1.08444	-1.10878	-1.12089	-1.12831	-1.12971	-1.10497	-1.02723	-0.89286	-0.715721	-0.542695	-0.405439	-0.31805	-0.268386	-0.2248	-0.174676	-0.131253	-0.111452	-0.13115	-0.183903	-0.261745	-0.347791	-0.43058	-0.500452	-0.558122	-0.597764	-0.624628	-0.642994	-0.652291	-0.656353	-0.647094	-0.632004
-0.790935	-0.784233	-0.771689	-0.750317	-0.723121	-0.693483	-0.672648	-0.666196	-0.672343	-0.694251	-0.7248	-0.773288	-0.833612	-0.899611	-0.955209	-0.986459	-0.985455	-0.9528	-0.906593	-0.85394	-0.794669	-0.719434	-0.63724	-0.553204	-0.477868	-0.417373	-0.37901	-0.354267	-0.312645	-0.238043	-0.134429	-0.0270749	0.0678396	0.138438	0.189222	0.239016	0.285193	0.297352	0.259888	0.179628	0.0854597	0.00874936	-0.0449806	-0.0818563	-0.110821	-0.134585	-0.15667	-0.169153	-0.185594	-0.204999
-0.719668	-0.656487	-0.580774	-0.489357	-0.403614	-0.331379	-0.284983	-0.259135	-0.245606	-0.249225	-0.254989	-0.248658	-0.222221	-0.175767	-0.13424	-0.138198	-0.203933	-0.327526	-0.480873	-0.613731	-0.688189	-0.677506	-0.589373	-0.437327	-0.23852	-0.009944	0.217445	0.415217	0.579332	0.704172	0.788307	0.841385	0.862992	0.860221	0.830289	0.763764	0.662968	0.546831	0.421084	0.296711	0.171731	0.0463102	-0.0687081	-0.159987	-0.217771	-0.248107	-0.25851	-0.268506	-0.285866	-0.310268
-1.60751	-1.65547	-1.71409	-1.78451	-1.85153	-1.90763	-1.9476	-1.96269	-1.94657	-1.89814	-1.81388	-1.70338	-1.59229	-1.50589	-1.45467	-1.4277	-1.40409	-1.37653	-1.33982	-1.3142	-1.31455	-1.35153	-1.42014	-1.50114	-1.5521	-1.54061	-1.46673	-1.34282	-1.19181	-1.02917	-0.872714	-0.729971	-0.606115	-0.507975	-0.439371	-0.392732	-0.368189	-0.370124	-0.398168	-0.433542	-0.461955	-0.475427	-0.491798	-0.531991	-0.615867	-0.734476	-0.861858	-0.96845	-1.0271	-1.04231
1.60743	1.49336	1.34839	1.19474	1.06019	0.950414	0.876561	0.823643	0.795207	0.804852	0.851185	0.92434	0.995258	1.03918	1.04948	1.04774	1.05603	1.10908	1.21146	1.3543	1.49797	1.58859	1.6196	1.58824	1.52726	1.45197	1.38405	1.32889	1.29008	1.25944	1.24102	1.23757	1.24947	1.26171	1.25854	1.25775	1.25962	1.24807	1.21304	1.13028	1.00835	0.872116	0.760636	0.691564	0.653848	0.631795	0.616438	0.608047	0.607945	0.612507
0.114577	0.0226447	-0.101485	-0.242405	-0.359288	-0.390573	-0.309881	-0.125644	0.10232	0.355374	0.613451	0.882451	1.14367	1.39167	1.5964	1.77474	1.92975	2.04387	2.12439	2.18205	2.25223	2.35034	2.50039	2.70382	2.90632	3.041	3.08774	3.07731	3.06293	3.05133	3.05046	3.03138	2.9717	2.84693	2.66771	2.44336	2.19399	1.9503	1.73549	1.56333	1.41329	1.29034	1.20391	1.1696	1.16693	1.15671	1.13837	1.10461	1.07579	1.06782
0.58585	0.627618	0.707534	0.826502	0.973942	1.12851	1.26663	1.35308	1.37076	1.30716	1.17631	0.999797	0.823907	0.68525	0.594947	0.544966	0.50043	0.441778	0.366771	0.292625	0.236181	0.201898	0.17009	0.12893	0.0830279	0.0533668	0.0589503	0.115985	0.20627	0.335111	0.485501	0.617433	0.703933	0.738031	0.728059	0.690675	0.648702	0.621151	0.596279	0.546844	0.453701	0.324271	0.186701	0.085124	0.032298	0.0192208	0.0186308	0.0128228	0.000728927	-0.0111455
1.21068	1.20792	1.21403	1.22957	1.25615	1.29097	1.31982	1.32044	1.28092	1.18767	1.04507	0.869014	0.674327	0.477957	0.279517	0.0744742	-0.119592	-0.283524	-0.40737	-0.500535	-0.575369	-0.641876	-0.69631	-0.735337	-0.760534	-0.764899	-0.742574	-0.686846	-0.582676	-0.439866	-0.294525	-0.184252	-0.139321	-0.166114	-0.234985	-0.311046	-0.371936	-0.425065	-0.474882	-0.526225	-0.563282	-0.569904	-0.539083	-0.480047	-0.413592	-0.362344	-0.352753	-0.390911	-0.458654	-0.539157
-1.96882	-1.94163	-1.92123	-1.91685	-1.92727	-1.95436	-1.98085	-1.99751	-1.99042	-1.95401	-1.9006	-1.84247	-1.79479	-1.76932	-1.76053	-1.75643	-1.74504	-1.71624	-1.68001	-1.65642	-1.67059	-1.72415	-1.79063	-1.82557	-1.79421	-1.68683	-1.5208	-1.34721	-1.21257	-1.13197	-1.10981	-1.13713	-1.18526	-1.23925	-1.29297	-1.34678	-1.40129	-1.46308	-1.53931	-1.62577	-1.70839	-1.75145	-1.74739	-1.69321	-1.63063	-1.60426	-1.64036	-1.72272	-1.81205	-1.87601
-0.784605	-0.997306	-1.2274	-1.43262	-1.58429	-1.66095	-1.67296	-1.64168	-1.60951	-1.59882	-1.61008	-1.63769	-1.67529	-1.71439	-1.74997	-1.77668	-1.75403	-1.64123	-1.41287	-1.1065	-0.791804	-0.571876	-0.503408	-0.538762	-0.551893	-0.454035	-0.245187	0.0143693	0.226692	0.323021	0.279535	0.108147	-0.14147	-0.421065	-0.690983	-0.92175	-1.11539	-1.2761	-1.42738	-1.57048	-1.6763	-1.70987	-1.66024	-1.54201	-1.40961	-1.31592	-1.29657	-1.33865	-1.41049	-1.48284
0.59517	0.585954	0.573142	0.550262	0.506581	0.438014	0.321272	0.136616	-0.124323	-0.448109	-0.799908	-1.13269	-1.39793	-1.56763	-1.65724	-1.70505	-1.74524	-1.79782	-1.86628	-1.93444	-1.99489	-2.04792	-2.08084	-2.08257	-2.0565	-2.00086	-1.93363	-1.87686	-1.85922	-1.89407	-1.97288	-2.07346	-2.18931	-2.30281	-2.40127	-2.4882	-2.56691	-2.64442	-2.73059	-2.80595	-2.86555	-2.89205	-2.88913	-2.85742	-2.80019	-2.70948	-2.59419	-2.47396	-2.37341	-2.31015
-1.34512	-1.45427	-1.58504	-1.73235	-1.87679	-2.01401	-2.13112	-2.20258	-2.2135	-2.17451	-2.09435	-2.02745	-2.00307	-2.0408	-2.12194	-2.21283	-2.2618	-2.25995	-2.21052	-2.12543	-2.01906	-1.89848	-1.77365	-1.65301	-1.58712	-1.61839	-1.75049	-1.96032	-2.19398	-2.40004	-2.53585	-2.60884	-2.65484	-2.71421	-2.81224	-2.94567	-3.08203	-3.19418	-3.27508	-3.34587	-3.42485	-3.51007	-3.57875	-3.5757	-3.44762	-3.18824	-2.86529	-2.54124	-2.28273	-2.11051
0.922305	0.995893	1.06454	1.10645	1.14857	1.18804	1.24964	1.2887	1.29121	1.239	1.17151	1.11053	1.08874	1.13295	1.25443	1.45633	1.72395	2.03399	2.30666	2.47403	2.53202	2.52538	2.49919	2.49987	2.52045	2.55827	2.58034	2.55844	2.48184	2.3743	2.27015	2.18857	2.11903	2.03997	1.93205	1.79596	1.66199	1.53546	1.43199	1.36215	1.30508	1.24739	1.16342	1.06347	0.984747	0.937582	0.922682	0.925776	0.930152	0.918772
-0.678202	-0.644839	-0.599584	-0.548898	-0.505247	-0.474729	-0.460182	-0.473672	-0.520248	-0.608374	-0.738922	-0.911191	-1.10798	-1.29098	-1.41777	-1.45566	-1.39272	-1.25725	-1.10528	-0.98993	-0.933546	-0.930873	-0.946597	-0.939334	-0.875032	-0.754653	-0.600738	-0.425382	-0.26693	-0.115196	0.0308615	0.176105	0.30514	0.413344	0.513891	0.605299	0.684066	0.732414	0.728514	0.651197	0.513428	0.333049	0.125506	-0.0934459	-0.30856	-0.503929	-0.661972	-0.759497	-0.793009	-0.782888
0.73994	0.689383	0.670665	0.702971	0.774044	0.848886	0.841191	0.723649	0.554745	0.410842	0.350893	0.360894	0.421833	0.513566	0.604957	0.709464	0.773233	0.811098	0.817388	0.840694	0.859204	0.866796	0.817189	0.694102	0.492208	0.22922	-0.0670637	-0.41692	-0.804645	-1.20847	-1.61688	-1.99556	-2.2449	-2.31364	-2.22579	-2.06215	-1.90686	-1.81562	-1.76401	-1.71198	-1.56553	-1.30016	-0.914587	-0.480024	-0.0745407	0.241719	0.428489	0.559678	0.660682	0.766509
0.107194	0.112409	0.121296	0.140232	0.168292	0.188149	0.185077	0.134142	0.0218452	-0.140205	-0.334556	-0.556139	-0.798634	-1.06791	-1.33887	-1.59137	-1.78507	-1.8867	-1.89077	-1.80756	-1.66736	-1.50047	-1.32105	-1.1324	-0.94287	-0.756869	-0.599446	-0.473424	-0.363089	-0.247844	-0.109017	0.0649522	0.265888	0.462938	0.609665	0.658415	0.594051	0.421628	0.192303	-0.0546124	-0.286399	-0.481439	-0.63343	-0.721354	-0.7467	-0.716772	-0.662478	-0.605876	-0.562263	-0.537182
0.484807	0.547314	0.64787	0.767407	0.889075	0.962279	0.946412	0.832442	0.653976	0.47968	0.355441	0.278682	0.233466	0.177331	0.0801257	-0.0529131	-0.21274	-0.374381	-0.50898	-0.575632	-0.549009	-0.427555	-0.23279	0.0124511	0.307724	0.663689	1.088	1.55713	2.01183	2.37729	2.58969	2.63443	2.52411	2.29351	1.98704	1.66705	1.38258	1.16009	0.987964	0.853054	0.757972	0.684879	0.647312	0.626098	0.600667	0.559892	0.502603	0.447508	0.413989	0.396527
-2.91602	-3.01166	-2.99946	-2.85178	-2.5927	-2.29353	-2.03097	-1.83417	-1.69473	-1.60146	-1.53665	-1.4857	-1.42328	-1.35104	-1.27881	-1.23054	-1.23836	-1.3229	-1.4747	-1.64243	-1.79055	-1.88756	-1.93733	-1.96402	-1.96963	-1.93756	-1.8302	-1.62657	-1.33544	-0.993252	-0.645319	-0.356454	-0.165343	-0.0969549	-0.14756	-0.284761	-0.481132	-0.688787	-0.877826	-1.03713	-1.17338	-1.28228	-1.37245	-1.44577	-1.51441	-1.5867	-1.65247	-1.69957	-1.7063	-1.66913
0.114315	-0.0254539	-0.250226	-0.534522	-0.820105	-1.02336	-1.08569	-1.0016	-0.813593	-0.572721	-0.293183	0.0274147	0.377259	0.721373	0.983303	1.08559	0.943411	0.545875	-0.0152151	-0.591927	-1.02964	-1.24347	-1.2539	-1.15798	-1.04401	-0.943242	-0.838856	-0.702045	-0.497712	-0.236593	0.0571574	0.345299	0.542918	0.610049	0.533311	0.323012	0.0317087	-0.28946	-0.605458	-0.898873	-1.14757	-1.34606	-1.48755	-1.6047	-1.70802	-1.81135	-1.90801	-1.98933	-2.05151	-2.09569
-0.619924	-0.646346	-0.675438	-0.70112	-0.730076	-0.756355	-0.794374	-0.849451	-0.916116	-0.972394	-0.988842	-0.960186	-0.89526	-0.808984	-0.713086	-0.607575	-0.500704	-0.388183	-0.273733	-0.1685	-0.0901511	-0.0222733	0.0414128	0.126151	0.270581	0.476809	0.720518	0.957104	1.14394	1.24218	1.26273	1.22108	1.14949	1.06205	0.956739	0.825726	0.690992	0.57358	0.478605	0.403587	0.341512	0.289381	0.2528	0.240812	0.26087	0.307314	0.364281	0.400453	0.395383	0.351297
0.45452	0.284566	0.107456	-0.0595134	-0.200057	-0.307648	-0.382717	-0.42698	-0.452344	-0.465783	-0.471165	-0.477353	-0.487875	-0.504252	-0.532027	-0.563205	-0.596795	-0.618972	-0.625802	-0.617957	-0.578877	-0.512865	-0.40077	-0.243285	-0.0512248	0.158257	0.349464	0.495145	0.562866	0.541173	0.454827	0.341229	0.243182	0.173052	0.122697	0.0759014	0.0262835	-0.0321744	-0.0977438	-0.164682	-0.235121	-0.297744	-0.349297	-0.3739	-0.369991	-0.343877	-0.307963	-0.284056	-0.283191	-0.305922
-0.376115	-0.398465	-0.439724	-0.499217	-0.556283	-0.594668	-0.626869	-0.644078	-0.656949	-0.683246	-0.710511	-0.72719	-0.715242	-0.665765	-0.588372	-0.501621	-0.423041	-0.36691	-0.35276	-0.375462	-0.429941	-0.508026	-0.58131	-0.627558	-0.625529	-0.588614	-0.542503	-0.505812	-0.511347	-0.52394	-0.458744	-0.268006	0.0321344	0.392036	0.677126	0.773966	0.6583	0.395558	0.0842187	-0.203505	-0.437168	-0.575961	-0.655078	-0.712103	-0.769937	-0.821815	-0.855871	-0.884648	-0.908715	-0.935442
-0.241324	-0.147836	-0.0527319	0.0412087	0.100747	0.111127	0.0833855	0.036928	-0.0148737	-0.065188	-0.102812	-0.103354	-0.0517359	0.0503613	0.18464	0.320301	0.417191	0.441205	0.383286	0.266896	0.130989	0.025446	-0.0383928	-0.0630019	-0.0744193	-0.106781	-0.162856	-0.202833	-0.168245	-0.00795601	0.259139	0.574786	0.856614	1.02459	1.05154	0.949501	0.747524	0.46841	0.155159	-0.124338	-0.339205	-0.497779	-0.620733	-0.731524	-0.826011	-0.888953	-0.901804	-0.867502	-0.799045	-0.73116
-1.27177	-1.22487	-1.16397	-1.07511	-0.963653	-0.836085	-0.711319	-0.60833	-0.538055	-0.492122	-0.471923	-0.488001	-0.530956	-0.584313	-0.626433	-0.647045	-0.654716	-0.666668	-0.707702	-0.808554	-0.976042	-1.21298	-1.47749	-1.72274	-1.8969	-1.96409	-1.92246	-1.79457	-1.60605	-1.37929	-1.14328	-0.930734	-0.787164	-0.731612	-0.749816	-0.80825	-0.880224	-0.963615	-1.04639	-1.12811	-1.19729	-1.24919	-1.28332	-1.31032	-1.33679	-1.36327	-1.38824	-1.40436	-1.41707	-1.42947
-0.683574	-0.849274	-0.997888	-1.09749	-1.14546	-1.16085	-1.16431	-1.16525	-1.17035	-1.17607	-1.17533	-1.16413	-1.1546	-1.15573	-1.18751	-1.23343	-1.27827	-1.29785	-1.29863	-1.27886	-1.2598	-1.26032	-1.29276	-1.36052	-1.44987	-1.5362	-1.55478	-1.47454	-1.28477	-1.04143	-0.827333	-0.71082	-0.712684	-0.785611	-0.879499	-0.962199	-1.01676	-1.06071	-1.09929	-1.1206	-1.13317	-1.13886	-1.13792	-1.15573	-1.19143	-1.23956	-1.28557	-1.31527	-1.33538	-1.35572
-1.48718	-1.58443	-1.70335	-1.83662	-1.97873	-2.09986	-2.18379	-2.19455	-2.08582	-1.84306	-1.4377	-0.937628	-0.434036	-0.0340867	0.201922	0.258309	0.181856	0.00788508	-0.210151	-0.491982	-0.83203	-1.23856	-1.62464	-1.86538	-1.85403	-1.5477	-1.03692	-0.481294	-0.0594616	0.159975	0.205334	0.143928	0.0727063	0.0675734	0.158873	0.310762	0.441314	0.431806	0.273547	-0.00698882	-0.343446	-0.74111	-1.16282	-1.58075	-1.90563	-2.11963	-2.22999	-2.25686	-2.27727	-2.27463
-1.51053	-1.47338	-1.4291	-1.38232	-1.30564	-1.18085	-1.00538	-0.802152	-0.61215	-0.454856	-0.325592	-0.20775	-0.100376	-0.0115952	0.0413722	0.0497317	-0.000727451	-0.118584	-0.273922	-0.430974	-0.530818	-0.546827	-0.48147	-0.369465	-0.261744	-0.243393	-0.341758	-0.53646	-0.756146	-0.939359	-1.05144	-1.06764	-1.00829	-0.898783	-0.759511	-0.636073	-0.589435	-0.668038	-0.84563	-1.05639	-1.24789	-1.39376	-1.50766	-1.59788	-1.69025	-1.79366	-1.89805	-1.98934	-2.01763	-1.94647
3.17542	3.13732	3.08574	3.02152	2.94812	2.85024	2.69863	2.46249	2.17531	1.90823	1.72455	1.64828	1.64317	1.64938	1.62018	1.53825	1.38902	1.16679	0.905714	0.653608	0.454255	0.31543	0.22509	0.168793	0.159462	0.17256	0.21952	0.312745	0.451621	0.623787	0.784873	0.900022	0.941094	0.905668	0.811344	0.694567	0.555674	0.412992	0.266356	0.11124	-0.0270783	-0.14468	-0.228625	-0.28571	-0.302114	-0.292673	-0.280201	-0.2812	-0.304819	-0.331255
0.747978	0.673839	0.558461	0.397386	0.186751	-0.0835413	-0.402845	-0.728726	-1.01514	-1.22869	-1.36724	-1.45012	-1.49776	-1.53678	-1.56546	-1.57976	-1.54642	-1.44424	-1.27501	-1.05091	-0.815312	-0.612162	-0.481542	-0.452946	-0.494075	-0.562482	-0.623992	-0.67302	-0.724562	-0.781759	-0.851409	-0.938323	-1.03373	-1.12646	-1.20191	-1.24491	-1.2728	-1.29496	-1.31737	-1.3513	-1.39883	-1.46158	-1.52261	-1.56252	-1.56843	-1.55254	-1.52256	-1.51001	-1.51694	-1.53148
1.42744	1.54507	1.54377	1.36197	0.95306	0.375085	-0.262043	-0.840597	-1.28669	-1.62035	-1.89715	-2.08277	-2.07745	-1.85461	-1.41191	-0.858119	-0.331693	0.0731836	0.352288	0.529944	0.622403	0.607647	0.458139	0.179637	-0.171051	-0.495554	-0.735397	-0.878016	-0.970205	-1.05167	-1.11963	-1.17063	-1.19297	-1.21033	-1.24074	-1.31885	-1.42433	-1.55501	-1.67142	-1.78024	-1.89096	-1.98918	-2.08472	-2.15571	-2.17591	-2.12613	-1.97539	-1.73099	-1.44054	-1.1831
0.750017	0.83023	0.907338	0.97283	1.01799	1.0474	1.07118	1.09534	1.12376	1.15546	1.16872	1.14806	1.06744	0.922624	0.719417	0.498551	0.30353	0.160426	0.0748059	0.0369471	0.0358532	0.0598732	0.105613	0.168316	0.267491	0.431603	0.668934	0.977163	1.29507	1.53935	1.65256	1.6338	1.5017	1.30738	1.09544	0.9113	0.775301	0.670345	0.580481	0.483904	0.371106	0.244987	0.131446	0.0415336	-0.013596	-0.0331886	-0.0247531	0.00380608	0.0288615	0.0479107
-1.40487	-1.38869	-1.36291	-1.33814	-1.2997	-1.23365	-1.12442	-0.956432	-0.736893	-0.489377	-0.236687	-0.00996305	0.166257	0.280969	0.32996	0.336027	0.313627	0.279138	0.246702	0.235776	0.242958	0.264417	0.280335	0.262392	0.2071	0.132661	0.057676	-0.00204884	-0.0443893	-0.0681386	-0.0483642	0.0181442	0.155763	0.354562	0.590808	0.824731	1.02099	1.12852	1.10918	0.970666	0.759263	0.541846	0.351244	0.213905	0.128035	0.0771168	0.0357987	-0.0215681	-0.0916819	-0.170668
-1.21088	-1.27104	-1.33972	-1.33731	-1.33509	-1.34818	-1.43493	-1.56655	-1.66506	-1.66362	-1.6113	-1.54051	-1.44743	-1.36453	-1.28735	-1.23246	-1.19761	-1.17034	-1.19129	-1.28507	-1.4625	-1.74349	-2.0365	-2.32967	-2.57461	-2.7765	-2.94829	-3.10981	-3.22381	-3.232	-3.12282	-2.87906	-2.58245	-2.22028	-1.86761	-1.53089	-1.33832	-1.24321	-1.23494	-1.28212	-1.32703	-1.45808	-1.63517	-1.80365	-1.86133	-1.80404	-1.59657	-1.29361	-0.950718	-0.670126
-0.956431	-0.891897	-0.789809	-0.694354	-0.607307	-0.576353	-0.640985	-0.724172	-0.790079	-0.806662	-0.771365	-0.729309	-0.70852	-0.723538	-0.736137	-0.745316	-0.750985	-0.77912	-0.779526	-0.766612	-0.730607	-0.653264	-0.54861	-0.450399	-0.427741	-0.499798	-0.700246	-0.953205	-1.24478	-1.53195	-1.75724	-1.96112	-2.12776	-2.23939	-2.33896	-2.41185	-2.41217	-2.35294	-2.25123	-2.14973	-2.12174	-2.21282	-2.40696	-2.62322	-2.75013	-2.73772	-2.57495	-2.29275	-1.94976	-1.68372
-0.00159876	0.101568	0.271244	0.501989	0.726245	0.863949	0.853042	0.724097	0.556225	0.451577	0.408187	0.353139	0.286374	0.14898	-0.0146501	-0.164602	-0.326678	-0.492488	-0.632233	-0.73987	-0.819271	-0.883753	-1.04208	-1.30641	-1.63884	-1.97385	-2.21827	-2.33868	-2.35834	-2.2899	-2.14789	-1.94795	-1.7904	-1.75677	-1.86201	-2.03599	-2.15932	-2.19567	-2.15762	-2.10579	-2.16644	-2.35404	-2.60307	-2.79441	-2.83991	-2.76421	-2.62049	-2.48011	-2.37068	-2.38409
0.915344	0.97865	1.05599	1.19424	1.30969	1.40157	1.41712	1.25607	0.996053	0.767662	0.693794	0.73905	0.831916	0.872493	0.841578	0.645272	0.318734	0.0290395	-0.17792	-0.251027	-0.298527	-0.393869	-0.579012	-0.912353	-1.29981	-1.65405	-1.88254	-1.95776	-1.93067	-1.86803	-1.76672	-1.59691	-1.45189	-1.39167	-1.43474	-1.58971	-1.75312	-1.86081	-1.8751	-1.83786	-1.76855	-1.74152	-1.69206	-1.68457	-1.70551	-1.76749	-1.84801	-1.97567	-2.11637	-2.25703
1.18796	1.12419	1.03995	0.956116	0.908902	0.911655	0.993472	1.10981	1.21417	1.29963	1.31715	1.26177	1.13594	0.955533	0.774693	0.625855	0.541397	0.519231	0.571177	0.663779	0.725821	0.747028	0.675389	0.564798	0.407674	0.260292	0.0641386	-0.191741	-0.482522	-0.742153	-0.88735	-0.944283	-0.901039	-0.807692	-0.695814	-0.618526	-0.577113	-0.545343	-0.546009	-0.550352	-0.547212	-0.525296	-0.460538	-0.368027	-0.268183	-0.240706	-0.330031	-0.466528	-0.594291	-0.703653
0.377926	0.484107	0.54743	0.633246	0.674028	0.707386	0.72558	0.686027	0.588835	0.470628	0.328512	0.214807	0.125362	0.0398808	-0.0905952	-0.213034	-0.283445	-0.27385	-0.221426	-0.209904	-0.284961	-0.421168	-0.536892	-0.496493	-0.325887	-0.106279	0.0315295	-0.013774	-0.233375	-0.590757	-1.00422	-1.50871	-2.0465	-2.52391	-2.80392	-2.86232	-2.75515	-2.5994	-2.48351	-2.45389	-2.47362	-2.50359	-2.44159	-2.32855	-2.19059	-2.08761	-2.03231	-2.0315	-2.06883	-2.12991
-0.297235	-0.183218	-0.0723277	0.0114033	0.0815162	0.152753	0.228876	0.288029	0.291425	0.263936	0.204208	0.153942	0.156556	0.238707	0.39489	0.564902	0.726969	0.852526	0.907616	0.893455	0.78693	0.638869	0.430063	0.175913	-0.112123	-0.36526	-0.622744	-0.845627	-1.02787	-1.14632	-1.22355	-1.3133	-1.41748	-1.50793	-1.54154	-1.51387	-1.42223	-1.26983	-1.14691	-1.04319	-0.977761	-0.955634	-0.948866	-1.00652	-1.05526	-1.11787	-1.19106	-1.27787	-1.39897	-1.50778
-1.00498	-0.855438	-0.769775	-0.743272	-0.781023	-0.850509	-0.915941	-0.970922	-0.976908	-0.913936	-0.833704	-0.725309	-0.568367	-0.397693	-0.201601	-0.0352905	-0.00879554	-0.135768	-0.349778	-0.493683	-0.463568	-0.255685	-0.0480888	0.0190928	-0.101818	-0.353446	-0.670126	-0.983166	-1.20573	-1.35733	-1.49323	-1.62667	-1.75207	-1.90154	-2.02272	-2.07429	-2.00727	-1.84924	-1.70525	-1.59983	-1.57852	-1.63856	-1.6863	-1.71423	-1.72061	-1.79051	-1.91272	-2.08522	-2.21816	-2.30787
-0.0179793	0.235242	0.527938	0.771464	0.920164	0.970712	0.928044	0.861102	0.858055	0.895861	0.932228	0.917331	0.82907	0.739458	0.63974	0.576873	0.556795	0.598284	0.612516	0.555303	0.392354	0.168805	-0.0140734	-0.131548	-0.202502	-0.235687	-0.319865	-0.462927	-0.6319	-0.778933	-0.91011	-1.04861	-1.23127	-1.42927	-1.61792	-1.73598	-1.74945	-1.67021	-1.5686	-1.57707	-1.63963	-1.74032	-1.80178	-1.78959	-1.6627	-1.46992	-1.24067	-1.03195	-0.861151	-0.793205
-0.152476	-0.035474	0.00951145	0.0494065	0.0305301	-0.0568569	-0.173732	-0.242984	-0.173468	-0.0108635	0.181585	0.318605	0.387485	0.359664	0.337964	0.290555	0.254101	0.241979	0.248521	0.26948	0.307478	0.362299	0.421049	0.413499	0.333143	0.215023	0.0438731	-0.144245	-0.300798	-0.42682	-0.509443	-0.619397	-0.817285	-1.07119	-1.35706	-1.57188	-1.67591	-1.63801	-1.52812	-1.39786	-1.30045	-1.26822	-1.25994	-1.27135	-1.33842	-1.43272	-1.56179	-1.67643	-1.7455	-1.75897
-0.132171	-0.16964	-0.186814	-0.165273	-0.0898091	0.0102922	0.139898	0.217574	0.225553	0.23298	0.252731	0.317613	0.402063	0.476035	0.526743	0.552196	0.489999	0.387905	0.330765	0.342703	0.407351	0.540243	0.76416	1.02039	1.17053	1.14024	0.949652	0.61963	0.225774	-0.152024	-0.439529	-0.614119	-0.687918	-0.697623	-0.689237	-0.722451	-0.743154	-0.729513	-0.698946	-0.677763	-0.601757	-0.47022	-0.238908	0.0565664	0.274548	0.445076	0.497511	0.542678	0.548838	0.481459
0.900843	0.846425	0.768014	0.749166	0.750308	0.735031	0.688973	0.592324	0.488889	0.359966	0.250598	0.15118	0.0545489	-0.0531271	-0.173679	-0.284409	-0.325658	-0.305309	-0.263335	-0.255365	-0.271669	-0.346171	-0.521289	-0.702971	-0.849849	-0.979632	-1.10579	-1.25104	-1.40937	-1.58012	-1.72069	-1.7817	-1.69609	-1.49781	-1.23075	-0.973746	-0.794365	-0.63448	-0.511726	-0.42312	-0.394863	-0.369345	-0.319939	-0.245346	-0.139281	-0.0759372	-0.079368	-0.172371	-0.321767	-0.515873
1.17793	1.16208	1.10829	0.993507	0.891686	0.860868	0.939861	1.10371	1.25087	1.33348	1.32161	1.24659	1.17296	1.08386	0.994263	0.890616	0.763747	0.626351	0.508113	0.402587	0.320404	0.261358	0.229181	0.203952	0.152965	0.139095	0.221725	0.407828	0.609689	0.740566	0.692372	0.490645	0.192214	-0.0327785	-0.191433	-0.229301	-0.185456	-0.0618972	0.112696	0.319947	0.572544	0.748003	0.823196	0.714245	0.519712	0.270146	0.0340149	-0.167378	-0.419171	-0.682891
0.0185622	-0.103282	-0.211431	-0.276025	-0.202621	-0.0271211	0.194431	0.302147	0.266936	0.0998214	-0.0739337	-0.206335	-0.297089	-0.287869	-0.215192	-0.0663984	0.0913613	0.247067	0.337218	0.326534	0.29817	0.331152	0.451381	0.611026	0.712856	0.698349	0.546101	0.312204	0.014652	-0.297732	-0.545634	-0.685795	-0.766446	-0.782661	-0.744521	-0.628194	-0.424484	-0.145397	0.178519	0.494707	0.73071	0.812128	0.722215	0.453847	0.0379776	-0.401037	-0.752857	-0.935318	-0.914744	-0.835674
-0.153059	-0.185068	-0.213689	-0.27493	-0.338972	-0.412012	-0.473622	-0.486345	-0.498495	-0.476168	-0.400567	-0.255999	-0.0980832	0.0430073	0.0714407	0.0291233	-0.0139219	-0.0463469	-0.007301	0.0611475	0.120944	0.1065	0.0554489	-0.0684537	-0.213361	-0.391273	-0.603953	-0.813323	-1.01615	-1.21348	-1.4181	-1.60528	-1.73544	-1.79497	-1.79884	-1.71707	-1.62635	-1.56668	-1.54004	-1.54483	-1.58135	-1.5992	-1.61023	-1.55758	-1.53305	-1.60226	-1.75889	-1.94881	-2.13262	-2.24864
-0.774646	-0.88981	-0.93684	-0.91667	-0.841973	-0.796915	-0.747011	-0.671438	-0.545834	-0.404309	-0.29779	-0.28438	-0.37286	-0.46035	-0.520639	-0.513645	-0.427105	-0.281177	-0.196785	-0.139292	-0.0772737	-0.070562	-0.122262	-0.269273	-0.461078	-0.638735	-0.792193	-0.914408	-1.11075	-1.4053	-1.7453	-2.13184	-2.51454	-2.91467	-3.27143	-3.4458	-3.38045	-3.07965	-2.68767	-2.33057	-2.14643	-2.15421	-2.26083	-2.40884	-2.53745	-2.56529	-2.50693	-2.3696	-2.26799	-2.30546
-0.438913	-0.560507	-0.730253	-0.971484	-1.28667	-1.5981	-1.90195	-2.15252	-2.31807	-2.33538	-2.14805	-1.7519	-1.29175	-0.980532	-0.8643	-0.91446	-1.00076	-1.04503	-1.03884	-1.06101	-1.2088	-1.49789	-1.80952	-2.11344	-2.35157	-2.55086	-2.72022	-2.85029	-2.96177	-3.06167	-3.09308	-3.08521	-2.98686	-2.88979	-2.85261	-2.84486	-2.88783	-2.95069	-3.00124	-3.00649	-2.99334	-2.95841	-2.96338	-3.03504	-3.13807	-3.24415	-3.33532	-3.39007	-3.35771	-3.29062
-0.627148	-0.579624	-0.517394	-0.484516	-0.443371	-0.370814	-0.203848	0.0839031	0.41318	0.609309	0.598309	0.384151	0.0604967	-0.267932	-0.520113	-0.651958	-0.699644	-0.689077	-0.670426	-0.690664	-0.807928	-0.97057	-1.06741	-1.03922	-0.895626	-0.704502	-0.589952	-0.622915	-0.811532	-1.08191	-1.34197	-1.54488	-1.65091	-1.64627	-1.52749	-1.30056	-1.08372	-0.891277	-0.806102	-0.817107	-0.884036	-0.941807	-0.947801	-1.0256	-1.20302	-1.39063	-1.54262	-1.5517	-1.42829	-1.28917
-0.116738	-0.0941061	-0.0520108	0.0579986	0.16103	0.245215	0.250952	0.194765	0.0120604	-0.206179	-0.313348	-0.202728	0.12731	0.473171	0.737029	0.942344	1.08679	1.26048	1.36797	1.40191	1.34548	1.28066	1.22149	1.11737	0.902055	0.604723	0.293339	0.0451095	-0.152142	-0.395216	-0.66649	-0.965059	-1.17098	-1.19777	-1.00288	-0.716044	-0.485562	-0.384584	-0.397436	-0.453797	-0.60388	-0.761204	-0.931463	-1.05283	-1.19475	-1.36635	-1.59464	-1.82692	-2.11427	-2.38323
0.181083	0.18401	0.0786604	-0.126838	-0.431874	-0.785093	-1.08038	-1.25087	-1.30425	-1.24861	-1.10423	-0.922741	-0.738981	-0.628903	-0.564045	-0.480824	-0.384337	-0.293613	-0.267481	-0.367134	-0.576817	-0.769179	-0.912893	-0.99841	-1.08478	-1.16226	-1.23779	-1.33085	-1.4525	-1.54639	-1.55673	-1.51837	-1.48684	-1.52453	-1.58438	-1.68239	-1.75001	-1.77291	-1.72568	-1.56137	-1.26062	-0.913413	-0.628669	-0.49316	-0.526572	-0.700418	-0.980561	-1.23924	-1.46963	-1.58844
0.0764482	0.117932	0.147932	0.128612	0.0964528	0.0869549	0.0613404	0.0348912	-0.0318737	-0.163668	-0.361204	-0.581121	-0.755361	-0.832268	-0.800727	-0.745835	-0.658925	-0.630141	-0.652465	-0.780712	-0.972588	-1.18294	-1.35003	-1.40941	-1.35365	-1.2119	-1.04967	-0.860609	-0.687102	-0.554661	-0.500689	-0.548532	-0.653471	-0.784242	-0.918771	-1.02628	-1.05204	-1.01723	-0.907331	-0.742841	-0.549327	-0.357777	-0.266504	-0.333906	-0.53739	-0.814169	-1.08684	-1.29519	-1.50981	-1.67833
-0.410367	-0.340693	-0.2865	-0.194638	-0.0902309	-0.0119689	0.00358995	-0.101549	-0.306179	-0.507891	-0.585901	-0.502645	-0.309746	-0.124725	0.00712717	0.0276968	-0.0599137	-0.209894	-0.366155	-0.48064	-0.550849	-0.567561	-0.529608	-0.508752	-0.517818	-0.53686	-0.533543	-0.493044	-0.420488	-0.327482	-0.316262	-0.35923	-0.426273	-0.518836	-0.626631	-0.707031	-0.717832	-0.587971	-0.341664	-0.0683261	0.0963256	0.0803305	-0.111498	-0.401386	-0.706634	-0.942463	-1.10431	-1.16789	-1.13838	-1.03701
1.02071	1.12107	1.1812	1.15196	1.11213	1.07413	1.07483	1.10192	1.15102	1.16641	1.11112	0.935186	0.639034	0.347559	0.025774	-0.216435	-0.338535	-0.401216	-0.471209	-0.565542	-0.68783	-0.819596	-0.881575	-0.90618	-0.881813	-0.83651	-0.756445	-0.677325	-0.695248	-0.761978	-0.963414	-1.26664	-1.60322	-1.89549	-2.03189	-2.00825	-1.89155	-1.76979	-1.68682	-1.69543	-1.70127	-1.6949	-1.61704	-1.55073	-1.44731	-1.25855	-0.985738	-0.741399	-0.530018	-0.344762
0.557954	0.441528	0.315669	0.176405	0.0464866	-0.0993145	-0.229185	-0.326516	-0.402794	-0.409789	-0.352083	-0.24009	-0.11747	-0.0296503	0.0478915	0.105269	0.135297	0.0884323	0.00700251	-0.100739	-0.148861	-0.0998401	0.00977411	0.134251	0.222721	0.230256	0.155183	-0.00994566	-0.316099	-0.65175	-0.958956	-1.22416	-1.4287	-1.52097	-1.52254	-1.46601	-1.44174	-1.44161	-1.47754	-1.49896	-1.5076	-1.47323	-1.47553	-1.61818	-1.87346	-2.19889	-2.40816	-2.42787	-2.2057	-1.83222
-0.592182	-0.55882	-0.527507	-0.558073	-0.627734	-0.732881	-0.828825	-0.832485	-0.77307	-0.674512	-0.565839	-0.491718	-0.431034	-0.317444	-0.0943391	0.208124	0.496097	0.701071	0.673095	0.42243	0.0375394	-0.313851	-0.57078	-0.665706	-0.691568	-0.690015	-0.705687	-0.763575	-0.820415	-0.848591	-0.823478	-0.786718	-0.78134	-0.930235	-1.18807	-1.49908	-1.69221	-1.70934	-1.62239	-1.5336	-1.56505	-1.70613	-1.86139	-1.86954	-1.71494	-1.41706	-1.15747	-1.03118	-1.11088	-1.32713
1.0075	0.975154	1.00473	1.05263	1.10802	1.12081	1.11098	1.10666	1.0768	1.03946	1.00492	0.942953	0.834858	0.69062	0.573939	0.517011	0.508931	0.583369	0.675561	0.715305	0.705539	0.642733	0.541308	0.406205	0.225576	-0.0458829	-0.319204	-0.511297	-0.575468	-0.497033	-0.3953	-0.302415	-0.289378	-0.413914	-0.630656	-0.869803	-1.05716	-1.14308	-1.1397	-1.11613	-1.13941	-1.20296	-1.32411	-1.39267	-1.46076	-1.51265	-1.58062	-1.66761	-1.74914	-1.81216
-0.705743	-0.559382	-0.432164	-0.32224	-0.250542	-0.222961	-0.226649	-0.282305	-0.403313	-0.615134	-0.867333	-1.10398	-1.21692	-1.19871	-1.123	-1.04265	-1.03826	-1.07645	-1.11849	-1.20299	-1.33661	-1.50767	-1.63312	-1.71892	-1.77251	-1.84884	-2.01206	-2.24325	-2.42687	-2.49501	-2.42048	-2.31844	-2.26821	-2.2216	-2.17663	-2.1335	-2.13085	-2.19111	-2.29636	-2.37019	-2.43785	-2.5016	-2.56702	-2.63937	-2.73993	-2.88073	-3.03703	-3.16451	-3.24309	-3.24121
-0.96864	-0.977375	-0.983321	-0.921993	-0.790668	-0.622597	-0.500172	-0.440103	-0.480121	-0.566555	-0.673367	-0.736297	-0.725307	-0.650001	-0.526293	-0.484096	-0.519399	-0.646324	-0.79709	-0.879378	-0.838274	-0.737581	-0.699174	-0.758638	-0.920606	-1.06704	-1.13281	-1.09764	-1.01821	-0.995646	-1.06134	-1.20765	-1.37399	-1.56994	-1.75879	-1.89206	-1.93629	-1.86207	-1.72289	-1.5416	-1.38252	-1.23238	-1.1254	-1.11123	-1.2082	-1.35284	-1.45096	-1.48857	-1.49258	-1.48313
-0.298572	-0.252363	-0.193752	-0.102472	0.0131852	0.142028	0.262226	0.35641	0.422991	0.389857	0.305216	0.177492	0.0984667	0.0787921	0.124835	0.235743	0.38721	0.513485	0.576736	0.571565	0.542784	0.5658	0.647411	0.717982	0.701451	0.539267	0.221393	-0.202318	-0.620421	-0.899695	-1.02654	-1.04976	-1.00847	-0.975432	-0.97626	-0.986428	-0.990269	-0.95814	-0.859059	-0.73413	-0.609237	-0.501584	-0.440245	-0.405834	-0.383905	-0.382749	-0.374204	-0.382161	-0.396383	-0.376846
-0.00290228	0.0720736	0.0838466	0.0702621	-0.109253	-0.380716	-0.680733	-0.925381	-0.999722	-0.944949	-0.893171	-0.882915	-0.909093	-1.00765	-1.15687	-1.3673	-1.54105	-1.70289	-1.78996	-1.79394	-1.70322	-1.62657	-1.64263	-1.66824	-1.70928	-1.73495	-1.83359	-1.96679	-2.13313	-2.2909	-2.52737	-2.78181	-3.06222	-3.28341	-3.40383	-3.37761	-3.25057	-3.07492	-2.95175	-2.91182	-2.92195	-2.96586	-3.03634	-3.15009	-3.21256	-3.26978	-3.28821	-3.27572	-3.24342	-3.22834
0.451877	0.388168	0.390756	0.449186	0.590891	0.750788	0.888736	0.878013	0.703755	0.407932	0.166113	0.0342899	-0.0167436	-0.0626305	-0.134646	-0.220178	-0.311732	-0.363815	-0.411551	-0.472698	-0.599388	-0.74663	-0.980539	-1.27152	-1.57975	-1.80746	-1.90247	-1.87122	-1.74505	-1.5596	-1.37357	-1.26645	-1.2598	-1.27968	-1.28487	-1.25087	-1.22864	-1.2572	-1.3721	-1.51291	-1.65067	-1.77234	-1.85333	-1.88632	-1.88105	-1.80048	-1.7188	-1.58685	-1.48436	-1.3477
-0.963445	-0.840954	-0.671558	-0.532612	-0.395841	-0.297163	-0.185699	-0.05194	0.0594012	0.104781	0.0465837	-0.0645826	-0.16584	-0.193862	-0.156976	-0.0548567	-0.00274032	-0.0378991	-0.152279	-0.281445	-0.419895	-0.601058	-0.782611	-1.01006	-1.2576	-1.5012	-1.73149	-1.93552	-2.05536	-2.07197	-2.05228	-2.01153	-2.03164	-2.04561	-2.06478	-2.03942	-1.96968	-1.8821	-1.8254	-1.83204	-1.94628	-2.13608	-2.33996	-2.46187	-2.45682	-2.28393	-2.04671	-1.8044	-1.59265	-1.36551
-1.35601	-1.27032	-1.12905	-0.932064	-0.698723	-0.502866	-0.391927	-0.325159	-0.275349	-0.265265	-0.260382	-0.272887	-0.30661	-0.398969	-0.545328	-0.764302	-1.00656	-1.23039	-1.40318	-1.50521	-1.55816	-1.60064	-1.62898	-1.63922	-1.64803	-1.57464	-1.48276	-1.36187	-1.30392	-1.40453	-1.6132	-1.87937	-2.06648	-2.18968	-2.21994	-2.19043	-2.07035	-1.94043	-1.808	-1.7327	-1.69648	-1.64078	-1.51535	-1.31674	-1.1319	-1.07352	-1.16881	-1.40758	-1.76317	-2.11785
0.405409	0.149678	-0.188422	-0.53087	-0.779016	-0.885824	-0.871527	-0.740583	-0.6015	-0.507458	-0.465109	-0.475515	-0.603568	-0.774016	-1.05719	-1.37893	-1.73153	-2.00228	-2.13256	-2.07963	-1.91515	-1.78145	-1.74504	-1.87809	-2.09167	-2.31287	-2.4471	-2.48489	-2.46692	-2.42825	-2.45092	-2.55441	-2.7739	-3.04182	-3.22529	-3.27322	-3.22831	-3.15221	-3.10889	-3.11746	-3.12242	-3.02975	-2.78743	-2.50404	-2.202	-1.94189	-1.81509	-1.83544	-1.9886	-2.21291
-0.344695	-0.418902	-0.519836	-0.611886	-0.645211	-0.710133	-0.816893	-1.00772	-1.25413	-1.53585	-1.7274	-1.81065	-1.83578	-1.84254	-1.86785	-1.92857	-1.98909	-2.06736	-2.12262	-2.17381	-2.20218	-2.22431	-2.26123	-2.33074	-2.39947	-2.41751	-2.36626	-2.30161	-2.3058	-2.45488	-2.69603	-2.93811	-3.0705	-3.09991	-3.05036	-3.05086	-3.15031	-3.29871	-3.44283	-3.51668	-3.56582	-3.63351	-3.72476	-3.81704	-3.86911	-3.82686	-3.68628	-3.46964	-3.22392	-3.05111
0.694261	0.609758	0.524134	0.440326	0.345815	0.204804	0.038914	-0.0963329	-0.140009	-0.0495984	0.160353	0.453874	0.660601	0.708928	0.606735	0.373914	0.12287	-0.113213	-0.284253	-0.414462	-0.491063	-0.505854	-0.470618	-0.465591	-0.507463	-0.624562	-0.752711	-0.810463	-0.798629	-0.764211	-0.782234	-0.861935	-0.950972	-0.947697	-0.829104	-0.668892	-0.518298	-0.415892	-0.399947	-0.398836	-0.446756	-0.495069	-0.576329	-0.666463	-0.76828	-0.907833	-1.01734	-1.03889	-0.952998	-0.842951
0.722047	0.654478	0.623811	0.613731	0.603935	0.584711	0.497418	0.350422	0.170043	0.0309411	-0.0206212	0.00796372	0.0477297	0.0341726	-0.07508	-0.228478	-0.382616	-0.510755	-0.594971	-0.577673	-0.533427	-0.483961	-0.423196	-0.421102	-0.43939	-0.495174	-0.557709	-0.580467	-0.582083	-0.580822	-0.60625	-0.636063	-0.699555	-0.812604	-0.955526	-1.11277	-1.20817	-1.20809	-1.08813	-0.871374	-0.656208	-0.481015	-0.413423	-0.445983	-0.536404	-0.595727	-0.654516	-0.728065	-0.784708	-0.831409
0.0286598	0.195632	0.357823	0.45906	0.496472	0.501279	0.455458	0.377657	0.23378	0.047847	-0.0606648	0.00978033	0.226759	0.457289	0.53659	0.442951	0.140544	-0.249355	-0.650573	-1.04901	-1.37713	-1.58449	-1.64383	-1.60728	-1.54707	-1.49328	-1.44559	-1.41133	-1.49117	-1.70499	-2.1106	-2.57167	-2.92286	-3.0494	-2.89336	-2.62527	-2.36031	-2.19552	-2.11209	-2.08844	-2.12265	-2.20403	-2.30935	-2.41447	-2.40294	-2.2496	-2.08467	-2.00655	-2.09202	-2.30511
-0.516046	-0.59241	-0.639358	-0.671967	-0.700313	-0.690605	-0.697303	-0.658132	-0.56454	-0.488417	-0.466775	-0.467644	-0.527291	-0.571631	-0.63453	-0.652642	-0.627494	-0.529661	-0.364434	-0.245157	-0.250265	-0.378835	-0.569031	-0.772949	-0.876563	-0.914109	-0.911239	-0.938919	-1.01889	-1.18808	-1.39429	-1.60573	-1.79479	-1.93931	-2.06474	-2.14141	-2.20151	-2.1386	-1.98399	-1.77844	-1.62869	-1.57428	-1.61768	-1.69623	-1.77332	-1.79255	-1.74404	-1.72595	-1.69477	-1.6537
-1.23391	-1.08247	-0.818246	-0.53728	-0.218972	0.0495544	0.203999	0.219772	0.0877505	-0.0254806	-0.111859	-0.170294	-0.315388	-0.530196	-0.763348	-0.995269	-1.19864	-1.40318	-1.54319	-1.65035	-1.72209	-1.72919	-1.71558	-1.67141	-1.64517	-1.6812	-1.79685	-2.04313	-2.29844	-2.42739	-2.40459	-2.31236	-2.30004	-2.44889	-2.82783	-3.349	-3.8663	-4.23422	-4.42732	-4.48222	-4.4412	-4.36415	-4.27288	-4.2048	-4.00906	-3.74111	-3.35646	-2.90682	-2.4546	-2.0791
-0.446969	-0.366368	-0.313382	-0.315908	-0.386059	-0.531227	-0.645677	-0.734369	-0.741367	-0.682566	-0.658972	-0.640896	-0.682045	-0.812352	-0.964835	-1.09554	-1.21435	-1.25962	-1.27955	-1.28577	-1.26065	-1.30154	-1.38124	-1.44014	-1.49044	-1.45576	-1.33695	-1.23807	-1.2327	-1.40731	-1.72251	-2.09896	-2.45282	-2.706	-2.85469	-2.91808	-2.93394	-2.88398	-2.74289	-2.49389	-2.21267	-1.87864	-1.6219	-1.50529	-1.48643	-1.54764	-1.55836	-1.51264	-1.47591	-1.57313
0.832153	0.867393	0.887691	0.803677	0.666857	0.504323	0.343903	0.237212	0.174584	0.0601361	-0.085377	-0.222155	-0.350569	-0.457177	-0.581984	-0.707667	-0.794423	-0.816815	-0.829893	-0.893236	-1.01443	-1.1591	-1.23146	-1.21809	-1.17379	-1.15545	-1.21078	-1.38092	-1.58576	-1.7815	-1.95211	-2.09929	-2.2173	-2.27295	-2.26348	-2.2339	-2.21044	-2.17188	-2.08245	-2.00688	-1.94302	-1.92405	-1.95392	-2.02477	-2.20036	-2.41574	-2.59298	-2.66344	-2.64578	-2.5058
0.718701	0.589946	0.458966	0.352618	0.351692	0.439669	0.567776	0.651947	0.688695	0.676684	0.652395	0.617589	0.548956	0.438156	0.334871	0.271378	0.325768	0.423902	0.463681	0.385754	0.205964	-0.00238352	-0.224973	-0.418879	-0.590887	-0.708354	-0.814203	-0.93305	-1.0757	-1.18552	-1.26649	-1.30282	-1.34991	-1.4221	-1.53018	-1.64065	-1.64758	-1.53599	-1.38671	-1.25668	-1.19788	-1.22311	-1.28331	-1.39689	-1.48186	-1.52054	-1.51847	-1.43155	-1.28453	-1.12443
0.410718	0.312615	0.178939	0.0584762	0.00565379	0.00102806	0.0603358	0.124484	0.140871	0.0994295	0.00270661	-0.127198	-0.277939	-0.407163	-0.491535	-0.567045	-0.660611	-0.758724	-0.806283	-0.811136	-0.792649	-0.789968	-0.796826	-0.824431	-0.839056	-0.889387	-1.01807	-1.19633	-1.39418	-1.51806	-1.60213	-1.64526	-1.71623	-1.78619	-1.8046	-1.74675	-1.62018	-1.4648	-1.29925	-1.1712	-1.05343	-0.92493	-0.806942	-0.716216	-0.660626	-0.656772	-0.668532	-0.73404	-0.857842	-1.01011
-0.999592	-0.843427	-0.662938	-0.499547	-0.432083	-0.492461	-0.59309	-0.731277	-0.880566	-1.0535	-1.06052	-0.892931	-0.597129	-0.372043	-0.302118	-0.3558	-0.514722	-0.60608	-0.615688	-0.590616	-0.577935	-0.620956	-0.685497	-0.803584	-0.962383	-1.12572	-1.29263	-1.45859	-1.61141	-1.78887	-1.96014	-2.12592	-2.30986	-2.4431	-2.5504	-2.48857	-2.30204	-2.17969	-2.10556	-2.04569	-1.93597	-1.73407	-1.45614	-1.24248	-1.1659	-1.30926	-1.56896	-1.79876	-1.88791	-1.75736
0.874454	0.978092	1.06907	1.09208	1.01891	0.86887	0.667617	0.423069	0.0854015	-0.33697	-0.794892	-1.12845	-1.308	-1.30439	-1.16179	-0.968627	-0.789215	-0.639916	-0.564131	-0.584695	-0.669558	-0.927908	-1.25971	-1.66449	-1.99018	-2.19953	-2.21541	-2.13435	-2.03432	-2.05573	-2.23192	-2.49497	-2.7864	-3.02117	-3.15982	-3.20004	-3.22705	-3.22877	-3.15773	-2.94024	-2.54209	-2.10346	-1.75966	-1.65838	-1.8318	-2.14898	-2.40976	-2.57678	-2.58367	-2.55865
-1.09828	-1.16763	-1.24684	-1.29986	-1.27933	-1.18417	-1.02308	-0.899272	-0.808193	-0.761774	-0.729566	-0.690548	-0.650548	-0.644342	-0.666277	-0.711765	-0.794086	-0.89607	-0.997733	-1.08793	-1.17409	-1.26253	-1.26353	-1.19718	-1.08283	-0.959203	-0.812181	-0.66945	-0.523129	-0.41505	-0.404157	-0.484974	-0.635727	-0.761742	-0.835649	-0.886297	-0.914477	-0.977344	-1.08585	-1.18621	-1.27252	-1.27256	-1.20289	-1.13618	-1.05224	-0.986646	-0.978325	-0.997011	-1.03338	-1.07555
-0.775571	-0.427391	-0.154273	0.073734	0.175749	0.145044	0.0502852	-0.092269	-0.237667	-0.411272	-0.506479	-0.54857	-0.556623	-0.574696	-0.65135	-0.72792	-0.767813	-0.78227	-0.743066	-0.66929	-0.641516	-0.674453	-0.78885	-0.937961	-1.08427	-1.21737	-1.30622	-1.35131	-1.40176	-1.54884	-1.77717	-2.0616	-2.35488	-2.61375	-2.77861	-2.81604	-2.78316	-2.6558	-2.46083	-2.23202	-2.08085	-1.97816	-1.98392	-2.09827	-2.26719	-2.43667	-2.50489	-2.46021	-2.2976	-2.08245
-0.485852	-0.596244	-0.738945	-0.948653	-1.17013	-1.40578	-1.57805	-1.6883	-1.75578	-1.8166	-1.81724	-1.78837	-1.71677	-1.61224	-1.50895	-1.43802	-1.40412	-1.41032	-1.41846	-1.52664	-1.67674	-1.87212	-2.1068	-2.27039	-2.38793	-2.58595	-2.83359	-3.09086	-3.24547	-3.25408	-3.1659	-3.09315	-3.13367	-3.25415	-3.36032	-3.30941	-3.12933	-2.93233	-2.84822	-2.94803	-3.16312	-3.37485	-3.46174	-3.37907	-3.14739	-2.97178	-2.99594	-3.16987	-3.50407	-3.82966
-1.1146	-0.943495	-0.830277	-0.764351	-0.768815	-0.839345	-0.91255	-0.98818	-1.01009	-0.968513	-0.90791	-0.872892	-0.883694	-0.953843	-1.04855	-1.13224	-1.14791	-1.14949	-1.25758	-1.45086	-1.75633	-2.03895	-2.2832	-2.4036	-2.30445	-2.13268	-1.93944	-1.80669	-1.75157	-1.83869	-1.99131	-2.18601	-2.35865	-2.51526	-2.6073	-2.6155	-2.55396	-2.39791	-2.24655	-2.13559	-2.10404	-2.14597	-2.21498	-2.25675	-2.28935	-2.3315	-2.40757	-2.48223	-2.51984	-2.50703
-1.61423	-1.52187	-1.33196	-1.05855	-0.802189	-0.658468	-0.653988	-0.725718	-0.835635	-0.911152	-0.968591	-0.984645	-0.943955	-0.866353	-0.681376	-0.456619	-0.284129	-0.154232	-0.102474	-0.114064	-0.109106	-0.0827367	-0.0988428	-0.230196	-0.495271	-0.806712	-1.06509	-1.21109	-1.24829	-1.23608	-1.3937	-1.69757	-2.12785	-2.51905	-2.74447	-2.83645	-2.79931	-2.71348	-2.56466	-2.38651	-2.17213	-1.93798	-1.67595	-1.54454	-1.53527	-1.58397	-1.69269	-1.89588	-2.19029	-2.6083
-1.5915	-1.46412	-1.33501	-1.22251	-1.17686	-1.19847	-1.22543	-1.19833	-1.04957	-0.864089	-0.675141	-0.516766	-0.455507	-0.494215	-0.571835	-0.655348	-0.722531	-0.746204	-0.752863	-0.742397	-0.716211	-0.743842	-0.82381	-0.974298	-1.12708	-1.28179	-1.39212	-1.48363	-1.55745	-1.59058	-1.57931	-1.49038	-1.39348	-1.36232	-1.44865	-1.61322	-1.74779	-1.77774	-1.72236	-1.67269	-1.63693	-1.67106	-1.70294	-1.71673	-1.71304	-1.73609	-1.81707	-1.93147	-2.04987	-2.1339
0.459451	0.511758	0.479855	0.347585	0.0696658	-0.306594	-0.649754	-0.916574	-0.978213	-0.87832	-0.694061	-0.562783	-0.51095	-0.556552	-0.623697	-0.541323	-0.288217	0.0660217	0.388775	0.605373	0.707746	0.707373	0.656067	0.589227	0.563916	0.570432	0.60653	0.656809	0.677526	0.682463	0.708962	0.77533	0.867096	0.832001	0.576666	0.115985	-0.394015	-0.823518	-1.09704	-1.26318	-1.39989	-1.54083	-1.7457	-1.91869	-2.03505	-2.12311	-2.2122	-2.27152	-2.26799	-2.14635
-0.0222365	-0.163028	-0.326177	-0.554851	-0.784859	-1.0405	-1.288	-1.51344	-1.6524	-1.70872	-1.61243	-1.42125	-1.19343	-0.993658	-0.839184	-0.719182	-0.731672	-0.851171	-1.04544	-1.22412	-1.34717	-1.34214	-1.23125	-1.09704	-1.10388	-1.35741	-1.74427	-2.16666	-2.45143	-2.52357	-2.48563	-2.40263	-2.37291	-2.42136	-2.57026	-2.74102	-2.86543	-2.82562	-2.67589	-2.42251	-2.26836	-2.39819	-2.7092	-3.07225	-3.29434	-3.40728	-3.39089	-3.34189	-3.28115	-3.12601
1.86575	1.64043	1.38108	1.12089	0.954839	0.845711	0.718966	0.517534	0.232014	-0.110976	-0.370882	-0.506757	-0.591075	-0.716375	-0.90183	-1.15066	-1.39776	-1.52846	-1.50817	-1.36018	-1.20849	-1.08417	-0.993052	-0.921386	-0.896575	-0.890423	-0.969044	-1.13323	-1.33728	-1.54182	-1.70777	-1.88639	-2.09184	-2.28183	-2.43245	-2.55353	-2.61654	-2.68952	-2.73275	-2.75873	-2.76122	-2.72063	-2.60532	-2.49839	-2.4256	-2.38156	-2.36024	-2.37829	-2.39602	-2.42429
-0.370171	-0.330857	-0.346905	-0.352319	-0.303631	-0.220223	-0.128264	-0.0622259	-0.0498725	-0.110919	-0.209384	-0.303744	-0.319594	-0.340412	-0.424442	-0.567931	-0.748398	-0.903176	-0.990682	-1.00425	-0.981427	-0.95131	-0.931341	-0.949079	-1.01641	-1.15892	-1.30389	-1.45369	-1.54455	-1.58426	-1.58833	-1.61673	-1.68239	-1.79076	-1.94465	-2.11782	-2.23807	-2.26242	-2.1989	-2.08172	-1.95144	-1.81163	-1.67349	-1.58209	-1.57779	-1.66126	-1.81763	-1.98034	-2.07339	-2.04114
-0.59797	-0.757984	-0.930632	-1.13676	-1.33495	-1.56012	-1.83871	-2.15334	-2.48227	-2.79176	-3.00314	-3.10992	-3.10968	-3.06018	-2.96436	-2.82462	-2.6822	-2.6006	-2.60482	-2.72905	-2.95542	-3.16252	-3.26714	-3.23263	-3.12731	-2.99737	-2.93409	-2.93231	-3.00063	-3.14976	-3.34103	-3.56515	-3.69601	-3.66926	-3.47789	-3.19897	-2.92792	-2.77982	-2.61943	-2.46384	-2.27855	-2.12175	-2.14298	-2.33359	-2.59031	-2.88495	-3.14272	-3.33073	-3.45113	-3.44857
-0.786306	-0.632972	-0.490948	-0.362178	-0.258339	-0.177233	-0.100653	-0.00115276	0.123414	0.261232	0.32991	0.296614	0.142128	-0.102117	-0.362218	-0.562403	-0.599833	-0.488673	-0.302128	-0.079427	0.105956	0.176629	0.140454	0.0431674	-0.0596364	-0.132929	-0.167778	-0.16965	-0.235008	-0.386662	-0.62242	-0.832935	-0.927893	-0.801975	-0.490254	-0.100845	0.181101	0.342679	0.432529	0.418968	0.366847	0.309342	0.240704	0.191526	0.144386	0.121052	0.120377	0.157624	0.233962	0.306563
0.55576	0.512303	0.4254	0.303155	0.121451	-0.0368997	-0.14232	-0.255488	-0.349447	-0.377229	-0.408088	-0.472875	-0.594779	-0.756104	-0.934439	-1.04799	-1.06014	-1.02623	-0.98642	-1.00694	-1.07778	-1.28687	-1.55671	-1.87748	-2.13311	-2.3257	-2.34371	-2.24289	-2.08536	-2.00107	-2.05377	-2.19403	-2.27132	-2.26323	-2.18928	-2.12776	-2.155	-2.26135	-2.3502	-2.29341	-2.03767	-1.7241	-1.41465	-1.1269	-0.885395	-0.742531	-0.732274	-0.933623	-1.27183	-1.5505
-0.487845	-0.591343	-0.731289	-0.831391	-0.894229	-0.925284	-0.928701	-0.95444	-0.966649	-0.962391	-0.919536	-0.786661	-0.581689	-0.403706	-0.261373	-0.282694	-0.387884	-0.602725	-0.864397	-1.1327	-1.34921	-1.52207	-1.61942	-1.60791	-1.55556	-1.47274	-1.40787	-1.34145	-1.28694	-1.21039	-1.121	-1.05209	-1.04511	-1.13242	-1.26129	-1.40481	-1.5147	-1.54915	-1.53195	-1.41811	-1.24643	-1.09262	-0.987863	-0.982283	-1.06153	-1.21	-1.41566	-1.66053	-1.86794	-2.0187
-0.223298	-0.282336	-0.331261	-0.383381	-0.387144	-0.308937	-0.10019	0.114366	0.303846	0.370513	0.30093	0.111922	-0.0530275	-0.157844	-0.1693	-0.127096	-0.0860133	-0.138726	-0.26395	-0.39152	-0.479776	-0.46362	-0.431223	-0.46954	-0.614545	-0.821315	-1.03676	-1.17451	-1.32254	-1.46434	-1.59877	-1.68237	-1.69705	-1.61661	-1.54624	-1.51937	-1.56118	-1.61461	-1.58018	-1.45348	-1.27338	-1.12431	-1.06631	-1.07998	-1.17708	-1.3545	-1.6138	-1.89392	-2.16108	-2.2824
0.581112	0.517677	0.495745	0.540268	0.643575	0.802611	0.917554	0.938074	0.83042	0.66207	0.468711	0.325897	0.14893	-0.0522739	-0.236156	-0.407878	-0.531593	-0.66256	-0.752751	-0.805619	-0.845375	-0.901707	-1.00169	-1.13584	-1.31316	-1.43022	-1.48082	-1.47298	-1.38748	-1.24864	-1.15232	-1.06837	-0.969017	-0.795238	-0.590632	-0.382724	-0.212066	-0.0911569	0.0425784	0.304532	0.59571	0.762	0.810069	0.64676	0.381753	0.112162	-0.189787	-0.504671	-0.810208	-1.04664
-1.31948	-1.35286	-1.29712	-1.16622	-0.990531	-0.809312	-0.667309	-0.594916	-0.55631	-0.550862	-0.508211	-0.496105	-0.528733	-0.602509	-0.755124	-0.918744	-0.998108	-0.979297	-0.867475	-0.6769	-0.556982	-0.505156	-0.553338	-0.700184	-0.915611	-1.11697	-1.22416	-1.24082	-1.24555	-1.28798	-1.36996	-1.50006	-1.61656	-1.62573	-1.51982	-1.32558	-1.11639	-0.96575	-0.916522	-0.941071	-0.994933	-1.03481	-1.0621	-1.10174	-1.12563	-1.12661	-1.07518	-0.980192	-0.836374	-0.659642
0.446405	0.249386	-0.0228172	-0.329663	-0.669783	-1.02842	-1.35892	-1.58369	-1.62667	-1.55904	-1.42323	-1.26581	-1.14131	-1.19442	-1.29868	-1.45451	-1.63019	-1.76898	-1.8896	-1.94785	-2.00469	-2.0244	-1.96176	-1.79647	-1.58891	-1.42777	-1.30474	-1.3347	-1.44983	-1.58539	-1.68406	-1.69487	-1.63615	-1.53438	-1.40278	-1.39734	-1.47497	-1.62006	-1.81329	-1.96222	-2.06887	-2.14101	-2.11083	-2.10243	-2.08386	-2.04072	-1.95156	-1.77139	-1.57928	-1.4165
0.468079	0.356248	0.186079	-0.0580092	-0.286855	-0.446535	-0.503028	-0.497517	-0.487454	-0.498339	-0.50362	-0.447419	-0.334304	-0.187678	-0.147834	-0.201215	-0.365716	-0.593531	-0.796905	-0.994647	-1.18139	-1.30652	-1.31684	-1.20971	-1.07143	-1.03326	-1.13033	-1.34075	-1.55372	-1.77049	-1.94211	-2.15227	-2.34405	-2.50486	-2.57857	-2.59832	-2.56713	-2.52094	-2.49996	-2.4531	-2.37117	-2.26461	-2.13669	-2.01384	-2.05284	-2.16197	-2.29007	-2.38903	-2.42893	-2.40264
0.543806	0.567953	0.618178	0.707686	0.831994	0.981866	1.16022	1.35532	1.47554	1.51803	1.475	1.39113	1.27251	1.23628	1.17716	1.17788	1.22156	1.30836	1.50345	1.68905	1.78282	1.74975	1.58648	1.31409	1.05465	0.796495	0.594153	0.409357	0.261572	0.168648	0.113526	0.109452	0.152691	0.308698	0.59442	0.932599	1.22556	1.4131	1.4644	1.32779	1.14635	0.981733	0.841751	0.772721	0.703388	0.621666	0.483703	0.320745	0.186595	0.174097
-0.214311	-0.182707	-0.169861	-0.161476	-0.16818	-0.261637	-0.437736	-0.597384	-0.688446	-0.649312	-0.574069	-0.504438	-0.542688	-0.670492	-0.85334	-1.02817	-1.11568	-1.07211	-0.905224	-0.758079	-0.679351	-0.698276	-0.781275	-0.893161	-1.00833	-1.06538	-1.02241	-0.854676	-0.617323	-0.376977	-0.21117	-0.197898	-0.331027	-0.541995	-0.710671	-0.737398	-0.679329	-0.667729	-0.805273	-1.0527	-1.3355	-1.48	-1.47215	-1.35781	-1.21402	-1.15639	-1.15181	-1.20227	-1.30374	-1.40032
0.00119372	0.187156	0.369999	0.504911	0.532845	0.423403	0.208737	-0.0575435	-0.335201	-0.594699	-0.803235	-0.962314	-1.15411	-1.36225	-1.56712	-1.69898	-1.76461	-1.71547	-1.64626	-1.54475	-1.4813	-1.52908	-1.64777	-1.82578	-2.05592	-2.32531	-2.5889	-2.82901	-2.96136	-2.99112	-2.91817	-2.73415	-2.50692	-2.30671	-2.17873	-2.07194	-2.03107	-2.04186	-2.09386	-2.21157	-2.3323	-2.46134	-2.50982	-2.48703	-2.42847	-2.38144	-2.29586	-2.22189	-2.14846	-2.10755
-0.0963786	-0.0843382	-0.146703	-0.289571	-0.492491	-0.684397	-0.774841	-0.753503	-0.643962	-0.550878	-0.48332	-0.448955	-0.397911	-0.314139	-0.297136	-0.362591	-0.511451	-0.68677	-0.801529	-0.808825	-0.677105	-0.507101	-0.375735	-0.355959	-0.439279	-0.562987	-0.628571	-0.668351	-0.669754	-0.723682	-0.860493	-1.10699	-1.38017	-1.65408	-1.81415	-1.88499	-1.92613	-1.93548	-1.9332	-1.84932	-1.6184	-1.26949	-0.914524	-0.700709	-0.693869	-0.905215	-1.20882	-1.50901	-1.747	-1.92778
-0.76099	-0.564147	-0.329389	-0.0580539	0.209463	0.454908	0.638914	0.741653	0.691498	0.455389	0.0843411	-0.344462	-0.711661	-0.937637	-0.973766	-0.841827	-0.597039	-0.360698	-0.216643	-0.194539	-0.282128	-0.39028	-0.45348	-0.465187	-0.408374	-0.316976	-0.21463	-0.0974545	-0.0350298	-0.105556	-0.253993	-0.49416	-0.737459	-1.00093	-1.21476	-1.34053	-1.4001	-1.33943	-1.24179	-1.14451	-1.07037	-1.03319	-1.03432	-1.111	-1.23774	-1.36215	-1.41162	-1.41918	-1.40058	-1.39566
1.75254	1.50775	1.31064	1.14542	1.04399	1.01398	1.06693	1.23393	1.55194	1.90617	2.21019	2.38364	2.36991	2.23079	2.1014	2.07222	2.14953	2.2866	2.33435	2.1986	1.9008	1.61056	1.46762	1.5304	1.61098	1.58016	1.31094	0.822587	0.245735	-0.232715	-0.535601	-0.641944	-0.645704	-0.596939	-0.535829	-0.493741	-0.495852	-0.541326	-0.612847	-0.647054	-0.580351	-0.422366	-0.253651	-0.158417	-0.150474	-0.256106	-0.358561	-0.510907	-0.624006	-0.712502
1.64343	1.58473	1.5827	1.63774	1.64776	1.57041	1.36451	1.12933	0.90821	0.804333	0.825961	0.965586	1.11074	1.17525	1.1856	1.09931	0.977187	0.868652	0.780993	0.775127	0.850827	0.927317	0.934581	0.859098	0.73646	0.648076	0.560315	0.485117	0.393892	0.230716	0.0419026	-0.129108	-0.330644	-0.529572	-0.76958	-0.975268	-1.09418	-1.10233	-1.03778	-0.94335	-0.839345	-0.782639	-0.788703	-0.8645	-0.925479	-0.991554	-1.05117	-1.11375	-1.1639	-1.25082
1.54081	1.46925	1.43455	1.41111	1.42437	1.38866	1.24809	1.01741	0.734271	0.463258	0.203305	0.00247439	-0.142043	-0.236281	-0.302305	-0.334609	-0.337921	-0.379815	-0.403187	-0.438258	-0.425749	-0.381815	-0.284789	-0.12374	0.0527081	0.142209	0.150945	0.058097	-0.101006	-0.242857	-0.323261	-0.321992	-0.322882	-0.378107	-0.450274	-0.560334	-0.612159	-0.628787	-0.649574	-0.788715	-0.97083	-1.15923	-1.21654	-1.13613	-0.97534	-0.763653	-0.619776	-0.604976	-0.637638	-0.668249
-2.09115	-1.8213	-1.4497	-1.05495	-0.727251	-0.530136	-0.497234	-0.560939	-0.698431	-0.785287	-0.815522	-0.80743	-0.833797	-0.865305	-0.882243	-0.859649	-0.824778	-0.829443	-0.828266	-0.800216	-0.724548	-0.644413	-0.558238	-0.486644	-0.439452	-0.373782	-0.306551	-0.261517	-0.183344	-0.0976933	0.0228772	0.1311	0.167083	0.166418	0.172896	0.170117	0.145754	0.121616	0.0969975	0.134321	0.217302	0.314542	0.415804	0.451976	0.365626	0.175251	0.00983465	-0.0775757	-0.0487482	0.0655458
-0.798088	-0.728963	-0.684666	-0.705777	-0.754598	-0.787622	-0.737543	-0.59666	-0.477749	-0.463715	-0.623788	-0.907153	-1.18521	-1.45398	-1.64837	-1.79989	-1.90565	-1.94229	-1.89802	-1.77451	-1.63289	-1.51963	-1.47784	-1.43916	-1.41233	-1.39981	-1.47649	-1.59746	-1.77116	-1.97475	-2.16236	-2.30143	-2.34495	-2.33266	-2.19455	-2.03134	-1.89754	-1.76907	-1.63575	-1.54251	-1.54659	-1.69103	-1.8835	-2.04966	-2.11726	-1.97136	-1.66071	-1.3076	-1.02631	-0.837527
-1.48273	-1.51619	-1.53619	-1.50637	-1.36846	-1.13124	-0.899833	-0.758391	-0.754848	-0.828989	-0.923902	-0.922871	-0.904996	-0.85733	-0.814799	-0.770834	-0.679588	-0.544326	-0.409099	-0.29802	-0.251225	-0.274888	-0.389884	-0.560657	-0.640667	-0.590161	-0.533059	-0.476927	-0.475873	-0.463252	-0.415371	-0.248342	-0.0134154	0.192731	0.33972	0.362384	0.309687	0.200822	0.0520152	-0.0893496	-0.183175	-0.187022	-0.105896	0.018889	0.14675	0.216686	0.222232	0.160284	0.0825742	-0.043103
-0.695303	-0.717384	-0.713022	-0.717131	-0.67427	-0.565489	-0.425311	-0.2226	0.034609	0.312765	0.534056	0.660141	0.636498	0.488986	0.286942	0.114735	0.0434745	0.118075	0.247607	0.278998	0.11223	-0.249321	-0.629488	-0.948854	-1.09772	-1.19233	-1.23216	-1.25813	-1.27709	-1.24691	-1.2276	-1.25597	-1.29166	-1.33185	-1.34977	-1.34891	-1.34311	-1.28959	-1.21016	-1.17871	-1.18903	-1.23351	-1.34987	-1.45296	-1.48096	-1.41195	-1.31442	-1.24714	-1.22955	-1.21519
0.708085	0.668965	0.582917	0.47905	0.305735	0.13393	-0.0217252	-0.173778	-0.339057	-0.47932	-0.589867	-0.596664	-0.527456	-0.49754	-0.571315	-0.762414	-1.01782	-1.22051	-1.32465	-1.342	-1.27582	-1.25847	-1.28301	-1.33228	-1.37694	-1.43326	-1.47827	-1.59035	-1.77299	-1.99095	-2.23706	-2.42439	-2.55895	-2.6251	-2.70803	-2.73465	-2.77327	-2.70906	-2.58886	-2.43841	-2.29956	-2.18406	-2.13412	-2.20872	-2.37272	-2.61929	-2.77163	-2.80376	-2.69446	-2.54157
0.541291	0.397751	0.273519	0.150878	0.150249	0.200088	0.34175	0.465947	0.526571	0.522244	0.500691	0.4387	0.369931	0.272502	0.162544	0.0190297	-0.15708	-0.333452	-0.517014	-0.689888	-0.915701	-1.13523	-1.39174	-1.68328	-1.89906	-2.04984	-2.05392	-2.01255	-1.98509	-1.98333	-2.00566	-2.02992	-2.00392	-1.88957	-1.74547	-1.59784	-1.50532	-1.52925	-1.61794	-1.73983	-1.9169	-2.11998	-2.34758	-2.53247	-2.61478	-2.62899	-2.57175	-2.50018	-2.43952	-2.40333
-0.525631	-0.756509	-0.890323	-0.959599	-0.890922	-0.734411	-0.532618	-0.373711	-0.330635	-0.413814	-0.520113	-0.674277	-0.779688	-0.835129	-0.809027	-0.764791	-0.736574	-0.71237	-0.76536	-0.972004	-1.2906	-1.65181	-1.97986	-2.18113	-2.28951	-2.30357	-2.24988	-2.152	-2.00386	-1.95414	-2.03957	-2.21033	-2.33139	-2.32467	-2.21528	-2.12679	-2.09718	-2.08332	-2.07186	-2.05142	-2.02665	-1.98066	-1.956	-1.99343	-2.06126	-2.16666	-2.21575	-2.24096	-2.24455	-2.24639
-0.156909	0.121853	0.398118	0.603001	0.661384	0.568775	0.42461	0.266397	0.137596	0.00473361	-0.111038	-0.129271	-0.0542071	0.099715	0.202087	0.160441	-0.0251443	-0.30617	-0.579689	-0.788031	-0.924414	-0.983093	-1.01868	-1.0981	-1.23992	-1.49939	-1.83929	-2.1829	-2.38556	-2.4223	-2.38712	-2.35529	-2.34327	-2.3797	-2.33091	-2.1193	-1.77467	-1.31383	-0.959963	-0.780405	-0.731402	-0.828997	-0.962125	-1.10777	-1.25156	-1.35161	-1.39131	-1.41467	-1.43701	-1.5206
1.40402	1.15123	0.909027	0.68408	0.510683	0.397483	0.334229	0.293475	0.268338	0.284363	0.314111	0.370572	0.479781	0.609316	0.737732	0.786029	0.714879	0.552188	0.362488	0.162482	0.0335458	-0.0658838	-0.132817	-0.15853	-0.127849	-0.108337	-0.108006	-0.231054	-0.528096	-0.888004	-1.19781	-1.29808	-1.14642	-0.885044	-0.639746	-0.43739	-0.280231	-0.108066	0.103863	0.214758	0.178578	-0.0276332	-0.357446	-0.676091	-0.89588	-0.96193	-0.964947	-0.955122	-0.95412	-0.946625
-1.21483	-1.1166	-1.03922	-1.02614	-1.14379	-1.36274	-1.57814	-1.77848	-1.91974	-2.05203	-2.19174	-2.29171	-2.40573	-2.4684	-2.44593	-2.36484	-2.24406	-2.11925	-2.01799	-1.939	-1.88479	-1.89317	-1.93176	-2.08882	-2.30116	-2.53942	-2.76675	-2.91634	-2.99721	-3.00085	-2.90938	-2.74638	-2.58295	-2.41788	-2.30247	-2.27113	-2.33231	-2.44439	-2.57907	-2.71316	-2.84966	-2.97636	-3.11112	-3.22082	-3.28722	-3.28681	-3.17838	-2.96215	-2.72344	-2.57446
0.584094	0.201402	-0.204878	-0.587873	-0.841465	-0.897638	-0.800832	-0.556386	-0.223436	0.116993	0.307205	0.326686	0.253792	0.195457	0.176553	0.207883	0.166562	0.023917	-0.156025	-0.36482	-0.571839	-0.674996	-0.712699	-0.624833	-0.424887	-0.116832	0.236278	0.578342	0.742891	0.746245	0.611467	0.34835	-0.00184962	-0.389434	-0.719374	-0.933198	-1.02277	-1.0207	-0.945567	-0.897183	-0.920859	-1.05552	-1.23811	-1.45469	-1.63708	-1.73639	-1.76018	-1.71208	-1.68395	-1.65227
0.417412	0.425187	0.408977	0.383778	0.313846	0.201351	0.117803	0.0737123	0.0723227	0.128299	0.170445	0.230928	0.300932	0.379319	0.426054	0.471878	0.476773	0.486429	0.481236	0.502024	0.513674	0.469641	0.320676	0.0535119	-0.302877	-0.695435	-0.992895	-1.16054	-1.2158	-1.23885	-1.32285	-1.46939	-1.58534	-1.56161	-1.45415	-1.41419	-1.49649	-1.71309	-1.93911	-1.99374	-1.82884	-1.53131	-1.21743	-0.978774	-0.834464	-0.736129	-0.68543	-0.626603	-0.570806	-0.526268
-0.0885848	-0.0835075	-0.108517	-0.162502	-0.25128	-0.323971	-0.38361	-0.393428	-0.367594	-0.315442	-0.247861	-0.134043	-0.0455676	-0.0478881	-0.110393	-0.196689	-0.258657	-0.268814	-0.202589	-0.0725427	0.0423212	0.100393	0.124526	0.102221	0.0156467	-0.142133	-0.379007	-0.605922	-0.788293	-0.857139	-0.868913	-0.908757	-1.02075	-1.14368	-1.28985	-1.41438	-1.51266	-1.58658	-1.60133	-1.5846	-1.55773	-1.53788	-1.55814	-1.55916	-1.5414	-1.5149	-1.47245	-1.50523	-1.54122	-1.6102
0.640978	0.636233	0.644003	0.678724	0.671165	0.613405	0.501349	0.325848	0.147743	-0.0249349	-0.15004	-0.1921	-0.187295	-0.200491	-0.350361	-0.565599	-0.781551	-0.866665	-0.85436	-0.746351	-0.699499	-0.769533	-0.901728	-1.05357	-1.22431	-1.41487	-1.63975	-1.85397	-2.02012	-2.15119	-2.2365	-2.31705	-2.38553	-2.37543	-2.35378	-2.35144	-2.43753	-2.63501	-2.87134	-3.06621	-3.11921	-3.03813	-2.89577	-2.7215	-2.51882	-2.39206	-2.35189	-2.47127	-2.68408	-2.89999
0.713362	0.56115	0.451581	0.316637	0.177175	0.137817	0.285264	0.569972	0.867627	1.036	1.07164	0.907059	0.697161	0.548588	0.530963	0.611173	0.620666	0.48905	0.249962	-0.0324047	-0.274261	-0.425883	-0.50926	-0.511753	-0.471048	-0.456036	-0.484916	-0.608095	-0.759814	-0.915195	-0.985635	-0.994554	-1.03304	-1.12893	-1.21999	-1.26474	-1.15622	-0.986974	-0.844362	-0.848839	-0.971562	-1.04275	-1.09477	-1.13294	-1.21983	-1.25063	-1.23736	-1.13713	-1.06316	-1.09253
-0.316543	-0.412971	-0.491664	-0.580956	-0.652508	-0.722204	-0.726613	-0.670835	-0.602787	-0.640097	-0.796294	-0.969895	-1.07481	-1.07825	-0.99244	-0.789203	-0.581884	-0.399945	-0.347049	-0.383753	-0.44677	-0.461954	-0.380665	-0.219186	-0.0768222	-0.0439471	-0.170926	-0.401389	-0.700639	-0.996014	-1.30663	-1.56452	-1.69355	-1.76431	-1.7497	-1.68552	-1.57258	-1.39799	-1.13273	-0.866457	-0.655749	-0.524223	-0.46798	-0.454023	-0.360092	-0.197589	-0.112451	-0.193004	-0.470281	-0.827055
-0.191367	-0.235568	-0.273255	-0.311511	-0.350059	-0.338852	-0.224331	-0.0872472	0.0290191	0.0209115	-0.124377	-0.344124	-0.580531	-0.710664	-0.756858	-0.689742	-0.574586	-0.416807	-0.2259	-0.0987369	-0.0492418	-0.0822852	-0.183094	-0.400332	-0.73715	-1.11099	-1.36483	-1.40241	-1.23397	-0.982067	-0.820768	-0.837478	-0.983031	-1.15259	-1.26897	-1.27658	-1.21879	-1.08776	-0.983121	-0.930077	-0.923753	-0.906268	-0.845441	-0.787665	-0.774633	-0.828173	-0.900686	-0.98418	-0.998366	-0.971458
-0.864505	-0.715629	-0.604187	-0.462108	-0.355804	-0.28157	-0.220256	-0.147183	-0.0440989	0.07872	0.132663	0.100206	-0.0272673	-0.268017	-0.523127	-0.727721	-0.834201	-0.832198	-0.695505	-0.510873	-0.389821	-0.385231	-0.472997	-0.56125	-0.602371	-0.591134	-0.651249	-0.880514	-1.31521	-1.7642	-2.06329	-2.1895	-2.15948	-2.07033	-1.93931	-1.79345	-1.68054	-1.60113	-1.50326	-1.46785	-1.40617	-1.30702	-1.21534	-1.28691	-1.54497	-1.99201	-2.46013	-2.73519	-2.7457	-2.47277
0.188701	0.295332	0.337408	0.297431	0.21978	0.159292	0.148246	0.224422	0.349398	0.470039	0.550083	0.606553	0.640404	0.58202	0.424021	0.26029	0.169252	0.153562	0.201962	0.214748	0.178455	0.108319	0.0245223	-0.0648989	-0.108576	-0.129922	-0.145047	-0.209457	-0.339731	-0.535831	-0.76814	-1.00484	-1.22137	-1.43994	-1.6371	-1.82521	-1.95874	-2.05496	-2.04769	-1.92122	-1.74187	-1.54162	-1.41606	-1.40969	-1.50599	-1.61253	-1.72634	-1.85119	-1.96489	-2.02584
0.193658	0.0972336	-0.0941173	-0.275163	-0.385263	-0.336789	-0.0999292	0.1605	0.338646	0.369919	0.284012	0.149386	0.0238162	-0.0511607	-0.0411639	0.00665698	0.0608036	0.0689592	0.000104342	-0.188555	-0.399992	-0.645804	-0.836011	-1.03628	-1.23655	-1.39066	-1.42452	-1.28586	-1.09036	-0.930047	-0.933754	-1.03287	-1.12635	-1.16697	-1.10509	-1.03291	-1.02348	-1.11864	-1.29412	-1.43682	-1.42592	-1.20828	-0.88203	-0.577362	-0.372256	-0.210185	-0.120241	-0.0372112	-0.0417066	-0.113747
-0.0156686	-0.130466	-0.186703	-0.183489	-0.11891	-0.0364068	0.0192916	0.0134201	-0.0452372	-0.141425	-0.209924	-0.219614	-0.257651	-0.331395	-0.400642	-0.446118	-0.424459	-0.33787	-0.232695	-0.12863	-0.0417612	-0.018976	-0.121807	-0.367112	-0.651373	-0.878187	-0.968851	-0.979902	-1.00259	-1.09625	-1.28848	-1.56862	-1.84265	-2.03919	-2.08077	-1.98502	-1.8384	-1.6478	-1.48498	-1.39312	-1.32792	-1.286	-1.28357	-1.28054	-1.24315	-1.09432	-0.914909	-0.723891	-0.624269	-0.631697
-0.734573	-0.678603	-0.625518	-0.542558	-0.482462	-0.438331	-0.43498	-0.487098	-0.556226	-0.654906	-0.73008	-0.842025	-0.99265	-1.12601	-1.24575	-1.33531	-1.37856	-1.36632	-1.293	-1.2289	-1.23284	-1.31326	-1.45934	-1.6072	-1.68741	-1.73167	-1.79165	-1.88021	-1.95954	-2.02925	-2.06267	-2.0675	-2.07653	-2.07457	-2.09217	-2.07323	-1.98725	-1.79365	-1.59016	-1.46667	-1.5378	-1.7603	-2.09335	-2.37268	-2.4564	-2.37795	-2.29639	-2.33801	-2.49641	-2.71804
-0.133576	-0.230537	-0.374982	-0.61575	-0.869387	-1.047	-1.15845	-1.23167	-1.33422	-1.49192	-1.65504	-1.70528	-1.57112	-1.28027	-0.90741	-0.565606	-0.305009	-0.132035	-0.0375765	-0.0836018	-0.254255	-0.421522	-0.519988	-0.559521	-0.628223	-0.745093	-0.877008	-1.01826	-1.13616	-1.25516	-1.44147	-1.67707	-1.87901	-1.99383	-2.05462	-2.07856	-2.06007	-2.00831	-1.91651	-1.80112	-1.67132	-1.53789	-1.46018	-1.44736	-1.46614	-1.50952	-1.54111	-1.58107	-1.59052	-1.50782
0.976061	1.08688	1.13355	1.16195	1.10801	0.992856	0.84853	0.661625	0.476168	0.340482	0.262545	0.215259	0.176402	0.127916	0.033826	-0.129739	-0.316713	-0.47943	-0.551189	-0.5159	-0.355472	-0.0892803	0.197552	0.440436	0.552186	0.488313	0.307613	0.11366	-0.0752868	-0.252967	-0.437442	-0.61392	-0.741842	-0.828441	-0.921367	-1.06333	-1.21126	-1.27171	-1.21038	-0.984194	-0.718738	-0.483928	-0.32946	-0.189151	-0.0836096	0.00881025	0.0697315	0.0867187	0.100859	0.103338
0.0826877	0.222367	0.291724	0.296018	0.257018	0.167699	0.138148	0.202151	0.372025	0.64723	0.928885	1.141	1.25433	1.3256	1.41749	1.51783	1.57217	1.55887	1.43694	1.25338	1.06182	0.919162	0.784341	0.6273	0.479615	0.377686	0.279472	0.197341	0.154588	0.113658	0.16512	0.261867	0.352349	0.378856	0.333378	0.241625	0.138667	0.0155263	-0.155771	-0.319093	-0.4694	-0.542038	-0.580023	-0.584356	-0.573957	-0.539284	-0.475437	-0.449089	-0.465134	-0.634529
-1.27108	-1.10847	-0.922185	-0.676561	-0.450745	-0.292978	-0.257821	-0.337439	-0.487183	-0.723462	-1.05897	-1.44262	-1.76909	-1.90449	-1.82301	-1.5577	-1.29488	-1.14669	-1.18218	-1.33427	-1.49288	-1.51202	-1.39243	-1.24614	-1.16838	-1.24608	-1.40536	-1.57864	-1.70246	-1.8232	-1.99368	-2.15433	-2.1648	-2.02081	-1.84222	-1.70487	-1.64443	-1.70537	-1.8595	-2.03581	-2.17561	-2.28831	-2.35475	-2.43235	-2.49384	-2.59073	-2.72491	-2.77627	-2.77118	-2.73095
0.43955	0.527343	0.616072	0.68978	0.699572	0.644866	0.515798	0.332109	0.17442	0.122646	0.19021	0.361982	0.565011	0.713831	0.755548	0.710683	0.59987	0.538972	0.460656	0.387173	0.290979	0.210864	0.235681	0.408964	0.700585	1.04066	1.32343	1.46439	1.44077	1.24992	0.891575	0.530105	0.234577	0.0442596	-0.0336519	-0.0487066	-0.0393296	-0.0801895	-0.215176	-0.341575	-0.383585	-0.348954	-0.330224	-0.316423	-0.386811	-0.517917	-0.681492	-0.737907	-0.733539	-0.701792
-0.924318	-0.672529	-0.405682	-0.186442	-0.0844791	-0.102058	-0.243217	-0.398148	-0.533695	-0.698493	-0.830569	-0.933265	-0.927018	-0.818952	-0.702148	-0.544635	-0.420087	-0.364656	-0.412611	-0.563243	-0.769941	-0.974298	-1.0955	-1.0864	-0.995867	-0.932042	-1.02205	-1.21552	-1.48645	-1.77085	-2.03322	-2.30745	-2.53836	-2.66334	-2.71244	-2.67148	-2.54525	-2.41304	-2.34375	-2.40394	-2.49124	-2.56661	-2.51107	-2.35917	-2.1664	-1.9969	-1.92504	-2.00378	-2.21807	-2.36302
0.0299946	-0.10603	-0.27387	-0.440451	-0.542435	-0.568347	-0.532511	-0.394442	-0.226789	-0.0277124	0.0965145	0.147021	0.136164	0.0287448	-0.180847	-0.412054	-0.516667	-0.47287	-0.264563	-0.0117983	0.220851	0.319335	0.222114	-0.0325566	-0.342846	-0.576841	-0.652505	-0.603418	-0.461471	-0.279523	-0.059932	0.207405	0.51074	0.770031	0.883887	0.824042	0.646426	0.404991	0.17453	0.0194825	-0.10414	-0.264519	-0.439235	-0.559156	-0.534248	-0.385465	-0.186486	-0.0518647	-0.000123223	-0.0207067
-0.591261	-0.260077	0.0216371	0.209108	0.274762	0.163573	-0.0028041	-0.267645	-0.564028	-0.845493	-1.03489	-1.07661	-1.01367	-0.905609	-0.799431	-0.745406	-0.713495	-0.657897	-0.636183	-0.608729	-0.620454	-0.716678	-0.774748	-0.786029	-0.715207	-0.576785	-0.517071	-0.508423	-0.596705	-0.742096	-0.836259	-0.803036	-0.676833	-0.53119	-0.437336	-0.412384	-0.416642	-0.433348	-0.385545	-0.22178	-0.0506656	0.103652	0.152532	0.114365	-0.0221584	-0.177454	-0.299708	-0.392003	-0.434154	-0.415402
0.174586	0.261812	0.396138	0.513631	0.504503	0.371896	0.127239	-0.126455	-0.323421	-0.39164	-0.362063	-0.303371	-0.232962	-0.237355	-0.270559	-0.383778	-0.526466	-0.707973	-0.892267	-1.07817	-1.18656	-1.16836	-1.0446	-0.840302	-0.684665	-0.609208	-0.642452	-0.737207	-0.848417	-0.865683	-0.75738	-0.644394	-0.557524	-0.616797	-0.780316	-1.05294	-1.35052	-1.62631	-1.82024	-1.89524	-1.84115	-1.73179	-1.63209	-1.50879	-1.36565	-1.17911	-0.967775	-0.759797	-0.509257	-0.281437
-0.51305	-0.614803	-0.679742	-0.723367	-0.653082	-0.557559	-0.48229	-0.520701	-0.673763	-0.882821	-1.03444	-0.988855	-0.730258	-0.395943	-0.0504722	0.162319	0.193317	0.064743	-0.138305	-0.284983	-0.307955	-0.191946	0.0384072	0.314273	0.470573	0.534994	0.534133	0.457097	0.284659	0.0261855	-0.305253	-0.609154	-0.830357	-0.849765	-0.744389	-0.560043	-0.414747	-0.342421	-0.2942	-0.264109	-0.233428	-0.149879	0.0127997	0.202665	0.394205	0.555051	0.623514	0.597232	0.471285	0.27145
1.38881	1.36457	1.35049	1.37777	1.4149	1.44064	1.40301	1.34631	1.20267	1.00003	0.753917	0.548159	0.433644	0.408716	0.462197	0.563257	0.664603	0.708717	0.669184	0.54014	0.394924	0.235923	0.152305	0.0835294	0.029591	0.0167214	-0.0016356	-0.0785692	-0.173762	-0.288146	-0.399805	-0.515737	-0.622011	-0.698138	-0.761051	-0.77314	-0.745603	-0.694379	-0.648275	-0.584671	-0.5718	-0.549854	-0.508691	-0.455298	-0.449581	-0.486336	-0.634287	-0.815602	-1.04053	-1.23503
0.544357	0.464586	0.395881	0.344998	0.275139	0.22791	0.154315	0.0510684	-0.0323632	-0.0525817	0.0420151	0.156456	0.158877	0.0452063	-0.171573	-0.511336	-0.838018	-1.13889	-1.35102	-1.54545	-1.76239	-1.94162	-2.05735	-2.03515	-1.92083	-1.777	-1.69382	-1.70052	-1.75276	-1.72695	-1.63021	-1.50155	-1.36524	-1.30639	-1.25019	-1.16753	-1.00727	-0.746071	-0.406356	-0.127565	0.000970762	0.0212388	0.0483203	0.127504	0.182344	0.205781	0.180798	0.230256	0.442955	0.804835
-0.259771	-0.473068	-0.719776	-0.959766	-1.1971	-1.38087	-1.5247	-1.61687	-1.5955	-1.45967	-1.26108	-1.11179	-1.06232	-1.07038	-1.13485	-1.16624	-1.08081	-0.909073	-0.778189	-0.750298	-0.885711	-1.10892	-1.41829	-1.75742	-2.05555	-2.32093	-2.48843	-2.62781	-2.71055	-2.87039	-3.06402	-3.1716	-3.06282	-2.83061	-2.53279	-2.31099	-2.27153	-2.39495	-2.52717	-2.61089	-2.64792	-2.65962	-2.65936	-2.59282	-2.46406	-2.28293	-2.10931	-2.02909	-1.98929	-1.96992
-1.24137	-1.27711	-1.26803	-1.1824	-1.06021	-0.90982	-0.838439	-0.906088	-1.09637	-1.30107	-1.50943	-1.64815	-1.67556	-1.62889	-1.57591	-1.56254	-1.64933	-1.82977	-1.9897	-2.02865	-1.84287	-1.5223	-1.21553	-1.10322	-1.24344	-1.53026	-1.85373	-2.14594	-2.37687	-2.61825	-2.8877	-3.14856	-3.34282	-3.41818	-3.38016	-3.25402	-3.06624	-2.84176	-2.66815	-2.57367	-2.5882	-2.71476	-2.94985	-3.20383	-3.3384	-3.33572	-3.19097	-2.97584	-2.84749	-2.7672
-1.79518	-1.87263	-1.9508	-1.97603	-1.93519	-1.83536	-1.76812	-1.7425	-1.78237	-1.91224	-2.01491	-2.02967	-1.94935	-1.8135	-1.64401	-1.49976	-1.44662	-1.53847	-1.72241	-1.93076	-2.09305	-2.17432	-2.07882	-1.85458	-1.57248	-1.341	-1.23311	-1.28376	-1.45915	-1.68878	-1.89639	-2.06065	-2.16852	-2.19589	-2.14548	-2.07343	-2.02354	-2.03132	-2.10312	-2.24803	-2.41746	-2.51059	-2.52587	-2.46744	-2.33326	-2.18927	-2.02155	-1.84656	-1.66039	-1.50765
0.888059	0.718694	0.488049	0.284194	0.174696	0.210722	0.342771	0.529309	0.662017	0.661491	0.586689	0.459879	0.386356	0.314674	0.325123	0.361271	0.447718	0.48806	0.457109	0.340833	0.189238	0.138149	0.164781	0.254651	0.294624	0.304298	0.204674	-0.034252	-0.409549	-0.848512	-1.30028	-1.7006	-1.92642	-1.95555	-1.85528	-1.6827	-1.49507	-1.36928	-1.27787	-1.14783	-0.985595	-0.816139	-0.719414	-0.69857	-0.797954	-1.02644	-1.23323	-1.35272	-1.36662	-1.32307
-1.16439	-1.01895	-0.80978	-0.540167	-0.232471	0.0222096	0.203054	0.366983	0.520197	0.647407	0.731134	0.737517	0.70093	0.704701	0.682052	0.631614	0.547255	0.33761	0.114473	-0.111768	-0.267195	-0.332941	-0.319268	-0.151567	0.0149091	0.0418844	-0.123078	-0.431024	-0.702719	-0.853474	-0.871269	-0.82226	-0.790376	-0.835586	-0.946326	-1.11456	-1.26616	-1.37906	-1.44676	-1.40408	-1.2728	-1.07769	-0.788928	-0.516373	-0.264336	-0.104961	-0.0828284	-0.110636	-0.229844	-0.39962
-0.379711	-0.265595	-0.115677	0.0194256	0.179011	0.374005	0.522058	0.638983	0.653741	0.528952	0.330294	0.214792	0.187406	0.285881	0.422514	0.562953	0.684879	0.73288	0.775759	0.817802	0.788413	0.624375	0.365652	0.0834416	-0.194917	-0.27172	-0.0901142	0.211238	0.459577	0.576043	0.561742	0.515997	0.4602	0.464482	0.533826	0.615215	0.635912	0.514255	0.252856	-0.060364	-0.214638	-0.234319	-0.156171	-0.130843	-0.189275	-0.256292	-0.261075	-0.117361	0.100296	0.317165
-0.6324	-0.534342	-0.468081	-0.454039	-0.441284	-0.323429	-0.120367	0.0370999	0.112561	0.128335	0.116564	0.0889209	0.163905	0.353622	0.609946	0.71952	0.600777	0.345606	0.0161312	-0.18406	-0.19656	0.0161531	0.276314	0.425031	0.39606	0.293852	0.161641	0.0919901	0.127486	0.229805	0.373947	0.465979	0.392827	0.188017	0.0176368	-0.0544053	0.0037804	0.0559392	-0.0384323	-0.277811	-0.564342	-0.82278	-0.870728	-0.730644	-0.47126	-0.162557	0.118096	0.323901	0.425563	0.518167
-0.281326	-0.163327	-0.0336563	0.0893436	0.204652	0.240481	0.213801	0.163058	0.113111	0.0966856	0.0821294	0.0776592	0.123121	0.257656	0.401118	0.467655	0.415795	0.247475	0.0752322	0.019595	0.0486089	0.13241	0.198512	0.238374	0.243254	0.201949	0.118494	0.0474391	-0.0278422	-0.00195971	0.0955819	0.229689	0.293742	0.317482	0.310458	0.273269	0.251971	0.226145	0.231669	0.234936	0.202539	0.148395	0.0858757	0.0549268	0.0922349	0.119889	0.121796	0.11406	0.137556	0.194289
0.423816	0.442438	0.365917	0.235874	0.114917	0.0408699	0.00279825	-0.0813963	-0.161917	-0.183775	-0.0490396	0.192737	0.477795	0.726481	0.834941	0.919931	0.913209	0.827776	0.620228	0.337839	0.104758	-0.056224	-0.152357	-0.194289	-0.129712	-0.0525223	0.0712115	0.18949	0.27621	0.291564	0.269004	0.21392	0.17955	0.207533	0.262825	0.345442	0.393106	0.30263	0.122507	-0.0908183	-0.2622	-0.335153	-0.355719	-0.380533	-0.403646	-0.486234	-0.552638	-0.593123	-0.556671	-0.489688
-0.779136	-0.626392	-0.437842	-0.19818	0.007522	0.102085	-0.00704977	-0.253172	-0.543074	-0.758588	-0.767883	-0.520443	-0.0871015	0.364588	0.711049	0.89732	0.897877	0.744218	0.528512	0.274531	0.0789157	-0.0339187	-0.0735956	-0.0916911	-0.129407	-0.109862	0.00191477	0.155734	0.333172	0.483205	0.537338	0.53454	0.436951	0.215326	-0.155982	-0.586525	-1.06498	-1.4652	-1.73106	-1.79493	-1.60745	-1.13955	-0.581958	-0.00591955	0.403611	0.66272	0.767895	0.697807	0.475915	0.206361
-0.177051	-0.00597727	0.0908003	0.115389	0.0879517	0.0714993	0.0872442	0.128164	0.194621	0.197926	0.0787816	-0.116723	-0.2735	-0.324147	-0.292918	-0.217286	-0.212964	-0.288885	-0.385626	-0.401422	-0.29005	-0.149108	-0.0227032	0.0182165	-0.0107301	0.00501597	0.0760983	0.155677	0.202228	0.225222	0.251986	0.316417	0.416834	0.546331	0.660529	0.703764	0.646707	0.534874	0.419388	0.307414	0.220436	0.132361	0.058675	0.0151	-0.0112946	-0.0156859	0.0432578	0.0729211	0.0647015	0.015455
-0.295295	-0.341568	-0.334605	-0.255361	-0.0711662	0.180528	0.406087	0.538629	0.594536	0.624832	0.637225	0.6093	0.531886	0.452896	0.390843	0.355266	0.335813	0.339182	0.328581	0.357187	0.423296	0.540319	0.642095	0.675412	0.546977	0.32255	0.0551859	-0.103317	-0.131308	-0.0722029	0.0444256	0.14456	0.191665	0.16133	0.0299513	-0.168102	-0.348921	-0.510067	-0.57961	-0.641988	-0.754921	-0.920153	-1.04419	-1.08141	-0.97885	-0.823368	-0.683279	-0.607852	-0.615509	-0.697491
0.543532	0.581866	0.560254	0.456911	0.363398	0.30612	0.259136	0.236421	0.190283	0.101881	0.0490982	0.0732027	0.15857	0.266444	0.324417	0.280523	0.196505	0.0938971	0.0444383	0.0919917	0.158331	0.14849	0.0283843	-0.13281	-0.24577	-0.237009	-0.103618	0.123756	0.345163	0.508349	0.56099	0.560053	0.485171	0.357417	0.205749	0.0326547	-0.217941	-0.471016	-0.771157	-1.08188	-1.32455	-1.45489	-1.41947	-1.2781	-1.11121	-0.976278	-0.892952	-0.860564	-0.853265	-0.789998
0.0679291	0.316456	0.482047	0.496354	0.322256	-0.0123252	-0.352723	-0.585603	-0.662486	-0.572893	-0.409445	-0.20475	-0.0571864	0.0073532	-0.00821183	-0.0980158	-0.253187	-0.400468	-0.512582	-0.543085	-0.421968	-0.174483	0.154823	0.491101	0.793826	1.01776	1.1177	1.05503	0.909879	0.741258	0.670166	0.713288	0.797684	0.822929	0.649293	0.270475	-0.172287	-0.539984	-0.758417	-0.83975	-0.866391	-0.950126	-1.05336	-1.14714	-1.14704	-1.01758	-0.868855	-0.788624	-0.812638	-0.944008
-0.205032	-0.0574849	0.0988455	0.269823	0.369334	0.397665	0.34451	0.277867	0.293951	0.374057	0.478833	0.476712	0.358319	0.148474	-0.114572	-0.307764	-0.420208	-0.422673	-0.390947	-0.308131	-0.186083	-0.0475126	0.108436	0.235164	0.377691	0.504439	0.661182	0.718139	0.70294	0.559977	0.358941	0.183265	0.0363648	-0.06575	-0.180131	-0.253522	-0.319283	-0.349075	-0.3511	-0.340292	-0.388411	-0.430836	-0.459717	-0.42509	-0.33262	-0.218157	-0.0980573	-0.0293074	-0.00429771	-0.0367175
0.123659	0.270297	0.341722	0.320231	0.229254	0.141835	0.109631	0.0816226	0.0517476	-0.0367786	-0.133853	-0.241433	-0.280041	-0.250844	-0.273534	-0.305416	-0.288723	-0.218041	-0.0937201	0.0466444	0.082329	-0.00349931	-0.153828	-0.288192	-0.347285	-0.366896	-0.415341	-0.454507	-0.523755	-0.498849	-0.44287	-0.348397	-0.254936	-0.256718	-0.401927	-0.608334	-0.717428	-0.720427	-0.631203	-0.586116	-0.656639	-0.738599	-0.758752	-0.616275	-0.444891	-0.206943	-0.0278707	-0.0361401	-0.167364	-0.310803
0.210784	0.326281	0.4022	0.462404	0.513757	0.600417	0.719783	0.912542	1.14983	1.32307	1.34412	1.22834	1.05461	0.897126	0.817436	0.836514	0.882456	0.904496	0.89709	0.825021	0.756359	0.749063	0.77416	0.717582	0.562428	0.356377	0.230953	0.30234	0.505948	0.734036	0.896518	0.883378	0.731654	0.545515	0.404723	0.364238	0.362339	0.379496	0.327465	0.212179	0.056737	-0.0325812	-0.0797065	-0.0554655	0.0421202	0.159084	0.261692	0.296569	0.285909	0.257844
1.11466	1.04071	1.02912	1.08981	1.18641	1.21765	1.09359	0.804131	0.457216	0.16307	0.0477562	0.094798	0.267037	0.35464	0.354776	0.218294	0.0144442	-0.172658	-0.196181	-0.0420851	0.272186	0.557306	0.704983	0.726297	0.632649	0.475203	0.316347	0.210325	0.159437	0.167169	0.20013	0.244639	0.280643	0.339093	0.419103	0.503578	0.540349	0.458051	0.276166	0.0180413	-0.149768	-0.161499	-0.0917884	-0.0454696	-0.160396	-0.407145	-0.696201	-0.90007	-0.961185	-0.879361
0.533097	0.525911	0.420155	0.299983	0.186057	0.0934983	0.0718252	0.100065	0.105892	0.044063	-0.0506475	-0.206896	-0.36147	-0.489841	-0.573136	-0.603806	-0.598343	-0.59222	-0.587695	-0.588979	-0.627001	-0.701032	-0.773166	-0.764727	-0.630812	-0.379771	-0.138128	0.0765911	0.224788	0.323904	0.457286	0.567006	0.594409	0.569262	0.510804	0.434691	0.337202	0.203876	-0.00898821	-0.220677	-0.421055	-0.513944	-0.55732	-0.593111	-0.624845	-0.668121	-0.629376	-0.444827	-0.148353	0.0711484
0.711311	0.591376	0.496961	0.480345	0.541459	0.601965	0.660867	0.661412	0.707574	0.754318	0.81374	0.796551	0.659743	0.366334	0.0716338	-0.218257	-0.403115	-0.501084	-0.520968	-0.474997	-0.463132	-0.527541	-0.615015	-0.745287	-0.836369	-0.881893	-0.865958	-0.838761	-0.865612	-0.938584	-1.09643	-1.31961	-1.55476	-1.72321	-1.72673	-1.63331	-1.38831	-1.02536	-0.680725	-0.434557	-0.289925	-0.31476	-0.459305	-0.620874	-0.736517	-0.744425	-0.597732	-0.431789	-0.292837	-0.280095
-0.654668	-0.60585	-0.514247	-0.44969	-0.377976	-0.37765	-0.47026	-0.589635	-0.746699	-0.808239	-0.770751	-0.650189	-0.466774	-0.26422	-0.0945294	0.114833	0.241135	0.260081	0.160128	0.0216518	-0.0912576	-0.13207	-0.107568	-0.0683666	-0.0089245	0.0715729	0.191147	0.283945	0.247139	0.083399	-0.108444	-0.282177	-0.403057	-0.448328	-0.520324	-0.614229	-0.642104	-0.606035	-0.451015	-0.218132	0.00306044	0.127808	0.155262	0.104808	0.010758	-0.11015	-0.261176	-0.314789	-0.226446	-0.0486912
-0.424685	-0.332958	-0.254482	-0.183588	-0.12844	-0.146223	-0.166259	-0.207787	-0.268461	-0.357747	-0.472164	-0.642278	-0.857315	-1.14479	-1.45774	-1.64349	-1.72044	-1.65613	-1.5164	-1.29396	-1.04545	-0.772847	-0.521918	-0.377646	-0.289388	-0.27416	-0.257627	-0.249367	-0.343991	-0.422517	-0.444447	-0.422311	-0.455744	-0.474802	-0.495023	-0.485042	-0.430939	-0.386329	-0.475153	-0.768203	-1.16025	-1.53324	-1.73352	-1.71633	-1.55376	-1.36023	-1.24706	-1.23452	-1.22676	-1.16756
-0.30938	-0.124317	0.110082	0.282969	0.403734	0.43486	0.457969	0.4214	0.419243	0.391607	0.384925	0.394345	0.454085	0.527614	0.656935	0.813331	0.963843	1.11283	1.23111	1.27838	1.2787	1.22393	1.12164	1.03512	0.948442	0.950118	0.945945	0.935298	0.916688	0.899517	0.848709	0.831782	0.889501	0.992742	1.09162	1.1284	1.06793	0.987962	0.922055	0.872651	0.778018	0.617601	0.387383	0.23388	0.133425	0.112703	0.146423	0.20396	0.297256	0.385054
0.762192	0.752284	0.787512	0.833434	0.945724	1.05206	1.08783	1.03144	0.846782	0.502209	0.104129	-0.257235	-0.358892	-0.22958	0.0540105	0.390537	0.625997	0.655359	0.523382	0.301849	0.09129	0.0898081	0.28804	0.716077	1.15414	1.51397	1.6919	1.68982	1.61906	1.557	1.51084	1.36898	1.16265	0.962868	0.856777	0.827609	0.824875	0.798224	0.682842	0.45495	0.147824	-0.0868343	-0.2167	-0.163036	0.0316317	0.267681	0.430704	0.431053	0.339694	0.288979
0.476686	0.412756	0.379006	0.470672	0.584941	0.699252	0.719308	0.686728	0.610304	0.59301	0.686196	0.84524	1.01436	1.08313	1.07526	0.937535	0.737571	0.453558	0.172612	-0.0237522	-0.106165	-0.10913	-0.10659	-0.0840698	-0.0504142	-0.00121912	0.0542034	0.10844	0.117732	0.13718	0.171448	0.21742	0.252128	0.255237	0.239839	0.230527	0.228222	0.181031	0.0239657	-0.236044	-0.520501	-0.738477	-0.893286	-0.93828	-0.914521	-0.813894	-0.663764	-0.527231	-0.528101	-0.698668
0.854291	0.708235	0.491901	0.23687	-0.00234089	-0.167298	-0.243983	-0.222399	-0.149945	-0.0812538	-0.0205513	0.0599417	0.185511	0.359596	0.525894	0.619805	0.576079	0.480741	0.361908	0.260396	0.178302	0.0892055	-0.00453836	-0.113599	-0.244841	-0.398831	-0.573939	-0.736791	-0.856435	-0.910095	-0.880298	-0.725228	-0.514955	-0.304812	-0.143317	-0.132789	-0.173159	-0.202863	-0.124243	0.000465909	0.0765805	0.104996	0.0673221	0.0502222	0.0529986	0.13038	0.140509	0.132454	0.0565843	-0.0926408
0.688773	0.900455	1.02786	1.02514	0.896028	0.707333	0.583857	0.553777	0.558779	0.576114	0.526601	0.396075	0.254372	0.152277	0.189015	0.323661	0.52011	0.665096	0.761601	0.772455	0.731531	0.712857	0.699503	0.677698	0.597625	0.554751	0.568514	0.626639	0.721842	0.764281	0.733834	0.627202	0.526317	0.428894	0.319618	0.210693	0.111012	0.0794097	0.056458	0.0152515	-0.0379477	-0.138348	-0.188734	-0.148787	-0.0162926	0.0881309	0.0737584	-0.0845523	-0.336824	-0.555809
-0.997926	-0.691446	-0.281214	0.140196	0.47241	0.728214	0.850095	0.772809	0.690339	0.645924	0.723185	0.782245	0.700722	0.472447	0.120868	-0.168565	-0.277513	-0.0944324	0.227503	0.623315	0.976179	1.29127	1.46162	1.49907	1.3905	1.17464	0.891252	0.572784	0.323508	0.205392	0.231024	0.340675	0.514428	0.664663	0.721977	0.718838	0.780833	0.849403	0.98566	1.10822	1.16352	1.13543	1.10888	1.12384	1.15705	1.19268	1.17872	1.16428	1.13599	1.13565
-0.699897	-0.731606	-0.745823	-0.737548	-0.713745	-0.666764	-0.502682	-0.314695	-0.127034	-0.0253725	-0.0896266	-0.22367	-0.300211	-0.239192	-0.0152617	0.282464	0.490946	0.656875	0.724356	0.774523	0.856026	0.948655	0.991988	0.977432	0.822214	0.574842	0.275481	0.049279	-0.105074	-0.200268	-0.272191	-0.330436	-0.315388	-0.2583	-0.224268	-0.266597	-0.413221	-0.576972	-0.623906	-0.600535	-0.597907	-0.693256	-0.84321	-0.929417	-0.902816	-0.78554	-0.616945	-0.486597	-0.355237	-0.258302
-0.389588	-0.380345	-0.368707	-0.37201	-0.398349	-0.426069	-0.512462	-0.618188	-0.715498	-0.709888	-0.556273	-0.30071	-0.0745732	0.0725406	0.0454737	-0.0624023	-0.244951	-0.477558	-0.661592	-0.794945	-0.807442	-0.725923	-0.474582	-0.133915	0.192859	0.343437	0.348772	0.194776	-0.0872026	-0.377695	-0.572665	-0.676345	-0.689227	-0.655391	-0.601105	-0.511861	-0.441397	-0.415385	-0.45153	-0.554197	-0.676579	-0.769022	-0.863737	-0.921478	-1.00834	-1.08897	-1.08026	-0.982792	-0.796721	-0.572086
0.641332	0.706845	0.770801	0.838913	0.930761	0.981542	0.962203	0.812543	0.588541	0.405364	0.303415	0.330066	0.404993	0.409052	0.269285	-0.000319212	-0.248609	-0.394362	-0.41033	-0.295481	-0.205142	-0.175764	-0.242256	-0.289209	-0.249136	-0.053302	0.250104	0.543425	0.727287	0.783921	0.780477	0.721646	0.608532	0.508642	0.405918	0.268414	0.133549	0.0802015	0.119228	0.239477	0.292436	0.228104	0.0244985	-0.295449	-0.519629	-0.581883	-0.423611	-0.169418	0.0953786	0.160888
0.125786	-0.154563	-0.43003	-0.603825	-0.620761	-0.540856	-0.475816	-0.547613	-0.762348	-1.06877	-1.27835	-1.33066	-1.25161	-1.0907	-0.911528	-0.656568	-0.406999	-0.179414	0.00398043	0.126891	0.175449	0.109784	-0.0636553	-0.292205	-0.464144	-0.558033	-0.526472	-0.472375	-0.43958	-0.420461	-0.4131	-0.435193	-0.525983	-0.636834	-0.741609	-0.8006	-0.778286	-0.650838	-0.51724	-0.430563	-0.405174	-0.511545	-0.653345	-0.844776	-1.06615	-1.28277	-1.47681	-1.65967	-1.78595	-1.818
-0.555857	-0.408273	-0.318637	-0.288176	-0.351124	-0.443213	-0.525043	-0.544452	-0.423464	-0.238785	-0.00871305	0.213991	0.36562	0.42619	0.378649	0.246565	0.10221	0.0249313	0.03041	0.0377819	-0.0227943	-0.147765	-0.307099	-0.477059	-0.568545	-0.5917	-0.589874	-0.488985	-0.33891	-0.119954	0.0990346	0.253392	0.315331	0.281519	0.119575	-0.111	-0.361223	-0.527223	-0.599393	-0.550513	-0.438607	-0.342118	-0.29685	-0.333276	-0.421175	-0.505425	-0.585206	-0.626271	-0.614552	-0.550891
-0.173522	-0.066446	0.0834613	0.227149	0.338071	0.345814	0.232575	0.0299803	-0.0797646	-0.101373	-0.069871	-0.0205249	-0.0595743	-0.193045	-0.411538	-0.574311	-0.626723	-0.636155	-0.661479	-0.720027	-0.775462	-0.841577	-0.821664	-0.766041	-0.607494	-0.389222	-0.154895	0.115331	0.246792	0.251511	0.17244	-0.00997163	-0.277447	-0.605788	-0.867084	-1.02887	-1.06018	-1.0335	-0.934852	-0.805601	-0.703877	-0.651812	-0.664365	-0.714609	-0.7348	-0.738856	-0.68254	-0.663942	-0.690796	-0.773604
0.760816	0.693597	0.67626	0.689472	0.726002	0.742326	0.735155	0.730769	0.725912	0.677788	0.540124	0.320874	0.0338317	-0.271622	-0.587441	-0.898386	-1.12279	-1.11702	-0.919356	-0.644981	-0.487609	-0.463153	-0.577505	-0.694613	-0.696681	-0.573057	-0.407852	-0.263408	-0.108593	0.096524	0.402295	0.681879	0.853305	0.837916	0.632447	0.411355	0.23719	0.156163	0.142275	0.18036	0.198638	0.170435	0.115177	0.0382354	-0.0972242	-0.213911	-0.25233	-0.224665	-0.0875556	0.0593436
1.08472	1.06833	0.969208	0.734548	0.446915	0.102155	-0.217901	-0.444437	-0.591835	-0.68681	-0.774958	-0.739663	-0.571091	-0.268691	-0.0221872	0.0499038	-0.111251	-0.368695	-0.621037	-0.735465	-0.7644	-0.744186	-0.779113	-0.867759	-0.964727	-0.99719	-0.894897	-0.631394	-0.304783	0.0323849	0.272465	0.323775	0.260075	0.0907792	-0.0599265	-0.185391	-0.168468	-0.0870336	0.0382326	0.133919	0.179197	0.13392	0.0689228	0.029316	0.0210106	0.0556597	0.11071	0.202955	0.239646	0.250476
1.64593	1.46433	1.33541	1.24269	1.21222	1.19658	1.14788	1.00261	0.780226	0.535845	0.373035	0.330821	0.378895	0.472319	0.529722	0.574993	0.597572	0.615499	0.575532	0.457449	0.308165	0.118024	0.0102556	0.0239213	0.124252	0.26712	0.414009	0.521594	0.567408	0.542574	0.484196	0.471056	0.532349	0.608694	0.68522	0.693379	0.659207	0.639238	0.619987	0.592293	0.523206	0.395615	0.214844	0.0116636	-0.188272	-0.313596	-0.373737	-0.384948	-0.379556	-0.391696
0.0963291	0.203267	0.276954	0.282007	0.19799	0.0410346	-0.118444	-0.217161	-0.183117	-0.0467185	0.137274	0.326207	0.496514	0.628965	0.696461	0.688017	0.587133	0.467463	0.31424	0.154746	0.0294287	-0.029987	0.00421971	0.157012	0.356129	0.468333	0.405076	0.182013	-0.0370998	-0.197706	-0.235084	-0.150849	-0.0426745	0.0308318	0.0155396	-0.0438243	-0.0804304	-0.12209	-0.200798	-0.322235	-0.408726	-0.359162	-0.133405	0.17357	0.513978	0.715229	0.742892	0.642596	0.494228	0.389994
0.429952	0.176619	-0.0283295	-0.170925	-0.194193	-0.108197	0.0251654	0.126392	0.118272	0.0514186	-0.0546794	-0.139281	-0.194007	-0.193727	-0.223465	-0.26754	-0.318673	-0.404053	-0.489725	-0.586279	-0.656156	-0.65125	-0.526558	-0.271596	0.0437671	0.306148	0.472665	0.454578	0.336957	0.156264	0.0156883	0.0226882	0.135045	0.325606	0.422189	0.336655	0.139129	-0.0686585	-0.179955	-0.223039	-0.209986	-0.188955	-0.177642	-0.137372	-0.0968616	-0.109705	-0.198439	-0.338716	-0.446177	-0.448843
0.103862	0.344127	0.658069	0.958897	1.2283	1.34658	1.31039	1.1169	0.837886	0.546432	0.3119	0.221012	0.24195	0.275086	0.212057	0.0628099	-0.164794	-0.359245	-0.485081	-0.483837	-0.391518	-0.261768	-0.138805	-0.00590107	0.0353987	-0.015485	-0.0622763	-0.113024	-0.17722	-0.249353	-0.323792	-0.352209	-0.327579	-0.334411	-0.382706	-0.473301	-0.483233	-0.36219	-0.0875819	0.238436	0.423686	0.344413	0.0895495	-0.244081	-0.574296	-0.772271	-0.860147	-0.827075	-0.689529	-0.45083
-0.335751	-0.019072	0.229138	0.34884	0.318273	0.194024	0.0810636	0.0566945	0.105246	0.157697	0.0701088	-0.113133	-0.299682	-0.457166	-0.555227	-0.640172	-0.717299	-0.758525	-0.755772	-0.739559	-0.702944	-0.593258	-0.437463	-0.242679	0.0267146	0.262489	0.409226	0.420287	0.370373	0.317227	0.263981	0.259623	0.25934	0.238689	0.16758	0.0763598	-0.0971931	-0.303074	-0.528495	-0.739604	-0.901991	-0.976417	-0.921354	-0.757689	-0.49184	-0.228026	-0.0341508	0.0197558	-0.101231	-0.309926
-0.480894	-0.232185	0.0558373	0.363665	0.557711	0.565255	0.419944	0.208529	0.0162603	-0.107163	-0.255678	-0.399218	-0.416005	-0.312476	-0.10307	0.119539	0.33023	0.489177	0.617081	0.66756	0.676362	0.569	0.336764	0.0896919	-0.0793618	-0.0901659	0.0345957	0.262691	0.498833	0.646898	0.67464	0.611232	0.562321	0.509755	0.458368	0.374634	0.205887	-0.0217919	-0.203179	-0.280565	-0.303002	-0.308613	-0.347934	-0.463708	-0.567213	-0.627876	-0.634301	-0.645413	-0.672838	-0.707956
0.88402	0.925292	1.04753	1.18118	1.3105	1.35501	1.28376	1.18406	1.15023	1.1603	1.24984	1.28226	1.23834	1.12281	0.974361	0.866543	0.774418	0.679438	0.507696	0.310476	0.0748349	-0.0591025	-0.110126	-0.103845	-0.0564269	-0.0152494	0.0437852	0.0336679	-0.0233765	-0.0738367	-0.0939866	0.0188446	0.264988	0.454518	0.496544	0.348967	0.185124	0.167136	0.282972	0.402759	0.441286	0.388469	0.291082	0.224282	0.253726	0.335097	0.451631	0.502306	0.378399	0.179534
1.26224	1.1121	0.860173	0.53128	0.172946	-0.173264	-0.415177	-0.461025	-0.301559	0.0476288	0.400829	0.712744	0.899233	0.976701	0.925265	0.814386	0.636774	0.504139	0.481342	0.500645	0.571031	0.636045	0.665712	0.613917	0.524743	0.431291	0.36663	0.299056	0.195647	0.136262	0.0352668	-0.0624709	-0.147058	-0.176563	-0.130764	-0.0610937	0.0316435	0.0977801	0.170323	0.257889	0.383861	0.516005	0.564365	0.440073	0.238384	0.0170363	-0.17439	-0.165881	-0.00426086	0.207801
0.592243	0.567492	0.599024	0.600078	0.674407	0.789035	0.883355	0.925833	0.916549	0.867574	0.873101	0.89279	0.941925	0.94903	0.785174	0.489206	0.099304	-0.265054	-0.602938	-0.751937	-0.685199	-0.482577	-0.201084	0.10226	0.465928	0.774672	0.962754	0.92505	0.749137	0.508609	0.331394	0.299979	0.317667	0.419517	0.463786	0.475071	0.407261	0.288221	0.0884268	-0.0850255	-0.258897	-0.425876	-0.361829	-0.248508	-0.0965389	0.0296298	0.124826	0.19499	0.188386	0.153229
0.52597	0.39592	0.197053	0.107554	0.163304	0.401279	0.694972	0.979499	1.19508	1.26893	1.20405	1.01179	0.808472	0.628932	0.582573	0.663679	0.846675	1.0349	1.14765	1.16996	1.06913	0.910089	0.804741	0.761412	0.787172	0.873609	0.947527	1.06	1.15596	1.24942	1.25486	1.09263	0.861027	0.562344	0.321526	0.129266	-0.0099116	-0.03507	-0.00600442	0.0275546	0.0417082	0.0315383	0.0423011	0.17941	0.333283	0.47699	0.548441	0.510079	0.396611	0.307674
-0.579966	-0.512698	-0.42949	-0.305112	-0.145482	0.0882151	0.358406	0.615597	0.846334	1.03492	1.12204	1.15779	1.20081	1.28236	1.38182	1.40647	1.30156	1.11257	0.882706	0.612626	0.378989	0.224294	0.205884	0.324194	0.553523	0.77044	0.958858	1.04722	1.01644	0.885336	0.70531	0.577776	0.478475	0.428246	0.431445	0.4413	0.451321	0.40506	0.266371	0.0306349	-0.20327	-0.360374	-0.338134	-0.201246	0.0401303	0.247803	0.338753	0.328393	0.215072	0.154589
-0.41979	-0.309706	-0.204818	-0.186619	-0.209989	-0.250455	-0.225447	-0.172927	-0.167371	-0.243999	-0.354588	-0.452488	-0.470605	-0.368918	-0.230547	-0.132972	-0.136029	-0.195509	-0.1856	-0.0717392	0.096286	0.214191	0.202591	0.076333	-0.0224363	-0.0450647	0.0462468	0.184491	0.308251	0.369063	0.370791	0.290077	0.13193	-0.100793	-0.34887	-0.552195	-0.644682	-0.635897	-0.525823	-0.364992	-0.225871	-0.0872957	0.0816393	0.225039	0.303042	0.245699	0.0799294	-0.101954	-0.270129	-0.363342
0.272176	0.253263	0.195348	0.117909	0.0624074	0.0768935	0.173464	0.303957	0.381952	0.352936	0.215391	0.00153148	-0.18652	-0.272597	-0.240234	-0.147062	-0.087454	-0.0658768	-0.0805952	-0.148869	-0.219167	-0.262453	-0.270624	-0.29737	-0.3596	-0.438825	-0.536755	-0.578775	-0.548064	-0.421021	-0.295143	-0.174796	-0.123279	-0.0505643	0.0489438	0.187824	0.36319	0.493518	0.564713	0.581727	0.558406	0.526529	0.52147	0.507164	0.485324	0.390014	0.24317	0.0981793	0.00180058	-0.0256027
0.436253	0.530319	0.63584	0.783842	0.944163	1.01147	1.01412	0.921473	0.736659	0.529528	0.340785	0.254572	0.210271	0.138644	0.00478752	-0.180642	-0.378366	-0.529321	-0.576629	-0.504538	-0.415176	-0.338661	-0.243043	-0.173876	-0.129968	-0.12504	-0.216056	-0.33616	-0.416457	-0.372013	-0.222847	-0.0219211	0.154044	0.328337	0.461739	0.568986	0.637055	0.589852	0.520261	0.452102	0.439036	0.424137	0.374363	0.283831	0.221239	0.252027	0.306997	0.33792	0.323402	0.257187
-0.00137157	-0.0811793	-0.144996	-0.18759	-0.202221	-0.192469	-0.173522	-0.1423	-0.114903	-0.104994	-0.148845	-0.203721	-0.256402	-0.258312	-0.249634	-0.205746	-0.183031	-0.176817	-0.180527	-0.16459	-0.0969401	0.0355714	0.169942	0.283972	0.300373	0.265174	0.287239	0.413988	0.610174	0.730853	0.694421	0.468288	0.161813	-0.117012	-0.288391	-0.339603	-0.371991	-0.438565	-0.503224	-0.524988	-0.480109	-0.405145	-0.315449	-0.245832	-0.215143	-0.18282	-0.0869043	0.042117	0.169925	0.211202
0.462581	0.38883	0.379001	0.47166	0.600879	0.645796	0.570887	0.328764	0.043014	-0.187699	-0.320572	-0.372737	-0.376982	-0.336546	-0.262359	-0.149763	-0.125551	-0.186243	-0.334624	-0.492634	-0.636866	-0.738978	-0.768664	-0.732974	-0.651968	-0.509029	-0.329256	-0.148495	0.0736131	0.305301	0.529554	0.658234	0.6267	0.436442	0.138423	-0.122942	-0.273213	-0.309554	-0.268968	-0.232149	-0.161247	-0.0929194	-0.0300819	0.0109697	-0.0743551	-0.326903	-0.711169	-1.06814	-1.26017	-1.18016
-0.008174	-0.0934333	-0.139732	-0.23317	-0.339616	-0.403515	-0.438306	-0.395746	-0.30135	-0.228664	-0.135548	-0.0386621	0.0618352	0.198879	0.351491	0.435751	0.434039	0.340046	0.262421	0.23474	0.262807	0.252798	0.182138	0.102055	0.066259	0.0851046	0.192871	0.312547	0.386763	0.373044	0.35009	0.296183	0.260499	0.252109	0.230698	0.267756	0.404986	0.60943	0.848732	1.02677	0.968709	0.722504	0.309291	-0.103831	-0.348964	-0.39418	-0.295457	-0.159867	-0.0617808	0.0263215
-0.755344	-0.680304	-0.520148	-0.233519	0.111778	0.357622	0.436971	0.376538	0.312116	0.317896	0.379348	0.376783	0.30502	0.212211	0.114803	0.101083	0.108524	0.150568	0.212128	0.26667	0.338787	0.388012	0.41444	0.441007	0.431279	0.382047	0.262368	0.140249	0.0804904	0.18673	0.375336	0.632725	0.871522	0.938307	0.813113	0.517113	0.147616	-0.224043	-0.471488	-0.605683	-0.622532	-0.577589	-0.548189	-0.510419	-0.42847	-0.371358	-0.193943	0.00127044	0.224721	0.424952
-0.991881	-1.06311	-1.1649	-1.22871	-1.31903	-1.34584	-1.30055	-1.1734	-0.96819	-0.682781	-0.420599	-0.233345	-0.120688	-0.0708057	-0.132762	-0.270855	-0.400136	-0.351559	-0.13424	0.203898	0.588421	0.934356	1.15104	1.1689	1.02483	0.731157	0.413753	0.0955491	-0.116483	-0.189113	-0.134301	-0.0188252	0.117036	0.149014	0.0355969	-0.135053	-0.335432	-0.487083	-0.570276	-0.594741	-0.609716	-0.747366	-0.952149	-1.18261	-1.28581	-1.26831	-1.02836	-0.694707	-0.317351	-0.105881
0.262785	0.224096	0.186561	0.170048	0.179922	0.194364	0.204254	0.141071	0.0712302	0.0890372	0.176025	0.272129	0.324208	0.271005	0.140512	-0.0607298	-0.237215	-0.408104	-0.510343	-0.567973	-0.575351	-0.552554	-0.504609	-0.467252	-0.428084	-0.358242	-0.277052	-0.140573	-0.000741958	0.198955	0.388223	0.522527	0.511531	0.381372	0.230595	0.13473	0.110353	0.149162	0.198054	0.215131	0.197124	0.116286	-0.0301831	-0.196033	-0.30063	-0.325682	-0.282641	-0.202065	-0.0811881	0.0664283
0.0214396	-0.0772635	-0.230973	-0.436193	-0.584847	-0.60583	-0.419563	-0.194579	-0.00696086	0.0792556	0.0310052	-0.0934329	-0.232758	-0.312679	-0.285244	-0.154478	0.0642267	0.271576	0.3511	0.315774	0.213671	0.146553	0.120056	0.155988	0.229794	0.349775	0.432785	0.357725	0.161985	-0.0988952	-0.291102	-0.383236	-0.407814	-0.484831	-0.574963	-0.693798	-0.724833	-0.60625	-0.390411	-0.188111	-0.0755516	-0.124806	-0.275514	-0.435966	-0.620286	-0.797394	-0.877792	-0.788014	-0.568733	-0.298385
-0.124185	-0.0484183	0.024093	0.11185	0.200968	0.28049	0.348469	0.387446	0.385142	0.340086	0.266982	0.160555	0.0861524	0.113419	0.232377	0.323112	0.3226	0.24102	0.166736	0.174329	0.249029	0.321623	0.394349	0.395413	0.385408	0.455984	0.577858	0.748328	0.877382	0.947682	0.914379	0.725578	0.37702	-0.00686335	-0.354197	-0.480506	-0.471935	-0.394789	-0.314895	-0.262846	-0.205921	-0.109757	-0.0282729	-0.0137939	-0.0784342	-0.207166	-0.275148	-0.33089	-0.435529	-0.575148
0.136282	0.0437438	-0.0685936	-0.213788	-0.366105	-0.549591	-0.726088	-0.790695	-0.744627	-0.604729	-0.465079	-0.329973	-0.268789	-0.258577	-0.277003	-0.258729	-0.231019	-0.21611	-0.218957	-0.188977	-0.0942302	0.0810182	0.30372	0.485677	0.550011	0.447368	0.221499	0.010906	-0.120673	-0.178827	-0.139217	-0.0871806	-0.0108233	0.0491745	0.0642439	0.0189518	-0.0511602	-0.106268	-0.0974577	-0.00728155	0.0920587	0.140207	0.0852694	-0.0476378	-0.154019	-0.195215	-0.105331	0.0128206	0.144952	0.223516
0.474225	0.461401	0.515685	0.63417	0.809726	0.932876	0.99748	0.909351	0.721649	0.55919	0.54278	0.706439	0.966149	1.17138	1.26644	1.16807	0.948854	0.76734	0.648576	0.574742	0.54787	0.458317	0.341274	0.18956	0.122476	0.18183	0.3638	0.493431	0.535204	0.4348	0.247579	0.0877916	-0.0112249	-0.0453458	-0.0280382	0.0221439	0.0769332	0.151801	0.268007	0.420512	0.512348	0.561939	0.52147	0.42433	0.315936	0.211673	0.180622	0.194315	0.179472	0.134783
0.155015	0.0751727	-0.018601	-0.0699382	-0.137124	-0.241743	-0.335639	-0.441976	-0.517798	-0.569501	-0.570286	-0.482703	-0.334345	-0.18299	-0.132876	-0.205595	-0.31599	-0.385835	-0.323738	-0.17402	-0.0471361	-0.0194591	-0.114558	-0.314843	-0.474585	-0.534527	-0.510322	-0.352275	-0.166953	0.0759443	0.227776	0.245265	0.14877	0.00299579	-0.146328	-0.262189	-0.303986	-0.310645	-0.306458	-0.328177	-0.365846	-0.42102	-0.462336	-0.49664	-0.439145	-0.321379	-0.177897	-0.0599038	0.0438742	0.0749103
-0.148819	-0.185563	-0.258126	-0.336242	-0.381035	-0.409228	-0.387468	-0.315984	-0.195891	-0.0189331	0.180127	0.296158	0.318208	0.229737	0.0980508	0.00596398	0.0201429	0.195447	0.409991	0.572765	0.626432	0.589201	0.456296	0.221952	-0.072735	-0.320654	-0.427525	-0.39149	-0.118164	0.205061	0.423627	0.440829	0.280339	0.0615381	-0.12531	-0.280815	-0.399476	-0.520914	-0.654687	-0.697445	-0.691226	-0.628918	-0.55951	-0.497546	-0.450125	-0.3821	-0.336064	-0.305645	-0.301919	-0.289259
0.12836	0.309602	0.473454	0.649705	0.757173	0.863432	0.860553	0.72378	0.471629	0.239665	0.131483	0.0629194	-0.0162006	-0.107188	-0.145237	-0.0903937	0.0229355	0.146133	0.261354	0.320013	0.299232	0.259093	0.244238	0.327983	0.360454	0.292361	0.125243	-0.0501211	-0.217845	-0.275667	-0.220338	-0.0977841	0.0806503	0.203484	0.306169	0.438586	0.588727	0.75018	0.851113	0.844595	0.813777	0.866912	1.03657	1.32216	1.57129	1.65485	1.61241	1.39668	1.18905	1.05916
0.511122	0.256522	0.124167	0.184279	0.375275	0.596088	0.570022	0.240087	-0.285196	-0.647669	-0.647948	-0.322717	0.196807	0.586681	0.728499	0.637393	0.436734	0.253623	0.176321	0.250674	0.426905	0.602381	0.676522	0.668928	0.611638	0.650151	0.719081	0.728335	0.665768	0.571794	0.476382	0.403785	0.419149	0.531417	0.653558	0.653753	0.540449	0.333871	0.157302	0.103494	0.186566	0.30017	0.320117	0.301582	0.216503	0.118995	0.0635673	0.0665255	0.103509	0.155157
-0.691929	-0.824502	-0.815156	-0.629095	-0.258041	0.160069	0.494938	0.601699	0.424462	0.0959714	-0.22822	-0.373154	-0.277283	0.027668	0.424238	0.813636	1.11739	1.29934	1.31609	1.19679	0.966152	0.595019	0.21879	-0.125801	-0.375763	-0.567259	-0.649544	-0.524104	-0.179035	0.211175	0.50393	0.598185	0.517538	0.438195	0.403961	0.442357	0.555064	0.688307	0.808856	0.794802	0.582861	0.278044	-0.0859247	-0.375738	-0.538497	-0.547704	-0.451276	-0.330213	-0.187016	-0.0887135
-0.76203	-0.553	-0.35065	-0.187122	-0.100952	-0.0471872	0.0413096	0.193247	0.379934	0.511407	0.545116	0.491111	0.345799	0.162451	0.00737171	-0.12158	-0.176892	-0.135416	-0.075653	0.0157577	0.0925123	0.125574	0.12001	0.0591614	-0.102956	-0.246807	-0.368512	-0.437485	-0.383166	-0.350509	-0.330006	-0.331358	-0.274648	-0.168076	-0.0719743	0.0269802	0.151634	0.286935	0.42189	0.578644	0.656051	0.651145	0.528843	0.391164	0.267323	0.181873	0.105374	0.00302319	-0.101707	-0.167296
-1.19855	-1.19951	-1.18655	-1.11046	-0.936977	-0.672983	-0.389587	-0.182211	-0.0930177	-0.119051	-0.224537	-0.337888	-0.469143	-0.551463	-0.529798	-0.298262	0.0246241	0.361397	0.553681	0.569751	0.441946	0.243205	0.0365521	-0.117369	-0.208467	-0.134283	-0.00898312	0.122288	0.218939	0.304093	0.32796	0.348995	0.453268	0.523811	0.605723	0.679851	0.681049	0.602647	0.471323	0.319571	0.179963	0.0479374	-0.0430699	-0.0407657	-0.00937577	0.104252	0.203482	0.243789	0.232347	0.150526
0.244416	0.122204	-0.0662061	-0.262718	-0.406731	-0.482935	-0.535753	-0.60087	-0.617565	-0.614403	-0.588704	-0.568905	-0.57654	-0.533524	-0.438662	-0.312376	-0.16576	-0.0667364	-0.0321321	-0.1057	-0.255377	-0.408169	-0.483248	-0.423498	-0.344938	-0.292018	-0.260271	-0.240006	-0.210471	-0.158199	-0.0524476	0.0364525	0.0870988	0.0527574	-0.077594	-0.291602	-0.518635	-0.629023	-0.550772	-0.296912	0.0261386	0.323013	0.499475	0.506277	0.34825	0.188579	0.0901184	0.137748	0.23663	0.305498
0.153779	0.216911	0.175105	-0.00604596	-0.296172	-0.543867	-0.700727	-0.612139	-0.481978	-0.332452	-0.266587	-0.231157	-0.169679	-0.0594873	0.133388	0.363735	0.641866	0.82367	0.949662	1.02079	1.03864	0.973959	0.810782	0.557079	0.318462	0.0812125	0.00976487	0.114193	0.325138	0.508074	0.587073	0.482292	0.309911	0.103119	-0.0612647	-0.118521	-0.164899	-0.16712	-0.150539	-0.219286	-0.36822	-0.553707	-0.68502	-0.707155	-0.664843	-0.608963	-0.584311	-0.610538	-0.585386	-0.528178
0.728994	0.388392	0.15409	-0.0390919	-0.0623854	0.0811938	0.284918	0.438097	0.502633	0.492537	0.482669	0.474634	0.461411	0.468786	0.426094	0.365549	0.237808	0.111573	0.0347234	0.0910866	0.27842	0.5797	0.83799	0.96227	0.94847	0.848666	0.745493	0.667572	0.58271	0.497912	0.361154	0.189027	0.0351411	-0.094507	-0.2164	-0.293741	-0.288875	-0.234343	-0.136407	-0.000204451	0.0564952	0.00333681	-0.108086	-0.162587	-0.0436233	0.166513	0.363117	0.430394	0.424073	0.304913
0.251211	0.247913	0.270957	0.293503	0.405859	0.444669	0.400947	0.285152	0.188921	0.0957874	0.0246908	-0.0623906	-0.0977595	-0.0221048	0.213395	0.611771	0.976873	1.20025	1.18431	0.952593	0.590477	0.276613	0.159304	0.256621	0.43855	0.606988	0.688403	0.590089	0.445614	0.362267	0.386989	0.438296	0.477593	0.398774	0.27302	0.0236024	-0.248458	-0.446299	-0.486388	-0.423819	-0.378616	-0.389742	-0.485929	-0.552649	-0.522463	-0.436337	-0.368244	-0.31428	-0.229507	-0.0902588
-0.15056	-0.0934498	-0.0954675	-0.137194	-0.209881	-0.30806	-0.41199	-0.499289	-0.535735	-0.420509	-0.257406	-0.0795347	0.0543812	0.0439128	-0.0786725	-0.128936	-0.0261663	0.188847	0.408595	0.525407	0.520855	0.460416	0.385608	0.41413	0.508647	0.595937	0.600659	0.496179	0.302714	0.132364	0.106317	0.172912	0.275809	0.335551	0.308264	0.187537	0.0753518	-0.0384232	-0.134729	-0.226722	-0.285698	-0.329298	-0.373018	-0.403989	-0.424956	-0.406938	-0.420907	-0.479096	-0.58428	-0.645006
-0.0822054	-0.259449	-0.361187	-0.359424	-0.252855	-0.106574	-0.0754234	-0.119672	-0.227484	-0.330294	-0.280777	-0.0936421	0.116622	0.254825	0.332191	0.393092	0.490145	0.533767	0.573546	0.572403	0.501325	0.482574	0.48474	0.429894	0.334085	0.18273	0.125748	0.123254	0.126474	0.104772	-0.00101617	-0.17832	-0.307658	-0.362821	-0.288777	-0.150204	-0.0316881	0.057443	0.0584823	-0.0742777	-0.269953	-0.473437	-0.694722	-0.811085	-0.838071	-0.754705	-0.577035	-0.372249	-0.25276	-0.196574
-0.210818	-0.0229953	0.188797	0.372278	0.489538	0.486516	0.402518	0.261081	0.0902005	-0.0959733	-0.243588	-0.335556	-0.389494	-0.404245	-0.380193	-0.304276	-0.229156	-0.129382	-0.106581	-0.165962	-0.291545	-0.438553	-0.55896	-0.651093	-0.695308	-0.796528	-0.964627	-1.13158	-1.226	-1.25583	-1.17643	-0.982696	-0.693699	-0.431996	-0.299593	-0.294345	-0.439257	-0.620823	-0.755475	-0.818931	-0.85561	-0.898427	-0.93331	-0.923032	-0.946421	-0.995062	-1.05549	-1.11101	-1.12323	-1.06586
0.843729	0.796106	0.752843	0.682119	0.555425	0.446384	0.351391	0.241884	0.156893	0.108861	0.0850244	0.0896268	0.183675	0.326171	0.407035	0.369634	0.207084	-0.0156798	-0.180463	-0.275225	-0.321089	-0.350402	-0.340818	-0.303152	-0.230855	-0.11751	-0.0109256	0.120392	0.267104	0.390804	0.464623	0.394771	0.203646	-0.00959942	-0.186625	-0.308507	-0.349467	-0.383425	-0.400933	-0.417234	-0.427081	-0.385362	-0.262885	-0.0298868	0.152134	0.192852	0.0786287	-0.0776991	-0.164823	-0.151122
-0.67978	-0.468181	-0.240919	-0.00661166	0.109708	0.120809	0.0568775	-0.0392759	-0.120437	-0.10368	0.0133522	0.224277	0.348316	0.358377	0.272206	0.0824034	-0.128395	-0.338949	-0.485615	-0.519511	-0.471301	-0.335647	-0.107195	0.144669	0.318385	0.323239	0.134182	-0.188641	-0.518824	-0.690922	-0.583269	-0.238523	0.179454	0.483905	0.535632	0.407755	0.253759	0.166525	0.134264	0.177535	0.175799	0.1522	0.0610969	-0.0502277	-0.107017	-0.138786	-0.131649	-0.0771763	-0.0190135	-0.0135543
1.29285	1.03318	0.787898	0.539924	0.384577	0.352363	0.456319	0.561012	0.533254	0.349783	0.0959988	-0.065158	-0.065417	0.12658	0.35634	0.499128	0.451981	0.255956	0.0263105	-0.1282	-0.105323	0.034307	0.192688	0.309222	0.382183	0.366158	0.37424	0.388332	0.461483	0.49866	0.447324	0.358397	0.254629	0.152693	0.0521097	-0.0133992	-0.043169	0.00559592	0.0943393	0.26201	0.443152	0.586806	0.654297	0.615168	0.521098	0.464935	0.488012	0.509873	0.495265	0.381479
-0.218709	-0.219496	-0.304496	-0.404579	-0.524512	-0.600808	-0.615978	-0.599206	-0.539438	-0.499058	-0.519305	-0.535152	-0.523679	-0.45695	-0.388095	-0.379172	-0.423557	-0.439087	-0.393218	-0.341591	-0.313804	-0.295643	-0.284076	-0.160253	0.0416244	0.279811	0.450108	0.469697	0.312443	0.0315014	-0.299059	-0.5631	-0.659955	-0.633165	-0.543488	-0.526566	-0.51904	-0.460361	-0.334369	-0.203267	-0.0958361	-0.0990523	-0.242484	-0.501611	-0.797978	-1.01986	-1.12978	-1.05214	-0.808855	-0.408602
1.0781	1.10262	1.13416	1.12217	1.10298	1.0889	1.09976	1.10236	1.04341	0.937288	0.749491	0.507598	0.323986	0.252747	0.32126	0.465809	0.603015	0.689157	0.712302	0.726018	0.751722	0.83823	0.952705	1.03025	1.04448	0.978392	0.896709	0.766131	0.581693	0.315959	0.111754	-0.0249017	-0.0763485	-0.0823451	-0.121355	-0.165448	-0.257585	-0.369629	-0.455866	-0.456538	-0.428118	-0.303319	-0.185174	-0.154863	-0.273139	-0.430881	-0.491582	-0.372258	-0.102978	0.231829
0.338022	0.248723	0.212997	0.166055	0.172004	0.200295	0.213627	0.142809	0.0413344	-0.0736141	-0.133209	-0.0759039	0.0478321	0.211375	0.350435	0.386376	0.375027	0.351808	0.334508	0.287241	0.187341	0.0686291	-0.0349144	-0.0662402	0.0163079	0.164166	0.321657	0.41404	0.359737	0.252191	0.182166	0.226573	0.339133	0.487172	0.548461	0.47744	0.265447	-0.0180787	-0.266812	-0.436665	-0.482022	-0.41946	-0.359147	-0.35517	-0.464901	-0.618499	-0.667159	-0.539423	-0.268891	0.0263988
0.0248612	0.0741497	0.116067	0.152327	0.171411	0.106612	0.0227702	-0.0596896	-0.0552421	0.0488108	0.185024	0.336822	0.430543	0.468913	0.526047	0.631745	0.747958	0.85465	0.870044	0.777058	0.537376	0.237122	-0.124834	-0.445548	-0.693747	-0.804051	-0.811987	-0.778131	-0.644277	-0.431523	-0.160614	0.0647601	0.240803	0.358478	0.460763	0.577676	0.690757	0.811609	0.875061	0.884159	0.81202	0.745829	0.651861	0.505205	0.324774	0.108766	-0.107335	-0.242203	-0.305859	-0.318521
-0.469442	-0.386986	-0.384402	-0.406465	-0.432938	-0.422232	-0.345835	-0.237873	-0.141855	-0.0305968	0.0651825	0.113865	0.128589	0.0783528	0.0369123	0.0935128	0.27773	0.453212	0.462247	0.266892	0.00181944	-0.195058	-0.245702	-0.169805	-0.0341461	0.063534	0.115404	0.0828532	0.0810859	0.124028	0.244546	0.424307	0.554708	0.540776	0.359732	0.165078	0.0399594	0.0515052	0.166179	0.314433	0.417364	0.391576	0.291362	0.132077	-0.0217553	-0.121017	-0.187866	-0.198092	-0.154277	-0.0578101
-0.854333	-0.643343	-0.384358	-0.129584	0.0245376	0.0384705	-0.0334869	-0.181932	-0.323981	-0.435482	-0.575775	-0.678484	-0.70225	-0.661145	-0.574504	-0.551497	-0.616931	-0.738149	-0.815494	-0.794568	-0.719333	-0.689151	-0.723564	-0.793489	-0.81067	-0.736594	-0.639699	-0.550521	-0.480059	-0.421556	-0.362819	-0.24624	-0.140555	-0.101723	-0.177702	-0.335695	-0.574155	-0.894315	-1.10919	-1.12486	-0.928804	-0.645994	-0.377357	-0.264668	-0.348085	-0.54592	-0.772909	-0.85967	-0.888339	-0.84297
[truncated: 4 more rows]
[truncated: 91 more columns]

## Sheet: Figure 5C
C. Air lever press bouts
Vehicle	SR141716
3.733	-3.386
-2.035	0.5784
1.138	1.81
0.4431	0.3794
2.163	0.289
-2.77	-0.2911
1.1	-0.475
[truncated: 432 more rows]

## Sheet: Figure 5D
D. Vehicle
[truncated: 15 more rows]
[truncated: 91 more columns]

[truncated: 16 more sheets: Figure 5E, Figure 5F-Veh, Figure 5F-SR, Figure 5G, Figure 5H, Figure 5I, Figure 5J-Veh, Figure 5J-SR, Figure 5K, Figure 5L, Figure 5M, Figure 5N-Veh, Figure 5N-SR, Figure 5O, Figure 5P, Figure 5Q]
