# Supplementary material for: Mechanism for differential recruitment of orbitostriatal transmission during actions and outcomes following chronic alcohol exposure
Source: eLife. 2021 Mar 17;10:e67065. doi: 10.7554/eLife.67065 (PMC8016477; doi:10.7554/eLife.67065)
Supplement: Figure 6—figure supplement 1—source data 1. [file elife-67065-fig6-figsupp1-data1.xlsx]

## Sheet: Sheet1
	B. Air Veh									B. Air SR											B. CIE Veh										B. CIE SR
	5	6	5	5	5	5	5			3	5	5	6	2	5	5	5				5	5	5	5	2	4	6	5			5	5	8	5	5	5	5	5	2
	7	15	15	5	15	15	17			15	15	9	16	4	8	15	17				17	15	15	1	2	12	17	1			15	15	11	2	15	15	15	15	16
	16	30	24	20	30	30	30			30	30	18	30	20	31	30	31				30	30	30	4	0	32	30	24			30	30	31	4	30	30	31	30	30
	118	164	264	93	276	218	360			246	287	16	263	156	331	361	284				137	100	59	17	6	270	319	270			151	347	327	56	133	325	280	386	261
	184	108	273	150	337	267	253			348	356	28	260	235	212	285	203				314	211	91	116	5	267	358	273			287	316	273	229	201	290	309	311	429
	222	239	418	284	585	620	652			461	394	91	787	261	515	641	810				322	363	138	426	14	587	842	659			366	499	405	468	485	537	486	489	626
	327	356	539	452	571	623	746			751	438	94	892	378	449	511	480				346	639	192	691	20	577	532	592			587	549	542	568	319	613	458	618	640
	422	524	419	604	538	648	507			749	798	108	534	445	677	693	631				435	483	252	665	25	489	566	808			539	779	447	533	356	698	680	654	581
	539	420	428	374	470	722	550			753	595	393	654	466	513	643	780				465	593	242	454	205	506	561	512			692	643	552	657	483	388	596	709	393
	C. Air Veh									C. Air SR											C. CIE Veh										C. CIE SR
	1.65746	0.16682	0.30581	0.12664	0.34169	0.26178	0.35885			0.03333	0.11853	0.1233	0.34417	0.03333	0.26201	0.29499	0.7371				0.34522	1.21951	0.59524	0.34722	0.03333	0.06667	1.23711	0.2095			0.0674	0.26954	2.35294	0.36058	0.11641	0.21231	0.25707	2.75229	0.03333
	0.116667	0.567465	0.382653	0.083333	1.18265	0.306748	2.54364			0.177901	2.71084	0.15	0.959041	0.066667	0.133333	0.969828	0.978887				0.748899	0.555556	0.551133	0.016667	0.033333	0.2	0.659341	0.016667			0.468019	0.955414	0.183333	0.033333	0.260492	0.681302	0.304363	1.14796	0.63745
	0.266667	0.75	0.4	0.333333	3.19149	1.65289	3.73444			1.16959	3.1746	0.3	1.07591	0.333333	1.43077	3.81356	1.58433				1.14577	1.02389	0.926879	0.0666667	0	1.49883	1.77165	0.4			0.764331	1.08827	0.738095	0.0666667	1.09025	2.46238	1.17573	1.94385	2.33766
	1.9667	2.7333	4.4	1.55	9.7354	5.8393	9.9585			4.1	11.619	0.2667	6.758	2.6	7.2774	11.317	9.9707				2.2833	1.6667	0.9833	0.2833	0.1	4.5	11.866	5.2241			2.5167	5.8598	5.45	0.9333	2.2167	10.541	6.3878	19.594	8.1861
	3.0667	1.8	4.55	2.5	10.704	6.4003	5.5994			9.7661	17.184	0.4667	9.0069	3.9167	5.0778	11.206	6.259				6.5553	3.5167	1.5167	1.9333	0.0833	4.45	8.6928	4.55			6.1809	8.1689	4.55	3.8167	3.35	8.3573	6.0568	10.287	7.15
	3.7	3.9833	6.9667	4.7333	24.426	11.359	13.872			7.6833	10.22	1.5167	13.117	4.35	9.4843	17.434	19.918				5.3667	6.05	2.3	7.1	0.2333	12.153	23.281	11.768			6.1	9.5502	6.75	7.8	8.0833	17.407	15.9	22.06	15.683
	5.45	5.9333	8.9833	7.5333	19.118	10.383	14.532			12.517	18.546	1.5667	15.401	6.3	8.112	15	12.743				5.7667	10.65	3.2	11.517	0.3333	9.6167	14.372	11.034			10.179	12.635	12.244	13.837	5.3167	14.543	11.517	20.207	12.964
	7.03333	8.73333	6.98333	10.0667	24	15.7536	28.9714			13.3472	21.3464	1.8	13.4059	7.41667	11.5071	17.2818	19.1793				7.25	8.99162	4.2	13.5208	0.41667	10.3748	18.7936	13.5042			12.1169	15.1213	11.0008	15.3014	5.93333	17.1639	18.3701	23.9268	11.8531
	9.74096	7	7.13333	6.23333	23.0392	16.7323	22.0884			12.6519	13.5176	6.55	15.829	7.76667	13.7288	14.7027	18.1748				8.31099	11.2346	4.03333	14.2917	3.41667	8.43333	16.9061	9.63916			16.3208	16.0416	13.7599	19.5827	8.05	14.3704	13.22	26.9582	6.63105
	D. Air Veh									D. Air SR											D. CIE Veh										D. CIE SR
	5	6	5	5	5	5	5			3	5	5	6	2	5	5	5				5	5	5	5	2	4	6	5			5	5	7	5	5	5	5	5	2
	7	15	5	15	15	17	15			15	15	9	16	4	8	15	17				17	15	15	1	2	12	17	1			15	15	11	2	15	15	15	15	16
	16	30	20	30	30	30	24			30	30	18	30	20	31	30	30				30	30	30	4	0	32	30	24			30	30	31	4	30	30	31	30	30
	9	14	11	30	30	30	25			23	30	0	30	15	30	30	30				14	11	3	0	1	21	30	30			19	30	24	5	11	30	30	30	30
	15	14	20	30	30	30	25			30	30	4	30	21	30	30	30				30	27	13	11	1	23	30	22			30	30	27	23	21	30	30	30	26
	16	12	13	30	30	30	23			25	30	4	45	12	30	30	30				18	18	10	16	1	30	30	30			20	30	17	27	24	30	31	30	30
	21	25	27	30	28	30	28			28	30	2	30	14	30	30	30				19	29	9	29	0	25	30	30			30	30	30	30	19	30	30	30	30
	15	22	24	30	30	30	25			30	30	4	30	26	30	30	30				17	30	15	30	3	30	30	30			30	30	30	30	20	30	30	30	30
	30	27	22	30	30	30	27			30	30	19	30	21	30	30	30				30	30	16	30	7	24	30	30			30	30	30	30	26	30	30	30	30
	E. Air Veh									E. Air SR											E. CIE Veh										E. CIE SR
	7	340	56	164	146	168	199			623	647	59	116	354	50	62	26				77	36	24	117	186	163	74	348			373	121	5	8	163	148	66	5	25
	477	233	373	402	182	373	45			512	56	196	137	294	123	103	121				129	302	75	572	156	156	176	29			267	184	485	712	248	273	173	103	101
	361	129	405	267	122	212	69			94	118	233	127	440	100	113	135				120	231	87	199	213	107	150	402			377	139	275	333	106	223	275	143	75
	253	351	539	218	401	253	277			270	241	299	444	279	152	488	248				221	454	319	429	145	219	469	595			486	234	414	310	580	493	493	279	347
	277	200	426	137	278	180	208			155	147	533	195	298	126	214	146				158	529	225	371	186	189	553	209			456	191	326	303	298	282	419	365	280
	201	368	360	334	203	205	175			158	203	279	223	177	139	246	356				143	429	122	304	136	197	246	424			342	141	462	478	203	189	305	164	209
	174	168	292	224	203	251	195			109	134	364	230	287	119	175	257				115	369	130	194	129	83	109	218			319	115	224	323	112	153	200	199	230
	186	234	129	153	164	277	79			123	141	440	90	189	113	153	175				104	172	61	134	135	75	102	405			218	152	201	226	88	197	178	178	127
	168	207	114	79	166	241	147			135	166	176	99	159	115	174	253				125	262	89	104	345	196	168	269			269	115	132	205	123	148	165	116	185
	F.			G.			H.			I.					J. Air Veh									J. Air SR										J. CIE Veh										J. CIE SR
	Air	CIE		Air	CIE		Air	CIE		Air	CIE			sucrose	0.07	0.28	0.31	0.28	0.14	0.35	0.43			0.41	0.18	0.11	0.49	0.33	0.13	0.54	0.2			0.54	0.21	0.36	0.44	0.14	0.27	0.25	0.48			0.33	0.22	0.36	0.2	0.28	0.64
	49	39		4	5		0.103333	0.4325		0.31	1.73			pellets	0.11	0.34	0.18	0.35	0.22	0.56	0.35			0.63	0.33	0.21	0.41	0.11	0.35	0.29	0.05			0.23	0.31	0.23	0.12	0.51	0.56	0.54	0.31			0.18	0.16	0.24	0.31	0.28	0.27
	44	40		3	7		0.25	0.315		0.5	1.89
	30	61		10	4		0.121111	0.586667		1.09	1.76
	24	37		10	4		0.155556	0.673333		1.4	2.02				K. Air Veh									K. Air SR										K. CIE Veh										K. CIE SR
	11	1		3	17		0.15	0.37375		0.3	5.98			Valued	61	42	60	45	169	96	196			123	238	13	38	23	76	159	111			41	83	33	80	20	57	68	64			146	174	92	45	92	122
	25	33		7	3		0.121667	0.14		0.73	0.28			Devalued	47	39	39	15	84	19	90			10	43	13	36	20	56	126	38			38	63	38	87	16	53	101	55			9	76	51	68	54	29
	24	14		12	8		0.121818	0.285714		1.34	2
	80	39		10	4		0.103333	0.646667		0.93	1.94
	37	57		6	3		0.124	0.18		0.62	0.36
	91	50		5	5		0.0975	0.41		0.39	1.64
	84	63		12	4		0.086364	0.286667		0.95	0.86
	55	96		7	4		0.135	0.156667		0.81	0.47
	82	59		8	3		0.121429	0.665		0.85	1.33
	100	49		8	11		0.162857	0.234		1.14	2.34
	70	60		7	4		0.058333	0.3		0.35	0.9
	76	68		4	10		0.11	0.272222		0.33	2.45
	48	72		10	3		0.112222	0.145		1.01	0.29
	43	49		15	5		0.176429	0.1875		2.47	0.75
	39	58		10	5		0.176667	0.21		1.59	0.84
	13	85		3	10		0.39	0.16		0.78	1.44
	29	62		14	3		0.151538	0.38		1.97	0.76
	34	3		8	3		0.141429	0.24		0.99	0.48
	86	31		14	4		0.096154	0.136667		1.25	0.41
	48	27		4	5		0.113333	0.36		0.34	1.44
	70	56		7	21		0.146667	0.1405		0.88	2.81
	71	69		10	3		0.123333	0.51		1.11	1.02
	53	81		7	7		0.081667	0.413333		0.49	2.48
	48	85		21	7		0.1685	0.545		3.37	3.27
	37	55		13	5		0.09	0.05		1.08	0.2
	77	67		21	8		0.1965	0.225714		3.93	1.58
	69	64		5	6		0.1325	0.294		0.53	1.47
	70	62		16	3		0.112667	0.495		1.69	0.99
	36	61		9	16		0.17625	0.179333		1.41	2.69
	39	53		3	10		0.04	0.158889		0.08	1.43
	12	59		28	8		0.155185	0.354286		4.19	2.48
	29	54		4	14		0.083333	0.168462		0.25	2.19
	41	106		14	8		0.187692	0.328571		2.44	2.3
	50	56		7	6		0.1	0.194		0.6	0.97
	41	3		16	3		0.148667	0.705		2.23	1.41
	66	28		16	5		0.134667	0.1975		2.02	0.79
	86	33		15	3		0.142143	0.27		1.99	0.54
	81	53		3	11		0.135	0.161		0.27	1.61
	88	65		7	9		0.133333	0.16375		0.8	1.31
	74	75		3	15		0.075	0.147857		0.15	2.07
	61	75		12	17		0.095455	0.20875		1.05	3.34
	64	61		7	19		0.136667	0.128889		0.82	2.32
	50	87		3	10		0.16	0.157778		0.32	1.42
	48	48		3	5		0.245	0.3325		0.49	1.33
	35	51		3	3		0.075	0.505		0.15	1.01
	42	89		4	3		0.163333	0.115		0.49	0.23
	48	79		3	3		0.085	0.395		0.17	0.79
	48	64		8	4		0.245714	0.253333		1.72	0.76
	61	63		3	4		0.11	0.333333		0.22	1
	47	86		7	6		0.215	0.492		1.29	2.46
	57	65		5	7		0.2225	0.258333		0.89	1.55
	90	25		4	7		0.353333	0.32		1.06	1.92
	58	41		4	8		0.4	0.242857		1.2	1.7
	66	25		3	10		0.105	0.143333		0.21	1.29
	88	60		9	10		0.24875	0.387778		1.99	3.49
	52	84		4	14		0.073333	0.233077		0.22	3.03
		52		3	7		0.205	0.268333		0.41	1.61
		59		6	3		0.244	0.245		1.22	0.49
		62		14	3		0.240769	0.33		3.13	0.66
		50		4	10		0.26	0.361111		0.78	3.25
		33		4	6		0.19	0.292		0.57	1.46
		64		4	9		0.26	0.31		0.78	2.48
		43		4	9		0.226667	0.29625		0.68	2.37
		73		8	19		0.302857	0.163889		2.12	2.95
				10	3		0.205556	0.475		1.85	0.95
				15	12		0.18	0.254545		2.52	2.8
				5	18		0.235	0.218235		0.94	3.71
				4	9		0.35	0.19625		1.05	1.57
				7	6		0.191667	0.136		1.15	0.68
				26	3		0.236	0.6		5.9	1.2
				3	14		0.145	0.288462		0.29	3.75
				4	3		0.32	0.18		0.96	0.36
				5	3		0.215	0.145		0.86	0.29
				29	14		0.187143	0.203077		5.24	2.64
				10	3		0.126667	0.655		1.14	1.31
				4	3		0.153333	0.16		0.46	0.32
				22	3		0.197619	0.14		4.15	0.28
				17	3		0.196875	0.085		3.15	0.17
				4	3		0.173333	0.15		0.52	0.3
				3	4		0.46	0.09		0.92	0.27
				5	4		0.115	0.06		0.46	0.18
				5	4		0.1575	0.283333		0.63	0.85
				6	4		0.222	0.34		1.11	1.02
				4	9		0.18	0.245		0.54	1.96
				10	3		0.258889	0.12		2.33	0.24
				3	3		0.25	0.36		0.5	0.72
				17	3		0.1775	0.01		2.84	0.02
				9	9		0.27375	0.2225		2.19	1.78
				18	13		0.192353	0.186667		3.27	2.24
				4	3		2.46333	0.21		7.39	0.42
				6	4		3.406	0.186667		17.03	0.56
				3	13		7.865	0.14		15.73	1.68
				6	10		3.968	0.17		19.84	1.53
				14	25		3.26615	0.148333		42.46	3.56
				10	10		5.70889	0.084444		51.38	0.76
				7	4		3.97333	0.123333		23.84	0.37
				12	3		2.84545	0.185		31.3	0.37
				9	4		3.275	0.223333		26.2	0.67
				3	4		8.17	0.116667		16.34	0.35
				6	7		2.328	0.256667		11.64	1.54
				7	6		5.64667	0.298		33.88	1.49
				9	5		3.30125	0.1475		26.41	0.59
				13	3		3.66667	0.325		44	0.65
				10	3		3.49889	0.36		31.49	0.72
				8	13		4.64143	0.109167		32.49	1.31
				4	3		2.57333	0.065		7.72	0.13
				18	18		2.58588	0.173529		43.96	2.95
				13	3		3.5325	0.08		42.39	0.16
				7	7		2.36	0.16		14.16	0.96
				9	3		3.43125	0.11		27.45	0.22
				3	30		3.505	0.109655		7.01	3.18
				3	3		0.725	0.045		1.45	0.09
				10	4		3.49444	0.203333		31.45	0.61
				12	9		2.84727	0.21125		31.32	1.69
				8	4		5.65286	0.083333		39.57	0.25
				4	10		4.09	0.133333		12.27	1.2
				7	14		4.70833	0.130769		28.25	1.7
				6	4		1.884	0.24		9.42	0.72
				6	5		4.502	0.155		22.51	0.62
				7	5		2.315	0.2325		13.89	0.93
				5	5		3.46	0.175		13.84	0.7
				14	10		3.83	0.218889		49.79	1.97
				21	3		3.208	0.105		64.16	0.21
				5	4		2.215	0.056667		8.86	0.17
				17	5		3.04375	0.0625		48.7	0.25
				9	3		2.22625	0.095		17.81	0.19
				17	5		3.16063	0.19		50.57	0.76
				6	5		4.688	0.1925		23.44	0.77
				14	4		2.55692	0.106667		33.24	0.32
				4	7		1.49667	0.22		4.49	1.32
				9	7		4.74875	0.141667		37.99	0.85
				9	3		2.89875	0.23		23.19	0.46
				3	3		2.46	0.285		4.92	0.57
				35	4		2.91941	0.103333		99.26	0.31
				3	5		3.94	0.265		7.88	1.06
				8	4		5.14857	0.253333		36.04	0.76
				14	3		3.01154	0.24		39.15	0.48
				5	10		5.96	0.225556		23.84	2.03
				7	5		4.36667	0.1725		26.2	0.69
				18	9		2.66	0.18375		45.22	1.47
				10	7		1.98667	0.3		17.88	1.8
				4	3		1.05667	0.255		3.17	0.51
				11	12		3.437	0.192727		34.37	2.12
				3	9		9.335	0.2075		18.67	1.66
				5	6		10.5025	0.184		42.01	0.92
				4	5		4.64667	0.2575		13.94	1.03
				15	3		7.65786	0.025		107.21	0.05
				3	6		6.665	0.212		13.33	1.06
				6	4		2.022	0.3		10.11	0.9
				6	5		6.056	0.2175		30.28	0.87
				4	5		0.483333	0.2125		1.45	0.85
				3	6		12.33	0.216		24.66	1.08
				19	10		7.07444	0.238889		127.34	2.15
				5	13		11.06	0.175		44.24	2.1
				4	3		7.03667	0.48		21.11	0.96
				9	3		3.71875	0.355		29.75	0.71
				3	3		2.99	0.35		5.98	0.7
				7	9		2.81667	0.315		16.9	2.52
				3	6		1.555	0.49		3.11	2.45
				4	14		3.25	0.335385		9.75	4.36
				3	14		4.075	0.186923		8.15	2.43
				17	23		3.74875	0.218182		59.98	4.8
				8	13		3.95857	0.269167		27.71	3.23
				5	16		2.2975	0.2		9.19	3
				6	13		3.114	0.1725		15.57	2.07
				3	20		3.21	0.176842		6.42	3.36
				5	14		6.9375	0.214615		27.75	2.79
				12	4		4.24636	0.33		46.71	0.99
				7	10		4.48833	0.284444		26.93	2.56
				6	3		2.96	0.175		14.8	0.35
				4	6		4.47333	0.16		13.42	0.8
				4	11		3.44	0.393		10.32	3.93
				10	10		3.89	0.236667		35.01	2.13
				9	4		6.86	63.55		54.88	190.65
				20	13		2.56684	2.12		48.77	25.44
				6	5		3.596	3.0775		17.98	12.31
				9	20		1.34875	2.1079		10.79	40.05
				10	16		2.00111	3.188		18.01	47.82
				5	10		4.575	2.68556		18.3	24.17
				3	6		8.035	3.406		16.07	17.03
				5	4		1.91	2.84		7.64	8.52
				3	31		4.985	2.85867		9.97	85.76
				3	11		4.14	3.028		8.28	30.28
				3	14		7.975	2.11077		15.95	27.44
				15	8		2.86071	2.94714		40.05	20.63
				7	25		2.63	2.08208		15.78	49.97
				12	4		4.28364	1.85333		47.12	5.56
				7	14		2.32333	2.37692		13.94	30.9
				19	19		3.02944	2.69389		54.53	48.49
				6	3		2.986	2.51		14.93	5.02
				6	4		2.628	1.10667		13.14	3.32
				3	3		6.02	3.955		12.04	7.91
				5	30		2.3825	1.68724		9.53	48.93
				13	27		1.93833	2.94808		23.26	76.65
				5	4		1.6875	1.24333		6.75	3.73
				3	28		0.905	1.95444		1.81	52.77
				8	14		4.56857	2.56077		31.98	33.29
				25	4		2.36042	2.26667		56.65	6.8
				13	20		3.06667	1.71842		36.8	32.65
				12	8		4.02091	2.06714		44.23	14.47
				11	4		2.163	2.77667		21.63	8.33
				16	5		2.12333	3.415		31.85	13.66
				3	3		1.03	3		2.06	6
				10	40		1.58222	1.7141		14.24	66.85
				3	30		1.725	2.22517		3.45	64.53
				5	5		2.91	1.795		11.64	7.18
				13	22		1.83167	2.15714		21.98	45.3
				7	8		1.845	11.75		11.07	82.25
				3	4		0.47	11.8		0.94	35.4
				4	11		0.493333	5.564		1.48	55.64
				6	7		2.03	9.39		10.15	56.34
				16	8		1.034	6.80714		15.51	47.65
				3	6		0.555	10.358		1.11	51.79
				15	16		1.04857	6.66133		14.68	99.92
				20	16		1.08737	6.51667		20.66	97.75
				14	8		1.14539	8.17857		14.89	57.25
				8	3		1.42571	13.185		9.98	26.37
				5	5		1.3275	5.655		5.31	22.62
				8	8		1.00429	9.21857		7.03	64.53
				20	14		1.17474	3.38077		22.32	43.95
				5	8		1.775	6.12286		7.1	42.86
				19	3		1.11	0.705		19.98	1.41
				5	5		1.415	1.3975		5.66	5.59
				3	7		1.62	1.10333		3.24	6.62
				7	3		0.98	1.35		5.88	2.7
				15	3		1.52429	4.03		21.34	8.06
				4	5		0.73	0.8175		2.19	3.27
				3	5		0.82	3.8225		1.64	15.29
				16	7		1.24733	3.45		18.71	20.7
				11	6		1.84	2.372		18.4	11.86
				18	38		1.62059	2.00514		27.55	74.19
				19	4		1.42556	0.686667		25.66	2.06
				8	4		1.74857	0.75		12.24	2.25
				5	5		2.0275	1.605		8.11	6.42
				4	3		2.83667	1.005		8.51	2.01
				3	21		1.255	0.797		2.51	15.94
				8	9		1.78571	2.04625		12.5	16.37
				18	6		1.31765	1.88		22.4	9.4
				7	4		1.35333	1.96667		8.12	5.9
				4	4		1.52333	2.38667		4.57	7.16
				18	17		1.22823	2.12438		20.88	33.99
				11	6		1.764	2.32		17.64	11.6
				28	11		1.34963	1.559		36.44	15.59
				4	3		0.866667	0.395		2.6	0.79
				5	5		1.3275	3.3475		5.31	13.39
				9	14		1.1	2.21923		8.8	28.85
				6	10		0.838	1.68556		4.19	15.17
				6	6		0.536	1.002		2.68	5.01
				10	3		1.43	2.285		12.87	4.57
				4	3		0.743333	0.565		2.23	1.13
				18	7		1.12588	1.51667		19.14	9.1
				13	3		1.37083	0.84		16.45	1.68
				8	25		0.945714	2.11083		6.62	50.66
				8	16		1.76286	1.53933		12.34	23.09
				16	21		1.53733	2.2705		23.06	45.41
				8	18		1.19714	1.87		8.38	31.79
				15	13		1.28643	2.72083		18.01	32.65
				3	15		1.54	1.45929		3.08	20.43
				5	24		0.9575	1.60435		3.83	36.9
				5	8		1.6425	1.38571		6.57	9.7
				15	3		1.09429	1.815		15.32	3.63
				7	4		1.00333	4.62333		6.02	13.87
				7	4		1.13333	1.44667		6.8	4.34
				15	3		1.02929	2.6		14.41	5.2
				10	4		1.00222	1.74		9.02	5.22
				8	6		1.19286	1.434		8.35	7.17
				5	6		1.7025	0.68		6.81	3.4
				7	4		0.856667	0.663333		5.14	1.99
				14	7		0.917692	0.463333		11.93	2.78
				10	6		1.04444	0.484		9.4	2.42
				5	6		1.0225	0.9		4.09	4.5
				3	3		0.645	1.205		1.29	2.41
				8	3		1.25571	0.97		8.79	1.94
				18	4		1.01118	0.746667		17.19	2.24
				3	3		0.515	0.77		1.03	1.54
				3	11		0.71	1.496		1.42	14.96
				7	13		1.17	2.26		7.02	27.12
				4	11		1.86667	0.729		5.6	7.29
				7	5		1.25667	3.6475		7.54	14.59
				28	3		1.12556	1.915		30.39	3.83
				4	6		0.453333	1.174		1.36	5.87
				5	7		1.055	1.01333		4.22	6.08
				4	7		0.366667	1.45833		1.1	8.75
				8	14		3.13857	1.37692		21.97	17.9
				14	12		2.14692	2.04182		27.91	22.46
				4	6		1.18667	2.39		3.56	11.95
				5	5		2.1	1.165		8.4	4.66
				4	3		2.61	0.83		7.83	1.66
				7	6		1.745	2.654		10.47	13.27
				17	5		2.2125	0.78		35.4	3.12
				17	3		2.5475	0.57		40.76	1.14
				13	5		3.74583	2.575		44.95	10.3
				4	4		3.64333	3.61		10.93	10.83
				5	6		2.7125	1.454		10.85	7.27
				19	10		2.41222	1.28667		43.42	11.58
				5	8		4.675	1.93286		18.7	13.53
				7	3		0.935	1.59		5.61	3.18
				4	6		3.79667	2.95		11.39	14.75
				8	19		3.07429	2.47222		21.52	44.5
				6	16		3.26	1.31533		16.3	19.73
				6	9		2.302	2.12625		11.51	17.01
				10	3		2.81	1.08		25.29	2.16
				5	6		3.55	1.898		14.2	9.49
				48	17		1.88362	2.54937		88.53	40.79
				6	7		1.768	2		8.84	12
				4	15		0.573333	2.00857		1.72	28.12
				22	5		1.80571	1.5675		37.92	6.27
				20	3		2.18684	3.495		41.55	6.99
				17	4		1.76375	3.08		28.22	9.24
				39	29		1.58895	2.00214		60.38	56.06
				7	5		2.18833	1.5075		13.13	6.03
				17	16		1.57688	1.82133		25.23	27.32
				5	9		4.26	1.98375		17.04	15.87
				4	6		3.46667	0.752		10.4	3.76
				3	3		1.64	0.45		3.28	0.9
				4	10		1.9	3.42333		5.7	30.81
				5	5		2.08	1.425		8.32	5.7
				3	3		1.135	5.085		2.27	10.17
				5	3		2.395	1.445		9.58	2.89
				9	4		2.03125	5.53667		16.25	16.61
				3	7		0.625	2.77		1.25	16.62
				4	3		0.84	3.98		2.52	7.96
				7	6		1.37167	2.442		8.23	12.21
				5	6		1.5375	1.99		6.15	9.95
				5	3		1.2125	0.88		4.85	1.76
				13	6		1.36917	1.814		16.43	9.07
				4	3		0.72	2.285		2.16	4.57
				4	3		1.47667	3.755		4.43	7.51
				4	8		1.05333	3.47857		3.16	24.35
				3	3		1.495	1.105		2.99	2.21
				8	25		1.02857	2.55833		7.2	61.4
				3	11		0.905	2.598		1.81	25.98
				8	6		1.28286	1.264		8.98	6.32
				3	4		1.3	6.80333		2.6	20.41
				4	13		0.706667	2.53833		2.12	30.46
				3	5		1.615	3.0375		3.23	12.15
				4	4		1.40333	4.27333		4.21	12.82
				4	4		0.713333	2.94333		2.14	8.83
				6	3		1.062	4.57		5.31	9.14
				3	3		0.88	1.85		1.76	3.7
				3	9		1.445	2.2875		2.89	18.3
				8	3		1.44714	5.82		10.13	11.64
				3	11		0.705	3.685		1.41	36.85
				3	12		0.965	2.64909		1.93	29.14
				3	3		1.04	2.04		2.08	4.08
				6	10		1.192	2.24556		5.96	20.21
				13	10		1.31417	3.67778		15.77	33.1
				5	9		1.695	2.6475		6.78	21.18
				4	4		1.14	3		3.42	9
				5	4		1.62	2.48333		6.48	7.45
				3	13		0.77	3.78917		1.54	45.47
				3	13		1.195	2.43083		2.39	29.17
				3	14		1.44	2.90077		2.88	37.71
				7	8		0.786667	2.29429		4.72	16.06
				6	8		1.212	2.73857		6.06	19.17
				4	7		1.18	1.63		3.54	9.78
				7	3		0.981667	5.37		5.89	10.74
				3	6		1.35	4.142		2.7	20.71
				9	20		1.25625	3.38263		10.05	64.27
				10	4		1.13667	2.08		10.23	6.24
				3	3		1.725	1.35		3.45	2.7
				3	3		0.74	3.085		1.48	6.17
				3	12		1.28	2.99182		2.56	32.91
				4	3		1.03667	2.04		3.11	4.08
				3	12		1.835	2.35273		3.67	25.88
				3	4		0.94	0.803333		1.88	2.41
				4	3		1.35333	1.9		4.06	3.8
				7	4		1.13333	1.18667		6.8	3.56
				6	3		1.018	0.35		5.09	0.7
				6	3		0.592	0.83		2.96	1.66
				6	6		1.178	1.74		5.89	8.7
				9	4		1.135	0.93		9.08	2.79
				8	6		1.09143	0.966		7.64	4.83
				7	12		1.82167	0.846364		10.93	9.31
				3	10		2.02	0.896667		4.04	8.07
				4	3		1.13333	1.595		3.4	3.19
				6	7		1.392	1.09833		6.96	6.59
				8	3		1.48857	0.81		10.42	1.62
				6	12		1.342	1.07636		6.71	11.84
				4	3		1.08667	0.355		3.26	0.71
				4	5		1.18333	1.39		3.55	5.56
				5	4		1.03	1.23333		4.12	3.7
				4	9		1.21667	1.5175		3.65	12.14
				4	4		1.14667	1.04333		3.44	3.13
				4	10		1.29667	1.23556		3.89	11.12
				4	5		1.35667	1.4925		4.07	5.97
				3	5		1.595	0.9575		3.19	3.83
				3	7		0.88	1.32		1.76	7.92
				17	3		1.37062	1.285		21.93	2.57
				3	12		0.935	1.07182		1.87	11.79
				3	9		1.395	0.9925		2.79	7.94
				5	12		1.215	0.875455		4.86	9.63
				11	13		1.202	1.03333		12.02	12.4
				4	6		1.15	1.04		3.45	5.2
				8	9		1.33286	1.335		9.33	10.68
				10	3		1.51889	0.17		13.67	0.34
				3	3		1.01	0.5		2.02	1
				13	6		1.39167	1.432		16.7	7.16
				9	6		0.9175	0.968		7.34	4.84
				3	8		1.125	1.07429		2.25	7.52
				3	5		0.855	0.4775		1.71	1.91
				4	3		0.86	0.92		2.58	1.84
				3	5		2.255	0.945		4.51	3.78
				5	3		1.435	0.255		5.74	0.51
				4	4		1.21	0.293333		3.63	0.88
				6	14		1.58	1.09846		7.9	14.28
				3	5		1.015	0.6425		2.03	2.57
				3	3		1.66	0.455		3.32	0.91
				16	13		1.60267	0.9975		24.04	11.97
				11	3		1.117	0.65		11.17	1.3
				6	11		1.274	0.931		6.37	9.31
				6	19		3.154	1.03556		15.77	18.64
				7	7		2.03167	1.47667		12.19	8.86
				4	3		1.87333	1.23		5.62	2.46
				6	3		2.12	0.36		10.6	0.72
				4	8		2.37667	0.692857		7.13	4.85
				5	3		2.105	0.515		8.42	1.03
				6	9		3.256	0.91		16.28	7.28
				7	4		3.175	1.12667		19.05	3.38
				5	9		2.365	1.27625		9.46	10.21
				5	3		3.075	0.51		12.3	1.02
				3	4		2.35	0.95		4.7	2.85
				8	3		2.72714	1.39		19.09	2.78
				4	8		4.93	0.672857		14.79	4.71
				4	10		1.85667	0.986667		5.57	8.88
				5	3		2.1325	1.64		8.53	3.28
				5	4		3.6925	0.983333		14.77	2.95
				3	8		2.38	1.08714		4.76	7.61
				8	15		2.90429	1.09714		20.33	15.36
				12	4		2.98727	0.526667		32.86	1.58
				3	6		1.47	0.838		2.94	4.19
				3	3		1.33	0.67		2.66	1.34
				7	3		2.27333	1.6		13.64	3.2
				6	3		2.768	0.72		13.84	1.44
				3	4		1.975	0.356667		3.95	1.07
				7	9		2.135	0.83625		12.81	6.69
				4	3		2.05667	1.6		6.17	3.2
				4	5		2.19	0.4275		6.57	1.71
				3	4		4.2	1.33333		8.4	4
				4	3		3.60667	0.97		10.82	1.94
				5	4		3.04	0.673333		12.16	2.02
				7	4		2.575	0.546667		15.45	1.64
				5	4		2.2775	1.43		9.11	4.29
				6	4		2.664	1.01333		13.32	3.04
				4	5		3.20667	0.78		9.62	3.12
				11	3		2.432	0.645		24.32	1.29
				3	6		2.79	1.106		5.58	5.53
				5	6		2.8125	1.028		11.25	5.14
				4	16		2.34	0.883333		7.02	13.25
				5	9		2.78	0.79625		11.12	6.37
				3	5		2.465	1.1875		4.93	4.75
				4	4		2.03667	1.42		6.11	4.26
				3	6		4.155	1.022		8.31	5.11
				7	7		2.57167	0.918333		15.43	5.51
				11	5		2.092	0.785		20.92	3.14
				9	5		1.89375	1.0125		15.15	4.05
				9	3		2.53375	0.605		20.27	1.21
				6	20		2.556	0.887895		12.78	16.87
				5	8		2.08	1.19429		8.32	8.36
				10	7		2.39667	0.433333		21.57	2.6
				3	15		2.225	1.08071		4.45	15.13
				14	3		2.21461	0.565		28.79	1.13
				4	18		3.19	1.14529		9.57	19.47
				3	10		3.2	1.38333		6.4	12.45
				5	3		3.0425	0.595		12.17	1.19
				7	6		2.185	1.232		13.11	6.16
				5	10		3.31	0.974444		13.24	8.77
				5	7		3.455	1.115		13.82	6.69
				3	9		2.765	1.075		5.53	8.6
				7	19		2.62167	1.09556		15.73	19.72
				4	4		1.31667	0.676667		3.95	2.03
				17	4		2.4675	0.653333		39.48	1.96
				9	6		1.9425	0.666		15.54	3.33
				8	12		2.74857	1.02		19.24	11.22
				6	9		2.54	0.99375		12.7	7.95
				10	4		2.93444	0.966667		26.41	2.9
				8	10		3.19857	1.15		22.39	10.35
				7	12		2.845	0.920909		17.07	10.13
				10	3		2.42222	0.5		21.8	1
				3	8		1.605	1.44571		3.21	10.12
				3	3		3.04	1.08		6.08	2.16
				11	3		2.737	0.945		27.37	1.89
				5	8		4.005	1.30714		16.02	9.15
				5	4		2.6125	0.65		10.45	1.95
				8	3		2.05286	1.58		14.37	3.16
				3	5		2.7	1.255		5.4	5.02
				7	5		2.12	0.63		12.72	2.52
				6	10		2.036	0.975556		10.18	8.78
				3	15		2.595	1.005		5.19	14.07
				5	16		2.7325	1.168		10.93	17.52
				16	4		2.91333	1.07667		43.7	3.23
				7	8		3.295	0.934286		19.77	6.54
				5	6		4.06	1.178		16.24	5.89
				8	3		2.11857	1.35		14.83	2.7
				12	3		2.52273	1.215		27.75	2.43
				4	13		2.51	0.943333		7.53	11.32
				4	5		2.60333	0.63		7.81	2.52
				4	4		4.35667	0.943333		13.07	2.83
				9	10		2.7925	1.03		22.34	9.27
				8	9		2.49714	0.83375		17.48	6.67
				4	6		1.92	1.364		5.76	6.82
				3	8		2.78	1.74286		5.56	12.2
				6	3		3.416	0.76		17.08	1.52
				4	7		1.66667	1.31333		5	7.88
				3	3		4.15	1.6		8.3	3.2
				4	8		1.86333	1.51857		5.59	10.63
				6	13		2.864	1.20083		14.32	14.41
				3	5		3.635	1.34		7.27	5.36
				5	5		1.6125	1.44		6.45	5.76
				3	3		3.325	1.285		6.65	2.57
				4	4		3.96667	1.79333		11.9	5.38
				12	4		2.03545	0.846667		22.39	2.54
				14	13		2.62154	1.1175		34.08	13.41
				6	3		2.228	0.71		11.14	1.42
				17	16		2.33562	1.04067		37.37	15.61
				4	6		1.61667	1.158		4.85	5.79
				9	13		1.86625	0.789167		14.93	9.47
				5	4		2.8625	1.06		11.45	3.18
				3	10		4.945	1.52667		9.89	13.74
				4	29		3.38667	1.16036		10.16	32.49
				19	4		2.06278	0.783333		37.13	2.35
				4	13		3.65667	1.245		10.97	14.94
				3	9		3.31	1.33		6.62	10.64
				3	10		1.535	1.00556		3.07	9.05
				3	8		1.57	1.63571		3.14	11.45
				6	10		2.466	0.825556		12.33	7.43
				3	3		4	2.67		8	5.34
				7	4		4.66667	2.39		28	7.17
				15	8		2.35214	1.69		32.93	11.83
				4	6		3.38	1.578		10.14	7.89
				8	8		2.05714	2.18429		14.4	15.29
				5	5		1.4125	2.625		5.65	10.5
				4	5		3.98	2.165		11.94	8.66
				6	7		2.354	2.48167		11.77	14.89
				3	7		2.74	2		5.48	12
				5	3		2.7675	3.02		11.07	6.04
				9	21		3.2775	1.4675		26.22	29.35
				3	10		2.16	2.13667		4.32	19.23
				3	28		1.445	1.48148		2.89	40
				37	7		1.91083	1.78667		68.79	10.72
				7	8		2.465	2.17714		14.79	15.24
				10	7		1.62222	2.22333		14.6	13.34
				13	11		2.4875	1.796		29.85	17.96
				30	4		2.18172	2.69667		63.27	8.09
				11	8		2.28	1.83286		22.8	12.83
				3	9		1.53	1.6575		3.06	13.26
				7	14		2.22833	1.43692		13.37	18.68
				4	6		4.05	1.724		12.15	8.62
				3	4		3.645	1.29		7.29	3.87
				7	15		3.05333	1.94571		18.32	27.24
				3	11		1.44	1.564		2.88	15.64
				5	28		1.655	1.64222		6.62	44.34
				3	7		0.81	1.57833		1.62	9.47
				3	7		1.975	2.285		3.95	13.71
				6	34		1.306	1.53788		6.53	50.75
				3	4		1.63	2.05333		3.26	6.16
				14	4		1.18538	1.25		15.41	3.75
				5	13		1.495	1.71917		5.98	20.63
				8	3		0.908571	2.615		6.36	5.23
				7	16		1.58333	1.81		9.5	27.15
				3	5		1.635	2.69		3.27	10.76
				7	10		1.28333	1.39667		7.7	12.57
				4	39		0.566667	1.47579		1.7	56.08
				4	9		1.78667	1.66375		5.36	13.31
				3	5		1.8	1.3375		3.6	5.35
				3	7		0.435	1.63167		0.87	9.79
				5	8		0.9575	1.84857		3.83	12.94
				3	15		1.465	1.79214		2.93	25.09
				6	15		2.468	2.29143		12.34	32.08
				3	9		2.23	1.63875		4.46	13.11
				3	3		1.63	1.735		3.26	3.47
				4	4		2.29333	2.22333		6.88	6.67
				3	5		1.205	3.375		2.41	13.5
				8	4		1.53143	2.21333		10.72	6.64
				9	13		1.2825	2.285		10.26	27.42
				14	7		1.94538	1.475		25.29	8.85
				9	11		2.07875	1.711		16.63	17.11
				3	8		1.46	2.81857		2.92	19.73
				3	7		1.69	0.663333		3.38	3.98
				3	19		2.1	1.89833		4.2	34.17
				4	4		1.86667	1.43		5.6	4.29
				13	32		1.45083	1.61742		17.41	50.14
				3	3		1.71	2.6		3.42	5.2
				5	10		2.1425	2.18556		8.57	19.67
				4	9		2.92333	1.585		8.77	12.68
				3	4		2.68	2.55333		5.36	7.66
				4	5		2.08333	2.21		6.25	8.84
				3	5		1.44	1.6325		2.88	6.53
				18	3		1.57059	2.175		26.7	4.35
				5	13		1.605	1.35417		6.42	16.25
				3	6		1.3	1.818		2.6	9.09
				5	16		1.2875	1.61133		5.15	24.17
				3	33		1.775	2.01125		3.55	64.36
				3	4		2.375	1.08333		4.75	3.25
				4	9		2.02	2.14875		6.06	17.19
				3	6		2.08	1.738		4.16	8.69
				4	5		2.06667	2.1075		6.2	8.43
				8	3		1.91714	1.575		13.42	3.15
				3	15		0.845	1.89643		1.69	26.55
				6	20		1.062	1.78211		5.31	33.86
				8	36		1.58714	1.49914		11.11	52.47
				25	5		1.59125	1.97		38.19	7.88
				10	7		1.29222	1.56667		11.63	9.4
				13	9		1.6125	2.10875		19.35	16.87
				8	8		1.39571	2.31429		9.77	16.2
				3	3		1.115	1.265		2.23	2.53
				3	5		0.305	1.9475		0.61	7.79
				3	17		1.73	1.60563		3.46	25.69
				5	3		1.925	1.82		7.7	3.64
				3	44		3.275	1.26233		6.55	54.28
				3	4		1.85	1.31		3.7	3.93
				4	18		0.56	1.41529		1.68	24.06
				7	22		1.50667	1.24857		9.04	26.22
				10	42		1.41778	1.34488		12.76	55.14
				5	4		1.6225	2.27667		6.49	6.83
				7	28		1.33833	1.48593		8.03	40.12
				5	5		1.9675	1.36		7.87	5.44
				13	20		1.39917	1.32368		16.79	25.15
				5	5		1.41	1.7875		5.64	7.15
				3	37		0.93	1.53528		1.86	55.27
				3	3		1.405	2.31		2.81	4.62
				31	9		1.414	1.49125		42.42	11.93
				12	4		1.38546	2.96		15.24	8.88
				4	16		1.39333	1.206		4.18	18.09
				7	8		1.345	1.43571		8.07	10.05
				6	16		1.72	1.29333		8.6	19.4
				9	16		1.635	1.584		13.08	23.76
				15	13		1.43857	1.33		20.14	15.96
				3	4		1.95	1.57667		3.9	4.73
				3	5		0.59	2.19		1.18	8.76
				5	5		1.885	1.7375		7.54	6.95
				4	12		1.87333	1.70454		5.62	18.75
				4	3		1.86333	1.615		5.59	3.23
				4	3		2.10333	1.985		6.31	3.97
				3	3		1.36	2		2.72	4
				10	3		1.36778	2.225		12.31	4.45
				3	6		1.165	0.986		2.33	4.93
				5	6		1.3	1.474		5.2	7.37
				3	4		0.465	2.61333		0.93	7.84
				3	3		0.42	0.955		0.84	1.91
				5	14		0.53	1.63923		2.12	21.31
				3	4		0.81	1.58667		1.62	4.76
				4	6		0.893333	1.752		2.68	8.76
				3	13		0.355	1.73333		0.71	20.8
				3	16		1.02	1.65733		2.04	24.86
				4	10		1.09333	1.53		3.28	13.77
				4	5		0.563333	2.34		1.69	9.36
				4	14		0.63	1.53385		1.89	19.94
				3	7		0.585	3.22333		1.17	19.34
				3	13		1.77	1.65667		3.54	19.88
				3	7		1.605	1.47167		3.21	8.83
				7	24		1.29	1.68261		7.74	38.7
				7	14		1.38167	1.59231		8.29	20.7
				6	7		1.084	1.66		5.42	9.96
				5	13		1.835	1.76667		7.34	21.2
				6	13		0.932	1.44167		4.66	17.3
				8	5		1.05429	1.9075		7.38	7.63
				3	4		0.6	1.19		1.2	3.57
				6	23		1.42	1.375		7.1	30.25
				4	3		0.753333	2.21		2.26	4.42
				3	6		1	1.626		2	8.13
				3	6		0.335	2.168		0.67	10.84
				5	25		1.295	1.59583		5.18	38.3
				3	5		0.735	1.94		1.47	7.76
				7	4		1.075	2.86667		6.45	8.6
				6	5		0.854	0.855		4.27	3.42
				4	4		0.893333	1.91333		2.68	5.74
				3	3		0.575	0.485		1.15	0.97
				3	5		0.76	1.6975		1.52	6.79
				3	19		0.865	1.79444		1.73	32.3
				5	5		1.1125	2.5825		4.45	10.33
				4	3		0.81	2.57		2.43	5.14
				3	6		1.34	2.576		2.68	12.88
				9	13		1.37375	2.1825		10.99	26.19
				7	5		1.16333	1.2975		6.98	5.19
				7	12		1.39333	2.11182		8.36	23.23
				5	17		0.875	1.53375		3.5	24.54
				3	14		0.785	1.30077		1.57	16.91
				7	3		1.35667	2.57		8.14	5.14
				4	4		1.49667	1.68667		4.49	5.06
				8	17		1.17429	1.76937		8.22	28.31
				4	7		0.92	2.23167		2.76	13.39
				7	21		1.01	2.2395		6.06	44.79
				6	22		0.996	1.90048		4.98	39.91
				8	4		1.1	2.42667		7.7	7.28
				3	7		1.56	1.24167		3.12	7.45
				7	3		0.736667	1.375		4.42	2.75
				7	4		1.04167	1.44333		6.25	4.33
				3	5		0.845	2.19		1.69	8.76
				5	6		1.2775	2.398		5.11	11.99
				3	6		0.77	2.872		1.54	14.36
				14	11		1.09923	2.236		14.29	22.36
				3	4		1.99	2.05		3.98	6.15
				7	7		1.33	2.65667		7.98	15.94
				11	3		0.91	2.105		9.1	4.21
				12	3		1.15545	2.49		12.71	4.98
				6	6		1.562	1.72		7.81	8.6
				16	4		1.01733	1.51333		15.26	4.54
				3	3		2.095	1.51		4.19	3.02
				5	3		0.675	2.455		2.7	4.91
				8	3		1.18714	2.225		8.31	4.45
				9	3		0.975	2.215		7.8	4.43
				7	7		1.53333	1.22833		9.2	7.37
				7	4		1.37	1.36333		8.22	4.09
				4	10		1.88667	1.52889		5.66	13.76
				3	3		0.78	1.76		1.56	3.52
				3	6		1.275	1.416		2.55	7.08
				3	7		0.855	1.375		1.71	8.25
				8	5		0.854286	1.195		5.98	4.78
				5	6		1.0825	1.918		4.33	9.59
				8	8		0.928571	2.27		6.5	15.89
				3	5		0.63	1.8475		1.26	7.39
				12	6		1.27636	2.184		14.04	10.92
				8	4		0.968571	1.55333		6.78	4.66
				9	3		1.08875	1.6		8.71	3.2
				12	4		1.19182	1.6		13.11	4.8
				11	3		0.933	1.675		9.33	3.35
				16	3		0.91	2.095		13.65	4.19
				3	9		0.685	1.4925		1.37	11.94
				12	3		0.902727	1.24		9.93	2.48
				20	3		1.28632	1.505		24.44	3.01
				7	8		1.32	1.92571		7.92	13.48
				12	4		1.03273	2.08		11.36	6.24
				6	7		0.68	1.42333		3.4	8.54
				10	11		1.2	1.974		10.8	19.74
				6	10		0.5	2.09		2.5	18.81
				5	11		0.9075	1.67		3.63	16.7
				18	11		1.25529	1.333		21.34	13.33
				9	4		1.0375	1.86333		8.3	5.59
				4	5		1.10333	1.395		3.31	5.58
				19	16		1.05056	1.51867		18.91	22.78
				3	9		0.695	1.9775		1.39	15.82
				6	4		2.23	1.37333		11.15	4.12
				4	11		3.09	1.369		9.27	13.69
				8	5		2.46143	1.8		17.23	7.2
				3	7		1.28	2.28667		2.56	13.72
				6	3		2.512	1.615		12.56	3.23
				5	5		1.7625	2.1975		7.05	8.79
				10	11		1.82667	1.375		16.44	13.75
				3	4		1.865	1.04		3.73	3.12
				6	5		1.828	1.63		9.14	6.52
				3	3		1.78	1.13		3.56	2.26
				11	9		1.877	2.02875		18.77	16.23
				4	4		2.15333	1.35		6.46	4.05
				12	5		2.51727	1.5325		27.69	6.13
				12	3		2.03	0.98		22.33	1.96
				10	23		2	1.925		18	42.35
				5	3		1.9175	1.605		7.67	3.21
				4	11		2.12	1.614		6.36	16.14
				16	4		2.19067	2.32		32.86	6.96
				5	14		1.795	2.03308		7.18	26.43
				12	11		1.72	1.416		18.92	14.16
				3	13		3.05	1.51		6.1	18.12
				6	7		1.842	1.85667		9.21	11.14
				3	4		3.01	1.58333		6.02	4.75
				5	6		2.5525	2.47		10.21	12.35
				3	5		1.275	1.4925		2.55	5.97
				4	3		2.62	1.57		7.86	3.14
				24	7		1.47783	1.43167		33.99	8.59
				3	8		1.675	1.88143		3.35	13.17
				9	15		1.79125	1.585		14.33	22.19
				6	5		2.32	1.425		11.6	5.7
				8	3		1.29286	1.495		9.05	2.99
				4	4		1.74	1.13667		5.22	3.41
				4	4		0.876667	0.533333		2.63	1.6
				5	8		2.6125	1.31286		10.45	9.19
				3	3		0.53	0.43		1.06	0.86
				4	8		2.23333	1.22		6.7	8.54
				12	4		1.98545	0.38		21.84	1.14
				8	6		2.40429	0.96		16.83	4.8
				3	6		3.855	0.874		7.71	4.37
				5	3		1.1975	0.65		4.79	1.3
				14	4		1.41615	0.836667		18.41	2.51
				3	14		2.915	1.53692		5.83	19.98
				9	18		2.45125	1.44059		19.61	24.49
				3	5		2.29	0.965		4.58	3.86
				12	4		1.82	0.893333		20.02	2.68
				7	4		2.34167	0.82		14.05	2.46
				6	10		1.304	1.60778		6.52	14.47
				7	4		2.65	0.51		15.9	1.53
				6	5		2.448	0.6075		12.24	2.43
				3	4		0.255	1.74		0.51	5.22
				6	3		1.782	1.075		8.91	2.15
				13	4		2.23	1.29667		26.76	3.89
				9	4		1.63	0.443333		13.04	1.33
				9	6		1.6925	1.478		13.54	7.39
				22	3		2.03286	0.725		42.69	1.45
				4	6		1.82667	2.024		5.48	10.12
				9	3		2.0125	0.775		16.1	1.55
				6	4		1.448	1.72667		7.24	5.18
				15	8		1.57286	0.997143		22.02	6.98
				5	3		0.985	0.395		3.94	0.79
				5	6		0.995	1.092		3.98	5.46
				19	4		0.977222	1.47333		17.59	4.42
				49	7		1.25229	1.29833		60.11	7.79
				5	5		1.7775	1.11		7.11	4.44
				9	3		1.97625	0.625		15.81	1.25
				11	5		1.541	1.805		15.41	7.22
				5	7		1.4025	1.01167		5.61	6.07
				7	4		1.27667	1.72		7.66	5.16
				8	5		1.83143	0.9175		12.82	3.67
				8	4		1.82429	1.32333		12.77	3.97
				5	6		0.11	0.812		0.44	4.06
				4	4		0.08	0.626667		0.24	1.88
				3	7		0.02	1.61667		0.04	9.7
				3	5		0.07	1.0775		0.14	4.31
				7	6		0.145	0.746		0.87	3.73
				14	7		0.110769	1.53333		1.44	9.2
				4	12		0.07	0.901818		0.21	9.92
				3	5		0.065	1.7575		0.13	7.03
				8	3		0.058571	0.71		0.41	1.42
				10	3		0.097778	0.8		0.88	1.6
				3	3		0.24	1		0.48	2
				3	5		0.225	0.975		0.45	3.9
				3	5		0.215	0.9975		0.43	3.99
				8	18		0.082857	1.45823		0.58	24.79
				7	7		0.11	1.235		0.66	7.41
				8	3		0.15	0.72		1.05	1.44
				5	4		0.0825	0.573333		0.33	1.72
				4	3		0.083333	1.97		0.25	3.94
				11	9		0.094	1.24875		0.94	9.99
				12	3		0.124545	1.97		1.37	3.94
				11	3		0.114	2.125		1.14	4.25
				6	5		0.066	1.2275		0.33	4.91
				8	4		0.098571	1.90667		0.69	5.72
				17	10		0.12875	0.744444		2.06	6.7
				8	12		0.131429	1.25091		0.92	13.76
				11	11		0.111	0.996		1.11	9.96
				14	7		0.073077	0.828333		0.95	4.97
				10	3		0.09	1.03		0.81	2.06
				3	16		0.07	1.1		0.14	16.5
				6	11		0.076	0.893		0.38	8.93
				25	4		0.0975	1.29333		2.34	3.88
				8	3		0.104286	0.555		0.73	1.11
				14	15		0.090769	0.198571		1.18	2.78
				15	4		0.116429	0.356667		1.63	1.07
				12	5		0.107273	0.175		1.18	0.7
				4	20		0.066667	0.265263		0.2	5.04
				13	4		0.075	0.283333		0.9	0.85
				10	6		0.108889	0.22		0.98	1.1
				9	10		0.1075	0.234444		0.86	2.11
				5	3		0.1225	0.175		0.49	0.35
				10	4		0.113333	0.426667		1.02	1.28
				11	8		0.08	0.211429		0.8	1.48
				4	5		0.096667	0.12		0.29	0.48
				20	5		0.101053	0.36		1.92	1.44
				17	11		0.094375	0.334		1.51	3.34
				16	4		0.124667	0.29		1.87	0.87
				3	4		0.095	0.276667		0.19	0.83
				6	4		0.112	0.526667		0.56	1.58
				21	4		0.105	0.26		2.1	0.78
				6	4		0.096	0.573333		0.48	1.72
				8	5		0.061429	0.1825		0.43	0.73
				4	14		0.046667	0.156154		0.14	2.03
				4	11		0.056667	0.315		0.17	3.15
				13	5		0.085	0.195		1.02	0.78
				12	3		0.127273	0.24		1.4	0.48
				12	4		0.09	0.126667		0.99	0.38
				20	6		0.092632	0.246		1.76	1.23
				6	5		0.07	0.315		0.35	1.26
				4	8		0.063333	0.071429		0.19	0.5
				17	3		0.1075	0.07		1.72	0.14
				16	3		0.134667	0.1		2.02	0.2
				13	15		0.09	0.194286		1.08	2.72
				19	3		0.121667	0.35		2.19	0.7
				8	3		0.065714	0.165		0.46	0.33
				6	3		0.088	0.48		0.44	0.96
				15	4		0.137857	0.343333		1.93	1.03
				7	3		0.085	0.135		0.51	0.27
				11	4		0.164	0.186667		1.64	0.56
				14	6		0.062308	0.236		0.81	1.18
				9	3		0.12625	0.4		1.01	0.8
				10	7		0.192222	0.121667		1.73	0.73
				14	4		0.123846	0.176667		1.61	0.53
				15	11		0.093571	0.189		1.31	1.89
				19	5		0.08	0.3975		1.44	1.59
				6	3		0.124	0.265		0.62	0.53
				7	5		0.111667	0.1725		0.67	0.69
				6	3		0.212	0.22		1.06	0.44
				3	3		0.17	0.41		0.34	0.82
				5	3		0.175	0.325		0.7	0.65
				9	3		0.1575	0.615		1.26	1.23
				8	4		0.077143	0.48		0.54	1.44
				3	3		0.145	0.165		0.29	0.33
				6	3		0.132	0.185		0.66	0.37
				5	4		0.14	0.116667		0.56	0.35
				5	5		0.09	0.1225		0.36	0.49
				11	7		0.155	0.143333		1.55	0.86
				3	3		0.09	0.19		0.18	0.38
				5	7		0.1675	0.183333		0.67	1.1
				6	9		0.118	0.12625		0.59	1.01
				33	10		0.123438	0.166667		3.95	1.5
				4	10		0.186667	0.207778		0.56	1.87
				4	5		0.143333	0.19		0.43	0.76
				3	9		0.12	0.2325		0.24	1.86
				13	3		0.120833	0.39		1.45	0.78
				6	5		0.086	0.195		0.43	0.78
				19	20		0.128333	0.142105		2.31	2.7
				18	5		0.084706	0.1025		1.44	0.41
				3	20		0.07	0.172105		0.14	3.27
				14	11		0.122308	0.168		1.59	1.68
				6	3		0.054	0.06		0.27	0.12
				8	6		0.154286	0.12		1.08	0.6
				8	17		0.111429	0.141875		0.78	2.27
				16	11		0.114	0.141		1.71	1.41
				6	9		0.146	0.1825		0.73	1.46
				16	20		0.074667	0.175263		1.12	3.33
				12	11		0.080909	0.116		0.89	1.16
				14	24		0.086154	0.171739		1.12	3.95
				20	4		0.136842	0.026667		2.6	0.08
				7	16		0.168333	0.101333		1.01	1.52
				3	9		0.195	0.20625		0.39	1.65
				4	3		0.203333	0.215		0.61	0.43
				5	3		0.15	0.1		0.6	0.2
				8	12		0.117143	0.14		0.82	1.54
				4	7		0.146667	0.098333		0.44	0.59
				6	8		0.114	0.08		0.57	0.56
				10	22		0.123333	0.172857		1.11	3.63
				16	11		0.097333	0.172		1.46	1.72
				9	6		0.1025	0.18		0.82	0.9
				5	8		0.11	0.201429		0.44	1.41
				4	8		0.213333	0.17		0.64	1.19
				4	6		0.166667	0.19		0.5	0.95
				5	4		0.18	0.166667		0.72	0.5
				3	3		0.185	0.17		0.37	0.34
				16	6		0.103333	0.2		1.55	1
				4	11		3.45	0.106		10.35	1.06
				3	22		1.81	0.159524		3.62	3.35
				3	3		2.355	0.075		4.71	0.15
				3	28		1.95	0.117037		3.9	3.16
				5	7		4.1325	0.193333		16.53	1.16
				6	4		2.49	0.203333		12.45	0.61
				3	6		3.82	0.108		7.64	0.54
				4	5		1.69333	0.205		5.08	0.82
				5	18		3.5325	0.112353		14.13	1.91
				4	11		1.11333	0.074		3.34	0.74
				5	7		2.2925	0.086667		9.17	0.52
				4	3		5.14333	0.07		15.43	0.14
				4	5		1.30667	0.075		3.92	0.3
				3	16		2.97	0.122667		5.94	1.84
				4	9		1.04333	0.11625		3.13	0.93
				5	3		2.08	0.08		8.32	0.16
				3	12		5.67	0.147273		11.34	1.62
				3	3		1.775	0.035		3.55	0.07
				9	8		2.1425	0.195714		17.14	1.37
				5	3		1.3075	0.2		5.23	0.4
				19	9		2.495	0.08125		44.91	0.65
				15	6		3.10643	0.136		43.49	0.68
				15	8		2.04571	0.132857		28.64	0.93
				3	3		6.04	0.21		12.08	0.42
				5	8		2.33	0.16		9.32	1.12
				30	6		1.89379	0.16		54.92	0.8
				51	3		2.3714	0.23		118.57	0.46
				8	4		2.06143	0.066667		14.43	0.2
				7	3		3.085	0.08		18.51	0.16
				4	4		1.55667	0.16		4.67	0.48
				9	3		2.655	0.27		21.24	0.54
				10	3		1.70667	0.1		15.36	0.2
				10	3		2.48889	0.19		22.4	0.38
				8	10		1.25857	0.127778		8.81	1.15
				8	6		1.62857	0.104		11.4	0.52
				3	3		0.515	0.085		1.03	0.17
				4	3		1.53667	0.105		4.61	0.21
				10	12		3.47889	0.200909		31.31	2.21
				3	3		6.29	0.075		12.58	0.15
				3	8		1.265	0.108571		2.53	0.76
				12	9		3.12818	0.10625		34.41	0.85
				6	3		2.388	0.075		11.94	0.15
				5	5		3.0125	0.14		12.05	0.56
				3	8		5.06	0.117143		10.12	0.82
				3	3		1.515	0.13		3.03	0.26
				6	4		2.608	0.07		13.04	0.21
				9	4		2.615	0.033333		20.92	0.1
				10	4		2.80222	0.086667		25.22	0.26
				10	14		2.55111	0.137692		22.96	1.79
				23	3		2.53182	0.15		55.7	0.3
				20	4		1.96368	0.086667		37.31	0.26
				13	5		2.37917	0.135		28.55	0.54
				6	3		2.716	0.22		13.58	0.44
				6	6		3.704	0.112		18.52	0.56
				3	4		2.99	0.12		5.98	0.36
				19	13		2.10333	0.1175		37.86	1.41
				33	4		2.33156	0.146667		74.61	0.44
				6	3		2.768	0.105		13.84	0.21
				14	6		2.13846	0.166		27.8	0.83
				19	3		2.06833	0.18		37.23	0.36
				4	4		2.49333	0.09		7.48	0.27
				5	3		2.8275	0.08		11.31	0.16
				6	4		2.03	0.056667		10.15	0.17
				33	3		1.63406	0.155		52.29	0.31
				9	3		1.82125	0.325		14.57	0.65
				3	4		1.095	0.136667		2.19	0.41
				10	3		2.03222	0.225		18.29	0.45
				4	3		2.24	0.13		6.72	0.26
				5	5		1.8275	0.14		7.31	0.56
				9	33		1.8575	0.102813		14.86	3.29
				4	3		1.36	0.135		4.08	0.27
				21	5		1.268	0.2125		25.36	0.85
				22	3		1.28714	0.06		27.03	0.12
				4	3		1.39333	0.06		4.18	0.12
				4	8		2.34667	0.16		7.04	1.12
				3	3		1.775	0.075		3.55	0.15
				3	6		0.845	0.132		1.69	0.66
				7	10		2.975	0.105556		17.85	0.95
				3	8		2.115	0.088571		4.23	0.62
				7	5		3.75167	0.105		22.51	0.42
				35	3		1.29353	0.11		43.98	0.22
				15	6		1.31143	0.128		18.36	0.64
				3	3		3.805	0.14		7.61	0.28
				3	3		3.81	0.18		7.62	0.36
				4	5		5.27667	0.11		15.83	0.44
				4	4		18.7267	0.096667		56.18	0.29
				19	6		9.32944	0.17		167.93	0.85
				4	5		8.25667	0.1325		24.77	0.53
				4	3		1.28333	0.195		3.85	0.39
				3	4		26.89	0.093333		53.78	0.28
				5	4		20.9175	0.173333		83.67	0.52
				3	4		14.9	0.08		29.8	0.24
				4	6		5.86333	0.154		17.59	0.77
				7	4		8.10167	0.103333		48.61	0.31
				5	11		4.9	0.106		19.6	1.06
				3	6		3.43	0.132		6.86	0.66
				3	5		2.9	0.1075		5.8	0.43
				7	3		3.58	0.075		21.48	0.15
				5	4		2.9	0.083333		11.6	0.25
				10	4		2.30889	0.193333		20.78	0.58
				3	5		1.14	0.125		2.28	0.5
				8	3		1.56	0.135		10.92	0.27
				6	4		2.432	0.106667		12.16	0.32
				5	6		4.19	0.246		16.76	1.23
				31	3		2.16133	0.115		64.84	0.23
				6	11		3.324	0.167		16.62	1.67
				16	8		2.094	0.215714		31.41	1.51
				24	9		2.00348	0.13875		46.08	1.11
				6	6		2.37	0.144		11.85	0.72
				13	8		3.22917	0.164286		38.75	1.15
				6	5		2.318	0.2375		11.59	0.95
				3	5		2.54	0.1575		5.08	0.63
				16	10		2.08133	0.141111		31.22	1.27
				4	6		3.01667	0.172		9.05	0.86
				22	7		1.70095	0.12		35.72	0.72
				13	6		1.45667	0.174		17.48	0.87
				15	5		2.65071	0.14		37.11	0.56
				4	7		2.33667	0.115		7.01	0.69
				14	3		2.03846	0.145		26.5	0.29
				6	6		2.77	0.118		13.85	0.59
				5	4		4.665	0.106667		18.66	0.32
				3	3		2.64	0.41		5.28	0.82
				18	3		1.45882	0.04		24.8	0.08
				14	3		1.84308	0.03		23.96	0.06
				4	3		1.32	0.2		3.96	0.4
				4	14		1.95	0.188462		5.85	2.45
				11	18		2.73	0.136471		27.3	2.32
				5	4		1.5025	0.163333		6.01	0.49
				7	9		1.87667	0.1475		11.26	1.18
				14	5		2.54846	0.175		33.13	0.7
				3	8		0.635	0.128571		1.27	0.9
				7	23		0.606667	0.172727		3.64	3.8
				4	5		2.17333	0.16		6.52	0.64
				7	3		2.345	0.21		14.07	0.42
				34	10		2.60333	0.212222		85.91	1.91
				4	6		4.22333	0.174		12.67	0.87
				5	6		1.5275	0.198		6.11	0.99
				13	3		1.77917	0.185		21.35	0.37
				9	4		2.295	0.226667		18.36	0.68
				8	34		2.29	0.136667		16.03	4.51
				12	8		1.57091	0.137143		17.28	0.96
				4	3		2.41333	0.22		7.24	0.44
				20	11		2.35105	0.136		44.67	1.36
				8	37		1.63429	0.125278		11.44	4.51
				12	33		1.29909	0.136875		14.29	4.38
				10	7		1.49	0.221667		13.41	1.33
				6	23		2.784	0.185909		13.92	4.09
				7	7		2.035	0.27		12.21	1.62
				3	10		1.24	0.181111		2.48	1.63
				7	6		2.11	0.17		12.66	0.85
				4	3		1.80333	0.245		5.41	0.49
				4	5		3.15333	0.1225		9.46	0.49
				25	3		2.01292	0.065		48.31	0.13
				26	22		1.3908	0.12381		34.77	2.6
				3	23		1.225	0.154545		2.45	3.4
				3	37		4.67	0.133611		9.34	4.81
				4	7		1.58667	0.126667		4.76	0.76
				11	3		1.535	0.155		15.35	0.31
				12	14		1.04182	0.156154		11.46	2.03
				4	7		0.33	0.138333		0.99	0.83
				7	9		0.678333	0.10125		4.07	0.81
				3	7		0.155	0.126667		0.31	0.76
				5	3		1.02	88.185		4.08	176.37
				6	9		0.65	55.8162		3.25	446.53
				14	3		1.03846	1.49		13.5	2.98
				9	8		0.82875	3.12571		6.63	21.88
				26	3		0.716	4.385		17.9	8.77
				12	12		0.908182	1.77636		9.99	19.54
				14	12		0.737692	2.03273		9.59	22.36
				13	16		0.7975	2.018		9.57	30.27
				4	9		0.56	2.31		1.68	18.48
				7	17		0.323333	1.98375		1.94	31.74
				3	3		0.455	5.34		0.91	10.68
				7	12		0.356667	2.77182		2.14	30.49
				26	3		0.9584	2.92		23.96	5.84
				7	21		0.778333	3.61		4.67	72.2
				11	3		0.594	2.42		5.94	4.84
				3	5		2.165	2.7025		4.33	10.81
				10	15		0.932222	3.54714		8.39	49.66
				3	3		1.07	3		2.14	6
				3	14		0.575	3.02077		1.15	39.27
				3	6		0.25	2.952		0.5	14.76
				4	3		0.443333	3.22		1.33	6.44
				11	12		1.46	3.33		14.6	36.63
				3	20		0.76	2.26579		1.52	43.05
				15	3		1.25786	3.675		17.61	7.35
				3	10		1.385	3.15444		2.77	28.39
				10	3		0.905556	5.37		8.15	10.74
				5	3		0.9825	2.695		3.93	5.39
				12	10		1.07	2.37111		11.77	21.34
				28	5		1.2037	1.395		32.5	5.58
				12	4		1.13818	3.59		12.52	10.77
				5	21		1.525	2.7375		6.1	54.75
				3	23		1.205	2.305		2.41	50.71
				26	13		1.2464	4.405		31.16	52.86
				9	6		1.175	3.042		9.4	15.21
				11	7		1.118	5.19833		11.18	31.19
				5	6		1.3575	5.982		5.43	29.91
				9	3		0.83375	3.7		6.67	7.4
				3	4		0.325	5.75667		0.65	17.27
				17	4		0.891875	5.32667		14.27	15.98
				12	3		1.09	8.62		11.99	17.24
				7	8		1.6	5.17143		9.6	36.2
				10	4		1.63444	7.27667		14.71	21.83
				11	3		1.282	2.71		12.82	5.42
				4	6		0.716667	6.366		2.15	31.83
				12	4		0.829091	5.21		9.12	15.63
				11	3		1.494	15.205		14.94	30.41
				11	3		1.129	5.74		11.29	11.48
				33	5		1.2625	2.3725		40.4	9.49
				8	7		0.968571	7.71333		6.78	46.28
				4	5		1.16333	4.2825		3.49	17.13
				3	5		1.56	3.9325		3.12	15.73
				15	6		1.14286	3.23		16	16.15
				12	3		1.23182	5.455		13.55	10.91
				10	17		0.92	6.94625		8.28	111.14
				4	10		0.863333	7.99667		2.59	71.97
				6	3		0.912	7.965		4.56	15.93
				7	16		1.30667	4.99		7.84	74.85
				6	5		1.446	6.605		7.23	26.42
				7	13		1.185	4.01667		7.11	48.2
				7	9		1.645	3.57875		9.87	28.63
				14	4		0.806923	6.26		10.49	18.78
				4	6		1.22	0.478		3.66	2.39
				8	6		1.59	0.804		11.13	4.02
				9	3		1.1025	0.96		8.82	1.92
				5	6		1.7775	0.842		7.11	4.21
				7	5		1.23833	0.9575		7.43	3.83
				10	14		1.01	1.69308		9.09	22.01
				3	7		0.92	1.34333		1.84	8.06
				5	7		1.455	0.815		5.82	4.89
				8	7		1.22429	0.881667		8.57	5.29
				6	7		0.628	1.28667		3.14	7.72
				4	4		1.23333	1.05667		3.7	3.17
				16	4		1.18667	0.93		17.8	2.79
				3	12		0.865	0.841818		1.73	9.26
				3	5		0.89	1.025		1.78	4.1
				8	7		0.864286	1.48167		6.05	8.89
				25	10		1.12458	1.04778		26.99	9.43
				26	8		0.7132	1.17714		17.83	8.24
				7	3		1.97	0.51		11.82	1.02
				9	4		0.99875	2.34		7.99	7.02
				17	18		1.21938	1.26882		19.51	21.57
				29	3		0.865357	1.115		24.23	2.23
				6	11		1.944	1.212		9.72	12.12
				12	10		2.24182	1.09889		24.66	9.89
				7	3		3.06	0.68		18.36	1.36
				10	3		2.34556	2.3		21.11	4.6
				10	5		2.32444	0.835		20.92	3.34
				12	4		1.90091	0.78		20.91	2.34
				6	21		1.44	1.016		7.2	20.32
				27	4		1.95461	0.646667		50.82	1.94
				4	11		1.47	0.87		4.41	8.7
				6	7		1.456	0.831667		7.28	4.99
				7	3		2.37833	0.96		14.27	1.92
				15	14		2.05286	1.43923		28.74	18.71
				72	3		1.3831	0.9		98.2	1.8
				10	30		1.48444	0.876897		13.36	25.43
				6	5		1.03	0.71		5.15	2.84
				11	13		1.611	1.23917		16.11	14.87
				10	11		1.37	0.724		12.33	7.24
				13	50		1.05917	0.747551		12.71	36.63
				7	5		0.838333	1.795		5.03	7.18
				4	4		0.743333	1.15667		2.23	3.47
				23	11		1.25773	1.054		27.67	10.54
				5	15		1.525	1.04214		6.1	14.59
				3	3		0.415	0.615		0.83	1.23
				33	7		1.35187	1.1		43.26	6.6
				18	7		1.72118	1.075		29.26	6.45
				6	7		1.45	0.653333		7.25	3.92
				12	33		2.51636	0.839375		27.68	26.86
				23	6		1.38955	1.02		30.57	5.1
				3	3		0.375	1.065		0.75	2.13
				4	4		0.593333	1.70667		1.78	5.12
				4	5		1.42	0.3675		4.26	1.47
				5	5		3.0525	1.96		12.21	7.84
				5	15		1.4	1.03071		5.6	14.43
				15	7		1.40714	1.32333		19.7	7.94
				6	6		1.99	0.794		9.95	3.97
				7	3		1.78333	2.64		10.7	5.28
				6	8		2.1	1.10714		10.5	7.75
				11	4		1.749	1.42667		17.49	4.28
				14	5		1.90846	1.2425		24.81	4.97
				5	11		1.7025	1.639		6.81	16.39
				3	4		1.455	0.283333		2.91	0.85
				3	5		1.165	1.9075		2.33	7.63
				3	4		0.585	1.59667		1.17	4.79
				3	3		2.805	0.715		5.61	1.43
				8	12		1.65143	0.847273		11.56	9.32
				3	3		0.71	0.84		1.42	1.68
				11	3		1.076	2.125		10.76	4.25
				6	9		1.384	1.32625		6.92	10.61
				3	3		1.045	0.24		2.09	0.48
				4	6		0.84	2.372		2.52	11.86
				4	3		1.13	2.47		3.39	4.94
				8	3		1.23429	1.205		8.64	2.41
				4	10		1.41	0.812222		4.23	7.31
				4	9		1.61333	1.20125		4.84	9.61
				3	9		1.68	1.4425		3.36	11.54
				9	4		1.1725	1.55667		9.38	4.67
				24	3		1.17783	1.235		27.09	2.47
				3	4		1.605	0.833333		3.21	2.5
				3	4		1.365	0.896667		2.73	2.69
				3	6		0.355	0.906		0.71	4.53
				10	4		1.38111	0.936667		12.43	2.81
				4	14		0.933333	1.02308		2.8	13.3
				9	6		1.6975	0.818		13.58	4.09
				10	7		1.16778	1.35		10.51	8.1
				25	16		1.0025	1.45667		24.06	21.85
				8	6		0.927143	0.478		6.49	2.39
				6	8		0.72	1.31857		3.6	9.23
				7	3		0.73	1.11		4.38	2.22
				3	4		0.555	0.886667		1.11	2.66
				5	11		0.845	1.205		3.38	12.05
				7	13		1.37333	1.68583		8.24	20.23
				6	15		1.186	0.913571		5.93	12.79
				11	4		1.86	0.573333		18.6	1.72
				13	5		1.02417	1.94		12.29	7.76
				21	5		1.018	0.605		20.36	2.42
				3	4		2.515	0.6		5.03	1.8
				6	11		1.114	0.73		5.57	7.3
				3	17		0.445	0.92375		0.89	14.78
				4	3		0.626667	0.875		1.88	1.75
				4	3		0.8	0.25		2.4	0.5
				9	3		1.13	0.89		9.04	1.78
				6	10		0.7	1.30222		3.5	11.72
				3	8		1.435	1.37		2.87	9.59
				5	3		1.4625	0.865		5.85	1.73
				6	6		0.898	1.052		4.49	5.26
				3	7		1.9	0.791667		3.8	4.75
				3	3		1.66	1.595		3.32	3.19
				3	20		0.83	0.93		1.66	17.67
				5	7		1.575	1.10667		6.3	6.64
				5	3		1.715	0.73		6.86	1.46
				10	6		1.17333	1.474		10.56	7.37
				5	12		1.6075	1.13727		6.43	12.51
				4	9		1.52333	1.3075		4.57	10.46
				4	12		1.90333	0.7		5.71	7.7
				6	11		1.768	0.904		8.84	9.04
				5	21		0.885	0.6795		3.54	13.59
				7	6		1.04667	0.72		6.28	3.6
				3	4		2.205	0.54		4.41	1.62
				4	6		1.7	1.332		5.1	6.66
				5	15		1.5125	1.09		6.05	15.26
				3	9		1.125	0.965		2.25	7.72
				30	5		1.1931	1.4225		34.6	5.69
				4	7		1.52667	1.13167		4.58	6.79
				11	6		1.255	0.714		12.55	3.57
				4	4		1.48333	1.98		4.45	5.94
				3	13		1.105	2.195		2.21	26.34
				3	3		1.15	1.46		2.3	2.92
				21	6		1.347	1.17		26.94	5.85
				4	3		2.10667	1.26		6.32	2.52
				4	8		1.11	1.87		3.33	13.09
				14	10		1.17692	1.49		15.3	13.41
				8	5		1.50714	1.7975		10.55	7.19
				4	3		1.34667	1.02		4.04	2.04
				10	8		1.45889	1.83143		13.13	12.82
				7	4		0.92	2.01333		5.52	6.04
				9	6		1.63875	2.222		13.11	11.11
				6	4		1.212	0.923333		6.06	2.77
				14	4		1.51	1.15		19.63	3.45
				3	7		3.59	1.48667		7.18	8.92
				3	4		3.27	3.56333		6.54	10.69
				3	3		1.265	3.46		2.53	6.92
				6	12		2.572	1.97		12.86	21.67
				8	5		3.05714	1.15		21.4	4.6
				3	3		2.815	2.16		5.63	4.32
				4	8		1.66333	1.60714		4.99	11.25
				6	12		2.334	2.27818		11.67	25.06
				6	15		1.602	1.92929		8.01	27.01
				7	7		2.33833	2.58833		14.03	15.53
				9	16		2.99125	1.292		23.93	19.38
				7	9		2.53667	1.78875		15.22	14.31
				8	5		2.33143	2.0425		16.32	8.17
				8	3		2.43	1.205		17.01	2.41
				8	5		2.98571	1.4225		20.9	5.69
				20	4		2.94684	1.6		55.99	4.8
				4	6		2.95	1.79		8.85	8.95
				10	8		2.86667	1.51429		25.8	10.6
				8	15		2.67857	1.26857		18.75	17.76
				4	6		2.13	1.434		6.39	7.17
				14	8		2.30077	2.19857		29.91	15.39
				9	5		2.5375	1.87		20.3	7.48
				3	3		0.885	2.325		1.77	4.65
				10	15		3.38111	1.65071		30.43	23.11
				9	3		2.87375	1.31		22.99	2.62
				4	3		1.74667	0.875		5.24	1.75
				8	4		1.51571	2.04667		10.61	6.14
				7	6		2.155	0.968		12.93	4.84
				4	8		3.36333	1.80429		10.09	12.63
				17	9		2.28875	2.085		36.62	16.68
				3	4		1.685	1.98333		3.37	5.95
				13	24		3.275	1.38956		39.3	31.96
				8	4		3.06	1.76667		21.42	5.3
				7	3		1.86	0.86		11.16	1.72
				4	9		2.54667	1.72875		7.64	13.83
				11	5		1.854	1.495		18.54	5.98
				3	12		1.02	1.75636		2.04	19.32
				13	11		2.11083	1.507		25.33	15.07
				5	15		1.995	1.19857		7.98	16.78
				3	4		1.485	1.42		2.97	4.26
				14	6		2.18308	2.24		28.38	11.2
				6	14		2.096	1.98154		10.48	25.76
				15	5		2.115	1.565		29.61	6.26
				11	4		2.579	2.07333		25.79	6.22
				12	4		2.23182	2.32667		24.55	6.98
				19	7		2.26944	1.82667		40.85	10.96
				14	14		1.83077	1.66		23.8	21.58
				18	4		2.36765	1.70333		40.25	5.11
				3	8		1.635	1.31429		3.27	9.2
				6	3		1.756	2.57		8.78	5.14
				3	4		3.235	0.833333		6.47	2.5
				7	4		3.625	1.54667		21.75	4.64
				7	3		1.2	1.84		7.2	3.68
				5	3		2.405	0.765		9.62	1.53
				4	6		1.97667	1.532		5.93	7.66
				8	26		2.11143	1.494		14.78	37.35
				3	13		1.63	2.61667		3.26	31.4
				8	9		2.24571	2.3125		15.72	18.5
				10	10		2.16111	1.76111		19.45	15.85
				3	23		1.465	1.78273		2.93	39.22
				3	3		2.01	2.075		4.02	4.15
				3	3		2.605	3.25		5.21	6.5
				17	13		2.62938	2.27583		42.07	27.31
				8	6		2.33143	1.906		16.32	9.53
				6	8		3.716	1.44714		18.58	10.13
				5	5		1.2175	1.0675		4.87	4.27
				5	20		3.135	1.58105		12.54	30.04
				4	8		2.02	1.19571		6.06	8.37
				11	5		1.919	0.8175		19.19	3.27
				19	3		2.19111	0.69		39.44	1.38
				6	3		2.046	1.11		10.23	2.22
				3	4		2.375	1.47		4.75	4.41
				5	3		3.0875	1.145		12.35	2.29
				4	7		5.42667	0.978333		16.28	5.87
				3	5		2.97	1.07		5.94	4.28
				4	5		2.79333	1.19		8.38	4.76
				4	3		3.37667	0.64		10.13	1.28
				5	4		2.825	1.15		11.3	3.45
				6	4		2.732	0.86		13.66	2.58
				3	3		5.725	0.665		11.45	1.33
				4	4		4.04	1.01		12.12	3.03
				6	5		4.106	0.9425		20.53	3.77
				4	6		4.43	1.318		13.29	6.59
				17	5		3.84125	1.1125		61.46	4.45
				7	8		3.08167	1.29571		18.49	9.07
				4	5		1.57	1.215		4.71	4.86
				7	4		4.60167	0.683333		27.61	2.05
				6	5		2.268	2.0575		11.34	8.23
				9	21		2.82	1.1825		22.56	23.65
				7	3		2.48333	0.495		14.9	0.99
				4	6		3.37333	1.122		10.12	5.61
				6	6		1.828	0.508		9.14	2.54
				6	11		4.07	1.01		20.35	10.1
				21	10		2.836	0.8		56.72	7.2
				8	6		3.05714	0.918		21.4	4.59
				14	3		3.21077	0.37		41.74	0.74
				4	7		1.97	1.125		5.91	6.75
				3	5		2.615	0.705		5.23	2.82
				15	7		3.09214	0.888333		43.29	5.33
				9	21		3.59375	0.6775		28.75	13.55
				3	12		4.065	0.827273		8.13	9.1
				3	3		6.645	0.725		13.29	1.45
				3	5		3.125	0.8675		6.25	3.47
				12	5		2.30636	1.1825		25.37	4.73
				3	5		2.265	0.86		4.53	3.44
				11	4		3.078	0.716667		30.78	2.15
				4	4		3.86333	0.906667		11.59	2.72
				11	5		2.563	1.0075		25.63	4.03
				4	4		2.01333	0.616667		6.04	1.85
				4	3		3.39	0.92		10.17	1.84
				4	4		3.36333	0.713333		10.09	2.14
				7	3		3.67667	1.235		22.06	2.47
				3	7		3.9	0.631667		7.8	3.79
				7	7		4.86667	0.763333		29.2	4.58
				3	3		3.84	0.86		7.68	1.72
				10	13		3.12778	0.7875		28.15	9.45
				11	5		2.668	0.905		26.68	3.62
				6	4		1.726	1.06		8.63	3.18
				14	8		2.48231	0.895714		32.27	6.27
				6	4		3.912	0.763333		19.56	2.29
				14	8		1.94538	0.898571		25.29	6.29
				4	15		2.17333	0.647143		6.52	9.06
				3	6		2.07	0.656		4.14	3.28
				4	6		2.22333	0.58		6.67	2.9
				3	7		1.86	0.838333		3.72	5.03
				6	24		1.73	0.851739		8.65	19.59
				13	11		1.4925	0.876		17.91	8.76
				21	12		1.3535	0.822727		27.07	9.05
				3	9		1.405	0.97875		2.81	7.83
				3	7		1.745	0.853333		3.49	5.12
				11	7		1.699	1.235		16.99	7.41
				3	8		1.63	0.652857		3.26	4.57
				6	11		1.544	0.801		7.72	8.01
				11	4		2.017	0.816667		20.17	2.45
				8	3		1.59	0.915		11.13	1.83
				8	3		1.64	1.01		11.48	2.02
				3	3		2.495	0.945		4.99	1.89
				26	5		1.6048	1.1525		40.12	4.61
				12	3		1.06818	0.58		11.75	1.16
				10	5		2.17889	0.955		19.61	3.82
				10	4		1.33	0.733333		11.97	2.2
				3	9		1.715	0.68		3.43	5.44
				9	15		1.6475	0.809286		13.18	11.33
				8	11		1.95714	1.025		13.7	10.25
				6	5		1.976	0.845		9.88	3.38
				7	3		1.60333	0.755		9.62	1.51
				4	4		1.39667	0.526667		4.19	1.58
				5	24		2.275	0.755217		9.1	17.37
				4	7		2.99667	0.811667		8.99	4.87
				10	4		1.50667	0.883333		13.56	2.65
				5	13		1.13	0.888333		4.52	10.66
				20	7		1.53842	0.761667		29.23	4.57
				10	9		1.87333	1.30875		16.86	10.47
				24	3		1.84826	0.645		42.51	1.29
				9	4		1.52375	1.32		12.19	3.96
				5	8		1.62	1.27714		6.48	8.94
				11	11		2.041	1.473		20.41	14.73
				10	7		1.50778	2.15		13.57	12.9
				9	5		1.4675	2.635		11.74	10.54
				3	3		2.25	1.47		4.5	2.94
				3	6		1.76	1.04		3.52	5.2
				4	9		1.34333	1.95		4.03	15.6
				11	4		2.28	2.16333		22.8	6.49
				9	14		1.8175	1.23769		14.54	16.09
				10	6		1.48556	1.424		13.37	7.12
				19	3		1.37556	2.355		24.76	4.71
				12	5		1.23	1.725		13.53	6.9
				8	15		1.64286	1.37571		11.5	19.26
				5	4		1.2625	2.30667		5.05	6.92
				4	17		0.516667	1.50125		1.55	24.02
				17	17		1.365	1.53		21.84	24.48
				4	30		1.32	1.33621		3.96	38.75
				3	8		2.485	1.35857		4.97	9.51
				5	8		2.1975	0.9		8.79	6.3
				3	21		1.355	1.535		2.71	30.7
				3	9		2.185	1.61375		4.37	12.91
				13	9		1.2775	1.59875		15.33	12.79
				6	18		1.808	1.42		9.04	24.14
				8	21		1.86571	1.5695		13.06	31.39
				3	36		2.845	1.012		5.69	35.42
				4	5		2.65	2.2825		7.95	9.13
				4	8		1.36333	1.55286		4.09	10.87
				21	12		1.6315	1.93364		32.63	21.27
				28	19		1.44815	1.60667		39.1	28.92
				12	10		1.74182	1.04444		19.16	9.4
				7	7		1.97333	1.47		11.84	8.82
				15	10		1.55571	1.80889		21.78	16.28
				12	10		1.63636	1.66111		18	14.95
				3	3		2.15	1.37		4.3	2.74
				35	8		1.545	1.37		52.53	9.59
				14	6		1.41538	1.216		18.4	6.08
				5	8		1.8075	1.33286		7.23	9.33
				3	9		0.605	2.07125		1.21	16.57
				7	5		2.23	1.375		13.38	5.5
				10	6		1.52444	1.112		13.72	5.56
				9	6		1.37	1.388		10.96	6.94
				3	4		0.655	1.62667		1.31	4.88
				20	10		1.45105	1.71444		27.57	15.43
				34	6		1.56212	1.758		51.55	8.79
				9	3		1.5925	0.955		12.74	1.91
				11	6		1.688	2.088		16.88	10.44
				3	3		2.08	0.86		4.16	1.72
				7	9		1.8	1.55125		10.8	12.41
				4	6		1.35333	1.594		4.06	7.97
				24	4		1.63956	1.55333		37.71	4.66
				13	3		1.085	1.585		13.02	3.17
				14	5		1.1	1.1525		14.3	4.61
				3	5		0.495	1.3275		0.99	5.31
				31	13		1.22467	1.36167		36.74	16.34
				3	4		3.38	2.77		6.76	8.31
				8	5		2.31857	2.2425		16.23	8.97
				4	3		1.84333	2.405		5.53	4.81
				3	23		2.73	1.91364		5.46	42.1
				3	9		0.49	2.60875		0.98	20.87
				6	3		1.486	1.685		7.43	3.37
				8	3		1.63143	0.48		11.42	0.96
				6	6		1.542	1.914		7.71	9.57
				3	5		0.89	2.33		1.78	9.32
				12	3		1.28818	3.065		14.17	6.13
				6	3		2.29	2.375		11.45	4.75
				5	7		1.1825	3.08167		4.73	18.49
				3	5		1.905	2.325		3.81	9.3
				3	4		1.485	1.99		2.97	5.97
				3	3		0.76	1.915		1.52	3.83
				15	13		1.51	2.24167		21.14	26.9
				11	11		1.126	1.99		11.26	19.9
				22	13		1.34238	1.3325		28.19	15.99
				12	14		1.17182	1.37923		12.89	17.93
				3	3		2.125	1.385		4.25	2.77
				12	3		1.21273	1.38		13.34	2.76
				4	3		1.37	2.55		4.11	5.1
				3	3		0.5	0.615		1	1.23
				3	7		1.13	1.56333		2.26	9.38
				4	17		1.97667	1.7275		5.93	27.64
				7	13		2.24833	1.62833		13.49	19.54
				9	4		1.2375	2.52333		9.9	7.57
				5	3		1.8825	1.58		7.53	3.16
				4	5		1.48333	2.0675		4.45	8.27
				18	4		1.55882	1.22		26.5	3.66
				10	3		1.33556	2.585		12.02	5.17
				5	3		1.585	2.785		6.34	5.57
				4	17		1.82	2.02813		5.46	32.45
				10	3		1.54111	1.285		13.87	2.57
				6	7		2.088	1.34		10.44	8.04
				25	9		1.40833	1.4475		33.8	11.58
				23	7		0.970455	1.75833		21.35	10.55
				4	23		2.05667	1.49227		6.17	32.83
				4	3		1.75333	1.51		5.26	3.02
				3	6		0.56	1.746		1.12	8.73
				5	3		0.505	1.68		2.02	3.36
				4	4		1.48333	0.733333		4.45	2.2
				3	22		1.95	1.17286		3.9	24.63
				4	17		0.586667	1.40125		1.76	22.42
				3	4		0.545	2.27667		1.09	6.83
				5	34		1.485	1.55273		5.94	51.24
				8	7		0.811429	1.345		5.68	8.07
				43	14		1.16381	1.88615		48.88	24.52
				3	5		1.595	1.655		3.19	6.62
				14	8		1.02154	2.41143		13.28	16.88
				10	10		1.29333	1.95222		11.64	17.57
				10	5		1.46333	2.045		13.17	8.18
				7	7		1.54667	2.69333		9.28	16.16
				5	3		2.0775	3.7		8.31	7.4
				4	8		0.663333	2.61143		1.99	18.28
				4	10		1.19667	2.39		3.59	21.51
				11	11		1.388	1.579		13.88	15.79
				4	7		0.733333	2.52167		2.2	15.13
				11	6		1.148	1.236		11.48	6.18
				3	4		0.66	2.76667		1.32	8.3
				4	20		1.81667	2.10105		5.45	39.92
				9	12		2.03125	1.51182		16.25	16.63
				7	5		0.998333	1.745		5.99	6.98
				17	4		0.966875	1.97		15.47	5.91
				28	12		1.10407	2.20364		29.81	24.24
				15	10		1.32643	1.34778		18.57	12.13
				6	5		1.184	1.9775		5.92	7.91
				5	4		1.0725	0.756667		4.29	2.27
				8	3		0.897143	2.055		6.28	4.11
				5	14		0.6575	1.28		2.63	16.64
				12	4		0.746364	3.02		8.21	9.06
				48	4		1.18957	1.34333		55.91	4.03
				19	10		1.075	1.33		19.35	11.97
				9	8		0.89	1.60286		7.12	11.22
				22	4		1.18238	1.32		24.83	3.96
				3	3		1.37	2.52		2.74	5.04
				5	6		1.12	1.896		4.48	9.48
				4	10		0.053333	1.76667		0.16	15.9
				3	4		0.05	1.04		0.1	3.12
				5	7		0.0525	2.32333		0.21	13.94
				4	14		0.033333	1.57154		0.1	20.43
				6	6		0.06	1.97		0.3	9.85
				3	22		0.075	1.72		0.15	36.12
				8	8		0.051429	1.48429		0.36	10.39
				5	5		0.1775	0.9175		0.71	3.67
				3	12		0.095	1.41454		0.19	15.56
				8	12		0.067143	2.09455		0.47	23.04
				13	45		0.074167	1.36977		0.89	60.27
				4	11		0.056667	2.29		0.17	22.9
				20	5		0.068421	0.82		1.3	3.28
				3	6		0.105	1.788		0.21	8.94
				9	13		0.0925	1.30417		0.74	15.65
				17	7		0.09875	2.47		1.58	14.82
				11	3		0.062	1.455		0.62	2.91
				7	3		0.093333	1.135		0.56	2.27
				4	4		0.07	1.44667		0.21	4.34
				11	4		0.089	4.06667		0.89	12.2
				9	8		0.06125	2.04		0.49	14.28
				7	7		0.093333	1.75167		0.56	10.51
				15	5		0.065714	1.735		0.92	6.94
				10	6		0.067778	1.882		0.61	9.41
				5	11		0.0525	1.525		0.21	15.25
				5	14		0.065	1.36077		0.26	17.69
				6	13		0.086	1.295		0.43	15.54
				11	8		0.079	1.77286		0.79	12.41
				9	27		0.065	1.57808		0.52	41.03
				29	7		0.089643	1.48833		2.51	8.93
				3	8		0.09	1.34		0.18	9.38
				7	7		0.063333	1.72167		0.38	10.33
				11	9		0.063	1.3725		0.63	10.98
				8	9		0.072857	1.6		0.51	12.8
				12	15		0.12	1.43143		1.32	20.04
				9	12		0.065	1.01273		0.52	11.14
				14	12		0.060769	1.85091		0.79	20.36
				4	3		0.166667	1.41		0.5	2.82
				4	4		0.063333	1.29333		0.19	3.88
				4	11		0.06	1.456		0.18	14.56
				14	5		0.056923	1.8025		0.74	7.21
				9	32		0.08375	1.93161		0.67	59.88
				11	3		0.103	1.18		1.03	2.36
				27	9		0.098077	1.5925		2.55	12.74
				18	4		0.105882	1.10667		1.8	3.32
				16	11		0.13	1.762		1.95	17.62
				16	25		0.06	1.30708		0.9	31.37
				17	11		0.061875	1.36		0.99	13.6
				6	14		0.076	1.20538		0.38	15.67
				12	5		0.052727	1.5925		0.58	6.37
				15	6		0.087857	1.446		1.23	7.23
				10	7		0.057778	1.88333		0.52	11.3
				10	4		0.063333	2.76667		0.57	8.3
				11	3		0.061	1.42		0.61	2.84
				4	11		0.063333	1.821		0.19	18.21
				14	5		0.06	1.8775		0.78	7.51
				12	12		0.069091	2.03		0.76	22.33
				10	10		0.073333	1.69222		0.66	15.23
				12	5		0.083636	1.5875		0.92	6.35
				19	4		0.072778	1.89		1.31	5.67
				8	8		0.087143	1.00857		0.61	7.06
				21	9		0.064	2.5825		1.28	20.66
				26	6		0.0952	2.738		2.38	13.69
				11	4		0.125	2.13333		1.25	6.4
				17	14		0.108125	1.72154		1.73	22.38
				12	5		0.089091	1.635		0.98	6.54
				10	10		0.071111	1.48667		0.64	13.38
				10	7		0.096667	1.85167		0.87	11.11
				13	10		0.121667	2.09		1.46	18.81
				3	6		0.12	2.17		0.24	10.85
				10	24		0.094444	1.49913		0.85	34.48
				10	6		0.067778	2.862		0.61	14.31
				14	10		0.093077	2.01111		1.21	18.1
				8	3		0.101429	3.455		0.71	6.91
				7	9		0.061667	2.19625		0.37	17.57
				14	12		0.159231	1.33364		2.07	14.67
				4	20		0.116667	1.97053		0.35	37.44
				4	16		0.083333	1.65733		0.25	24.86
				10	8		0.071111	1.68857		0.64	11.82
				11	9		0.129	1.755		1.29	14.04
				6	17		0.128	2.32375		0.64	37.18
				11	4		0.081	1.58333		0.81	4.75
				31	19		0.106333	2.16167		3.19	38.91
				8	5		0.108571	1.3725		0.76	5.49
				23	3		0.091818	3.375		2.02	6.75
				20	12		0.084211	2.16818		1.6	23.85
				4	10		0.05	2.28333		0.15	20.55
				9	9		0.1125	2.07875		0.9	16.63
				24	6		0.098696	3.588		2.27	17.94
				7	8		0.063333	3.01429		0.38	21.1
				5	6		0.075	2.46		0.3	12.3
				7	6		0.113333	2.914		0.68	14.57
				13	18		0.0975	2.14588		1.17	36.48
				9	9		0.08625	2.65875		0.69	21.27
				15	4		0.076429	2.86667		1.07	8.6
				6	4		0.08	4.03333		0.4	12.1
				14	5		0.087692	1.2775		1.14	5.11
				3	16		0.19	2.454		0.38	36.81
				3	4		0.115	2.71667		0.23	8.15
				15	4		0.120714	1.68667		1.69	5.06
				6	20		0.098	2.08842		0.49	39.68
				26	15		0.1256	1.45286		3.14	20.34
				12	3		0.109091	2.19		1.2	4.38
				5	4		0.0925	2.20333		0.37	6.61
				3	3		0.125	1.645		0.25	3.29
				9	12		0.11375	1.36364		0.91	15
				22	5		0.15381	0.6375		3.23	2.55
				4	8		0.17	1.66143		0.51	11.63
				4	5		0.13	2.5275		0.39	10.11
				4	10		0.153333	1.27333		0.46	11.46
				18	5		0.125882	1.415		2.14	5.66
				12	11		0.110909	3.07		1.22	30.7
				5	8		0.0925	3.25714		0.37	22.8
				8	7		0.08	1.46167		0.56	8.77
				5	6		0.09	1.598		0.36	7.99
				26	3		0.1132	3.395		2.83	6.79
				7	5		0.086667	1.4325		0.52	5.73
				12	7		0.114545	2.065		1.26	12.39
				15	3		0.107857	0.48		1.51	0.96
				21	3		0.1405	0.92		2.81	1.84
				7	4		0.061667	1.56667		0.37	4.7
				7	5		0.08	2.85		0.48	11.4
				7	5		0.123333	1.78		0.74	7.12
				5	7		0.12	1.76		0.48	10.56
				4	5		0.176667	1.6025		0.53	6.41
				9	3		0.10625	1.435		0.85	2.87
				16	8		0.142	1.83143		2.13	12.82
				3	7		0.06	2.125		0.12	12.75
				6	5		0.09	1.74		0.45	6.96
				4	7		0.16	1.45833		0.48	8.75
				3	7		0.22	1.71		0.44	10.26
				8	7		0.111429	1.24333		0.78	7.46
				23	15		0.113636	1.63429		2.5	22.88
				18	4		0.108235	2.15333		1.84	6.46
				6	3		0.102	1.99		0.51	3.98
				15	3		0.098571	2.345		1.38	4.69
				3	5		0.085	0.82		0.17	3.28
				23	6		0.081364	1.4		1.79	7
				12	9		0.038182	1.71375		0.42	13.71
				3	13		2.07	1.6875		4.14	20.25
				4	29		0.693333	1.65643		2.08	46.38
				10	11		3.35444	1.836		30.19	18.36
				3	24		0.575	1.67783		1.15	38.59
				13	9		2.62667	1.42625		31.52	11.41
				5	11		1.455	1.444		5.82	14.44
				3	4		1.25	1.61333		2.5	4.84
				9	6		1.4475	0.848		11.58	4.24
				31	10		1.68467	1.39222		50.54	12.53
				3	8		2.68	0.994286		5.36	6.96
				4	4		1	1.09		3	3.27
				3	17		1.295	1.5725		2.59	25.16
				29	34		1.46607	1.43303		41.05	47.29
				9	11		1.31125	1.965		10.49	19.65
				8	5		1.9	1.43		13.3	5.72
				17	7		1.21938	2.37667		19.51	14.26
				21	11		1.8155	1.842		36.31	18.42
				3	4		1.415	1.81667		2.83	5.45
				37	13		1.39556	1.39167		50.24	16.7
				8	7		2.26	2.365		15.82	14.19
				27	13		1.66077	1.53083		43.18	18.37
				8	12		1.61571	1.79546		11.31	19.75
				8	7		2.07286	1.495		14.51	8.97
				21	3		2.17	0.785		43.4	1.57
				7	5		2.07167	1.9325		12.43	7.73
				3	6		0.695	1.61		1.39	8.05
				18	12		1.67941	1.54546		28.55	17
				7	6		1.20167	1.76		7.21	8.8
				6	13		1.838	1.78583		9.19	21.43
				3	12		3.31	2.12273		6.62	23.35
				10	10		2.30222	1.66222		20.72	14.96
				3	5		4.155	1.2		8.31	4.8
				7	19		1.75	1.70944		10.5	30.77
				35	16		1.70735	1.492		58.05	22.38
				20	6		1.52842	1.528		29.04	7.64
				3	7		3.975	1.45167		7.95	8.71
				11	5		1.639	2.1075		16.39	8.43
				29	6		1.495	1.476		41.86	7.38
				3	6		3.71	0.97		7.42	4.85
				6	13		1.634	0.951667		8.17	11.42
				3	27		2.05	1.65615		4.1	43.06
				16	7		1.35667	1.49833		20.35	8.99
				25	8		1.60875	1.43857		38.61	10.07
				19	9		1.045	0.86		18.81	6.88
				3	5		2.445	0.8275		4.89	3.31
				14	9		1.04923	1.1925		13.64	9.54
				13	3		1.30083	1.21		15.61	2.42
				14	6		1.30308	1.042		16.94	5.21
				29	9		1.66286	0.75625		46.56	6.05
				9	19		1.365	0.962778		10.92	17.33
				34	10		1.12152	1.01111		37.01	9.1
				29	6		1.44107	1.29		40.35	6.45
				18	3		1.33647	1.065		22.72	2.13
				27	4		1.27769	2.11667		33.22	6.35
				43	3		1.16952	0.65		49.12	1.3
				28	3		1.56333	0.91		42.21	1.82
				10	3		1.41444	2.445		12.73	4.89
				20	3		1.66263	0.99		31.59	1.98
				4	10		1.26667	0.998889		3.8	8.99
				6	5		2.722	0.7075		13.61	2.83
				28	9		1.79556	0.90125		48.48	7.21
				6	4		1.092	0.813333		5.46	2.44
				8	3		1.07143	1.195		7.5	2.39
				6	3		1.31	1.31		6.55	2.62
				16	10		1.232	1.09111		18.48	9.82
				4	3		1.53667	0.935		4.61	1.87
				9	4		1.4325	0.303333		11.46	0.91
				14	10		1.74385	1.03556		22.67	9.32
				3	7		1.055	0.808333		2.11	4.85
				11	17		1.704	1.28125		17.04	20.5
				13	4		0.876667	1.02		10.52	3.06
				12	14		1.10364	1.06231		12.14	13.81
				7	14		1.175	1.11231		7.05	14.46
				8	4		0.334286	0.84		2.34	2.52
				7	3		1.32333	1.8		7.94	3.6
				3	8		13.16	0.95		26.32	6.65
				3	8		11.505	0.544286		23.01	3.81
				7	19		7.64833	0.945556		45.89	17.02
				3	6		9.43	0.538		18.86	2.69
				4	10		14.7167	1.23778		44.15	11.14
				23	9		7.28409	0.73625		160.25	5.89
				17	4		10.1756	0.99		162.81	2.97
				10	11		5.57333	1.147		50.16	11.47
				9	17		6.87	0.984375		54.96	15.75
				4	7		11.1833	0.66		33.55	3.96
				6	6		7.554	0.562		37.77	2.81
				3	8		4.04	0.891429		8.08	6.24
				4	5		2.82667	0.795		8.48	3.18
				3	27		2.895	1.03769		5.79	26.98
				15	7		2.52071	0.043333		35.29	0.26
				6	5		3.412	0.035		17.06	0.14
				12	3		2.54636	0.045		28.01	0.09
				23	9		1.53273	0.2975		33.72	2.38
				6	4		3.984	0.03		19.92	0.09
				3	5		2.155	0.1075		4.31	0.43
				50	4		1.51041	0.083333		74.01	0.25
				3	3		3.8	0.03		7.6	0.06
				9	10		3.76625	0.152222		30.13	1.37
				12	5		1.71909	0.1375		18.91	0.55
				6	7		3.524	0.258333		17.62	1.55
				37	8		1.81556	0.144286		65.36	1.01
				3	8		1.46	0.231429		2.92	1.62
				5	4		2.4425	0.136667		9.77	0.41
				16	5		1.94733	0.165		29.21	0.66
				13	8		3.4575	0.208571		41.49	1.46
				14	4		1.65231	0.223333		21.48	0.67
				5	5		2.6775	0.1525		10.71	0.61
				9	4		1.34	0.183333		10.72	0.55
				6	6		2.63	0.202		13.15	1.01
				10	5		2.08556	0.2775		18.77	1.11
				4	3		2.48667	0.51		7.46	1.02
				4	3		2.45667	0.24		7.37	0.48
				4	11		1.2	0.333		3.6	3.33
				24	3		1.49478	0.14		34.38	0.28
				51	5		1.3296	0.2		66.48	0.8
				8	3		2.86143	0.125		20.03	0.25
				19	3		1.44889	0.275		26.08	0.55
				9	4		2.4875	0.336667		19.9	1.01
				11	4		1.217	0.316667		12.17	0.95
				15	6		1.56929	0.196		21.97	0.98
				6	8		2.142	0.151429		10.71	1.06
				10	6		1.60333	0.124		14.43	0.62
				3	4		1.245	0.083333		2.49	0.25
				9	16		1.16625	0.234667		9.33	3.52
				9	3		1.75375	0.415		14.03	0.83
				33	7		1.26188	0.208333		40.38	1.25
				5	3		2.335	0.185		9.34	0.37
				3	4		3.11	0.176667		6.22	0.53
				3	22		1.31	0.15619		2.62	3.28
				4	4		4.11333	0.24		12.34	0.72
				26	6		1.6668	0.106		41.67	0.53
				46	7		1.63578	0.175		73.61	1.05
				4	8		1.22	0.17		3.66	1.19
				3	6		1.71	0.272		3.42	1.36
				8	12		1.48286	0.254545		10.38	2.8
				4	12		1.67667	0.17		5.03	1.87
				5	3		0.895	0.215		3.58	0.43
				15	14		1.87929	0.267692		26.31	3.48
				7	9		1.66167	0.20875		9.97	1.67
				7	7		1.41667	0.293333		8.5	1.76
				3	14		1.265	0.213846		2.53	2.78
				31	3		1.18967	0.275		35.69	0.55
				3	3		1.535	0.07		3.07	0.14
				7	6		1.05	0.214		6.3	1.07
				24	5		1.53348	0.1225		35.27	0.49
				4	4		2.38333	0.146667		7.15	0.44
				25	3		1.76417	0.165		42.34	0.33
				4	8		1.78333	0.12		5.35	0.84
				5	4		2.6325	0.076667		10.53	0.23
				3	4		2.15	0.076667		4.3	0.23
				37	3		1.36139	0.055		49.01	0.11
				8	5		1.72857	0.16		12.1	0.64
				6	4		2.582	0.123333		12.91	0.37
				7	5		2.14	0.1025		12.84	0.41
				30	3		1.61414	0.025		46.81	0.05
				5	8		1.7075	0.067143		6.83	0.47
				3	8		2.395	0.048571		4.79	0.34
				6	13		1.306	0.105		6.53	1.26
				3	12		0.66	0.069091		1.32	0.76
				10	4		1.19444	0.05		10.75	0.15
				18	9		1.17882	0.12375		20.04	0.99
				11	4		1.161	0.076667		11.61	0.23
				14	5		0.927692	0.1475		12.06	0.59
				3	10		0.355	0.108889		0.71	0.98
				16	8		1.872	0.095714		28.08	0.67
				4	16		1.87333	0.081333		5.62	1.22
				3	3		1.11	0.035		2.22	0.07
				3	5		0.285	0.1775		0.57	0.71
				5	9		1.535	0.06375		6.14	0.51
				13	5		1.30833	0.0575		15.7	0.23
				7	6		1.63333	0.094		9.8	0.47
				6	11		1.726	0.129		8.63	1.29
				3	14		1.78	0.084615		3.56	1.1
				17	3		1.22313	0.25		19.57	0.5
				17	11		0.926875	0.11		14.83	1.1
				36	11		1.20229	0.14		42.08	1.4
				6	19		0.7	0.143333		3.5	2.58
				6	11		1.176	0.165		5.88	1.65
				9	6		0.96875	0.104		7.75	0.52
				21	6		1.1305	0.046		22.61	0.23
				5	18		1.7275	0.137647		6.91	2.34
				8	3		1.19857	0.09		8.39	0.18
				5	10		0.925	0.082222		3.7	0.74
				12	16		1.13727	0.074667		12.51	1.12
				4	4		0.713333	0.07		2.14	0.21
				19	3		1.40222	0.045		25.24	0.09
				30	10		1.30759	0.101111		37.92	0.91
				6	17		1.276	0.140625		6.38	2.25
				17	6		0.871875	0.216		13.95	1.08
				8	47		1.22286	0.098043		8.56	4.51
				9	4		0.86125	0.17		6.89	0.51
				4	24		2.22333	0.09913		6.67	2.28
				13	5		0.676667	0.06		8.12	0.24
				3	5		1.525	0.065		3.05	0.26
				4	12		1.17667	0.114545		3.53	1.26
				7	11		0.668333	0.099		4.01	0.99
				3	4		0.715	0.113333		1.43	0.34
				7	30		1.38833	0.065517		8.33	1.9
				26	14		0.9312	0.097692		23.28	1.27
				4	11		0.793333	0.119		2.38	1.19
				8	5		0.562857	0.0775		3.94	0.31
				4	4		0.91	0.166667		2.73	0.5
				13	5		1.12167	0.0375		13.46	0.15
				34	3		1.09546	0.08		36.15	0.16
				8	7		0.921429	0.101667		6.45	0.61
				11	3		1.079	0.125		10.79	0.25
				4	6		0.193333	0.106		0.58	0.53
				3	4		4.48	0.14		8.96	0.42
				4	3		1.20667	0.095		3.62	0.19
				3	3		0.48	0.095		0.96	0.19
				3	4		0.865	0.09		1.73	0.27
				17	13		1.74125	0.144167		27.86	1.73
				23	4		1.565	0.11		34.43	0.33
				16	3		1.18867	0.305		17.83	0.61
				6	6		2.322	0.168		11.61	0.84
				6	3		1.098	0.055		5.49	0.11
				13	9		1.21333	0.10625		14.56	0.85
				15	3		1.66643	0.05		23.33	0.1
				4	6		4.08333	0.076		12.25	0.38
				5	5		1.38	0.0825		5.52	0.33
				14	4		1.65615	0.1		21.53	0.3
				5	4		2.4225	0.17		9.69	0.51
				6	14		2.02	0.079231		10.1	1.03
				32	3		1.78387	0.205		55.3	0.41
				5	3		1.1325	0.16		4.53	0.32
				5	4		1.8775	0.14		7.51	0.42
				7	5		1.54333	0.2175		9.26	0.87
				4	5		3.48667	0.16		10.46	0.64
				4	25		2.84	0.097917		8.52	2.35
				4	8		0.933333	0.151429		2.8	1.06
				13	3		1.29	0.105		15.48	0.21
				21	8		1.9255	0.12		38.51	0.84
				6	4		1.568	0.11		7.84	0.33
				14	7		1.48462	0.115		19.3	0.69
				32	4		1.17516	0.07		36.43	0.21
				4	3		1.74333	0.175		5.23	0.35
				5	3		1.1475	0.15		4.59	0.3
				10	5		1.32	0.085		11.88	0.34
				8	3		2.69429	0.105		18.86	0.21
				4	7		0.89	0.126667		2.67	0.76
				12	7		1.09636	0.138333		12.06	0.83
[truncated: 1,819 more rows]
[truncated: 3 more columns]
