# Supplementary material for: Mechanism for differential recruitment of orbitostriatal transmission during actions and outcomes following chronic alcohol exposure
Source: eLife. 2021 Mar 17;10:e67065. doi: 10.7554/eLife.67065 (PMC8016477; doi:10.7554/eLife.67065)
Supplement: Figure 6—source data 1. [file elife-67065-fig6-data1.xlsx]

## Sheet: Sheet1
	C. Lever presses
	Air																	CIE
CRF	3	5	5	5	6	6	5	2	5	5	5	5	5	5	5			5	5	5	5	5	8	5	5	2	5	4	5	5	5	6	5	2
CRF	15	15	9	7	15	16	15	4	5	15	15	8	15	17	17			17	15	15	15	15	11	2	1	2	15	12	15	15	15	17	1	16
CRF	30	30	18	16	30	30	24	20	20	30	30	31	30	31	30			30	30	30	30	30	31	4	4	0	30	32	30	31	30	30	24	30
1	246	287	16	118	164	263	264	156	93	276	218	331	361	284	360			137	151	347	100	59	327	56	17	6	133	270	325	280	386	319	270	261
2	348	356	28	184	108	260	273	235	150	337	267	212	285	203	253			314	287	316	211	91	273	229	116	5	201	267	290	309	311	358	273	429
3	461	394	91	222	239	787	418	261	284	585	620	515	641	810	652			322	366	499	363	138	405	468	426	14	485	587	537	486	489	842	659	626
4	751	438	94	327	356	892	539	378	452	571	623	449	511	480	746			346	587	549	639	192	542	568	691	20	319	577	613	458	618	532	592	640
5	749	798	108	422	524	534	419	445	604	538	648	677	693	631	507			435	539	779	483	252	447	533	665	25	356	489	698	680	654	566	808	581
6	753	595	393	539	420	654	428	466	374	470	722	513	643	780	550			465	692	643	593	242	552	657	454	205	483	506	388	596	709	561	512	393
	D. Reinforcers earned
	Air																	CIE
CRF	3	5	5	6	2	5	6	5	5	5	5	5	5	5	5			5	5	5	5	5	7	5	5	2	5	4	5	5	5	6	5	2
CRF	15	15	9	16	4	7	15	15	5	8	15	17	15	15	17			17	15	15	15	15	11	2	1	2	15	12	15	15	15	17	1	16
CRF	30	30	18	30	20	16	30	24	20	31	30	30	30	30	30			30	30	30	30	30	31	4	4	0	30	32	30	31	30	30	24	30
1	23	30	0	30	15	9	14	25	11	30	30	30	30	30	30			14	19	30	11	3	24	5	0	1	11	21	30	30	30	30	30	30
2	30	30	4	30	21	15	14	25	20	30	30	30	30	30	30			30	30	30	27	13	27	23	11	1	21	23	30	30	30	30	22	26
3	25	30	4	45	12	16	12	23	13	30	30	30	30	30	30			18	20	30	18	10	17	27	16	1	24	30	30	31	30	30	30	30
4	28	30	2	30	14	21	25	28	27	30	30	30	30	28	30			19	30	30	29	9	30	30	29	0	19	25	30	30	30	30	30	30
5	30	30	4	30	26	15	22	25	24	30	30	30	30	30	30			17	30	30	30	15	30	30	30	3	20	30	30	30	30	30	30	30
6	30	30	19	30	21	30	27	27	22	30	30	30	30	30	30			30	30	30	30	16	30	30	30	7	26	24	30	30	30	30	30	30
	F. Air - Veh								F. Air - SR									F. CIE - Veh								F. CIE - SR
Valued	0.56481	0.51852	0.60606	0.75	0.66798	0.83478	0.68531		0.92481	0.84698	0.5	0.51351	0.53488	0.57576	0.55789	0.74497		0.51899	0.56849	0.46479	0.47904	0.55556	0.51818	0.40237		0.94194	0.696	0.64336	0.39823	0.63014	0.80795	0.85333	0.79808	0.95
Devalued	0.43519	0.48148	0.39394	0.25	0.33202	0.16522	0.31469		0.07519	0.15302	0.5	0.48649	0.46512	0.42424	0.44211	0.25503		0.48101	0.43151	0.53521	0.52096	0.44444	0.48182	0.59763		0.05806	0.304	0.35664	0.60177	0.36986	0.19205	0.14667	0.20192	0.05
